# Supplementary material for: Facing the infinity: tackling large samples of challenging Chironomidae (Diptera) with an integrative approach
Source: PeerJ journal article supplement (doi:10.7717/peerj.15336), 2023-05-22
Supplement: Supplementary_Data_S1.pdf [file Supplementary_Data_S1.pdf]

GDIP3610-22 ASAP 36 RESL BOLD:AAC0597 Chironomidae sp. Sp.lid 22  
GDIP3628-22 ASAP 36 RESL BOLD:AAC0597 Chironomidae sp. Sp.lid 22  
GDIP3582-22 ASAP 36 RESL BOLD:AAC0597 Glyptotendipes paripes Sp.lid 22  
GDIP3567-22 ASAP 36 RESL BOLD:AAC0597 Chironomidae sp. Sp.lid 22  
GDIP3564-22 ASAP 36 RESL BOLD:AAC0597 Chironomidae sp. Sp.lid 22  
GDIP3814-22 ASAP 36 RESL BOLD:AAC0597 Glyptotendipes paripes Sp.lid 22  
GDIP3813-22 ASAP 36 RESL BOLD:AAC0597 Glyptotendipes paripes Sp.lid 22  
GDIP3811-22 ASAP 36 RESL BOLD:AAC0597 Chironomidae sp. Sp.lid 22  
GDIP3810-22 ASAP 36 RESL BOLD:AAC0597 Glyptotendipes paripes Sp.lid 22  
GDIP3809-22 ASAP 36 RESL BOLD:AAC0597 Glyptotendipes paripes Sp.lid 22  
GDIP3808-22 ASAP 36 RESL BOLD:AAC0597 Glyptotendipes paripes Sp.lid 22  
GDIP3566-22 ASAP 36 RESL BOLD:AAC0597 Chironomidae sp. Sp.lid 22  
GDIP3546-22 ASAP 36 RESL BOLD:AAC0597 Chironomidae sp. Sp.lid 22  
GDIP3696-22 ASAP 36 RESL BOLD:AAC0597 Glyptotendipes paripes Sp.lid 22  
GDIP3604-22 ASAP 36 RESL BOLD:AAC0597 Chironomidae sp. Sp.lid 22  
GDIP3815-22 ASAP 36 RESL BOLD:AAC0597 Chironomidae sp. Sp.lid 22  
GDIP3568-22 ASAP 36 RESL BOLD:AAC0597 Chironomidae sp. Sp.lid 22  
GDIP3807-22 ASAP 36 RESL BOLD:AAC0597 Glyptotendipes paripes Sp.lid 22  
GDIP3540-22 ASAP 36 RESL BOLD:AAC0597 Chironomidae sp. Sp.lid 22  
GDIP3812-22 ASAP 36 RESL BOLD:AAC0597 Glyptotendipes paripes Sp.lid 22  
GDIP3816-22 ASAP 36 RESL BOLD:AAC0597 Chironomidae sp. Sp.lid 22  
GDIP3583-22 ASAP 36 RESL BOLD:AAC0597 Glyptotendipes glaucus Sp.lid 22  
GDIP3667-22 ASAP 30 RESL BOLD:AAX4146 Microchironomus tener Sp.lid 49  
GDIP3689-22 ASAP 30 RESL BOLD:AAX4146 Microchironomus tener Sp.lid 49  
GDIP3792-22 ASAP 30 RESL BOLD:AAX4146 Microchironomus tener Sp.lid 49  
GDIP3671-22 ASAP 30 RESL BOLD:AAX4146 Microchironomus tener Sp.lid 49  
GDIP3800-22 ASAP 30 RESL BOLD:AAX4146 Microchironomus tener Sp.lid 49  
GDIP3801-22 ASAP 33 RESL BOLD:AAY2074 Harnischia curtilamellata Sp.lid 36  
GDIP3623-22 ASAP 33 RESL BOLD:AAY2074 Harnischia curtilamellata Sp.lid 36  
GDIP3834-22 ASAP 34 RESL BOLD:AAX2700 Parachironomus gracilior Sp.lid 19  
GDIP3675-22 ASAP 34 RESL BOLD:AAX2700 Parachironomus gracilior Sp.lid 19  
GDIP3636-22 ASAP 34 RESL BOLD:AAX2700 Parachironomus gracilior Sp.lid 19  
GDIP3805-22 ASAP 34 RESL BOLD:AAX2700 Parachironomus gracilior Sp.lid 19  
GDIP3571-22 ASAP 34 RESL BOLD:AAX2700 Parachironomus gracilior Sp.lid 19  
GDIP3602-22 ASAP 34 RESL BOLD:AAX2700 Parachironomus gracilior Sp.lid 19  
GDIP3631-22 ASAP 34 RESL BOLD:AAX2700 Parachironomus gracilior Sp.lid 19  
GDIP3659-22 ASAP 34 RESL BOLD:AAX2700 Parachironomus gracilior Sp.lid 19  
GDIP3705-22 ASAP 42 RESL BOLD:AAU1021 Dicrotendipes nervosus Sp.lid 37  
GDIP3706-22 ASAP 42 RESL BOLD:AAU1021 Dicrotendipes nervosus Sp.lid 37  
GDIP3624-22 ASAP 42 RESL BOLD:AAU1021 Dicrotendipes nervosus Sp.lid 37  
GDIP3724-22 ASAP 42 RESL BOLD:AAU1021 Dicrotendipes tritonus Sp.lid 37  
GDIP3833-22 ASAP 42 RESL BOLD:AAU1021 Dicrotendipes nervosus Sp.lid 37  
GDIP3655-22 ASAP 50 RESL BOLD:AAF8348 Glyptotendipes cauliginellus Sp.lid 10  
GDIP3663-22 ASAP 50 RESL BOLD:AAF8348 Glyptotendipes cauliginellus Sp.lid 10  
GDIP3721-22 ASAP 50 RESL BOLD:AAF8348 Glyptotendipes cauliginellus Sp.lid 10

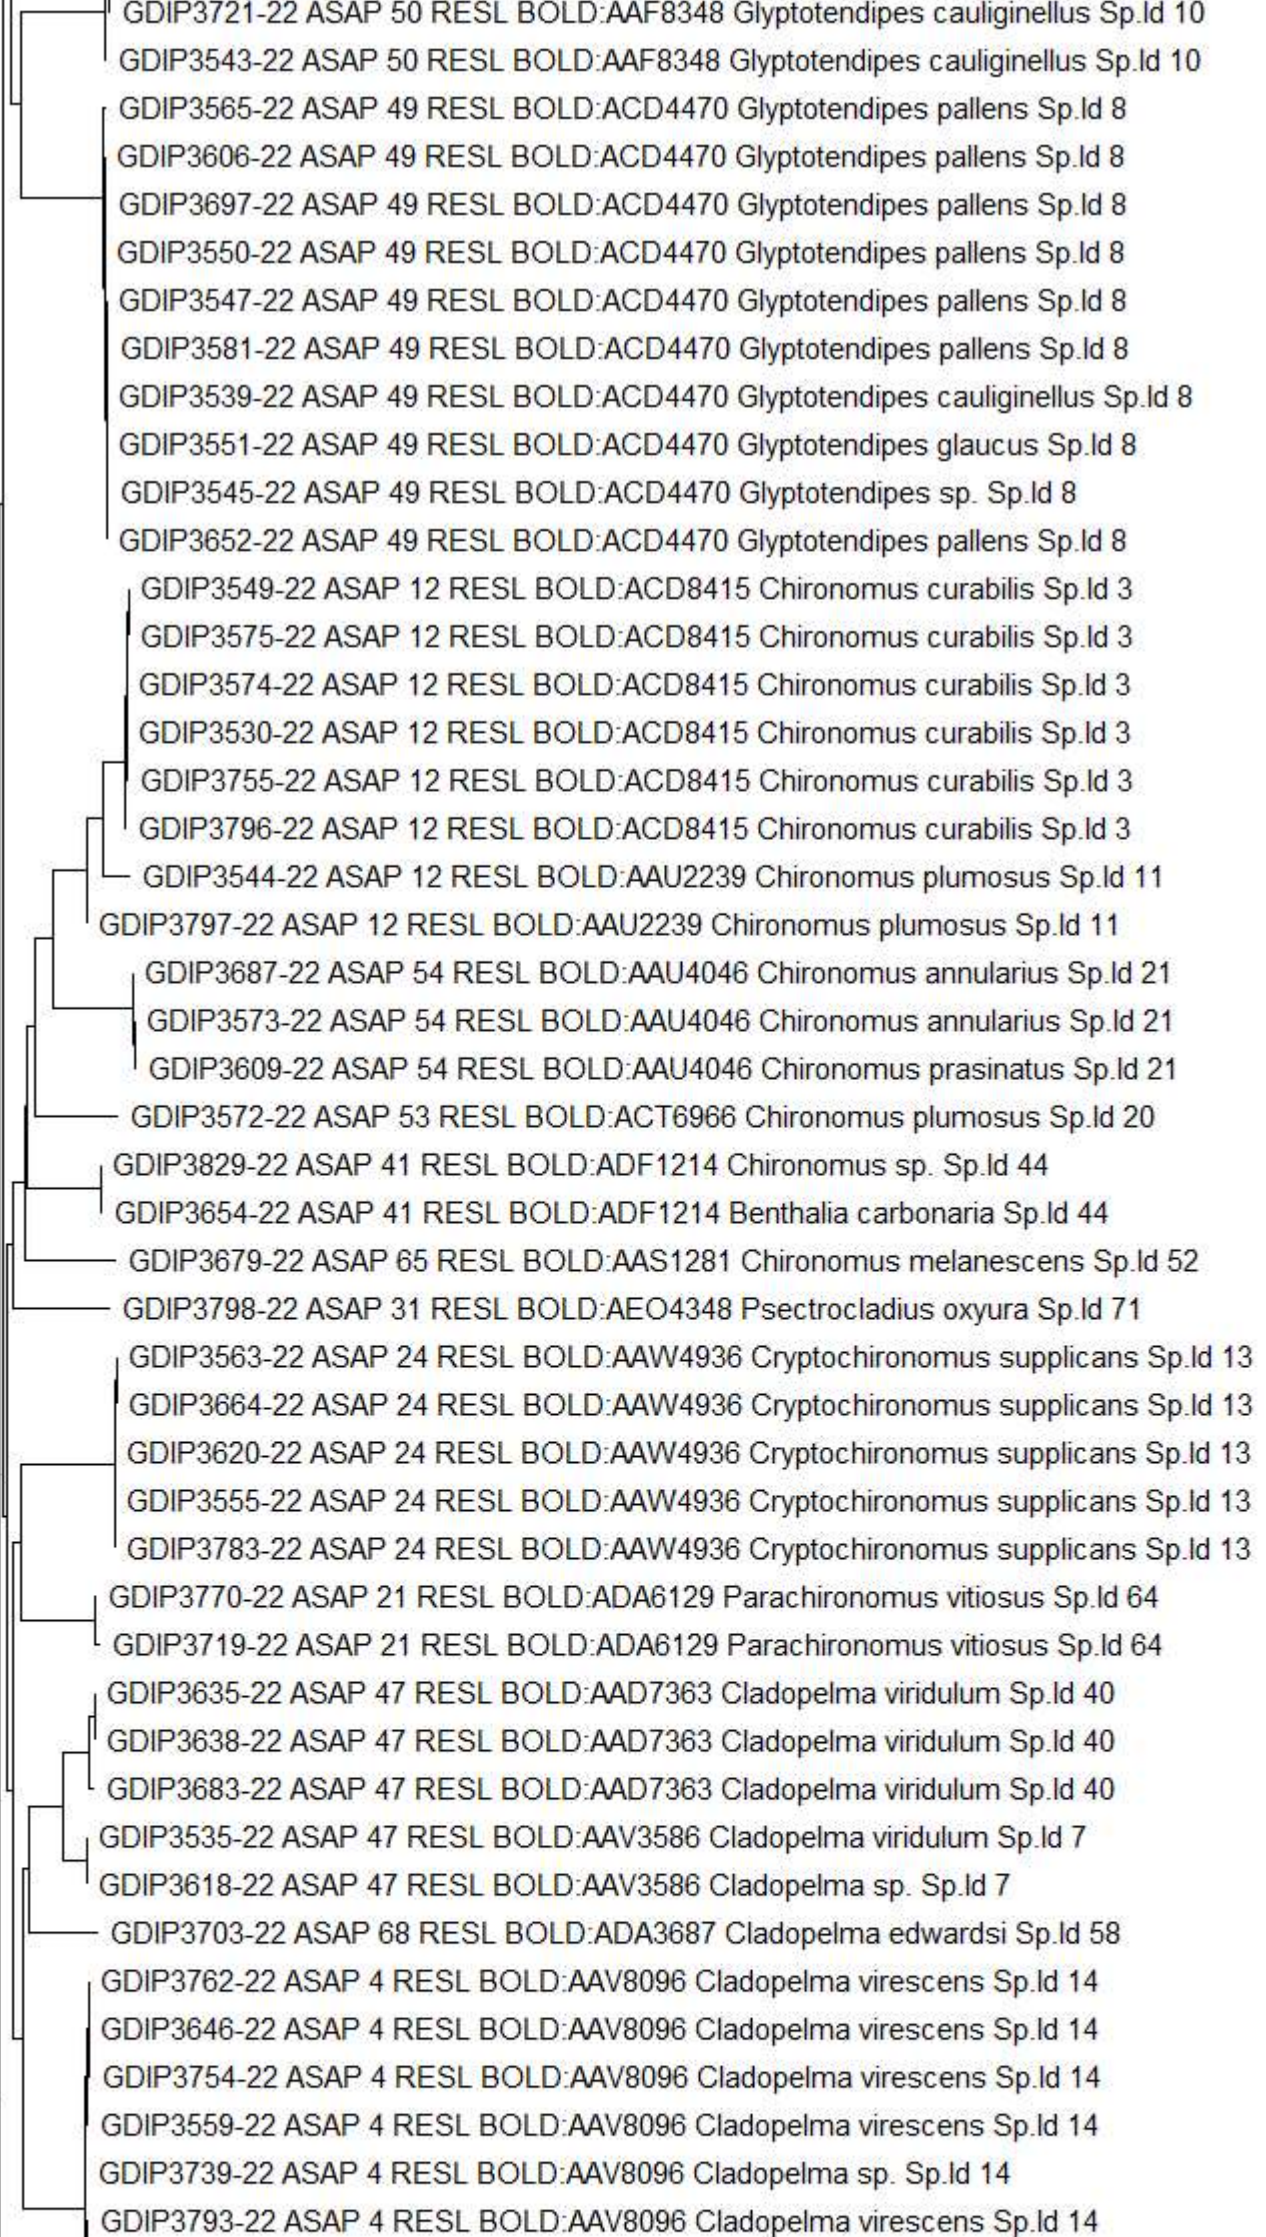

GDIP3793-22 ASAP 4 RESL BOLD:AAV8096 Cladopelma virescens Sp.lid 14  
GDIP3622-22 ASAP 4 RESL BOLD:AAV8096 Cladopelma virescens Sp.lid 14  
GDIP3830-22 ASAP 4 RESL BOLD:AAV8096 Cladopelma virescens Sp.lid 14  
GDIP3831-22 ASAP 4 RESL BOLD:AAV8096 Cladopelma virescens Sp.lid 14  
GDIP3529-22 ASAP 44 RESL BOLD:AAP6555 Parachironomus digitalis Sp.lid 2  
GDIP3717-22 ASAP 44 RESL BOLD:AAP6555 Parachironomus digitalis Sp.lid 2  
GDIP3720-22 ASAP 44 RESL BOLD:AAP6555 Parachironomus digitalis Sp.lid 2  
GDIP3537-22 ASAP 45 RESL BOLD:AAW4677 Kiefferulus tendipediformis Sp.lid 4  
GDIP3722-22 ASAP 45 RESL BOLD:AAW4677 Kiefferulus tendipediformis Sp.lid 4  
GDIP3531-22 ASAP 45 RESL BOLD:AAW4677 Kiefferulus tendipediformis Sp.lid 4  
GDIP3729-22 ASAP 45 RESL BOLD:AAW4677 Kiefferulus tendipediformis Sp.lid 4  
GDIP3768-22 ASAP 19 RESL BOLD:ACY5073 Parachironomus gracilior Sp.lid 1  
GDIP3802-22 ASAP 19 RESL BOLD:ACY5073 Parachironomus gracilior Sp.lid 1  
GDIP3536-22 ASAP 19 RESL BOLD:ACY5073 Parachironomus monochromus Sp.lid 1  
GDIP3548-22 ASAP 19 RESL BOLD:ACY5073 Parachironomus monochromus Sp.lid 1  
GDIP3786-22 ASAP 19 RESL BOLD:ACY5073 Parachironomus monochromus Sp.lid 1  
GDIP3788-22 ASAP 19 RESL BOLD:ACY5073 Parachironomus monochromus Sp.lid 1  
GDIP3790-22 ASAP 19 RESL BOLD:ACY5073 Parachironomus monochromus Sp.lid 1  
GDIP3528-22 ASAP 19 RESL BOLD:ACY5073 Parachironomus gracilior Sp.lid 1  
GDIP3570-22 ASAP 19 RESL BOLD:ACY5073 Parachironomus monochromus Sp.lid 1  
GDIP3600-22 ASAP 19 RESL BOLD:ACY5073 Parachironomus monochromus Sp.lid 1  
GDIP3607-22 ASAP 19 RESL BOLD:ACY5073 Parachironomus monochromus Sp.lid 1  
GDIP3680-22 ASAP 19 RESL BOLD:ACY5073 Parachironomus monochromus Sp.lid 1  
GDIP3832-22 ASAP 15 RESL BOLD:ACD5349 Glyptotendipes imbecilis Sp.lid 31  
GDIP3626-22 ASAP 15 RESL BOLD:ACD5349 Glyptotendipes imbecilis Sp.lid 31  
GDIP3676-22 ASAP 15 RESL BOLD:ACD5349 Glyptotendipes imbecilis Sp.lid 31  
GDIP3670-22 ASAP 15 RESL BOLD:ACD5349 Glyptotendipes imbecilis Sp.lid 31  
GDIP3761-22 ASAP 15 RESL BOLD:ACD5349 Glyptotendipes imbecilis Sp.lid 31  
GDIP3782-22 ASAP 15 RESL BOLD:ACD5349 Glyptotendipes imbecilis Sp.lid 31  
GDIP3603-22 ASAP 15 RESL BOLD:ACD5349 Glyptotendipes imbecilis Sp.lid 31  
GDIP3685-22 ASAP 15 RESL BOLD:ACD5349 Glyptotendipes imbecilis Sp.lid 31  
GDIP3763-22 ASAP 16 RESL BOLD:ACG9929 Tanytarsus medius Sp.lid 62  
GDIP3715-22 ASAP 16 RESL BOLD:ACG9929 Tanytarsus dispar Sp.lid 62  
GDIP3725-22 ASAP 16 RESL BOLD:ACG9929 Tanytarsus dispar Sp.lid 62  
GDIP3769-22 ASAP 20 RESL BOLD:AEO0788 Tanytarsus usmaensis Sp.lid 63  
GDIP3718-22 ASAP 20 RESL BOLD:AEO0788 Tanytarsus usmaensis Sp.lid 63  
GDIP3799-22 ASAP 32 RESL BOLD:ACF7553 Tanytarsus heusdensis Sp.lid 59  
GDIP3708-22 ASAP 32 RESL BOLD:ACF7553 Tanytarsus reei Sp.lid 59  
GDIP3789-22 ASAP 28 RESL BOLD:ADA8135 Rheotanytarsus photophilus Sp.lid 15  
GDIP3795-22 ASAP 28 RESL BOLD:ADA8135 Rheotanytarsus photophilus Sp.lid 15  
GDIP3560-22 ASAP 28 RESL BOLD:ADA8135 Rheotanytarsus photophilus Sp.lid 15  
GDIP3673-22 ASAP 28 RESL BOLD:ADA8135 Rheotanytarsus photophilus Sp.lid 15  
GDIP3561-22 ASAP 51 RESL BOLD:AAV8401 Tanytarsus excavatus Sp.lid 16  
GDIP3637-22 ASAP 51 RESL BOLD:AAV8401 Tanytarsus excavatus Sp.lid 16  
GDIP3619-22 ASAP 59 RESL BOLD:AAD7154 Paratanytarsus laetipes Sp.lid 35  
GDIP3710-22 ASAP 59 RESL BOLD:AAD7154 Paratanytarsus laetipes Sp.lid 35  
GDIP3678-22 ASAP 59 RESL BOLD:AAD7154 Paratanytarsus laetipes Sp.lid 35

GDIP3678-22 ASAP 59 RESL BOLD:AAD7154 Paratanytarsus laetipes Sp.lid 35  
GDIP3534-22 ASAP 46 RESL BOLD:ACO9916 Paratanytarsus tenellulus Sp.lid 6  
GDIP3731-22 ASAP 46 RESL BOLD:ACO9916 Paratanytarsus tenellulus Sp.lid 6  
GDIP3686-22 ASAP 29 RESL BOLD:AAD1485 Paratanytarsus grimmii Sp.lid 53  
GDIP3692-22 ASAP 29 RESL BOLD:AAD1485 Paratanytarsus grimmii Sp.lid 53  
GDIP3794-22 ASAP 29 RESL BOLD:AAD1485 Paratanytarsus grimmii Sp.lid 53  
GDIP3791-22 ASAP 29 RESL BOLD:AAD1485 Paratanytarsus grimmii Sp.lid 53  
GDIP3666-22 ASAP 18 RESL BOLD:AAU1200 Paratanytarsus inopertus Sp.lid 48  
GDIP3716-22 ASAP 18 RESL BOLD:AAU1200 Paratanytarsus inopertus Sp.lid 48  
GDIP3804-22 ASAP 18 RESL BOLD:AAU1200 Paratanytarsus inopertus Sp.lid 48  
GDIP3803-22 ASAP 18 RESL BOLD:AAU1200 Paratanytarsus inopertus Sp.lid 48  
GDIP3767-22 ASAP 18 RESL BOLD:AAU1200 Paratanytarsus inopertus Sp.lid 48  
GDIP3765-22 ASAP 17 RESL BOLD:AAW4635 Paratanytarsus dissimilis Sp.lid 30  
GDIP3704-22 ASAP 17 RESL BOLD:AAW4635 Paratanytarsus dissimilis Sp.lid 30  
GDIP3682-22 ASAP 17 RESL BOLD:AAW4635 Paratanytarsus dissimilis Sp.lid 30  
GDIP3764-22 ASAP 17 RESL BOLD:AAW4635 Paratanytarsus dissimilis Sp.lid 30  
GDIP3766-22 ASAP 17 RESL BOLD:AAW4635 Paratanytarsus dissimilis Sp.lid 30  
GDIP3601-22 ASAP 17 RESL BOLD:AAW4635 Paratanytarsus dissimilis Sp.lid 30  
GDIP3734-22 ASAP 1 RESL BOLD:AAY3395 Polypedilum nubeculosum Sp.lid 9  
GDIP3542-22 ASAP 1 RESL BOLD:AAY3395 Polypedilum nubeculosum Sp.lid 9  
GDIP3702-22 ASAP 1 RESL BOLD:AAY3395 Polypedilum nubeculosum Sp.lid 9  
GDIP3613-22 ASAP 1 RESL BOLD:AAY3395 Polypedilum nubeculosum Sp.lid 9  
GDIP3541-22 ASAP 1 RESL BOLD:AAY3395 Polypedilum nubeculosum Sp.lid 9  
GDIP3605-22 ASAP 1 RESL BOLD:AAY3395 Polypedilum nubeculosum Sp.lid 9  
GDIP3735-22 ASAP 1 RESL BOLD:AAY3395 Polypedilum nubeculosum Sp.lid 9  
GDIP3736-22 ASAP 1 RESL BOLD:AAY3395 Polypedilum nubeculosum Sp.lid 9  
GDIP3672-22 ASAP 64 RESL BOLD:ACX5929 Polypedilum cultellatum Sp.lid 51  
GDIP3730-22 ASAP 64 RESL BOLD:AAH7761 Polypedilum cultellatum Sp.lid 66  
GDIP3713-22 ASAP 71 RESL BOLD:AEJ5219  
GDIP3562-22 ASAP 48 RESL BOLD:AAW5643 Endochironomus albipennis Sp.lid 17  
GDIP3621-22 ASAP 48 RESL BOLD:AAW5643 Endochironomus stackelbergi Sp.lid 17  
GDIP3557-22 ASAP 48 RESL BOLD:AAW5643 Endochironomus sp. Sp.lid 17  
GDIP3576-22 ASAP 48 RESL BOLD:AAW5643 Endochironomus sp. Sp.lid 17  
GDIP3579-22 ASAP 48 RESL BOLD:AAW5643 Endochironomus sp. Sp.lid 17  
GDIP3580-22 ASAP 48 RESL BOLD:AAW5643 Endochironomus sp. Sp.lid 17  
GDIP3614-22 ASAP 48 RESL BOLD:AAW5643 Endochironomus sp. Sp.lid 17  
GDIP3538-22 ASAP 48 RESL BOLD:AAW5643 Endochironomus sp. Sp.lid 17  
GDIP3556-22 ASAP 48 RESL BOLD:AAW5643 Endochironomus sp. Sp.lid 17  
GDIP3577-22 ASAP 48 RESL BOLD:AAW5643 Endochironomus albipennis Sp.lid 17  
GDIP3578-22 ASAP 48 RESL BOLD:AAW5643 Endochironomus sp. Sp.lid 17  
GDIP3653-22 ASAP 48 RESL BOLD:AAW5643 Endochironomus sp. Sp.lid 17  
GDIP3806-22 ASAP 35 RESL BOLD:AAP5616 Tanytarsus brundini Sp.lid 72  
GDIP3784-22 ASAP 25 RESL BOLD:ACR0263 Microtendipes pedellus Sp.lid 70  
GDIP3532-22 ASAP 26 RESL BOLD:ACY5270 Microtendipes chloris Sp.lid 5  
GDIP3533-22 ASAP 26 RESL BOLD:ACY5270 Microtendipes chloris Sp.lid 5  
GDIP3723-22 ASAP 26 RESL BOLD:ACY5270 Microtendipes chloris Sp.lid 5  
GDIP3785-22 ASAP 26 RESL BOLD:ACY5270 Microtendipes chloris Sp.lid 5

GDIP3785-22 ASAP 26 RESL BOLD:ACY5270 *Microtendipes chloris* Sp.lid 5  
GDIP3665-22 ASAP 26 RESL BOLD:ACY5270 *Microtendipes chloris* Sp.lid 5  
GDIP3657-22 ASAP 61 RESL BOLD:ADF3485 *Polypedilum sordens* Sp.lid 45  
GDIP3787-22 ASAP 27 RESL BOLD:ACY3855 *Polypedilum sordens* Sp.lid 32  
GDIP3612-22 ASAP 27 RESL BOLD:ACY3855 *Polypedilum sordens* Sp.lid 32  
GDIP3681-22 ASAP 27 RESL BOLD:ACY3855 *Polypedilum sordens* Sp.lid 32  
GDIP3819-22 ASAP 27 RESL BOLD:ACY3855 *Polypedilum sordens* Sp.lid 32  
GDIP3733-22 ASAP 27 RESL BOLD:ACY3855 *Polypedilum sordens* Sp.lid 32  
GDIP3780-22 ASAP 5 RESL BOLD:ACB6320 *Procladius* sp. Sp.lid 28  
GDIP3732-22 ASAP 5 RESL BOLD:ACB6320 *Procladius crassinervis* Sp.lid 28  
GDIP3627-22 ASAP 5 RESL BOLD:ACB6320 *Procladius crassinervis* Sp.lid 28  
GDIP3598-22 ASAP 5 RESL BOLD:ACB6320 *Procladius crassinervis* Sp.lid 28  
GDIP3554-22 ASAP 5 RESL BOLD:ACB6320 *Procladius* sp. Sp.lid 28  
GDIP3775-22 ASAP 5 RESL BOLD:ACB6320 *Procladius* sp. Sp.lid 28  
GDIP3741-22 ASAP 5 RESL BOLD:ACB6320 *Procladius crassinervis* Sp.lid 28  
GDIP3740-22 ASAP 5 RESL BOLD:ACB6320 *Procladius crassinervis* Sp.lid 28  
GDIP3776-22 ASAP 23 RESL BOLD:ACW5385 *Procladius culiciformis* Sp.lid 12  
GDIP3553-22 ASAP 23 RESL BOLD:ACW5385 *Procladius culiciformis* Sp.lid 12  
GDIP3597-22 ASAP 23 RESL BOLD:ACW5385 *Procladius culiciformis* Sp.lid 12  
GDIP3693-22 ASAP 23 RESL BOLD:ACW5385 *Procladius pectinatus* Sp.lid 12  
GDIP3552-22 ASAP 23 RESL BOLD:ACW5385 *Procladius culiciformis* Sp.lid 12  
GDIP3611-22 ASAP 23 RESL BOLD:ACW5385 *Procladius culiciformis* Sp.lid 12  
GDIP3773-22 ASAP 22 RESL BOLD:AAG3921 *Procladius nigriventris* Sp.lid 69  
GDIP3777-22 ASAP 22 RESL BOLD:AAG3921 *Procladius nigriventris* Sp.lid 69  
GDIP3779-22 ASAP 6 RESL BOLD:AAG5487 *Procladius crassinervis* Sp.lid 27  
GDIP3774-22 ASAP 6 RESL BOLD:AAG5487 *Procladius crassinervis* Sp.lid 27  
GDIP3778-22 ASAP 6 RESL BOLD:AAG5487 *Procladius crassinervis* Sp.lid 27  
GDIP3595-22 ASAP 6 RESL BOLD:AAG5487 *Procladius ferrugineus* Sp.lid 27  
GDIP3596-22 ASAP 6 RESL BOLD:AAG5487 *Acricotopus lucens* Sp.lid 27  
GDIP3649-22 ASAP 6 RESL BOLD:AAG5487 *Procladius crassinervis* Sp.lid 27  
GDIP3661-22 ASAP 6 RESL BOLD:AAG5487 *Procladius ferrugineus* Sp.lid 27  
GDIP3742-22 ASAP 6 RESL BOLD:AAG5487 *Procladius crassinervis* Sp.lid 27  
GDIP3594-22 ASAP 6 RESL BOLD:AAG5487 *Acricotopus lucens* Sp.lid 27  
GDIP3662-22 ASAP 62 RESL BOLD:ADJ7832 *Tanypus punctipennis* Sp.lid 47  
GDIP3707-22 ASAP 62 RESL BOLD:ADJ7832 *Xenopelopia nigricans* Sp.lid 47  
GDIP3752-22 ASAP 11 RESL BOLD:AAW4816 *Ablabesmyia longistyla* Sp.lid 67  
GDIP3726-22 ASAP 72 RESL BOLD:ACZ5961 *Tanypus vilipennis* Sp.lid 65  
GDIP3569-22 ASAP 52 RESL BOLD:ACK3818 *Ablabesmyia phatta* Sp.lid 18  
GDIP3642-22 ASAP 52 RESL BOLD:ACK3818 *Ablabesmyia phatta* Sp.lid 18  
GDIP3592-22 ASAP 57 RESL BOLD:AAF3633 *Ablabesmyia monilis* Sp.lid 25  
GDIP3632-22 ASAP 57 RESL BOLD:AAF3633 *Ablabesmyia monilis* Sp.lid 25  
GDIP3608-22 ASAP 2 RESL BOLD:AAW5657 *Guttipelopia guttipennis* Sp.lid 29  
GDIP3668-22 ASAP 2 RESL BOLD:AAW5657 *Guttipelopia guttipennis* Sp.lid 29  
GDIP3737-22 ASAP 2 RESL BOLD:AAW5657 *Guttipelopia guttipennis* Sp.lid 29  
GDIP3759-22 ASAP 2 RESL BOLD:AAW5657 *Guttipelopia guttipennis* Sp.lid 29  
GDIP3836-22 ASAP 2 RESL BOLD:AAW5657 *Guttipelopia guttipennis* Sp.lid 29  
GDIP3837-22 ASAP 2 RESL BOLD:AAW5657 *Guttipelopia guttipennis* Sp.lid 29

GDIP3837-22 ASAP 2 RESL BOLD:AAW5657 *Guttipelopia guttipennis* Sp.lid 29  
GDIP3599-22 ASAP 2 RESL BOLD:AAW5657 *Guttipelopia guttipennis* Sp.lid 29  
GDIP3615-22 ASAP 2 RESL BOLD:AAW5657 *Guttipelopia guttipennis* Sp.lid 29  
GDIP3629-22 ASAP 2 RESL BOLD:AAW5657 *Guttipelopia guttipennis* Sp.lid 29  
GDIP3633-22 ASAP 2 RESL BOLD:AAW5657 *Guttipelopia guttipennis* Sp.lid 29  
GDIP3660-22 ASAP 2 RESL BOLD:AAW5657 *Guttipelopia guttipennis* Sp.lid 29  
GDIP3709-22 ASAP 69 RESL BOLD:AAG6458 *Pseudosmittia albipennis* Sp.lid 60  
GDIP3738-22 ASAP 3 RESL BOLD:ACP4736 *Smittia terrestris* Sp.lid 34  
GDIP3617-22 ASAP 3 RESL BOLD:ACP4736 *Smittia terrestris* Sp.lid 34  
GDIP3647-22 ASAP 39 RESL BOLD:ADA9118 *Corynoneura coronata* Sp.lid 43  
GDIP3728-22 ASAP 39 RESL BOLD:ADA9118 *Corynoneura coronata* Sp.lid 43  
GDIP3822-22 ASAP 39 RESL BOLD:ADA9118 *Corynoneura coronata* Sp.lid 43  
GDIP3727-22 ASAP 39 RESL BOLD:ADA9118 *Corynoneura coronata* Sp.lid 43  
GDIP3820-22 ASAP 38 RESL BOLD:AAW4942 *Corynoneura gratias* Sp.lid 73  
GDIP3821-22 ASAP 38 RESL BOLD:AAW4942 *Corynoneura gratias* Sp.lid 73  
GDIP3691-22 ASAP 67 RESL BOLD:AAV3048 *Thienemanniella vittata* Sp.lid 55  
GDIP3757-22 ASAP 14 RESL BOLD:ACN9514 *Paraphaenocladus impensus* Sp.lid 68  
GDIP3758-22 ASAP 14 RESL BOLD:ACN9514 *Paraphaenocladus impensus* Sp.lid 68  
GDIP3616-22 ASAP 58 RESL BOLD:ACP4407 *Pseudosmittia obtusa* Sp.lid 33  
GDIP3712-22 ASAP 70 RESL BOLD:ACP7329 *Metriocnemus atriclava* Sp.lid 61  
GDIP3744-22 ASAP 7 RESL BOLD:ACW5117 *Smittia terrestris* Sp.lid 39  
GDIP3630-22 ASAP 7 RESL BOLD:ACW5117 *Smittia terrestris* Sp.lid 39  
GDIP3743-22 ASAP 7 RESL BOLD:ACW5117 *Smittia terrestris* Sp.lid 39  
GDIP3828-22 ASAP 7 RESL BOLD:ACW5117 *Smittia terrestris* Sp.lid 39  
GDIP3827-22 ASAP 7 RESL BOLD:AAM7064 *Smittia terrestris* Sp.lid 39  
GDIP3825-22 ASAP 7 RESL BOLD:AAM7064 *Smittia terrestris* Sp.lid 39  
GDIP3643-22 ASAP 7 RESL BOLD:AAM7064 *Smittia terrestris* Sp.lid 39  
GDIP3690-22 ASAP 66 RESL BOLD:AAV9062 *Cricotopus intersectus* Sp.lid 54  
GDIP3644-22 ASAP 60 RESL BOLD:AAC3042 *Nanocladus dichromus* Sp.lid 42  
GDIP3835-22 ASAP 43 RESL BOLD:AAD8971 *Orthocladus oblidens* Sp.lid 46  
GDIP3658-22 ASAP 43 RESL BOLD:AAD8971 *Orthocladus oblidens* Sp.lid 46  
GDIP3760-22 ASAP 10 RESL BOLD:AAU0273 *Psectrocladius limbatellus* Sp.lid 38  
GDIP3688-22 ASAP 10 RESL BOLD:AAU0273 *Psectrocladius limbatellus* Sp.lid 38  
GDIP3746-22 ASAP 10 RESL BOLD:AAU0273 *Psectrocladius limbatellus* Sp.lid 38  
GDIP3558-22 ASAP 10 RESL BOLD:AAU0273 *Psectrocladius* sp. Sp.lid 38  
GDIP3625-22 ASAP 10 RESL BOLD:AEG1130 *Psectrocladius limbatellus* Sp.lid 38  
GDIP3677-22 ASAP 10 RESL BOLD:AEG1130 *Psectrocladius limbatellus* Sp.lid 38  
GDIP3669-22 ASAP 63 RESL BOLD:AEJ0480 *Psectrocladius oxyura* Sp.lid 50  
GDIP3824-22 ASAP 40 RESL BOLD:ADV7271 *Smittia edwardsi* Sp.lid 74  
GDIP3826-22 ASAP 40 RESL BOLD:ADV7271 *Smittia edwardsi* Sp.lid 74  
GDIP3701-22 ASAP 37 RESL BOLD:AAN5355 *Smittia stercoraria* Sp.lid 57  
GDIP3818-22 ASAP 37 RESL BOLD:AAN5358 *Smittia aterrima* Sp.lid 56  
GDIP3698-22 ASAP 37 RESL BOLD:AAN5358 *Smittia aterrima* Sp.lid 56  
GDIP3656-22 ASAP 13 RESL BOLD:ADV3586 *Metriocnemus* sp. Sp.lid 75  
GDIP3756-22 ASAP 13 RESL BOLD:ADV3586 *Metriocnemus* sp. Sp.lid 75  
GDIP3711-22 ASAP 13 RESL BOLD:ADV3586 *Parachironomus* sp. Sp.lid 75  
GDIP3585-22 ASAP 56 RESL BOLD:AAI6018 *Cricotopus bicinctus* Sp.lid 23

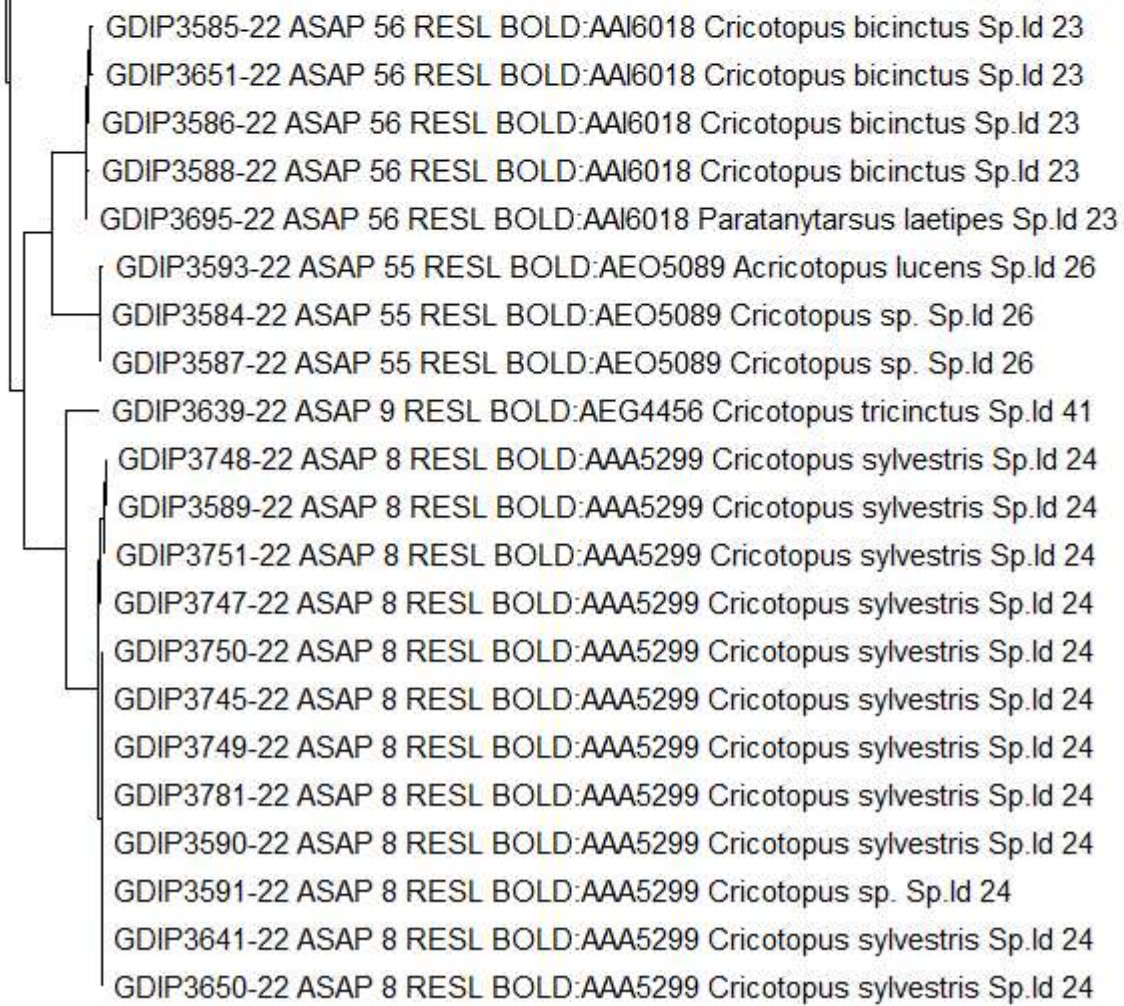

H

0.02
