# Supplementary material for: Facing the infinity: tackling large samples of challenging Chironomidae (Diptera) with an integrative approach
Source: PeerJ journal article supplement (doi:10.7717/peerj.15336), 2023-05-22
Supplement: Supplementary_Data_S3.pdf [file Supplementary_Data_S3.pdf]

# BOLD TaxonID Tree

Title : Tree Result - DS-CHRTR  
Date : 05-Aug-2022  
Data Type : Nucleotide  
Distance Model : Kimura 2 Parameter  
Marker : COI-5P  
Colourization : Barcode Cluster (BIN)

Label : Sample ID  
Label : Identifier  
Label : Identification Method  
Label : Taxon  
Label : Barcode Cluster (BIN)

Filter : length > 200bp only  
Filter : exclude records flagged as misidentifications  
Filter : exclude records with stop codons  
Filter : exclude contaminants

Sequence Count : 19045  
Species count : 1026  
Genus count : 152  
Family count : 1  
Unidentified : 3952

BIN Count : 1613

10 %

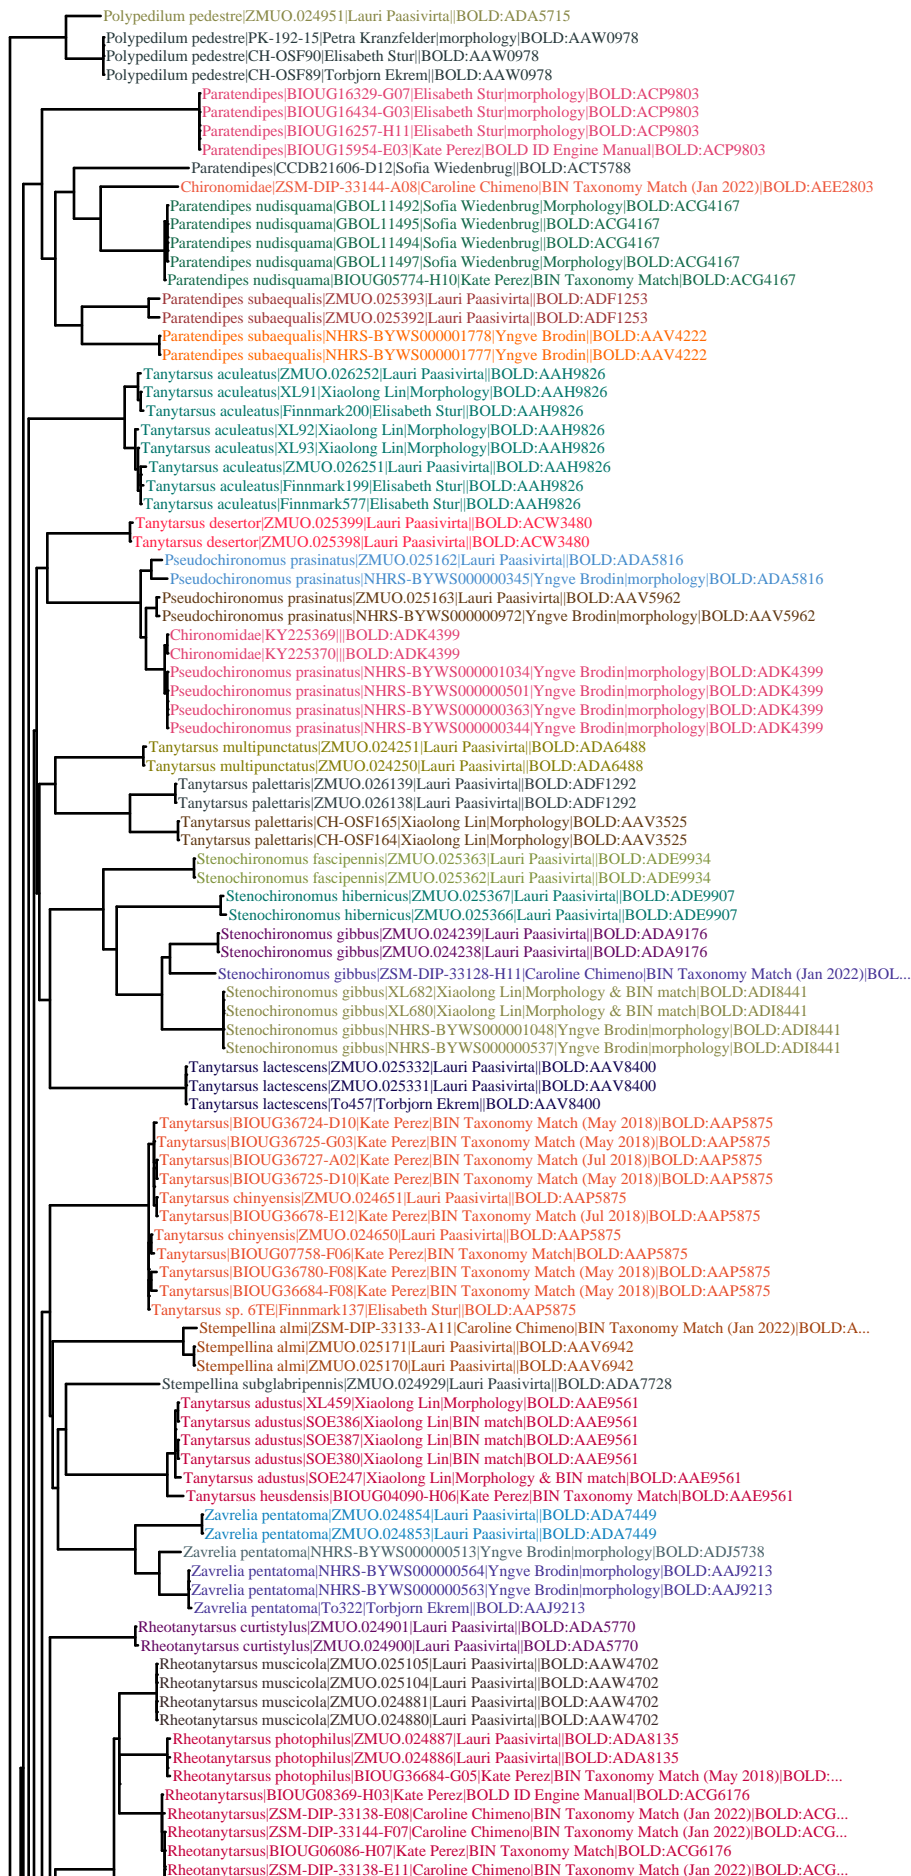

Rheotanytarsus[ZSM-DIP-33144-F07]Caroline Chimenó|BIN Taxonomy Match (Jan 2022)|BOLD:ACG...  
Rheotanytarsus[BIOUG06086-H07]Kate Perez|BIN Taxonomy Match|BOLD:ACG6176  
Rheotanytarsus[ZSM-DIP-33138-E11]Caroline Chimenó|BIN Taxonomy Match (Jan 2022)|BOLD:ACG...  
Rheotanytarsus[BIOUG08174-D11]Kate Perez|BIN Taxonomy Match|BOLD:ACG6176  
Rheotanytarsus pentapoda[ZMUO.024702]Lauri Paasivirta||BOLD:ACL5271  
Rheotanytarsus[BIOUG15952-B08]Kate Perez|BOLD ID Engine Manual|BOLD:ACQ0249  
Rheotanytarsus[BIOUG16258-A01]Kate Perez|BOLD ID Engine Manual|BOLD:ACQ0249  
Rheotanytarsus[BIOUG15967-C12]Kate Perez|BOLD ID Engine Manual|BOLD:ACQ0249  
Rheotanytarsus[BIOUG15951-C02]Kate Perez|BOLD ID Engine Manual|BOLD:ACQ0251  
Rheotanytarsus[BIOUG15966-F11]Kate Perez|BOLD ID Engine Manual|BOLD:ACQ0251  
Rheotanytarsus[BIOUG16329-H11]Kate Perez|BOLD ID Engine Manual|BOLD:ACQ0251  
Rheotanytarsus[BIOUG15967-G10]Kate Perez|BOLD ID Engine Manual|BOLD:ACQ0250  
Rheotanytarsus illiesi|Finmark119|Torbjorn Ekrem||BOLD:AAM9415  
Rheotanytarsus pentapoda[BIOUG16477-B04]Kate Perez|Tree based identification  
Rheotanytarsus pentapoda[TRD-CH409]Elisabeth Sturj|morphology|BOLD:ABZ1633  
Rheotanytarsus pentapoda[EJV-20110147]Lauri Paasivirta||BOLD:ABZ1633  
Rheotanytarsus pentapoda[Finmark720]Elisabeth Sturj|BOLD:ACE3020  
Rheotanytarsus pentapoda[Finmark716]Elisabeth Sturj|BOLD:ACE3020  
Rheotanytarsus pentapoda[Finmark243]Elisabeth Sturj|BOLD:ACE3020  
Rheotanytarsus pentapoda[BIOUG15951-G02]Kate Perez|BIN Taxonomy Match|BOLD:ACE3020  
Rheotanytarsus pentapoda[BIOUG15950-D06]Kate Perez|BIN Taxonomy Match|BOLD:ACE3020  
Rheotanytarsus pentapoda[BIOUG16433-E01]Kate Perez|BIN Taxonomy Match|BOLD:ACE3020  
Rheotanytarsus pentapoda[BIOUG16297-A01]Kate Perez|BIN Taxonomy Match|BOLD:ACE3020  
Rheotanytarsus pentapoda[BIOUG16396-B10]Kate Perez|BIN Taxonomy Match|BOLD:ACE3020  
Rheotanytarsus pentapoda[BIOUG16198-C06]Kate Perez|BIN Taxonomy Match|BOLD:ACE3020  
Rheotanytarsus pentapoda[BIOUG16198-D01]Kate Perez|BIN Taxonomy Match|BOLD:ACE3020  
Rheotanytarsus pentapoda[BIOUG15951-F02]Kate Perez|BIN Taxonomy Match|BOLD:ACE3020  
Rheotanytarsus pentapoda[BIOUG16330-A02]Kate Perez|BIN Taxonomy Match|BOLD:ACE3020  
Rheotanytarsus pentapoda[BIOUG16597-H08]Kate Perez|BIN Taxonomy Match|BOLD:ACE3020  
Rheotanytarsus pentapoda[BIOUG15951-A12]Kate Perez|BIN Taxonomy Match|BOLD:ACE3020  
Rheotanytarsus pentapoda[BIOUG15948-F02]Kate Perez|BIN Taxonomy Match|BOLD:ACE3020  
Rheotanytarsus pentapoda[BIOUG15965-A10]Kate Perez|BIN Taxonomy Match|BOLD:ACE3020  
Rheotanytarsus pentapoda[BIOUG16433-C02]Kate Perez|BIN Taxonomy Match|BOLD:ACE3020  
Rheotanytarsus pentapoda[BIOUG15965-H07]Kate Perez|BIN Taxonomy Match|BOLD:ACE3020  
Rheotanytarsus pentapoda[ZMUO.024703]Lauri Paasivirta||BOLD:AAD5143  
Rheotanytarsus pentapoda[EJV-20110148]Lauri Paasivirta||BOLD:AAD5143  
Rheotanytarsus pentapoda[EJV-20110146]Lauri Paasivirta||BOLD:AAD5143  
Tanytarsus signatus[To83]Xiaolong Lin|Morphology|BOLD:ACG9673  
Tanytarsus signatus[CH-eik75]Elisabeth Sturj|BOLD:ACG9673  
Tanytarsus signatus[CCDB22605-E06]Sofia Wiedenbrug||BOLD:AAW4817  
Tanytarsus signatus[ZSM-DIP-33129-C04]Caroline Chimenó|BIN Taxonomy Match (Jan 2022)|BOLD ...  
Tanytarsus signatus[TRD-CH411]Elisabeth Sturj|morphology|BOLD:AAW4817  
Tanytarsus signatus[TRD-CH389]Elisabeth Sturj|morphology|BOLD:AAW4817  
Tanytarsus signatus[ZMUO.024956]Lauri Paasivirta||BOLD:AAW4817  
Tanytarsus signatus[ZSM-DIP-33129-A06]Caroline Chimenó|BIN Taxonomy Match (Jan 2022)|BOLD ...  
Tanytarsus signatus[BIOUG42666-G03]Kate Perez|BIN Taxonomy Match below Phylum (Jun 2019)|BO...  
Tanytarsus signatus[TRD-CH313]Elisabeth Sturj|BOLD:AAW4817  
Tanytarsus signatus[TRD-CH388]Elisabeth Sturj|morphology|BOLD:AAW4817  
Tanytarsus signatus[EJV-20110150]Lauri Paasivirta||BOLD:AAW4817  
Tanytarsus signatus[ZSM-DIP-33129-B04]Caroline Chimenó|BIN Taxonomy Match (Jan 2022)|BOLD ...  
Tanytarsus signatus[ZSM-DIP-33129-A12]Caroline Chimenó|BIN Taxonomy Match (Jan 2022)|BOLD ...  
Tanytarsus signatus[ZSM-DIP-33129-B06]Caroline Chimenó|BIN Taxonomy Match (Jan 2022)|BOLD ...  
Tanytarsus signatus[EJV-20110151]Lauri Paasivirta||BOLD:AAW4817  
Tanytarsus signatus[EJV-20110152]Lauri Paasivirta||BOLD:AAW4817  
Tanytarsus signatus[EJV-20110149]Lauri Paasivirta||BOLD:AAW4817  
Rheotanytarsus ringei|Finmark183|Torbjorn Ekrem||BOLD:AAF7635  
Rheotanytarsus ringei[BIOUG16256-C08]Kate Perez|BIN Taxonomy Match|BOLD:AAF7635  
Rheotanytarsus ringei[BIOUG16331-D02]Kate Perez|BIN Taxonomy Match|BOLD:AAF7635  
Rheotanytarsus ringei[BIOUG16298-D08]Kate Perez|BIN Taxonomy Match|BOLD:AAF7635  
Rheotanytarsus ringei[BIOUG16333-G07]Kate Perez|BIN Taxonomy Match|BOLD:AAF7635  
Rheotanytarsus ringei[BIOUG16298-H07]Kate Perez|BIN Taxonomy Match|BOLD:AAF7635  
Rheotanytarsus ringei[BIOUG16297-H02]Kate Perez|BIN Taxonomy Match|BOLD:AAF7635  
Rheotanytarsus ringei[BIOUG16257-A12]Kate Perez|BIN Taxonomy Match|BOLD:AAF7635  
Rheotanytarsus ringei[BIOUG16333-E11]Kate Perez|BIN Taxonomy Match|BOLD:AAF7635  
Rheotanytarsus ringei[BIOUG16331-E08]Kate Perez|BIN Taxonomy Match|BOLD:AAF7635  
Rheotanytarsus ringei[BIOUG15950-D10]Kate Perez|BIN Taxonomy Match|BOLD:AAF7635  
Rheotanytarsus ringei[BIOUG15905-A04]Kate Perez|BIN Taxonomy Match|BOLD:AAF7635  
Rheotanytarsus ringei[EJV-20110132]Lauri Paasivirta||BOLD:AAF7635  
Rheotanytarsus ringei[EJV-20110131]Lauri Paasivirta||BOLD:AAF7635  
Rheotanytarsus ringei[BIOUG16261-B06]Kate Perez|BIN Taxonomy Match|BOLD:AAF7635  
Rheotanytarsus ringei[BIOUG16328-G07]Kate Perez|BIN Taxonomy Match|BOLD:AAF7635  
Rheotanytarsus ringei[BIOUG16297-B11]Kate Perez|BIN Taxonomy Match|BOLD:AAF7635  
Rheotanytarsus ringei[BIOUG16432-D11]Kate Perez|BIN Taxonomy Match|BOLD:AAF7635  
Rheotanytarsus ringei[BIOUG16328-C03]Kate Perez|BIN Taxonomy Match|BOLD:AAF7635  
Rheotanytarsus ringei[BIOUG16299-B03]Kate Perez|BIN Taxonomy Match|BOLD:AAF7635  
Rheotanytarsus ringei[BIOUG16396-B12]Kate Perez|BIN Taxonomy Match|BOLD:AAF7635  
Rheotanytarsus ringei[BIOUG16296-H04]Kate Perez|BIN Taxonomy Match|BOLD:AAF7635  
Rheotanytarsus ringei[BIOUG16296-C08]Kate Perez|BIN Taxonomy Match|BOLD:AAF7635  
Rheotanytarsus ringei[BIOUG16259-A02]Kate Perez|BIN Taxonomy Match|BOLD:AAF7635  
Rheotanytarsus ringei[BIOUG15948-A07]Kate Perez|BIN Taxonomy Match|BOLD:AAF7635  
Rheotanytarsus ringei[TRD-CH175]Elisabeth Sturj|BOLD:AAF7635  
Rheotanytarsus ringei[BIOUG16329-F05]Kate Perez|BIN Taxonomy Match|BOLD:AAF7635  
Rheotanytarsus ringei[BIOUG16329-G06]Kate Perez|BIN Taxonomy Match|BOLD:AAF7635  
Rheotanytarsus ringei[BIOUG16329-C11]Kate Perez|BIN Taxonomy Match|BOLD:AAF7635  
Rheotanytarsus ringei[BIOUG15963-E07]Kate Perez|BIN Taxonomy Match|BOLD:AAF7635  
Rheotanytarsus ringei[BIOUG16261-A10]Kate Perez|BIN Taxonomy Match|BOLD:AAF7635  
Rheotanytarsus ringei[BIOUG16298-B09]Kate Perez|BIN Taxonomy Match|BOLD:AAF7635  
Rheotanytarsus ringei[BIOUG16296-D10]Kate Perez|BIN Taxonomy Match|BOLD:AAF7635  
Rheotanytarsus ringei[BIOUG16257-F11]Kate Perez|BIN Taxonomy Match|BOLD:AAF7635  
Rheotanytarsus ringei[BIOUG16330-B11]Kate Perez|BIN Taxonomy Match|BOLD:AAF7635  
Rheotanytarsus ringei[BIOUG16332-D06]Kate Perez|BIN Taxonomy Match|BOLD:AAF7635  
Rheotanytarsus ringei[BIOUG16333-C09]Kate Perez|BIN Taxonomy Match|BOLD:AAF7635  
Rheotanytarsus ringei[BIOUG16258-D01]Kate Perez|BIN Taxonomy Match|BOLD:AAF7635  
Rheotanytarsus ringei[BIOUG16198-E09]Kate Perez|BIN Taxonomy Match|BOLD:AAF7635  
Rheotanytarsus ringei[BIOUG16331-F06]Kate Perez|BIN Taxonomy Match|BOLD:AAF7635  
Rheotanytarsus ringei[BIOUG16261-E12]Kate Perez|BIN Taxonomy Match|BOLD:AAF7635  
Rheotanytarsus ringei[BIOUG15905-H03]Kate Perez|BIN Taxonomy Match|BOLD:AAF7635  
Rheotanytarsus ringei[BIOUG16328-A12]Kate Perez|BIN Taxonomy Match|BOLD:AAF7635  
Rheotanytarsus ringei[BIOUG15964-G07]Kate Perez|BIN Taxonomy Match|BOLD:AAF7635  
Rheotanytarsus ringei[BIOUG16298-E04]Kate Perez|BIN Taxonomy Match|BOLD:AAF7635  
Rheotanytarsus ringei[BIOUG16328-E08]Kate Perez|BIN Taxonomy Match|BOLD:AAF7635  
Rheotanytarsus ringei[BIOUG16299-C02]Kate Perez|BIN Taxonomy Match|BOLD:AAF7635  
Rheotanytarsus ringei[BIOUG16260-F06]Kate Perez|BIN Taxonomy Match|BOLD:AAF7635





Tanytarsus brundini|TRD-CH240|Elisabeth Stur|BOLD: AAP5616  
 Tanytarsus brundini|TRD-CH243|Elisabeth Stur|BOLD: AAP5616  
 Tanytarsus brundini|TRD-CH336|Elisabeth Stur|morphology|BOLD: AAP5616  
 Tanytarsus brundini|TRD-CH225|Elisabeth Stur|BOLD: AAP5616  
 Tanytarsus brundini|TRD-CH238|Elisabeth Stur|BOLD: AAP5616  
 Tanytarsus brundini|TRD-CH335|Elisabeth Stur|morphology|BOLD: AAP5616  
 Tanytarsus brundini|NHRS-BYWS00000407|Yngve Brodin|morphology|BOLD: AAP5616  
 Tanytarsus brundini|NHRS-BYWS000001093|Yngve Brodin|morphology|BOLD: AAP5616  
 Tanytarsus brundini|TRD-CH189|Elisabeth Stur|BOLD: AAP5616  
 Tanytarsus brundini|BIOUG16477-B12|Kate Perez|BIN Taxonomy Match|BOLD: AAP5616  
 Tanytarsus brundini|BIOUG16476-H09|Kate Perez|BIN Taxonomy Match|BOLD: AAP5616  
 Tanytarsus brundini|TRD-CH137|Elisabeth Stur|morphology|BOLD: AAP5616  
**Tanytarsus brundini|Finmark240|Torbjorn Ekrem|BOLD: ACQ8983**  
 Tanytarsus brundini|BIOUG16434-E06|Elisabeth Stur|BOLD ID Engine Manual|BOLD: ACQ8985  
 Tanytarsus brundini|BIOUG16430-E08|Elisabeth Stur|BOLD ID Engine Manual|BOLD: ACQ8985  
 Tanytarsus brundini|BIOUG16480-D07|Elisabeth Stur|BOLD ID Engine Manual|BOLD: ACQ8985  
 Tanytarsus brundini|BIOUG16332-E11|Elisabeth Stur|BOLD ID Engine Manual|BOLD: ACQ8985  
 Tanytarsus brundini|ZSM-DIP-33135-G09|Caroline Chimento|BIN Taxonomy Match (Jan 2022)|BOLD ...  
 Tanytarsus brundini|ZSM-DIP-33142-G09|Caroline Chimento|BIN Taxonomy Match (Jan 2022)|BOLD ...  
 Tanytarsus brundini|ZSM-DIP-33134-G09|Caroline Chimento|BIN Taxonomy Match (Jan 2022)|BOLD ...  
 Tanytarsus brundini|XL148|Xiaolong Lin|Morphology|BOLD: AAP5616  
 Tanytarsus brundini|NHRS-BYWS000001134|Yngve Brodin|morphology|BOLD: AAP5616  
 Tanytarsus brundini|NHRS-BYWS000000920|Yngve Brodin|morphology|BOLD: AAP5616  
 Tanytarsus brundini|BIOUG16435-H08|Kate Perez|BIN Taxonomy Match|BOLD: AAP5616  
 Tanytarsus brundini|BIOUG16432-G03|Kate Perez|BIN Taxonomy Match|BOLD: AAP5616  
 Tanytarsus brundini|TRD-CH399|Elisabeth Stur|morphology|BOLD: AAP5616  
 Tanytarsus brundini|BIOUG16479-A06|Kate Perez|BIN Taxonomy Match|BOLD: AAP5616  
 Tanytarsus brundini|BIOUG16426-F11|Kate Perez|BIN Taxonomy Match|BOLD: AAP5616  
 Tanytarsus brundini|CH-OSF103|Elisabeth Stur|BOLD: AAP5616  
 Tanytarsus brundini|ZSM-DIP-33142-A04|Caroline Chimento|BIN Taxonomy Match (Jan 2022)|BOLD ...  
 Tanytarsus brundini|BIOUG16436-C01|Kate Perez|BIN Taxonomy Match|BOLD: AAP5616  
 Tanytarsus brundini|TRD-CH405|Elisabeth Stur|morphology|BOLD: AAP5616  
 Tanytarsus brundini|BIOUG16431-F01|Kate Perez|BIN Taxonomy Match|BOLD: AAP5616  
 Tanytarsus brundini|TRD-CH381|Elisabeth Stur|morphology|BOLD: ACQ8984  
 Tanytarsus brundini|BIOUG16432-F03|Elisabeth Stur|BOLD ID Engine Manual|BOLD: ACQ8984  
 Tanytarsus brundini|BIOUG16433-B01|Elisabeth Stur|BOLD ID Engine Manual|BOLD: ACQ8984  
 Tanytarsus brundini|BIOUG16435-D06|Elisabeth Stur|BOLD ID Engine Manual|BOLD: ACQ8984  
 Tanytarsus brundini|BIOUG16205-D03|Elisabeth Stur|BOLD ID Engine Manual|BOLD: ACQ8984  
 Tanytarsus brundini|BIOUG16476-E04|Kate Perez|BIN Taxonomy Match|BOLD: AAP5616  
 Tanytarsus brundini|ZSM-DIP-33135-G10|Caroline Chimento|BIN Taxonomy Match (Jan 2022)|BOLD ...  
 Tanytarsus brundini|Finmark239|Torbjorn Ekrem|BOLD: AAP5616  
 Tanytarsus brundini|NHRS-BYWS000000432|Yngve Brodin|morphology|BOLD: AAP5616  
 Tanytarsus brundini|To137|Torbjorn Ekrem|Morphology|BOLD: AAP5616  
 Tanytarsus brundini|BIOUG16436-C08|Elisabeth Stur|Tree based identification  
 Tanytarsus brundini|BIOUG16396-E01|Elisabeth Stur|BOLD ID Engine Manual|BOLD: ACR0797  
**Tanytarsus brundini|EJV-20110143|Lauri Paasivirta|BOLD: ACQ9072**  
 Tanytarsus brundini|ZMUO.024782|Lauri Paasivirta|BOLD: AAP5616  
 Tanytarsus brundini|NHRS-BYWS000000158|Yngve Brodin|morphology|BOLD: AAP5616  
 Tanytarsus brundini|NHRS-BYWS000000159|Yngve Brodin|morphology|BOLD: AAP5616  
 Tanytarsus brundini|ZMUO.024783|Lauri Paasivirta|BOLD: AAP5616  
 Tanytarsus brundini|EJV-20110140|Lauri Paasivirta|BOLD: AAP5616  
 Tanytarsus brundini|EJV-20110142|Lauri Paasivirta|BOLD: AAP5616  
 Tanytarsus brundini|EJV-20110141|Lauri Paasivirta|BOLD: AAP5616  
 Chironomidae|BIOUG36753-B02|Meredith Miller|Tree-based Identification (Jan 2019)|BOLD: AD...  
 Stempellina bausei|Finmark760|G. A. Halvorsen|BOLD: ACD1924  
 Stempellina bausei|SOE92|Torbjorn Ekrem  
 Stempellina bausei|SOE173|Elisabeth Stur|BOLD: AAD0308  
 Stempellina bausei|SOE25|Elisabeth Stur|BOLD: AAD0308  
 Stempellina bausei|SOE249|Elisabeth Stur|BOLD: AAD0309  
 Stempellina bausei|NO17|Torbjorn Ekrem|BOLD: AAD0309  
 Stempellina bausei|SOE391|Torbjorn Ekrem|BOLD: AAD0309  
 Stempellina bausei|To71|Torbjorn Ekrem|BOLD: AAD0309  
 Stempellina bausei|ZMUO.024914|Lauri Paasivirta|BOLD: AAD0309  
 Stempellina bausei|NHRS-BYWS000001128|Yngve Brodin|morphology|BOLD: AAD0309  
 Stempellina bausei|SOE389|Torbjorn Ekrem|BOLD: AAD0309  
 Stempellina bausei|ZMUO.024915|Lauri Paasivirta|BOLD: AAD0309  
 Stempellina bausei|NO16|Torbjorn Ekrem|BOLD: AAD0309  
 Stempellina bausei|TRD-CH334|Elisabeth Stur|morphology|BOLD: AAD0309  
 Stempellina bausei|NO 84|Elisabeth Stur|BOLD: AAD0309  
 Stempellinella flavidula|ZMUO.026235|Lauri Paasivirta|BOLD: ADF1889  
 Stempellinella brevis|BIOUG06274-H10|Kate Perez|BIN Taxonomy Match|BOLD: AAF3516  
 Stempellinella brevis|BIOUG05483-E11|Kate Perez|BIN Taxonomy Match|BOLD: AAF3516  
 Stempellinella brevis|BIOUG06056-H04|Kate Perez|BIN Taxonomy Match|BOLD: AAF3516  
 Stempellinella brevis|BIOUG05396-G05|Kate Perez|BIN Taxonomy Match|BOLD: AAF3516  
 Stempellinella brevis|BIOUG06055-G07|Kate Perez|BIN Taxonomy Match|BOLD: AAF3516  
 Stempellinella brevis|BIOUG05484-E05|Kate Perez|BIN Taxonomy Match|BOLD: AAF3516  
 Stempellinella brevis|BIOUG05777-B08|Kate Perez|BIN Taxonomy Match|BOLD: AAF3516  
 Stempellinella brevis|BIOUG06054-E02|Kate Perez|BIN Taxonomy Match|BOLD: AAF3516  
 Stempellinella brevis|To67|Torbjorn Ekrem|BOLD: AAF3516  
 Stempellinella brevis|To52|Torbjorn Ekrem|BOLD: AAF3516  
 Stempellinella brevis|CH-eik93|Elisabeth Stur|BOLD: AAF3516  
 Stempellinella brevis|ATNA571|Elisabeth Stur|BOLD: AAF3516  
 Stempellinella brevis|BIOUG05778-E08|Kate Perez|BIN Taxonomy Match|BOLD: AAF3516  
 Stempellinella brevis|ZMUO.024772|Lauri Paasivirta|BOLD: AAF3516  
 Stempellinella brevis|ZMUO.024771|Lauri Paasivirta|BOLD: AAF3516  
 Stempellinella brevis|Finmark718|Elisabeth Stur|BOLD: AAF3516  
 Stempellinella brevis|Finmark118|Elisabeth Stur|BOLD: AAF3516  
 Stempellinella brevis|To59|Torbjorn Ekrem|BOLD: AAF3516  
 Stempellinella brevis|Finmark595|Elisabeth Stur|BOLD: AAF3516  
 Chironomidae|CCDB24229-H01|Jerome Moriniere|BIN Taxonomy Match|BOLD: ACU4730  
 Chironomidae|CCDB24229-B06|Jerome Moriniere|BIN Taxonomy Match|BOLD: ACU4730  
 Chironomidae|CCDB24229-B05|Jerome Moriniere|BIN Taxonomy Match|BOLD: ACU4730  
 Chironomidae|CCDB24229-B04|Jerome Moriniere|BIN Taxonomy Match|BOLD: ACU4730  
 Chironomidae|CCDB24229-B03|Jerome Moriniere|BIN Taxonomy Match|BOLD: ACU4730  
 Chironomidae|BIOUG16900-C04|Jerome Moriniere|BIN Taxonomy Match|BOLD: ACR1089  
 Chironomidae|BIOUG17262-C12|Jerome Moriniere|BIN Taxonomy Match|BOLD: ACR1089  
 Chironomidae|BIOUG16996-A02|Jerome Moriniere|BIN Taxonomy Match|BOLD: ACR1089  
 Cladotanytarsus cyrylae|PP0258|Lauri Paasivirta|BOLD: AAV9225  
 Cladotanytarsus cyrylae|ZSM-DIP-33133-G10|Caroline Chimento|BIN Taxonomy Match (Jan 2022)|BOL...  
 Cladotanytarsus cyrylae|To462|Torbjorn Ekrem|BOLD: AAV9225  
 Tanytarsus volgensis|ZMUO.025187|Lauri Paasivirta|BOLD: AAD2169  
 Tanytarsus volgensis|ZMUO.025186|Lauri Paasivirta|BOLD: AAD2169  
 Tanytarsus volgensis|BIOUG36987-D03|Kate Perez|BIN Taxonomy Match (Jul 2018)|BOLD: AAD2169

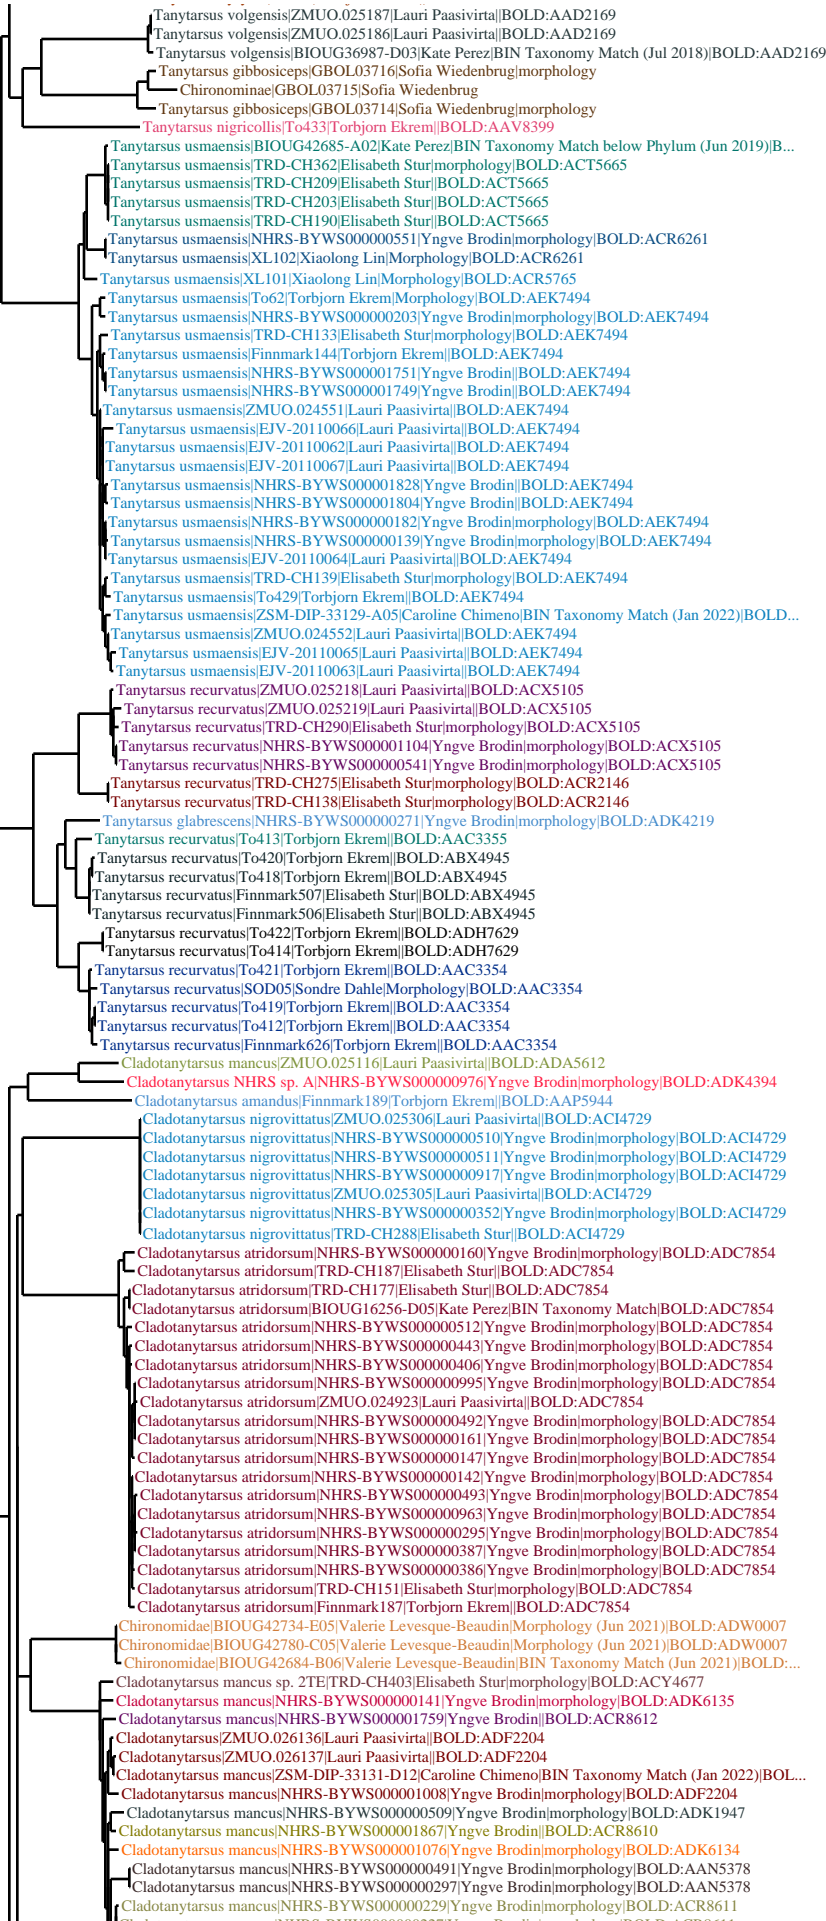

Cladotanytarsus mancus|NHRS-BYWS00000297|Yngve Brodin|morphology|BOLD:AA5378  
 Cladotanytarsus mancus|NHRS-BYWS00000229|Yngve Brodin|morphology|BOLD:ACR8611  
 Cladotanytarsus mancus|NHRS-BYWS00000227|Yngve Brodin|morphology|BOLD:ACR8611  
 Cladotanytarsus mancus|NHRS-BYWS00000467|Yngve Brodin|morphology|BOLD:ACR8611  
 Cladotanytarsus mancus sp. 2TE|Finmark736|Torbjorn Ekrem|BOLD:ACR8611  
 Cladotanytarsus mancus|ZMUO.025117|Lauri Paasivirta|BOLD:ACR8611  
 Cladotanytarsus mancus|NHRS-BYWS000001182|Yngve Brodin|morphology|BOLD:ACR8611  
 Cladotanytarsus mancus|NHRS-BYWS000001866|Yngve Brodin|BOLD:ACR8611  
 Cladotanytarsus mancus|ZSM-DIP-33134-E10|Caroline Chimenò|BIN Taxonomy Match (Jan 2022)|BOL...  
 Cladotanytarsus mancus|NHRS-BYWS00000230|Yngve Brodin|morphology|BOLD:ACR8609  
 Cladotanytarsus mancus|NHRS-BYWS000001801|Yngve Brodin|BOLD:ACR8609  
 Cladotanytarsus mancus|NHRS-BYWS000001758|Yngve Brodin|BOLD:ACR8609  
 Cladotanytarsus mancus|NHRS-BYWS000001757|Yngve Brodin|BOLD:ACR8609  
 Cladotanytarsus mancus|NHRS-BYWS00000202|Yngve Brodin|morphology|BOLD:ACR8609  
 Cladotanytarsus mancus|ZMUO.024925|Lauri Paasivirta|BOLD:ACR8609  
 Cladotanytarsus mancus-agg.|EJV-20110112|Lauri Paasivirta|BOLD:ACR8609  
 Cladotanytarsus gedanicus|ZMUO.025355|Lauri Paasivirta|BOLD:AAV9224  
 Cladotanytarsus gedanicus|NHRS-BYWS00000306|Yngve Brodin|morphology|BOLD:AAV9224  
 Cladotanytarsus gedanicus|NHRS-BYWS00000463|Yngve Brodin|morphology|BOLD:AAV9224  
 Cladotanytarsus gedanicus|NHRS-BYWS00000571|Yngve Brodin|morphology|BOLD:AAV9224  
 Cladotanytarsus gedanicus|NHRS-BYWS00000994|Yngve Brodin|morphology|BOLD:AAV9224  
 Cladotanytarsus gedanicus|NHRS-BYWS00000957|Yngve Brodin|morphology|BOLD:AAV9224  
 Cladotanytarsus gedanicus|NHRS-BYWS00000394|Yngve Brodin|morphology|BOLD:AAV9224  
 Cladotanytarsus gedanicus|NHRS-BYWS00000466|Yngve Brodin|morphology|BOLD:AAV9224  
 Cladotanytarsus gedanicus|NHRS-BYWS00000390|Yngve Brodin|morphology|BOLD:AAV9224  
 Cladotanytarsus gedanicus|NHRS-BYWS00000358|Yngve Brodin|morphology|BOLD:AAV9224  
 Cladotanytarsus gedanicus|NHRS-BYWS00000357|Yngve Brodin|morphology|BOLD:AAV9224  
 Cladotanytarsus gedanicus|NHRS-BYWS00000389|Yngve Brodin|morphology|BOLD:AAV9224  
 Cladotanytarsus gedanicus|To450|Torbjorn Ekrem|BOLD:AAV9224  
 Cladotanytarsus weixionensis|NHRS-BYWS00000533|Yngve Brodin|morphology|BOLD:ACZ8808  
 Cladotanytarsus bicornutus|ZMUO.025217|Lauri Paasivirta|BOLD:ACZ8808  
 Cladotanytarsus bicornutus|ZMUO.025216|Lauri Paasivirta|BOLD:ACZ8808  
 Cladotanytarsus weixionensis|NHRS-BYWS00000257|Yngve Brodin|morphology|BOLD:ACZ8808  
 Cladotanytarsus teres|ZMUO.024667|Lauri Paasivirta|BOLD:ADA7765  
 Cladotanytarsus molestus|PP0263|Lauri Paasivirta|BOLD:ADA7765  
 Cladotanytarsus pallidus|TRD-CH294|Elisabeth Stur|BOLD:AAR9373  
 Cladotanytarsus iucundus|NHRS-BYWS000001107|Yngve Brodin|morphology|BOLD:AAR9373  
 Cladotanytarsus iucundus|NHRS-BYWS00000307|Yngve Brodin|morphology|BOLD:AAR9373  
 Cladotanytarsus|BIOUG36737-C04|Kate Perez|BIN Taxonomy Match (May 2018)|BOLD:AAR9373  
 Cladotanytarsus|BIOUG55147-E01|Kate Perez|BIN Taxonomy Match (Oct 2020)|BOLD:AAR9373  
 Cladotanytarsus|BIOUG55118-B11|Kate Perez|BIN Taxonomy Match (Oct 2020)|BOLD:AAR9373  
 Cladotanytarsus iucundus|NHRS-BYWS000001021|Yngve Brodin|morphology|BOLD:AAR9373  
 Cladotanytarsus|ZSM-DIP-33129-A07|Caroline Chimenò|BIN Taxonomy Match (Jan 2022)|BOLD:AA...  
 Cladotanytarsus iucundus|NHRS-BYWS000001086|Yngve Brodin|morphology|BOLD:AAR9373  
 Cladotanytarsus iucundus|NHRS-BYWS000001811|Yngve Brodin|morphology|BOLD:AAR9373  
 Cladotanytarsus iucundus|NHRS-BYWS00000180|Yngve Brodin|morphology|BOLD:AAR9373  
 Cladotanytarsus iucundus|NHRS-BYWS00000140|Yngve Brodin|morphology|BOLD:AAR9373  
 Cladotanytarsus pallidus|To02|Torbjorn Ekrem|BOLD:AAR9373  
 Cladotanytarsus mancus sp. 3TE|Finmark708|Torbjorn Ekrem|BOLD:AAJ1096  
 Cladotanytarsus mancus sp. 3TE|Finmark706|Torbjorn Ekrem|BOLD:AAJ1096  
 Cladotanytarsus mancus sp. 3TE|Finmark686|Torbjorn Ekrem|BOLD:AAJ1096  
 Cladotanytarsus mancus sp. 3TE|Finmark623|Torbjorn Ekrem|BOLD:AAJ1096  
 Cladotanytarsus nr. lepidocalcar|ZMUO.025343|Lauri Paasivirta|BOLD:AAJ1096  
 Cladotanytarsus mancus|ZMUO.024926|Lauri Paasivirta|BOLD:AAJ1096  
 Cladotanytarsus mancus sp. 3TE|To81|Torbjorn Ekrem|BOLD:AAJ1096  
 Cladotanytarsus mancus sp. 3TE|Finmark621|Torbjorn Ekrem|morphology|BOLD:AAJ1096  
 Cladotanytarsus difficilis|NHRS-BYWS000001106|Yngve Brodin|morphology|BOLD:AAQ2211  
 Cladotanytarsus difficilis|NHRS-BYWS00000366|Yngve Brodin|morphology|BOLD:AAQ2211  
 Cladotanytarsus difficilis|ZMUO.025130|Lauri Paasivirta|BOLD:AAQ2211  
 Cladotanytarsus difficilis|ZMUO.025131|Lauri Paasivirta|BOLD:AAQ2211  
 Cladotanytarsus difficilis|NHRS-BYWS000001852|Yngve Brodin|BOLD:AAQ2211  
 Cladotanytarsus difficilis|Finmark594|Torbjorn Ekrem|BOLD:AAQ2211  
 Cladotanytarsus nr. vanderwulpi|ZMUO.025113|Lauri Paasivirta|BOLD:ADA7665  
 Cladotanytarsus nr. vanderwulpi|ZMUO.025112|Lauri Paasivirta|BOLD:ADA7665  
 Cladotanytarsus vanderwulpi|ZMUO.025223|Lauri Paasivirta|BOLD:ADA3644  
 Cladotanytarsus vanderwulpi|ZMUO.025222|Lauri Paasivirta|BOLD:ADA3644  
 Tanytarsus sp. 5TE|NO 80|Xiaolong Lin|morphology|BOLD:ACE7742  
 Cladotanytarsus|ZSM-DIP-33146-F05|Caroline Chimenò|BIN Taxonomy Match (Jan 2022)|BOLD:AC...  
 Cladotanytarsus vanderwulpi|Finmark184|Torbjorn Ekrem|BOLD:AAP5943  
 Tanytarsus verralli|ZMUO.024758|Lauri Paasivirta|BOLD:ADA6495  
 Tanytarsus innarensis|ZMUO.025273|Lauri Paasivirta|BOLD:ACE7740  
 Tanytarsus innarensis|ZMUO.025274|Lauri Paasivirta|BOLD:ACE7740  
 Tanytarsus innarensis|NO 79|Elisabeth Stur|BOLD:ACE7740  
 Tanytarsus debilis|TRD-CH222|Elisabeth Stur|BOLD:AAV7044  
 Tanytarsus debilis|ZMUO.024935|Lauri Paasivirta|BOLD:AAV7044  
 Tanytarsus debilis|ZSM34343-D09|Sofia Wiedenbrug|Morphology|BOLD:AAV7044  
 Tanytarsus debilis|Finmark450|Elisabeth Stur|BOLD:AAV7044  
 Tanytarsus debilis|Finmark441|Elisabeth Stur|BOLD:AAV7043  
 Tanytarsus nemorosus|ZMUO.024269|Lauri Paasivirta|BOLD:ADA6297  
 Tanytarsus nemorosus|ZMUO.024861|Lauri Paasivirta|BOLD:ADA6297  
 Tanytarsus nemorosus|ZMUO.024860|Lauri Paasivirta|BOLD:ADA6297  
 Tanytarsus nemorosus|ZMUO.024270|Lauri Paasivirta|BOLD:ADA6297  
 Tanytarsus nemorosus|Finmark864|Elisabeth Stur|morphology|BOLD:AAV3524  
 Tanytarsus nemorosus|Finmark867|Elisabeth Stur|morphology|BOLD:AAV3524  
 Tanytarsus nemorosus|Finmark863|Elisabeth Stur|morphology|BOLD:AAV3524  
 Tanytarsus nemorosus|Finmark684|Elisabeth Stur|BOLD:AAV3524  
 Tanytarsus nemorosus|Finmark427|Torbjorn Ekrem|BOLD:AAV3524  
 Chironomidae|BIOUG42667-G08|Valerie Levesque-Beaudin|Morphology (Jun 2021)|BOLD:ADW3052  
 Neozavrelia cuneipennis|To331|Torbjorn Ekrem|BOLD:AAG5550  
 Tanytarsus verralli|NHRS-BYWS00000413|Yngve Brodin|morphology|BOLD:ADK1446  
 Tanytarsus verralli|NHRS-BYWS00000552|Yngve Brodin|morphology|BOLD:ADK1445  
 Tanytarsus verralli|ZMUO.025232|Lauri Paasivirta|BOLD:ADA4951  
 Tanytarsus verralli|NHRS-BYWS00000381|Yngve Brodin|morphology|BOLD:ACB9674  
 Tanytarsus verralli|NHRS-BYWS00000382|Yngve Brodin|morphology|BOLD:ACB9674  
 Tanytarsus verralli|ZMUO.025233|Lauri Paasivirta|BOLD:ADA4952  
 Tanytarsus verralli|NHRS-BYWS00000355|Yngve Brodin|morphology|BOLD:AAQ0622  
 Tanytarsus verralli|To453|W. Gilka|BOLD:AAV8406  
 Tanytarsus verralli|To452|Torbjorn Ekrem|BOLD:AAV8406  
 Tanytarsus glabrescens|PP0274|Lauri Paasivirta|BOLD:ADZ0237  
 Micropsectra radialis|EBAI-Ch178|Elisabeth Stur|morphology  
 Micropsectra radialis|ATNA44|Elisabeth Stur|BOLD:AAA9787  
 Micropsectra radialis|To37|Torbjorn Ekrem|BOLD:AAA9787



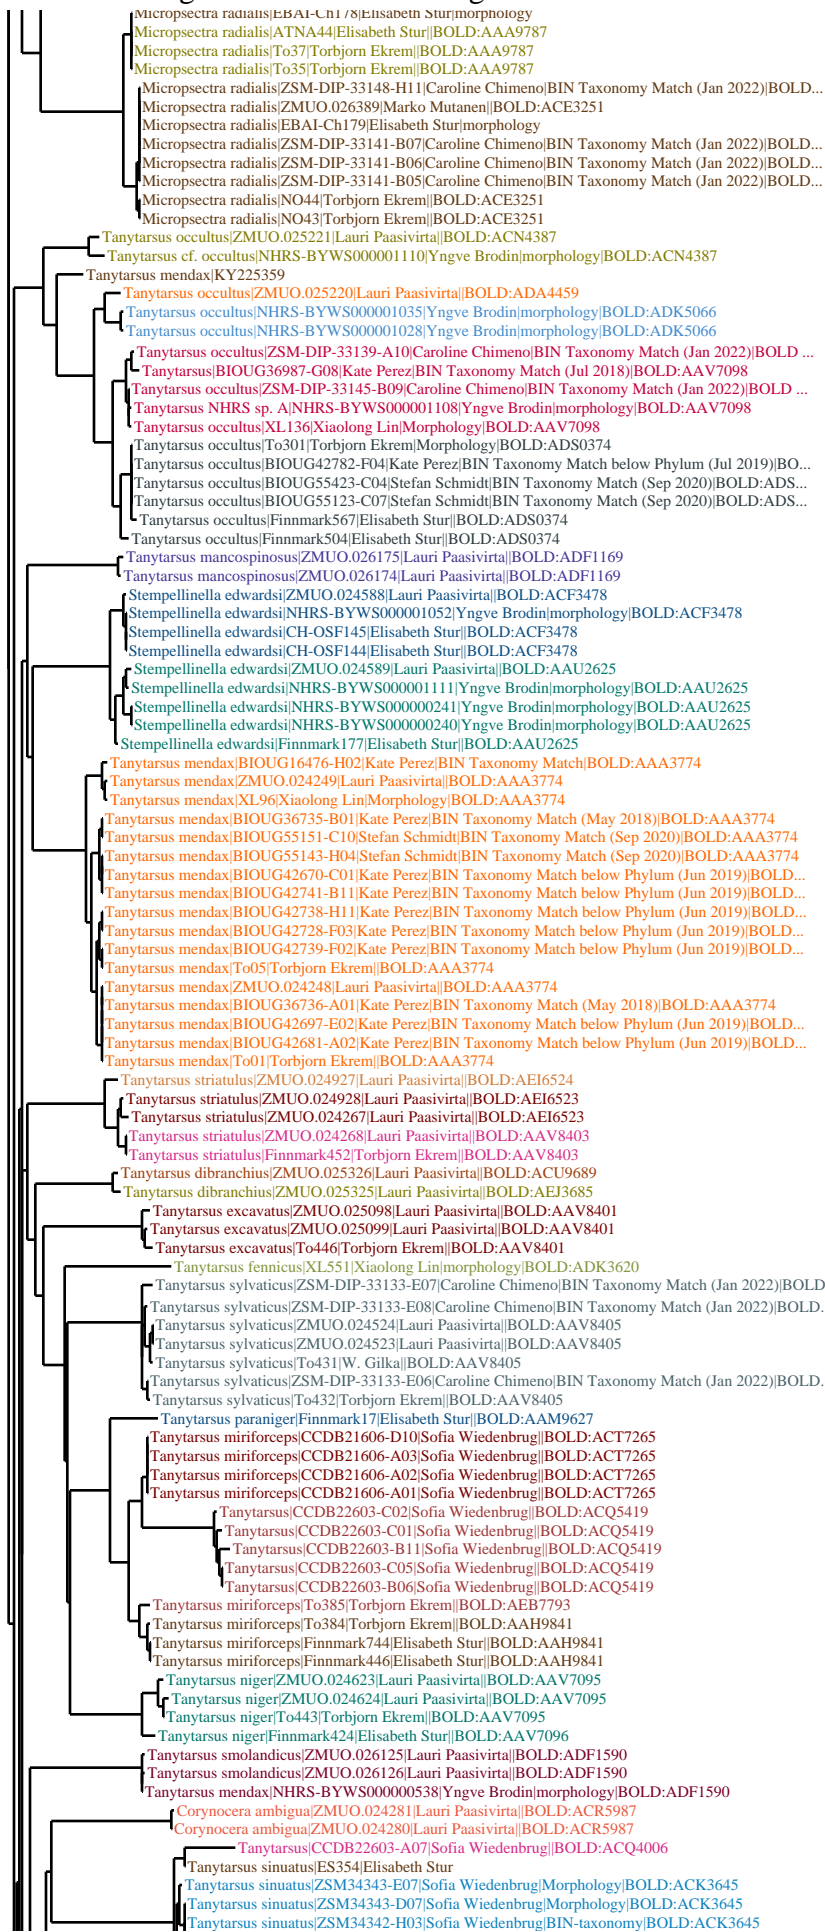

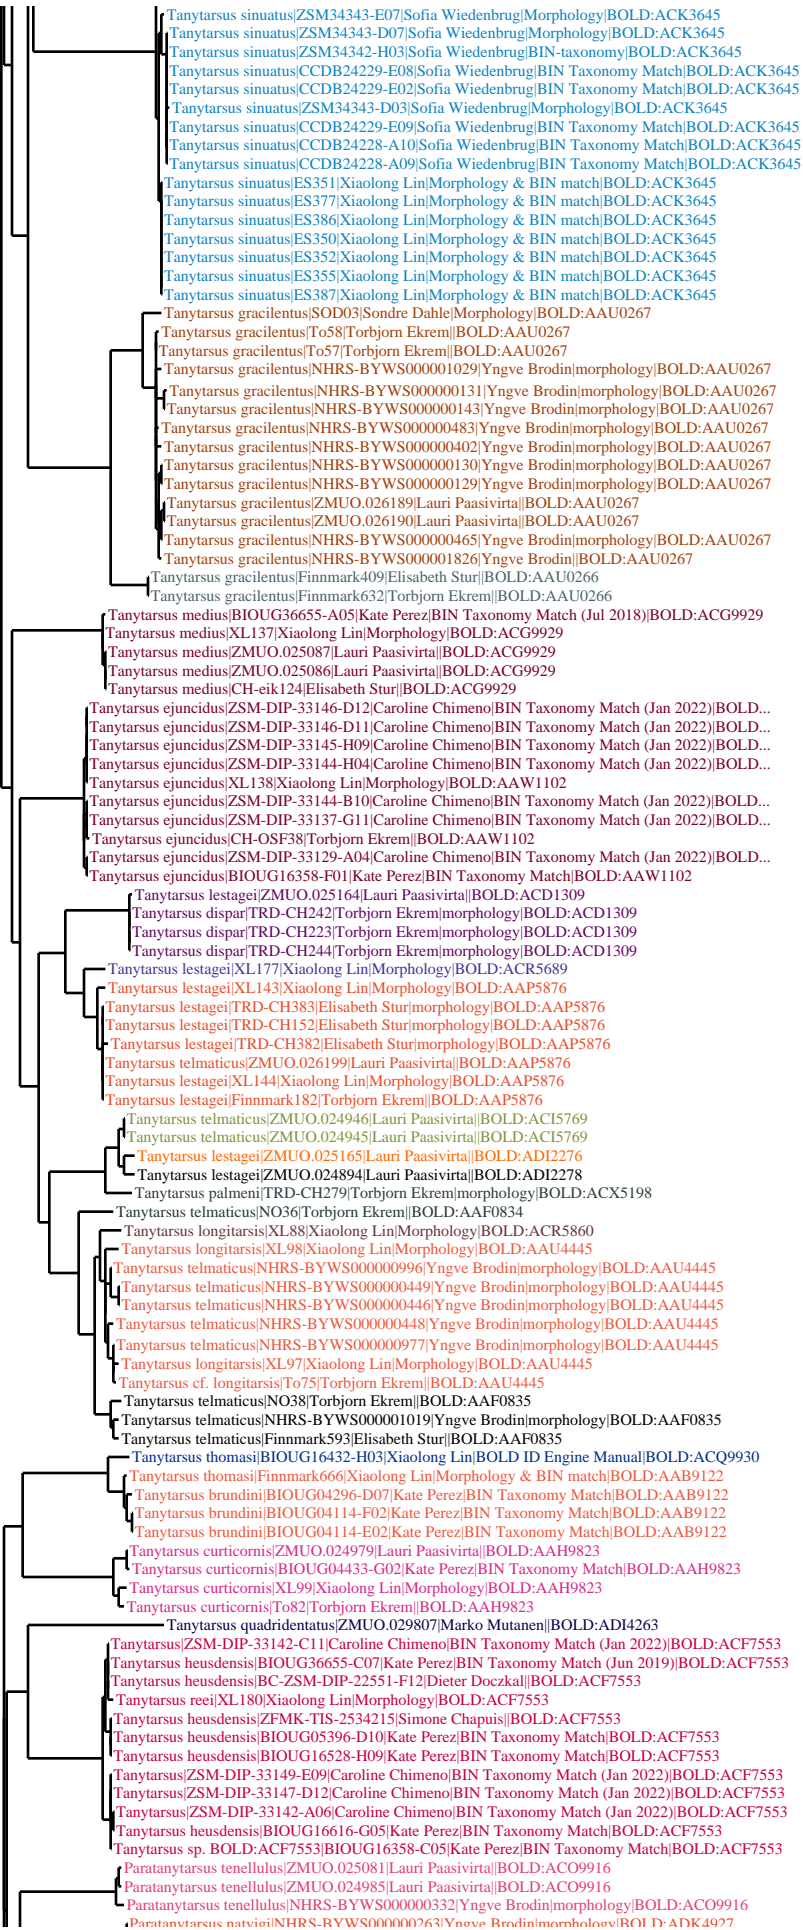

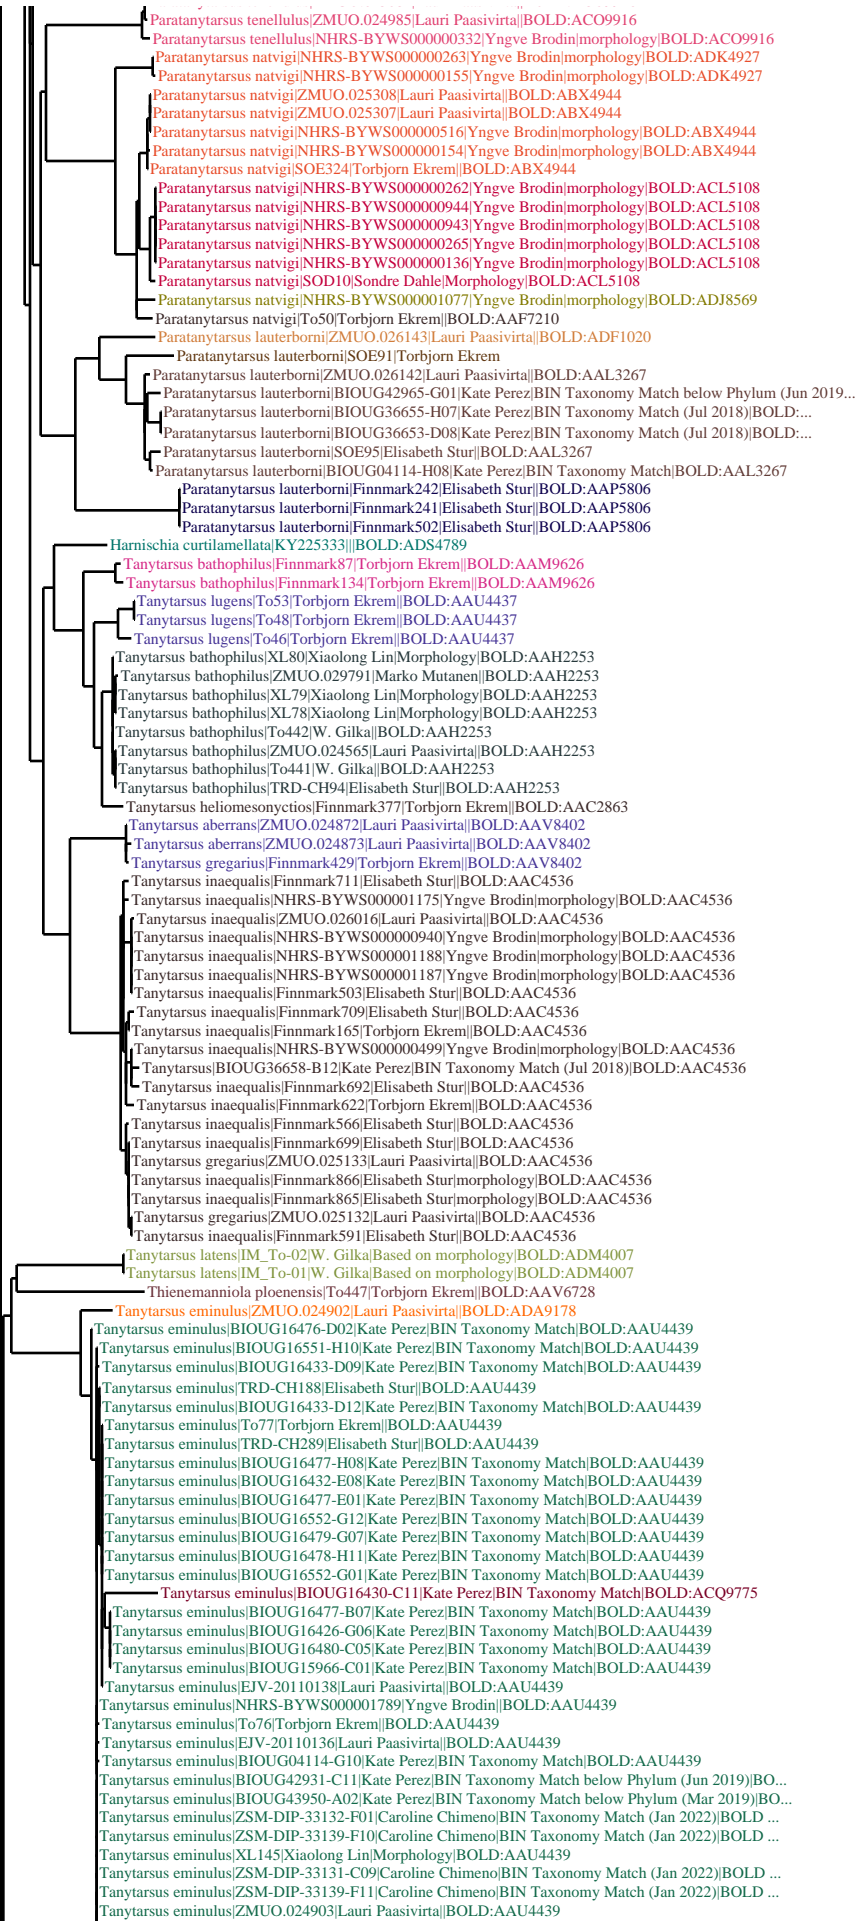

Tanytarsus eminus|ZSM-DIP-33131-C09|Caroline Chimeno|BIN Taxonomy Match (Jan 2022)|BOLD ...  
 Tanytarsus eminus|ZSM-DIP-33139-F11|Caroline Chimeno|BIN Taxonomy Match (Jan 2022)|BOLD ...  
 Tanytarsus eminus|ZMUO.024903|Lauri Paasivirta|BOLD:AAU4439  
 Tanytarsus eminus|ZSM-DIP-33170-B12|Caroline Chimeno|BIN Taxonomy Match (Jan 2022)|BOLD ...  
 Tanytarsus eminus|ZSM-DIP-33142-A05|Caroline Chimeno|BIN Taxonomy Match (Jan 2022)|BOLD ...  
 Tanytarsus eminus|BIOUG16476-D06|Kate Perez|BIN Taxonomy Match|BOLD:AAU4439  
 Tanytarsus eminus|BIOUG16480-E04|Kate Perez|BIN Taxonomy Match|BOLD:AAU4439  
 Tanytarsus eminus|BIOUG16435-G10|Kate Perez|BIN Taxonomy Match|BOLD:AAU4439  
 Tanytarsus eminus|BIOUG16430-E04|Kate Perez|BIN Taxonomy Match|BOLD:AAU4439  
 Tanytarsus eminus|BIOUG16432-A07|Kate Perez|BIN Taxonomy Match|BOLD:AAU4439  
 Tanytarsus eminus|BIOUG16431-C04|Kate Perez|BIN Taxonomy Match|BOLD:AAU4439  
 Tanytarsus eminus|BIOUG16432-G09|Kate Perez|BIN Taxonomy Match|BOLD:AAU4439  
 Tanytarsus eminus|BIOUG16476-E03|Kate Perez|BIN Taxonomy Match|BOLD:AAU4439  
 Tanytarsus eminus|BIOUG16432-D02|Kate Perez|BIN Taxonomy Match|BOLD:AAU4439  
 Tanytarsus eminus|BIOUG16434-E03|Kate Perez|BIN Taxonomy Match|BOLD:AAU4439  
 Tanytarsus eminus|BIOUG16434-D06|Kate Perez|BIN Taxonomy Match|BOLD:AAU4439  
 Tanytarsus eminus|BIOUG16557-G10|Kate Perez|BIN Taxonomy Match|BOLD:AAU4439  
 Tanytarsus eminus|BIOUG16431-C10|Kate Perez|BIN Taxonomy Match|BOLD:AAU4439  
 Tanytarsus eminus|BIOUG16476-F02|Kate Perez|BIN Taxonomy Match|BOLD:AAU4439  
 Tanytarsus eminus|BIOUG16478-E02|Kate Perez|BIN Taxonomy Match|BOLD:AAU4439  
 Tanytarsus eminus|BIOUG16436-C05|Kate Perez|BIN Taxonomy Match|BOLD:AAU4439  
 Tanytarsus eminus|BIOUG16430-E11|Kate Perez|BIN Taxonomy Match|BOLD:AAU4439  
 Tanytarsus eminus|BIOUG16433-C08|Kate Perez|BIN Taxonomy Match|BOLD:AAU4439  
 Tanytarsus eminus|BIOUG16433-D11|Kate Perez|BIN Taxonomy Match|BOLD:AAU4439  
 Tanytarsus eminus|BIOUG16480-G10|Kate Perez|BIN Taxonomy Match|BOLD:AAU4439  
 Tanytarsus eminus|BIOUG16436-H10|Kate Perez|BIN Taxonomy Match|BOLD:AAU4439  
 Tanytarsus eminus|BIOUG16436-C11|Kate Perez|BIN Taxonomy Match|BOLD:AAU4439  
 Tanytarsus eminus|BIOUG16436-B10|Kate Perez|BIN Taxonomy Match|BOLD:AAU4439  
 Tanytarsus eminus|BIOUG16436-A04|Kate Perez|BIN Taxonomy Match|BOLD:AAU4439  
 Tanytarsus eminus|BIOUG16432-C12|Kate Perez|BIN Taxonomy Match|BOLD:AAU4439  
 Tanytarsus eminus|BIOUG16479-E07|Kate Perez|BIN Taxonomy Match|BOLD:AAU4439  
 Tanytarsus eminus|BIOUG16597-B01|Kate Perez|BIN Taxonomy Match|BOLD:AAU4439  
 Tanytarsus eminus|BIOUG16552-A04|Kate Perez|BIN Taxonomy Match|BOLD:AAU4439  
 Tanytarsus eminus|BIOUG16551-H09|Kate Perez|BIN Taxonomy Match|BOLD:AAU4439  
 Tanytarsus eminus|BIOUG16555-H07|Kate Perez|BIN Taxonomy Match|BOLD:AAU4439  
 Tanytarsus eminus|BIOUG16479-G12|Kate Perez|BIN Taxonomy Match|BOLD:AAU4439  
 Tanytarsus eminus|BIOUG16431-E08|Kate Perez|BIN Taxonomy Match|BOLD:AAU4439  
 Tanytarsus eminus|BIOUG16432-F02|Kate Perez|BIN Taxonomy Match|BOLD:AAU4439  
 Tanytarsus eminus|BIOUG16436-G03|Kate Perez|BIN Taxonomy Match|BOLD:AAU4439  
 Tanytarsus eminus|BIOUG16480-D08|Kate Perez|BIN Taxonomy Match|BOLD:AAU4439  
 Tanytarsus eminus|BIOUG16436-H11|Kate Perez|BIN Taxonomy Match|BOLD:AAU4439  
 Tanytarsus eminus|BIOUG16476-D08|Kate Perez|BIN Taxonomy Match|BOLD:AAU4439  
 Tanytarsus eminus|BIOUG16479-A12|Kate Perez|BIN Taxonomy Match|BOLD:AAU4439  
 Tanytarsus eminus|BIOUG16476-F05|Kate Perez|BIN Taxonomy Match|BOLD:AAU4439  
 Tanytarsus eminus|BIOUG16430-A09|Kate Perez|BIN Taxonomy Match|BOLD:AAU4439  
 Tanytarsus eminus|BIOUG16431-B08|Kate Perez|BIN Taxonomy Match|BOLD:AAU4439  
 Tanytarsus eminus|BIOUG16431-C03|Kate Perez|BIN Taxonomy Match|BOLD:AAU4439  
 Tanytarsus eminus|BIOUG16432-H01|Kate Perez|BIN Taxonomy Match|BOLD:AAU4439  
 Tanytarsus eminus|BIOUG36776-H05|Kate Perez|BIN Taxonomy Match (Jul 2018)|BOLD:AAU4439  
 Tanytarsus eminus|BIOUG16432-B12|Kate Perez|BIN Taxonomy Match|BOLD:AAU4439  
 Tanytarsus eminus|BIOUG16434-G12|Kate Perez|BIN Taxonomy Match|BOLD:AAU4439  
 Tanytarsus eminus|BIOUG16479-F03|Kate Perez|BIN Taxonomy Match|BOLD:AAU4439  
 Tanytarsus eminus|BIOUG16432-G10|Kate Perez|BIN Taxonomy Match|BOLD:AAU4439  
 Tanytarsus eminus|BIOUG16476-C08|Kate Perez|BIN Taxonomy Match|BOLD:AAU4439  
 Tanytarsus eminus|BIOUG16476-E08|Kate Perez|BIN Taxonomy Match|BOLD:AAU4439  
 Tanytarsus eminus|BIOUG16476-B01|Kate Perez|BIN Taxonomy Match|BOLD:AAU4439  
 Tanytarsus eminus|BIOUG16478-A11|Kate Perez|BIN Taxonomy Match|BOLD:AAU4439  
 Tanytarsus eminus|BIOUG16432-G02|Kate Perez|BIN Taxonomy Match|BOLD:AAU4439  
 Tanytarsus eminus|BIOUG16435-D11|Kate Perez|BIN Taxonomy Match|BOLD:AAU4439  
 Tanytarsus eminus|BIOUG16478-F01|Kate Perez|BIN Taxonomy Match|BOLD:AAU4439  
 Tanytarsus eminus|BIOUG16430-A12|Kate Perez|BIN Taxonomy Match  
 Tanytarsus eminus|BIOUG16434-D11|Kate Perez|BIN Taxonomy Match|BOLD:AAU4439  
 Tanytarsus eminus|BIOUG16552-A10|Kate Perez|BIN Taxonomy Match|BOLD:AAU4439  
 Tanytarsus eminus|BIOUG16551-D10|Kate Perez|BIN Taxonomy Match|BOLD:AAU4439  
 Tanytarsus eminus|BIOUG16552-F07|Kate Perez|BIN Taxonomy Match|BOLD:AAU4439  
 Tanytarsus eminus|BIOUG16552-D02|Kate Perez|BIN Taxonomy Match|BOLD:AAU4439  
 Tanytarsus eminus|BIOUG16552-B06|Kate Perez|BIN Taxonomy Match|BOLD:AAU4439  
 Tanytarsus eminus|BIOUG16552-H04|Kate Perez|BIN Taxonomy Match|BOLD:AAU4439  
 Tanytarsus eminus|EJV-20110135|Lauri Paasivirta|BOLD:AAU4439  
 Neostempellina thienemanni|CCDB21606-F01|Sofia Wiedenbrug|BOLD:AAH2999  
 Neostempellina thienemanni|CCDB21606-E09|Sofia Wiedenbrug|BOLD:AAH2999  
 Neostempellina thienemanni|CCDB21606-E10|Sofia Wiedenbrug|BOLD:AAH2999  
 Neostempellina thienemanni|CCDB21606-E06|Sofia Wiedenbrug|BOLD:AAH2999  
 Neostempellina thienemanni|CCDB21606-E08|Sofia Wiedenbrug|BOLD:AAH2999  
 Neostempellina thienemanni|To332|Torbjorn Ekrem|BOLD:AAH2999  
 Constempellina brevicosta|ZMUO.026222|Lauri Paasivirta|BOLD:AAP5885  
 Constempellina brevicosta|NHRS-BYWS000001097|Yngve Brodin|morphology|BOLD:AAP5885  
 Constempellina brevicosta|NHRS-BYWS000001098|Yngve Brodin|morphology|BOLD:AAP5885  
 Constempellina brevicosta|ZMUO.026221|Lauri Paasivirta|BOLD:AAP5885  
 Constempellina|Finmark180|Torbjorn Ekrem|morphology|BOLD:AAP5885  
 Stempellina sp. 1ES|ATNA552|Elisabeth Stur|BOLD:AAH2999  
 Stempellina sp. 1ES|ATNA522|Elisabeth Stur|BOLD:AAH2999  
 Stempellina sp. 1ES|ATNA523|Elisabeth Stur|BOLD:AAH2999  
 Stempellina sp. 1ES|ATNA521|Elisabeth Stur|BOLD:AAH2999  
 Stempellina sp. 1ES|ATNA519|Elisabeth Stur|BOLD:AAH2999  
 Stempellina sp. 1ES|EBAI-Ch167|Elisabeth Stur|morphology|BOLD:AAH2999  
 Stempellina sp. 1ES|EBAI-Ch166|Elisabeth Stur|morphology|BOLD:AAH2999  
 Stempellina sp. 1ES|EBAI-Ch252|Elisabeth Stur|morphology|BOLD:AAH2999  
 Stempellina sp. 1ES|EBAI-Ch168|Elisabeth Stur|morphology|BOLD:AAH2999  
 Stempellina sp. 1ES|ATNA520|Elisabeth Stur|BOLD:AAH2999  
 Stempellina sp. 1ES|ATNA186|Elisabeth Stur|BOLD:AAH2999  
 Constempellina brevicosta|Finmark431|Elisabeth Stur|BOLD:ACS1632  
 Constempellina brevicosta|ZMUO.024300|Lauri Paasivirta|BOLD:ACS1634  
 Constempellina brevicosta|ZMUO.024299|Lauri Paasivirta|BOLD:ACS1634  
 Constempellina brevicosta|Finmark124|Elisabeth Stur|BOLD:ACS1634  
 Constempellina brevicosta|Finmark372|Elisabeth Stur|BOLD:ACS1634  
 Constempellina brevicosta|To136|Torbjorn Ekrem|BOLD:ACS1633  
 Constempellina brevicosta|Finmark117|Elisabeth Stur|BOLD:ACS1633  
 Constempellina brevicosta|Finmark84|Elisabeth Stur|BOLD:ACS1633  
 Constempellina brevicosta|Finmark80|Torbjorn Ekrem|BOLD:ACS1633  
 Constempellina brevicosta|CH-OSF142|Elisabeth Stur|BOLD:ACS1633  
 Constempellina brevicosta|CH-OSF143|Elisabeth Stur|BOLD:ACS1633  
 Constempellina brevicosta|Finmark793|Elisabeth Stur|BOLD:ACS1633

Constempellina brevicosta|CH-OSF142|Elisabeth Stur|BOLD:ACS1633  
 Constempellina brevicosta|CH-OSF143|Elisabeth Stur|BOLD:ACS1633  
 Constempellina brevicosta|Finmark793|Elisabeth Stur|BOLD:ACS1633  
 Constempellina brevicosta|Finmark81|Elisabeth Stur|BOLD:ACS1633  
 Constempellina brevicosta|Finmark123|Elisabeth Stur|BOLD:ACS1633  
 Constempellina brevicosta|Finmark371|Elisabeth Stur|BOLD:ACS1633  
 Paratanyarsus brevicar|ZMUO.025229|Lauri Paasivirta|BOLD:AAx1215  
 Paratanyarsus brevicar|ZMUO.025228|Lauri Paasivirta|BOLD:AAx1215  
 Paratanyarsus|ZSM-DIP-33129-C03|Caroline Chimen|BIN Taxonomy Match (Jan 2022)|BOLD:AAx...  
 Paratanyarsus brevicar|ZMUO.026343|Lauri Paasivirta|BOLD:ADF1942  
 Microspectra kliniki|ZSM-DIP-33139-G02|Caroline Chimen|BIN Taxonomy Match (Jan 2022)|BOLD ...  
 Microspectra kliniki|ZSM-DIP-33139-G03|Caroline Chimen|BIN Taxonomy Match (Jan 2022)|BOLD ...  
 Microspectra kliniki|ZMUO.029790|Marko Mutanen|BOLD:AAW0057  
 Microspectra kliniki|BIOUG36624-H01|Kate Perez|BIN Taxonomy Match (Jul 2018)|BOLD:AAW0057  
 Microspectra kliniki|CH-OSF18|Elisabeth Stur|BOLD:AAW0057  
 Microspectra logani|TRD-CH276|Elisabeth Stur|BOLD:AAB3857  
 Microspectra logani|BIOUG16259-F07|Kate Perez|BIN Taxonomy Match|BOLD:AAB3857  
 Microspectra logani|Finmark555|Elisabeth Stur|BOLD:AAB3857  
 Microspectra logani|PK-190-38|Petra Kranzfelder|morphology  
 Microspectra logani|PK-190-39|Petra Kranzfelder|morphology  
 Microspectra logani|PK-188-2|Petra Kranzfelder|morphology|BOLD:AAB3857  
 Microspectra logani|BIOUG15538-D01|Kate Perez|BIN Taxonomy Match|BOLD:AAB3857  
 Microspectra logani|PK-191-20|Petra Kranzfelder|morphology|BOLD:AAB3857  
 Microspectra logani|PK-191-22|Petra Kranzfelder|morphology|BOLD:AAB3857  
 Microspectra logani|PK-191-23|Petra Kranzfelder|morphology|BOLD:AAB3857  
 Microspectra logani|PK-192-18|Petra Kranzfelder|morphology|BOLD:AAB3857  
 Microspectra logani|PK-192-20|Petra Kranzfelder|morphology|BOLD:AAB3857  
 Microspectra logani|BIOUG16328-B03|Kate Perez|BIN Taxonomy Match|BOLD:AAB3857  
 Microspectra logani|TRD-CH401|Elisabeth Stur|morphology|BOLD:AAB3857  
 Microspectra logani|BIOUG16625-A03|Kate Perez|BIN Taxonomy Match|BOLD:AAB3857  
 Microspectra logani|BIOUG16328-G02|Kate Perez|BIN Taxonomy Match|BOLD:AAB3857  
 Microspectra logani|BIOUG16331-A12|Kate Perez|BIN Taxonomy Match|BOLD:AAB3857  
 Microspectra logani|BIOUG16261-A01|Kate Perez|BIN Taxonomy Match|BOLD:AAB3857  
 Microspectra logani|BIOUG17025-C08|Kate Perez|BIN Taxonomy Match|BOLD:AAB3857  
 Microspectra logani|BIOUG16329-A09|Kate Perez|BIN Taxonomy Match|BOLD:AAB3857  
 Microspectra logani|BIOUG16329-A12|Kate Perez|BIN Taxonomy Match|BOLD:AAB3857  
 Microspectra logani|BIOUG16478-F11|Kate Perez|BIN Taxonomy Match|BOLD:AAB3857  
 Microspectra logani|BIOUG16332-E05|Kate Perez|BIN Taxonomy Match|BOLD:AAB3857  
 Microspectra logani|BIOUG16479-A05|Kate Perez|BIN Taxonomy Match|BOLD:AAB3857  
 Microspectra logani|BIOUG16435-C02|Kate Perez|BIN Taxonomy Match|BOLD:AAB3857  
 Microspectra logani|BIOUG16626-F04|Kate Perez|BIN Taxonomy Match|BOLD:AAB3857  
 Microspectra logani|BIOUG16297-E01|Kate Perez|BIN Taxonomy Match|BOLD:AAB3857  
 Microspectra logani|BIOUG16332-D03|Kate Perez|BIN Taxonomy Match|BOLD:AAB3857  
 Microspectra logani|BIOUG15963-D04|Kate Perez|BIN Taxonomy Match|BOLD:AAB3857  
 Microspectra logani|BIOUG15465-E07|Kate Perez|BIN Taxonomy Match|BOLD:AAB3857  
 Microspectra logani|Finmark42|Elisabeth Stur|BOLD:AAB3857  
 Microspectra logani|ZMUO.024584|Lauri Paasivirta|BOLD:AAB3857  
 Microspectra logani|EBAl-Ch013|Elisabeth Stur|morphology|BOLD:AAB3857  
 Microspectra logani|ATNA17|Elisabeth Stur|BOLD:AAB3857  
 Microspectra logani|BIOUG16299-B04|Kate Perez|BIN Taxonomy Match|BOLD:AAB3857  
 Microspectra logani|BIOUG16333-G11|Kate Perez|BIN Taxonomy Match|BOLD:AAB3857  
 Microspectra logani|TRD-CH165|Elisabeth Stur|BOLD:AAB3857  
 Microspectra logani|PK-192-17|Petra Kranzfelder|morphology|BOLD:AAB3857  
 Microspectra logani|PK-189-2|Petra Kranzfelder|morphology|BOLD:AAB3857  
 Microspectra logani|ZSM-DIP-33141-E08|Caroline Chimen|BIN Taxonomy Match (Jan 2022)|BOLD ...  
 Microspectra logani|ATNA165|Elisabeth Stur|BOLD:AAB3857  
 Microspectra logani|ATNA177|Elisabeth Stur|BOLD:AAB3857  
 Microspectra logani|ATNA411|Elisabeth Stur|BOLD:AAB3857  
 Microspectra logani|ZMUO.026270|Lauri Paasivirta|BOLD:AAB3857  
 Microspectra logani|ATNA27|Elisabeth Stur|BOLD:AAB3857  
 Microspectra logani|BIOUG15545-D12|Kate Perez|BIN Taxonomy Match|BOLD:AAB3857  
 Microspectra logani|ATNA36|Elisabeth Stur|BOLD:AAB3857  
 Microspectra logani|EBAl-Ch014|Elisabeth Stur|morphology|BOLD:AAB3857  
 Microspectra logani|BIOUG15654-H02|Kate Perez|BIN Taxonomy Match|BOLD:AAB3857  
 Microspectra logani|BIOUG16331-B08|Kate Perez|BIN Taxonomy Match|BOLD:AAB3857  
 Microspectra logani|BIOUG16260-G10|Kate Perez|BIN Taxonomy Match|BOLD:AAB3857  
 Microspectra logani|BIOUG16333-B02|Kate Perez|BIN Taxonomy Match|BOLD:AAB3857  
 Microspectra logani|ATNA22|Elisabeth Stur|BOLD:AAB3857  
 Microspectra logani|ATNA121|Elisabeth Stur|BOLD:AAB3857  
 Microspectra logani|ATNA35|Elisabeth Stur|BOLD:AAB3857  
 Microspectra logani|ATNA34|Elisabeth Stur|BOLD:AAB3857  
 Microspectra logani|ATNA183|Elisabeth Stur|BOLD:AAB3857  
 Microspectra logani|BIOUG16328-A02|Kate Perez|BIN Taxonomy Match|BOLD:AAB3857  
 Microspectra logani|BIOUG15537-E02|Kate Perez|BIN Taxonomy Match|BOLD:AAB3857  
 Microspectra logani|ZMUO.024585|Lauri Paasivirta|BOLD:AAB3857  
 Microspectra logani|To33|Torbjorn Ekrem|BOLD:AAB3857  
 Microspectra logani|PK-191-14|Petra Kranzfelder|morphology|BOLD:AAB3857  
 Microspectra logani|PK-192-16|Petra Kranzfelder|morphology|BOLD:AAB3857  
 Microspectra logani|PK-190-36|Petra Kranzfelder|morphology|BOLD:AAB3857  
 Microspectra logani|BIOUG16331-D05|Kate Perez|BIN Taxonomy Match|BOLD:AAB3857  
 Microspectra logani|BIOUG16298-A02|Kate Perez|BIN Taxonomy Match|BOLD:AAB3857  
 Microspectra logani|BIOUG16257-F10|Kate Perez|BIN Taxonomy Match|BOLD:AAB3857  
 Microspectra logani|BIOUG16297-B12|Kate Perez|BIN Taxonomy Match|BOLD:AAB3857  
 Microspectra logani|BIOUG16259-B01|Kate Perez|BIN Taxonomy Match|BOLD:AAB3857  
 Microspectra logani|BIOUG16256-D10|Kate Perez|BIN Taxonomy Match|BOLD:AAB3857  
 Microspectra logani|BIOUG16256-E10|Kate Perez|BIN Taxonomy Match|BOLD:AAB3857  
 Microspectra logani|BIOUG16259-A04|Kate Perez|BIN Taxonomy Match|BOLD:AAB3857  
 Microspectra logani|BIOUG16260-A08|Kate Perez|BIN Taxonomy Match|BOLD:AAB3857  
 Microspectra logani|BIOUG16296-D11|Kate Perez|BIN Taxonomy Match|BOLD:AAB3857  
 Microspectra logani|BIOUG16627-A12|Kate Perez|BIN Taxonomy Match|BOLD:AAB3857  
 Microspectra logani|BIOUG16631-G06|Kate Perez|BIN Taxonomy Match|BOLD:AAB3857  
 Microspectra logani|BIOUG16296-F07|Kate Perez|BIN Taxonomy Match|BOLD:AAB3857  
 Microspectra logani|BIOUG16330-C06|Kate Perez|BIN Taxonomy Match|BOLD:AAB3857  
 Microspectra logani|BIOUG16332-F04|Kate Perez|BIN Taxonomy Match|BOLD:AAB3857  
 Microspectra logani|BIOUG16332-B05|Kate Perez|BIN Taxonomy Match|BOLD:AAB3857  
 Microspectra logani|Finmark09|Elisabeth Stur|BOLD:AAB3857  
 Microspectra logani|Finmark132|Elisabeth Stur|BOLD:AAB3857  
 Microspectra logani|PK-188-1|Petra Kranzfelder|morphology|BOLD:AAB3857  
 Microspectra logani|BIOUG16299-E10|Kate Perez|BIN Taxonomy Match|BOLD:AAB3857  
 Microspectra logani|Finmark378|Elisabeth Stur|BOLD:AAB3857  
 Microspectra pallidula|ZSM-DIP-33137-A04|Caroline Chimen|BIN Taxonomy Match (Jan 2022)|BOL...  
 Microspectra pallidula|ZSM-DIP-33144-F08|Caroline Chimen|BIN Taxonomy Match (Jan 2022)|BOL...  
 Microspectra pallidula|ZSM-DIP-33146-E08|Caroline Chimen|BIN Taxonomy Match (Jan 2022)|BOL...

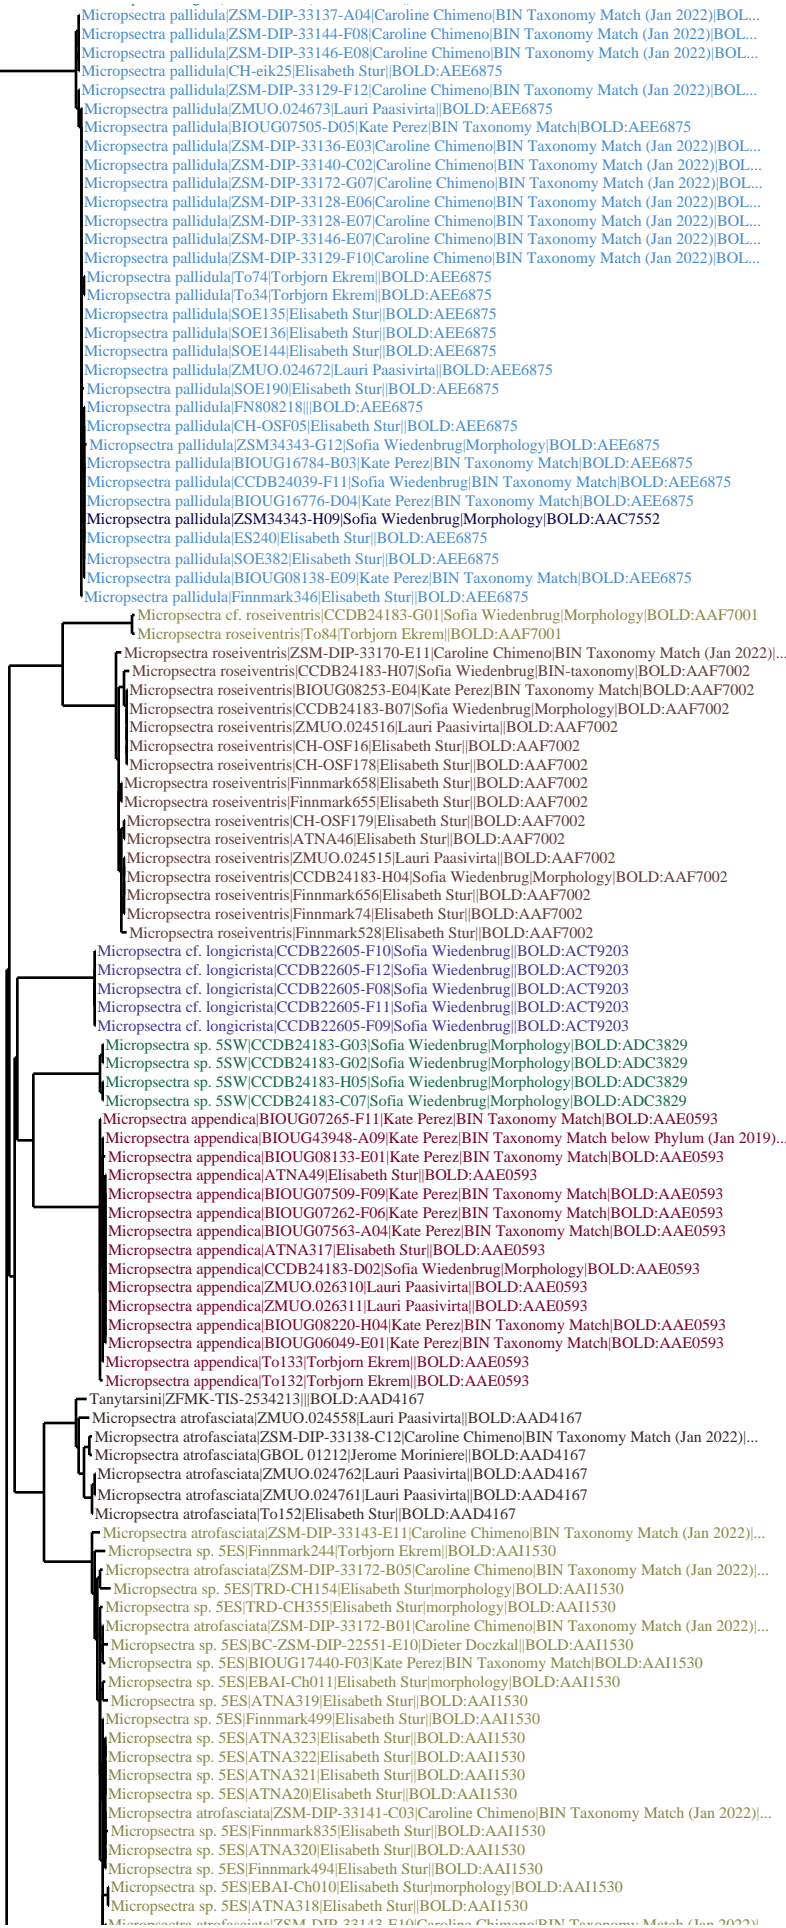

Micropsectra sp. 5ES|EBAI-Ch010|Elisabeth Stur|morphology|BOLD:AAI1530  
 Micropsectra sp. 5ES|ATNA318|Elisabeth Stur|BOLD:AAI1530  
 Micropsectra atrofasciata|ZSM-DIP-33143-E10|Caroline Chimenó|BIN Taxonomy Match (Jan 2022)|...  
 Micropsectra sp. 5ES|TRD-CH380|Elisabeth Stur|morphology|BOLD:AAI1530  
 Micropsectra|BIOUG16298-H01|Kate Perez|BIN Taxonomy Match|BOLD:AAI1530  
 Micropsectra|BIOUG42764-C08|Kate Perez|BIN Taxonomy Match below Phylum (Jun 2019)|BOLD:A...  
 Micropsectra atrofasciata|ZSM-DIP-33131-H09|Caroline Chimenó|BIN Taxonomy Match (Jan 2022)|...  
 Micropsectra sp. 5ES|CH-OSF51|Elisabeth Stur|BOLD:AAI1530  
 Micropsectra sp. 5ES|CH-OSF119|Elisabeth Stur|BOLD:AAI1530  
 Micropsectra sp. 5ES|CH-OSF101|Elisabeth Stur|BOLD:AAI1530  
 Micropsectra sp. 5ES|BIOUG17096-D12|Kate Perez|BIN Taxonomy Match|BOLD:AAI1530  
 Micropsectra sp. 5ES|CH-OSF45|Elisabeth Stur|BOLD:AAI1530  
 Micropsectra sp. 5ES|CH-OSF19|Elisabeth Stur|BOLD:AAI1530  
 Micropsectra sp. 5ES|ATNA517|Elisabeth Stur|BOLD:AAI1530  
 Micropsectra atrofasciata|ZSM-DIP-33148-F10|Caroline Chimenó|BIN Taxonomy Match (Jan 2022)|...  
 Micropsectra atrofasciata|ZSM-DIP-33141-C04|Caroline Chimenó|BIN Taxonomy Match (Jan 2022)|...  
 Micropsectra atrofasciata|ZSM-DIP-33172-C10|Caroline Chimenó|BIN Taxonomy Match (Jan 2022)|...  
 Micropsectra sp. 5ES|Finmark837|Elisabeth Stur|BOLD:AAI1530  
 Micropsectra sp. 5ES|ATNA53|Elisabeth Stur|BOLD:AAI1530  
 Micropsectra atrofasciata|ZMUO.024557|Lauri Paasivirta|BOLD:AAI1530  
 Micropsectra sp. 5ES|PK-189-1|Elisabeth Stur|BIN Taxonomy Match?|BOLD:AAI1530  
 Micropsectra sp. 5ES|CCDB24228-F09|Sofia Wiedenbrug|BIN Taxonomy Match|BOLD:AAI1530  
 Micropsectra sp. 5ES|CCDB24228-E06|Sofia Wiedenbrug|BIN Taxonomy Match|BOLD:AAI1530  
 Micropsectra|BIOUG15905-H11|Kate Perez|BIN Taxonomy Match|BOLD:AAI1530  
 Micropsectra sp. 5ES|Finmark500|Elisabeth Stur|BOLD:AAI1530  
 Micropsectra sp. 5ES|Finmark245|Torbjorn Ekrem|BOLD:AAI1530  
 Micropsectra sp. 5ES|Finmark148|Elisabeth Stur|BOLD:AAI1530  
 Micropsectra sp. 5ES|Finmark448|Elisabeth Stur|BOLD:AAI1530  
 Micropsectra calcifontis|ZMUO.026347|Lauri Paasivirta|BOLD:ADF0014  
 Micropsectra calcifontis|ZMUO.026346|Lauri Paasivirta|BOLD:ACR4872  
 Micropsectra|CCDB24228-E07|Sofia Wiedenbrug|BIN Taxonomy Match|BOLD:ACU4582  
 Micropsectra|BC-ZSM-DIP-22488-F08|Dieter Doezkal|BOLD:ACU4582  
 Micropsectra|CCDB24228-C06|Sofia Wiedenbrug|BIN Taxonomy Match|BOLD:ACU4582  
 Micropsectra|CCDB24037-C05|Sofia Wiedenbrug|BIN Taxonomy Match|BOLD:ACU4582  
 Micropsectra|BC-ZSM-DIP-22551-C04|Dieter Doezkal|BOLD:ACU4582  
 Micropsectra oberaarensis|To349|Torbjorn Ekrem|BOLD:AAG0291  
 Micropsectra oberaarensis|To336|Torbjorn Ekrem|BOLD:AAG0291  
 Micropsectra seguyi|To334|Elisabeth Stur|BOLD:AAE8101  
 Micropsectra seguyi|To333|Elisabeth Stur|BOLD:AAE8101  
 Micropsectra sp. To391|ZSM34342-E12|Sofia Wiedenbrug|BIN-taxonomy|BOLD:ACB3649  
 Micropsectra attenuata|ZSM-DIP-33141-G12|Caroline Chimenó|BIN Taxonomy Match (Jan 2022)|BOL...  
 Micropsectra attenuata|ES80|Elisabeth Stur|BOLD:AAC7793  
 Micropsectra attenuata|SOE244|Elisabeth Stur|BOLD:AAC7793  
 Micropsectra attenuata|SOE224|Elisabeth Stur|BOLD:AAC7793  
 Micropsectra attenuata|To302|Torbjorn Ekrem|BOLD:AAC7793  
 Micropsectra attenuata|To131|Torbjorn Ekrem|BOLD:AAC7793  
 Micropsectra attenuata|ES78|Torbjorn Ekrem|BOLD:AAC7793  
 Micropsectra attenuata|To109|Elisabeth Stur|BOLD:AAC7793  
 Micropsectra lacustris|Aly02|Alyssa M. Anderson|BOLD:AAE8086  
 Micropsectra lacustris|Finmark836|Elisabeth Stur|BOLD:AAE8086  
 Micropsectra lacustris|ATNA308|Elisabeth Stur|BOLD:AAE8086  
 Micropsectra lacustris|EBAI-Ch005|Elisabeth Stur|morphology|BOLD:AAE8086  
 Micropsectra lacustris|EBAI-Ch003|Elisabeth Stur|morphology|BOLD:AAE8086  
 Micropsectra lacustris|Finmark761|Elisabeth Stur|BOLD:AAE8086  
 Micropsectra lacustris|Finmark157|Elisabeth Stur|BOLD:AAE8086  
 Micropsectra lacustris|ATNA309|Elisabeth Stur|BOLD:AAE8086  
 Micropsectra lacustris|Aly01|Alyssa M. Anderson|BOLD:AAE8086  
 Micropsectra lacustris|Finmark149|Elisabeth Stur|BOLD:AAE8086  
 Micropsectra lacustris|ATNA120|Elisabeth Stur|BOLD:AAE8086  
 Micropsectra lacustris|EBAI-Ch002|Elisabeth Stur|morphology|BOLD:AAE8086  
 Micropsectra lacustris|EBAI-Ch004|Elisabeth Stur|morphology|BOLD:AAE8086  
 Micropsectra lacustris|EBAI-Ch006|Elisabeth Stur|morphology|BOLD:AAE8086  
 Micropsectra lacustris|EBAI-Ch007|Elisabeth Stur|morphology|BOLD:AAE8086  
 Micropsectra lacustris|EBAI-Ch008|Elisabeth Stur|morphology|BOLD:AAE8086  
 Micropsectra lacustris|EBAI-Ch009|Elisabeth Stur|morphology|BOLD:AAE8086  
 Micropsectra lacustris|EBAI-Ch001|Elisabeth Stur|morphology|BOLD:AAE8086  
 Micropsectra lacustris|EBAI-Ch177|Elisabeth Stur|morphology|BOLD:AAE8086  
 Micropsectra lacustris|EBAI-Ch248|Elisabeth Stur|BOLD:AAE8086  
 Micropsectra lacustris|ATNA30|Elisabeth Stur|BOLD:AAE8086  
 Micropsectra lacustris|ATNA409|Elisabeth Stur|BOLD:AAE8086  
 Micropsectra styriaca|ZMUO.025829|Lauri Paasivirta|BOLD:ADF0546  
 Micropsectra styriaca|ZMUO.024693|Lauri Paasivirta|BOLD:ADF0731  
 Micropsectra styriaca|ZMUO.024692|Lauri Paasivirta|BOLD:ADF0731  
 Micropsectra styriaca|ZMUO.025828|Lauri Paasivirta|BOLD:AAV4675  
 Micropsectra styriaca|CH-OSF181|Elisabeth Stur|BOLD:AAV4675  
 Micropsectra|CCDB24228-H10|Sofia Wiedenbrug|BIN Taxonomy Match|BOLD:ACU5456  
 Micropsectra|CCDB24228-H11|Sofia Wiedenbrug|BIN Taxonomy Match|BOLD:ACU5456  
 Micropsectra|CCDB24228-H09|Sofia Wiedenbrug|BIN Taxonomy Match|BOLD:ACU5456  
 Micropsectra acuta|ES286|Torbjorn Ekrem|BOLD:AAK3960  
 Rheotanytarsus|BIOUG16614-G11|Kate Perez|BOLD ID Engine Manual|BOLD:ACR3994  
 Rheotanytarsus|BIOUG16612-H06|Kate Perez|BOLD ID Engine Manual|BOLD:ACR3994  
 Rheotanytarsus|BIOUG16614-D07|Kate Perez|BOLD ID Engine Manual|BOLD:ACR3994  
 Rheotanytarsus|BIOUG16647-D12|Kate Perez|BOLD ID Engine Manual|BOLD:ACR3994  
 Rheotanytarsus|BIOUG16619-D05|Kate Perez|BIN Taxonomy Match|BOLD:ACR3994  
 Rheotanytarsus|BIOUG16609-E09|Kate Perez|BOLD ID Engine Manual|BOLD:ACR3994  
 Rheotanytarsus|BIOUG16614-B12|Kate Perez|BOLD ID Engine Manual|BOLD:ACR3994  
 Rheotanytarsus|BIOUG15977-B06|Kate Perez|BOLD ID Engine Manual|BOLD:ACR3994  
 Rheotanytarsus|BIOUG16526-A05|Kate Perez|BOLD ID Engine Manual|BOLD:ACR3994  
 Rheotanytarsus|BIOUG16619-B11|Kate Perez|BIN Taxonomy Match|BOLD:ACR3994  
 Rheotanytarsus|BIOUG17224-G12|Kate Perez|BOLD ID Engine Manual|BOLD:ACR3994  
 Rheotanytarsus|BIOUG16613-F11|Kate Perez|BOLD ID Engine Manual|BOLD:ACR3994  
 Rheotanytarsus erignus|BIOUG16620-F04|Kate Perez|BIN Taxonomy Match (Feb 2020)|BOLD:ACR3994  
 Rheotanytarsus|BIOUG16619-C09|Kate Perez|BIN Taxonomy Match|BOLD:ACR3994  
 Rheotanytarsus|BIOUG16269-H03|Kate Perez|BOLD ID Engine Manual|BOLD:ACR3994  
 Rheotanytarsus|BIOUG16647-B02|Kate Perez|BOLD ID Engine Manual|BOLD:ACR3994  
 Rheotanytarsus|BIOUG16527-D07|Kate Perez|BOLD ID Engine Manual|BOLD:ACR3994  
 Rheotanytarsus erignus|BIOUG16620-D05|Kate Perez|BIN Taxonomy Match (Feb 2020)|BOLD:ACR3994  
 Rheotanytarsus|BIOUG16620-E10|Kate Perez|BIN Taxonomy Match|BOLD:ACR3994  
 Rheotanytarsus curtiylus|MZ004967||BOLD:ACR3994  
 Rheotanytarsus|BIOUG17225-E07|Kate Perez|BOLD ID Engine Manual|BOLD:ACR3994  
 Rheotanytarsus|BIOUG16614-B04|Kate Perez|BOLD ID Engine Manual|BOLD:ACR3994  
 Rheotanytarsus|BIOUG16736-H03|Kate Perez|BOLD ID Engine Manual|BOLD:ACR3994

A phylogenetic tree diagram showing the relationships between various species of the genus *Micropsectra*. The tree is rooted on the left and branches out to the right. Each terminal node is labeled with a species name and associated data, such as accession numbers, authors, and dates. The labels are color-coded: blue for *Rheotanytarsus* species, orange for *Micropsectra* species, and black for *Chironomidae* species. The tree shows a clear separation between the *Rheotanytarsus* clade, the *Micropsectra* clade, and the *Chironomidae* clade. Within the *Micropsectra* clade, there are several sub-clades, including those based on geographic origin (e.g., *M. borealis*, *M. schrankelae*, *M. chionophila*) and those based on specific morphological or genetic markers (e.g., *M. sofiae*, *M. uliginosa*).

Species and associated data listed in the tree include:

- Rheotanytarsus* species (e.g., *R. BOLD ID Engine Manual*, *R. ACR3994*)
- Micropsectra* species (e.g., *M. bavarica*, *M. sp. 3SW/CCDB21606-A11*, *M. sofiae*, *M. schrankelae*, *M. borealis*, *M. lindrothi*, *M. uliginosa*, *M. chionophila*, *M. nana*)
- Chironomidae* species (e.g., *Ch. ZSM-DIP-33172-B07*, *Ch. ZSM-DIP-33148-F09*, *Ch. ZSM-DIP-33149-G02*, *Ch. ZSM-DIP-33172-C09*, *Ch. ZSM-DIP-33172-B03*)



Micropsectra nana|BIOUG05216-E08|Kate Perez|BIN Taxonomy Match|BOLD:AAE7238  
 Micropsectra nana|BIOUG05216-G10|Kate Perez|BIN Taxonomy Match|BOLD:AAE7238  
 Micropsectra nana|BIOUG05396-E10|Kate Perez|BIN Taxonomy Match|BOLD:AAE7238  
 Micropsectra nana|BIOUG05485-F09|Kate Perez|BIN Taxonomy Match|BOLD:AAE7238  
 Micropsectra nana|BIOUG05215-A05|Kate Perez|BIN Taxonomy Match|BOLD:AAE7238  
 Micropsectra nana|BIOUG05216-C09|Kate Perez|BIN Taxonomy Match|BOLD:AAE7238  
 Micropsectra nana|BIOUG05484-H11|Kate Perez|BIN Taxonomy Match|BOLD:AAE7238  
 Micropsectra nana|BIOUG05215-H05|Kate Perez|BIN Taxonomy Match|BOLD:AAE7238  
 Micropsectra nana|BIOUG06052-G08|Kate Perez|BIN Taxonomy Match|BOLD:AAE7238  
 Micropsectra nana|BIOUG05216-F12|Kate Perez|BIN Taxonomy Match|BOLD:AAE7238  
 Micropsectra nana|CH-eik76|Elisabeth Sturj|BOLD:AAE7238  
 Micropsectra nana|BIOUG05218-G03|Kate Perez|BIN Taxonomy Match|BOLD:AAE7238  
 Micropsectra nana|BIOUG05101-B04|Kate Perez|BIN Taxonomy Match|BOLD:AAE7238  
 Micropsectra nana|BIOUG06053-D03|Kate Perez|BIN Taxonomy Match|BOLD:AAE7238  
 Micropsectra nana|BIOUG05218-G06|Kate Perez|BIN Taxonomy Match|BOLD:AAE7238  
 Micropsectra nana|BIOUG05219-G10|Kate Perez|BIN Taxonomy Match|BOLD:AAE7238  
 Micropsectra nana|BIOUG05215-G01|Kate Perez|BIN Taxonomy Match|BOLD:AAE7238  
 Micropsectra nana|BIOUG05218-C11|Kate Perez|BIN Taxonomy Match|BOLD:AAE7238  
 Micropsectra nana|BIOUG05217-H03|Kate Perez|BIN Taxonomy Match|BOLD:AAE7238  
 Micropsectra nana|BIOUG06052-H06|Kate Perez|BIN Taxonomy Match|BOLD:AAE7238  
 Micropsectra nana|BIOUG05484-D09|Kate Perez|BIN Taxonomy Match|BOLD:AAE7238  
 Micropsectra nana|BC-ZSM-DIP-22551-E01|Dieter Doczkal|BOLD:AAE7238  
 Micropsectra nana|BIOUG05486-E08|Kate Perez|BIN Taxonomy Match|BOLD:AAE7238  
 Micropsectra nana|BIOUG08180-G08|Kate Perez|BIN Taxonomy Match|BOLD:AAE7238  
 Micropsectra nana|BIOUG06087-H01|Kate Perez|BIN Taxonomy Match|BOLD:AAE7238  
 Micropsectra nana|BIOUG05267-D12|Kate Perez|BIN Taxonomy Match|BOLD:AAE7238  
 Micropsectra nana|BIOUG06094-G08|Kate Perez|BIN Taxonomy Match|BOLD:AAE7238  
 Micropsectra nana|CCDB24183-F07|Sofia Wiedenbrug|Morphology|BOLD:AAE7238  
 Micropsectra nana|BIOUG05219-F06|Kate Perez|BIN Taxonomy Match|BOLD:AAE7238  
 Micropsectra nana|BIOUG05947-A01|Kate Perez|BIN Taxonomy Match|BOLD:AAE7238  
 Micropsectra lindebergi|ZMUO.024605|Lauri Paasivirta|BOLD:ABY9720  
 Micropsectra insignilobus|ZMUO.024309|Lauri Paasivirta|BOLD:ABY9720  
 Micropsectra insignilobus|ZMUO.024308|Lauri Paasivirta|BOLD:ABY9720  
 Micropsectra lindebergi|ZMUO.024512|Lauri Paasivirta|BOLD:ABY9720  
 Micropsectra lindebergi|ZMUO.024511|Lauri Paasivirta|BOLD:ABY9720  
 Micropsectra lindebergi|ZMUO.024604|Lauri Paasivirta|BOLD:ABY9720  
 Micropsectra insignilobus|Finmark68|Elisabeth Sturj|BOLD:ABY9720  
 Micropsectra insignilobus|ZMUO.024286|Lauri Paasivirta|BOLD:ABY9720  
 Micropsectra insignilobus|Finmark524|Elisabeth Sturj|BOLD:ABY9720  
 Micropsectra insignilobus|ZMUO.024287|Lauri Paasivirta|BOLD:ACF1868  
 Micropsectra insignilobus|Finmark682|Elisabeth Sturj|BOLD:ACF1868  
 Micropsectra insignilobus|TRD-CH2|Elisabeth Sturj|BOLD:AAB9837  
 Micropsectra insignilobus|To31|Torbjorn Ekrem|BOLD:AAB9837  
 Micropsectra insignilobus|Finmark376|Elisabeth Sturj|BOLD:ADT7628  
 Micropsectra notescens|To352|Torbjorn Ekrem|BOLD:AAC4099  
 Micropsectra notescens|To351|Torbjorn Ekrem|BOLD:AAC4099  
 Micropsectra notescens|To315|Elisabeth Sturj|BOLD:AAC4099  
 Micropsectra apposita|ZMUO.024288|Lauri Paasivirta|BOLD:AAC7823  
 Micropsectra contracta|TRD-CH257|Elisabeth Sturj|BOLD:AAC7823  
 Micropsectra contracta|To358|Torbjorn Ekrem|BOLD:AAC7823  
 Micropsectra|ZSM-DIP-33143-B05|Caroline Chimeno|BIN Taxonomy Match (Jan 2022)|BOLD:AAC7823  
 Micropsectra|ZSM-DIP-33134-B04|Caroline Chimeno|BIN Taxonomy Match (Jan 2022)|BOLD:AAC7823  
 Micropsectra contracta|GBOL11553|Sofia Wiedenbrug|Morphology|BOLD:AAC7823  
 Micropsectra|ZSM-DIP-33129-C11|Caroline Chimeno|BIN Taxonomy Match (Jan 2022)|BOLD:AAC7823  
 Micropsectra junci|NHRS-BYWS00000370|Yngve Brodin|morphology|BOLD:AAC7823  
 Micropsectra contracta|SOE283|Torbjorn Ekrem|BOLD:AAC7823  
 Micropsectra contracta|SOE50|Elisabeth Sturj|BOLD:AAC7823  
 Micropsectra|ZSM-DIP-33172-F03|Caroline Chimeno|BIN Taxonomy Match (Jan 2022)|BOLD:AAC7823  
 Micropsectra|ZSM-DIP-33130-G12|Caroline Chimeno|BIN Taxonomy Match (Jan 2022)|BOLD:AAC7823  
 Micropsectra|ZSM-DIP-33130-F08|Caroline Chimeno|BIN Taxonomy Match (Jan 2022)|BOLD:AAC7823  
 Micropsectra|ZSM-DIP-33130-F07|Caroline Chimeno|BIN Taxonomy Match (Jan 2022)|BOLD:AAC7823  
 Micropsectra|ZSM-DIP-33130-H01|Caroline Chimeno|BIN Taxonomy Match (Jan 2022)|BOLD:AAC7823  
 Micropsectra|ZSM-DIP-33143-B04|Caroline Chimeno|BIN Taxonomy Match (Jan 2022)|BOLD:AAC7823  
 Micropsectra|ZSM-DIP-33143-C03|Caroline Chimeno|BIN Taxonomy Match (Jan 2022)|BOLD:AAC7823  
 Micropsectra|ZSM-DIP-33143-C04|Caroline Chimeno|BIN Taxonomy Match (Jan 2022)|BOLD:AAC7823  
 Micropsectra|ZSM-DIP-33143-C05|Caroline Chimeno|BIN Taxonomy Match (Jan 2022)|BOLD:AAC7823  
 Micropsectra|ZSM-DIP-33135-G01|Caroline Chimeno|BIN Taxonomy Match (Jan 2022)|BOLD:AAC7823  
 Micropsectra|ZSM-DIP-33135-G02|Caroline Chimeno|BIN Taxonomy Match (Jan 2022)|BOLD:AAC7823  
 Micropsectra|ZSM-DIP-33145-D01|Caroline Chimeno|BIN Taxonomy Match (Jan 2022)|BOLD:AAC7823  
 Micropsectra|ZSM-DIP-33170-A07|Caroline Chimeno|BIN Taxonomy Match (Jan 2022)|BOLD:AAC7823  
 Micropsectra|ZSM-DIP-33170-A08|Caroline Chimeno|BIN Taxonomy Match (Jan 2022)|BOLD:AAC7823  
 Micropsectra|ZSM-DIP-33149-C07|Caroline Chimeno|BIN Taxonomy Match (Jan 2022)|BOLD:AAC7823  
 Micropsectra|ZSM-DIP-33134-B05|Caroline Chimeno|BIN Taxonomy Match (Jan 2022)|BOLD:AAC7823  
 Micropsectra|ZSM-DIP-33170-A01|Caroline Chimeno|BIN Taxonomy Match (Jan 2022)|BOLD:AAC7823  
 Micropsectra contracta|Finmark14|Elisabeth Sturj|BOLD:AAC7823  
 Micropsectra apposita|ZMUO.024289|Lauri Paasivirta|BOLD:AAC7823  
 Micropsectra contracta|TRD-CH256|Elisabeth Sturj|BOLD:AAC7823  
 Micropsectra contracta|BIOUG16331-D11|Kate Perez|BIN Taxonomy Match|BOLD:AAC7823  
 Micropsectra contracta|BIOUG16257-D11|Kate Perez|BIN Taxonomy Match|BOLD:AAC7823  
 Micropsectra contracta|CH-OSF46|Elisabeth Sturj|BOLD:AAC7823  
 Micropsectra contracta|Finmark10|Elisabeth Sturj|BOLD:AAC7823  
 Micropsectra contracta|To356|Torbjorn Ekrem|BOLD:AAC7823  
 Micropsectra contracta|To357|Torbjorn Ekrem|BOLD:AAC7823  
 Micropsectra|ZSM-DIP-33140-H08|Caroline Chimeno|BIN Taxonomy Match (Jan 2022)|BOLD:AAC7823  
 Micropsectra contracta|To06|Torbjorn Ekrem|BOLD:AAC7823  
 Micropsectra|BIOUG36819-E02|Kate Perez|BIN Taxonomy Match (Jul 2018)|BOLD:AAC4098  
 Micropsectra|ZSM-DIP-33170-C08|Caroline Chimeno|BIN Taxonomy Match (Jan 2022)|BOLD:AAC4098  
 Micropsectra notescens|To353|Torbjorn Ekrem|BOLD:AAC4098  
 Micropsectra|ZSM-DIP-33138-C07|Caroline Chimeno|BIN Taxonomy Match (Jan 2022)|BOLD:AAC4098  
 Micropsectra|BIOUG42659-C12|Kate Perez|BIN Taxonomy Match below Phylum (Jun 2019)|BOLD:A...  
 Micropsectra|BIOUG43948-D09|Kate Perez|BIN Taxonomy Match below Phylum (Jan 2019)|BOLD:A...  
 Micropsectra|ZSM-DIP-33129-E09|Caroline Chimeno|BIN Taxonomy Match (Jan 2022)|BOLD:AAC4098  
 Micropsectra notescens|ZMUO.024827|Lauri Paasivirta|BOLD:AAC4098  
 Micropsectra notescens|CH-OSF120|Elisabeth Sturj|BOLD:AAC4098  
 Micropsectra notescens|CH-OSF121|Elisabeth Sturj|BOLD:AAC4098  
 Micropsectra notescens|ZMUO.024298|Lauri Paasivirta|BOLD:AAC4098  
 Micropsectra apposita|ZMUO.024310|Lauri Paasivirta|BOLD:AAC4098  
 Micropsectra notescens|ZMUO.024828|Lauri Paasivirta|BOLD:AAC4098  
 Micropsectra notescens|CH-OSF52|Elisabeth Sturj|BOLD:AAC4098  
 Micropsectra notescens|CH-OSF47|Elisabeth Sturj|BOLD:AAC4098  
 Micropsectra notescens|BIOUG05108-G03|Kate Perez|BIN Taxonomy Match|BOLD:AAC4098  
 Micropsectra notescens|To354|Elisabeth Sturj|BOLD:AAC4098  
 Micropsectra notescens|To324|Elisabeth Sturj|BOLD:AAC4098

Micropsectra notescens|BIOUG05108-G03|Kate Perez|BIN Taxonomy Match|BOLD: AAC4098  
Micropsectra notescens|To354|Elisabeth Stur|BOLD: AAC4098  
Micropsectra notescens|To324|Elisabeth Stur|BOLD: AAC4098  
Micropsectra recurvata|TRD-CH1|Elisabeth Stur|BOLD: AAC4510  
Micropsectra recurvata|SOE45|Torbjorn Ekrem|BOLD: AAC4510  
Micropsectra recurvata|SOE254|Elisabeth Stur|BOLD: AAC4510  
Micropsectra recurvata|NHRS-BYWS00001156|Yngve Brodin|morphology|BOLD: AAC4510  
Micropsectra recurvata|SOE130|Elisabeth Stur|BOLD: AAC4510  
Micropsectra recurvata|SOE129|Elisabeth Stur|BOLD: AAC4510  
Micropsectra recurvata|ATNA1|Elisabeth Stur|BOLD: AAC4510  
Micropsectra recurvata|CH-OSF188|Elisabeth Stur|BOLD: AAC4510  
Micropsectra recurvata|Finmark236|Elisabeth Stur|BOLD: AAC4510  
Micropsectra recurvata|ZMUO.024526|Lauri Paasivirta|BOLD: AAC4510  
Micropsectra recurvata|CCDB24183-B09|Sofia Wiedenbrug|Morphology|BOLD: AAC4510  
Micropsectra recurvata|CCDB24183-B06|Sofia Wiedenbrug|Morphology|BOLD: AAC4510  
Micropsectra recurvata|ZMUO.024525|Lauri Paasivirta|BOLD: AAC4510  
Micropsectra recurvata|CCDB24183-B11|Sofia Wiedenbrug|BIN-taxonomy|BOLD: AAC4510  
Micropsectra recurvata|ATNA316|Elisabeth Stur|BOLD: AAC4510  
Micropsectra recurvata|SOE274|Elisabeth Stur|BOLD: AAC4510  
Micropsectra recurvata|To38|Torbjorn Ekrem|BOLD: AAC4510  
Chironomidae|ZSM-DIP-33139-C08|Caroline Chimeno|BIN Taxonomy Match (Jan 2022)|BOLD: ADS3982  
Chironomidae|ZSM-DIP-33128-E09|Valerie Levesque-Beaudin|BOLD ID Engine Manual (Sep 2021)|BO...  
Chironomidae|ZSM-DIP-33172-G06|Valerie Levesque-Beaudin|BIN Taxonomy Match (Sep 2021)|BOLD...  
Chironomidae|ZSM-DIP-33128-E08|Valerie Levesque-Beaudin|BIN Taxonomy Match (Sep 2021)|BOLD...  
Chironomidae|ZSM-DIP-33128-E11|Valerie Levesque-Beaudin|BIN Taxonomy Match (Sep 2021)|BOLD...  
Chironomidae|ZSM-DIP-33129-D08|Valerie Levesque-Beaudin|BIN Taxonomy Match (Sep 2021)|BOLD...  
Chironomidae|ZSM-DIP-33172-G05|Valerie Levesque-Beaudin|BIN Taxonomy Match (Sep 2021)|BOLD...  
Micropsectra junci|ZSM-DIP-33170-E12|Caroline Chimeno|BIN Taxonomy Match (Jan 2022)|BOLD ...  
Micropsectra junci|BIOUG04217-C07|Kate Perez|BIN Taxonomy Match|BOLD: AAA9962  
Micropsectra junci|ZSM-DIP-33133-H06|Caroline Chimeno|BIN Taxonomy Match (Jan 2022)|BOLD ...  
Micropsectra junci|SOE122|Torbjorn Ekrem|BOLD: AAA9962  
Micropsectra junci|SOE119|Torbjorn Ekrem|BOLD: AAA9962  
Micropsectra junci|SOE53|Torbjorn Ekrem|BOLD: AAA9962  
Micropsectra junci|SOE46|Torbjorn Ekrem|BOLD: AAA9962  
Micropsectra junci|To54|Torbjorn Ekrem|BOLD: AAA9962  
Micropsectra junci|ATNA42|Elisabeth Stur|BOLD: ABZ3274  
Micropsectra junci|SOE379|Torbjorn Ekrem|BOLD: ACE7506  
Micropsectra junci|SOE381|Torbjorn Ekrem|BOLD: ACE7506  
Micropsectra junci|SOE123|Torbjorn Ekrem|BOLD: ACE7506  
Micropsectra junci|SOE444|Torbjorn Ekrem|BOLD: ACE7506  
Micropsectra junci|SOE120|Torbjorn Ekrem|BOLD: ACE7506  
Micropsectra junci|SOE282|Torbjorn Ekrem|BOLD: ACE7506  
Micropsectra junci|SOE51|Elisabeth Stur|BOLD: ACE7506  
Micropsectra junci|ATNA164|Elisabeth Stur|BOLD: ACE7506  
Micropsectra junci|ATNA24|Elisabeth Stur|BOLD: ACE7506  
Micropsectra junci|ATNA324|Elisabeth Stur|BOLD: ACE7506  
Micropsectra junci|ATNA31|Elisabeth Stur|BOLD: ACE7506  
Micropsectra junci|ATNA51|Elisabeth Stur|BOLD: ACE7506  
Micropsectra junci|ATNA50|Elisabeth Stur|BOLD: ACE7506  
Micropsectra junci|ATNA45|Elisabeth Stur|BOLD: ACE7506  
Micropsectra junci|ATNA39|Elisabeth Stur|BOLD: ACE7506  
Micropsectra junci|ATNA40|Elisabeth Stur|BOLD: ACE7506  
Micropsectra junci|ATNA33|Elisabeth Stur|BOLD: ACE7506  
Micropsectra junci|ATNA32|Elisabeth Stur|BOLD: ACE7506  
Micropsectra junci|ZSM-DIP-33140-B10|Caroline Chimeno|BIN Taxonomy Match (Jan 2022)|BOLD ...  
Chironomidae|CCDB22603-E07|Sofia Wiedenbrug|no morphological identification - introduction of int...  
Chironomidae|CCDB22603-E11|Sofia Wiedenbrug|no morphological identification - introduction of int...  
Chironomidae|CCDB22603-E08|Sofia Wiedenbrug|no morphological identification - introduction of int...  
Chironomidae|CCDB22603-E12|Sofia Wiedenbrug|no morphological identification - introduction of int...  
Chironomidae|CCDB22603-E10|Sofia Wiedenbrug|no morphological identification - introduction of int...  
Chironomidae|CCDB22603-E06|Sofia Wiedenbrug|no morphological identification - introduction of int...  
Micropsectra junci|CCDB24183-C03|Sofia Wiedenbrug|BIN-taxonomy|BOLD: AAA9963  
Micropsectra junci|CCDB24183-B10|Sofia Wiedenbrug|BIN-taxonomy|BOLD: AAA9963  
Micropsectra junci|CCDB21606-A07|Sofia Wiedenbrug|BOLD: AAA9963  
Micropsectra junci|CCDB21606-G10|Sofia Wiedenbrug|BOLD: AAA9963  
Micropsectra junci|CCDB21606-C02|Sofia Wiedenbrug|BOLD: AAA9963  
Micropsectra junci|CCDB21606-H03|Sofia Wiedenbrug|BOLD: AAA9963  
Micropsectra junci|CCDB21606-C01|Sofia Wiedenbrug|BOLD: AAA9963  
Micropsectra junci|CCDB21606-B11|Sofia Wiedenbrug|BOLD: AAA9963  
Micropsectra junci|ZMUO.024555|Lauri Paasivirta|BOLD: AAA9963  
Micropsectra junci|CCDB24183-B08|Sofia Wiedenbrug|Morphology|BOLD: AAA9963  
Micropsectra junci|ZMUO.024556|Lauri Paasivirta|BOLD: AAA9963  
Micropsectra junci|CH-OSF17|Elisabeth Stur|BOLD: AAA9963  
Micropsectra junci|CCDB24183-H06|Sofia Wiedenbrug|BIN-taxonomy|BOLD: AAA9963  
Micropsectra junci|BIOUG05142-E05|Kate Perez|BIN Taxonomy Match|BOLD: AAA9963  
Micropsectra junci|CH-OSF53|Elisabeth Stur|BOLD: AAA9963  
Micropsectra junci|To157|Torbjorn Ekrem|BOLD: AAA9963  
Micropsectra junci|To154|Torbjorn Ekrem|BOLD: AAA9963  
Micropsectra junci|CCDB24183-B05|Sofia Wiedenbrug|Morphology|BOLD: AAA9963  
Micropsectra junci|BIOUG04433-E06|Kate Perez|BIN Taxonomy Match|BOLD: AAA9963  
Micropsectra junci|ATNA38|Elisabeth Stur|BOLD: AAA9963  
Micropsectra junci|Finmark349|Elisabeth Stur|BOLD: AAA9963  
Micropsectra junci|SOE445|Torbjorn Ekrem|BOLD: AAA9963  
Micropsectra junci|SOE127|Torbjorn Ekrem|BOLD: AAA9963  
Micropsectra junci|SOE118|Torbjorn Ekrem|BOLD: AAA9963  
Micropsectra junci|SOE121|Torbjorn Ekrem|BOLD: AAA9963  
Micropsectra junci|EBAl-Ch012|Elisabeth Stur|morphology|BOLD: AAA9963  
Micropsectra junci|Finmark640|Elisabeth Stur|BOLD: AAA9963  
Paratanytarsus|BIOUG55123-A05|Kate Perez|BIN Taxonomy Match (Oct 2020)|BOLD: AAD1485  
Paratanytarsus|BIOUG55153-H06|Kate Perez|BIN Taxonomy Match (Oct 2020)|BOLD: AAD1485  
Paratanytarsus|BIOUG36655-F07|Kate Perez|BIN Taxonomy Match (Jul 2018)|BOLD: AAD1485  
Paratanytarsus grimmii|To18|Torbjorn Ekrem|BOLD: AAD1485  
Paratanytarsus laccophilus|TRD-CH241|Elisabeth Stur|BOLD: AAC8842  
Paratanytarsus laccophilus|ZMUO.025368|Lauri Paasivirta|BOLD: AAC8842  
Paratanytarsus laccophilus|ZSM-DIP-33142-A10|Caroline Chimeno|BIN Taxonomy Match (Jan 2022)...  
Paratanytarsus laccophilus|TRD-CH23|Elisabeth Stur|BOLD: AAC8842  
Paratanytarsus laccophilus|CCDB21606-G04|Sofia Wiedenbrug|BOLD: AAC8842  
Paratanytarsus laccophilus|ZSM-DIP-33172-E12|Caroline Chimeno|BIN Taxonomy Match (Jan 2022)...  
Paratanytarsus laccophilus|ZMUO.025369|Lauri Paasivirta|BOLD: AAC8842  
Paratanytarsus laccophilus|TRD-CH363|Elisabeth Stur|morphology|BOLD: AAC8842  
Paratanytarsus laccophilus|TRD-CH339|Elisabeth Stur|morphology|BOLD: AAC8842  
Paratanytarsus laccophilus|RIN\_CH79|Mona Renate Saurasunet|BOLD Identification engine|BOLD: AAC...

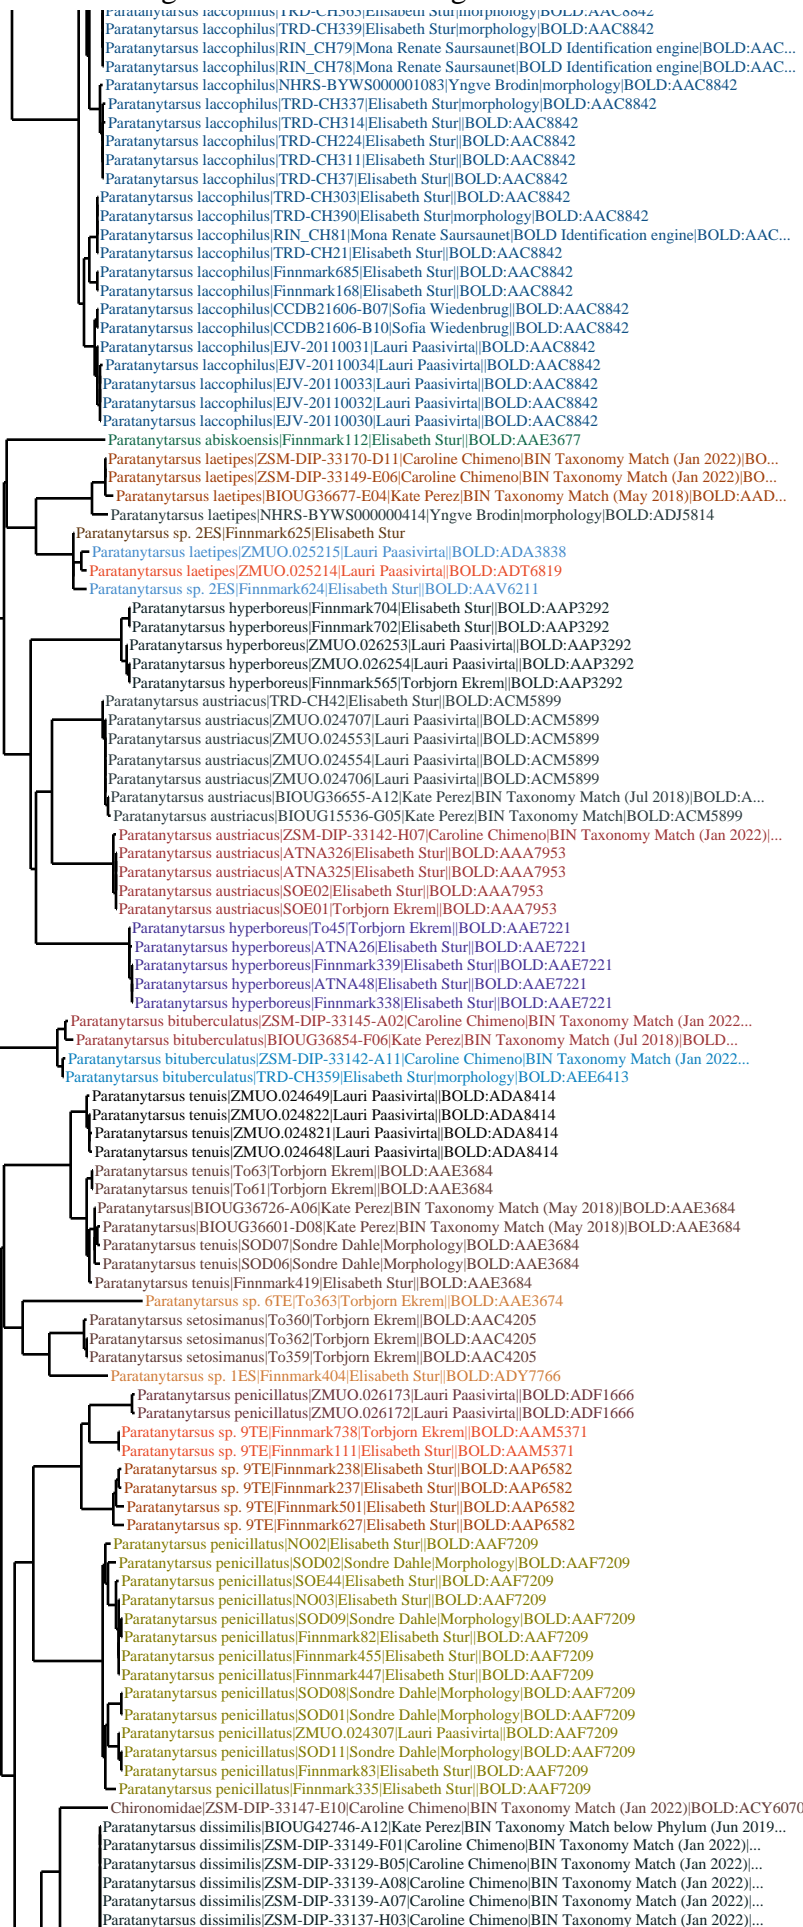

Paratanytarsus dissimilis|ZSM-DIP-33139-A08|Caroline Chimenó|BIN Taxonomy Match (Jan 2022)|...  
 Paratanytarsus dissimilis|ZSM-DIP-33139-A07|Caroline Chimenó|BIN Taxonomy Match (Jan 2022)|...  
 Paratanytarsus dissimilis|ZSM-DIP-33137-H03|Caroline Chimenó|BIN Taxonomy Match (Jan 2022)|...  
 Paratanytarsus dissimilis|ZSM-DIP-33134-E08|Caroline Chimenó|BIN Taxonomy Match (Jan 2022)|...  
 Paratanytarsus dissimilis|ZSM-DIP-33134-E09|Caroline Chimenó|BIN Taxonomy Match (Jan 2022)|...  
 Paratanytarsus dissimilis|NHRS-BYWS000000266|Yngve Brodin|morphology|BOLD:AAW4635  
 Tanytarsus pallidicornis|PP0261|Lauri Paasivirta|BOLD:AAW4635  
 Paratanytarsus dissimilis|ZMUO.024725|Lauri Paasivirta|BOLD:AAW4635  
 Paratanytarsus dissimilis|ZMUO.024724|Lauri Paasivirta|BOLD:AAW4635  
 Chironomidae|ZSM-DIP-33134-E11|Caroline Chimenó|BIN Taxonomy Match (Jan 2022)|BOLD:AAW4635  
 Paratanytarsus dissimilis|EJV-20110060|Lauri Paasivirta|BOLD:AAW4635  
 Paratanytarsus dissimilis|EJV-20110058|Lauri Paasivirta|BOLD:AAW4635  
 Paratanytarsus dissimilis|EJV-20110059|Lauri Paasivirta|BOLD:AAW4635  
 Paratanytarsus dissimilis|EJV-20110061|Lauri Paasivirta|BOLD:AAW4635  
 Paratanytarsus dissimilis|EJV-20110057|Lauri Paasivirta|BOLD:AAW4635  
 Paratanytarsus inopertus|NHRS-BYWS000000550|Yngve Brodin|morphology|BOLD:AAU1200  
 Paratanytarsus inopertus|NHRS-BYWS000001807|Yngve Brodin|BOLD:AAU1200  
 Paratanytarsus inopertus|NHRS-BYWS000000110|Yngve Brodin|morphology|BOLD:AAU1200  
 Paratanytarsus inopertus|NHRS-BYWS000000279|Yngve Brodin|morphology|BOLD:AAU1200  
 Paratanytarsus inopertus|NHRS-BYWS000001065|Yngve Brodin|morphology|BOLD:AAU1200  
 Paratanytarsus inopertus|ZMUO.024816|Lauri Paasivirta|BOLD:AAU1200  
 Paratanytarsus inopertus|ZMUO.024815|Lauri Paasivirta|BOLD:AAU1200  
 Chironominae|BIOUG36735-G02|Kate Perez|BIN Taxonomy Match (May 2018)|BOLD:AAU1200  
 Chironominae|BIOUG36992-H06|Kate Perez|BIN Taxonomy Match (Jul 2018)|BOLD:AAU1200  
 Paratanytarsus inopertus|NHRS-BYWS000001754|Yngve Brodin|BOLD:AAU1200  
 Paratanytarsus inopertus|NHRS-BYWS000001805|Yngve Brodin|BOLD:AAU1200  
 Paratanytarsus inopertus|NHRS-BYWS000001806|Yngve Brodin|BOLD:AAU1200  
 Paratanytarsus inopertus|NHRS-BYWS000001820|Yngve Brodin|BOLD:AAU1200  
 Paratanytarsus inopertus|NHRS-BYWS000001824|Yngve Brodin|BOLD:AAU1200  
 Paratanytarsus inopertus|NHRS-BYWS000000420|Yngve Brodin|morphology|BOLD:AAU1200  
 Paratanytarsus inopertus|NHRS-BYWS000000460|Yngve Brodin|morphology|BOLD:AAU1200  
 Paratanytarsus inopertus|NHRS-BYWS000000178|Yngve Brodin|morphology|BOLD:AAU1200  
 Paratanytarsus inopertus|NHRS-BYWS000000195|Yngve Brodin|morphology|BOLD:AAU1200  
 Paratanytarsus inopertus|NHRS-BYWS000000196|Yngve Brodin|morphology|BOLD:AAU1200  
 Paratanytarsus inopertus|NHRS-BYWS000000206|Yngve Brodin|morphology|BOLD:AAU1200  
 Paratanytarsus inopertus|NHRS-BYWS000000228|Yngve Brodin|morphology|BOLD:AAU1200  
 Paratanytarsus inopertus|NHRS-BYWS000000300|Yngve Brodin|morphology|BOLD:AAU1200  
 Paratanytarsus inopertus|NHRS-BYWS000000383|Yngve Brodin|morphology|BOLD:AAU1200  
 Paratanytarsus inopertus|NHRS-BYWS000001046|Yngve Brodin|morphology|BOLD:AAU1200  
 Paratanytarsus inopertus|NHRS-BYWS000001752|Yngve Brodin|BOLD:AAU1200  
 Chironomus plumosus|EJV-20110249|Lauri Paasivirta|BOLD:AAU1200  
 Polypedium scalaenum|ZSM-DIP-33131-E02|Caroline Chimenó|BIN Taxonomy Match (Jan 2022)|BOLD...  
 Chironomidae|BIOUG36677-D07|Kate Perez|BIN Taxonomy Match (May 2018)|BOLD:ACP4052  
 Polypedium scalaenum|NHRS-BYWS000001118|Yngve Brodin|morphology|BOLD:ADK1584  
 Polypedium scalaenum|NHRS-BYWS000001119|Yngve Brodin|morphology|BOLD:ADK1584  
 Phaenopsectra flavipes|ES19|Elisabeth Stur|BOLD:AAI4472  
 Phaenopsectra flavipes|ES20|Elisabeth Stur|BOLD:AAI4472  
 Phaenopsectra flavipes|ZSM-DIP-33129-A01|Caroline Chimenó|BIN Taxonomy Match (Jan 2022)|BOL...  
 Phaenopsectra flavipes|ZMUO.024236|Lauri Paasivirta|BOLD:AAU2481  
 Phaenopsectra flavipes|ZSM-DIP-33129-B01|Caroline Chimenó|BIN Taxonomy Match (Jan 2022)|BOL...  
 Phaenopsectra flavipes|TRD-CH172|Elisabeth Stur|BOLD:AAU2481  
 Phaenopsectra flavipes|TRD-CH319|Elisabeth Stur|BOLD:AAU2481  
 Phaenopsectra flavipes|TRD-CH318|Elisabeth Stur|BOLD:AAU2481  
 Phaenopsectra flavipes|TRD-CH136|Elisabeth Stur|morphology|BOLD:AAU2481  
 Phaenopsectra flavipes|ZSM-DIP-33145-F09|Caroline Chimenó|BIN Taxonomy Match (Jan 2022)|BOL...  
 Phaenopsectra flavipes|TRD-CH346|Elisabeth Stur|morphology|BOLD:AAU2481  
 Phaenopsectra flavipes|NHRS-BYWS000001843|Yngve Brodin|BOLD:AAU2481  
 Phaenopsectra flavipes|NHRS-BYWS000000427|Yngve Brodin|morphology|BOLD:AAU2481  
 Phaenopsectra flavipes|ZMUO.024237|Lauri Paasivirta|BOLD:AAU2481  
 Phaenopsectra flavipes|ZSM-DIP-33129-E05|Caroline Chimenó|BIN Taxonomy Match (Jan 2022)|BOL...  
 Phaenopsectra flavipes|NHRS-BYWS000001832|Yngve Brodin|BOLD:AAU2481  
 Phaenopsectra flavipes|EJV-20110081|Lauri Paasivirta|BOLD:AAU2481  
 Phaenopsectra flavipes|EJV-20110078|Lauri Paasivirta|BOLD:AAU2481  
 Phaenopsectra flavipes|ZSM-DIP-33136-G01|Caroline Chimenó|BIN Taxonomy Match (Jan 2022)|BOL...  
 Phaenopsectra flavipes|TRD-CH186|Elisabeth Stur|BOLD:AAU2481  
 Phaenopsectra flavipes|EJV-20110082|Lauri Paasivirta|BOLD:AAU2481  
 Phaenopsectra flavipes|EJV-20110083|Lauri Paasivirta|BOLD:AAU2481  
 Phaenopsectra flavipes|NHRS-BYWS000000125|Yngve Brodin|morphology|BOLD:AAU2481  
 Phaenopsectra flavipes|NHRS-BYWS0000001136|Yngve Brodin|morphology|BOLD:AAU2481  
 Phaenopsectra flavipes|TRD-CH361|Elisabeth Stur|morphology|BOLD:AAU2481  
 Phaenopsectra flavipes|EJV-20110079|Lauri Paasivirta|BOLD:AAU2481  
 Phaenopsectra flavipes|EJV-20110080|Lauri Paasivirta|BOLD:AAU2481  
 Polypedium quadriguttatum|NHRS-BYWS000000919|Yngve Brodin|morphology|BOLD:ACU9154  
 Polypedium quadriguttatum|NHRS-BYWS000000918|Yngve Brodin|morphology|BOLD:ACU9154  
 Polypedium simulans|Finmark734|Elisabeth Stur|BOLD:AAV2668  
 Polypedium quadriguttatum|ZMUO.025246|Lauri Paasivirta|BOLD:AAE4099  
 Polypedium quadriguttatum|ZMUO.025245|Lauri Paasivirta|BOLD:AAE4099  
 Polypedium|ZSM-DIP-33137-H04|Caroline Chimenó|BIN Taxonomy Match (Jan 2022)|BOLD:AAE4099  
 Polypedium quadriguttatum|NHRS-BYWS000001799|Yngve Brodin|BOLD:AAE4099  
 Polypedium scalaenum|ZMUO.025314|Lauri Paasivirta|BOLD:ADF1782  
 Polypedium scalaenum|ZMUO.025313|Lauri Paasivirta|BOLD:ADF1782  
 Polypedium asoprimum|song189|xxx Chao|Morphology|BOLD:AAV3408  
 Polypedium scalaenum|EJV-20110211|Lauri Paasivirta|BOLD:AAV3408  
 Polypedium tritum|ZMUO.024812|Lauri Paasivirta|BOLD:ADJ5715  
 Polypedium tritum|ZMUO.024811|Lauri Paasivirta|BOLD:ADJ5715  
 Polypedium tritum|ZMUO.024258|Lauri Paasivirta|BOLD:ADJ5715  
 Polypedium tritum|BIOUG36658-H06|Kate Perez|BIN Taxonomy Match (Jul 2018)|BOLD:ADJ5715  
 Polypedium uncinatum|NHRS-BYWS000000556|Yngve Brodin|morphology|BOLD:ADJ5716  
 Polypedium uncinatum|NHRS-BYWS000000555|Yngve Brodin|morphology|BOLD:ADJ5716  
 Polypedium uncinatum|NHRS-BYWS000000554|Yngve Brodin|morphology|BOLD:ADJ5716  
 Polypedium uncinatum|NHRS-BYWS000000553|Yngve Brodin|morphology|BOLD:ADJ5716  
 Polypedium uncinatum|NO37|Torbjorn Ekrem|BOLD:AAF0341  
 Polypedium uncinatum|NO35|Torbjorn Ekrem|BOLD:AAF0341  
 Polypedium uncinatum|NO34|Torbjorn Ekrem|BOLD:AAF0341  
 Polypedium uncinatum|NO33|Torbjorn Ekrem|BOLD:AAF0341  
 Polypedium tetracrenatum|ZMUO.025137|Lauri Paasivirta|BOLD:ADA7305  
 Polypedium tetracrenatum|ZMUO.025136|Lauri Paasivirta|BOLD:ADA7305  
 Polypedium|ZSM-DIP-33134-E07|Caroline Chimenó|BIN Taxonomy Match (Jan 2022)|BOLD:ACV3478  
 Polypedium tridens|CH141|BOLD:ACV3478  
 Polypedium bicrenatum|ZMUO.025352|Lauri Paasivirta|BOLD:ACV3478  
 Polypedium bicrenatum|NHRS-BYWS000000993|Yngve Brodin|morphology|BOLD:ACV3478  
 Polypedium bicrenatum|NHRS-BYWS000001120|Yngve Brodin|morphology|BOLD:ACV3478  
 Polypedium tridens|song193|xxx Chao|Morphology|BOLD:ACV3478

Polypedium bicrenatum|NHRS-BYWS00000993|Yngve Brodin|morphology|BOLD:ACV3478  
Polypedium bicrenatum|NHRS-BYWS00001120|Yngve Brodin|morphology|BOLD:ACV3478  
Polypedium tridens|song193|xxx Chao|Morphology|BOLD:ACV3478  
Polypedium tridens|song192|xxx Chao|Morphology|BOLD:ACV3478  
Polypedium bicrenatum|ZMUO.025351|Lauri Paasivirta|BOLD:ACV3478  
Polypedium|BIOUG36779-A10|Kate Perez|BIN Taxonomy Match (May 2018)|BOLD:ACV3478  
Polypedium bicrenatum|NHRS-BYWS00000506|Yngve Brodin|morphology|BOLD:ACV3478  
Polypedium bicrenatum|NHRS-BYWS00000291|Yngve Brodin|morphology|BOLD:ACV3478  
Polypedium bicrenatum|NHRS-BYWS00000442|Yngve Brodin|morphology|BOLD:ACV3478  
Polypedium bicrenatum|NHRS-BYWS00000404|Yngve Brodin|morphology|BOLD:ACV3478  
Polypedium trigonus|ZMUO.025346|Lauri Paasivirta|BOLD:AAV3587  
Polypedium trigonus|ZMUO.025345|Lauri Paasivirta|BOLD:AAV3587  
Polypedium trigonus|NHRS-BYWS00000557|Yngve Brodin|morphology|BOLD:AAV3587  
Polypedium trigonus|NHRS-BYWS00000558|Yngve Brodin|morphology|BOLD:AAV3587  
Polypedium trigonus|NHRS-BYWS00000459|Yngve Brodin|morphology|BOLD:AAV3587  
Polypedium sp. 3TE|CH-OSF171|Torbjorn Ekrem|BOLD:AAV3587  
Polypedium sordens|BIOUG36931-G07|Kate Perez|BIN Taxonomy Match (May 2018)|BOLD:ADF3485  
Polypedium sordens|NHRS-BYWS00001073|Yngve Brodin|morphology|BOLD:ACY3855  
Polypedium sordens|NHRS-BYWS00000325|Yngve Brodin|morphology|BOLD:ACY3855  
Polypedium sordens|CH153||BOLD:ACY3855  
Polypedium sordens|NHRS-BYWS00000324|Yngve Brodin|morphology|BOLD:ACY3855  
Polypedium sordens|NHRS-BYWS000001058|Yngve Brodin|morphology|BOLD:ACY3854  
Polypedium sordens|ZMUO.024938|Lauri Paasivirta|BOLD:ACY3854  
Polypedium sordens|ZMUO.024937|Lauri Paasivirta|BOLD:ACY3854  
Polypedium sordens|TRD-CH434|Elisabeth Sturj|morphology|BOLD:ACY3854  
Polypedium sordens|NHRS-BYWS00001049|Yngve Brodin|morphology|BOLD:ACY3854  
Polypedium sordens|song190|xxx Chao|Morphology|BOLD:ACY3854  
Polypedium sordens|CHAO48|xxx Chao|Morphology|BOLD:ACY3854  
Polypedium sordens|CHAO47|xxx Chao|Morphology|BOLD:ACY3854  
Paratendipes albimanus|BIOUG55145-G09|Stefan Schmidt|BIN Taxonomy Match (Sep 2020)|BOLD:AAO1037  
Paratendipes albimanus|ZSM-DIP-33133-B04|Caroline Chimeno|BIN Taxonomy Match (Jan 2022)|BOLD:AAO1037  
Paratendipes albimanus|NHRS-BYWS00000351|Yngve Brodin|morphology|BOLD:AAO1037  
Paratendipes albimanus|NHRS-BYWS00000503|Yngve Brodin|morphology|BOLD:AAO1037  
Paratendipes albimanus|ZSM-DIP-33131-D01|Caroline Chimeno|BIN Taxonomy Match (Jan 2022)|BOLD:AAO1037  
Paratendipes albimanus|NHRS-BYWS00000441|Yngve Brodin|morphology|BOLD:AAO1037  
Paratendipes albimanus|BIOUG55115-E06|Stefan Schmidt|BIN Taxonomy Match (Sep 2020)|BOLD:AAO1037  
Paratendipes albimanus|CH-eik22|Elisabeth Sturj|BOLD:AAO1037  
Paratendipes albimanus|ZSM-DIP-33145-G07|Caroline Chimeno|BIN Taxonomy Match (Jan 2022)|BOLD:AAO1037  
Paratendipes albimanus|BIOUG55119-D03|Stefan Schmidt|BIN Taxonomy Match (Sep 2020)|BOLD:AAO1037  
Paratendipes albimanus|ZSM-DIP-33146-E10|Caroline Chimeno|BIN Taxonomy Match (Jan 2022)|BOLD:AAO1037  
Paratendipes albimanus|CCDB22604-G04|Sofia Wiedenbrug|BOLD:AAO1037  
Paratendipes albimanus|BIOUG42670-B07|Kate Perez|BIN Taxonomy Match below Phylum (Jun 2019)|BOLD:AAO1037  
Paratendipes albimanus|BIOUG42704-G01|Kate Perez|BIN Taxonomy Match below Phylum (Jun 2019)|BOLD:AAO1037  
Paratendipes albimanus|BIOUG42687-D09|Kate Perez|BIN Taxonomy Match below Phylum (Jun 2019)|BOLD:AAO1037  
Paratendipes albimanus|BIOUG55115-D11|Stefan Schmidt|BIN Taxonomy Match (Sep 2020)|BOLD:AAO1037  
Paratendipes albimanus|ZSM-DIP-33144-F10|Caroline Chimeno|BIN Taxonomy Match (Jan 2022)|BOLD:AAO1037  
Paratendipes albimanus|BIOUG17096-B10|Kate Perez|BIN Taxonomy Match|BOLD:AAO1037  
Paratendipes albimanus|ZSM-DIP-33147-F12|Caroline Chimeno|BIN Taxonomy Match (Jan 2022)|BOLD:AAO1037  
Paratendipes albimanus|BIOUG42656-B02|Kate Perez|BIN Taxonomy Match below Phylum (Jun 2019)|BOLD:AAO1037  
Paratendipes albimanus|ZSM-DIP-33144-F11|Caroline Chimeno|BIN Taxonomy Match (Jan 2022)|BOLD:AAO1037  
Paratendipes albimanus|CCDB24228-G10|Sofia Wiedenbrug|BIN Taxonomy Match|BOLD:AAO1037  
Paratendipes albimanus|BIOUG42752-H01|Kate Perez|BIN Taxonomy Match below Phylum (Jun 2019)|BOLD:AAO1037  
Paratendipes albimanus|BIOUG55115-A04|Stefan Schmidt|BIN Taxonomy Match (Sep 2020)|BOLD:AAO1037  
Paratendipes albimanus|BIOUG55127-E12|Stefan Schmidt|BIN Taxonomy Match (Sep 2020)|BOLD:AAO1037  
Paratendipes albimanus|NHRS-BYWS00000398|Yngve Brodin|morphology|BOLD:AAO1037  
Paratendipes albimanus|NHRS-BYWS00000505|Yngve Brodin|morphology|BOLD:AAO1037  
Paratendipes albimanus|BIOUG55117-D09|Stefan Schmidt|BIN Taxonomy Match (Sep 2020)|BOLD:AAO1037  
Paratendipes albimanus|BIOUG55126-E07|Stefan Schmidt|BIN Taxonomy Match (Sep 2020)|BOLD:AAO1037  
Paratendipes albimanus|BIOUG55118-A08|Stefan Schmidt|BIN Taxonomy Match (Sep 2020)|BOLD:AAO1037  
Paratendipes albimanus|BIOUG55115-E02|Stefan Schmidt|BIN Taxonomy Match (Sep 2020)|BOLD:AAO1037  
Paratendipes albimanus|BIOUG55112-E02|Stefan Schmidt|BIN Taxonomy Match (Sep 2020)|BOLD:AAO1037  
Paratendipes albimanus|BIOUG55119-A06|Stefan Schmidt|BIN Taxonomy Match (Sep 2020)|BOLD:AAO1037  
Paratendipes albimanus|BIOUG55115-F09|Stefan Schmidt|BIN Taxonomy Match (Sep 2020)|BOLD:AAO1037  
Paratendipes albimanus|BIOUG55144-E06|Stefan Schmidt|BIN Taxonomy Match (Sep 2020)|BOLD:AAO1037  
Paratendipes albimanus|BIOUG55153-E10|Stefan Schmidt|BIN Taxonomy Match (Sep 2020)|BOLD:AAO1037  
Paratendipes albimanus|BIOUG42737-B07|Kate Perez|BIN Taxonomy Match below Phylum (Jun 2019)|BOLD:AAO1037  
Paratendipes albimanus|ZSM-DIP-33142-A08|Caroline Chimeno|BIN Taxonomy Match (Jan 2022)|BOLD:AAO1037  
Paratendipes albimanus|BIOUG42781-G09|Kate Perez|BIN Taxonomy Match below Phylum (Jun 2019)|BOLD:AAO1037  
Paratendipes albimanus|ZSM-DIP-33144-H07|Caroline Chimeno|BIN Taxonomy Match (Jan 2022)|BOLD:AAO1037  
Paratendipes albimanus|ZSM-DIP-33146-A01|Caroline Chimeno|BIN Taxonomy Match (Jan 2022)|BOLD:AAO1037  
Paratendipes albimanus|ZSM-DIP-33147-E08|Caroline Chimeno|BIN Taxonomy Match (Jan 2022)|BOLD:AAO1037  
Paratendipes albimanus|ZSM-DIP-33147-E09|Caroline Chimeno|BIN Taxonomy Match (Jan 2022)|BOLD:AAO1037  
Paratendipes albimanus|ZSM-DIP-33131-H02|Caroline Chimeno|BIN Taxonomy Match (Jan 2022)|BOLD:AAO1037  
Paratendipes albimanus|ZSM-DIP-33170-B05|Caroline Chimeno|BIN Taxonomy Match (Jan 2022)|BOLD:AAO1037  
Paratendipes albimanus|BIOUG42742-F05|Kate Perez|BIN Taxonomy Match below Phylum (Jun 2019)|BOLD:AAO1037  
Paratendipes albimanus|ZSM-DIP-33170-D09|Caroline Chimeno|BIN Taxonomy Match (Jan 2022)|BOLD:AAO1037  
Paratendipes albimanus|ZSM-DIP-33146-D06|Caroline Chimeno|BIN Taxonomy Match (Jan 2022)|BOLD:AAO1037  
Paratendipes albimanus|ZSM-DIP-33134-G12|Caroline Chimeno|BIN Taxonomy Match (Jan 2022)|BOLD:AAO1037  
Paratendipes albimanus|BC-ZSM-DIP-22491-H05|Dieter Doezkal|BOLD:AAO1037  
Paratendipes albimanus|BIOUG17305-H05|Kate Perez|BIN Taxonomy Match|BOLD:AAO1037  
Paratendipes albimanus|BIOUG17305-C08|Kate Perez|BIN Taxonomy Match|BOLD:AAO1037  
Paratendipes albimanus|ZSM-DIP-33143-A09|Caroline Chimeno|BIN Taxonomy Match (Jan 2022)|BOLD:AAO1037  
Paratendipes albimanus|BIOUG17095-E01|Kate Perez|BIN Taxonomy Match|BOLD:AAO1037  
Paratendipes albimanus|BIOUG42749-A09|Kate Perez|BIN Taxonomy Match below Phylum (Jun 2019)|BOLD:AAO1037  
Paratendipes albimanus|ZSM-DIP-33144-E11|Caroline Chimeno|BIN Taxonomy Match (Jan 2022)|BOLD:AAO1037  
Paratendipes albimanus|BIOUG17303-G01|Kate Perez|BIN Taxonomy Match|BOLD:AAO1037  
Paratendipes albimanus|BIOUG42739-H10|Kate Perez|BIN Taxonomy Match below Phylum (Jun 2019)|BOLD:AAO1037  
Paratendipes albimanus|ZSM-DIP-33145-G09|Caroline Chimeno|BIN Taxonomy Match (Jan 2022)|BOLD:AAO1037  
Paratendipes albimanus|BIOUG16647-C07|Kate Perez|BIN Taxonomy Match|BOLD:AAO1037  
Paratendipes albimanus|BIOUG16199-F08|Kate Perez|BIN Taxonomy Match|BOLD:AAO1037  
Paratendipes albimanus|TRD-CH110|Elisabeth Sturj|BOLD:AAO1037  
Paratendipes albimanus|BIOUG16296-B11|Kate Perez|BIN Taxonomy Match|BOLD:AAO1037  
Paratendipes albimanus|BIOUG16259-G04|Kate Perez|BIN Taxonomy Match|BOLD:AAO1037  
Paratendipes albimanus|BIOUG16632-G04|Kate Perez|BIN Taxonomy Match|BOLD:AAO1037  
Paratendipes albimanus|ZSM-DIP-33135-G05|Caroline Chimeno|BIN Taxonomy Match (Jan 2022)|BOLD:AAO1037  
Paratendipes albimanus|BIOUG15967-B05|Kate Perez|BIN Taxonomy Match|BOLD:AAO1037  
Paratendipes albimanus|BIOUG16299-F03|Kate Perez|BIN Taxonomy Match|BOLD:AAO1037  
Paratendipes albimanus|BIOUG16257-F12|Kate Perez|BIN Taxonomy Match|BOLD:AAO1037  
Paratendipes albimanus|BIOUG15954-E04|Kate Perez|BIN Taxonomy Match|BOLD:AAO1037  
Paratendipes albimanus|BIOUG15950-F01|Kate Perez|BIN Taxonomy Match|BOLD:AAO1037  
Paratendipes albimanus|BIOUG16261-D04|Kate Perez|BIN Taxonomy Match|BOLD:AAO1037  
Paratendipes albimanus|BIOUG15953-C05|Kate Perez|BIN Taxonomy Match|BOLD:AAO1037  
Paratendipes albimanus|BIOUG15952-E06|Kate Perez|BIN Taxonomy Match|BOLD:AAO1037

Paratendipes albimanus|BIOUG15953-F06|Kate Perez|BIN Taxonomy Match|BOLD:AAO1037  
Paratendipes albimanus|BIOUG15953-C05|Kate Perez|BIN Taxonomy Match|BOLD:AAO1037  
Paratendipes albimanus|BIOUG15952-F06|Kate Perez|BIN Taxonomy Match|BOLD:AAO1037  
Paratendipes albimanus|BIOUG44442-C01|Kate Perez|BIN Taxonomy Match below Phylum (Mar 2019)...  
Paratendipes albimanus|ZSM-DIP-33146-A02|Caroline Chimento|BIN Taxonomy Match (Jan 2022)|BOL...  
Paratendipes albimanus|BIOUG15964-A02|Kate Perez|BIN Taxonomy Match|BOLD:AAO1037  
Paratendipes albimanus|BIOUG16257-G11|Kate Perez|BIN Taxonomy Match|BOLD:AAO1037  
Paratendipes albimanus|NHRS-BYWS00000254|Yngve Brodin|morphology|BOLD:AAO1037  
Paratendipes albimanus|BIOUG16198-E05|Kate Perez|BIN Taxonomy Match|BOLD:AAO1037  
Paratendipes albimanus|BIOUG15950-G02|Kate Perez|BIN Taxonomy Match|BOLD:AAO1037  
Paratendipes albimanus|BIOUG15947-D10|Kate Perez|BIN Taxonomy Match|BOLD:AAO1037  
Paratendipes albimanus|BIOUG15951-F06|Kate Perez|BIN Taxonomy Match|BOLD:AAO1037  
Paratendipes albimanus|BIOUG15963-E11|Kate Perez|BIN Taxonomy Match|BOLD:AAO1037  
Paratendipes albimanus|BIOUG15953-E04|Kate Perez|BIN Taxonomy Match|BOLD:AAO1037  
Paratendipes albimanus|BIOUG15950-D05|Kate Perez|BIN Taxonomy Match|BOLD:AAO1037  
Paratendipes albimanus|BIOUG15951-B08|Kate Perez|BIN Taxonomy Match|BOLD:AAO1037  
Paratendipes albimanus|BIOUG15951-E08|Kate Perez|BIN Taxonomy Match|BOLD:AAO1037  
Paratendipes albimanus|BIOUG15967-B10|Kate Perez|BIN Taxonomy Match|BOLD:AAO1037  
Paratendipes albimanus|BIOUG16258-H06|Kate Perez|BIN Taxonomy Match|BOLD:AAO1037  
Paratendipes albimanus|BIOUG16299-G05|Kate Perez|BIN Taxonomy Match|BOLD:AAO1037  
Paratendipes albimanus|EJV-20110099|Lauri Paasivirta|BOLD:AAO1037  
Paratendipes albimanus|CH-eik128|Elisabeth Stur|BOLD:AAO1037  
Paratendipes albimanus|TRD-CH320|Elisabeth Stur|BOLD:AAO1037  
Paratendipes albimanus|ZMUO.025201|Lauri Paasivirta|BOLD:AAO1037  
Paratendipes albimanus|ZMUO.025200|Lauri Paasivirta|BOLD:AAO1037  
Paratendipes albimanus|BIOUG16631-G07|Kate Perez|BIN Taxonomy Match|BOLD:AAO1037  
Paratendipes albimanus|BIOUG15905-B09|Kate Perez|BIN Taxonomy Match|BOLD:AAO1037  
Paratendipes albimanus|EJV-20110097|Lauri Paasivirta|BOLD:AAO1037  
Paratendipes albimanus|EJV-20110100|Lauri Paasivirta|BOLD:AAO1037  
Paratendipes albimanus|EJV-20110101|Lauri Paasivirta|BOLD:AAO1037  
Paratendipes albimanus|ZSM-DIP-33172-F02|Caroline Chimento|BIN Taxonomy Match (Jan 2022)|BOL...  
Paratendipes albimanus|ZSM-DIP-33142-A07|Caroline Chimento|BIN Taxonomy Match (Jan 2022)|BOL...  
Paratendipes albimanus|ZSM-DIP-33144-C12|Caroline Chimento|BIN Taxonomy Match (Jan 2022)|BOL...  
Paratendipes albimanus|ZSM-DIP-33137-G04|Caroline Chimento|BIN Taxonomy Match (Jan 2022)|BOL...  
Paratendipes albimanus|ZSM-DIP-33149-E01|Caroline Chimento|BIN Taxonomy Match (Jan 2022)|BOL...  
Paratendipes albimanus|ZSM-DIP-33149-G11|Caroline Chimento|BIN Taxonomy Match (Jan 2022)|BOL...  
Paratendipes albimanus|ZSM-DIP-33172-F01|Caroline Chimento|BIN Taxonomy Match (Jan 2022)|BOL...  
Paratendipes albimanus|EJV-20110095|Lauri Paasivirta|BOLD:AAO1037  
Paratendipes albimanus|EJV-20110094|Lauri Paasivirta|BOLD:AAO1037  
Paratendipes albimanus|EJV-20110096|Lauri Paasivirta|BOLD:AAO1037  
Paratendipes albimanus|BIOUG16257-D12|Kate Perez|BIN Taxonomy Match|BOLD:AAO1037  
Paratendipes albimanus|BIOUG16261-H04|Kate Perez|BIN Taxonomy Match|BOLD:AAO1037  
Paratendipes albimanus|BIOUG16198-F08|Kate Perez|BIN Taxonomy Match|BOLD:AAO1037  
Paratendipes albimanus|BIOUG16198-D06|Kate Perez|BIN Taxonomy Match|BOLD:AAO1037  
Paratendipes albimanus|BIOUG16198-A02|Kate Perez|BIN Taxonomy Match|BOLD:AAO1037  
Paratendipes albimanus|BIOUG16330-A07|Kate Perez|BIN Taxonomy Match|BOLD:AAO1037  
Paratendipes albimanus|BIOUG15963-C08|Kate Perez|BIN Taxonomy Match|BOLD:AAO1037  
Paratendipes albimanus|BIOUG15954-H08|Kate Perez|BIN Taxonomy Match|BOLD:AAO1037  
Paratendipes albimanus|BIOUG15948-H08|Kate Perez|BIN Taxonomy Match|BOLD:AAO1037  
Paratendipes albimanus|BIOUG15948-G12|Kate Perez|BIN Taxonomy Match|BOLD:AAO1037  
Paratendipes albimanus|BIOUG15948-E07|Kate Perez|BIN Taxonomy Match|BOLD:AAO1037  
Paratendipes albimanus|BIOUG15948-B03|Kate Perez|BIN Taxonomy Match|BOLD:AAO1037  
Paratendipes albimanus|BIOUG15947-B09|Kate Perez|BIN Taxonomy Match|BOLD:AAO1037  
Paratendipes albimanus|BIOUG15905-F03|Kate Perez|BIN Taxonomy Match|BOLD:AAO1037  
Paratendipes albimanus|BIOUG15965-E10|Kate Perez|BIN Taxonomy Match|BOLD:AAO1037  
Paratendipes albimanus|BIOUG16198-G04|Kate Perez|BIN Taxonomy Match|BOLD:AAO1037  
Paratendipes albimanus|BIOUG15964-D01|Kate Perez|BIN Taxonomy Match|BOLD:AAO1037  
Paratendipes albimanus|BIOUG15967-A05|Kate Perez|BIN Taxonomy Match|BOLD:AAO1037  
Paratendipes albimanus|BIOUG15966-D06|Kate Perez|BIN Taxonomy Match|BOLD:AAO1037  
Paratendipes albimanus|BIOUG15964-G01|Kate Perez|BIN Taxonomy Match|BOLD:AAO1037  
Paratendipes albimanus|BIOUG15964-H07|Kate Perez|BIN Taxonomy Match|BOLD:AAO1037  
Paratendipes albimanus|BIOUG15964-H08|Kate Perez|BIN Taxonomy Match|BOLD:AAO1037  
Paratendipes albimanus|BIOUG15965-H04|Kate Perez|BIN Taxonomy Match|BOLD:AAO1037  
Paratendipes albimanus|BIOUG16256-E06|Kate Perez|BIN Taxonomy Match|BOLD:AAO1037  
Paratendipes albimanus|BIOUG16331-E11|Kate Perez|BIN Taxonomy Match|BOLD:AAO1037  
Paratendipes albimanus|BIOUG15905-A06|Kate Perez|BIN Taxonomy Match|BOLD:AAO1037  
Paratendipes albimanus|BIOUG16530-G01|Kate Perez|BIN Taxonomy Match|BOLD:AAO1037  
Paratendipes albimanus|BIOUG15950-F02|Kate Perez|BIN Taxonomy Match|BOLD:AAO1037  
Paratendipes albimanus|BIOUG15953-B02|Kate Perez|BIN Taxonomy Match|BOLD:AAO1037  
Paratendipes albimanus|BIOUG15952-D12|Kate Perez|BIN Taxonomy Match|BOLD:AAO1037  
Paratendipes albimanus|BIOUG15950-E12|Kate Perez|BIN Taxonomy Match|BOLD:AAO1037  
Paratendipes albimanus|BIOUG15954-B10|Kate Perez|BIN Taxonomy Match|BOLD:AAO1037  
Paratendipes albimanus|BIOUG15905-G11|Kate Perez|BIN Taxonomy Match|BOLD:AAO1037  
Paratendipes albimanus|BIOUG15963-H10|Kate Perez|BIN Taxonomy Match|BOLD:AAO1037  
Paratendipes albimanus|BIOUG16297-G11|Kate Perez|BIN Taxonomy Match|BOLD:AAO1037  
Paratendipes albimanus|BIOUG15905-D07|Kate Perez|BIN Taxonomy Match|BOLD:AAO1037  
Paratendipes albimanus|BIOUG15948-A08|Kate Perez|BIN Taxonomy Match|BOLD:AAO1037  
Paratendipes albimanus|BIOUG15948-H04|Kate Perez|BIN Taxonomy Match|BOLD:AAO1037  
Paratendipes albimanus|BIOUG15967-D01|Kate Perez|BIN Taxonomy Match|BOLD:AAO1037  
Paratendipes albimanus|BIOUG15965-A05|Kate Perez|BIN Taxonomy Match|BOLD:AAO1037  
Paratendipes albimanus|BIOUG15905-D03|Kate Perez|BIN Taxonomy Match|BOLD:AAO1037  
Paratendipes albimanus|BIOUG15905-D05|Kate Perez|BIN Taxonomy Match|BOLD:AAO1037  
Paratendipes albimanus|BIOUG15948-D09|Kate Perez|BIN Taxonomy Match|BOLD:AAO1037  
Paratendipes albimanus|BIOUG15954-C06|Kate Perez|BIN Taxonomy Match|BOLD:AAO1037  
Paratendipes albimanus|BIOUG15966-G12|Kate Perez|BIN Taxonomy Match|BOLD:AAO1037  
Paratendipes albimanus|BIOUG15967-D02|Kate Perez|BIN Taxonomy Match|BOLD:AAO1037  
Paratendipes albimanus|BIOUG15967-H07|Kate Perez|BIN Taxonomy Match|BOLD:AAO1037  
Paratendipes albimanus|BIOUG15951-H03|Kate Perez|BIN Taxonomy Match|BOLD:AAO1037  
Paratendipes albimanus|BIOUG16330-E01|Kate Perez|BIN Taxonomy Match|BOLD:AAO1037  
Paratendipes albimanus|BIOUG15900-H04|Kate Perez|BIN Taxonomy Match|BOLD:AAO1037  
Paratendipes albimanus|BIOUG15952-B01|Kate Perez|BIN Taxonomy Match|BOLD:AAO1037  
Paratendipes albimanus|BIOUG15967-G12|Kate Perez|BIN Taxonomy Match|BOLD:AAO1037  
Paratendipes albimanus|BIOUG15950-G06|Kate Perez|BIN Taxonomy Match|BOLD:AAO1037  
Paratendipes albimanus|BIOUG15953-G10|Kate Perez|BIN Taxonomy Match|BOLD:AAO1037  
Paratendipes albimanus|BIOUG15950-C08|Kate Perez|BIN Taxonomy Match|BOLD:AAO1037  
Paratendipes albimanus|BIOUG15948-G04|Kate Perez|BIN Taxonomy Match|BOLD:AAO1037  
Paratendipes albimanus|BIOUG15952-D01|Kate Perez|BIN Taxonomy Match|BOLD:AAO1037  
Paratendipes albimanus|BIOUG15950-E08|Kate Perez|BIN Taxonomy Match|BOLD:AAO1037  
Paratendipes albimanus|BIOUG15952-C08|Kate Perez|BIN Taxonomy Match|BOLD:AAO1037  
Paratendipes albimanus|EJV-20110098|Lauri Paasivirta|BOLD:AAO1037  
Paratendipes albimanus|BIOUG15966-F05|Kate Perez|BIN Taxonomy Match|BOLD:AAO1037  
Paratendipes albimanus|ZMUO.024856|Lauri Paasivirta|BOLD:AAV3590

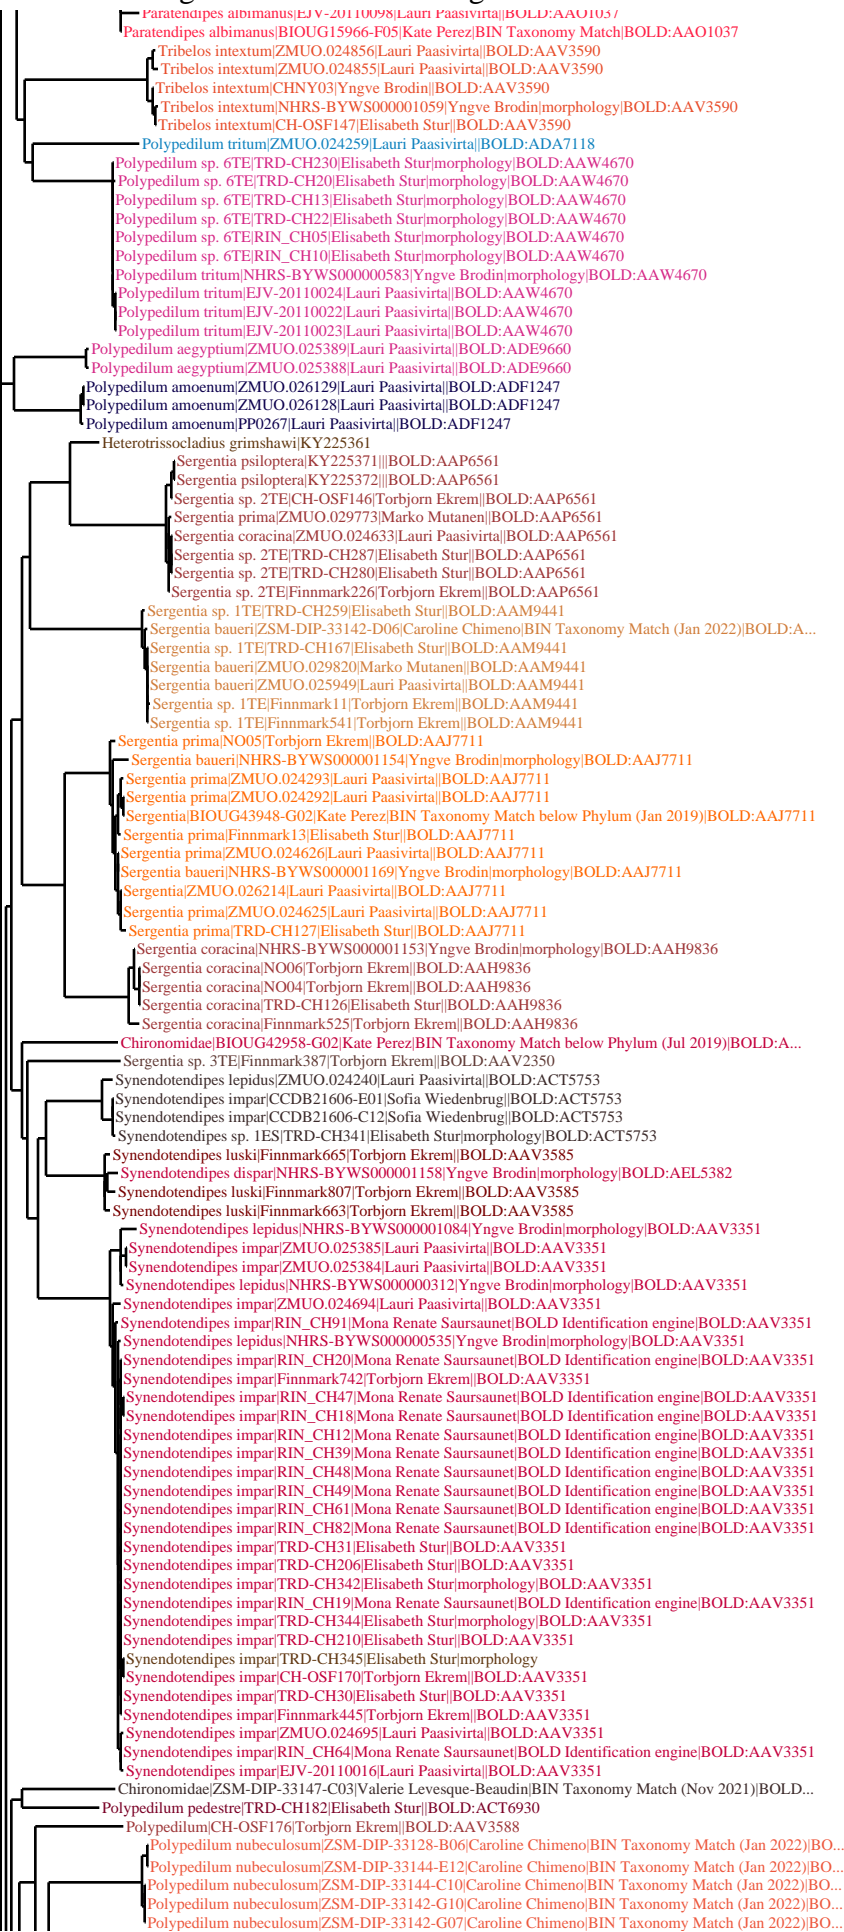

Polypedium nubeculosum|ZSM-DIP-33144-C10|Caroline Chimeno|BIN Taxonomy Match (Jan 2022)|BO...  
 Polypedium nubeculosum|ZSM-DIP-33142-G10|Caroline Chimeno|BIN Taxonomy Match (Jan 2022)|BO...  
 Polypedium nubeculosum|ZSM-DIP-33142-G07|Caroline Chimeno|BIN Taxonomy Match (Jan 2022)|BO...  
 Polypedium nubeculosum|BIOUG36761-C09|Kate Perez|BIN Taxonomy Match (Jul 2018)|BOLD:AER...  
 Polypedium nubeculosum|ZSM-DIP-33134-E02|Caroline Chimeno|BIN Taxonomy Match (Jan 2022)|BO...  
 Polypedium nubeculosum|NHRS-BYWS000001185|Yngve Brodin|morphology|BOLD:AER2796  
 Polypedium nubeculosum|ZMUO.024549|Lauri Paasivirta|BOLD:AA3395  
 Polypedium nubeculosum|ZMUO.024550|Lauri Paasivirta|BOLD:AA3395  
 Polypedium nubeculosum|NHRS-BYWS000001176|Yngve Brodin|morphology|BOLD:AA3395  
 Polypedium nubeculosum|BIOUG55120-G01|Kate Perez|BIN Taxonomy Match (Oct 2020)|BOLD:AA3...  
 Polypedium nubeculosum|NHRS-BYWS000001022|Yngve Brodin|morphology|BOLD:AA3395  
 Polypedium nubeculosum|song191|xxx Chao|Morphology|BOLD:AA3395  
 Polypedium nubeculosum|BIOUG36734-H11|Kate Perez|BIN Taxonomy Match (May 2018)|BOLD:AA3...  
 Polypedium nubeculosum|BIOUG37052-D04|Kate Perez|BIN Taxonomy Match (Jul 2018)|BOLD:AA3...  
 Polypedium nubeculosum|NHRS-BYWS000000906|Yngve Brodin|morphology|BOLD:AA3395  
 Polypedium nubeculosum|NHRS-BYWS000001844|Yngve Brodin|BOLD:AA3395  
 Polypedium albicorne|EBAI-Ch210|Elisabeth Stur|morphology  
 Polypedium albicorne|TRD-CH330|Elisabeth Stur|BOLD:AAL0178  
 Polypedium albicorne|ZMUO.024908|Lauri Paasivirta|BOLD:AAL0178  
 Polypedium albicorne|ZMUO.024909|Lauri Paasivirta|BOLD:AAL0178  
 Polypedium albicorne|BIOUG16601-A12|Kate Perez|BIN Taxonomy Match|BOLD:AAL0178  
 Polypedium albicorne|BIOUG15905-H06|Kate Perez|BIN Taxonomy Match|BOLD:AAL0178  
 Polypedium albicorne|BIOUG16597-B04|Kate Perez|BIN Taxonomy Match|BOLD:AAL0178  
 Polypedium albicorne|BIOUG15947-A05|Kate Perez|BIN Taxonomy Match|BOLD:AAL0178  
 Polypedium albicorne|BIOUG16198-B07|Kate Perez|BIN Taxonomy Match|BOLD:AAL0178  
 Polypedium albicorne|BIOUG15964-G05|Kate Perez|BIN Taxonomy Match|BOLD:AAL0178  
 Polypedium albicorne|BIOUG15951-C01|Kate Perez|BIN Taxonomy Match|BOLD:AAL0178  
 Polypedium albicorne|BIOUG15953-C09|Kate Perez|BIN Taxonomy Match|BOLD:AAL0178  
 Polypedium albicorne|BIOUG16476-G02|Kate Perez|BIN Taxonomy Match|BOLD:AAL0178  
 Polypedium albicorne|BIOUG16436-B08|Kate Perez|BIN Taxonomy Match|BOLD:AAL0178  
 Polypedium albicorne|BIOUG15953-C08|Kate Perez|BIN Taxonomy Match|BOLD:AAL0178  
 Polypedium albicorne|BIOUG15950-E04|Kate Perez|BIN Taxonomy Match|BOLD:AAL0178  
 Polypedium albicorne|BIOUG15950-C04|Kate Perez|BIN Taxonomy Match|BOLD:AAL0178  
 Polypedium albicorne|BIOUG15900-G06|Kate Perez|BIN Taxonomy Match|BOLD:AAL0178  
 Polypedium albicorne|Finnmark178|Elisabeth Stur|BOLD:AAL0178  
 Polypedium albicorne|ES75|Elisabeth Stur|BOLD:AAL0178  
 Polypedium albicorne|ZSM-DIP-33147-B12|Caroline Chimeno|BIN Taxonomy Match (Jan 2022)|BOLD...  
 Polypedium albicorne|ZSM-DIP-33142-F09|Caroline Chimeno|BIN Taxonomy Match (Jan 2022)|BOLD...  
 Polypedium albicorne|ZSM-DIP-33130-C11|Caroline Chimeno|BIN Taxonomy Match (Jan 2022)|BOLD...  
 Polypedium albicorne|ATNA535|Elisabeth Stur|BOLD:AAL0178  
 Polypedium albicorne|BIOUG16198-B04|Kate Perez|BIN Taxonomy Match|BOLD:AAL0178  
 Polypedium albicorne|BIOUG16596-G07|Kate Perez|BIN Taxonomy Match|BOLD:AAL0178  
 Polypedium albicorne|BIOUG16198-D05|Kate Perez|BIN Taxonomy Match|BOLD:AAL0178  
 Polypedium albicorne|BIOUG15905-F02|Kate Perez|BIN Taxonomy Match|BOLD:AAL0178  
 Polypedium albicorne|BIOUG16198-G02|Kate Perez|BIN Taxonomy Match|BOLD:AAL0178  
 Polypedium albicorne|BIOUG15964-A06|Kate Perez|BIN Taxonomy Match|BOLD:AAL0178  
 Polypedium albicorne|BIOUG16430-E07|Kate Perez|BIN Taxonomy Match|BOLD:AAL0178  
 Polypedium albicorne|BIOUG15952-B03|Kate Perez|BIN Taxonomy Match|BOLD:AAL0178  
 Polypedium albicorne|BIOUG16297-E07|Kate Perez|BIN Taxonomy Match|BOLD:AAL0178  
 Polypedium albicorne|BIOUG16205-C07|Kate Perez|BIN Taxonomy Match|BOLD:AAL0178  
 Polypedium albicorne|BIOUG15954-F08|Kate Perez|BIN Taxonomy Match|BOLD:AAL0178  
 Polypedium albicorne|BIOUG15948-A02|Kate Perez|BIN Taxonomy Match|BOLD:AAL0178  
 Polypedium albicorne|ZSM-DIP-33147-B08|Caroline Chimeno|BIN Taxonomy Match (Jan 2022)|BOLD...  
 Polypedium albicorne|TRD-CH192|Elisabeth Stur|BOLD:AAL0178  
 Polypedium albicorne|Finnmark889|Elisabeth Stur|BOLD:AAL0178  
 Polypedium albicorne|EBAI-Ch188|Elisabeth Stur|morphology|BOLD:AAL0178  
 Polypedium albicorne|BIOUG15905-D09|Kate Perez|BIN Taxonomy Match|BOLD:AAL0178  
 Polypedium albicorne|BIOUG16597-A09|Kate Perez|BIN Taxonomy Match|BOLD:AAL0178  
 Polypedium albicorne|BIOUG15954-G03|Kate Perez|BIN Taxonomy Match|BOLD:AAL0178  
 Polypedium albicorne|BIOUG15947-F11|Kate Perez|BIN Taxonomy Match|BOLD:AAL0178  
 Polypedium albicorne|BIOUG15963-F04|Kate Perez|BIN Taxonomy Match|BOLD:AAL0178  
 Polypedium albicorne|BIOUG15949-A09|Kate Perez|BIN Taxonomy Match|BOLD:AAL0178  
 Polypedium albicorne|BIOUG15954-B08|Kate Perez|BIN Taxonomy Match|BOLD:AAL0178  
 Polypedium albicorne|BIOUG16198-E02|Kate Perez|BIN Taxonomy Match|BOLD:AAL0178  
 Polypedium albicorne|BIOUG16207-E10|Kate Perez|BIN Taxonomy Match|BOLD:AAL0178  
 Polypedium albicorne|BIOUG16205-A07|Kate Perez|BIN Taxonomy Match|BOLD:AAL0178  
 Polypedium albicorne|BIOUG15950-D09|Kate Perez|BIN Taxonomy Match|BOLD:AAL0178  
 Polypedium albicorne|BIOUG15967-B07|Kate Perez|BIN Taxonomy Match|BOLD:AAL0178  
 Polypedium albicorne|BIOUG15963-C03|Kate Perez|BIN Taxonomy Match|BOLD:AAL0178  
 Polypedium albicorne|BIOUG15950-A02|Kate Perez|BIN Taxonomy Match|BOLD:AAL0178  
 Polypedium albicorne|BIOUG16259-F01|Kate Perez|BIN Taxonomy Match|BOLD:AAL0178  
 Polypedium albicorne|BIOUG15951-B04|Kate Perez|BIN Taxonomy Match|BOLD:AAL0178  
 Polypedium albicorne|BIOUG16596-B11|Kate Perez|BIN Taxonomy Match|BOLD:AAL0178  
 Polypedium albicorne|BIOUG15953-G02|Kate Perez|BIN Taxonomy Match|BOLD:AAL0178  
 Polypedium albicorne|BIOUG15951-F09|Kate Perez|BIN Taxonomy Match|BOLD:AAL0178  
 Polypedium albicorne|BIOUG15900-G03|Kate Perez|BIN Taxonomy Match|BOLD:AAL0178  
 Polypedium albicorne|ATNA551|Elisabeth Stur|BOLD:AAL0178  
 Polypedium albicorne|ATNA534|Elisabeth Stur|BOLD:AAL0178  
 Polypedium albicorne|BIOUG08127-E12|Kate Perez|BIN Taxonomy Match|BOLD:AAL0178  
 Polypedium albicorne|BIOUG05899-B02|Kate Perez|BIN Taxonomy Match|BOLD:AAL0178  
 Polypedium albicorne|BIOUG07807-H06|Kate Perez|BIN Taxonomy Match|BOLD:AAL0178  
 Polypedium albicorne|TRD-CH329|Elisabeth Stur|BOLD:AAL0178  
 Polypedium albicorne|CCDB21606-G05|Sofia Wiedenbrug|BOLD:AAL0178  
 Polypedium albicorne|BIOUG16198-A11|Kate Perez|BIN Taxonomy Match|BOLD:AAL0178  
 Polypedium albicorne|BIOUG15966-H02|Kate Perez|BIN Taxonomy Match|BOLD:AAL0178  
 Polypedium albicorne|BIOUG15954-F11|Kate Perez|BIN Taxonomy Match|BOLD:AAL0178  
 Polypedium albicorne|BIOUG15951-H11|Kate Perez|BIN Taxonomy Match|BOLD:AAL0178  
 Polypedium albicorne|BIOUG15964-E11|Kate Perez|BIN Taxonomy Match|BOLD:AAL0178  
 Polypedium albicorne|BIOUG16198-B10|Kate Perez|BIN Taxonomy Match|BOLD:AAL0178  
 Polypedium albicorne|BIOUG16596-C07|Kate Perez|BIN Taxonomy Match|BOLD:AAL0178  
 Polypedium albicorne|BIOUG16526-D06|Kate Perez|BIN Taxonomy Match|BOLD:AAL0178  
 Polypedium albicorne|BIOUG08257-F09|Kate Perez|BIN Taxonomy Match|BOLD:AAL0178  
 Polypedium albicorne|BIOUG15966-H06|Kate Perez|BIN Taxonomy Match|BOLD:AAL0178  
 Polypedium albicorne|BIOUG15954-D10|Kate Perez|BIN Taxonomy Match|BOLD:AAL0178  
 Polypedium albicorne|BIOUG15952-A02|Kate Perez|BIN Taxonomy Match|BOLD:AAL0178  
 Polypedium albicorne|BIOUG16328-C05|Kate Perez|BIN Taxonomy Match|BOLD:AAL0178  
 Polypedium albicorne|BIOUG15952-H04|Kate Perez|BIN Taxonomy Match|BOLD:AAL0178  
 Polypedium albicorne|BIOUG15951-B09|Kate Perez|BIN Taxonomy Match|BOLD:AAL0178  
 Polypedium albicorne|BIOUG15951-H06|Kate Perez|BIN Taxonomy Match|BOLD:AAL0178  
 Polypedium albicorne|BIOUG08314-D01|Kate Perez|BIN Taxonomy Match|BOLD:AAL0178  
 Tribelos|ZMUO.026011|Lauri Paasivirta|BOLD:ADF1087  
 Tribelos|ZMUO.026012|Lauri Paasivirta|BOLD:ADF1087  
 Fndr-chironomus albinensis|NHRS-BYWS000000534|Yngve Brodin|morphology|BOLD:ACD8095



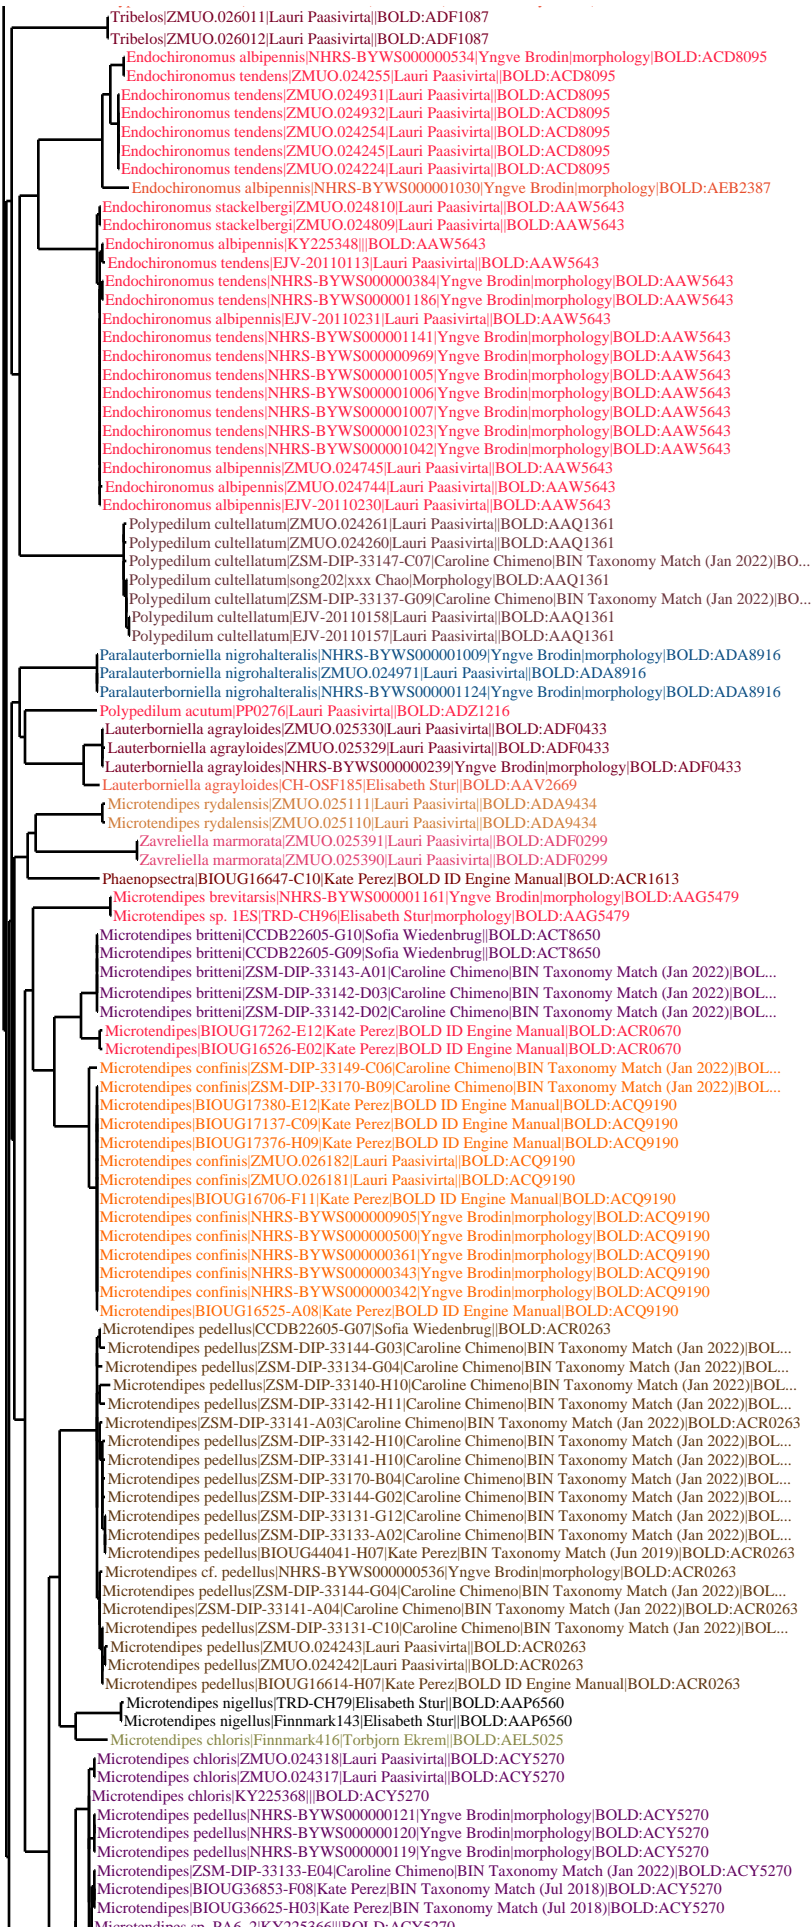

Microtendipes[BIOUG36853-F08]Kate Perez|BIN Taxonomy Match (Jul 2018)|BOLD:ACY5270  
 Microtendipes[BIOUG36625-H03]Kate Perez|BIN Taxonomy Match (Jul 2018)|BOLD:ACY5270  
 Microtendipes sp. PA6\_2|KY225366||BOLD:ACY5270  
 Microtendipes sp. PA6|KY225367||BOLD:ACY5270  
 Microtendipes sp. PA3|KY225364||BOLD:ACY5270  
 Microtendipes sp. PA5|KY225365||BOLD:ACY5270  
 Microtendipes brevitarsis|Finmark654|Elisabeth Stur||BOLD:AAM6832  
 Microtendipes brevitarsis|TRD-CH262|Elisabeth Stur||BOLD:AAM6832  
 Microtendipes brevitarsis|TRD-CH78|Elisabeth Stur||BOLD:AAM6832  
 Microtendipes brevitarsis|Finmark52|Torbjorn Ekrem||BOLD:AAM6832  
 Microtendipes brevitarsis|ZMUO.024611|Lauri Paasivirta||BOLD:AAM6832  
 Microtendipes brevitarsis|ZMUO.024610|Lauri Paasivirta||BOLD:AAM6832  
 Microtendipes brevitarsis|TRD-CH300|Elisabeth Stur||BOLD:AAM6832  
 Microtendipes brevitarsis|TRD-CH264|Elisabeth Stur||BOLD:AAM6832  
 Microtendipes brevitarsis|TRD-CH263|Elisabeth Stur||BOLD:AAM6832  
 Microtendipes brevitarsis|TRD-CH426|Elisabeth Stur|morphology|BOLD:AAM6832  
 Microtendipes brevitarsis|TRD-CH425|Elisabeth Stur|morphology|BOLD:AAM6832  
 Microtendipes brevitarsis|TRD-CH424|Elisabeth Stur|morphology|BOLD:AAM6832  
 Microtendipes brevitarsis|TRD-CH92|Elisabeth Stur||BOLD:AAM6832  
 Microtendipes brevitarsis|Finmark78|Elisabeth Stur||BOLD:AAM6832  
 Microtendipes brevitarsis|Finmark343|Elisabeth Stur||BOLD:AAM6832  
 Microtendipes pedellus|NO 85|Elisabeth Stur||BOLD:ABY3509  
 Microtendipes pedellus|TRD-CH80|Elisabeth Stur||BOLD:ABY3509  
 Microtendipes pedellus|EJV-20110045|Lauri Paasivirta||BOLD:ABY3509  
 Microtendipes pedellus|EJV-20110040|Lauri Paasivirta||BOLD:ABY3509  
 Microtendipes pedellus|EJV-20110042|Lauri Paasivirta||BOLD:ABY3509  
 Microtendipes pedellus|EJV-20110043|Lauri Paasivirta||BOLD:ABY3509  
 Microtendipes pedellus|EJV-20110044|Lauri Paasivirta||BOLD:ABY3509  
 Microtendipes pedellus|EJV-20110046|Lauri Paasivirta||BOLD:ABY3509  
 Microtendipes pedellus|NHRS-BYWS000001818|Yngve Brodin||BOLD:ABY3509  
 Microtendipes pedellus|NHRS-BYWS000001850|Yngve Brodin||BOLD:ABY3509  
 Microtendipes cf. chloris|GBOL03729|Sofia Wiedenbrug|Morphology  
 Microtendipes pedellus|CH-OSF74|Elisabeth Stur||BOLD:ABY3509  
 Microtendipes pedellus|EJV-20110041|Lauri Paasivirta||BOLD:ABY3509  
 Microtendipes pedellus|EJV-20110039|Lauri Paasivirta||BOLD:ABY3509  
 Microtendipes pedellus|EJV-20110038|Lauri Paasivirta||BOLD:ABY3509  
 Microtendipes pedellus|EJV-20110037|Lauri Paasivirta||BOLD:ABY3509  
 Microtendipes cf. chloris|GBOL03727|Sofia Wiedenbrug|Morphology|BOLD:ABY3509  
 Microtendipes pedellus|NO 83|Elisabeth Stur||BOLD:ABY3509  
 Polypedium tuberculum|TRD-CH364|Elisabeth Stur|morphology|BOLD:ACS2704  
 Phaenopsectra punctipes|NHRS-BYWS00000186|Yngve Brodin|morphology|BOLD:ACM9259  
 Polypedium laetum|ZMUO.026239|Lauri Paasivirta||BOLD:ADD3129  
 Polypedium laetum|ZMUO.026238|Lauri Paasivirta||BOLD:ADD3129  
 Polypedium laetum|ZSM-DIP-33147-A07|Caroline Chimenó|BIN Taxonomy Match (Jan 2022)|BOLD ...  
 Polypedium laetum|ZSM-DIP-33143-H06|Caroline Chimenó|BIN Taxonomy Match (Jan 2022)|BOLD ...  
 Polypedium laetum|ZSM-DIP-33149-G01|Caroline Chimenó|BIN Taxonomy Match (Jan 2022)|BOLD ...  
 Polypedium laetum|ZSM-DIP-33142-G02|Caroline Chimenó|BIN Taxonomy Match (Jan 2022)|BOLD ...  
 Polypedium|ZSM-DIP-33144-A01|Caroline Chimenó|BIN Taxonomy Match (Jan 2022)|BOLD:ACP9495  
 Polypedium[BIOUG16620-F03]Kate Perez|BIN Taxonomy Match|BOLD:ACP9495  
 Polypedium[BIOUG16298-B04]Kate Perez|BIN Taxonomy Match (Aug 2017)|BOLD:ACP9495  
 Polypedium cultellatum|TRD-CH310|Elisabeth Stur||BOLD:ACX5929  
 Polypedium cultellatum|Finmark592|Torbjorn Ekrem||BOLD:AAH7761  
 Phaenopsectra punctipes|ZMUO.024253|Lauri Paasivirta||BOLD:ADA9022  
 Phaenopsectra punctipes|ZMUO.024252|Lauri Paasivirta||BOLD:ADA9022  
 Phaenopsectra punctipes|ZMUO.024808|Lauri Paasivirta||BOLD:AAQ2147  
 Phaenopsectra punctipes|ZMUO.024807|Lauri Paasivirta||BOLD:AAQ2147  
 Phaenopsectra punctipes|Finmark456|Elisabeth Stur||BOLD:AAQ2147  
 Phaenopsectra punctipes|CCDB21606-B05|Sofia Wiedenbrug||BOLD:AAQ2147  
 Phaenopsectra punctipes|TRD-CH347|Elisabeth Stur|morphology|BOLD:AAQ2147  
 Phaenopsectra punctipes|Finmark589|Elisabeth Stur||BOLD:AAQ2147  
 Omisus caledonicus|ZMUO.024942|Lauri Paasivirta||BOLD:ADA8363  
 Omisus caledonicus|ZMUO.024941|Lauri Paasivirta||BOLD:ADA8363  
 Polypedium nubens|GBOL02189|Martin Spies||BOLD:ACN9463  
 Polypedium pullum|SOE161|Torbjorn Ekrem||BOLD:AAH7744  
 Polypedium pullum|BIOUG43948-F07|Kate Perez|BIN Taxonomy Match below Phylum (Jan 2019)|BOL...  
 Polypedium pullum|CH-OSF153|Elisabeth Stur||BOLD:AAH7744  
 Polypedium pullum|SOE162|Torbjorn Ekrem||BOLD:AAH7744  
 Polypedium sp. 4TE|TRD-CH274|Elisabeth Stur|morphology|BOLD:ACX4956  
 Polypedium pullum|ZMUO.029789|Marko Mutanen||BOLD:ACX4956  
 Polypedium pullum|ZMUO.024671|Lauri Paasivirta||BOLD:ACX4956  
 Polypedium pullum|ZMUO.024670|Lauri Paasivirta||BOLD:ACX4956  
 Polypedium pullum|ZMUO.024857|Lauri Paasivirta||BOLD:ACX4956  
 Polypedium pullum|ZMUO.024858|Lauri Paasivirta||BOLD:ACX4956  
 Polypedium sp. 4TE|TRD-CH271|Elisabeth Stur|morphology|BOLD:ACX4956  
 Polypedium sp. 4TE|TRD-CH270|Elisabeth Stur|morphology|BOLD:ACX4956  
 Polypedium albinodus|TRD-CH328|Elisabeth Stur||BOLD:AAM9576  
 Polypedium albinodus|TRD-CH327|Elisabeth Stur||BOLD:AAM9576  
 Polypedium albinodus|Finmark121|Torbjorn Ekrem||BOLD:AAM9576  
 Polypedium[BIOUG15948-D02]Kate Perez|BIN Taxonomy Match|BOLD:AAM9576  
 Polypedium pullum|ZMUO.024790|Lauri Paasivirta||BOLD:AAM9576  
 Polypedium[BIOUG15947-C07]Kate Perez|BIN Taxonomy Match|BOLD:AAM9576  
 Polypedium[BIOUG44442-D01]Kate Perez|BIN Taxonomy Match below Phylum (Mar 2019)|BOLD:AA...  
 Polypedium[BIOUG16257-E03]Kate Perez|BIN Taxonomy Match|BOLD:AAM9576  
 Polypedium[BIOUG16430-E10]Kate Perez|BIN Taxonomy Match|BOLD:AAM9576  
 Polypedium[BIOUG15953-B09]Kate Perez|BIN Taxonomy Match|BOLD:AAM9576  
 Polypedium[BIOUG16261-A04]Kate Perez|BIN Taxonomy Match|BOLD:AAM9576  
 Polypedium[BIOUG15966-B06]Kate Perez|BIN Taxonomy Match|BOLD:AAM9576  
 Polypedium[BIOUG15952-E09]Kate Perez|BIN Taxonomy Match|BOLD:AAM9576  
 Polypedium[BIOUG15950-C10]Kate Perez|BIN Taxonomy Match|BOLD:AAM9576  
 Polypedium[BIOUG15950-D03]Kate Perez|BIN Taxonomy Match|BOLD:AAM9576  
 Polypedium[BIOUG15949-F10]Kate Perez|BIN Taxonomy Match|BOLD:AAM9576  
 Polypedium[BIOUG15905-E12]Kate Perez|BIN Taxonomy Match|BOLD:AAM9576  
 Polypedium pullum|EJV-20110219|Lauri Paasivirta||BOLD:AAM9576  
 Polypedium pullum|ZMUO.024791|Lauri Paasivirta||BOLD:AAW4728  
 Polypedium sp. 5TE|NO 82|Elisabeth Stur|morphology|BOLD:AAW4728  
 Polypedium pullum|EJV-20110218|Lauri Paasivirta||BOLD:AAW4728  
 Synendotendipes lepidus|ZMUO.024241|Lauri Paasivirta||BOLD:ACX4393  
 Synendotendipes lepidus|TRD-CH305|Elisabeth Stur||BOLD:ACX4393  
 Synendotendipes dispar|ZMUO.026141|Lauri Paasivirta||BOLD:ABW6010  
 Synendotendipes dispar|ZMUO.026140|Lauri Paasivirta||BOLD:ABW6010  
 Chironomidae|BI2019\_B04|Bart Peeters|BOLD ID-Engine|BOLD:ABW6010  
 Chironomidae|BI2019\_K01|Knut Andreas Eikland|BOLD ID-Engine|BOLD:ABW6010

Synendotendipes dispar|ZMUO.026140|Lauri Paasivirta|BOLD:ABW6010  
 Chironomidae|BI2019\_B04|Bart Peeters|BOLD ID-Engine|BOLD:ABW6010  
 Chironomidae|BI2019\_K01|Knut Andreas Eikland|BOLD ID-Engine|BOLD:ABW6010  
 Synendotendipes dispar|TRD-CH306|Elisabeth Stur|BOLD:ABW6010  
 Chironominae|BI2019\_E04|Erlend I. F. Fossen|BOLD ID-Engine|BOLD:ABW6010  
 Stictochironomus sticticus|To49|Torbjorn Ekrem|BOLD:AAP3558  
 Stictochironomus sticticus|TRD-CH281|Elisabeth Stur|BOLD:AAP3558  
 Stictochironomus sticticus|Finmark202|Torbjorn Ekrem|BOLD:AAP3558  
 Stictochironomus pictulus|ZMUO.025173|Lauri Paasivirta|BOLD:ADE9888  
 Stictochironomus pictulus|ZMUO.025172|Lauri Paasivirta|BOLD:ADE9888  
 Stictochironomus sticticus|ZMUO.024599|Lauri Paasivirta|BOLD:AAM9673  
 Stictochironomus sticticus|ZMUO.024598|Lauri Paasivirta|BOLD:AAM9673  
 Stictochironomus sticticus|ZMUO.024316|Lauri Paasivirta|BOLD:AAM9673  
 Stictochironomus sticticus|ZMUO.024315|Lauri Paasivirta|BOLD:AAM9673  
 Stictochironomus sp. 3TE|Finmark51|Elisabeth Stur|Morphology|BOLD:AAM9673  
 Stictochironomus pictulus|NHRS-BYWS000001113|Yngve Brodin|morphology|BOLD:ACO4514  
 Stictochironomus maculipennis|ATNA568|Elisabeth Stur|BOLD:ACO4514  
 Stictochironomus maculipennis|ATNA569|Elisabeth Stur|BOLD:ACO4514  
 Stictochironomus maculipennis|TRD-CH113|Elisabeth Stur|BOLD:ACO4514  
 Stictochironomus pictulus|NHRS-BYWS000001114|Yngve Brodin|morphology|BOLD:ACO4514  
 Stictochironomus maculipennis|TRD-CH321|Elisabeth Stur|BOLD:ACO4514  
 Stictochironomus maculipennis|TRD-CH322|Elisabeth Stur|BOLD:ACO4514  
 Stictochironomus maculipennis|TRD-CH95|Elisabeth Stur|BOLD:ACO4514  
 Stictochironomus rosenscholdi|ZMUO.024304|Lauri Paasivirta|BOLD:AEM3172  
 Stictochironomus rosenscholdi|ZMUO.024303|Lauri Paasivirta|BOLD:AEM3172  
 Stictochironomus rosenscholdi|Finmark653|Torbjorn Ekrem|BOLD:AAV3350  
 Stictochironomus rosenscholdi|ZMUO.024596|Lauri Paasivirta|BOLD:AAV3350  
 Stictochironomus rosenscholdi|ZMUO.024597|Lauri Paasivirta|BOLD:AAV3350  
 Stictochironomus rosenscholdi|Finmark527|Torbjorn Ekrem|BOLD:AAV3350  
 Stictochironomus pictulus|ZMUO.024721|Lauri Paasivirta|BOLD:ADA9115  
 Stictochironomus pictulus|ZMUO.024720|Lauri Paasivirta|BOLD:ADA9115  
 Stictochironomus sp. 2TE|Finmark108|Elisabeth Stur|BOLD:AAM6830  
 Stictochironomus sp. 2TE|Finmark782|Torbjorn Ekrem|BOLD:AAM6830  
 Stictochironomus sp. 2TE|Finmark781|Elisabeth Stur|BOLD:AAM6830  
 Stictochironomus sp. 2TE|Finmark385|Torbjorn Ekrem|BOLD:AAM6830  
 Polypedium|BIOUG16529-H09|Kate Perez|BOLD ID Engine Manual|BOLD:ACR0701  
 Polypedium|BIOUG16529-D06|Kate Perez|BOLD ID Engine Manual|BOLD:ACR0701  
 Polypedium convictum|CCDB22605-E04|Sofia Wiedenbrug|BOLD:ACT9278  
 Polypedium convictum|ZSM-DIP-33137-G10|Caroline Chimenò|BIN Taxonomy Match (Jan 2022)|BOLD:AAW4661  
 Polypedium convictum|ZMUO.024911|Lauri Paasivirta|BOLD:AAW4661  
 Polypedium convictum|ZMUO.024910|Lauri Paasivirta|BOLD:AAW4661  
 Polypedium convictum|ZSM-DIP-33134-G08|Caroline Chimenò|BIN Taxonomy Match (Jan 2022)|BOLD:AAW4661  
 Polypedium convictum|BIOUG16529-F11|Kate Perez|BIN Taxonomy Match|BOLD:AAW4661  
 Polypedium convictum|BIOUG16529-B04|Kate Perez|BIN Taxonomy Match|BOLD:AAW4661  
 Polypedium convictum|TRD-CH404|Elisabeth Stur|morphology|BOLD:AAW4661  
 Polypedium convictum|TRD-CH193|Elisabeth Stur|Morphology|BOLD:AAW4661  
 Polypedium convictum|BIOUG16270-D10|Kate Perez|BIN Taxonomy Match|BOLD:AAW4661  
 Polypedium convictum|EJV-20110156|Lauri Paasivirta|BOLD:AAW4661  
 Tanytarsus pseudoheudensis|ES79|Xiaolong Lin|Morphology|BOLD:ACX8267  
 Tanytarsus pseudoheudensis|ES77|Xiaolong Lin|Morphology|BOLD:ACX8267  
 Tanytarsus anderseni|Finmark110|Elisabeth Stur|BOLD:AAM9625  
 Tanytarsus anderseni|Finmark142|Elisabeth Stur|BOLD:AEC7035  
 Tanytarsus anderseni|Finmark146|Elisabeth Stur|BOLD:AEC7035  
 Tanytarsus anderseni|Finmark380|Elisabeth Stur|BOLD:AEC7035  
 Polypedium arundineti|Finmark170|Torbjorn Ekrem|BOLD:AAP6452  
 Polypedium arundineti|NO 86|Elisabeth Stur|BOLD:AAP6452  
 Polypedium arundineti|TRD-CH432|Elisabeth Stur|morphology|BOLD:AAP6452  
 Polypedium arundineti|CH142||BOLD:AAP6452  
 Polypedium arundineti|ZMUO.024263|Lauri Paasivirta|BOLD:AAP6452  
 Polypedium arundineti|ZMUO.024262|Lauri Paasivirta|BOLD:AAP6452  
 Polypedium arundineti|CH143||BOLD:AAP6452  
 Polypedium arundineti|TRD-CH433|Elisabeth Stur|morphology|BOLD:AAP6452  
 Polypedium arundineti|RIN\_CH24|Mona Renate Saurasunet|BOLD Identification engine|BOLD:AAP6452  
 Polypedium arundineti|NO 81|Elisabeth Stur|BOLD:AAP6452  
 Nilothauma brayi|ZMUO.025387|Lauri Paasivirta|BOLD:ADF1066  
 Nilothauma brayi|ZMUO.025386|Lauri Paasivirta|BOLD:ADF1066  
 Polypedium octopunctatum|CCDB21605-H10|Sofia Wiedenbrug|BOLD:ACT2194  
 Tanytarsus pallidicornis|ZSM-DIP-33145-F11|Caroline Chimenò|BIN Taxonomy Match (Jan 2022)|B...  
 Tanytarsus pallidicornis|BIOUG55125-E05|Kate Perez|BIN Taxonomy Match (Oct 2020)|BOLD:AC...  
 Tanytarsus pallidicornis|ZSM-DIP-33138-C11|Caroline Chimenò|BIN Taxonomy Match (Jan 2022)|B...  
 Tanytarsus pallidicornis|ZSM-DIP-33142-G08|Caroline Chimenò|BIN Taxonomy Match (Jan 2022)|B...  
 Tanytarsus pallidicornis|ZSM-DIP-33142-G03|Caroline Chimenò|BIN Taxonomy Match (Jan 2022)|B...  
 Tanytarsus pallidicornis|ZSM-DIP-33129-A08|Caroline Chimenò|BIN Taxonomy Match (Jan 2022)|B...  
 Tanytarsus pallidicornis|ZSM-DIP-33129-A09|Caroline Chimenò|BIN Taxonomy Match (Jan 2022)|B...  
 Tanytarsus pallidicornis|ZSM-DIP-33145-B10|Caroline Chimenò|BIN Taxonomy Match (Jan 2022)|B...  
 Tanytarsus pallidicornis|ZSM-DIP-33145-B11|Caroline Chimenò|BIN Taxonomy Match (Jan 2022)|B...  
 Tanytarsus pallidicornis|BIOUG36658-B06|Kate Perez|BIN Taxonomy Match (Jul 2018)|BOLD:AC...  
 Tanytarsus pallidicornis|BIOUG36625-F12|Kate Perez|BIN Taxonomy Match (Jul 2018)|BOLD:AC...  
 Tanytarsus pallidicornis|BIOUG36680-D03|Kate Perez|BIN Taxonomy Match (May 2018)|BOLD:AC...  
 Tanytarsus pallidicornis|BIOUG36680-E12|Kate Perez|BIN Taxonomy Match (May 2018)|BOLD:AC...  
 Tanytarsus pallidicornis|BIOUG36625-D06|Kate Perez|BIN Taxonomy Match (Jul 2018)|BOLD:AC...  
 Tanytarsus pallidicornis|TRD-CH153|Elisabeth Stur|morphology|BOLD:ACR3318  
 Tanytarsus pallidicornis|TRD-CH150|Torbjorn Ekrem|morphology|BOLD:ACR3318  
 Pagastiella orophila|ZMUO.025134|Lauri Paasivirta|BOLD:AAV6386  
 Pagastiella orophila|ZMUO.025135|Lauri Paasivirta|BOLD:AAV6386  
 Pagastiella orophila|Finmark668|Elisabeth Stur|BOLD:AAV6386  
 Pagastiella orophila|NHRS-BYWS000000405|Yngve Brodin|morphology|BOLD:AAV6386  
 Pagastiella orophila|Finmark683|Elisabeth Stur|BOLD:AAV6386  
 Pagastiella orophila|Finmark451|Elisabeth Stur|Morphology|BOLD:AAV6386  
 Pagastiella orophila|Finmark449|Elisabeth Stur|Morphology|BOLD:AAV6386  
 Pagastiella orophila|Finmark348|Elisabeth Stur|Morphology|BOLD:AAV6386  
 Pagastiella orophila|Finmark347|Elisabeth Stur|Morphology|BOLD:AAV6386  
 Pagastiella orophila|TRD-CH62|Elisabeth Stur|Morphology|BOLD:AAV6386  
 Pagastiella orophila|Finmark420|Elisabeth Stur|BOLD:AAV6386  
 Pagastiella orophila|NO 87|Elisabeth Stur|BOLD:AAV6386  
 Xenochironomus xenolabis|ZMUO.025365|Lauri Paasivirta|BOLD:ACD6724  
 Cyphomella cornea|ZSM-DIP-33149-F12|Caroline Chimenò|BIN Taxonomy Match (Jan 2022)|BOLD:...  
 Cyphomella cornea|ZSM-DIP-33147-A06|Paul Hebert|Barcode Match|BOLD:AA19470  
 Cyphomella cornea|ZSM-DIP-33147-A04|Paul Hebert|Barcode Match|BOLD:AA19470  
 Ablabesmyia monilis|KY225347||BOLD:AAW4818  
 Xenochironomus xenolabis|EJV-20110160|Lauri Paasivirta|BOLD:AAW4818  
 Xenochironomus xenolabis|NHRS-BYWS000000496|Yngve Brodin|morphology|BOLD:AAW4818  
 Xenochironomus xenolabis|NHRS-BYWS000000938|Yngve Brodin|morphology|BOLD:AAW4818

Xenochironomus xenolabis[EJV-20110160]Lauri Paasivirta[BOLD:AAW4818  
Xenochironomus xenolabis[NHRS-BYWS00000496]Yngve Brodin[morphology]BOLD:AAW4818  
Xenochironomus xenolabis[NHRS-BYWS00000938]Yngve Brodin[morphology]BOLD:AAW4818  
Xenochironomus xenolabis[NHRS-BYWS00000939]Yngve Brodin[morphology]BOLD:AAW4818  
Xenochironomus xenolabis[NHRS-BYWS00000960]Yngve Brodin[morphology]BOLD:AAW4818  
Xenochironomus xenolabis[ZMUO.025364]Lauri Paasivirta[BOLD:AAW4818  
Xenochironomus xenolabis[EJV-20110159]Lauri Paasivirta[BOLD:AAW4818  
Kiefferulus tendipediformis[NHRS-BYWS00000315]Yngve Brodin[morphology]BOLD:AAW4677  
Kiefferulus tendipediformis[NHRS-BYWS00000316]Yngve Brodin[morphology]BOLD:AAW4677  
Kiefferulus tendipediformis[ZSM-DIP-33144-C09]Caroline Chimenó[BIN Taxonomy Match (Jan 2022 ...  
Kiefferulus tendipediformis[CH-OSF79]Elisabeth Sturj[BOLD:AAW4677  
Kiefferulus tendipediformis[NHRS-BYWS00000579]Yngve Brodin[morphology]BOLD:AAW4677  
Kiefferulus tendipediformis[NHRS-BYWS000001031]Yngve Brodin[morphology]BOLD:AAW4677  
Kiefferulus tendipediformis[ZMUO.025207]Lauri Paasivirta[BOLD:AAW4677  
Kiefferulus tendipediformis[NHRS-BYWS00000578]Yngve Brodin[morphology]BOLD:AAW4677  
Kiefferulus tendipediformis[EJV-20110025]Lauri Paasivirta[BOLD:AAW4677  
Kiefferulus tendipediformis[EJV-20110036]Lauri Paasivirta[BOLD:AAW4677  
Kiefferulus tendipediformis[EJV-20110035]Lauri Paasivirta[BOLD:AAW4677  
Kiefferulus tendipediformis[EJV-20110027]Lauri Paasivirta[BOLD:AAW4677  
Kiefferulus tendipediformis[EJV-20110029]Lauri Paasivirta[BOLD:AAW4677  
Kiefferulus tendipediformis[EJV-20110028]Lauri Paasivirta[BOLD:AAW4677  
Kiefferulus tendipediformis[EJV-20110026]Lauri Paasivirta[BOLD:AAW4677  
Demeijerea rufipes[ZMUO.026188]Lauri Paasivirta[BOLD:ADE9782  
Demeijerea rufipes[NHRS-BYWS000001101]Yngve Brodin[morphology]BOLD:ADE9782  
Demeijerea rufipes[ZMUO.026187]Lauri Paasivirta[BOLD:ADE9782  
Demeijerea rufipes[NHRS-BYWS000001003]Yngve Brodin[morphology]BOLD:ADE9782  
Chironominae[CCDB24229-H02]Sofia Wiedenbrug[BIN Taxonomy Match]BOLD:ACU4989  
Chironominae[BIOUG05945-E06]Kate Perez[BIN Taxonomy Match]BOLD:ACG4027  
Saetheria[EBAI-Ch243]Elisabeth Sturj[morphology]BOLD:ADF3948  
Saetheria[EBAI-Ch244]Elisabeth Sturj[morphology]BOLD:ADF3948  
Saetheria[EBAI-Ch242]Elisabeth Sturj[morphology]BOLD:ADF3948  
Saetheria[EBAI-Ch175]Elisabeth Sturj[morphology]BOLD:ADF3948  
Saetheria[EBAI-Ch174]Elisabeth Sturj[morphology]BOLD:ADF3948  
Saetheria tytus[Finnmark733]Torbjorn Ekrem[BOLD:AAV6406  
Paracladopelma nigriritulum[ZMUO.024718]Lauri Paasivirta[BOLD:ADA5651  
Paracladopelma winnelli[Finnmark727]Torbjorn Ekrem[BOLD:AAK4963  
Paracladopelma winnelli[Finnmark35]Torbjorn Ekrem[BOLD:AAM6831  
Glyptotendipes scirpi[ZMUO.024948]Lauri Paasivirta[BOLD:ACD5799  
Glyptotendipes scirpi[ZMUO.024947]Lauri Paasivirta[BOLD:ACD5799  
Glyptotendipes imbecillis[NHRS-BYWS00000990]Yngve Brodin[morphology]BOLD:ADK5078  
Glyptotendipes imbecillis[NHRS-BYWS000001085]Yngve Brodin[morphology]BOLD:ADK5078  
Glyptotendipes imbecillis[ZMUO.026131]Lauri Paasivirta[BOLD:ACD5349  
Glyptotendipes imbecillis[ZMUO.026130]Lauri Paasivirta[BOLD:ACD5349  
Glyptotendipes imbecillis[NHRS-BYWS000001067]Yngve Brodin[morphology]BOLD:ACD5349  
Paracladopelma camptolabis[ZMUO.024638]Lauri Paasivirta[BOLD:ACT5340  
Paracladopelma camptolabis[ZSM-DIP-33128-H07]Caroline Chimenó[BIN Taxonomy Match (Jan 2022)...  
Paracladopelma[PK-186-33]Petra Kranzfelder[morphology]BOLD:ACT5340  
Paracladopelma[PK-186-32]Petra Kranzfelder[morphology]BOLD:ACT5340  
Paracladopelma camptolabis[TRD-CH369]Elisabeth Sturj[morphology]BOLD:ACT5340  
Dicrotendipes nervosus[IM\_SSL205V\_30]Piotr Gadawski[Morphology]BOLD:AAU1021  
Dicrotendipes nervosus[DIC\_LOB\_IM\_SSL205V\_30]Piotr Gadawski[Morphology]BOLD:AAU1021  
Dicrotendipes nervosus[LA\_LSLD5\_95]Piotr Gadawski[BOLD:AAU1021  
Dicrotendipes nervosus[LA\_LSLD1\_123]Piotr Gadawski[BOLD:AAU1021  
Dicrotendipes nervosus[PU\_LSLP7\_294]Piotr Gadawski[BOLD:AAU1021  
Dicrotendipes nervosus[DIC\_NER\_IM\_VR9X14\_39]Piotr Gadawski[Morphology]BOLD:AAU1021  
Dicrotendipes nervosus[LA\_LSLP5\_166]Piotr Gadawski[BOLD:AAU1021  
Dicrotendipes nervosus[LA\_LSLD5\_302]Piotr Gadawski[BOLD:AAU1021  
Dicrotendipes nervosus[LA\_LSLD1\_124]Piotr Gadawski[BOLD:AAU1021  
Dicrotendipes nervosus[LA\_LSLP8\_111]Piotr Gadawski[BOLD:AAU1021  
Dicrotendipes nervosus[BIOUG52512-D12]Kate Perez[BIN Taxonomy Match (Mar 2020)]BOLD:AAU1021  
Dicrotendipes nervosus[LA\_LSLD1\_8]Piotr Gadawski[BOLD:AAU1021  
Dicrotendipes nervosus[ZSM-DIP-33129-A02]Caroline Chimenó[BIN Taxonomy Match (Jan 2022)]BOLD:AAU1021  
Dicrotendipes nervosus[ZSM-DIP-33128-H08]Caroline Chimenó[BIN Taxonomy Match (Jan 2022)]BOLD:AAU1021  
Dicrotendipes nervosus[ZSM-DIP-33134-E04]Caroline Chimenó[BIN Taxonomy Match (Jan 2022)]BOLD:AAU1021  
Dicrotendipes nervosus[BIOUG36735-D03]Kate Perez[BIN Taxonomy Match (May 2018)]BOLD:AAU1021  
Dicrotendipes nervosus[EJV-20110117]Lauri Paasivirta[BOLD:AAU1021  
Dicrotendipes nervosus[EJV-20110114]Lauri Paasivirta[BOLD:AAU1021  
Dicrotendipes nervosus[BIOUG42780-E07]Kate Perez[BIN Taxonomy Match below Phylum (Jun 2019)]...  
Dicrotendipes nervosus[ZSM-DIP-33170-D04]Caroline Chimenó[BIN Taxonomy Match (Jan 2022)]BOLD:AAU1021  
Dicrotendipes nervosus[NHRS-BYWS00000298]Yngve Brodin[morphology]BOLD:AAU1021  
Dicrotendipes nervosus[NHRS-BYWS00000126]Yngve Brodin[morphology]BOLD:AAU1021  
Dicrotendipes nervosus[NHRS-BYWS00000127]Yngve Brodin[morphology]BOLD:AAU1021  
Dicrotendipes nervosus[NHRS-BYWS000001026]Yngve Brodin[morphology]BOLD:AAU1021  
Dicrotendipes nervosus[NHRS-BYWS000001875]Yngve Brodin[BOLD:AAU1021  
Dicrotendipes nervosus[EJV-20110116]Lauri Paasivirta[BOLD:AAU1021  
Dicrotendipes nervosus[NHRS-BYWS000001819]Yngve Brodin[BOLD:AAU1021  
Dicrotendipes nervosus[NHRS-BYWS000001792]Yngve Brodin[BOLD:AAU1021  
Dicrotendipes nervosus[BIOUG36776-A03]Kate Perez[BIN Taxonomy Match (Jul 2018)]BOLD:AAU1021  
Dicrotendipes nervosus[BIOUG36653-C09]Kate Perez[BIN Taxonomy Match (Jul 2018)]BOLD:AAU1021  
Dicrotendipes nervosus[EJV-20110115]Lauri Paasivirta[BOLD:AAU1021  
Dicrotendipes nervosus[NHRS-BYWS00000447]Yngve Brodin[morphology]BOLD:AAU1021  
Dicrotendipes nervosus[NHRS-BYWS000001874]Yngve Brodin[BOLD:AAU1021  
Dicrotendipes nervosus[NHRS-BYWS000001848]Yngve Brodin[BOLD:AAU1021  
Dicrotendipes nervosus[NHRS-BYWS000001793]Yngve Brodin[BOLD:AAU1021  
Dicrotendipes nervosus[NHRS-BYWS00000237]Yngve Brodin[morphology]BOLD:AAU1021  
Dicrotendipes nervosus[NHRS-BYWS00000910]Yngve Brodin[morphology]BOLD:AAU1021  
Glyptotendipes[ZSM-DIP-33135-A01]Caroline Chimenó[BIN Taxonomy Match (Jan 2022)]BOLD:ACD...  
Chironomidae[KY225337  
Glyptotendipes nr. paripes[CH152]BOLD:ACD4470  
Glyptotendipes pallens[NHRS-BYWS000001001]Yngve Brodin[morphology]BOLD:ACD4470  
Glyptotendipes pallens[NHRS-BYWS00000927]Yngve Brodin[morphology]BOLD:ACD4470  
Glyptotendipes pallens[NHRS-BYWS00000245]Yngve Brodin[morphology]BOLD:ACD4470  
Glyptotendipes pallens[NHRS-BYWS00000246]Yngve Brodin[morphology]BOLD:ACD4470  
Glyptotendipes nr. paripes[ZMUO.024764]Lauri Paasivirta[BOLD:ACD4470  
Glyptotendipes pallens[NHRS-BYWS000001002]Yngve Brodin[morphology]BOLD:ACD4470  
Glyptotendipes pallens[NHRS-BYWS00000247]Yngve Brodin[morphology]BOLD:ACD4470  
Glyptotendipes nr. paripes[ZMUO.024763]Lauri Paasivirta[BOLD:ACD4470  
Glyptotendipes pallens[ZMUO.024984]Lauri Paasivirta[BOLD:ACD4470  
Glyptotendipes pallens[NHRS-BYWS00000527]Yngve Brodin[morphology]BOLD:ACD4470  
Glyptotendipes pallens[ZMUO.024747]Lauri Paasivirta[BOLD:ACD4470  
Glyptotendipes pallens[ZMUO.024983]Lauri Paasivirta[BOLD:ACD4470  
Glyptotendipes pallens[ZMUO.024746]Lauri Paasivirta[BOLD:ACD4470  
Dicrotendipes lobisier[Finnmark442]Torbjorn Ekrem[BOLD:AAV6004

[Glyptotendipes pallens](#)[ZMUO.024983|Lauri Paasivirta|BOLD:ACD4470  
[Glyptotendipes pallens](#)[ZMUO.024746|Lauri Paasivirta|BOLD:ACD4470  
[Dicrotendipes lobiger](#)[Finmark442|Torbjorn Ekrem|BOLD:AAM6004  
[Dicrotendipes lobiger](#)[Finmark136|Torbjorn Ekrem|BOLD:AAM6004  
[Dicrotendipes lobiger](#)[DIC\_LOB\_IM\_SSL205V\_25|Piotr Gadawski|Morphology|BOLD:AAW4705  
[Dicrotendipes lobiger](#)[DIC\_LOB\_IM\_PL7VII4\_161|Piotr Gadawski|Morphology|BOLD:AAW4705  
[Dicrotendipes lobiger](#)[ZMUO.024823|Lauri Paasivirta|BOLD:AAW4705  
[Dicrotendipes lobiger](#)[EJV-20110229|Lauri Paasivirta|BOLD:AAW4705  
[Dicrotendipes lobiger](#)[EJV-20110228|Lauri Paasivirta|BOLD:AAW4705  
[Dicrotendipes lobiger](#)[EJV-20110227|Lauri Paasivirta|BOLD:AAW4705  
[Dicrotendipes lobiger](#)[RIN\_CH84|Mona Renate Saurasunet|BOLD Identification engine|BOLD:AAW4705  
[Dicrotendipes lobiger](#)[BIOUG55153-D03|Renee Miskie|BIN Taxonomy Match (Jan 2021)|BOLD:AAW...  
[Dicrotendipes lobiger](#)[ZMUO.024824|Lauri Paasivirta|BOLD:AAW4705  
[Dicrotendipes lobiger](#)[ZSM-DIP-33133-A03|Caroline Chimento|BIN Taxonomy Match (Jan 2022)|BOLD...  
[Dicrotendipes lobiger](#)[TRD-CH25|Elisabeth Stur|BOLD:AAW4705  
[Dicrotendipes lobiger](#)[TRD-CH26|Elisabeth Stur|BOLD:AAW4705  
[Dicrotendipes lobiger](#)[RIN\_CH28|Mona Renate Saurasunet|BOLD Identification engine|BOLD:AAW4705  
[Dicrotendipes lobiger](#)[TRD-CH27|Elisabeth Stur|BOLD:AAW4705  
[Dicrotendipes lobiger](#)[RIN\_CH89|Mona Renate Saurasunet|BOLD Identification engine|BOLD:AAW4705  
[Dicrotendipes lobiger](#)[RIN\_CH85|Mona Renate Saurasunet|BOLD Identification engine|BOLD:AAW4705  
[Glyptotendipes aequalis](#)[ZMUO.024751|Lauri Paasivirta|BOLD:ADA6897  
[Glyptotendipes aequalis](#)[ZMUO.024750|Lauri Paasivirta|BOLD:ADA6897  
[Demicyptochironomus vulneratus](#)[ZMUO.025107|Lauri Paasivirta|BOLD:ADA8775  
[Demicyptochironomus vulneratus](#)[ZMUO.025106|Lauri Paasivirta|BOLD:ADA8775  
[Demicyptochironomus vulneratus](#)[NHRS-BYWS00000115|Yngve Brodin|morphology|BOLD:ADA8775  
[Demicyptochironomus cf. evgenii](#)[Finmark730|Torbjorn Ekrem|BOLD:AAL1205  
[Demicyptochironomus cf. evgenii](#)[Finmark724|Torbjorn Ekrem|BOLD:AAL1205  
[Parachironomus siljanensis](#)[NHRS-BYWS00000956|Yngve Brodin|morphology|BOLD:AAP6556  
[Parachironomus siljanensis](#)[Finmark222|Torbjorn Ekrem|BOLD:AAP6556  
[Parachironomus siljanensis](#)[Finmark261|Torbjorn Ekrem|BOLD:AAP6556  
[Parachironomus varus](#)[EJV-20110125|Lauri Paasivirta|BOLD:AAP6556  
[Parachironomus siljanensis](#)[Finmark221|Torbjorn Ekrem|BOLD:AAP6556  
[Parachironomus siljanensis](#)[NHRS-BYWS000001812|Torbjorn Ekrem|BOLD:AAP6556  
[Parachironomus siljanensis](#)[NHRS-BYWS00000955|Yngve Brodin|morphology|BOLD:AAP6556  
[Parachironomus gracilior](#)[ZSM-DIP-33129-A11|Caroline Chimento|BIN Taxonomy Match (Jan 2022)|B...  
[Parachironomus gracilior](#)[NHRS-BYWS000001174|Yngve Brodin|morphology|BOLD:AAAX2700  
[Parachironomus gracilior](#)[ZSM-DIP-33129-A03|Caroline Chimento|BIN Taxonomy Match (Jan 2022)|B...  
[Parachironomus gracilior](#)[NHRS-BYWS00000576|Yngve Brodin|morphology|BOLD:AAAX2700  
[Parachironomus](#)[BIOUG36677-G10|Kate Perez|BIN Taxonomy Match (May 2018)|BOLD:AAAX2700  
[Parachironomus gracilior](#)[ZSM-DIP-33129-A10|Caroline Chimento|BIN Taxonomy Match (Jan 2022)|B...  
[Parachironomus gracilior](#)[ZMUO.024743|Lauri Paasivirta|BOLD:AAAX2700  
[Parachironomus gracilior](#)[ZMUO.024742|Lauri Paasivirta|BOLD:AAAX2700  
[Parachironomus gracilior](#)[ZSM-DIP-33139-F09|Caroline Chimento|BIN Taxonomy Match (Jan 2022)|B...  
[Parachironomus gracilior](#)[NHRS-BYWS00000105|Yngve Brodin|morphology|BOLD:AAAX2700  
[Parachironomus gracilior](#)[BIOUG14950-A11|Kate Perez|BIN Taxonomy Match|BOLD:AAAX2700  
[Parachironomus gracilior](#)[NHRS-BYWS000001043|Yngve Brodin|morphology|BOLD:AAAX2700  
[Parachironomus gracilior](#)[NHRS-BYWS00000209|Yngve Brodin|morphology|BOLD:AAAX2700  
[Parachironomus gracilior](#)[NHRS-BYWS00000210|Yngve Brodin|morphology|BOLD:AAAX2700  
[Parachironomus gracilior](#)[NHRS-BYWS00000103|Yngve Brodin|morphology|BOLD:AAAX2700  
[Parachironomus gracilior](#)[EJV-20110246|Lauri Paasivirta|BOLD:AAAX2700  
[Parachironomus biannulatus](#)[ZMUO.025185|Lauri Paasivirta|BOLD:ADA8425  
[Parachironomus biannulatus](#)[ZMUO.025184|Lauri Paasivirta|BOLD:ADA8425  
[Parachironomus varus](#)[PP0266|Lauri Paasivirta|BOLD:ADZ0189  
[Parachironomus paradigitalis](#)[ZMUO.024885|Lauri Paasivirta|BOLD:ADA6315  
[Parachironomus paradigitalis](#)[ZMUO.024884|Lauri Paasivirta|BOLD:ADA6315  
[Parachironomus parilis](#)[ZMUO.025093|Lauri Paasivirta|BOLD:ADA8129  
[Parachironomus parilis](#)[NHRS-BYWS00000531|Yngve Brodin|morphology|BOLD:AAW4848  
[Parachironomus parilis](#)[RIN\_CH59|Mona Renate Saurasunet|BOLD Identification engine|BOLD:AAW4848  
[Parachironomus parilis](#)[ZMUO.025092|Lauri Paasivirta|BOLD:AAW4848  
[Parachironomus parilis](#)[RIN\_CH87|Mona Renate Saurasunet|BOLD Identification engine|BOLD:AAW4848  
[Parachironomus parilis](#)[BIOUG14950-G07|Kate Perez|BIN Taxonomy Match|BOLD:AAW4848  
[Parachironomus parilis](#)[TRD-CH226|Elisabeth Stur|BOLD:AAW4848  
[Parachironomus parilis](#)[EJV-20110235|Lauri Paasivirta|BOLD:AAW4848  
[Parachironomus parilis](#)[EJV-20110234|Lauri Paasivirta|BOLD:AAW4848  
[Parachironomus parilis](#)[EJV-20110233|Lauri Paasivirta|BOLD:AAW4848  
[Parachironomus parilis](#)[EJV-20110233|Lauri Paasivirta|BOLD:AAW4848  
[Paracladopelma campolabis](#)[BIOUG06062-D01|Kate Perez|BIN Taxonomy Match|BOLD:ACG6668  
[Paracladopelma undine](#)[Finmark185|Torbjorn Ekrem|BOLD:AAAP6209  
[Paracladopelma undine](#)[BIOUG16198-F03|Kate Perez|BIN Taxonomy Match|BOLD:AAAP6209  
[Cryptochironomus obrepans](#)[ZMUO.026144|Lauri Paasivirta|BOLD:ADE9664  
[Cryptochironomus albofasciatus](#)[ZMUO.025213|Lauri Paasivirta|BOLD:ADE9664  
[Cryptochironomus albofasciatus](#)[NHRS-BYWS000001066|Yngve Brodin|morphology|BOLD:ADE9664  
[Cryptochironomus albofasciatus](#)[NHRS-BYWS000000495|Yngve Brodin|morphology|BOLD:ADK3172  
[Cryptochironomus albofasciatus](#)[ZMUO.025212|Lauri Paasivirta|BOLD:ADF0941  
[Cryptochironomus obrepans](#)[ZMUO.026145|Lauri Paasivirta|BOLD:ADF0940  
[Cryptochironomus supplicans](#)[ZMUO.025357|Lauri Paasivirta|BOLD:ADF0940  
[Cryptochironomus supplicans](#)[ZMUO.025356|Lauri Paasivirta|BOLD:ADF0940  
[Cryptochironomus supplicans](#)[NHRS-BYWS00000494|Yngve Brodin|morphology|BOLD:ADF0940  
[Cryptochironomus supplicans](#)[NHRS-BYWS00000487|Yngve Brodin|morphology|BOLD:ADF0940  
[Cryptochironomus supplicans](#)[NHRS-BYWS00000348|Yngve Brodin|morphology|BOLD:ADF0940  
[Cryptochironomus supplicans](#)[NHRS-BYWS00000283|Yngve Brodin|morphology|BOLD:ADF0940  
[Cryptochironomus supplicans](#)[NHRS-BYWS00000399|Yngve Brodin|morphology|BOLD:AAW4936  
[Cryptochironomus supplicans](#)[EJV-20110071|Lauri Paasivirta|BOLD:AAW4936  
[Cryptochironomus obrepans](#)[KY225346|BOLD:AAW4936  
[Cryptochironomus supplicans](#)[NHRS-BYWS00000250|Yngve Brodin|morphology|BOLD:AAW4936  
[Cryptochironomus supplicans](#)[NHRS-BYWS00000102|Yngve Brodin|morphology|BOLD:AAW4936  
[Cryptochironomus supplicans](#)[EJV-20110068|Lauri Paasivirta|BOLD:AAW4936  
[Cryptochironomus supplicans](#)[EJV-20110069|Lauri Paasivirta|BOLD:AAW4936  
[Demicyptochironomus vulneratus](#)[PP0273|Lauri Paasivirta|BOLD:ACQ8800  
[Chironominae](#)[BIOUG16476-E06|Kate Perez|BOLD ID Engine Manual|BOLD:ACQ8800  
[Chironominae](#)[BIOUG16433-G07|Kate Perez|BOLD ID Engine Manual|BOLD:ACQ8800  
[Demicyptochironomus vulneratus](#)[BIOUG16430-A01|Elisabeth Stur|BOLD ID |BOLD:ACQ8800  
[Chironominae](#)[BIOUG16551-E02|Kate Perez|BOLD ID Engine Manual|BOLD:ACQ8800  
[Glyptotendipes signatus](#)[NHRS-BYWS00000975|Yngve Brodin|morphology|BOLD:ADA3607  
[Glyptotendipes signatus](#)[ZMUO.025252|Lauri Paasivirta|BOLD:ADA3607  
[Glyptotendipes signatus](#)[ZMUO.025251|Lauri Paasivirta|BOLD:ADA3607  
[Dicrotendipes](#)[CCDB22603-B02|Sofia Wiedenbrug|BOLD:ACQ7103  
[Dicrotendipes pulsus](#)[CCDB21606-B02|Sofia Wiedenbrug|BOLD:ACT5783  
[Dicrotendipes pulsus](#)[CCDB21606-B04|Sofia Wiedenbrug|BOLD:ACT5783  
[Dicrotendipes pulsus](#)[NHRS-BYWS000001822|Yngve Brodin|BOLD:ABZ6609  
[Dicrotendipes modestus](#)[CH-OSF149|Elisabeth Stur|BOLD:ABZ6609  
[Dicrotendipes pulsus](#)[NHRS-BYWS00000362|Yngve Brodin|morphology|BOLD:AAM6003  
[Dicrotendipes pulsus](#)[NHRS-BYWS00000347|Yngve Brodin|morphology|BOLD:AAM6003

*Dicrotendipes modestus*[FIN-057149]Elisabeth Stur|BOLD:ADZ0009  
*Dicrotendipes pulsus*[NHRS-BYWS00000362]Yngve Brodin|morphology|BOLD:AAM6003  
*Dicrotendipes pulsus*[NHRS-BYWS00000347]Yngve Brodin|morphology|BOLD:AAM6003  
*Dicrotendipes pulsus*[NHRS-BYWS000001027]Yngve Brodin|morphology|BOLD:AAM6003  
*Dicrotendipes pulsus*[ZMUO.024847]Lauri Paasivirta|BOLD:AAM6003  
*Dicrotendipes modestus*[Finmark667]Elisabeth Stur|BOLD:AAM6003  
*Dicrotendipes modestus*[Finmark131]Elisabeth Stur|BOLD:AAM6003  
*Dicrotendipes pulsus*[NHRS-BYWS00000498]Yngve Brodin|morphology|BOLD:AAM6003  
*Dicrotendipes modestus*[Finmark351]Elisabeth Stur|BOLD:AAM6003  
*Dicrotendipes pulsus*[NHRS-BYWS00000346]Yngve Brodin|morphology|BOLD:AAM6003  
*Dicrotendipes pulsus*[NHRS-BYWS000001092]Yngve Brodin|morphology|BOLD:AAM6003  
*Dicrotendipes pulsus*[ZMUO.024848]Lauri Paasivirta|BOLD:AAM6003  
*Dicrotendipes modestus*[Finmark454]Elisabeth Stur|BOLD:AAM6003  
*Dicrotendipes* sp. 2TE|Finmark443|Elisabeth Stur  
*Dicrotendipes* sp. 2TE|TRD-CH38|Elisabeth Stur|morphology|BOLD:AAN5385  
*Dicrotendipes nervosus*[ZMUO.024871]Lauri Paasivirta|BOLD:AAN5385  
*Dicrotendipes nervosus*[ZMUO.024870]Lauri Paasivirta|BOLD:AAN5385  
*Dicrotendipes* sp. 2TE|RIN-CH63|Elisabeth Stur|morphology|BOLD:AAN5385  
*Cryptochironomus psittacinus*[ZMUO.026198]Lauri Paasivirta|BOLD:ADF1906  
*Cryptochironomus psittacinus*[KY225344]||BOLD:ADK3655  
*Cryptochironomus psittacinus*[KY225343]||BOLD:ADK3655  
*Cryptochironomus redekei*[NHRS-BYWS00000359]Yngve Brodin|morphology|BOLD:ADF2197  
*Cryptochironomus redekei*[NHRS-BYWS00000282]Yngve Brodin|morphology|BOLD:ADF2197  
*Cryptochironomus redekei*[ZMUO.026185]Lauri Paasivirta|BOLD:ADF2197  
*Cryptochironomus redekei*[ZMUO.026186]Lauri Paasivirta|BOLD:ADF2197  
*Cryptochironomus redekei*[NHRS-BYWS00000497]Yngve Brodin|morphology|BOLD:ADF2197  
*Cryptochironomus redekei*[NHRS-BYWS00000395]Yngve Brodin|morphology|BOLD:ADF2197  
*Cryptochironomus rostratus*[BIOUG16433-G05]Kate Perez|BIN Taxonomy Match (Aug 2017)|BOLD:...  
*Cryptochironomus rostratus*[ZMUO.025373]Lauri Paasivirta|BOLD:ACQ9452  
*Cryptochironomus rostratus*[ZMUO.025372]Lauri Paasivirta|BOLD:ACQ9452  
*Cryptochironomus* NHRS sp. A|[NHRS-BYWS00000400]Yngve Brodin|morphology|BOLD:ACQ9452  
*Cryptochironomus* NHRS sp. A|[NHRS-BYWS00000908]Yngve Brodin|morphology|BOLD:ACQ9452  
*Cryptochironomus* NHRS sp. A|[NHRS-BYWS00000909]Yngve Brodin|morphology|BOLD:ACQ9452  
*Cryptochironomus rostratus*[BIOUG16296-F09]Kate Perez|BIN Taxonomy Match (Aug 2017)|BOLD:...  
*Cladopelma virescens*[NHRS-BYWS00000109]Yngve Brodin|morphology|BOLD:AAV8096  
*Cladopelma virescens*[ZMUO.025242]Lauri Paasivirta|BOLD:AAV8096  
*Cladopelma virescens*[ZMUO.025241]Lauri Paasivirta|BOLD:AAV8096  
*Cladopelma virescens*[NHRS-BYWS00000930]Yngve Brodin|morphology|BOLD:AAV8096  
*Cladopelma virescens*[NHRS-BYWS00000256]Yngve Brodin|morphology|BOLD:AAV8096  
*Cladopelma virescens*[NHRS-BYWS00000231]Yngve Brodin|morphology|BOLD:AAV8096  
*Cladopelma virescens*[NHRS-BYWS00000108]Yngve Brodin|morphology|BOLD:AAV8096  
*Cladopelma virescens*[NHRS-BYWS00000107]Yngve Brodin|morphology|BOLD:AAV8096  
*Cladopelma virescens*[NHRS-BYWS000001831]Yngve Brodin|BOLD:AAV8096  
*Cladopelma virescens*[NHRS-BYWS000001830]Yngve Brodin|BOLD:AAV8096  
*Cladopelma edwardsi*[ZMUO.025286]Lauri Paasivirta|BOLD:ADA3687  
*Cladopelma edwardsi*[ZMUO.025285]Lauri Paasivirta|BOLD:ADA3687  
*Cladopelma bicarinatum*[ZMUO.024863]Lauri Paasivirta|BOLD:ADA6739  
*Cladopelma bicarinatum*[ZMUO.024862]Lauri Paasivirta|BOLD:ADA6739  
*Cladopelma viridulum*[NHRS-BYWS000001127]Yngve Brodin|morphology|BOLD:AAV3586  
*Cladopelma viridulum*[ZMUO.024865]Lauri Paasivirta|BOLD:AAV3586  
*Cladopelma viridulum*[NHRS-BYWS00000417]Yngve Brodin|morphology|BOLD:AAV3586  
*Cladopelma viridulum*[ZMUO.024864]Lauri Paasivirta|BOLD:AAV3586  
*Cladopelma viridulum*[NHRS-BYWS00000932]Yngve Brodin|morphology|BOLD:AAV3586  
*Cladopelma viridulum*[NHRS-BYWS00000450]Yngve Brodin|morphology|BOLD:AAV3586  
*Cladopelma viridulum*[NHRS-BYWS00000418]Yngve Brodin|morphology|BOLD:AAV3586  
*Cladopelma viridulum*[NHRS-BYWS00000958]Yngve Brodin|morphology|BOLD:AAV3586  
*Cladopelma viridulum*[NHRS-BYWS00000480]Yngve Brodin|morphology|BOLD:AAV3586  
*Cladopelma viridulum*[NHRS-BYWS00000479]Yngve Brodin|morphology|BOLD:AAV3586  
*Cladopelma viridulum*[Finmark669]Elisabeth Stur|BOLD:AAV3586  
*Cladopelma viridulum*[Finmark590]Elisabeth Stur|BOLD:AAD7363  
*Paracladopelma cf. augustus*[Finmark498]Torbjorn Ekrem|BOLD:AAV3580  
*Parachironomus vitiosus*[ZMUO.025109]Lauri Paasivirta|BOLD:ADA6129  
*Robackia demejerei*[NHRS-BYWS000001069]Yngve Brodin|morphology|BOLD:ADA6129  
*Parachironomus vitiosus*[ZMUO.025342]Lauri Paasivirta|BOLD:ADA6129  
*Parachironomus vitiosus*[ZMUO.025341]Lauri Paasivirta|BOLD:ADA6129  
*Parachironomus vitiosus*[ZMUO.025108]Lauri Paasivirta|BOLD:ADA6129  
*Dicrotendipes tritonus*[BIOUG36766-D04]Kate Perez|BIN Taxonomy Match (Jul 2018)|BOLD:ACY6508  
*Dicrotendipes tritonus*[ZMUO.025142]Lauri Paasivirta|BOLD:ACY6508  
*Dicrotendipes tritonus*[ZMUO.025141]Lauri Paasivirta|BOLD:ACY6508  
*Paracladopelma laminatum*[ZMUO.025161]Lauri Paasivirta|BOLD:ADA7467  
*Paracladopelma laminatum*[ZMUO.025160]Lauri Paasivirta|BOLD:ADA7467  
*Paracladopelma laminatum*[NHRS-BYWS00000916]Yngve Brodin|morphology|BOLD:ADA7467  
*Paracladopelma laminatum*[NHRS-BYWS00000915]Yngve Brodin|morphology|BOLD:ADA7467  
*Paracladopelma laminatum*[NHRS-BYWS000001074]Yngve Brodin|morphology|BOLD:ADA7467  
*Paracladopelma laminatum*[NHRS-BYWS000001143]Yngve Brodin|morphology|BOLD:ADA7467  
*Chironomus pallidivittatus*[EJV-20110226]Lauri Paasivirta|BOLD:AAE9024  
*Chironomus pallidivittatus*[ZMUO.025236]Lauri Paasivirta|BOLD:AAE9024  
*Chironomus pallidivittatus*[ZMUO.025235]Lauri Paasivirta|BOLD:AAE9024  
*Chironomus pallidivittatus*[NHRS-BYWS00000371]Yngve Brodin|morphology|BOLD:AAE9024  
*Chironomus pallidivittatus*[NHRS-BYWS00000214]Yngve Brodin|morphology|BOLD:AAE9024  
*Chironomus pallidivittatus*[NHRS-BYWS00000204]Yngve Brodin|morphology|BOLD:AAE9024  
*Chironomus pallidivittatus*[NHRS-BYWS000001177]Yngve Brodin|morphology|BOLD:AAE9024  
*Chironomus tentans*[ZMUO.025168]Lauri Paasivirta|BOLD:AAE9024  
*Chironomus pallidivittatus*[NHRS-BYWS00000280]Yngve Brodin|morphology|BOLD:AAE9024  
*Chironomus tentans*[ZMUO.026193]Lauri Paasivirta|BOLD:AAE9024  
*Chironomus pallidivittatus*[EJV-20110224]Lauri Paasivirta|BOLD:AAE9024  
*Chironomus tentans*[ZMUO.025169]Lauri Paasivirta|BOLD:AAE9024  
*Chironomus pallidivittatus*[NHRS-BYWS000001817]Yngve Brodin|BOLD:AAE9024  
*Chironomus pallidivittatus*[NHRS-BYWS000001816]Yngve Brodin|BOLD:AAE9024  
*Chironomus pallidivittatus*[NHRS-BYWS000001138]Yngve Brodin|morphology|BOLD:AAE9024  
*Chironomus pallidivittatus*[NHRS-BYWS00000968]Yngve Brodin|morphology|BOLD:AAE9024  
*Chironomus pallidivittatus*[NHRS-BYWS00000934]Yngve Brodin|morphology|BOLD:AAE9024  
*Chironomus tentans*[ZMUO.026194]Lauri Paasivirta|BOLD:AAE9024  
*Chironomus pallidivittatus*[NHRS-BYWS00000198]Yngve Brodin|morphology|BOLD:AAE9024  
*Chironomus tentans*[Finmark657]Torbjorn Ekrem|BOLD:AAE9024  
*Chironomus tentans*[TRD-CH315]Elisabeth Stur|BOLD:AAE9024  
*Chironomus tentans*[TRD-CH214]Elisabeth Stur|BOLD:AAE9024  
*Chironomus tentans*[TRD-CH213]Elisabeth Stur|BOLD:AAE9024  
*Parachironomus frequens*[ZMUO.025260]Lauri Paasivirta|BOLD:AAZ2675  
*Parachironomus frequens*[ZMUO.025259]Lauri Paasivirta|BOLD:AAZ2675  
*Parachironomus frequens*[NHRS-BYWS000001041]Yngve Brodin|morphology|BOLD:AAZ2675  
*Parachironomus frequens*[EJV-20110220]Lauri Paasivirta|BOLD:AAZ2675  
*Parachironomus frequens*[NHRS-BYWS00000941]Yngve Brodin|morphology|BOLD:AAZ2675

Parachironomus frequens|NHRS-BYWS000001041|Yngve Brodin|morphology|BOLD:AAx2675  
 Parachironomus frequens|EJV-20110220|Lauri Paasivirta|BOLD:AAx2675  
 Parachironomus frequens|NHRS-BYWS000000941|Yngve Brodin|morphology|BOLD:AAx2675  
 Parachironomus frequens|ZSM-DIP-33139-F07|Caroline Chimeno|BIN Taxonomy Match (Jan 2022)|BOL...  
 Parachironomus frequens|NHRS-BYWS000001040|Yngve Brodin|morphology|BOLD:AAx2675  
 Cricotopus plicicauda|ZMUO.026157|Lauri Paasivirta|BOLD:ACR2474  
 Paracladopelma|BIOUG17224-F05|Valerie Levesque-Beaudin|Digital Morphology|BOLD:ACR2474  
 Cryptotendipes pflugfelderii|ZMUO.026234|Lauri Paasivirta|BOLD:ADF1721  
 Harnischia curtilamellata|ZMUO.024934|Lauri Paasivirta|BOLD:AAy2074  
 Harnischia curtilamellata|ZSM-DIP-33149-B08|Caroline Chimeno|BIN Taxonomy Match (Jan 2022)|...  
 Harnischia curtilamellata|ZMUO.024933|Lauri Paasivirta|BOLD:AAy2074  
 Harnischia curtilamellata|ZSM-DIP-33133-A04|Caroline Chimeno|BIN Taxonomy Match (Jan 2022)|...  
 Harnischia curtilamellata|ZSM-DIP-33133-A05|Caroline Chimeno|BIN Taxonomy Match (Jan 2022)|...  
 Harnischia curtilamellata|ZSM-DIP-33135-A04|Caroline Chimeno|BIN Taxonomy Match (Jan 2022)|...  
 Harnischia curtilamellata|ZSM-DIP-33133-G01|Caroline Chimeno|BIN Taxonomy Match (Jan 2022)|...  
 Harnischia curtilamellata|EJV-20110217|Lauri Paasivirta|BOLD:AAy2074  
 Microchironomus tener|NHRS-BYWS000000929|Yngve Brodin|morphology|BOLD:AAx4146  
 Microchironomus tener|ZMUO.025225|Lauri Paasivirta|BOLD:AAx4146  
 Microchironomus tener|ZMUO.025224|Lauri Paasivirta|BOLD:AAx4146  
 Microchironomus tener|NHRS-BYWS000000191|Yngve Brodin|morphology|BOLD:AAx4146  
 Microchironomus tener|NHRS-BYWS000000207|Yngve Brodin|morphology|BOLD:AAx4146  
 Microchironomus tener|NHRS-BYWS000000106|Yngve Brodin|morphology|BOLD:AAx4146  
 Microchironomus tener|NHRS-BYWS000000255|Yngve Brodin|morphology|BOLD:AAx4146  
 Microchironomus tener|NHRS-BYWS000000104|Yngve Brodin|morphology|BOLD:AAx4146  
 Microchironomus tener|NHRS-BYWS000000224|Yngve Brodin|morphology|BOLD:AAx4146  
 Microchironomus tener|NHRS-BYWS000001847|Yngve Brodin|BOLD:AAx4146  
 Paracladopelma|CCDB22605E03|Sofia Wiedenbrug|BOLD:ACT9115  
 Paracladopelma|ZSM-DIP-33129-F04|Caroline Chimeno|BIN Taxonomy Match (Jan 2022)|BOLD:ACT...  
 Paracladopelma|ZSM-DIP-33149-G12|Caroline Chimeno|BIN Taxonomy Match (Jan 2022)|BOLD:ACT...  
 Paracladopelma|ZSM-DIP-33147-D08|Caroline Chimeno|BIN Taxonomy Match (Jan 2022)|BOLD:ACT...  
 Paracladopelma|ZSM-DIP-33137-G02|Caroline Chimeno|BIN Taxonomy Match (Jan 2022)|BOLD:ACT...  
 Paracladopelma|ZSM-DIP-33144-E06|Caroline Chimeno|BIN Taxonomy Match (Jan 2022)|BOLD:ACT...  
 Paracladopelma|ZSM-DIP-33146-E04|Caroline Chimeno|BIN Taxonomy Match (Jan 2022)|BOLD:ACT...  
 Paracladopelma|ZSM-DIP-33147-C04|Caroline Chimeno|BIN Taxonomy Match (Jan 2022)|BOLD:ACT...  
 Paracladopelma|ZSM-DIP-33147-D11|Caroline Chimeno|BIN Taxonomy Match (Jan 2022)|BOLD:ACT...  
 Paracladopelma|CCDB22605-E02|Sofia Wiedenbrug|BOLD:ACT9115  
 Paracladopelma|BIOUG55103-F04|Stefan Schmidt|BIN Taxonomy Match (Sep 2020)|BOLD:ACT9115  
 Paracladopelma|BIOUG42719-C09|Kate Perez|BIN Taxonomy Match below Phylum (Jun 2019)|BOLD ...  
 Paracladopelma|BIOUG55197-G04|Stefan Schmidt|BIN Taxonomy Match (Sep 2020)|BOLD:ACT9115  
 Dicrotendipes notatus|ZMUO.025240|Lauri Paasivirta|BOLD:ADA4878  
 Dicrotendipes notatus|ZMUO.025239|Lauri Paasivirta|BOLD:ADA4878  
 Dicrotendipes pulsus|DIC\_PUL\_IM\_SSL205V\_37|Piotr Gadawski|Morphology|BOLD:ADA4878  
 Dicrotendipes pulsus|DIC\_LOB\_IM\_PL7V14\_122|Piotr Gadawski|Morphology|BOLD:ADA4878  
 Dicrotendipes pulsus|DIC\_PUL\_IM\_PL7V14\_116|Piotr Gadawski|Morphology|BOLD:ADA4878  
 Dicrotendipes|IM\_SKD2\_30|Piotr Gadawski|Morphology|BOLD:ADA4878  
 Dicrotendipes pulsus|BIOUG52512-E09|Kate Perez|BIN Taxonomy Match (Mar 2020)|BOLD:ADA4878  
 Parachironomus subalpinus|TRD-CH157|Elisabeth Stur|morphology|BOLD:AAP6557  
 Parachironomus subalpinus|Finmark225|Torbjorn Ekrem|BOLD:AAP6557  
 Parachironomus subalpinus|Finmark224|Torbjorn Ekrem|BOLD:AAP6557  
 Parachironomus subalpinus|ZMUO.025159|Lauri Paasivirta|BOLD:AAP6557  
 Parachironomus tenuicaudatus|BIOUG36762-D08|Kate Perez|BIN Taxonomy Match (May 2018)|BOLD ...  
 Parachironomus tenuicaudatus|ZMUO.025379|Lauri Paasivirta|BOLD:ACE3297  
 Parachironomus tenuicaudatus|ZMUO.025378|Lauri Paasivirta|BOLD:ACE3297  
 Parachironomus tenuicaudatus|CH-eik19|Elisabeth Stur|BOLD:ACE3297  
 Chironomus transvaalensis|LA\_LSLRZ9\_227|Piotr Gadawski|Morphology|BOLD:AAW3995  
 Chironomus transvaalensis|LA\_LSLRZ9\_98|Piotr Gadawski|BOLD:AAW3995  
 Chironomus transvaalensis|LA\_LSLRZ9\_232|Piotr Gadawski|Morphology|BOLD:AAW3995  
 Chironomus transvaalensis|LA\_LSLRZ9\_224|Piotr Gadawski|Morphology|BOLD:AAW3995  
 Chironomus transvaalensis|LA\_LSLRZ9\_59|Piotr Gadawski|BOLD:AAW3995  
 Chironomus transvaalensis|LA\_LSLRZ9\_100|Piotr Gadawski|BOLD:AAW3995  
 Chironomus|ZSM-DIP-33128-C01|Caroline Chimeno|BIN Taxonomy Match (Jan 2022)|BOLD:ACO0599  
 Chironomus|ZSM-DIP-33145-B07|Caroline Chimeno|BIN Taxonomy Match (Jan 2022)|BOLD:ACO0599  
 Chironomus|ZSM-DIP-33147-F07|Caroline Chimeno|BIN Taxonomy Match (Jan 2022)|BOLD:ACO0599  
 Chironomus|ZSM-DIP-33140-H11|Caroline Chimeno|BIN Taxonomy Match (Jan 2022)|BOLD:ACO0599  
 Chironomus|ZSM-DIP-33144-C08|Caroline Chimeno|BIN Taxonomy Match (Jan 2022)|BOLD:ACO0599  
 Chironomus|ZSM-DIP-33144-G10|Caroline Chimeno|BIN Taxonomy Match (Jan 2022)|BOLD:ACO0599  
 Chironomus|ZSM-DIP-33129-F07|Caroline Chimeno|BIN Taxonomy Match (Jan 2022)|BOLD:ACO0599  
 Chironomus|ZSM-DIP-33139-A01|Caroline Chimeno|BIN Taxonomy Match (Jan 2022)|BOLD:ACO0599  
 Chironomus|ZSM-DIP-33138-B12|Caroline Chimeno|BIN Taxonomy Match (Jan 2022)|BOLD:ACO0599  
 Chironomus|ZSM-DIP-33138-B10|Caroline Chimeno|BIN Taxonomy Match (Jan 2022)|BOLD:ACO0599  
 Chironomus|ZSM-DIP-33137-G01|Caroline Chimeno|BIN Taxonomy Match (Jan 2022)|BOLD:ACO0599  
 Chironomus|ZSM-DIP-33135-A05|Caroline Chimeno|BIN Taxonomy Match (Jan 2022)|BOLD:ACO0599  
 Chironomus|ZSM-DIP-33142-G04|Caroline Chimeno|BIN Taxonomy Match (Jan 2022)|BOLD:ACO0599  
 Chironomus|ZSM-DIP-33133-F12|Caroline Chimeno|BIN Taxonomy Match (Jan 2022)  
 Cryptotendipes usmaensis|ZMUO.025254|Lauri Paasivirta|BOLD:ADA4237  
 Cryptotendipes usmaensis|ZMUO.025253|Lauri Paasivirta|BOLD:ADA4237  
 Cryptotendipes usmaensis|ZSM-DIP-33133-G07|Caroline Chimeno|BIN Taxonomy Match (Jan 2022)|B...  
 Cryptotendipes usmaensis|ZSM-DIP-33133-A08|Caroline Chimeno|BIN Taxonomy Match (Jan 2022)|B...  
 Cryptotendipes usmaensis|ZSM-DIP-33133-G06|Caroline Chimeno|BIN Taxonomy Match (Jan 2022)|B...  
 Chironomus|ZMUO.025350|Lauri Paasivirta|BOLD:ADF0267  
 Chironomus|ZMUO.025349|Lauri Paasivirta|BOLD:ADF0267  
 Glyptotendipes cauliginellus|ZMUO.024247|Lauri Paasivirta|BOLD:ACE3296  
 Glyptotendipes cauliginellus|CH-eik21|Elisabeth Stur|BOLD:ACE3296  
 Glyptotendipes cauliginellus|CH-eik20|Elisabeth Stur|BOLD:ACE3296  
 Glyptotendipes cauliginellus|CH-eik125|Elisabeth Stur|BOLD:ACE3296  
 Glyptotendipes cauliginellus|CH-eik53|Elisabeth Stur|BOLD:ACE3296  
 Glyptotendipes cauliginellus|CH-eik23|Elisabeth Stur|BOLD:ACE3296  
 Chironomus mendax|ZSM-DIP-33145-E05|Caroline Chimeno|BIN Taxonomy Match (Jan 2022)|BOLD:...  
 Chironomus mendax|BIOUG15951-F08|Kate Perez|BIN Taxonomy Match (Aug 2017)|BOLD:ACQ8317  
 Chironomus mendax|ZMUO.025125|Lauri Paasivirta|BOLD:ACQ8317  
 Chironomus mendax|ZMUO.025124|Lauri Paasivirta|BOLD:ACQ8317  
 Chironomus storai|ZMUO.026020|Lauri Paasivirta|BOLD:ACR8183  
 Chironomus storai|ZMUO.024868|Lauri Paasivirta|BOLD:ACR8183  
 Chironomus storai|Finmark662|Torbjorn Ekrem|BOLD:AAV3584  
 Chironomus storai|ZMUO.026021|Lauri Paasivirta|BOLD:AAV3584  
 Chironomus storai|Finmark453|Torbjorn Ekrem|BOLD:AAV3584  
 Chironomus|Ya6-06187La1\_11M|Henk Valenduik|BOLD:ACG9844  
 Chironomus macani|CH-eik126|Elisabeth Stur|BOLD:ACG9844  
 Chironomus macani|ZMUO.025395|Lauri Paasivirta|BOLD:ACG9844  
 Fleuria lacustris|GBOL00762|Martin Spies|morpho-taxonomy|BOLD:ACB2983  
 Fleuria lacustris|GBOL00003|Martin Spies|morpho-taxonomy|BOLD:ACB2983  
 Benthalia carbonaria|ZMUO.025322|Lauri Paasivirta|BOLD:AAW3454  
 Benthalia carbonaria|LA\_LSLRZ17\_42|Piotr Gadawski|BOLD:ADF1214

Fleureia lacustris|GBOL00003|Martin Spies|morpho-taxonomy|BOLD:ACB2983  
Benthalia carbonaria|ZMUO.025322|Lauri Paasivirta||BOLD:AAW3454  
Benthalia carbonaria|LA\_LSLRZ17\_42|Piotr Gadawski||BOLD:ADF1214  
Benthalia carbonaria|LA\_LSLD1\_204|Piotr Gadawski||BOLD:ADF1214  
Benthalia carbonaria|LA\_LSLD3\_283|Piotr Gadawski||BOLD:ADF1214  
Benthalia carbonaria|LA\_LSLD1\_259|Piotr Gadawski||BOLD:ADF1214  
Benthalia carbonaria|LA\_LSLZ14\_21|Piotr Gadawski||BOLD:ADF1214  
Benthalia carbonaria|LA\_LSLD1\_141|Piotr Gadawski||BOLD:ADF1214  
Benthalia carbonaria|LA\_LSLD1\_256|Piotr Gadawski||BOLD:ADF1214  
Benthalia carbonaria|ZMUO.025321|Lauri Paasivirta||BOLD:ADF1214  
Benthalia carbonaria|LA\_LSLD1\_257|Piotr Gadawski||BOLD:ADF1214  
Benthalia carbonaria|LA\_LSLZ14\_22|Piotr Gadawski||BOLD:ADF1214  
Benthalia carbonaria|LA\_LSLD1\_142|Piotr Gadawski||BOLD:ADF1214  
Benthalia carbonaria|LA\_LSLD1\_255|Piotr Gadawski||BOLD:ADF1214  
Benthalia carbonaria|BIOUG42676-E08|Kate Perez|BIN Taxonomy Match below Phylum (Jul 2019)|B...  
Benthalia dissidens|mes11|Henk Valenduuk||BOLD:ADF1214  
Chironomus salinarius|NO70|Elisabeth Stur  
Chironomus salinarius|NO72|Elisabeth Stur  
Chironomus salinarius|NHRS-BYWS000001783|Yngve Brodin||BOLD:AAW5317  
Chironomus salinarius|NHRS-BYWS000001146|Yngve Brodin|morphology|BOLD:AAW5317  
Chironomus salinarius|NHRS-BYWS000001782|Yngve Brodin||BOLD:AAW5317  
Chironomus|ZSM-DIP-33134-G06|Caroline Chimento|BIN Taxonomy Match (Jan 2022)|BOLD:ACG9999  
Chironomus|ZSM-DIP-33147-D10|Caroline Chimento|BIN Taxonomy Match (Jan 2022)|BOLD:ACG9999  
Chironomus|BIOUG42727-H03|Kate Perez|BIN Taxonomy Match below Phylum (Jun 2019)|BOLD:ACG...  
Chironomus|ZSM-DIP-33129-F05|Caroline Chimento|BIN Taxonomy Match (Jan 2022)|BOLD:ACG9999  
Chironomus|ZSM-DIP-33170-D03|Caroline Chimento|BIN Taxonomy Match (Jan 2022)|BOLD:ACG9999  
Chironomus|ZSM-DIP-33146-E03|Caroline Chimento|BIN Taxonomy Match (Jan 2022)|BOLD:ACG9999  
Chironomus|ZSM-DIP-33170-D01|Caroline Chimento|BIN Taxonomy Match (Jan 2022)|BOLD:ACG9999  
Chironomus dorsalis|ZMUO.025090|Lauri Paasivirta||BOLD:ACG9999  
Chironomus dorsalis|ZMUO.025091|Lauri Paasivirta||BOLD:ACG9999  
Chironomus pseudomendax|RIN\_CH86|Elisabeth Stur|morphology|BOLD:ACG9999  
Chironomus pseudomendax|CH-eik127|Elisabeth Stur||BOLD:ACG9999  
Chironomus|ZSM-DIP-33149-E03|Caroline Chimento|BIN Taxonomy Match (Jan 2022)|BOLD:ACG9999  
Chironomus|ZSM-DIP-33145-H05|Caroline Chimento|BIN Taxonomy Match (Jan 2022)|BOLD:ACG9999  
Chironomus|BIOUG42691-B03|Kate Perez|BIN Taxonomy Match below Phylum (Jun 2019)|BOLD:ACG...  
Chironomus storai|ZMUO.024869|Lauri Paasivirta||BOLD:ADA6298  
Chironomus cf. mendax|CH-OSF96|Torbjorn Ekrem||BOLD:AAW5147  
Chironomus cf. mendax|TRD-CH423|Elisabeth Stur|morphology|BOLD:AAW5147  
Chironomus cf. mendax|TRD-CH298|Elisabeth Stur||BOLD:AAW5147  
Chironomus cf. mendax|TRD-CH229|Elisabeth Stur||BOLD:AAW5147  
Chironomus sp. 7TE|CH-OSF48|Torbjorn Ekrem||BOLD:AAW0807  
Chironomus nr. pseudothummi|ZMUO.024913|Lauri Paasivirta||BOLD:AAW0807  
Chironomus nr. pseudothummi|ZMUO.024912|Lauri Paasivirta||BOLD:AAW0807  
Chironomus nr. piger|ZMUO.025234|Lauri Paasivirta||BOLD:AER6112  
Chironomus nr. pseudothummi|ZMUO.025190|Lauri Paasivirta||BOLD:AER6112  
Chironomus nr. pseudothummi|ZMUO.024540|Lauri Paasivirta||BOLD:AER6112  
Chironomus pseudothummi|LA\_LSLRZ9\_240|Piotr Gadawski|Morphology|BOLD:AER6112  
Chironomus pseudothummi|LA\_LSLRZ9\_237|Piotr Gadawski|Morphology|BOLD:AER6112  
Chironomus|ZSM-DIP-33141-D06|Caroline Chimento|BIN Taxonomy Match (Jan 2022)|BOLD:AAU4044  
Chironomus nr. pseudothummi|ZMUO.024814|Lauri Paasivirta||BOLD:AAU4044  
Chironomus nr. pseudothummi|ZMUO.025191|Lauri Paasivirta||BOLD:AAU4044  
Chironomus pseudothummi|NHRS-BYWS000000991|Yngve Brodin|morphology|BOLD:AAU4044  
Chironomus|ZMUO.026116|Lauri Paasivirta||BOLD:AAU4044  
Chironomus pseudothummi-agg.2|EJV-20110240|Lauri Paasivirta||BOLD:AAU4044  
Chironomus pseudothummi|NHRS-BYWS000000409|Yngve Brodin|morphology|BOLD:AAU4044  
Chironomus pseudothummi|NHRS-BYWS000000314|Yngve Brodin|morphology|BOLD:AAU4044  
Chironomus pseudothummi-agg.1|EJV-20110003|Lauri Paasivirta||BOLD:AAU4044  
Chironomus pseudothummi-agg.1|EJV-20110002|Lauri Paasivirta||BOLD:AAU4044  
Chironomus pseudothummi|NHRS-BYWS000000931|Yngve Brodin|morphology|BOLD:AAU4044  
Chironomus pseudothummi|NHRS-BYWS000000545|Yngve Brodin|morphology|BOLD:AAU4044  
Chironomus pseudothummi|NHRS-BYWS000000981|Yngve Brodin|morphology|BOLD:AAU4044  
Chironomus pseudothummi|NHRS-BYWS000000970|Yngve Brodin|morphology|BOLD:AAU4044  
Chironomus pseudothummi|NHRS-BYWS000000313|Yngve Brodin|morphology|BOLD:AAU4044  
Chironomus pseudothummi|NHRS-BYWS000000982|Yngve Brodin|morphology|BOLD:AAU4044  
Chironomus pseudothummi-agg.2|EJV-20110239|Lauri Paasivirta||BOLD:AAU4044  
Chironomus pseudothummi-agg.2|EJV-20110243|Lauri Paasivirta||BOLD:AAU4044  
Chironomus pseudothummi|NHRS-BYWS000001062|Yngve Brodin|morphology|BOLD:AAU4044  
Chironomus|ZMUO.026117|Lauri Paasivirta||BOLD:AAU4044  
Chironomus pseudothummi|NHRS-BYWS000001142|Yngve Brodin|morphology|BOLD:AAU4044  
Chironomus pseudothummi|NHRS-BYWS000001860|Yngve Brodin||BOLD:AAU4044  
Chironomus pseudothummi|NHRS-BYWS000001865|Yngve Brodin||BOLD:AAU4044  
Chironomus pseudothummi-agg.1|EJV-20110009|Lauri Paasivirta||BOLD:AAU4044  
Chironomus pseudothummi-agg.1|EJV-20110007|Lauri Paasivirta||BOLD:AAU4044  
Chironomus pseudothummi-agg.1|EJV-20110010|Lauri Paasivirta||BOLD:AAU4044  
Chironomus pseudothummi-agg.2|EJV-20110242|Lauri Paasivirta||BOLD:AAU4044  
Chironomus pseudothummi|NHRS-BYWS000001033|Yngve Brodin|morphology|BOLD:AAU4044  
Chironomus pseudothummi-agg.2|EJV-20110241|Lauri Paasivirta||BOLD:AAU4044  
Chironomus pseudothummi-agg.1|EJV-20110008|Lauri Paasivirta||BOLD:AAU4044  
Chironomus pseudothummi-agg.1|EJV-20110005|Lauri Paasivirta||BOLD:AAU4044  
Chironomus pseudothummi-agg.1|EJV-20110004|Lauri Paasivirta||BOLD:AAU4044  
Chironomus pseudothummi-agg.1|EJV-20110001|Lauri Paasivirta||BOLD:AAU4044  
Chironomus riparius|LN894552||BOLD:AAA7263  
Chironomus riparius|LN894371||BOLD:AAA7263  
Chironomus riparius|LN894358||BOLD:AAA7263  
Chironomus riparius|LN894359||BOLD:AAA7263  
Chironomus riparius|LN894369||BOLD:AAA7263  
Chironomus riparius|LN894289||BOLD:AAA7263  
Chironomus nr. sollicitus|ZMUO.025402|Lauri Paasivirta||BOLD:AAA7263  
Chironomus nr. sollicitus|ZMUO.024543|Lauri Paasivirta||BOLD:AAA7263  
Chironomus riparius|LN894215||BOLD:AAA7263  
Chironomus riparius|LN894503||BOLD:AAA7263  
Chironomus riparius|ZSM-DIP-33144-G11|Caroline Chimento|BIN Taxonomy Match (Jan 2022)|BOLD ...  
Chironomus riparius|LN894313||BOLD:AAA7263  
Chironomus riparius|LN894316||BOLD:AAA7263  
Chironomus riparius|LN894300||BOLD:AAA7263  
Chironomus riparius|LN894220||BOLD:AAA7263  
Chironomus riparius|LN894265||BOLD:AAA7263  
Chironomus riparius|LN894283||BOLD:AAA7263  
Chironomus riparius|LN894247||BOLD:AAA7263  
Chironomus riparius|LN894290||BOLD:AAA7263  
Chironomus riparius|LN894339||BOLD:AAA7263  
Chironomus riparius|LN894276||BOLD:AAA7263  
Chironomus riparius|LN894524||BOLD:AAA7263









Chironomus riparius|LN894452||BOLD:AAA7263  
Chironomus riparius|LN894476||BOLD:AAA7263  
Chironomus riparius|LN894484||BOLD:AAA7263  
Chironomus riparius|LN894595||BOLD:AAA7263  
Chironomus riparius|LN894597||BOLD:AAA7263  
Chironomus riparius|LN894603||BOLD:AAA7263  
Chironomus riparius|LN894614||BOLD:AAA7263  
Chironomus riparius|LN894620||BOLD:AAA7263  
Chironomus riparius|LN894433||BOLD:AAA7263  
Chironomus riparius|LN894623||BOLD:AAA7263  
Chironomus riparius|LN894626||BOLD:AAA7263  
Chironomus riparius|LN894624||BOLD:AAA7263  
Chironomus riparius|LN894627  
Chironomus riparius|LN894368||BOLD:AAA7263  
Chironomus riparius|LN894622||BOLD:AAA7263  
Chironomus riparius|LN894621||BOLD:AAA7263  
Chironomus riparius|LN894625||BOLD:AAA7263  
Chironomus riparius|LN894303||BOLD:AAA7263  
Chironomus|BIOUG36853-C03|Kate Perez|BIN Taxonomy Match (Jul 2018)|BOLD:AAA7263  
Chironomus riparius|LN894497||BOLD:AAA7263  
Chironomus riparius|LN894498||BOLD:AAA7263  
Chironomus riparius|LN894499||BOLD:AAA7263  
Chironomus riparius|LN894500||BOLD:AAA7263  
Chironomus riparius|LN894501||BOLD:AAA7263  
Chironomus riparius|LN894516||BOLD:AAA7263  
Chironomus riparius|LN894550||BOLD:AAA7263  
Chironomus riparius|LN894549||BOLD:AAA7263  
Chironomus riparius|LN894541||BOLD:AAA7263  
Chironomus riparius|LN894274||BOLD:AAA7263  
Chironomus riparius|LN894537||BOLD:AAA7263  
Chironomus riparius|LN894532||BOLD:AAA7263  
Chironomus riparius|LN894322||BOLD:AAA7263  
Chironomus riparius|LN894512||BOLD:AAA7263  
Chironomus riparius|LN894198||BOLD:AAA7263  
Chironomus riparius|LN894315||BOLD:AAA7263  
Chironomus riparius|LN894257||BOLD:AAA7263  
Chironomus riparius|LN894320||BOLD:AAA7263  
Chironomus riparius|LN894298||BOLD:AAA7263  
Chironomus riparius|LN894244||BOLD:AAA7263  
Chironomus riparius|LN894254||BOLD:AAA7263  
Chironomus riparius|LN894341||BOLD:AAA7263  
Chironomus riparius|LN894370||BOLD:AAA7263  
Chironomus riparius|LN894211||BOLD:AAA7263  
Chironomus riparius|LN894221||BOLD:AAA7263  
Chironomus riparius|LN894319||BOLD:AAA7263  
Chironomus riparius|LN894269||BOLD:AAA7263  
Chironomus riparius|LN894294||BOLD:AAA7263  
Chironomus riparius|LN894213||BOLD:AAA7263  
Chironomus riparius|LN894201||BOLD:AAA7263  
Chironomus riparius|LN894226||BOLD:AAA7263  
Chironomus riparius|LN894343||BOLD:AAA7263  
Chironomus riparius|LN894212||BOLD:AAA7263  
Chironomus riparius|LN894266||BOLD:AAA7263  
Chironomus riparius|LN894239||BOLD:AAA7263  
Chironomus riparius|LN894310||BOLD:AAA7263  
Chironomus riparius|LN894235||BOLD:AAA7263  
Chironomus riparius|LN894202||BOLD:AAA7263  
Chironomus riparius|LN894245||BOLD:AAA7263  
Chironomus riparius|LN894327||BOLD:AAA7263  
Chironomus riparius|LN894262||BOLD:AAA7263  
Chironomus riparius|LN894295||BOLD:AAA7263  
Chironomus riparius|LN894323||BOLD:AAA7263  
Chironomus riparius|LN894335||BOLD:AAA7263  
Chironomus riparius|LN894302||BOLD:AAA7263  
Chironomus riparius|LN894253||BOLD:AAA7263  
Chironomus riparius|LN894230||BOLD:AAA7263  
Chironomus riparius|LN894242||BOLD:AAA7263  
Chironomus riparius|LN894228||BOLD:AAA7263  
Chironomus riparius|LN894348||BOLD:AAA7263  
Chironomus riparius|LN894309||BOLD:AAA7263  
Chironomus riparius|LN894331||BOLD:AAA7263  
Chironomus riparius|LN894214||BOLD:AAA7263  
Chironomus riparius|LN894225||BOLD:AAA7263  
Chironomus riparius|LN894278||BOLD:AAA7263  
Chironomus riparius|LN894281||BOLD:AAA7263  
Chironomus riparius|OL911048||BOLD:AAA7263  
Chironomus|4035755211||BOLD:AAJ4282  
Chironomus luridus|LA\_LSLRZ9\_57|Piotr Gadawski||BOLD:AAJ4282  
Chironomus luridus|LA\_LSLRZ9\_97|Piotr Gadawski||BOLD:AAJ4282  
Chironomus luridus|LA\_LSLRZ9\_58|Piotr Gadawski||BOLD:AAJ4282  
Chironomus luridus|LA\_LSLRZ9\_226|Piotr Gadawski|Morphology|BOLD:AAJ4282  
Chironomus luridus|LA\_LSLRZ9\_99|Piotr Gadawski||BOLD:AAJ4282  
Chironomus luridus|LA\_AS\_L2\_35|Piotr Gadawski||BOLD:AAJ4282  
Chironomus luridus|LA\_LSLRZ9\_223|Piotr Gadawski|Morphology|BOLD:AAJ4282  
Chironomus luridus|RIN\_CH54|Mona Renate Saurseth|BOLD Identification engine|BOLD:AAJ4282  
Chironomus luridus|LA\_LSLRZ9\_230|Piotr Gadawski|Morphology|BOLD:AAJ4282  
Chironomus luridus|LA\_LSLRZ9\_239|Piotr Gadawski|Morphology|BOLD:AAJ4282  
Chironomus luridus|LA\_LSLRZ9\_221|Piotr Gadawski|Morphology|BOLD:AAJ4282  
Chironomus luridus|TRD-CH379|Elisabeth Sturjormorphology|BOLD:AAJ4282  
Chironomus luridus|TRD-CH358|Elisabeth Sturjormorphology|BOLD:AAJ4282  
Chironomus luridus|LA\_LSLRZ9\_241|Piotr Gadawski|Morphology|BOLD:AAJ4282  
Chironomus luridus|TRD-CH376|Elisabeth Sturjormorphology|BOLD:AAJ4282  
Chironomus luridus|RIN\_CH38|BOLD Identification engine|BOLD:AAJ4282  
Chironomus luridus|RIN\_CH53|Elisabeth Sturjormorphology|BOLD:AAJ4282  
Chironomus luridus|BIOUG16626-H10|Kate Perez|BIN Taxonomy Match|BOLD:AAJ4282  
Chironomus luridus|TRD-CH155|Elisabeth Sturjormorphology|BOLD:AAJ4282  
Chironomus|BIOUG55199-D06|Stefan Schmidt|BIN Taxonomy Match (Sep 2020)|BOLD:AAJ4282  
Chironomus|BIOUG55421-B05|Stefan Schmidt|BIN Taxonomy Match (Sep 2020)|BOLD:AAJ4282  
Chironomus luridus|LA\_LSLRZ9\_225|Piotr Gadawski|Morphology|BOLD:AAJ4282  
Chironomus nr. pseudohummi|ZMUO.024748|Lauri Paasivirta||BOLD:AAJ4282  
Chironomus nr. riparius|ZMUO.025192|Lauri Paasivirta||BOLD:AAJ4282  
Chironomus nr. riparius|ZMUO.024539|Lauri Paasivirta||BOLD:AAJ4282  
Chironomus nr. riparius|ZMUO.024661|Lauri Paasivirta||BOLD:AAJ4282

Chironomus nr. pseudothummi|ZMUO.024740|Lauri Paasivirta|BOLD:AAJ4282  
 Chironomus nr. riparius|ZMUO.025192|Lauri Paasivirta|BOLD:AAJ4282  
 Chironomus nr. riparius|ZMUO.024539|Lauri Paasivirta|BOLD:AAJ4282  
 Chironomus nr. riparius|ZMUO.024906|Lauri Paasivirta|BOLD:AAJ4282  
 Chironomus nr. riparius|ZMUO.024918|Lauri Paasivirta|BOLD:AAJ4282  
 Chironomus nr. riparius|ZMUO.024907|Lauri Paasivirta|BOLD:AAJ4282  
 Chironomus|ZSM-DIP-33129-D07|Caroline Chimeno|BIN Taxonomy Match (Jan 2022)|BOLD:AAJ4282  
 Chironomus|BIOUG42967-A06|Kate Perez|BIN Taxonomy Match below Phylum (Jun 2019)|BOLD:AAJ...  
 Chironomus|ZSM-DIP-33142-G06|Caroline Chimeno|BIN Taxonomy Match (Jan 2022)|BOLD:AAJ4282  
 Chironomus|ZSM-DIP-33133-A01|Caroline Chimeno|BIN Taxonomy Match (Jan 2022)|BOLD:AAJ4282  
 Chironomus|ZSM-DIP-33128-G11|Caroline Chimeno|BIN Taxonomy Match (Jan 2022)|BOLD:AAJ4282  
 Chironomus|BIOUG42718-F02|Kate Perez|BIN Taxonomy Match below Phylum (Jun 2019)|BOLD:AAJ...  
 Chironomus|BIOUG42948-B09|Kate Perez|BIN Taxonomy Match below Phylum (Jun 2019)|BOLD:AAJ...  
 Chironomus|ZSM-DIP-33145-G01|Caroline Chimeno|BIN Taxonomy Match (Jan 2022)|BOLD:AAJ4282  
 Chironomus|ZSM-DIP-33145-H06|Caroline Chimeno|BIN Taxonomy Match (Jan 2022)|BOLD:AAJ4282  
 Chironomus|ZSM-DIP-33149-E02|Caroline Chimeno|BIN Taxonomy Match (Jan 2022)|BOLD:AAJ4282  
 Chironomus|ZSM-DIP-33129-F09|Caroline Chimeno|BIN Taxonomy Match (Jan 2022)|BOLD:AAJ4282  
 Chironomus|BIOUG42939-A04|Kate Perez|BIN Taxonomy Match below Phylum (Jun 2019)|BOLD:AAJ...  
 Chironomus luridus|LA\_AS\_L1\_31|Piotr Gadawski|BOLD:AAJ4282  
 Chironomus nr. riparius|ZMUO.024538|Lauri Paasivirta|BOLD:AAJ4282  
 Chironomus|BIOUG42723-A11|Kate Perez|BIN Taxonomy Match below Phylum (Jun 2019)|BOLD:AAJ...  
 Chironomus|ZSM-DIP-33144-F12|Caroline Chimeno|BIN Taxonomy Match (Jan 2022)|BOLD:AAJ4282  
 Chironomus|ZSM-DIP-33144-E08|Caroline Chimeno|BIN Taxonomy Match (Jan 2022)|BOLD:AAJ4282  
 Chironomus|ZSM-DIP-33144-E07|Caroline Chimeno|BIN Taxonomy Match (Jan 2022)|BOLD:AAJ4282  
 Chironomus|ZSM-DIP-33137-F12|Caroline Chimeno|BIN Taxonomy Match (Jan 2022)|BOLD:AAJ4282  
 Chironomus nr. riparius|ZMUO.025193|Lauri Paasivirta|BOLD:AAJ4282  
 Chironomus aprilius|NHRS-BYWS00000438|Yngve Brodin|morphology|BOLD:AAF3277  
 Chironomus aprilius|NHRS-BYWS000001779|Yngve Brodin|BOLD:AAF3277  
 Chironomus aprilius|ZMUO.026122|Lauri Paasivirta|BOLD:AAF3277  
 Chironomus aprilius|NHRS-BYWS000001781|Yngve Brodin|BOLD:AAF3277  
 Chironomus aprilius|NHRS-BYWS000000475|Yngve Brodin|morphology|BOLD:AAF3277  
 Chironomus aprilius|NHRS-BYWS000001780|Yngve Brodin|BOLD:AAF3277  
 Chironomus aprilius|EJV-20110245|Lauri Paasivirta|BOLD:AAF3277  
 Chironomus aprilius|NHRS-BYWS000000954|Yngve Brodin|morphology|BOLD:AAF3277  
 Chironomus aprilius|NHRS-BYWS000000235|Yngve Brodin|morphology|BOLD:AAF3277  
 Chironomus aprilius|NHRS-BYWS000000901|Yngve Brodin|morphology|BOLD:AAF3277  
 Chironomus aprilius|NHRS-BYWS000000353|Yngve Brodin|morphology|BOLD:AAF3277  
 Chironomus aprilius|NHRS-BYWS000000175|Yngve Brodin|morphology|BOLD:AAF3277  
 Chironomus aprilius|NHRS-BYWS000001064|Yngve Brodin|morphology|BOLD:AAF3277  
 Chironomus aprilius|NHRS-BYWS000000276|Yngve Brodin|morphology|BOLD:AAF3277  
 Chironomus aprilius|NHRS-BYWS000000236|Yngve Brodin|morphology|BOLD:AAF3277  
 Chironomus aprilius|NHRS-BYWS000000176|Yngve Brodin|morphology|BOLD:AAF3277  
 Chironomus nr. pseudothummi|ZMUO.025359|Lauri Paasivirta|BOLD:AAF3277  
 Chironomus nr. pseudothummi|ZMUO.025358|Lauri Paasivirta|BOLD:AAF3277  
 Chironomus aprilius|ZMUO.026121|Lauri Paasivirta|BOLD:AAF3277  
 Chironomus aprilius|NHRS-BYWS000000416|Yngve Brodin|morphology|BOLD:AAF3277  
 Chironomus aprilius|NHRS-BYWS000000174|Yngve Brodin|morphology|BOLD:AAF3277  
 Chironomus sollicitus|ATNA78|Elisabeth Stur|BOLD:AAI4306  
 Chironomus sp. 1TE|Finmark340|Torbjorn Ekrem|BOLD:AAI4309  
 Chironomus riparius|NHRS-BYWS000001160|Yngve Brodin|morphology|BOLD:AAI4307  
 Chironomus riparius|NHRS-BYWS000001159|Yngve Brodin|morphology|BOLD:AAI4307  
 Chironomus sp. 10TE|ATNA340|Torbjorn Ekrem|BOLD:AAI4307  
 Chironomus sp. 10TE|CH-OSF180|Torbjorn Ekrem|BOLD:AAI4307  
 Chironomus nr. sollicitus|ZMUO.024594|Lauri Paasivirta|BOLD:AAI4307  
 Chironomus melanescens|Finmark688|Torbjorn Ekrem|BOLD:AAI4307  
 Chironomus|ZSM-DIP-33128-E05|Caroline Chimeno|BIN Taxonomy Match (Jan 2022)|BOLD:AAI4307  
 Chironomus nr. sollicitus|ZMUO.024595|Lauri Paasivirta|BOLD:AAI4307  
 Chironomus nr. sollicitus|ZMUO.024888|Lauri Paasivirta|BOLD:AAI4307  
 Chironomus cf. sollicitus|NHRS-BYWS000001082|Yngve Brodin|morphology|BOLD:AAI4299  
 Chironomus|SOE263|Torbjorn Ekrem|BOLD:AAI4299  
 Chironomus|RIN\_CH46|Mona Renate Saurasunet|BOLD Identification engine|BOLD:AAI4299  
 Chironomus|RIN\_CH52|Mona Renate Saurasunet|BOLD Identification engine|BOLD:AAI4299  
 Chironomus|BIOUG42931-H04|Kate Perez|BIN Taxonomy Match below Phylum (Jun 2019)|BOLD:AAI...  
 Chironomus|BIOUG42927-G11|Kate Perez|BIN Taxonomy Match below Phylum (Jun 2019)|BOLD:AAI...  
 Chironomus|BIOUG42923-C07|Kate Perez|BIN Taxonomy Match below Phylum (Jun 2019)|BOLD:AAI...  
 Chironomus|ZSM-DIP-33139-A02|Caroline Chimeno|BIN Taxonomy Match (Jan 2022)|BOLD:AAW4001  
 Chironomus|ZSM-DIP-33146-D03|Caroline Chimeno|BIN Taxonomy Match (Jan 2022)|BOLD:AAW4001  
 Chironomus alpestris|ZSM34342-E09|Martin Spies|Morphology|BOLD:AAW4001  
 Chironomus alpestris|ZSM34342-D01|Martin Spies|Morphology|BOLD:AAW4001  
 Chironomus|ZSM-DIP-33139-A03|Caroline Chimeno|BIN Taxonomy Match (Jan 2022)|BOLD:AAW4001  
 Chironomus dorsalis|BIOUG42691-G06|Kate Perez|BIN Taxonomy Match below Phylum (Jun 2019)|BO...  
 Chironomus dorsalis|BIOUG42691-A02|Kate Perez|BIN Taxonomy Match below Phylum (Jun 2019)|BO...  
 Chironomus pseudothummi|CH-OSF190|Torbjorn Ekrem|BOLD:ABZ0429  
 Chironomus NHRS sp. A|NHRS-BYWS0000001130|Yngve Brodin|morphology|BOLD:ABZ0429  
 Chironomus nr. pseudothummi|ZMUO.024813|Lauri Paasivirta|BOLD:ABZ0429  
 Chironomus nr. pseudothummi|ZMUO.024749|Lauri Paasivirta|BOLD:ABZ0429  
 Chironomus pseudothummi|CH-OSF36|Torbjorn Ekrem|BOLD:ABZ0429  
 Chironomus nr. pseudothummi|ZMUO.024949|Lauri Paasivirta|BOLD:ADL5630  
 Chironomus sp. TE11|Finmark434|Torbjorn Ekrem|BOLD:ADL5630  
 Chironomus sp. TE11|Finmark725|Torbjorn Ekrem|BOLD:ADL5630  
 Chironomus sp. TE11|Finmark578|Torbjorn Ekrem|BOLD:ADL5630  
 Chironomus sp. TE11|TRD-CH299|Elisabeth Stur|BOLD:ADL5630  
 Chironomus nr. pseudothummi|ZMUO.024950|Lauri Paasivirta|BOLD:ADL5630  
 Chironomus sp. TE11|TRD-CH378|Elisabeth Stur|morphology|BOLD:ADL5630  
 Chironomus sp. TE11|CH-OSF86|Torbjorn Ekrem|BOLD:ADL5630  
 Chironomus sp. TE11|Finmark166|Torbjorn Ekrem|BOLD:ADL5630  
 Chironomus sp. TE11|ATNA339|Torbjorn Ekrem|BOLD:ADL5630  
 Chironomus sp. TE11|TRD-CH228|Elisabeth Stur|BOLD:ADL5630  
 Chironomus sp. TE11|Finmark304|Torbjorn Ekrem|BOLD:ADL5630  
 Chironomus|ZSM-DIP-33138-C01|Caroline Chimeno|BIN Taxonomy Match (Jan 2022)|BOLD:ADL5630  
 Chironomus|BIOUG55415-G10|Stefan Schmidt|BIN Taxonomy Match (Sep 2020)|BOLD:ADL5630  
 Chironomus|BIOUG42736-A09|Kate Perez|BIN Taxonomy Match below Phylum (Jul 2019)|BOLD:ADL...  
 Chironomus|BIOUG42941-A08|Kate Perez|BIN Taxonomy Match below Phylum (Jul 2019)|BOLD:ADL...  
 Chironomus|BIOUG42762-F07|Kate Perez|BIN Taxonomy Match below Phylum (Jul 2019)|BOLD:ADL...  
 Chironomus sp. 6TE|Finmark357|Torbjorn Ekrem|BOLD:AAV3581  
 Chironomus heteropilicornis|TRD-CH266|Elisabeth Stur|BOLD:ACX5781  
 Chironomus heteropilicornis|TRD-CH269|Elisabeth Stur|BOLD:ACX5781  
 Chironomus pilicornis|NHRS-BYWS000001079|Yngve Brodin|morphology|BOLD:ACX5781  
 Chironomus heteropilicornis|TRD-CH268|Elisabeth Stur|BOLD:ACX5781  
 Chironomus heteropilicornis|TRD-CH267|Elisabeth Stur|BOLD:ACX5781  
 Chironomus pilicornis|NHRS-BYWS000001080|Yngve Brodin|morphology|BOLD:ACX5781  
 Chironomus heteropilicornis|TRD-CH410|Elisabeth Stur|morphology|BOLD:ACX5781  
 Chironomus riihimakiensis|ZMUO.024922|Lauri Paasivirta|BOLD:AAW3994

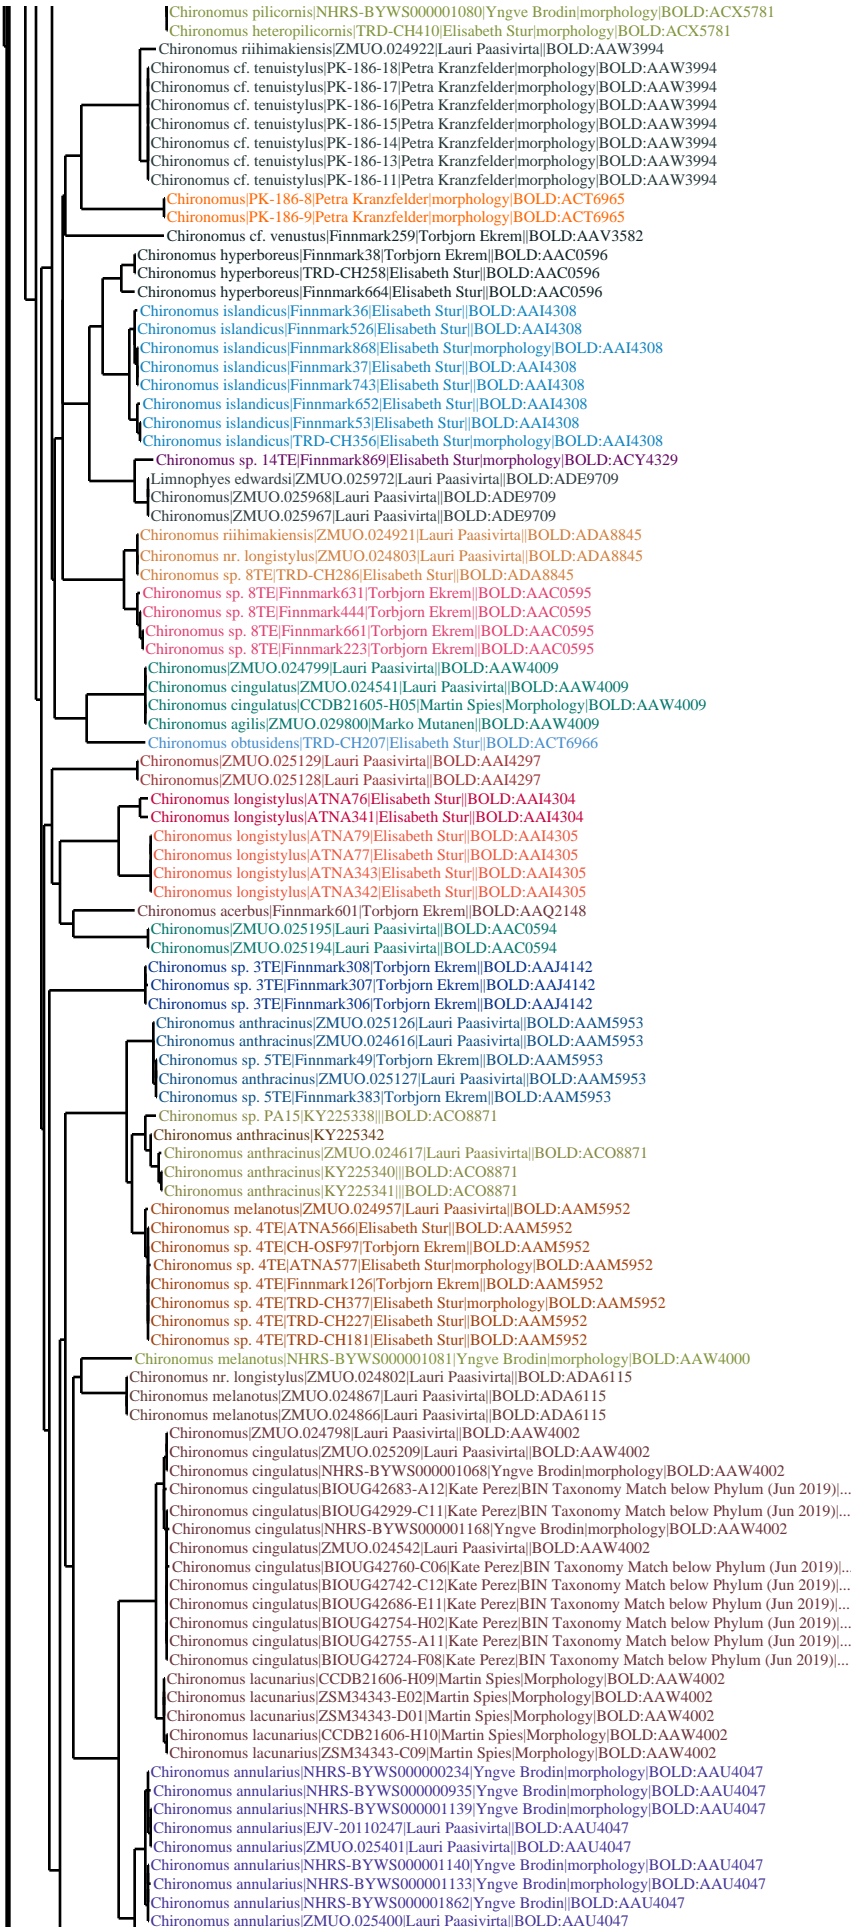

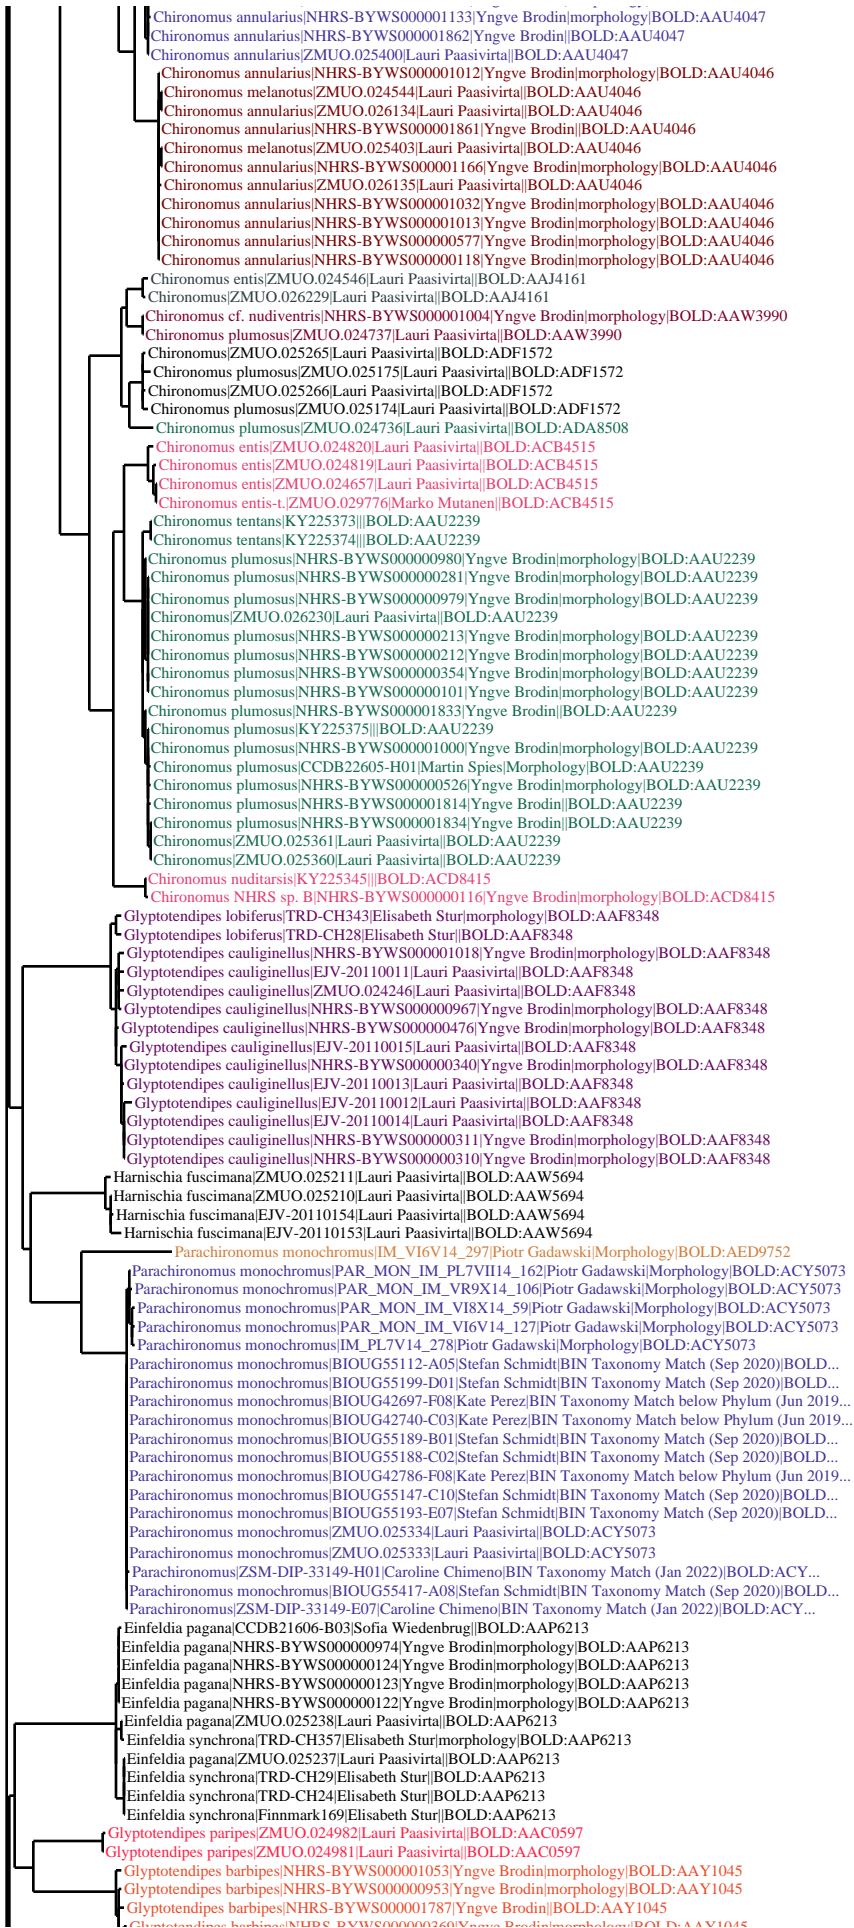

*Glyptotendipes barbipes*[NHRS-BYWS000000953]Yngve Brodin[morphology]BOLD:AA1045  
*Glyptotendipes barbipes*[NHRS-BYWS000001787]Yngve Brodin[BOLD:AA1045  
*Glyptotendipes barbipes*[NHRS-BYWS000000369]Yngve Brodin[morphology]BOLD:AA1045  
*Glyptotendipes barbipes*[ZMUO.025272]Lauri Paasivirta[BOLD:AA1045  
*Glyptotendipes barbipes*[ZMUO.025271]Lauri Paasivirta[BOLD:AA1045  
*Glyptotendipes barbipes*[NHRS-BYWS000000360]Yngve Brodin[morphology]BOLD:AA1045  
*Glyptotendipes barbipes*[NHRS-BYWS000000464]Yngve Brodin[morphology]BOLD:AA1045  
*Glyptotendipes barbipes*[NHRS-BYWS000001181]Yngve Brodin[morphology]BOLD:AA1045  
*Parachironomus digitalis*[BIOUG16257-C05]Kate Perez[BIN Taxonomy Match]BOLD:AA6555  
*Parachironomus digitalis*[BIOUG16299-A02]Kate Perez[BIN Taxonomy Match]BOLD:AA6555  
*Parachironomus digitalis*[BIOUG16329-D01]Kate Perez[BIN Taxonomy Match]BOLD:AA6555  
*Parachironomus digitalis*[EJV-20110145]Lauri Paasivirta[BOLD:AA6555  
*Parachironomus digitalis*[ZMUO.024794]Lauri Paasivirta[BOLD:AA6555  
*Parachironomus digitalis*[ZSM-DIP-33139-F06]Caroline Chimeno[BIN Taxonomy Match (Jan 2022)]B...  
*Parachironomus digitalis*[ZSM-DIP-33139-F08]Caroline Chimeno[BIN Taxonomy Match (Jan 2022)]B...  
*Parachironomus digitalis*[Finmark176]Torbjorn Ekrem[BOLD:AA6555  
*Parachironomus digitalis*[ZMUO.024795]Lauri Paasivirta[BOLD:AA6555  
*Parachironomus digitalis*[NHRS-BYWS000000138]Yngve Brodin[morphology]BOLD:AA6555  
*Parachironomus digitalis*[BIOUG16260-G04]Kate Perez[BIN Taxonomy Match]BOLD:AA6555  
*Parachironomus digitalis*[BIOUG16259-E09]Kate Perez[BIN Taxonomy Match]BOLD:AA6555  
*Parachironomus digitalis*[BIOUG16258-D10]Kate Perez[BIN Taxonomy Match]BOLD:AA6555  
*Limnophyes minimus*[BIOUG07930-G03]Kate Perez[BIN Taxonomy Match]BOLD:AAA8204  
*Limnophyes minimus*[ZSM-DIP-33131-E05]Caroline Chimeno[BIN Taxonomy Match (Jan 2022)]BOLD ...  
*Limnophyes minimus*[BIOUG15808-F05]Kate Perez[BIN Taxonomy Match]BOLD:AAA8204  
*Limnophyes minimus*[BIOUG15537-F05]Kate Perez[BIN Taxonomy Match]BOLD:AAA8204  
*Limnophyes minimus*[BIOUG42932-A03]Kate Perez[BIN Taxonomy Match below Phylum (Jun 2019)]BOL...  
*Limnophyes minimus*[BIOUG15963-D06]Kate Perez[BIN Taxonomy Match]BOLD:AAA8204  
*Limnophyes minimus*[BIOUG08129-A07]Kate Perez[BIN Taxonomy Match]BOLD:AAA8204  
*Limnophyes minimus*[BIOUG07509-E06]Kate Perez[BIN Taxonomy Match]BOLD:AAA8204  
*Limnophyes minimus*[BIOUG15977-A08]Kate Perez[BIN Taxonomy Match]BOLD:AAA8204  
*Limnophyes minimus*[BIOUG15794-D11]Kate Perez[BIN Taxonomy Match]BOLD:AAA8204  
*Limnophyes minimus*[BIOUG15806-B06]Kate Perez[BIN Taxonomy Match]BOLD:AAA8204  
*Limnophyes minimus*[BIOUG07944-D04]Kate Perez[BIN Taxonomy Match]BOLD:AAA8204  
*Limnophyes minimus*[BIOUG07566-D12]Kate Perez[BIN Taxonomy Match]BOLD:AAA8204  
*Limnophyes minimus*[BIOUG15542-F12]Kate Perez[BIN Taxonomy Match]BOLD:AAA8204  
*Limnophyes minimus*[BIOUG16594-F08]Kate Perez[BIN Taxonomy Match]BOLD:AAA8204  
*Limnophyes minimus*[BIOUG36726-H06]Kate Perez[BIN Taxonomy Match (May 2018)]BOLD:AAA8204  
*Limnophyes minimus*[BIOUG15544-C04]Kate Perez[BIN Taxonomy Match]BOLD:AAA8204  
*Limnophyes minimus*[BIOUG08255-G04]Kate Perez[BIN Taxonomy Match]BOLD:AAA8204  
*Limnophyes minimus*[BIOUG06100-G04]Kate Perez[BIN Taxonomy Match]BOLD:AAA8204  
*Limnophyes minimus*[BIOUG05947-B08]Kate Perez[BIN Taxonomy Match]BOLD:AAA8204  
*Limnophyes minimus*[BIOUG06065-H03]Kate Perez[BIN Taxonomy Match]BOLD:AAA8204  
*Limnophyes minimus*[BIOUG15951-A06]Kate Perez[BIN Taxonomy Match]BOLD:AAA8204  
*Limnophyes minimus*[BIOUG06054-A10]Kate Perez[BIN Taxonomy Match]BOLD:AAA8204  
*Limnophyes minimus*[BIOUG06054-H04]Kate Perez[BIN Taxonomy Match]BOLD:AAA8204  
*Limnophyes minimus*[BIOUG15538-A01]Kate Perez[BIN Taxonomy Match]BOLD:AAA8204  
*Limnophyes minimus*[BIOUG15539-F01]Kate Perez[BIN Taxonomy Match]BOLD:AAA8204  
*Limnophyes minimus*[BIOUG05900-E07]Kate Perez[BIN Taxonomy Match]BOLD:AAA8204  
*Limnophyes minimus*[BIOUG05900-G01]Kate Perez[BIN Taxonomy Match]BOLD:AAA8204  
*Limnophyes minimus*[BIOUG15458-A06]Kate Perez[BIN Taxonomy Match]BOLD:AAA8204  
*Limnophyes minimus*[BIOUG06053-E09]Kate Perez[BIN Taxonomy Match]BOLD:AAA8204  
*Limnophyes minimus*[BIOUG05780-A03]Kate Perez[BIN Taxonomy Match]BOLD:AAA8204  
*Limnophyes minimus*[BIOUG05944-F03]Kate Perez[BIN Taxonomy Match]BOLD:AAA8204  
*Limnophyes minimus*[BIOUG05945-B05]Kate Perez[BIN Taxonomy Match]BOLD:AAA8204  
*Limnophyes minimus*[BIOUG15539-C12]Kate Perez[BIN Taxonomy Match]BOLD:AAA8204  
*Limnophyes minimus*[BIOUG07405-B12]Kate Perez[BIN Taxonomy Match]BOLD:AAA8204  
*Limnophyes minimus*[CCDB24038-A06]Sofia Wiedenbrug[BIN Taxonomy Match]BOLD:AAA8204  
*Limnophyes minimus*[BIOUG15543-G12]Kate Perez[BIN Taxonomy Match]BOLD:AAA8204  
*Limnophyes minimus*[BIOUG15561-C12]Kate Perez[BIN Taxonomy Match]BOLD:AAA8204  
*Limnophyes minimus*[BIOUG15561-H04]Kate Perez[BIN Taxonomy Match]BOLD:AAA8204  
*Limnophyes minimus*[BIOUG15795-F03]Kate Perez[BIN Taxonomy Match]BOLD:AAA8204  
*Limnophyes minimus*[BIOUG15795-F11]Kate Perez[BIN Taxonomy Match]BOLD:AAA8204  
*Limnophyes minimus*[BIOUG16596-A10]Kate Perez[BIN Taxonomy Match]BOLD:AAA8204  
*Limnophyes minimus*[BIOUG16597-D07]Kate Perez[BIN Taxonomy Match]BOLD:AAA8204  
*Limnophyes minimus*[BIOUG15651-A09]Kate Perez[BIN Taxonomy Match]BOLD:AAA8204  
*Limnophyes minimus*[CCDB24183-H10]Sofia Wiedenbrug[BIN-taxonomy]BOLD:AAA8204  
*Limnophyes minimus*[BIOUG08319-H05]Kate Perez[BIN Taxonomy Match]BOLD:AAA8204  
*Limnophyes minimus*[BIOUG15977-D05]Kate Perez[BIN Taxonomy Match]BOLD:AAA8204  
*Limnophyes minimus*[BIOUG15464-E04]Kate Perez[BIN Taxonomy Match]BOLD:AAA8204  
*Limnophyes minimus*[BIOUG15544-G06]Kate Perez[BIN Taxonomy Match]BOLD:AAA8204  
*Limnophyes minimus*[BIOUG05900-D03]Kate Perez[BIN Taxonomy Match]BOLD:AAA8204  
*Limnophyes minimus*[BIOUG16214-F12]Kate Perez[BIN Taxonomy Match]BOLD:AAA8204  
*Limnophyes minimus*[BIOUG04437-H01]Kate Perez[BIN Taxonomy Match]BOLD:AAA8204  
*Limnophyes minimus*[BIOUG04437-D11]Kate Perez[BIN Taxonomy Match]BOLD:AAA8204  
*Limnophyes minimus*[BIOUG06053-G06]Kate Perez[BIN Taxonomy Match]BOLD:AAA8204  
*Limnophyes minimus*[BIOUG05944-A12]Kate Perez[BIN Taxonomy Match]BOLD:AAA8204  
*Limnophyes minimus*[ZSM-DIP-33148-B09]Caroline Chimeno[BIN Taxonomy Match (Jan 2022)]BOLD ...  
*Limnophyes minimus*[ZSM-DIP-33148-B11]Caroline Chimeno[BIN Taxonomy Match (Jan 2022)]BOLD ...  
*Limnophyes minimus*[BIOUG42946-G01]Kate Perez[BIN Taxonomy Match below Phylum (Jun 2019)]BOL...  
*Limnophyes minimus*[BIOUG08259-F11]Kate Perez[BIN Taxonomy Match]BOLD:AAA8204  
*Limnophyes minimus*[BIOUG15455-F09]Kate Perez[BIN Taxonomy Match]BOLD:AAA8204  
*Limnophyes minimus*[BIOUG15456-B05]Kate Perez[BIN Taxonomy Match]BOLD:AAA8204  
*Limnophyes minimus*[BIOUG15761-E10]Kate Perez[BIN Taxonomy Match]BOLD:AAA8204  
*Limnophyes minimus*[BIOUG05396-H07]Kate Perez[BIN Taxonomy Match]BOLD:AAA8204  
*Limnophyes minimus*[BIOUG15765-D05]Kate Perez[BIN Taxonomy Match]BOLD:AAA8204  
*Limnophyes minimus*[BIOUG15799-C06]Kate Perez[BIN Taxonomy Match]BOLD:AAA8204  
*Limnophyes minimus*[BIOUG05778-C09]Kate Perez[BIN Taxonomy Match]BOLD:AAA8204  
*Limnophyes minimus*[BIOUG15543-A12]Kate Perez[BIN Taxonomy Match]BOLD:AAA8204  
*Limnophyes minimus*[BIOUG08127-F05]Kate Perez[BIN Taxonomy Match]BOLD:AAA8204  
*Limnophyes minimus*[BIOUG15791-H05]Kate Perez[BIN Taxonomy Match]BOLD:AAA8204  
*Limnophyes minimus*[BIOUG16208-C04]Kate Perez[BIN Taxonomy Match]BOLD:AAA8204  
*Limnophyes minimus*[BIOUG15792-F08]Kate Perez[BIN Taxonomy Match]BOLD:AAA8204  
*Limnophyes minimus*[BIOUG15807-F04]Kate Perez[BIN Taxonomy Match]BOLD:AAA8204  
*Limnophyes minimus*[BIOUG15808-C08]Kate Perez[BIN Taxonomy Match]BOLD:AAA8204  
*Limnophyes minimus*[BIOUG15808-E06]Kate Perez[BIN Taxonomy Match]BOLD:AAA8204  
*Limnophyes minimus*[BIOUG15808-G09]Kate Perez[BIN Taxonomy Match]BOLD:AAA8204  
*Limnophyes minimus*[BIOUG16551-E04]Kate Perez[BIN Taxonomy Match]BOLD:AAA8204  
*Limnophyes minimus*[BIOUG16214-E09]Kate Perez[BIN Taxonomy Match]BOLD:AAA8204  
*Limnophyes minimus*[BIOUG15454-D02]Kate Perez[BIN Taxonomy Match]BOLD:AAA8204  
*Limnophyes minimus*[BIOUG07755-C08]Kate Perez[BIN Taxonomy Match]BOLD:AAA8204  
*Limnophyes minimus*[BIOUG16596-F12]Kate Perez[BIN Taxonomy Match]BOLD:AAA8204  
*Limnophyes minimus*[BIOUG16597-E07]Kate Perez[BIN Taxonomy Match]BOLD:AAA8204



Limnophyes minimus|BIOUG01155-C08|Kate Perez|BIN Taxonomy Match|BOLD:AAA8204  
Limnophyes minimus|BIOUG16596-F12|Kate Perez|BIN Taxonomy Match|BOLD:AAA8204  
Limnophyes minimus|BIOUG16597-E07|Kate Perez|BIN Taxonomy Match|BOLD:AAA8204  
Limnophyes minimus|BIOUG07758-E05|Kate Perez|BIN Taxonomy Match|BOLD:AAA8204  
Limnophyes minimus|BIOUG07414-H04|Kate Perez|BIN Taxonomy Match|BOLD:AAA8204  
Limnophyes minimus|BIOUG15855-G04|Kate Perez|BIN Taxonomy Match|BOLD:AAA8204  
Limnophyes minimus|BIOUG15455-G02|Kate Perez|BIN Taxonomy Match|BOLD:AAA8204  
Limnophyes minimus|BIOUG07410-E11|Kate Perez|BIN Taxonomy Match|BOLD:AAA8204  
Limnophyes minimus|BIOUG15185-D06|Kate Perez|BIN Taxonomy Match|BOLD:AAA8204  
Limnophyes minimus|BIOUG06280-F10|Kate Perez|BIN Taxonomy Match|BOLD:AAA8204  
Limnophyes minimus|BIOUG05945-E05|Kate Perez|BIN Taxonomy Match|BOLD:AAA8204  
Limnophyes minimus|BIOUG16594-F07|Kate Perez|BIN Taxonomy Match|BOLD:AAA8204  
Limnophyes minimus|BIOUG08174-B02|Kate Perez|BIN Taxonomy Match|BOLD:AAA8204  
Limnophyes minimus|BIOUG15538-D04|Kate Perez|BIN Taxonomy Match|BOLD:AAA8204  
Limnophyes minimus|BIOUG05110-H02|Kate Perez|BIN Taxonomy Match|BOLD:AAA8204  
Limnophyes minimus|BIOUG05141-C05|Kate Perez|BIN Taxonomy Match|BOLD:AAA8204  
Limnophyes minimus|BIOUG05141-E02|Kate Perez|BIN Taxonomy Match|BOLD:AAA8204  
Limnophyes minimus|BIOUG04114-C10|Kate Perez|BIN Taxonomy Match|BOLD:AAA8204  
Limnophyes minimus|BIOUG04366-B08|Kate Perez|BIN Taxonomy Match|BOLD:AAA8204  
Limnophyes minimus|BIOUG05109-D03|Kate Perez|BIN Taxonomy Match|BOLD:AAA8204  
Limnophyes minimus|BIOUG15542-D10|Kate Perez|BIN Taxonomy Match|BOLD:AAA8204  
Limnophyes minimus|BIOUG05144-D02|Kate Perez|BIN Taxonomy Match|BOLD:AAA8204  
Limnophyes minimus|BIOUG04366-G07|Kate Perez|BIN Taxonomy Match|BOLD:AAA8204  
Limnophyes minimus|BIOUG05945-E09|Kate Perez|BIN Taxonomy Match|BOLD:AAA8204  
Limnophyes minimus|CCDB24183-G09|Sofia Wiedenbrug|BIN-taxonomy|BOLD:AAA8204  
Limnophyes minimus|CCDB24229-B01|Sofia Wiedenbrug|BIN Taxonomy Match|BOLD:AAA8204  
Limnophyes minimus|BIOUG16552-A12|Kate Perez|BIN Taxonomy Match|BOLD:AAA8204  
Limnophyes minimus|BIOUG16596-F01|Kate Perez|BIN Taxonomy Match|BOLD:AAA8204  
Limnophyes minimus|BIOUG16597-E11|Kate Perez|BIN Taxonomy Match|BOLD:AAA8204  
Limnophyes minimus|BIOUG05141-D10|Kate Perez|BIN Taxonomy Match|BOLD:AAA8204  
Limnophyes minimus|BIOUG04212-D05|Kate Perez|BIN Taxonomy Match|BOLD:AAA8204  
Limnophyes minimus|BIOUG04366-G01|Kate Perez|BIN Taxonomy Match|BOLD:AAA8204  
Limnophyes minimus|BIOUG04153-G06|Kate Perez|BIN Taxonomy Match|BOLD:AAA8204  
Limnophyes minimus|BIOUG04155-E04|Kate Perez|BIN Taxonomy Match|BOLD:AAA8204  
Limnophyes minimus|BIOUG15853-C01|Kate Perez|BIN Taxonomy Match|BOLD:AAA8204  
Limnophyes minimus|BIOUG04153-D03|Kate Perez|BIN Taxonomy Match|BOLD:AAA8204  
Limnophyes minimus|ZMUG.024265|Lauri Paasivirta|BOLD:AAA8204  
Limnophyes minimus|BIOUG08260-D12|Kate Perez|BIN Taxonomy Match|BOLD:AAA8204  
Limnophyes minimus|BIOUG15458-D05|Kate Perez|BIN Taxonomy Match|BOLD:AAA8204  
Limnophyes minimus|BIOUG16597-F03|Kate Perez|BIN Taxonomy Match|BOLD:AAA8204  
Limnophyes minimus|BIOUG15720-C11|Kate Perez|BIN Taxonomy Match|BOLD:AAA8204  
Limnophyes minimus|BIOUG15795-A02|Kate Perez|BIN Taxonomy Match|BOLD:AAA8204  
Limnophyes minimus|BIOUG15795-D11|Kate Perez|BIN Taxonomy Match|BOLD:AAA8204  
Limnophyes minimus|BIOUG15796-B06|Kate Perez|BIN Taxonomy Match|BOLD:AAA8204  
Limnophyes minimus|BIOUG16596-E10|Kate Perez|BIN Taxonomy Match|BOLD:AAA8204  
Limnophyes minimus|BIOUG16597-E06|Kate Perez|BIN Taxonomy Match|BOLD:AAA8204  
Limnophyes minimus|BIOUG17066-D10|Kate Perez|BIN Taxonomy Match|BOLD:AAA8204  
Limnophyes minimus|BIOUG15763-B12|Kate Perez|BIN Taxonomy Match|BOLD:AAA8204  
Limnophyes minimus|BIOUG15763-C06|Kate Perez|BIN Taxonomy Match|BOLD:AAA8204  
Limnophyes minimus|BIOUG15763-D07|Kate Perez|BIN Taxonomy Match|BOLD:AAA8204  
Limnophyes minimus|BIOUG08316-D05|Kate Perez|BIN Taxonomy Match|BOLD:AAA8204  
Limnophyes minimus|BIOUG15718-H06|Kate Perez|BIN Taxonomy Match|BOLD:AAA8204  
Limnophyes minimus|BIOUG15720-G10|Kate Perez|BIN Taxonomy Match|BOLD:AAA8204  
Limnophyes minimus|BIOUG15762-F05|Kate Perez|BIN Taxonomy Match|BOLD:AAA8204  
Limnophyes minimus|BIOUG15765-B09|Kate Perez|BIN Taxonomy Match|BOLD:AAA8204  
Limnophyes minimus|BIOUG15766-G07|Kate Perez|BIN Taxonomy Match|BOLD:AAA8204  
Limnophyes minimus|BIOUG08098-F10|Kate Perez|BIN Taxonomy Match|BOLD:AAA8204  
Limnophyes minimus|BIOUG15541-G02|Kate Perez|BIN Taxonomy Match|BOLD:AAA8204  
Limnophyes minimus|BIOUG05778-C05|Kate Perez|BIN Taxonomy Match|BOLD:AAA8204  
Limnophyes minimus|BIOUG15540-G12|Kate Perez|BIN Taxonomy Match|BOLD:AAA8204  
Limnophyes minimus|BIOUG15465-A12|Kate Perez|BIN Taxonomy Match|BOLD:AAA8204  
Limnophyes minimus|BIOUG08132-G06|Kate Perez|BIN Taxonomy Match|BOLD:AAA8204  
Limnophyes minimus|BIOUG08134-E05|Kate Perez|BIN Taxonomy Match|BOLD:AAA8204  
Limnophyes minimus|BIOUG15795-B11|Kate Perez|BIN Taxonomy Match|BOLD:AAA8204  
Limnophyes minimus|BIOUG15796-F04|Kate Perez|BIN Taxonomy Match|BOLD:AAA8204  
Limnophyes minimus|BIOUG15797-C11|Kate Perez|BIN Taxonomy Match|BOLD:AAA8204  
Limnophyes minimus|BIOUG16596-G09|Kate Perez|BIN Taxonomy Match|BOLD:AAA8204  
Limnophyes minimus|BIOUG07928-H01|Kate Perez|BIN Taxonomy Match|BOLD:AAA8204  
Limnophyes minimus|BIOUG15766-G08|Kate Perez|BIN Taxonomy Match|BOLD:AAA8204  
Limnophyes minimus|BIOUG16598-B03|Kate Perez|BIN Taxonomy Match|BOLD:AAA8204  
Limnophyes minimus|BIOUG07566-A02|Kate Perez|BIN Taxonomy Match|BOLD:AAA8204  
Limnophyes minimus|BIOUG07566-B09|Kate Perez|BIN Taxonomy Match|BOLD:AAA8204  
Limnophyes minimus|BIOUG07563-B08|Kate Perez|BIN Taxonomy Match|BOLD:AAA8204  
Limnophyes minimus|BIOUG07760-B10|Kate Perez|BIN Taxonomy Match|BOLD:AAA8204  
Limnophyes minimus|BIOUG15653-B12|Kate Perez|BIN Taxonomy Match|BOLD:AAA8204  
Limnophyes minimus|BIOUG07410-E01|Kate Perez|BIN Taxonomy Match|BOLD:AAA8204  
Limnophyes minimus|BIOUG16426-G05|Kate Perez|BIN Taxonomy Match|BOLD:AAA8204  
Limnophyes minimus|BIOUG16433-H05|Kate Perez|BIN Taxonomy Match|BOLD:AAA8204  
Limnophyes minimus|BIOUG16434-A05|Kate Perez|BIN Taxonomy Match|BOLD:AAA8204  
Limnophyes minimus|BIOUG16435-E05|Kate Perez|BIN Taxonomy Match|BOLD:AAA8204  
Limnophyes minimus|BIOUG16431-G12|Kate Perez|BIN Taxonomy Match|BOLD:AAA8204  
Limnophyes minimus|BIOUG16432-G06|Kate Perez|BIN Taxonomy Match|BOLD:AAA8204  
Limnophyes minimus|BIOUG16432-H10|Kate Perez|BIN Taxonomy Match|BOLD:AAA8204  
Limnophyes minimus|BIOUG16477-F02|Kate Perez|BIN Taxonomy Match|BOLD:AAA8204  
Limnophyes minimus|BIOUG16708-H11|Kate Perez|BIN Taxonomy Match|BOLD:AAA8204  
Limnophyes minimus|BIOUG16626-A04|Kate Perez|BIN Taxonomy Match|BOLD:AAA8204  
Limnophyes minimus|BIOUG16996-C08|Kate Perez|BIN Taxonomy Match|BOLD:AAA8204  
Limnophyes minimus|BIOUG06053-E08|Kate Perez|BIN Taxonomy Match|BOLD:AAA8204  
Limnophyes minimus|ZSM34343-F08|Sofia Wiedenbrug|Morphology|BOLD:AAA8204  
Limnophyes minimus|BIOUG15769-E08|Kate Perez|BIN Taxonomy Match|BOLD:AAA8204  
Limnophyes minimus|BIOUG15947-E02|Kate Perez|BIN Taxonomy Match|BOLD:AAA8204  
Limnophyes minimus|BIOUG08127-F12|Kate Perez|BIN Taxonomy Match|BOLD:AAA8204  
Limnophyes minimus|BIOUG15966-B10|Kate Perez|BIN Taxonomy Match|BOLD:AAA8204  
Limnophyes minimus|BIOUG08125-C08|Kate Perez|BIN Taxonomy Match|BOLD:AAA8204  
Limnophyes minimus|BIOUG06443-G11|Kate Perez|BIN Taxonomy Match|BOLD:AAA8204  
Limnophyes minimus|BIOUG16436-A07|Kate Perez|BIN Taxonomy Match|BOLD:AAA8204  
Limnophyes minimus|BIOUG15651-A08|Kate Perez|BIN Taxonomy Match|BOLD:AAA8204  
Limnophyes minimus|BIOUG43081-E10|Kate Perez|BIN Taxonomy Match below Phylum (Jun 2019)|BOL...  
Limnophyes minimus|BIOUG07757-G11|Kate Perez|BIN Taxonomy Match|BOLD:AAA8204  
Limnophyes minimus|ZSM-DIP-33137-F02|Caroline Chimento|BIN Taxonomy Match (Jan 2022)|BOLD ...  
Limnophyes minimus|BIOUG07757-B03|Kate Perez|BIN Taxonomy Match|BOLD:AAA8204  
Limnophyes minimus|BIOUG07504-C02|Kate Perez|BIN Taxonomy Match|BOLD:AAA8204  
Limnophyes minimus|BIOUG04089-A08|Kate Perez|BIN Taxonomy Match|BOLD:AAA8204





Limnophyes minimus|ZSM-DIP-33135-F09|Caroline Chimento|BIN Taxonomy Match (Jan 2022)|BOLD ...  
Limnophyes minimus|BIOUG42965-G02|Kate Perez|BIN Taxonomy Match below Phylum (Jun 2019)|BOL...  
Limnophyes minimus|ZSM34343-F12|Sofia Wiedenbrug|Morphology|BOLD:AAA8204  
Limnophyes minimus|BIOUG15764-H09|Kate Perez|BIN Taxonomy Match|BOLD:AAA8204  
Limnophyes minimus|BIOUG07509-E05|Kate Perez|BIN Taxonomy Match|BOLD:AAA8204  
Limnophyes minimus|BIOUG07410-C04|Kate Perez|BIN Taxonomy Match|BOLD:AAA8204  
Limnophyes minimus|BIOUG05486-F10|Kate Perez|BIN Taxonomy Match|BOLD:AAA8204  
Limnophyes minimus|BIOUG07414-E11|Kate Perez|BIN Taxonomy Match|BOLD:AAA8204  
Limnophyes minimus|BIOUG04437-E01|Kate Perez|BIN Taxonomy Match|BOLD:AAA8204  
Limnophyes minimus|BIOUG36684-H11|Kate Perez|BIN Taxonomy Match (May 2018)|BOLD:AAA8204  
Limnophyes minimus|BIOUG07808-H06|Kate Perez|BIN Taxonomy Match|BOLD:AAA8204  
Limnophyes minimus|BIOUG15764-E09|Kate Perez|BIN Taxonomy Match|BOLD:AAA8204  
Limnophyes minimus|BIOUG16398-B12|Kate Perez|BIN Taxonomy Match|BOLD:AAA8204  
Limnophyes minimus|BIOUG15536-A06|Kate Perez|BIN Taxonomy Match|BOLD:AAA8204  
Limnophyes minimus|BIOUG07405-F09|Kate Perez|BIN Taxonomy Match|BOLD:AAA8204  
Limnophyes minimus|BIOUG07809-A11|Kate Perez|BIN Taxonomy Match|BOLD:AAA8204  
Limnophyes minimus|BIOUG15766-H02|Kate Perez|BIN Taxonomy Match|BOLD:AAA8204  
Limnophyes minimus|BIOUG08095-A02|Kate Perez|BIN Taxonomy Match|BOLD:AAA8204  
Limnophyes minimus|BIOUG05777-D06|Kate Perez|BIN Taxonomy Match|BOLD:AAA8204  
Limnophyes minimus|BIOUG07568-D01|Kate Perez|BIN Taxonomy Match|BOLD:AAA8204  
Limnophyes minimus|BIOUG07410-B08|Kate Perez|BIN Taxonomy Match|BOLD:AAA8204  
Limnophyes minimus|BIOUG16625-A02|Kate Perez|BIN Taxonomy Match|BOLD:AAA8204  
Limnophyes minimus|BIOUG15718-C10|Kate Perez|BIN Taxonomy Match|BOLD:AAA8204  
Limnophyes minimus|BIOUG15539-E11|Kate Perez|BIN Taxonomy Match|BOLD:AAA8204  
Limnophyes minimus|BIOUG05900-C08|Kate Perez|BIN Taxonomy Match|BOLD:AAA8204  
Limnophyes minimus|BIOUG05485-E07|Kate Perez|BIN Taxonomy Match|BOLD:AAA8204  
Limnophyes minimus|BIOUG06065-F12|Kate Perez|BIN Taxonomy Match|BOLD:AAA8204  
Limnophyes minimus|BIOUG05395-A07|Kate Perez|BIN Taxonomy Match|BOLD:AAA8204  
Limnophyes minimus|BIOUG04433-C06|Kate Perez|BIN Taxonomy Match|BOLD:AAA8204  
Limnophyes minimus|BIOUG05217-C06|Kate Perez|BIN Taxonomy Match|BOLD:AAA8204  
Limnophyes minimus|BIOUG04437-E03|Kate Perez|BIN Taxonomy Match|BOLD:AAA8204  
Limnophyes minimus|BIOUG15766-E08|Kate Perez|BIN Taxonomy Match|BOLD:AAA8204  
Limnophyes minimus|BIOUG15769-C04|Kate Perez|BIN Taxonomy Match|BOLD:AAA8204  
Limnophyes minimus|BIOUG15769-D08|Kate Perez|BIN Taxonomy Match|BOLD:AAA8204  
Limnophyes minimus|BIOUG15537-G02|Kate Perez|BIN Taxonomy Match|BOLD:AAA8204  
Limnophyes minimus|BIOUG15795-D06|Kate Perez|BIN Taxonomy Match|BOLD:AAA8204  
Limnophyes minimus|BIOUG15795-H07|Kate Perez|BIN Taxonomy Match|BOLD:AAA8204  
Limnophyes minimus|BIOUG16596-F10|Kate Perez|BIN Taxonomy Match|BOLD:AAA8204  
Limnophyes minimus|BIOUG16596-H02|Kate Perez|BIN Taxonomy Match|BOLD:AAA8204  
Limnophyes minimus|BIOUG36987-G09|Kate Perez|BIN Taxonomy Match (Jul 2018)|BOLD:AAA8204  
Limnophyes minimus|BIOUG55189-F11|Stefan Schmidt|BIN Taxonomy Match (Sep 2020)|BOLD:AAA8204  
Limnophyes minimus|CH-OSF44|Elisabeth Stur|BOLD:AAA8204  
Limnophyes minimus|ZSM-DIP-33135-H11|Caroline Chimento|BIN Taxonomy Match (Jan 2022)|BOLD ...  
Limnophyes minimus|ZSM-DIP-33135-H10|Caroline Chimento|BIN Taxonomy Match (Jan 2022)|BOLD ...  
Limnophyes minimus|ZSM-DIP-33135-H09|Caroline Chimento|BIN Taxonomy Match (Jan 2022)|BOLD ...  
Limnophyes minimus|ZSM-DIP-33135-H08|Caroline Chimento|BIN Taxonomy Match (Jan 2022)|BOLD ...  
Limnophyes minimus|ZSM-DIP-33135-H05|Caroline Chimento|BIN Taxonomy Match (Jan 2022)|BOLD ...  
Limnophyes minimus|ZSM-DIP-33135-H04|Caroline Chimento|BIN Taxonomy Match (Jan 2022)|BOLD ...  
Limnophyes minimus|ZSM-DIP-33135-G12|Caroline Chimento|BIN Taxonomy Match (Jan 2022)|BOLD ...  
Limnophyes minimus|ZSM-DIP-33135-F10|Caroline Chimento|BIN Taxonomy Match (Jan 2022)|BOLD ...  
Limnophyes minimus|ZSM-DIP-33130-A11|Caroline Chimento|BIN Taxonomy Match (Jan 2022)|BOLD ...  
Limnophyes minimus|ZSM-DIP-33144-B04|Caroline Chimento|BIN Taxonomy Match (Jan 2022)|BOLD ...  
Limnophyes minimus|ZSM-DIP-33144-B03|Caroline Chimento|BIN Taxonomy Match (Jan 2022)|BOLD ...  
Limnophyes minimus|ZSM-DIP-33137-D09|Caroline Chimento|BIN Taxonomy Match (Jan 2022)|BOLD ...  
Limnophyes minimus|BIOUG42961-H06|Kate Perez|BIN Taxonomy Match below Phylum (Jun 2019)|BOL...  
Limnophyes minimus|BIOUG42961-F06|Kate Perez|BIN Taxonomy Match below Phylum (Jun 2019)|BOL...  
Limnophyes minimus|BIOUG42961-E06|Kate Perez|BIN Taxonomy Match below Phylum (Jun 2019)|BOL...  
Limnophyes minimus|BIOUG42961-D12|Kate Perez|BIN Taxonomy Match below Phylum (Jun 2019)|BOL...  
Limnophyes minimus|BIOUG07810-B07|Kate Perez|BIN Taxonomy Match|BOLD:AAA8204  
Limnophyes minimus|BIOUG15455-C10|Kate Perez|BIN Taxonomy Match|BOLD:AAA8204  
Limnophyes minimus|BIOUG15895-G05|Kate Perez|BIN Taxonomy Match|BOLD:AAA8204  
Limnophyes minimus|BIOUG15895-E08|Kate Perez|BIN Taxonomy Match|BOLD:AAA8204  
Limnophyes minimus|ZSM-DIP-33140-D12|Caroline Chimento|BIN Taxonomy Match (Jan 2022)|BOLD ...  
Limnophyes minimus|ZSM-DIP-33138-H09|Caroline Chimento|BIN Taxonomy Match (Jan 2022)|BOLD ...  
Limnophyes minimus|ZSM-DIP-33138-H03|Caroline Chimento|BIN Taxonomy Match (Jan 2022)|BOLD ...  
Limnophyes minimus|ZSM-DIP-33138-G07|Caroline Chimento|BIN Taxonomy Match (Jan 2022)|BOLD ...  
Limnophyes minimus|ZSM-DIP-33146-F04|Caroline Chimento|BIN Taxonomy Match (Jan 2022)|BOLD ...  
Limnophyes minimus|ZSM-DIP-33146-B11|Caroline Chimento|BIN Taxonomy Match (Jan 2022)|BOLD ...  
Limnophyes minimus|ZSM-DIP-33138-B03|Caroline Chimento|BIN Taxonomy Match (Jan 2022)|BOLD ...  
Limnophyes minimus|ZSM-DIP-33138-B02|Caroline Chimento|BIN Taxonomy Match (Jan 2022)|BOLD ...  
Limnophyes minimus|ZSM-DIP-33137-D07|Caroline Chimento|BIN Taxonomy Match (Jan 2022)|BOLD ...  
Limnophyes minimus|ZSM-DIP-33137-D06|Caroline Chimento|BIN Taxonomy Match (Jan 2022)|BOLD ...  
Limnophyes minimus|ZSM-DIP-33137-D04|Caroline Chimento|BIN Taxonomy Match (Jan 2022)|BOLD ...  
Limnophyes minimus|ZSM-DIP-33137-D02|Caroline Chimento|BIN Taxonomy Match (Jan 2022)|BOLD ...  
Limnophyes minimus|BIOUG36677-C06|Kate Perez|BIN Taxonomy Match (May 2018)|BOLD:AAA8204  
Limnophyes minimus|BIOUG07263-C12|Kate Perez|BIN Taxonomy Match|BOLD:AAA8204  
Limnophyes minimus|BIOUG04437-E04|Kate Perez|BIN Taxonomy Match|BOLD:AAA8204  
Limnophyes minimus|BIOUG05490-H03|Kate Perez|BIN Taxonomy Match|BOLD:AAA8204  
Limnophyes minimus|BIOUG16597-C02|Kate Perez|BIN Taxonomy Match|BOLD:AAA8204  
Limnophyes minimus|BIOUG16596-D05|Kate Perez|BIN Taxonomy Match|BOLD:AAA8204  
Limnophyes minimus|BIOUG15806-D02|Kate Perez|BIN Taxonomy Match|BOLD:AAA8204  
Limnophyes minimus|BIOUG15799-B12|Kate Perez|BIN Taxonomy Match|BOLD:AAA8204  
Limnophyes minimus|BIOUG07505-D09|Kate Perez|BIN Taxonomy Match|BOLD:AAA8204  
Limnophyes minimus|BIOUG04089-D09|Kate Perez|BIN Taxonomy Match|BOLD:AAA8204  
Limnophyes minimus|BIOUG54161-A04|Stefan Schmidt|BIN Taxonomy Match (Sep 2020)|BOLD:AAA8204  
Limnophyes minimus|BIOUG42966-D10|Kate Perez|BIN Taxonomy Match below Phylum (Jun 2019)|BOL...  
Limnophyes minimus|CH-eik05|Elisabeth Stur|BOLD:AAA8204  
Limnophyes minimus|Finmark07|Elisabeth Stur|BOLD:AAA8204  
Limnophyes minimus|ZSM-DIP-33132-E12|Caroline Chimento|BIN Taxonomy Match (Jan 2022)|BOLD ...  
Limnophyes minimus|ZSM-DIP-33132-D10|Caroline Chimento|BIN Taxonomy Match (Jan 2022)|BOLD ...  
Limnophyes minimus|BIOUG55147-F05|Stefan Schmidt|BIN Taxonomy Match (Sep 2020)|BOLD:AAA8204  
Limnophyes minimus|BIOUG42695-E12|Kate Perez|BIN Taxonomy Match below Phylum (Jun 2019)|BOL...  
Limnophyes minimus|BIOUG15565-D03|Kate Perez|BIN Taxonomy Match|BOLD:AAA8204  
Limnophyes minimus|BIOUG15465-A06|Kate Perez|BIN Taxonomy Match|BOLD:AAA8204  
Limnophyes minimus|BIOUG08318-E05|Kate Perez|BIN Taxonomy Match|BOLD:AAA8204  
Limnophyes minimus|BIOUG15766-D08|Kate Perez|BIN Taxonomy Match|BOLD:AAA8204  
Limnophyes minimus|BIOUG07755-B10|Kate Perez|BIN Taxonomy Match|BOLD:AAA8204  
Limnophyes minimus|BIOUG07753-D12|Kate Perez|BIN Taxonomy Match|BOLD:AAA8204  
Limnophyes minimus|BIOUG07753-D01|Kate Perez|BIN Taxonomy Match|BOLD:AAA8204  
Limnophyes minimus|BIOUG07753-A10|Kate Perez|BIN Taxonomy Match|BOLD:AAA8204  
Limnophyes minimus|BIOUG54164-B04|Stefan Schmidt|BIN Taxonomy Match (Sep 2020)|BOLD:AAA8204  
Limnophyes minimus|BIOUG42968-D08|Kate Perez|BIN Taxonomy Match below Phylum (Jun 2019)|BOL...  
Limnophyes minimus|DIPNO-0040|Kate Perez|BIN Taxonomy Match (Jun 2019)|BOLD:AAA8204

Limnophyes minimus|BIOUG54164-B04|Stefan Schmidt|BIN Taxonomy Match (Sep 2020)|BOLD:AAA8204  
Limnophyes minimus|BIOUG42968-D08|Kate Perez|BIN Taxonomy Match below Phylum (Jun 2019)|BOL...  
Limnophyes minimus|DIPNO-0040|Kate Perez|BIN Taxonomy Match (Jun 2019)|BOLD:AAA8204  
Limnophyes minimus|CH-eik113|Elisabeth Sturj|BOLD:AAA8204  
Limnophyes minimus|BIOUG07755-H04|Kate Perez|BIN Taxonomy Match|BOLD:AAA8204  
Limnophyes minimus|BIOUG07945-D10|Kate Perez|BIN Taxonomy Match|BOLD:AAA8204  
Limnophyes minimus|BIOUG08140-C10|Kate Perez|BIN Taxonomy Match|BOLD:AAA8204  
Limnophyes minimus|BIOUG07754-G08|Kate Perez|BIN Taxonomy Match|BOLD:AAA8204  
Limnophyes minimus|ZSM-DIP-33143-B11|Caroline Chimeno|BIN Taxonomy Match (Jan 2022)|BOLD ...  
Limnophyes minimus|ZSM-DIP-33143-A05|Caroline Chimeno|BIN Taxonomy Match (Jan 2022)|BOLD ...  
Limnophyes minimus|BIOUG16434-B10|Kate Perez|BIN Taxonomy Match|BOLD:AAA8204  
Limnophyes minimus|CH-OSF43|Elisabeth Sturj|BOLD:AAA8204  
Limnophyes minimus|BIOUG15600-F09|Kate Perez|BIN Taxonomy Match|BOLD:AAA8204  
Limnophyes minimus|BIOUG16436-D11|Kate Perez|BIN Taxonomy Match|BOLD:AAA8204  
Limnophyes minimus|RIN\_CH06|Elisabeth Sturj|morphology|BOLD:AAA8204  
Limnophyes minimus|CH-OSF152|Elisabeth Sturj|BOLD:AAA8204  
Limnophyes minimus|CH-OSF127|Elisabeth Sturj|BOLD:AAA8204  
Limnophyes minimus|CH-OSF126|Elisabeth Sturj|BOLD:AAA8204  
Limnophyes minimus|BIOUG15947-C08|Kate Perez|BIN Taxonomy Match|BOLD:AAA8204  
Limnophyes minimus|BIOUG15809-F02|Kate Perez|BIN Taxonomy Match|BOLD:AAA8204  
Limnophyes minimus|BIOUG15809-B05|Kate Perez|BIN Taxonomy Match|BOLD:AAA8204  
Limnophyes minimus|BIOUG15808-H02|Kate Perez|BIN Taxonomy Match|BOLD:AAA8204  
Limnophyes minimus|BIOUG16596-G10|Kate Perez|BIN Taxonomy Match|BOLD:AAA8204  
Limnophyes minimus|BIOUG15765-B06|Kate Perez|BIN Taxonomy Match|BOLD:AAA8204  
Limnophyes minimus|BIOUG15798-B12|Kate Perez|BIN Taxonomy Match|BOLD:AAA8204  
Limnophyes minimus|BIOUG15455-B09|Kate Perez|BIN Taxonomy Match|BOLD:AAA8204  
Limnophyes minimus|BIOUG16551-H05|Kate Perez|BIN Taxonomy Match|BOLD:AAA8204  
Limnophyes minimus|BIOUG15809-D06|Kate Perez|BIN Taxonomy Match|BOLD:AAA8204  
Limnophyes minimus|ZSM-DIP-33130-F05|Caroline Chimeno|BIN Taxonomy Match (Jan 2022)|BOLD ...  
Limnophyes minimus|ZSM-DIP-33130-D07|Caroline Chimeno|BIN Taxonomy Match (Jan 2022)|BOLD ...  
Limnophyes minimus|ZSM-DIP-33134-C06|Caroline Chimeno|BIN Taxonomy Match (Jan 2022)|BOLD ...  
Limnophyes minimus|ZSM-DIP-33134-B07|Caroline Chimeno|BIN Taxonomy Match (Jan 2022)|BOLD ...  
Limnophyes minimus|BIOUG15765-A10|Kate Perez|BIN Taxonomy Match|BOLD:AAA8204  
Limnophyes minimus|BIOUG15809-A12|Kate Perez|BIN Taxonomy Match|BOLD:AAA8204  
Limnophyes minimus|BIOUG15807-E05|Kate Perez|BIN Taxonomy Match|BOLD:AAA8204  
Limnophyes minimus|BIOUG15797-B11|Kate Perez|BIN Taxonomy Match|BOLD:AAA8204  
Limnophyes minimus|BIOUG36678-B12|Kate Perez|BIN Taxonomy Match (Jul 2018)|BOLD:AAA8204  
Limnophyes minimus|BIOUG36737-A04|Kate Perez|BIN Taxonomy Match (May 2018)|BOLD:AAA8204  
Limnophyes minimus|BIOUG42681-D04|Kate Perez|BIN Taxonomy Match below Phylum (Jun 2019)|BOL...  
Limnophyes minimus|BIOUG42681-B11|Kate Perez|BIN Taxonomy Match below Phylum (Jun 2019)|BOL...  
Limnophyes minimus|BIOUG43079-C06|Kate Perez|BIN Taxonomy Match below Phylum (Jun 2019)|BOL...  
Limnophyes minimus|BIOUG43079-B08|Kate Perez|BIN Taxonomy Match below Phylum (Jun 2019)|BOL...  
Limnophyes minimus|BIOUG15762-D03|Kate Perez|BIN Taxonomy Match|BOLD:AAA8204  
Limnophyes minimus|BIOUG15762-C06|Kate Perez|BIN Taxonomy Match|BOLD:AAA8204  
Limnophyes minimus|BIOUG07569-G03|Kate Perez|BIN Taxonomy Match|BOLD:AAA8204  
Limnophyes minimus|BIOUG15460-F10|Kate Perez|BIN Taxonomy Match|BOLD:AAA8204  
Limnophyes minimus|BIOUG07760-B11|Kate Perez|BIN Taxonomy Match|BOLD:AAA8204  
Limnophyes minimus|BIOUG07759-F06|Kate Perez|BIN Taxonomy Match|BOLD:AAA8204  
Limnophyes minimus|BIOUG07565-A10|Kate Perez|BIN Taxonomy Match|BOLD:AAA8204  
Limnophyes minimus|BIOUG08315-G08|Kate Perez|BIN Taxonomy Match|BOLD:AAA8204  
Limnophyes minimus|BIOUG07760-A08|Kate Perez|BIN Taxonomy Match|BOLD:AAA8204  
Limnophyes minimus|BIOUG07758-F11|Kate Perez|BIN Taxonomy Match|BOLD:AAA8204  
Limnophyes minimus|BIOUG16597-G09|Kate Perez|BIN Taxonomy Match|BOLD:AAA8204  
Limnophyes minimus|BIOUG16597-F09|Kate Perez|BIN Taxonomy Match|BOLD:AAA8204  
Limnophyes minimus|BIOUG08138-C03|Kate Perez|BIN Taxonomy Match|BOLD:AAA8204  
Limnophyes minimus|BIOUG08137-H02|Kate Perez|BIN Taxonomy Match|BOLD:AAA8204  
Limnophyes minimus|BIOUG15806-C10|Kate Perez|BIN Taxonomy Match|BOLD:AAA8204  
Limnophyes minimus|BIOUG15800-A02|Kate Perez|BIN Taxonomy Match|BOLD:AAA8204  
Limnophyes minimus|BIOUG15964-G03|Kate Perez|BIN Taxonomy Match|BOLD:AAA8204  
Limnophyes minimus|BIOUG15807-F02|Kate Perez|BIN Taxonomy Match|BOLD:AAA8204  
Limnophyes minimus|BIOUG06056-G09|Kate Perez|BIN Taxonomy Match|BOLD:AAA8204  
Limnophyes minimus|BIOUG06047-A07|Kate Perez|BIN Taxonomy Match|BOLD:AAA8204  
Limnophyes minimus|BIOUG16596-D04|Kate Perez|BIN Taxonomy Match|BOLD:AAA8204  
Limnophyes minimus|BIOUG16594-D09|Kate Perez|BIN Taxonomy Match|BOLD:AAA8204  
Limnophyes minimus|ZSM-DIP-33143-A04|Caroline Chimeno|BIN Taxonomy Match (Jan 2022)|BOLD ...  
Limnophyes minimus|ZSM-DIP-33143-A03|Caroline Chimeno|BIN Taxonomy Match (Jan 2022)|BOLD ...  
Limnophyes minimus|BIOUG42788-E03|Kate Perez|BIN Taxonomy Match below Phylum (Jun 2019)|BOL...  
Limnophyes minimus|ZSM-DIP-33142-F02|Caroline Chimeno|BIN Taxonomy Match (Jan 2022)|BOLD ...  
Limnophyes minimus|ZSM-DIP-33142-D04|Caroline Chimeno|BIN Taxonomy Match (Jan 2022)|BOLD ...  
Limnophyes minimus|ZSM-DIP-33142-C10|Caroline Chimeno|BIN Taxonomy Match (Jan 2022)|BOLD ...  
Limnophyes minimus|ZSM-DIP-33142-C08|Caroline Chimeno|BIN Taxonomy Match (Jan 2022)|BOLD ...  
Limnophyes minimus|ZSM-DIP-33142-B04|Caroline Chimeno|BIN Taxonomy Match (Jan 2022)|BOLD ...  
Limnophyes minimus|ZSM-DIP-33134-D10|Caroline Chimeno|BIN Taxonomy Match (Jan 2022)|BOLD ...  
Limnophyes minimus|ZSM-DIP-33134-D03|Caroline Chimeno|BIN Taxonomy Match (Jan 2022)|BOLD ...  
Limnophyes minimus|ZSM-DIP-33132-D06|Caroline Chimeno|BIN Taxonomy Match (Jan 2022)|BOLD ...  
Limnophyes minimus|ZSM-DIP-33132-C09|Caroline Chimeno|BIN Taxonomy Match (Jan 2022)|BOLD ...  
Limnophyes minimus|BIOUG16596-D08|Kate Perez|BIN Taxonomy Match|BOLD:AAA8204  
Limnophyes minimus|BIOUG16594-E08|Kate Perez|BIN Taxonomy Match|BOLD:AAA8204  
Limnophyes minimus|ZSM-DIP-33135-F07|Caroline Chimeno|BIN Taxonomy Match (Jan 2022)|BOLD ...  
Limnophyes minimus|ZSM-DIP-33135-F05|Caroline Chimeno|BIN Taxonomy Match (Jan 2022)|BOLD ...  
Limnophyes minimus|ZSM-DIP-33143-H01|Caroline Chimeno|BIN Taxonomy Match (Jan 2022)|BOLD ...  
Limnophyes minimus|ZSM-DIP-33143-G10|Caroline Chimeno|BIN Taxonomy Match (Jan 2022)|BOLD ...  
Limnophyes minimus|BIOUG16626-D03|Kate Perez|BIN Taxonomy Match|BOLD:AAA8204  
Limnophyes minimus|BIOUG36846-E04|Kate Perez|BIN Taxonomy Match (Jul 2018)|BOLD:AAA8204  
Limnophyes minimus|ZSM-DIP-33132-A05|Caroline Chimeno|BIN Taxonomy Match (Jan 2022)|BOLD ...  
Limnophyes minimus|ZSM-DIP-33131-H11|Caroline Chimeno|BIN Taxonomy Match (Jan 2022)|BOLD ...  
Limnophyes minimus|BIOUG55425-B06|Stefan Schmidt|BIN Taxonomy Match (Sep 2020)|BOLD:AAA8204  
Limnophyes minimus|BIOUG43080-H10|Kate Perez|BIN Taxonomy Match below Phylum (Jun 2019)|BOL...  
Limnophyes minimus|BIOUG07756-C05|Kate Perez|BIN Taxonomy Match|BOLD:AAA8204  
Limnophyes minimus|BIOUG07755-F12|Kate Perez|BIN Taxonomy Match|BOLD:AAA8204  
Limnophyes minimus|BIOUG15765-D04|Kate Perez|BIN Taxonomy Match|BOLD:AAA8204  
Limnophyes minimus|BIOUG15765-C07|Kate Perez|BIN Taxonomy Match|BOLD:AAA8204  
Limnophyes minimus|BIOUG15765-A11|Kate Perez|BIN Taxonomy Match|BOLD:AAA8204  
Limnophyes minimus|BIOUG15765-A09|Kate Perez|BIN Taxonomy Match|BOLD:AAA8204  
Limnophyes minimus|ZSM-DIP-33144-E03|Caroline Chimeno|BIN Taxonomy Match (Jan 2022)|BOLD ...  
Limnophyes minimus|ZSM-DIP-33141-A02|Caroline Chimeno|BIN Taxonomy Match (Jan 2022)|BOLD ...  
Limnophyes minimus|ZSM-DIP-33141-A01|Caroline Chimeno|BIN Taxonomy Match (Jan 2022)|BOLD ...  
Limnophyes minimus|ZSM-DIP-33140-E01|Caroline Chimeno|BIN Taxonomy Match (Jan 2022)|BOLD ...  
Limnophyes minimus|BIOUG15762-G11|Kate Perez|BIN Taxonomy Match|BOLD:AAA8204  
Limnophyes minimus|BIOUG15762-F08|Kate Perez|BIN Taxonomy Match|BOLD:AAA8204  
Limnophyes minimus|BIOUG15465-H09|Kate Perez|BIN Taxonomy Match|BOLD:AAA8204  
Limnophyes minimus|BIOUG15465-B03|Kate Perez|BIN Taxonomy Match|BOLD:AAA8204  
Limnophyes minimus|BIOUG15765-C03|Kate Perez|BIN Taxonomy Match|BOLD:AAA8204





Limnophyes minimus|BIOUG1705-BU7|Kate Perez|BIN Taxonomy Match|BOLD:AAA8204  
Limnophyes minimus|ZSM-DIP-33141-D04|Caroline Chimeno|BIN Taxonomy Match (Jan 2022)|BOLD ...  
Limnophyes minimus|ZSM-DIP-33141-C07|Caroline Chimeno|BIN Taxonomy Match (Jan 2022)|BOLD ...  
Limnophyes minimus|ZSM-DIP-33141-B10|Caroline Chimeno|BIN Taxonomy Match (Jan 2022)|BOLD ...  
Limnophyes minimus|ZSM-DIP-33131-G11|Caroline Chimeno|BIN Taxonomy Match (Jan 2022)|BOLD ...  
Limnophyes minimus|BIOUG42670-E08|Kate Perez|BIN Taxonomy Match below Phylum (Jun 2019)|BOL...  
Limnophyes minimus|BIOUG55199-D12|Stefan Schmidt|BIN Taxonomy Match (Sep 2020)|BOLD:AAA8204  
Limnophyes minimus|BIOUG42741-B12|Kate Perez|BIN Taxonomy Match below Phylum (Jun 2019)|BOL...  
Limnophyes minimus|BIOUG42667-D01|Kate Perez|BIN Taxonomy Match below Phylum (Jun 2019)|BOL...  
Limnophyes minimus|BIOUG15763-B04|Kate Perez|BIN Taxonomy Match|BOLD:AAA8204  
Limnophyes minimus|BIOUG07759-E07|Kate Perez|BIN Taxonomy Match|BOLD:AAA8204  
Limnophyes minimus|CCDB24183-E01|Sofia Wiedenbrug|BIN-taxonomy|BOLD:AAA8204  
Limnophyes minimus|BIOUG15456-D09|Kate Perez|BIN Taxonomy Match|BOLD:AAA8204  
Limnophyes minimus|BIOUG15762-C03|Kate Perez|BIN Taxonomy Match|BOLD:AAA8204  
Limnophyes minimus|BIOUG15761-H09|Kate Perez|BIN Taxonomy Match|BOLD:AAA8204  
Limnophyes minimus|BIOUG15720-D08|Kate Perez|BIN Taxonomy Match|BOLD:AAA8204  
Limnophyes minimus|BIOUG15720-C02|Kate Perez|BIN Taxonomy Match|BOLD:AAA8204  
Limnophyes minimus|ZSM-DIP-33136-E10|Caroline Chimeno|BIN Taxonomy Match (Jan 2022)|BOLD ...  
Limnophyes minimus|ZSM-DIP-33136-C09|Caroline Chimeno|BIN Taxonomy Match (Jan 2022)|BOLD ...  
Limnophyes minimus|ZSM-DIP-33136-C08|Caroline Chimeno|BIN Taxonomy Match (Jan 2022)|BOLD ...  
Limnophyes minimus|ZSM-DIP-33136-B02|Caroline Chimeno|BIN Taxonomy Match (Jan 2022)|BOLD ...  
Limnophyes minimus|ZSM-DIP-33172-F10|Caroline Chimeno|BIN Taxonomy Match (Jan 2022)|BOLD ...  
Limnophyes minimus|ZSM-DIP-33144-G08|Caroline Chimeno|BIN Taxonomy Match (Jan 2022)|BOLD ...  
Limnophyes minimus|ZSM-DIP-33136-B01|Caroline Chimeno|BIN Taxonomy Match (Jan 2022)|BOLD ...  
Limnophyes minimus|ZSM-DIP-33136-A12|Caroline Chimeno|BIN Taxonomy Match (Jan 2022)|BOLD ...  
Limnophyes minimus|ZSM-DIP-33172-H08|Caroline Chimeno|BIN Taxonomy Match (Jan 2022)|BOLD ...  
Limnophyes minimus|ZSM-DIP-33172-H05|Caroline Chimeno|BIN Taxonomy Match (Jan 2022)|BOLD ...  
Limnophyes minimus|ZSM-DIP-33136-F08|Caroline Chimeno|BIN Taxonomy Match (Jan 2022)|BOLD ...  
Limnophyes minimus|ZSM-DIP-33136-F06|Caroline Chimeno|BIN Taxonomy Match (Jan 2022)|BOLD ...  
Limnophyes minimus|CH-eik9|Elisabeth Stur|BOLD:AAA8204  
Limnophyes minimus|Finmark393|Elisabeth Stur|BOLD:AAA8204  
Limnophyes minimus|ZSM-DIP-33145-H01|Caroline Chimeno|BIN Taxonomy Match (Jan 2022)|BOLD ...  
Limnophyes minimus|ZSM-DIP-33145-E03|Caroline Chimeno|BIN Taxonomy Match (Jan 2022)|BOLD ...  
Limnophyes minimus|ZSM-DIP-33144-G07|Caroline Chimeno|BIN Taxonomy Match (Jan 2022)|BOLD ...  
Limnophyes minimus|ZSM-DIP-33144-G06|Caroline Chimeno|BIN Taxonomy Match (Jan 2022)|BOLD ...  
Limnophyes minimus|ZSM-DIP-33147-B11|Caroline Chimeno|BIN Taxonomy Match (Jan 2022)|BOLD ...  
Limnophyes minimus|ZSM-DIP-33147-A02|Caroline Chimeno|BIN Taxonomy Match (Jan 2022)|BOLD ...  
Limnophyes minimus|ZSM-DIP-33137-F10|Caroline Chimeno|BIN Taxonomy Match (Jan 2022)|BOLD ...  
Limnophyes minimus|ZSM-DIP-33137-F09|Caroline Chimeno|BIN Taxonomy Match (Jan 2022)|BOLD ...  
Limnophyes minimus|ZSM-DIP-33148-C08|Caroline Chimeno|BIN Taxonomy Match (Jan 2022)|BOLD ...  
Limnophyes minimus|ZSM-DIP-33137-F11|Caroline Chimeno|BIN Taxonomy Match (Jan 2022)|BOLD ...  
Limnophyes minimus|ZSM-DIP-33138-A09|Caroline Chimeno|BIN Taxonomy Match (Jan 2022)|BOLD ...  
Limnophyes minimus|ZSM-DIP-33148-C09|Caroline Chimeno|BIN Taxonomy Match (Jan 2022)|BOLD ...  
Limnophyes minimus|ZSM-DIP-33138-A12|Caroline Chimeno|BIN Taxonomy Match (Jan 2022)|BOLD ...  
Limnophyes minimus|ZSM-DIP-33138-A11|Caroline Chimeno|BIN Taxonomy Match (Jan 2022)|BOLD ...  
Limnophyes minimus|BIOUG06052-E06|Kate Perez|BIN Taxonomy Match|BOLD:AAA8204  
Limnophyes minimus|BIOUG06052-C03|Kate Perez|BIN Taxonomy Match|BOLD:AAA8204  
Limnophyes minimus|BIOUG15464-B08|Kate Perez|BIN Taxonomy Match|BOLD:AAA8204  
Limnophyes minimus|BIOUG06052-G01|Kate Perez|BIN Taxonomy Match|BOLD:AAA8204  
Limnophyes minimus|BIOUG05900-C06|Kate Perez|BIN Taxonomy Match|BOLD:AAA8204  
Limnophyes minimus|BIOUG15464-H02|Kate Perez|BIN Taxonomy Match|BOLD:AAA8204  
Limnophyes minimus|BIOUG04366-H10|Kate Perez|BIN Taxonomy Match|BOLD:AAA8204  
Limnophyes minimus|BIOUG05485-B08|Kate Perez|BIN Taxonomy Match|BOLD:AAA8204  
Limnophyes minimus|BIOUG06051-B02|Kate Perez|BIN Taxonomy Match|BOLD:AAA8204  
Limnophyes minimus|BIOUG05149-H10|Kate Perez|BIN Taxonomy Match|BOLD:AAA8204  
Limnophyes minimus|BIOUG05900-E06|Kate Perez|BIN Taxonomy Match|BOLD:AAA8204  
Limnophyes minimus|BIOUG05900-D07|Kate Perez|BIN Taxonomy Match|BOLD:AAA8204  
Limnophyes minimus|BIOUG06052-F08|Kate Perez|BIN Taxonomy Match|BOLD:AAA8204  
Limnophyes minimus|BIOUG05141-H09|Kate Perez|BIN Taxonomy Match|BOLD:AAA8204  
Limnophyes minimus|BIOUG05149-F06|Kate Perez|BIN Taxonomy Match|BOLD:AAA8204  
Limnophyes minimus|BIOUG04155-H02|Kate Perez|BIN Taxonomy Match|BOLD:AAA8204  
Limnophyes minimus|BIOUG06051-H04|Kate Perez|BIN Taxonomy Match|BOLD:AAA8204  
Limnophyes minimus|BIOUG06051-E06|Kate Perez|BIN Taxonomy Match|BOLD:AAA8204  
Limnophyes minimus|BIOUG04433-H01|Kate Perez|BIN Taxonomy Match|BOLD:AAA8204  
Limnophyes minimus|BIOUG06052-A01|Kate Perez|BIN Taxonomy Match|BOLD:AAA8204  
Limnophyes minimus|BIOUG06210-B11|Kate Perez|BIN Taxonomy Match|BOLD:AAA8204  
Limnophyes minimus|BIOUG06210-A07|Kate Perez|BIN Taxonomy Match|BOLD:AAA8204  
Limnophyes minimus|BIOUG05780-E11|Kate Perez|BIN Taxonomy Match|BOLD:AAA8204  
Limnophyes minimus|BIOUG16712-C05|Kate Perez|BIN Taxonomy Match|BOLD:AAA8204  
Limnophyes minimus|BIOUG06055-A06|Kate Perez|BIN Taxonomy Match|BOLD:AAA8204  
Limnophyes minimus|BIOUG15463-E01|Kate Perez|BIN Taxonomy Match|BOLD:AAA8204  
Limnophyes minimus|BIOUG05141-B12|Kate Perez|BIN Taxonomy Match|BOLD:AAA8204  
Limnophyes minimus|BIOUG15593-D10|Kate Perez|BIN Taxonomy Match|BOLD:AAA8204  
Limnophyes minimus|BIOUG08319-G11|Kate Perez|BIN Taxonomy Match|BOLD:AAA8204  
Limnophyes minimus|CCDB24183-G06|Sofia Wiedenbrug|Morphology|BOLD:AAA8204  
Limnophyes minimus|BIOUG16480-C12|Kate Perez|BIN Taxonomy Match|BOLD:AAA8204  
Limnophyes minimus|BIOUG15764-H02|Kate Perez|BIN Taxonomy Match|BOLD:AAA8204  
Limnophyes minimus|BIOUG15766-E07|Kate Perez|BIN Taxonomy Match|BOLD:AAA8204  
Limnophyes minimus|BIOUG15544-A04|Kate Perez|BIN Taxonomy Match|BOLD:AAA8204  
Limnophyes minimus|BIOUG06050-G09|Kate Perez|BIN Taxonomy Match|BOLD:AAA8204  
Limnophyes minimus|BIOUG05595-D12|Kate Perez|BIN Taxonomy Match|BOLD:AAA8204  
Limnophyes minimus|BIOUG16476-C02|Kate Perez|BIN Taxonomy Match|BOLD:AAA8204  
Limnophyes minimus|BIOUG16710-G04|Kate Perez|BIN Taxonomy Match|BOLD:AAA8204  
Limnophyes minimus|BIOUG04155-H01|Kate Perez|BIN Taxonomy Match|BOLD:AAA8204  
Limnophyes minimus|BIOUG16551-F02|Kate Perez|BIN Taxonomy Match|BOLD:AAA8204  
Limnophyes minimus|BIOUG16432-F07|Kate Perez|BIN Taxonomy Match|BOLD:AAA8204  
Limnophyes minimus|BIOUG15793-E05|Kate Perez|BIN Taxonomy Match|BOLD:AAA8204  
Limnophyes minimus|BIOUG04795-C05|Kate Perez|BIN Taxonomy Match|BOLD:AAA8204  
Limnophyes minimus|BIOUG05944-A11|Kate Perez|BIN Taxonomy Match|BOLD:AAA8204  
Limnophyes minimus|BIOUG36736-E07|Kate Perez|BIN Taxonomy Match (May 2018)|BOLD:AAA8204  
Limnophyes minimus|BIOUG06052-D11|Kate Perez|BIN Taxonomy Match|BOLD:AAA8204  
Limnophyes minimus|BIOUG07505-D11|Kate Perez|BIN Taxonomy Match|BOLD:AAA8204  
Limnophyes minimus|BIOUG06056-D09|Kate Perez|BIN Taxonomy Match|BOLD:AAA8204  
Limnophyes minimus|BIOUG04437-G03|Kate Perez|BIN Taxonomy Match|BOLD:AAA8204  
Limnophyes minimus|BIOUG05946-B05|Kate Perez|BIN Taxonomy Match|BOLD:AAA8204  
Limnophyes minimus|BIOUG55190-E11|Stefan Schmidt|BIN Taxonomy Match (Sep 2020)|BOLD:AAA8204  
Limnophyes minimus|BIOUG36841-D06|Kate Perez|BIN Taxonomy Match (Jul 2018)|BOLD:AAA8204  
Limnophyes minimus|BIOUG04437-D08|Kate Perez|BIN Taxonomy Match|BOLD:AAA8204  
Limnophyes minimus|BIOUG04212-D06|Kate Perez|BIN Taxonomy Match|BOLD:AAA8204  
Limnophyes minimus|BIOUG05900-E10|Kate Perez|BIN Taxonomy Match|BOLD:AAA8204  
Limnophyes minimus|BIOUG06055-A10|Kate Perez|BIN Taxonomy Match|BOLD:AAA8204  
Limnophyes minimus|BIOUG05399-D04|Kate Perez|BIN Taxonomy Match|BOLD:AAA8204  
Limnophyes minimus|ZSM34343-G05|Sofia Wiedenbrug|Morphology|BOLD:AAA8204



Limnophyes minimus|BIOUG06055-A10|Kate Perez|BIN Taxonomy Match|BOLD:AAA8204  
Limnophyes minimus|BIOUG05399-D04|Kate Perez|BIN Taxonomy Match|BOLD:AAA8204  
Limnophyes minimus|ZSM34343-G05|Sofia Wiedenbrug|Morphology|BOLD:AAA8204  
Limnophyes minimus|BIOUG15458-A12|Kate Perez|BIN Taxonomy Match|BOLD:AAA8204  
Limnophyes minimus|BIOUG04296-C04|Kate Perez|BIN Taxonomy Match|BOLD:AAA8204  
Limnophyes minimus|BIOUG15458-D06|Kate Perez|BIN Taxonomy Match|BOLD:AAA8204  
Limnophyes minimus|BIOUG15538-C05|Kate Perez|BIN Taxonomy Match|BOLD:AAA8204  
Limnophyes minimus|BIOUG06210-F08|Kate Perez|BIN Taxonomy Match|BOLD:AAA8204  
Limnophyes minimus|BIOUG05946-A10|Kate Perez|BIN Taxonomy Match|BOLD:AAA8204  
Limnophyes minimus|CCDB22605-E12|Sofia Wiedenbrug|BOLD:AAA8204  
Limnophyes minimus|BIOUG05144-H04|Kate Perez|BIN Taxonomy Match|BOLD:AAA8204  
Limnophyes minimus|BIOUG04296-E06|Kate Perez|BIN Taxonomy Match|BOLD:AAA8204  
Limnophyes minimus|BIOUG04089-A07|Kate Perez|BIN Taxonomy Match|BOLD:AAA8204  
Limnophyes minimus|BIOUG08131-C12|Kate Perez|BIN Taxonomy Match|BOLD:AAA8204  
Limnophyes minimus|BIOUG04296-E11|Kate Perez|BIN Taxonomy Match|BOLD:AAA8204  
Limnophyes minimus|BIOUG15852-C07|Kate Perez|BIN Taxonomy Match|BOLD:AAA8204  
Limnophyes minimus|BIOUG16433-E02|Kate Perez|BIN Taxonomy Match|BOLD:AAA8204  
Limnophyes minimus|BIOUG06095-D03|Kate Perez|BIN Taxonomy Match|BOLD:AAA8204  
Limnophyes minimus|ZSM-DIP-33131-F07|Caroline Chimento|BIN Taxonomy Match (Jan 2022)|BOLD ...  
Limnophyes minimus|BIOUG05105-E03|Kate Perez|BIN Taxonomy Match|BOLD:AAA8204  
Limnophyes minimus|BIOUG42964-C03|Kate Perez|BIN Taxonomy Match below Phylum (Jun 2019)|BOL...  
Limnophyes minimus|BIOUG04437-C11|Kate Perez|BIN Taxonomy Match|BOLD:AAA8204  
Limnophyes minimus|BIOUG05395-F11|Kate Perez|BIN Taxonomy Match|BOLD:AAA8204  
Limnophyes minimus|BIOUG04261-D07|Kate Perez|BIN Taxonomy Match|BOLD:AAA8204  
Limnophyes minimus|BIOUG15808-A03|Kate Perez|BIN Taxonomy Match|BOLD:AAA8204  
Limnophyes minimus|BIOUG16597-D01|Kate Perez|BIN Taxonomy Match|BOLD:AAA8204  
Limnophyes minimus|ATNA420|Elisabeth Stur|BOLD:AAA8204  
Limnophyes minimus|BIOUG16218-E08|Kate Perez|BIN Taxonomy Match|BOLD:AAA8204  
Limnophyes minimus|BIOUG15806-F11|Kate Perez|BIN Taxonomy Match|BOLD:AAA8204  
Limnophyes minimus|BIOUG15798-H01|Kate Perez|BIN Taxonomy Match|BOLD:AAA8204  
Limnophyes minimus|BIOUG04433-D06|Kate Perez|BIN Taxonomy Match|BOLD:AAA8204  
Limnophyes minimus|NHRS-BYWS00000903|Yngve Brodin|morphology|BOLD:AAA8204  
Limnophyes minimus|BIOUG04216-A11|Kate Perez|BIN Taxonomy Match|BOLD:AAA8204  
Limnophyes minimus|BIOUG05219-B11|Kate Perez|BIN Taxonomy Match|BOLD:AAA8204  
Limnophyes minimus|BIOUG15765-B01|Kate Perez|BIN Taxonomy Match|BOLD:AAA8204  
Limnophyes minimus|BIOUG16622-G07|Kate Perez|BIN Taxonomy Match|BOLD:AAA8204  
Limnophyes minimus|BIOUG36725-A01|Kate Perez|BIN Taxonomy Match (May 2018)|BOLD:AAA8204  
Limnophyes minimus|BIOUG08097-B12|Kate Perez|BIN Taxonomy Match|BOLD:AAA8204  
Limnophyes minimus|BIOUG16597-G07|Kate Perez|BIN Taxonomy Match|BOLD:AAA8204  
Limnophyes minimus|CCDB22605-D11|Sofia Wiedenbrug|BOLD:AAA8204  
Limnophyes minimus|ZSM-DIP-33138-A08|Caroline Chimento|BIN Taxonomy Match (Jan 2022)|BOLD ...  
Limnophyes minimus|BIOUG05778-H02|Kate Perez|BIN Taxonomy Match|BOLD:AAA8204  
Limnophyes minimus|BIOUG16205-A10|Kate Perez|BIN Taxonomy Match|BOLD:AAA8204  
Limnophyes minimus|BIOUG06056-F12|Kate Perez|BIN Taxonomy Match|BOLD:AAA8204  
Limnophyes minimus|BIOUG15761-H11|Kate Perez|BIN Taxonomy Match|BOLD:AAA8204  
Limnophyes minimus|BIOUG15899-A04|Kate Perez|BIN Taxonomy Match|BOLD:AAA8204  
Limnophyes minimus|BIOUG08369-A07|Kate Perez|BIN Taxonomy Match|BOLD:AAA8204  
Limnophyes minimus|BIOUG15763-C01|Kate Perez|BIN Taxonomy Match|BOLD:AAA8204  
Limnophyes minimus|BIOUG15895-F08|Kate Perez|BIN Taxonomy Match|BOLD:AAA8204  
Limnophyes minimus|BIOUG15855-H07|Kate Perez|BIN Taxonomy Match|BOLD:AAA8204  
Limnophyes minimus|BIOUG17178-D02|Kate Perez|BIN Taxonomy Match|BOLD:AAA8204  
Limnophyes minimus|BIOUG07567-B03|Kate Perez|BIN Taxonomy Match|BOLD:AAA8204  
Limnophyes minimus|BIOUG15797-H03|Kate Perez|BIN Taxonomy Match|BOLD:AAA8204  
Limnophyes minimus|BIOUG15718-F08|Kate Perez|BIN Taxonomy Match|BOLD:AAA8204  
Limnophyes minimus|BIOUG16434-C07|Kate Perez|BIN Taxonomy Match|BOLD:AAA8204  
Limnophyes minimus|BIOUG15762-H08|Kate Perez|BIN Taxonomy Match|BOLD:AAA8204  
Limnophyes minimus|BIOUG07565-E10|Kate Perez|BIN Taxonomy Match|BOLD:AAA8204  
Limnophyes minimus|BIOUG15541-H07|Kate Perez|BIN Taxonomy Match|BOLD:AAA8204  
Limnophyes minimus|BIOUG16712-H02|Kate Perez|BIN Taxonomy Match|BOLD:AAA8204  
Limnophyes minimus|BIOUG07929-C12|Kate Perez|BIN Taxonomy Match|BOLD:AAA8204  
Limnophyes minimus|BIOUG07564-C04|Kate Perez|BIN Taxonomy Match|BOLD:AAA8204  
Limnophyes minimus|BIOUG08174-C07|Kate Perez|BIN Taxonomy Match|BOLD:AAA8204  
Limnophyes minimus|BIOUG15794-E03|Kate Perez|BIN Taxonomy Match|BOLD:AAA8204  
Limnophyes minimus|BIOUG07944-A01|Kate Perez|BIN Taxonomy Match|BOLD:AAA8204  
Limnophyes minimus|BIOUG15796-B10|Kate Perez|BIN Taxonomy Match|BOLD:AAA8204  
Limnophyes minimus|BIOUG15674-C07|Kate Perez|BIN Taxonomy Match|BOLD:AAA8204  
Limnophyes minimus|BIOUG07809-B09|Kate Perez|BIN Taxonomy Match|BOLD:AAA8204  
Limnophyes minimus|BIOUG08367-E12|Kate Perez|BIN Taxonomy Match|BOLD:AAA8204  
Limnophyes minimus|BIOUG08362-A08|Kate Perez|BIN Taxonomy Match|BOLD:AAA8204  
Limnophyes minimus|BIOUG08097-F12|Kate Perez|BIN Taxonomy Match|BOLD:AAA8204  
Limnophyes minimus|BIOUG07809-D10|Kate Perez|BIN Taxonomy Match|BOLD:AAA8204  
Limnophyes minimus|BIOUG15457-E12|Kate Perez|BIN Taxonomy Match|BOLD:AAA8204  
Limnophyes minimus|BIOUG16433-F12|Kate Perez|BIN Taxonomy Match|BOLD:AAA8204  
Limnophyes minimus|BIOUG43079-B09|Kate Perez|BIN Taxonomy Match below Phylum (Jun 2019)|BOL...  
Limnophyes minimus|BIOUG05778-D04|Kate Perez|BIN Taxonomy Match|BOLD:AAA8204  
Limnophyes minimus|BIOUG15538-A05|Kate Perez|BIN Taxonomy Match|BOLD:AAA8204  
Limnophyes minimus|BIOUG05267-C03|Kate Perez|BIN Taxonomy Match|BOLD:AAA8204  
Limnophyes minimus|BIOUG42961-C03|Kate Perez|BIN Taxonomy Match below Phylum (Jun 2019)|BOL...  
Limnophyes minimus|BIOUG15541-D07|Kate Perez|BIN Taxonomy Match|BOLD:AAA8204  
Limnophyes minimus|BIOUG07566-B10|Kate Perez|BIN Taxonomy Match|BOLD:AAA8204  
Limnophyes minimus|BIOUG07929-B11|Kate Perez|BIN Taxonomy Match|BOLD:AAA8204  
Limnophyes minimus|BIOUG07847-E08|Kate Perez|BIN Taxonomy Match|BOLD:AAA8204  
Limnophyes minimus|BIOUG15806-H06|Kate Perez|BIN Taxonomy Match|BOLD:AAA8204  
Limnophyes minimus|BIOUG07408-F07|Kate Perez|BIN Taxonomy Match|BOLD:AAA8204  
Limnophyes minimus|BIOUG16434-G01|Kate Perez|BIN Taxonomy Match|BOLD:AAA8204  
Limnophyes minimus|BIOUG06051-C09|Kate Perez|BIN Taxonomy Match|BOLD:AAA8204  
Limnophyes minimus|ZSM-DIP-33143-A10|Caroline Chimento|BIN Taxonomy Match (Jan 2022)|BOLD ...  
Limnophyes minimus|BIOUG15652-A03|Kate Perez|BIN Taxonomy Match|BOLD:AAA8204  
Limnophyes minimus|BIOUG07406-F04|Kate Perez|BIN Taxonomy Match|BOLD:AAA8204  
Limnophyes minimus|BIOUG16479-C04|Kate Perez|Tree based identification|BOLD:AAA8204  
Limnophyes minimus|CCDB22605-F07|Sofia Wiedenbrug|BOLD:AAA8204  
Limnophyes minimus|BIOUG15899-B05|Kate Perez|BIN Taxonomy Match|BOLD:AAA8204  
Limnophyes minimus|BIOUG07646-C06|Kate Perez|BIN Taxonomy Match|BOLD:AAA8204  
Limnophyes minimus|BIOUG16597-E03|Kate Perez|BIN Taxonomy Match|BOLD:AAA8204  
Limnophyes minimus|BIOUG05141-D03|Kate Perez|BIN Taxonomy Match|BOLD:AAA8204  
Limnophyes minimus|BIOUG15543-A09|Kate Perez|BIN Taxonomy Match|BOLD:AAA8204  
Limnophyes minimus|BIOUG16476-E12|Kate Perez|BIN Taxonomy Match|BOLD:AAA8204  
Limnophyes minimus|BIOUG15536-B12|Kate Perez|BIN Taxonomy Match|BOLD:AAA8204  
Limnophyes minimus|ZSM-DIP-33146-F11|Caroline Chimento|BIN Taxonomy Match (Jan 2022)|BOLD ...  
Limnophyes minimus|BIOUG07646-D10|Kate Perez|BIN Taxonomy Match|BOLD:AAA8204  
Limnophyes minimus|BIOUG07415-F01|Kate Perez|BIN Taxonomy Match|BOLD:AAA8204  
Limnophyes minimus|BIOUG15595-D07|Kate Perez|BIN Taxonomy Match|BOLD:AAA8204  
Limnophyes minimus|BIOUG07414-B07|Kate Perez|BIN Taxonomy Match|BOLD:AAA8204

Limnophyes minimus|BIOUG07415-F01|Kate Perez|BIN Taxonomy Match|BOLD:AAA8204  
Limnophyes minimus|BIOUG15595-D07|Kate Perez|BIN Taxonomy Match|BOLD:AAA8204  
Limnophyes minimus|BIOUG07414-B07|Kate Perez|BIN Taxonomy Match|BOLD:AAA8204  
Limnophyes minimus|CH-OSF67|Elisabeth Sturj|BOLD:AAA8204  
Limnophyes minimus|BIOUG08180-A08|Kate Perez|BIN Taxonomy Match|BOLD:AAA8204  
Limnophyes minimus|BIOUG15762-G09|Kate Perez|BIN Taxonomy Match|BOLD:AAA8204  
Limnophyes minimus|BIOUG15540-D10|Kate Perez|BIN Taxonomy Match|BOLD:AAA8204  
Limnophyes minimus|BIOUG15764-A11|Kate Perez|BIN Taxonomy Match|BOLD:AAA8204  
Limnophyes minimus|BIOUG15794-H04|Kate Perez|BIN Taxonomy Match|BOLD:AAA8204  
Limnophyes minimus|BIOUG15794-F09|Kate Perez|BIN Taxonomy Match|BOLD:AAA8204  
Limnophyes minimus|BIOUG07563-G08|Kate Perez|BIN Taxonomy Match|BOLD:AAA8204  
Limnophyes minimus|BIOUG08125-C09|Kate Perez|BIN Taxonomy Match|BOLD:AAA8204  
Limnophyes minimus|BIOUG15899-B02|Kate Perez|BIN Taxonomy Match|BOLD:AAA8204  
Limnophyes minimus|BIOUG16270-E08|Kate Perez|BIN Taxonomy Match|BOLD:AAA8204  
Limnophyes minimus|BIOUG15765-H01|Kate Perez|BIN Taxonomy Match|BOLD:AAA8204  
Limnophyes minimus|BIOUG08255-H03|Kate Perez|BIN Taxonomy Match|BOLD:AAA8204  
Limnophyes minimus|BIOUG15457-C02|Kate Perez|BIN Taxonomy Match|BOLD:AAA8204  
Limnophyes minimus|BIOUG15895-A12|Kate Perez|BIN Taxonomy Match|BOLD:AAA8204  
Limnophyes minimus|BIOUG08094-C12|Kate Perez|BIN Taxonomy Match|BOLD:AAA8204  
Limnophyes minimus|BIOUG08260-E05|Kate Perez|BIN Taxonomy Match|BOLD:AAA8204  
Limnophyes minimus|BIOUG15977-F04|Kate Perez|BIN Taxonomy Match|BOLD:AAA8204  
Limnophyes minimus|BIOUG15465-B07|Kate Perez|BIN Taxonomy Match|BOLD:AAA8204  
Limnophyes minimus|BIOUG16435-C08|Kate Perez|BIN Taxonomy Match|BOLD:AAA8204  
Limnophyes minimus|BIOUG08097-G07|Kate Perez|BIN Taxonomy Match|BOLD:AAA8204  
Limnophyes minimus|BIOUG07568-E01|Kate Perez|BIN Taxonomy Match|BOLD:AAA8204  
Limnophyes minimus|BIOUG07566-G01|Kate Perez|BIN Taxonomy Match|BOLD:AAA8204  
Limnophyes minimus|BIOUG36684-F03|Kate Perez|BIN Taxonomy Match (May 2018)|BOLD:AAA8204  
Limnophyes minimus|BIOUG36726-G09|Kate Perez|BIN Taxonomy Match (May 2018)|BOLD:AAA8204  
Limnophyes minimus|BIOUG15964-E08|Kate Perez|BIN Taxonomy Match|BOLD:AAA8204  
Limnophyes minimus|BIOUG16597-F05|Kate Perez|BIN Taxonomy Match|BOLD:AAA8204  
Limnophyes minimus|BIOUG07565-A01|Kate Perez|BIN Taxonomy Match|BOLD:AAA8204  
Limnophyes minimus|BIOUG07945-H06|Kate Perez|BIN Taxonomy Match|BOLD:AAA8204  
Limnophyes minimus|BIOUG15652-F02|Kate Perez|BIN Taxonomy Match|BOLD:AAA8204  
Limnophyes minimus|BIOUG15596-C08|Kate Perez|BIN Taxonomy Match|BOLD:AAA8204  
Limnophyes minimus|BIOUG07564-C09|Kate Perez|BIN Taxonomy Match|BOLD:AAA8204  
Limnophyes minimus|BIOUG07929-G06|Kate Perez|BIN Taxonomy Match|BOLD:AAA8204  
Limnophyes minimus|BIOUG04437-C10|Kate Perez|BIN Taxonomy Match|BOLD:AAA8204  
Limnophyes minimus|BIOUG15761-D04|Kate Perez|BIN Taxonomy Match|BOLD:AAA8204  
Limnophyes minimus|BIOUG15459-A02|Kate Perez|BIN Taxonomy Match|BOLD:AAA8204  
Limnophyes minimus|BIOUG36762-E07|Kate Perez|BIN Taxonomy Match (May 2018)|BOLD:AAA8204  
Limnophyes minimus|BIOUG42687-D04|Kate Perez|BIN Taxonomy Match below Phylum (Jun 2019)|BOL...  
Limnophyes minimus|BIOUG16478-E09|Kate Perez|BIN Taxonomy Match|BOLD:AAA8204  
Limnophyes minimus|BIOUG15762-G01|Kate Perez|BIN Taxonomy Match|BOLD:AAA8204  
Limnophyes minimus|BIOUG15674-F10|Kate Perez|BIN Taxonomy Match|BOLD:AAA8204  
Limnophyes minimus|BIOUG42919-H09|Kate Perez|BIN Taxonomy Match below Phylum (Jun 2019)|BOL...  
Limnophyes minimus|BIOUG42759-H06|Kate Perez|BIN Taxonomy Match below Phylum (Jun 2019)|BOL...  
Limnophyes minimus|BIOUG42675-D02|Kate Perez|BIN Taxonomy Match below Phylum (Jun 2019)|BOL...  
Limnophyes minimus|BIOUG42680-A09|Kate Perez|BIN Taxonomy Match below Phylum (Jun 2019)|BOL...  
Limnophyes minimus|BIOUG42964-F09|Kate Perez|BIN Taxonomy Match below Phylum (Jun 2019)|BOL...  
Limnophyes minimus|BIOUG42966-C10|Kate Perez|BIN Taxonomy Match below Phylum (Jun 2019)|BOL...  
Limnophyes minimus|ZSM-DIP-33141-H05|Caroline Chimenó|BIN Taxonomy Match (Jan 2022)|BOLD ...  
Limnophyes minimus|ZSM-DIP-33137-E08|Caroline Chimenó|BIN Taxonomy Match (Jan 2022)|BOLD ...  
Limnophyes minimus|BIOUG42921-F04|Kate Perez|BIN Taxonomy Match below Phylum (Jun 2019)|BOL...  
Limnophyes minimus|BIOUG42965-B04|Kate Perez|BIN Taxonomy Match below Phylum (Jun 2019)|BOL...  
Limnophyes minimus|ZSM-DIP-33137-D05|Caroline Chimenó|BIN Taxonomy Match (Jan 2022)|BOLD ...  
Limnophyes minimus|BIOUG55414-E08|Stefan Schmidt|BIN Taxonomy Match (Sep 2020)|BOLD:AAA8204  
Limnophyes minimus|ZSM-DIP-33131-C04|Caroline Chimenó|BIN Taxonomy Match (Jan 2022)|BOLD ...  
Limnophyes minimus|BIOUG07415-D10|Kate Perez|BIN Taxonomy Match|BOLD:AAA8204  
Limnophyes minimus|BIOUG16596-D03|Kate Perez|BIN Taxonomy Match|BOLD:AAA8204  
Limnophyes minimus|BIOUG16626-C01|Kate Perez|BIN Taxonomy Match|BOLD:AAA8204  
Limnophyes minimus|ZSM-DIP-33143-G12|Caroline Chimenó|BIN Taxonomy Match (Jan 2022)|BOLD ...  
Limnophyes minimus|BIOUG16476-F09|Kate Perez|BIN Taxonomy Match|BOLD:AAA8204  
Limnophyes minimus|BIOUG15809-G09|Kate Perez|BIN Taxonomy Match|BOLD:AAA8204  
Limnophyes minimus|BIOUG15720-H09|Kate Perez|BIN Taxonomy Match|BOLD:AAA8204  
Limnophyes minimus|BIOUG15720-B07|Kate Perez|BIN Taxonomy Match|BOLD:AAA8204  
Limnophyes minimus|BIOUG08132-A12|Kate Perez|BIN Taxonomy Match|BOLD:AAA8204  
Limnophyes minimus|BIOUG07758-C10|Kate Perez|BIN Taxonomy Match|BOLD:AAA8204  
Limnophyes minimus|BIOUG36841-D05|Kate Perez|BIN Taxonomy Match (Jul 2018)|BOLD:AAA8204  
Limnophyes minimus|BIOUG16214-B07|Kate Perez|BIN Taxonomy Match|BOLD:AAA8204  
Limnophyes minimus|BIOUG05778-D07|Kate Perez|BIN Taxonomy Match|BOLD:AAA8204  
Limnophyes minimus|BIOUG15455-B07|Kate Perez|BIN Taxonomy Match|BOLD:AAA8204  
Limnophyes minimus|BIOUG42700-G08|Kate Perez|BIN Taxonomy Match below Phylum (Jun 2019)|BOL...  
Limnophyes minimus|ZSM-DIP-33132-H10|Caroline Chimenó|BIN Taxonomy Match (Jan 2022)|BOLD ...  
Limnophyes minimus|BIOUG04155-F06|Kate Perez|BIN Taxonomy Match|BOLD:AAA8204  
Limnophyes minimus|BIOUG04085-C05|Kate Perez|BIN Taxonomy Match|BOLD:AAA8204  
Limnophyes minimus|BIOUG05946-C08|Kate Perez|BIN Taxonomy Match|BOLD:AAA8204  
Limnophyes minimus|BIOUG04433-C11|Kate Perez|BIN Taxonomy Match|BOLD:AAA8204  
Limnophyes minimus|BIOUG04362-C06|Kate Perez|BIN Taxonomy Match|BOLD:AAA8204  
Limnophyes minimus|BIOUG04296-E05|Kate Perez|BIN Taxonomy Match|BOLD:AAA8204  
Limnophyes minimus|BIOUG04153-A10|Kate Perez|BIN Taxonomy Match|BOLD:AAA8204  
Limnophyes minimus|BIOUG04090-D06|Kate Perez|BIN Taxonomy Match|BOLD:AAA8204  
Limnophyes minimus|BIOUG04216-E09|Kate Perez|BIN Taxonomy Match|BOLD:AAA8204  
Limnophyes minimus|BIOUG15806-G08|Kate Perez|BIN Taxonomy Match|BOLD:AAA8204  
Limnophyes minimus|BIOUG15762-H09|Kate Perez|BIN Taxonomy Match|BOLD:AAA8204  
Limnophyes minimus|BIOUG15766-A05|Kate Perez|BIN Taxonomy Match|BOLD:AAA8204  
Limnophyes minimus|BIOUG15536-D06|Kate Perez|BIN Taxonomy Match|BOLD:AAA8204  
Limnophyes minimus|ZSM34343-F07|Sofia Wiedenbrug|Morphology|BOLD:AAA8204  
Limnophyes minimus|ZSM34343-F11|Sofia Wiedenbrug|Morphology|BOLD:AAA8204  
Limnophyes minimus|BIOUG43077-D02|Kate Perez|BIN Taxonomy Match below Phylum (Jun 2019)|BOL...  
Limnophyes minimus|BIOUG15718-F02|Kate Perez|BIN Taxonomy Match|BOLD:AAA8204  
Limnophyes minimus|BIOUG07929-E03|Kate Perez|BIN Taxonomy Match|BOLD:AAA8204  
Limnophyes minimus|BIOUG07755-A10|Kate Perez|BIN Taxonomy Match|BOLD:AAA8204  
Limnophyes minimus|BIOUG15650-F11|Kate Perez|BIN Taxonomy Match|BOLD:AAA8204  
Limnophyes minimus|CCDB21606-E11|Sofia Wiedenbrug|BOLD:AAA8204  
Limnophyes minimus|BIOUG42970-H03|Kate Perez|BIN Taxonomy Match below Phylum (Jun 2019)|BOL...  
Limnophyes minimus|BIOUG05399-C05|Kate Perez|BIN Taxonomy Match|BOLD:AAA8204  
Limnophyes minimus|BIOUG08259-B12|Kate Perez|BIN Taxonomy Match|BOLD:AAA8204  
Limnophyes minimus|BIOUG55191-H10|Stefan Schmidt|BIN Taxonomy Match (Sep 2020)|BOLD:AAA8204  
Limnophyes minimus|BIOUG15647-D05|Kate Perez|BIN Taxonomy Match|BOLD:AAA8204  
Limnophyes minimus|BIOUG15458-G04|Kate Perez|BIN Taxonomy Match|BOLD:AAA8204  
Limnophyes minimus|BIOUG05219-E04|Kate Perez|BIN Taxonomy Match|BOLD:AAA8204  
Limnophyes minimus|BIOUG15542-B10|Kate Perez|BIN Taxonomy Match|BOLD:AAA8204  
Limnophyes minimus|BIOUG15890-A07|Kate Perez|BIN Taxonomy Match|BOLD:AAA8204

Limnophyes minimus|BIOUG05219-E04|Kate Perez|BIN Taxonomy Match|BOLD:AAA8204  
Limnophyes minimus|BIOUG15542-B10|Kate Perez|BIN Taxonomy Match|BOLD:AAA8204  
Limnophyes minimus|BIOUG15899-A07|Kate Perez|BIN Taxonomy Match|BOLD:AAA8204  
Limnophyes minimus|BIOUG15458-B10|Kate Perez|BIN Taxonomy Match|BOLD:AAA8204  
Limnophyes minimus|BIOUG42668-E09|Kate Perez|BIN Taxonomy Match below Phylum (Jun 2019)|BOL...  
Limnophyes minimus|BIOUG06053-C05|Kate Perez|BIN Taxonomy Match|BOLD:AAA8204  
Limnophyes minimus|BIOUG05218-H09|Kate Perez|BIN Taxonomy Match|BOLD:AAA8204  
Limnophyes minimus|BIOUG05110-B04|Kate Perez|BIN Taxonomy Match|BOLD:AAA8204  
Limnophyes minimus|BIOUG05218-H05|Kate Perez|BIN Taxonomy Match|BOLD:AAA8204  
Limnophyes minimus|BIOUG06055-E06|Kate Perez|BIN Taxonomy Match|BOLD:AAA8204  
Limnophyes minimus|BIOUG07407-A03|Kate Perez|BIN Taxonomy Match|BOLD:AAA8204  
Limnophyes minimus|BIOUG07757-A01|Kate Perez|BIN Taxonomy Match|BOLD:AAA8204  
Limnophyes minimus|ZSM-DIP-33143-B10|Caroline Chimento|BIN Taxonomy Match (Jan 2022)|BOLD ...  
Limnophyes minimus|BIOUG07413-B08|Kate Perez|BIN Taxonomy Match|BOLD:AAA8204  
Limnophyes minimus|BIOUG07945-B05|Kate Perez|BIN Taxonomy Match|BOLD:AAA8204  
Limnophyes minimus|BIOUG08092-F08|Kate Perez|BIN Taxonomy Match|BOLD:AAA8204  
Limnophyes minimus|ZSM-DIP-33142-B01|Caroline Chimento|BIN Taxonomy Match (Jan 2022)|BOLD ...  
Limnophyes minimus|BIOUG07414-B12|Kate Perez|BIN Taxonomy Match|BOLD:AAA8204  
Limnophyes minimus|BIOUG08315-C02|Kate Perez|BIN Taxonomy Match|BOLD:AAA8204  
Limnophyes minimus|ZSM-DIP-33172-F06|Caroline Chimento|BIN Taxonomy Match (Jan 2022)|BOLD ...  
Limnophyes minimus|ZSM-DIP-33130-D06|Caroline Chimento|BIN Taxonomy Match (Jan 2022)|BOLD ...  
Limnophyes minimus|ZSM-DIP-33137-E06|Caroline Chimento|BIN Taxonomy Match (Jan 2022)|BOLD ...  
Limnophyes minimus|BIOUG42751-B02|Kate Perez|BIN Taxonomy Match below Phylum (Jun 2019)|BOL...  
Limnophyes minimus|BIOUG07805-F10|Kate Perez|BIN Taxonomy Match|BOLD:AAA8204  
Limnophyes minimus|BIOUG15651-F04|Kate Perez|BIN Taxonomy Match|BOLD:AAA8204  
Limnophyes minimus|BIOUG07755-B08|Kate Perez|BIN Taxonomy Match|BOLD:AAA8204  
Limnophyes minimus|BIOUG15565-B03|Kate Perez|BIN Taxonomy Match|BOLD:AAA8204  
Limnophyes minimus|BIOUG15540-D06|Kate Perez|BIN Taxonomy Match|BOLD:AAA8204  
Limnophyes minimus|BIOUG06056-F11|Kate Perez|BIN Taxonomy Match|BOLD:AAA8204  
Limnophyes minimus|BIOUG05218-F07|Kate Perez|BIN Taxonomy Match|BOLD:AAA8204  
Limnophyes minimus|BIOUG15457-H07|Kate Perez|Tree based identification|BOLD:AAA8204  
Limnophyes minimus|BIOUG07565-B08|Kate Perez|BIN Taxonomy Match|BOLD:AAA8204  
Limnophyes minimus|BIOUG07415-C04|Sofia Wiedenbrug|Morphology  
Chironomidae|BIOUG05269-B06|Meredit Miller|Tree-based Identification (Feb 2019)  
Limnophyes minimus|BIOUG05269-A08|Kate Perez|BIN Taxonomy Match|BOLD:AAA8204  
Limnophyes minimus|BIOUG16480-E11|Kate Perez|BIN Taxonomy Match|BOLD:AAA8204  
Limnophyes minimus|BIOUG15855-C12|Kate Perez|BIN Taxonomy Match|BOLD:AAA8204  
Limnophyes minimus|ZSM34343-G02|Sofia Wiedenbrug|Morphology|BOLD:AAA8204  
Limnophyes minimus|BIOUG15793-E07|Kate Perez|BIN Taxonomy Match|BOLD:AAA8204  
Limnophyes minimus|BIOUG15184-G11|Kate Perez|BIN Taxonomy Match|BOLD:AAA8204  
Limnophyes minimus|BIOUG15540-B12|Kate Perez|BIN Taxonomy Match|BOLD:AAA8204  
Limnophyes minimus|CH-OSF11|Elisabeth Stur|BOLD:AAA8204  
Limnophyes minimus|ZSM-DIP-33132-D01|Caroline Chimento|BIN Taxonomy Match (Jan 2022)|BOLD ...  
Limnophyes minimus|ZSM-DIP-33170-G04|Caroline Chimento|BIN Taxonomy Match (Jan 2022)|BOLD ...  
Limnophyes minimus|BIOUG06056-F09|Kate Perez|BIN Taxonomy Match|BOLD:AAA8204  
Limnophyes minimus|BIOUG04437-D12|Kate Perez|BIN Taxonomy Match|BOLD:AAA8204  
Limnophyes minimus|BIOUG05109-G09|Kate Perez|BIN Taxonomy Match|BOLD:AAA8204  
Limnophyes minimus|BIOUG07805-H03|Kate Perez|BIN Taxonomy Match|BOLD:AAA8204  
Limnophyes minimus|BIOUG16627-B09|Kate Perez|BIN Taxonomy Match|BOLD:AAA8204  
Limnophyes minimus|BIOUG05266-D11|Kate Perez|BIN Taxonomy Match|BOLD:AAA8204  
Limnophyes minimus|BIOUG08131-F11|Kate Perez|BIN Taxonomy Match|BOLD:AAA8204  
Limnophyes minimus|BIOUG07647-G09|Kate Perez|BIN Taxonomy Match|BOLD:AAA8204  
Limnophyes minimus|BIOUG07759-B12|Kate Perez|BIN Taxonomy Match|BOLD:AAA8204  
Limnophyes minimus|BIOUG15766-C01|Kate Perez|BIN Taxonomy Match|BOLD:AAA8204  
Limnophyes minimus|BIOUG42761-G06|Kate Perez|BIN Taxonomy Match below Phylum (Jun 2019)|BOL...  
Limnophyes minimus|BIOUG15766-A06|Kate Perez|BIN Taxonomy Match|BOLD:AAA8204  
Limnophyes minimus|CCDB21606-E12|Sofia Wiedenbrug|BOLD:AAA8204  
Limnophyes minimus|BIOUG42966-B05|Kate Perez|BIN Taxonomy Match below Phylum (Jun 2019)|BOL...  
Limnophyes minimus|BIOUG15718-B04|Kate Perez|BIN Taxonomy Match|BOLD:AAA8204  
Limnophyes minimus|BIOUG08174-F09|Kate Perez|BIN Taxonomy Match|BOLD:AAA8204  
Limnophyes minimus|Finmark647|Elisabeth Stur|BOLD:AAA8204  
Limnophyes minimus|ZSM-DIP-33131-F05|Caroline Chimento|BIN Taxonomy Match (Jan 2022)|BOLD ...  
Limnophyes minimus|BIOUG42960-A02|Kate Perez|BIN Taxonomy Match below Phylum (Jun 2019)|BOL...  
Limnophyes minimus|CH-eik29|Elisabeth Stur|BOLD:AAA8204  
Limnophyes minimus|CH-eik14|Elisabeth Stur|BOLD:AAA8204  
Limnophyes minimus|NHRS-BYWS000000152|Yngve Brodin|morphology|BOLD:AAA8204  
Limnophyes minimus|CH-eik30|Elisabeth Stur|BOLD:AAA8204  
Limnophyes minimus|NHRS-BYWS000000560|Yngve Brodin|morphology|BOLD:AAA8204  
Limnophyes minimus|NHRS-BYWS000000187|Yngve Brodin|morphology|BOLD:AAA8204  
Limnophyes minimus|CCDB24183-G10|Sofia Wiedenbrug|Morphology|BOLD:AAA8204  
Limnophyes minimus|CCDB24183-B01|Sofia Wiedenbrug|Morphology|BOLD:AAA8204  
Limnophyes minimus|ZSM-DIP-33141-C06|Caroline Chimento|BIN Taxonomy Match (Jan 2022)|BOLD ...  
Limnophyes minimus|ZSM-DIP-33131-G05|Caroline Chimento|BIN Taxonomy Match (Jan 2022)|BOLD ...  
Limnophyes minimus|BIOUG54162-C10|Stefan Schmidt|BIN Taxonomy Match (Sep 2020)|BOLD:AAA8204  
Limnophyes minimus|CCDB24183-H03|Sofia Wiedenbrug|BIN-taxonomy|BOLD:AAA8204  
Limnophyes minimus|ZSM-DIP-33138-H05|Caroline Chimento|BIN Taxonomy Match (Jan 2022)|BOLD ...  
Limnophyes minimus|ZSM-DIP-33138-B01|Caroline Chimento|BIN Taxonomy Match (Jan 2022)|BOLD ...  
Limnophyes minimus|NHRS-BYWS000000232|Yngve Brodin|morphology|BOLD:AAA8204  
Limnophyes minimus|ZSM-DIP-33140-D10|Caroline Chimento|BIN Taxonomy Match (Jan 2022)|BOLD ...  
Limnophyes minimus|ZMUO.024691|Lauri Paasivirta|BOLD:AAA8204  
Limnophyes minimus|ZMUO.024690|Lauri Paasivirta|BOLD:AAA8204  
Limnophyes minimus|GBOL11560|Sofia Wiedenbrug|BOLD:AAA8204  
Limnophyes minimus|ZMUO.024266|Lauri Paasivirta|BOLD:AAA8204  
Limnophyes minimus|CCDB22605-D10|Sofia Wiedenbrug|BOLD:AAA8204  
Limnophyes minimus|CCDB22605-D08|Sofia Wiedenbrug|BOLD:AAA8204  
Limnophyes minimus|ATNA388|Elisabeth Stur|BOLD:AAA8204  
Limnophyes minimus|RIN\_CH94|Mona Renate Saurasnet|BOLD Identification engine|BOLD:AAA8204  
Limnophyes minimus|CCDB22605-E11|Sofia Wiedenbrug|BOLD:AAA8204  
Limnophyes minimus|BIOUG05141-E08|Kate Perez|BIN Taxonomy Match|BOLD:AAA8204  
Limnophyes minimus|BIOUG16597-F11|Kate Perez|BIN Taxonomy Match|BOLD:AAA8204  
Limnophyes minimus|BIOUG15764-C09|Kate Perez|BIN Taxonomy Match|BOLD:AAA8204  
Limnophyes minimus|BIOUG16328-C04|Kate Perez|BIN Taxonomy Match|BOLD:AAA8204  
Limnophyes minimus|BIOUG15853-E03|Kate Perez|BIN Taxonomy Match|BOLD:AAA8204  
Limnophyes minimus|BIOUG15720-D12|Kate Perez|BIN Taxonomy Match|BOLD:AAA8204  
Limnophyes minimus|BIOUG15762-E04|Kate Perez|BIN Taxonomy Match|BOLD:AAA8204  
Limnophyes minimus|BIOUG16597-E01|Kate Perez|BIN Taxonomy Match|BOLD:AAA8204  
Limnophyes minimus|BIOUG15764-B03|Kate Perez|BIN Taxonomy Match|BOLD:AAA8204  
Limnophyes minimus|BIOUG15948-A05|Kate Perez|BIN Taxonomy Match|BOLD:AAA8204  
Limnophyes minimus|BIOUG16298-E05|Kate Perez|BIN Taxonomy Match|BOLD:AAA8204  
Limnophyes minimus|BIOUG15563-C10|Kate Perez|BIN Taxonomy Match|BOLD:AAA8204  
Limnophyes minimus|BIOUG16436-H08|Kate Perez|BIN Taxonomy Match|BOLD:AAA8204  
Limnophyes minimus|BIOUG15458-E04|Kate Perez|BIN Taxonomy Match|BOLD:AAA8204

Limnophyes minimus|BIOUG15563-C10|Kate Perez|BIN Taxonomy Match|BOLD:AAA8204  
Limnophyes minimus|BIOUG16436-H08|Kate Perez|BIN Taxonomy Match|BOLD:AAA8204  
Limnophyes minimus|BIOUG15458-E04|Kate Perez|BIN Taxonomy Match|BOLD:AAA8204  
Limnophyes minimus|BIOUG15806-D07|Kate Perez|BIN Taxonomy Match|BOLD:AAA8204  
Limnophyes minimus|BIOUG15718-A11|Kate Perez|BIN Taxonomy Match|BOLD:AAA8204  
Limnophyes minimus|BIOUG55165-D02|Stefan Schmidt|BIN Taxonomy Match (Sep 2020)|BOLD:AAA8204  
Limnophyes minimus|ZSM-DIP-33170-G05|Caroline Chimento|BIN Taxonomy Match (Jan 2022)|BOLD ...  
Limnophyes minimus|ZSM-DIP-33133-D12|Caroline Chimento|BIN Taxonomy Match (Jan 2022)|BOLD ...  
Limnophyes minimus|BIOUG16596-H11|Kate Perez|BIN Taxonomy Match|BOLD:AAA8204  
Limnophyes minimus|BIOUG15653-F08|Kate Perez|BIN Taxonomy Match|BOLD:AAA8204  
Limnophyes minimus|BIOUG05778-B05|Kate Perez|BIN Taxonomy Match|BOLD:AAA8204  
Limnophyes minimus|BIOUG05400-E02|Kate Perez|BIN Taxonomy Match|BOLD:AAA8204  
Limnophyes minimus|BIOUG07567-H02|Kate Perez|BIN Taxonomy Match|BOLD:AAA8204  
Limnophyes minimus|BIOUG05104-F12|Kate Perez|BIN Taxonomy Match|BOLD:AAA8204  
Limnophyes minimus|BIOUG07568-H08|Kate Perez|BIN Taxonomy Match|BOLD:AAA8204  
Limnophyes minimus|ZSM-DIP-33133-H01|Caroline Chimento|BIN Taxonomy Match (Jan 2022)|BOLD ...  
Limnophyes minimus|BIOUG04212-B11|Kate Perez|BIN Taxonomy Match|BOLD:AAA8204  
Limnophyes minimus|BIOUG04437-H03|Kate Perez|BIN Taxonomy Match|BOLD:AAA8204  
Limnophyes minimus|BIOUG06053-A02|Kate Perez|BIN Taxonomy Match|BOLD:AAA8204  
Limnophyes minimus|BIOUG07930-A10|Kate Perez|BIN Taxonomy Match|BOLD:AAA8204  
Limnophyes minimus|BIOUG04269-D02|Kate Perez|BIN Taxonomy Match|BOLD:AAA8204  
Limnophyes minimus|BIOUG04212-G01|Kate Perez|BIN Taxonomy Match|BOLD:AAA8204  
Limnophyes minimus|BIOUG15952-A01|Kate Perez|Tree based identification|BOLD:AAA8204  
Limnophyes minimus|ZSM-DIP-33132-G12|Caroline Chimento|BIN Taxonomy Match (Jan 2022)|BOLD ...  
Limnophyes minimus|ZSM-DIP-33137-E10|Caroline Chimento|BIN Taxonomy Match (Jan 2022)|BOLD ...  
Limnophyes minimus|BIOUG06058-H11|Kate Perez|BIN Taxonomy Match|BOLD:AAA8204  
Limnophyes minimus|BIOUG06516-D11|Kate Perez|BIN Taxonomy Match|BOLD:AAA8204  
Limnophyes minimus|BIOUG07413-F11|Kate Perez|BIN Taxonomy Match|BOLD:AAA8204  
Limnophyes minimus|BIOUG08179-C12|Kate Perez|BIN Taxonomy Match|BOLD:AAA8204  
Limnophyes minimus|BIOUG15769-D06|Kate Perez|BIN Taxonomy Match|BOLD:AAA8204  
Limnophyes minimus|CCDB22605-D07|Sofia Wiedenbrug|BOLD:AAA8204  
Limnophyes minimus|ZSM-DIP-33149-D09|Caroline Chimento|BIN Taxonomy Match (Jan 2022)|BOLD ...  
Limnophyes minimus|BIOUG42945-F04|Kate Perez|BIN Taxonomy Match below Phylum (Jun 2019)|BOL...  
Limnophyes minimus|BIOUG42749-A12|Kate Perez|BIN Taxonomy Match below Phylum (Jun 2019)|BOL...  
Limnophyes minimus|BIOUG15598-G11|Kate Perez|BIN Taxonomy Match|BOLD:AAA8204  
Limnophyes minimus|BIOUG04261-B12|Kate Perez|BIN Taxonomy Match|BOLD:AAA8204  
Limnophyes minimus|ZSM-DIP-33133-E03|Caroline Chimento|BIN Taxonomy Match (Jan 2022)|BOLD ...  
Limnophyes minimus|BIOUG15764-H05|Kate Perez|BIN Taxonomy Match|BOLD:AAA8204  
Limnophyes minimus|ZSM-DIP-33172-F04|Caroline Chimento|BIN Taxonomy Match (Jan 2022)|BOLD ...  
Limnophyes minimus|ZSM-DIP-33136-E11|Caroline Chimento|BIN Taxonomy Match (Jan 2022)|BOLD ...  
Limnophyes minimus|BIOUG15795-A08|Kate Perez|Tree based identification|BOLD:AAA8204  
Limnophyes minimus|CCDB21606-F03|Sofia Wiedenbrug|BOLD:AAA8204  
Limnophyes minimus|ZSM-DIP-33143-G07|Caroline Chimento|BIN Taxonomy Match (Jan 2022)|BOLD ...  
Limnophyes minimus|CH-eik16|Elisabeth Stur|BOLD:AAA8204  
Limnophyes minimus|BIOUG15794-B05|Kate Perez|BIN Taxonomy Match|BOLD:AAA8204  
Limnophyes minimus|BIOUG06052-F02|Kate Perez|BIN Taxonomy Match|BOLD:AAA8204  
Limnophyes minimus|BIOUG16597-C01|Kate Perez|BIN Taxonomy Match|BOLD:AAA8204  
Limnophyes minimus|BIOUG15761-B03|Kate Perez|BIN Taxonomy Match|BOLD:AAA8204  
Limnophyes minimus|CCDB22605-E10|Sofia Wiedenbrug|BOLD:AAA8204  
Limnophyes minimus|ZSM-DIP-33170-G03|Caroline Chimento|BIN Taxonomy Match (Jan 2022)|BOLD ...  
Limnophyes minimus|BIOUG42742-G09|Kate Perez|BIN Taxonomy Match below Phylum (Jun 2019)|BOL...  
Limnophyes minimus|BIOUG42753-A05|Kate Perez|BIN Taxonomy Match below Phylum (Jun 2019)|BOL...  
Limnophyes minimus|ZSM-DIP-33170-H03|Caroline Chimento|BIN Taxonomy Match (Jan 2022)|BOLD ...  
Limnophyes minimus|BIOUG08095-G07|Kate Perez|BIN Taxonomy Match|BOLD:AAA8204  
Limnophyes minimus|BIOUG55416-F02|Stefan Schmidt|BIN Taxonomy Match (Sep 2020)|BOLD:AAA8204  
Limnophyes minimus|ZSM-DIP-33170-H01|Caroline Chimento|BIN Taxonomy Match (Jan 2022)|BOLD ...  
Limnophyes minimus|BIOUG42747-H06|Kate Perez|BIN Taxonomy Match below Phylum (Jun 2019)|BOL...  
Limnophyes minimus|BIOUG42753-E01|Kate Perez|BIN Taxonomy Match below Phylum (Jun 2019)|BOL...  
Limnophyes minimus|BIOUG43080-D04|Kate Perez|BIN Taxonomy Match below Phylum (Jun 2019)|BOL...  
Limnophyes minimus|BIOUG08125-E05|Kate Perez|BIN Taxonomy Match|BOLD:AAA8204  
Limnophyes minimus|ZSM-DIP-33136-F10|Caroline Chimento|BIN Taxonomy Match (Jan 2022)|BOLD ...  
Limnophyes minimus|BIOUG43078-A08|Kate Perez|BIN Taxonomy Match below Phylum (Jun 2019)|BOL...  
Limnophyes minimus|BIOUG42748-F09|Kate Perez|BIN Taxonomy Match below Phylum (Jun 2019)|BOL...  
Limnophyes minimus|GBOL11511|Sofia Wiedenbrug|BOLD:AAA8204  
Limnophyes minimus|BIOUG07810-E08|Kate Perez|BIN Taxonomy Match|BOLD:AAA8204  
Limnophyes minimus|BIOUG04216-A01|Kate Perez|BIN Taxonomy Match|BOLD:AAA8204  
Limnophyes minimus|BIOUG07413-E10|Kate Perez|BIN Taxonomy Match|BOLD:AAA8204  
Limnophyes minimus|BIOUG16205-D07|Kate Perez|BIN Taxonomy Match|BOLD:AAA8204  
Limnophyes minimus|BIOUG15809-E02|Kate Perez|BIN Taxonomy Match|BOLD:AAA8204  
Limnophyes minimus|BIOUG07569-G07|Kate Perez|BIN Taxonomy Match|BOLD:AAA8204  
Limnophyes minimus|BIOUG15809-F03|Kate Perez|Tree based identification|BOLD:AAA8204  
Limnophyes minimus|BIOUG15720-E10|Kate Perez|BIN Taxonomy Match|BOLD:AAA8204  
Limnophyes minimus|ZSM-DIP-33149-A11|Caroline Chimento|BIN Taxonomy Match (Jan 2022)|BOLD ...  
Limnophyes minimus|ZSM-DIP-33136-F05|Caroline Chimento|BIN Taxonomy Match (Jan 2022)|BOLD ...  
Limnophyes minimus|BIOUG42679-G09|Kate Perez|BIN Taxonomy Match below Phylum (Jun 2019)|BOL...  
Limnophyes minimus|BIOUG07418-D01|Kate Perez|BIN Taxonomy Match|BOLD:AAA8204  
Limnophyes minimus|BIOUG42922-G02|Kate Perez|BIN Taxonomy Match below Phylum (Jun 2019)|BOL...  
Limnophyes minimus|ZSM-DIP-33138-A10|Caroline Chimento|BIN Taxonomy Match (Jan 2022)|BOLD ...  
Limnophyes minimus|BIOUG43077-F01|Kate Perez|BIN Taxonomy Match below Phylum (Jun 2019)|BOL...  
Limnophyes minimus|BIOUG07568-C06|Kate Perez|BIN Taxonomy Match|BOLD:AAA8204  
Limnophyes minimus|BIOUG07413-D08|Kate Perez|BIN Taxonomy Match|BOLD:AAA8204  
Limnophyes minimus|BIOUG07568-F11|Kate Perez|BIN Taxonomy Match|BOLD:AAA8204  
Limnophyes minimus|BIOUG05144-E08|Kate Perez|BIN Taxonomy Match|BOLD:AAA8204  
Limnophyes minimus|BIOUG04090-F09|Kate Perez|BIN Taxonomy Match|BOLD:AAA8204  
Limnophyes minimus|BIOUG07805-D12|Kate Perez|BIN Taxonomy Match|BOLD:AAA8204  
Limnophyes minimus|BIOUG07756-A12|Kate Perez|BIN Taxonomy Match|BOLD:AAA8204  
Limnophyes minimus|BIOUG08258-A09|Kate Perez|BIN Taxonomy Match|BOLD:AAA8204  
Limnophyes minimus|ZSM-DIP-33140-F06|Caroline Chimento|BIN Taxonomy Match (Jan 2022)|BOLD ...  
Limnophyes minimus|ZSM-DIP-33149-C10|Caroline Chimento|BIN Taxonomy Match (Jan 2022)|BOLD ...  
Limnophyes minimus|BIOUG42741-B09|Kate Perez|BIN Taxonomy Match below Phylum (Jun 2019)|BOL...  
Limnophyes minimus|BIOUG42748-H02|Kate Perez|BIN Taxonomy Match below Phylum (Jun 2019)|BOL...  
Limnophyes minimus|BIOUG42746-H09|Kate Perez|BIN Taxonomy Match below Phylum (Jun 2019)|BOL...  
Limnophyes minimus|ZSM-DIP-33143-B12|Caroline Chimento|BIN Taxonomy Match (Jan 2022)|BOLD ...  
Limnophyes minimus|ZSM-DIP-33143-C01|Caroline Chimento|BIN Taxonomy Match (Jan 2022)|BOLD ...  
Limnophyes minimus|BIOUG15454-G04|Kate Perez|BIN Taxonomy Match|BOLD:AAA8204  
Limnophyes minimus|BIOUG15459-D02|Kate Perez|BIN Taxonomy Match|BOLD:AAA8204  
Limnophyes minimus|BIOUG42746-D04|Kate Perez|BIN Taxonomy Match below Phylum (Jun 2019)|BOL...  
Limnophyes minimus|ZSM-DIP-33135-H02|Caroline Chimento|BIN Taxonomy Match (Jan 2022)|BOLD ...  
Limnophyes minimus|ZSM-DIP-33130-H04|Caroline Chimento|BIN Taxonomy Match (Jan 2022)|BOLD ...  
Limnophyes minimus|ZSM-DIP-33137-C06|Caroline Chimento|BIN Taxonomy Match (Jan 2022)|BOLD ...  
Limnophyes minimus|BIOUG42965-E06|Kate Perez|BIN Taxonomy Match below Phylum (Jun 2019)|BOL...  
Limnophyes minimus|CH-OSF108|Elisabeth Stur|BOLD:AAA8204  
Limnophyes minimus|BIOUG16625-G12|Kate Perez|BIN Taxonomy Match|BOLD:AAA8204

Linnophyes minimus|BIOUG42965-E06|Kate Perez|BIN Taxonomy Match below Phylum (Jun 2019)|BOL...  
 Linnophyes minimus|CH-OSF108|Elisabeth Stur|BOLD:AAA8204  
 Linnophyes minimus|BIOUG16625-G12|Kate Perez|BIN Taxonomy Match|BOLD:AAA8204  
 Linnophyes minimus|BIOUG15895-E10|Kate Perez|BIN Taxonomy Match|BOLD:AAA8204  
 Linnophyes minimus|BIOUG15808-A02|Kate Perez|BIN Taxonomy Match|BOLD:AAA8204  
 Linnophyes minimus|BIOUG15895-A11|Kate Perez|BIN Taxonomy Match|BOLD:AAA8204  
 Linnophyes minimus|BIOUG16597-D06|Kate Perez|BIN Taxonomy Match|BOLD:AAA8204  
 Linnophyes minimus|BIOUG15454-B12|Kate Perez|BIN Taxonomy Match|BOLD:AAA8204  
 Linnophyes minimus|BIOUG17224-D03|Kate Perez|BIN Taxonomy Match|BOLD:AAA8204  
 Linnophyes minimus|BIOUG15538-H09|Kate Perez|BIN Taxonomy Match|BOLD:AAA8204  
 Linnophyes minimus|BIOUG15720-F11|Kate Perez|BIN Taxonomy Match|BOLD:AAA8204  
 Linnophyes minimus|BIOUG15719-A11|Kate Perez|BIN Taxonomy Match|BOLD:AAA8204  
 Linnophyes minimus|BIOUG15763-H04|Kate Perez|BIN Taxonomy Match|BOLD:AAA8204  
 Linnophyes minimus|BIOUG42754-D03|Kate Perez|BIN Taxonomy Match below Phylum (Jun 2019)|BOL...  
 Linnophyes minimus|BIOUG43074-E01|Kate Perez|BIN Taxonomy Match below Phylum (Jun 2019)|BOL...  
 Linnophyes minimus|ZSM-DIP-33135-F02|Caroline Chimento|BIN Taxonomy Match (Jan 2022)|BOLD ...  
 Linnophyes minimus|BIOUG42960-H08|Kate Perez|BIN Taxonomy Match below Phylum (Jun 2019)|BOL...  
 Linnophyes minimus|BIOUG42938-D11|Kate Perez|BIN Taxonomy Match below Phylum (Jun 2019)|BOL...  
 Linnophyes minimus|ZSM-DIP-33130-B05|Caroline Chimento|BIN Taxonomy Match (Jan 2022)|BOLD ...  
 Linnophyes minimus|ZSM-DIP-33131-G01|Caroline Chimento|BIN Taxonomy Match (Jan 2022)|BOLD ...  
 Linnophyes minimus|BIOUG42667-A10|Kate Perez|BIN Taxonomy Match below Phylum (Jun 2019)|BOL...  
 Linnophyes minimus|BIOUG55199-D11|Stefan Schmidt|BIN Taxonomy Match (Sep 2020)|BOLD:AAA8204  
 Linnophyes minimus|ZSM-DIP-33134-D05|Caroline Chimento|BIN Taxonomy Match (Jan 2022)|BOLD ...  
 Linnophyes minimus|ZSM-DIP-33142-C09|Caroline Chimento|BIN Taxonomy Match (Jan 2022)|BOLD ...  
 Linnophyes minimus|BIOUG42677-F04|Kate Perez|BIN Taxonomy Match below Phylum (Jun 2019)|BOL...  
 Linnophyes minimus|BIOUG42916-D10|Kate Perez|BIN Taxonomy Match below Phylum (Jun 2019)|BOL...  
 Linnophyes minimus|ZSM-DIP-33132-C08|Caroline Chimento|BIN Taxonomy Match (Jan 2022)|BOLD ...  
 Linnophyes minimus|BIOUG42653-F12|Kate Perez|BIN Taxonomy Match below Phylum (Jun 2019)|BOL...  
 Linnophyes minimus|Finmark297|Elisabeth Stur|BOLD:AAA8204  
 Linnophyes minimus|BIOUG42748-E10|Kate Perez|BIN Taxonomy Match below Phylum (Jun 2019)|BOL...  
 Linnophyes minimus|BIOUG42743-E06|Kate Perez|BIN Taxonomy Match below Phylum (Jun 2019)|BOL...  
 Linnophyes minimus|BIOUG07758-H06|Kate Perez|BIN Taxonomy Match|BOLD:AAA8204  
 Linnophyes minimus|ZSM-DIP-33143-A08|Caroline Chimento|BIN Taxonomy Match (Jan 2022)|BOLD ...  
 Linnophyes minimus|ZSM-DIP-33172-H09|Caroline Chimento|BIN Taxonomy Match (Jan 2022)|BOLD ...  
 Linnophyes minimus|BIOUG07805-C04|Kate Perez|BIN Taxonomy Match|BOLD:AAA8204  
 Linnophyes minimus|BIOUG05144-D07|Kate Perez|BIN Taxonomy Match|BOLD:AAA8204  
 Linnophyes minimus|BIOUG07753-G11|Kate Perez|BIN Taxonomy Match|BOLD:AAA8204  
 Linnophyes minimus|BIOUG05105-G09|Kate Perez|BIN Taxonomy Match|BOLD:AAA8204  
 Linnophyes minimus|BIOUG42755-C01|Kate Perez|BIN Taxonomy Match below Phylum (Jun 2019)|BOL...  
 Linnophyes minimus|BIOUG42654-F10|Kate Perez|BIN Taxonomy Match below Phylum (Jun 2019)|BOL...  
 Linnophyes minimus|ZSM-DIP-33131-F08|Caroline Chimento|BIN Taxonomy Match (Jan 2022)|BOLD ...  
 Linnophyes minimus|BIOUG07809-H03|Kate Perez|BIN Taxonomy Match|BOLD:AAA8204  
 Linnophyes minimus|BIOUG07809-H07|Kate Perez|BIN Taxonomy Match|BOLD:AAA8204  
 Chironomidae|BIOUG07809-D07|Meredith Miller|Tree-based Identification (Feb 2019)  
 Linnophyes minimus|BIOUG07809-B06|Kate Perez|BIN Taxonomy Match|BOLD:AAA8204  
 Linnophyes minimus|BIOUG07808-F05|Kate Perez|BIN Taxonomy Match|BOLD:AAA8204  
 Linnophyes minimus|BIOUG07806-E08|Kate Perez|BIN Taxonomy Match|BOLD:AAA8204  
 Linnophyes minimus|BIOUG07808-E07|Kate Perez|BIN Taxonomy Match|BOLD:AAA8204  
 Linnophyes minimus|BIOUG04155-F05|Kate Perez|BIN Taxonomy Match|BOLD:AAA8204  
 Linnophyes minimus|BIOUG07809-A09|Kate Perez|BIN Taxonomy Match|BOLD:AAA8204  
 Linnophyes minimus|BIOUG05944-F07|Kate Perez|BIN Taxonomy Match|BOLD:AAA8204  
 Linnophyes minimus|BIOUG15719-D03|Kate Perez|BIN Taxonomy Match|BOLD:AAA8204  
 Linnophyes minimus|ZSM-DIP-33137-E03|Caroline Chimento|BIN Taxonomy Match (Jan 2022)|BOLD ...  
 Linnophyes minimus|ZSM-DIP-33141-D01|Caroline Chimento|BIN Taxonomy Match (Jan 2022)|BOLD ...  
 Linnophyes minimus|BIOUG42741-D05|Kate Perez|BIN Taxonomy Match below Phylum (Jun 2019)|BOL...  
 Linnophyes minimus|BIOUG42656-A08|Kate Perez|BIN Taxonomy Match below Phylum (Jun 2019)|BOL...  
 Linnophyes minimus|BIOUG07754-B04|Kate Perez|BIN Taxonomy Match|BOLD:AAA8204  
 Linnophyes minimus|CCDB21606-F04|Sofia Wiedenbrug|BOLD:AAA8204  
 Linnophyes minimus|CCDB21606-F02|Sofia Wiedenbrug|BOLD:AAA8204  
 Linnophyes minimus|BIOUG36653-H08|Kate Perez|BIN Taxonomy Match (Jul 2018)|BOLD:AAA8204  
 Linnophyes minimus|BIOUG36676-F06|Kate Perez|BIN Taxonomy Match (Jul 2018)|BOLD:AAA8204  
 Linnophyes minimus|BIOUG36678-A06|Kate Perez|BIN Taxonomy Match (Jul 2018)|BOLD:AAA8204  
 Linnophyes minimus|BIOUG36677-B07|Kate Perez|BIN Taxonomy Match (May 2018)|BOLD:AAA8204  
 Linnophyes minimus|BIOUG36676-E06|Kate Perez|BIN Taxonomy Match (Jul 2018)|BOLD:AAA8204  
 Linnophyes minimus|BIOUG36733-D02|Kate Perez|BIN Taxonomy Match (May 2018)|BOLD:AAA8204  
 Linnophyes minimus|Finmark495|Elisabeth Stur|BOLD:AAA8204  
 Linnophyes minimus|BIOUG15794-E10|Kate Perez|BIN Taxonomy Match|BOLD:AAA8204  
 Linnophyes minimus|Finmark628|Elisabeth Stur|BOLD:AAA8204  
 Linnophyes|24373-G10|Mikko J Tiisanen|Tree based identification|BOLD:ACU5176  
 Linnophyes|24464-B08|Mikko J Tiisanen|Tree based identification|BOLD:ACU5176  
 Linnophyes|24372-C12|Mikko J Tiisanen|Tree based identification|BOLD:ACU5176  
 Linnophyes|24465-F09|Mikko J Tiisanen|Tree based identification|BOLD:ACU5176  
 Linnophyes|24372-B03|Mikko J Tiisanen|Tree based identification|BOLD:ACU5176  
 Linnophyes|24372-D05|Mikko J Tiisanen|Tree based identification|BOLD:ACU5176  
 Linnophyes|24464-C05|Mikko J Tiisanen|Tree based identification|BOLD:ACU5176  
 Linnophyes|24501-E12|Mikko J Tiisanen|Tree based identification|BOLD:ACU5176  
 Linnophyes natalensis|Finmark411|Elisabeth Stur|BOLD:AAT9715  
 Linnophyes minimus|Finmark92|Elisabeth Stur|BOLD:AAM5218  
 Linnophyes minimus|Finmark88|Elisabeth Stur|BOLD:AAM5218  
 Chironomidae|BIOUG07808-A04|Meredith Miller|Tree-based Identification (Feb 2019)  
 Chironomidae|BIOUG07809-A06|Meredith Miller|Digital Morphology (Feb 2019)  
 Linnophyes|BIOUG05395-H05|Kate Perez|BIN Taxonomy Match|BOLD:ACJ3327  
 Linnophyes|BIOUG08097-D11|Kate Perez|BIN Taxonomy Match|BOLD:ACJ3327  
 Linnophyes|BIOUG08129-C04|Kate Perez|BIN Taxonomy Match|BOLD:ACJ3327  
 Linnophyes|BIOUG08098-B08|Kate Perez|BIN Taxonomy Match|BOLD:ACJ3327  
 Linnophyes|BIOUG06052-E07|Kate Perez|BIN Taxonomy Match|BOLD:ACJ3327  
 Linnophyes natalensis|ATNA495|Elisabeth Stur|BOLD:AAB7361  
 Linnophyes natalensis|ATNA253|Elisabeth Stur|BOLD:AAB7361  
 Linnophyes natalensis|SOE111  
 Linnophyes natalensis|24528-G12|Kate Perez|BIN Taxonomy Match|BOLD:ACT1270  
 Linnophyes natalensis|CCDB24183-H09|Sofia Wiedenbrug|Morphology  
 Linnophyes natalensis|CCDB21605-F06|Sofia Wiedenbrug|BOLD:ACT1270  
 Linnophyes|Finmark257|Elisabeth Stur  
 Linnophyes natalensis|ZSM-DIP-33136-E12|Caroline Chimento|BIN Taxonomy Match (Jan 2022)|BOLD...  
 Linnophyes natalensis|TRD-CH17|Elisabeth Stur|BOLD:AAB7361  
 Linnophyes natalensis|SOE155|Elisabeth Stur|BOLD:AAB7361  
 Linnophyes natalensis|SOE191|Elisabeth Stur|BOLD:AAB7361  
 Linnophyes natalensis|SOE195|Elisabeth Stur|BOLD:AAB7361  
 Linnophyes natalensis|ATNA307|Elisabeth Stur|BOLD:AAB7361  
 Linnophyes natalensis|TRD-CH56|Elisabeth Stur|BOLD:AAB7361  
 Linnophyes natalensis|CH-eik67|Elisabeth Stur|BOLD:AAB7361  
 Linnophyes natalensis|ZSM-DIP-33141-H09|Caroline Chimento|BIN Taxonomy Match (Jan 2022)|BOLD...  
 Linnophyes natalensis|ZSM-DIP-33131-F07|Caroline Chimento|BIN Taxonomy Match (Jan 2022)|BOLD...

- └─┬─ Linnophyes natalensis[CH-eik67]Elisabeth Stur|BOLD:AAB7361
- └─┬─ Linnophyes natalensis[ZSM-DIP-33141-H09]Caroline Chimento|BIN Taxonomy Match (Jan 2022)|BOLD...
- └─┬─ Linnophyes natalensis[ZSM-DIP-33131-H07]Caroline Chimento|BIN Taxonomy Match (Jan 2022)|BOLD...
- └─┬─ Linnophyes natalensis[BIOUG05149-E01]Kate Perez|BIN Taxonomy Match|BOLD:AAB7361
- └─┬─ Linnophyes natalensis[CCDB21605-F07]Sofia Wiedenbrug|BOLD:AAB7361
- └─┬─ Linnophyes natalensis[SOE180]Elisabeth Stur|BOLD:AAB7361
- └─┬─ Linnophyes natalensis[ATNA496]Elisabeth Stur|BOLD:AAB7361
- └─┬─ Linnophyes natalensis[Finnmark612]Elisabeth Stur|BOLD:AAB7361
- └─┬─ Linnophyes natalensis[SOE469]Elisabeth Stur|BOLD:AAB7361
- └─┬─ Linnophyes natalensis[ATNA263]Elisabeth Stur|BOLD:AAB7361
- └─┬─ Linnophyes natalensis[ZMUO.024679]Lauri Paasivirta|BOLD:AAB7361
- └─┬─ Linnophyes natalensis[ZSM-DIP-33141-G07]Caroline Chimento|BIN Taxonomy Match (Jan 2022)|BOLD...
- └─┬─ Linnophyes natalensis[ZSM-DIP-33134-F12]Caroline Chimento|BIN Taxonomy Match (Jan 2022)|BOLD...
- └─┬─ Linnophyes natalensis[ZSM-DIP-33134-F10]Caroline Chimento|BIN Taxonomy Match (Jan 2022)|BOLD...
- └─┬─ Linnophyes natalensis[SOE198]Elisabeth Stur|BOLD:AAB7361
- └─┬─ Linnophyes natalensis[ZSM-DIP-33172-A06]Caroline Chimento|BIN Taxonomy Match (Jan 2022)|BOLD...
- └─┬─ Linnophyes natalensis[SOE481]Elisabeth Stur|BOLD:AAB7361
- └─┬─ Linnophyes natalensis[ZMUO.024678]Lauri Paasivirta|BOLD:AAB7361
- └─┬─ Linnophyes natalensis[TRD-CH19]Elisabeth Stur|BOLD:AAB7361
- └─┬─ Linnophyes natalensis[ZSM-DIP-33143-D10]Caroline Chimento|BIN Taxonomy Match (Jan 2022)|BOLD...
- └─┬─ Linnophyes natalensis[CH-eik07]Elisabeth Stur|BOLD:AAB7361
- └─┬─ Linnophyes natalensis[SOE480]Elisabeth Stur
- └─┬─ Linnophyes natalensis[SOE467]Elisabeth Stur
- └─┬─ Linnophyes natalensis[SOE479]Elisabeth Stur
- └─┬─ Linnophyes natalensis[SOE477]Elisabeth Stur
- └─┬─ Linnophyes natalensis[SOE422]Elisabeth Stur
- └─┬─ Linnophyes natalensis[Finnmark320]Elisabeth Stur|BOLD:AAB7361
- └─┬─ Linnophyes[ZSM-DIP-33148-B10]Caroline Chimento|BIN Taxonomy Match (Jan 2022)|BOLD:ACO9143
- └─┬─ Linnophyes[ZSM-DIP-33131-D05]Caroline Chimento|BIN Taxonomy Match (Jan 2022)|BOLD:ACO9143
- └─┬─ Linnophyes[CCDB24228-H03]Sofia Wiedenbrug|BIN Taxonomy Match|BOLD:ACO9143
- └─┬─ Linnophyes[CCDB24039-C01]Sofia Wiedenbrug|BIN Taxonomy Match|BOLD:ACO9143
- └─┬─ Linnophyes sp. 2ES|SOE192|Elisabeth Stur|BOLD:AAJ2170
- └─┬─ Linnophyes sp. 2ES|SOE351|Elisabeth Stur|BOLD:AAJ2170
- └─┬─ Linnophyes[BIOUG16333-B06]Kate Perez|BIN Taxonomy Match|BOLD:AAJ2170
- └─┬─ Linnophyes[BIOUG55197-C12]Stefan Schmidt|BIN Taxonomy Match (Sep 2020)|BOLD:ABU5525
- └─┬─ Linnophyes[BIOUG42745-A08]Kate Perez|BIN Taxonomy Match below Phylum (Jun 2019)|BOLD:ABU...
- └─┬─ Linnophyes[BIOUG42952-F08]Kate Perez|BIN Taxonomy Match below Phylum (Jun 2019)|BOLD:ABU...
- └─┬─ Linnophyes[BIOUG55126-B03]Stefan Schmidt|BIN Taxonomy Match (Sep 2020)|BOLD:ABU5525
- └─┬─ Linnophyes[BIOUG42760-B04]Kate Perez|BIN Taxonomy Match below Phylum (Jun 2019)|BOLD:ABU...
- └─┬─ Linnophyes[BIOUG42763-C09]Kate Perez|BIN Taxonomy Match below Phylum (Jun 2019)|BOLD:ABU...
- └─┬─ Linnophyes sp. 14ES|BIOUG16478-C07|Kate Perez|BIN Taxonomy Match|BOLD:ABU5525
- └─┬─ Linnophyes sp. 14ES|BIOUG16396-B02|Kate Perez|BIN Taxonomy Match|BOLD:ABU5525
- └─┬─ Linnophyes sp. 14ES|CH-eik17|Elisabeth Stur|BOLD:ABU5525
- └─┬─ Linnophyes[BIOUG42739-C08]Kate Perez|BIN Taxonomy Match below Phylum (Jun 2019)|BOLD:ABU...
- └─┬─ Linnophyes[BIOUG42667-F08]Kate Perez|BIN Taxonomy Match below Phylum (Jun 2019)|BOLD:ABU...
- └─┬─ Linnophyes[BIOUG42701-E04]Kate Perez|BIN Taxonomy Match below Phylum (Jun 2019)|BOLD:ABU...
- └─┬─ Linnophyes[BIOUG42918-A03]Kate Perez|BIN Taxonomy Match below Phylum (Jun 2019)|BOLD:ABU...
- └─┬─ Linnophyes sp. 14ES|BIOUG15895-F03|Kate Perez|BIN Taxonomy Match|BOLD:ABU5525
- └─┬─ Linnophyes sp. 14ES|CH-eik12|Elisabeth Stur|BOLD:ABU5525
- └─┬─ Linnophyes sp. 14ES|BIOUG16333-C06|Kate Perez|BIN Taxonomy Match|BOLD:ABU5525
- └─┬─ Linnophyes sp. 14ES|BIOUG15539-G09|Kate Perez|BIN Taxonomy Match|BOLD:ABU5525
- └─┬─ Linnophyes[BIOUG55188-C08]Stefan Schmidt|BIN Taxonomy Match (Sep 2020)|BOLD:ABU5525
- └─┬─ Linnophyes[BIOUG55196-C12]Stefan Schmidt|BIN Taxonomy Match (Sep 2020)|BOLD:ABU5525
- └─┬─ Linnophyes[BIOUG55190-H02]Stefan Schmidt|BIN Taxonomy Match (Sep 2020)|BOLD:ABU5525
- └─┬─ Linnophyes[BIOUG55414-A01]Stefan Schmidt|BIN Taxonomy Match (Sep 2020)|BOLD:ABU5525
- └─┬─ Linnophyes[BIOUG55190-H09]Stefan Schmidt|BIN Taxonomy Match (Sep 2020)|BOLD:ABU5525
- └─┬─ Linnophyes[BIOUG55414-A05]Stefan Schmidt|BIN Taxonomy Match (Sep 2020)|BOLD:ABU5525
- └─┬─ Linnophyes[BIOUG55124-C04]Stefan Schmidt|BIN Taxonomy Match (Sep 2020)|BOLD:ABU5525
- └─┬─ Linnophyes[BIOUG55423-G01]Stefan Schmidt|BIN Taxonomy Match (Sep 2020)|BOLD:ABU5525
- └─┬─ Linnophyes[BIOUG55426-E02]Stefan Schmidt|BIN Taxonomy Match (Sep 2020)|BOLD:ABU5525
- └─┬─ Linnophyes[BIOUG55426-C04]Stefan Schmidt|BIN Taxonomy Match (Sep 2020)|BOLD:ABU5525
- └─┬─ Linnophyes[BIOUG55427-B11]Stefan Schmidt|BIN Taxonomy Match (Sep 2020)|BOLD:ABU5525
- └─┬─ Linnophyes[BIOUG55427-A06]Stefan Schmidt|BIN Taxonomy Match (Sep 2020)|BOLD:ABU5525
- └─┬─ Linnophyes[BIOUG55436-F05]Stefan Schmidt|BIN Taxonomy Match (Sep 2020)|BOLD:ABU5525
- └─┬─ Linnophyes[BIOUG55436-B02]Stefan Schmidt|BIN Taxonomy Match (Sep 2020)|BOLD:ABU5525
- └─┬─ Linnophyes[BIOUG55150-D06]Stefan Schmidt|BIN Taxonomy Match (Sep 2020)|BOLD:ABU5525
- └─┬─ Linnophyes[BIOUG42707-G12]Kate Perez|BIN Taxonomy Match below Phylum (Jun 2019)|BOLD:ABU...
- └─┬─ Linnophyes[BIOUG42735-F09]Kate Perez|BIN Taxonomy Match below Phylum (Jun 2019)|BOLD:ABU...
- └─┬─ Linnophyes[BIOUG55165-D03]Stefan Schmidt|BIN Taxonomy Match (Sep 2020)|BOLD:ABU5525
- └─┬─ Linnophyes[BIOUG42914-D07]Kate Perez|BIN Taxonomy Match below Phylum (Jun 2019)|BOLD:ABU...
- └─┬─ Linnophyes[BIOUG42951-G11]Kate Perez|BIN Taxonomy Match below Phylum (Jun 2019)|BOLD:ABU...
- └─┬─ Linnophyes[BIOUG42685-D11]Kate Perez|BIN Taxonomy Match below Phylum (Jun 2019)|BOLD:ABU...
- └─┬─ Linnophyes[BIOUG43074-B07]Kate Perez|BIN Taxonomy Match below Phylum (Jun 2019)|BOLD:ABU...
- └─┬─ Linnophyes[BIOUG55127-B07]Stefan Schmidt|BIN Taxonomy Match (Sep 2020)|BOLD:ABU5525
- └─┬─ Linnophyes[BIOUG55126-F07]Stefan Schmidt|BIN Taxonomy Match (Sep 2020)|BOLD:ABU5525
- └─┬─ Linnophyes[BIOUG55124-G06]Stefan Schmidt|BIN Taxonomy Match (Sep 2020)|BOLD:ABU5525
- └─┬─ Linnophyes[BIOUG55120-E02]Stefan Schmidt|BIN Taxonomy Match (Sep 2020)|BOLD:ABU5525
- └─┬─ Linnophyes[BIOUG55119-H04]Stefan Schmidt|BIN Taxonomy Match (Sep 2020)|BOLD:ABU5525
- └─┬─ Linnophyes[BIOUG43078-A10]Kate Perez|BIN Taxonomy Match below Phylum (Jun 2019)|BOLD:ABU...
- └─┬─ Linnophyes[BIOUG43078-A03]Kate Perez|BIN Taxonomy Match below Phylum (Jun 2019)|BOLD:ABU...
- └─┬─ Linnophyes[BIOUG55421-H06]Stefan Schmidt|BIN Taxonomy Match (Sep 2020)|BOLD:ABU5525
- └─┬─ Linnophyes[BIOUG54164-G06]Stefan Schmidt|BIN Taxonomy Match (Sep 2020)|BOLD:ABU5525
- └─┬─ Linnophyes[BIOUG42674-D04]Kate Perez|BIN Taxonomy Match below Phylum (Jun 2019)|BOLD:ABU...
- └─┬─ Linnophyes[BIOUG55200-E05]Stefan Schmidt|BIN Taxonomy Match (Sep 2020)|BOLD:ABU5525
- └─┬─ Linnophyes[BIOUG42966-D08]Kate Perez|BIN Taxonomy Match below Phylum (Jun 2019)|BOLD:ABU...
- └─┬─ Linnophyes[BIOUG55200-B05]Stefan Schmidt|BIN Taxonomy Match (Sep 2020)|BOLD:ABU5525
- └─┬─ Linnophyes[BIOUG55199-G12]Stefan Schmidt|BIN Taxonomy Match (Sep 2020)|BOLD:ABU5525
- └─┬─ Linnophyes[BIOUG55198-B09]Stefan Schmidt|BIN Taxonomy Match (Sep 2020)|BOLD:ABU5525
- └─┬─ Linnophyes[BIOUG42668-D02]Kate Perez|BIN Taxonomy Match below Phylum (Jun 2019)|BOLD:ABU...
- └─┬─ Linnophyes[BIOUG55197-H02]Stefan Schmidt|BIN Taxonomy Match (Sep 2020)|BOLD:ABU5525
- └─┬─ Linnophyes[BIOUG55197-D10]Stefan Schmidt|BIN Taxonomy Match (Sep 2020)|BOLD:ABU5525
- └─┬─ Linnophyes[BIOUG55197-B10]Stefan Schmidt|BIN Taxonomy Match (Sep 2020)|BOLD:ABU5525
- └─┬─ Linnophyes[BIOUG55197-A08]Stefan Schmidt|BIN Taxonomy Match (Sep 2020)|BOLD:ABU5525
- └─┬─ Linnophyes[BIOUG55196-E06]Stefan Schmidt|BIN Taxonomy Match (Sep 2020)|BOLD:ABU5525
- └─┬─ Linnophyes[BIOUG55195-G02]Stefan Schmidt|BIN Taxonomy Match (Sep 2020)|BOLD:ABU5525
- └─┬─ Linnophyes[BIOUG42673-D05]Kate Perez|BIN Taxonomy Match below Phylum (Jun 2019)|BOLD:ABU...
- └─┬─ Linnophyes[BIOUG55200-F08]Stefan Schmidt|BIN Taxonomy Match (Sep 2020)|BOLD:ABU5525
- └─┬─ Linnophyes[BIOUG42959-D09]Kate Perez|BIN Taxonomy Match below Phylum (Jun 2019)|BOLD:ABU...
- └─┬─ Linnophyes[BIOUG55192-G07]Stefan Schmidt|BIN Taxonomy Match (Sep 2020)|BOLD:ABU5525
- └─┬─ Linnophyes[BIOUG55413-C09]Stefan Schmidt|BIN Taxonomy Match (Sep 2020)|BOLD:ABU5525
- └─┬─ Linnophyes[BIOUG42659-B07]Kate Perez|BIN Taxonomy Match below Phylum (Jun 2019)|BOLD:ABU...
- └─┬─ Linnophyes[BIOUG42945-C06]Kate Perez|BIN Taxonomy Match below Phylum (Jun 2019)|BOLD:ABU...
- └─┬─ Linnophyes[BIOUG55163-B06]Kate Perez|BIN Taxonomy Match (Sep 2020)|BOLD:ABU5525



Linnophyes|BIOUG42704-C10|Kate Perez|BIN Taxonomy Match below Phylum (Jun 2019)|BOLD:ABU...  
 Linnophyes|BIOUG42967-F04|Kate Perez|BIN Taxonomy Match below Phylum (Jun 2019)|BOLD:ABU...  
 Linnophyes|BIOUG42939-C06|Kate Perez|BIN Taxonomy Match below Phylum (Jun 2019)|BOLD:ABU...  
 Linnophyes|BIOUG42671-B02|Kate Perez|BIN Taxonomy Match below Phylum (Jun 2019)|BOLD:ABU...  
 Linnophyes|BIOUG42943-F10|Kate Perez|BIN Taxonomy Match below Phylum (Jun 2019)|BOLD:ABU...  
 Linnophyes|BIOUG42970-D12|Kate Perez|BIN Taxonomy Match below Phylum (Jun 2019)|BOLD:ABU...  
 Linnophyes|BIOUG42948-F09|Kate Perez|BIN Taxonomy Match below Phylum (Jun 2019)|BOLD:ABU...  
 Linnophyes|BIOUG42941-E12|Kate Perez|BIN Taxonomy Match below Phylum (Jun 2019)|BOLD:ABU...  
 Linnophyes|BIOUG42706-B07|Kate Perez|BIN Taxonomy Match below Phylum (Jun 2019)|BOLD:ABU...  
 Linnophyes|BIOUG55416-E05|Stefan Schmidt|BIN Taxonomy Match (Sep 2020)|BOLD:ABU5525  
 Linnophyes sp. 14ES|BIOUG15948-F10|Kate Perez|BIN Taxonomy Match|BOLD:ABU5525  
 Linnophyes|BIOUG55416-E09|Stefan Schmidt|BIN Taxonomy Match (Sep 2020)|BOLD:ABU5525  
 Linnophyes|BIOUG55436-F09|Stefan Schmidt|BIN Taxonomy Match (Sep 2020)|BOLD:ABU5525  
 Linnophyes|BIOUG42748-H10|Kate Perez|BIN Taxonomy Match below Phylum (Jun 2019)|BOLD:ABU...  
 Linnophyes|BIOUG42278-H09|Kate Perez|BIN Taxonomy Match below Phylum (Jun 2019)|BOLD:ABU...  
 Linnophyes|BIOUG42676-G07|Kate Perez|BIN Taxonomy Match below Phylum (Jun 2019)|BOLD:ABU...  
 Linnophyes|BIOUG42941-H10|Kate Perez|BIN Taxonomy Match below Phylum (Jun 2019)|BOLD:ABU...  
 Linnophyes|BIOUG42955-C06|Kate Perez|BIN Taxonomy Match below Phylum (Jun 2019)|BOLD:ABU...  
 Linnophyes|BIOUG42927-G05|Kate Perez|BIN Taxonomy Match below Phylum (Jun 2019)|BOLD:ABU...  
 Linnophyes|BIOUG42943-C06|Kate Perez|BIN Taxonomy Match below Phylum (Jun 2019)|BOLD:ABU...  
 Linnophyes sp. 14ES|BIOUG17064-G05|Kate Perez|BIN Taxonomy Match|BOLD:ABU5525  
 Linnophyes sp. 14ES|BIOUG15797-C03|Kate Perez|BIN Taxonomy Match|BOLD:ABU5525  
 Linnophyes|BIOUG42946-G12|Kate Perez|BIN Taxonomy Match below Phylum (Jun 2019)|BOLD:ABU...  
 Linnophyes|BIOUG42670-H11|Kate Perez|BIN Taxonomy Match below Phylum (Jun 2019)|BOLD:ABU...  
 Linnophyes sp. 14ES|BIOUG16776-E10|Kate Perez|BIN Taxonomy Match|BOLD:ABU5525  
 Linnophyes sp. 14ES|BIOUG16354-E05|Kate Perez|BIN Taxonomy Match|BOLD:ABU5525  
 Linnophyes sp. 14ES|BIOUG16552-C10|Kate Perez|BIN Taxonomy Match|BOLD:ABU5525  
 Linnophyes sp. 14ES|BIOUG15948-E03|Kate Perez|BIN Taxonomy Match|BOLD:ABU5525  
 Linnophyes NHRS sp. A|NHRS-BYWS00000339|Yngve Brodin|morphology|BOLD:ADJ7032  
 Linnophyes|BIOUG16354-E12|Kate Perez|BOLD ID Engine Manual|BOLD:ACR0830  
 Linnophyes|BIOUG16529-A12|Kate Perez|BOLD ID Engine Manual|BOLD:ACR0830  
 Linnophyes|ZSM-DIP-33172-A08|Caroline Chimeno|BIN Taxonomy Match (Jan 2022)|BOLD:AAB1806  
 Linnophyes|ZSM-DIP-33170-G07|Caroline Chimeno|BIN Taxonomy Match (Jan 2022)|BOLD:AAB1806  
 Linnophyes|ZSM-DIP-33170-G06|Caroline Chimeno|BIN Taxonomy Match (Jan 2022)|BOLD:AAB1806  
 Linnophyes|ZSM-DIP-33148-C10|Caroline Chimeno|BIN Taxonomy Match (Jan 2022)|BOLD:AAB1806  
 Linnophyes|ZSM-DIP-33172-A10|Caroline Chimeno|BIN Taxonomy Match (Jan 2022)|BOLD:AAB1806  
 Linnophyes|ZSM-DIP-33130-E08|Caroline Chimeno|BIN Taxonomy Match (Jan 2022)|BOLD:AAB1806  
 Linnophyes NHRS sp. B|NHRS-BYWS00000451|Yngve Brodin|morphology|BOLD:AAB1806  
 Linnophyes sp. 3ES|SOE234|Elisabeth Stur|BOLD:AAB1806  
 Linnophyes sp. 3ES|SOE350|Elisabeth Stur|BOLD:AAB1806  
 Linnophyes sp. 3ES|SOE448|Elisabeth Stur|BOLD:AAB1806  
 Linnophyes sp. 3ES|SOE236|Elisabeth Stur|BOLD:AAB1806  
 Linnophyes sp. 3ES|CH-eik100|Elisabeth Stur|BOLD:AAB1806  
 Linnophyes sp. 3ES|SOE470|Elisabeth Stur|BOLD:AAB1806  
 Linnophyes sp. 3ES|SOE454|Elisabeth Stur|BOLD:AAB1806  
 Linnophyes sp. 3ES|SOE58|Elisabeth Stur|BOLD:AAB1806  
 Linnophyes sp. 3ES|SOE142|Elisabeth Stur|BOLD:AAB1806  
 Linnophyes sp. 3ES|SOE311|Elisabeth Stur|BOLD:AAB1806  
 Linnophyes sp. 3ES|SOE326|Elisabeth Stur|BOLD:AAB1806  
 Linnophyes sp. 3ES|SOE451|Elisabeth Stur|BOLD:AAB1806  
 Linnophyes sp. 3ES|SOE482|Elisabeth Stur|BOLD:AAB1806  
 Linnophyes sp. 3ES|SOE447|Elisabeth Stur|BOLD:AAB1806  
 Linnophyes sp. 8ES|CCDB22605-D09|Sofia Wiedenbrug|BOLD:AAW1297  
 Linnophyes sp. 8ES|ZSM-DIP-33138-H07|Caroline Chimeno|BIN Taxonomy Match (Jan 2022)|BOLD ...  
 Linnophyes sp. 8ES|ZSM-DIP-33137-E02|Caroline Chimeno|BIN Taxonomy Match (Jan 2022)|BOLD ...  
 Linnophyes|ZSM-DIP-33135-F01|Caroline Chimeno|BIN Taxonomy Match (Jan 2022)|BOLD:AAW1297  
 Linnophyes|BIOUG42677-F01|Kate Perez|BIN Taxonomy Match below Phylum (Jun 2019)|BOLD:AAW...  
 Linnophyes|BIOUG42750-C04|Kate Perez|BIN Taxonomy Match below Phylum (Jun 2019)|BOLD:AAW...  
 Linnophyes sp. 8ES|ZSM-DIP-33136-D04|Caroline Chimeno|BIN Taxonomy Match (Jan 2022)|BOLD ...  
 Linnophyes|ZSM-DIP-33136-C12|Caroline Chimeno|BIN Taxonomy Match (Jan 2022)|BOLD:AAW1297  
 Linnophyes sp. 8ES|ZSM-DIP-33136-C06|Caroline Chimeno|BIN Taxonomy Match (Jan 2022)|BOLD ...  
 Linnophyes sp. 8ES|ZSM-DIP-33131-H05|Caroline Chimeno|BIN Taxonomy Match (Jan 2022)|BOLD ...  
 Linnophyes sp. 8ES|ZSM-DIP-33131-H06|Caroline Chimeno|BIN Taxonomy Match (Jan 2022)|BOLD ...  
 Linnophyes|BIOUG55428-F07|Stefan Schmidt|BIN Taxonomy Match (Sep 2020)|BOLD:AAW1297  
 Linnophyes|BIOUG42667-B09|Kate Perez|BIN Taxonomy Match below Phylum (Jun 2019)|BOLD:AAW...  
 Linnophyes|BIOUG42927-B06|Kate Perez|BIN Taxonomy Match below Phylum (Jun 2019)|BOLD:AAW...  
 Linnophyes sp. 8ES|BIOUG05107-A12|Kate Perez|BIN Taxonomy Match|BOLD:AAW1297  
 Linnophyes|ZSM-DIP-33137-E09|Caroline Chimeno|BIN Taxonomy Match (Jan 2022)|BOLD:AAW1297  
 Linnophyes sp. 8ES|ZSM-DIP-33138-H06|Caroline Chimeno|BIN Taxonomy Match (Jan 2022)|BOLD ...  
 Linnophyes|ZSM-DIP-33137-E01|Caroline Chimeno|BIN Taxonomy Match (Jan 2022)|BOLD:AAW1297  
 Linnophyes|ZSM-DIP-33136-C11|Caroline Chimeno|BIN Taxonomy Match (Jan 2022)|BOLD:AAW1297  
 Linnophyes|ZSM-DIP-33136-C07|Caroline Chimeno|BIN Taxonomy Match (Jan 2022)|BOLD:AAW1297  
 Linnophyes|BIOUG42709-B10|Kate Perez|BIN Taxonomy Match below Phylum (Jun 2019)|BOLD:AAW...  
 Linnophyes sp. 8ES|ZSM-DIP-33137-D08|Caroline Chimeno|BIN Taxonomy Match (Jan 2022)|BOLD ...  
 Linnophyes sp. 8ES|ZSM-DIP-33141-H06|Caroline Chimeno|BIN Taxonomy Match (Jan 2022)|BOLD ...  
 Linnophyes|ZSM-DIP-33136-C10|Caroline Chimeno|BIN Taxonomy Match (Jan 2022)|BOLD:AAW1297  
 Linnophyes sp. 8ES|ZSM-DIP-33136-D03|Caroline Chimeno|BIN Taxonomy Match (Jan 2022)|BOLD ...  
 Linnophyes|ZSM-DIP-33136-D05|Caroline Chimeno|BIN Taxonomy Match (Jan 2022)|BOLD:AAW1297  
 Linnophyes sp. 8ES|ZSM-DIP-33136-F02|Caroline Chimeno|BIN Taxonomy Match (Jan 2022)|BOLD ...  
 Linnophyes sp. 8ES|ZSM-DIP-33136-F12|Caroline Chimeno|BIN Taxonomy Match (Jan 2022)|BOLD ...  
 Linnophyes|ZSM-DIP-33137-E05|Caroline Chimeno|BIN Taxonomy Match (Jan 2022)|BOLD:AAW1297  
 Linnophyes|BIOUG42946-C11|Kate Perez|BIN Taxonomy Match below Phylum (Jun 2019)|BOLD:AAW...  
 Linnophyes|BIOUG42679-C11|Kate Perez|BIN Taxonomy Match below Phylum (Jun 2019)|BOLD:AAW...  
 Linnophyes|ZSM-DIP-33135-F11|Caroline Chimeno|BIN Taxonomy Match (Jan 2022)|BOLD:AAW1297  
 Linnophyes sp. 8ES|ZSM-DIP-33130-C05|Caroline Chimeno|BIN Taxonomy Match (Jan 2022)|BOLD ...  
 Linnophyes sp. 8ES|BIOUG05103-F10|Kate Perez|BIN Taxonomy Match|BOLD:AAW1297  
 Linnophyes sp. 8ES|BIOUG06095-F10|Kate Perez|BIN Taxonomy Match|BOLD:AAW1297  
 Linnophyes sp. 8ES|CH-OSF55|Elisabeth Stur|BOLD:AAW1297  
 Linnophyes sp. 8ES|BIOUG05947-F05|Kate Perez|BIN Taxonomy Match|BOLD:AAW1297  
 Linnophyes sp. 8ES|BIOUG07407-D12|Kate Perez|BIN Taxonomy Match|BOLD:AAW1297  
 Linnophyes sp. 8ES|BIOUG07405-F10|Kate Perez|BIN Taxonomy Match|BOLD:AAW1297  
 Linnophyes sp. 8ES|ZSM-DIP-33131-H10|Caroline Chimeno|BIN Taxonomy Match (Jan 2022)|BOLD ...  
 Linnophyes sp. 8ES|BIOUG07755-C03|Kate Perez|BIN Taxonomy Match|BOLD:AAW1297  
 Linnophyes sp. 8ES|BIOUG06209-G09|Kate Perez|BIN Taxonomy Match|BOLD:AAW1297  
 Chironomidae|BIOUG04269-A03|Kate Perez|BIN Taxonomy Match|BOLD:ACC1276  
 Linnophyes sp. 2SW|BIOUG07566-A09|Sofia Wiedenbrug|BOLD:ACG4398  
 Linnophyes sp. 2SW|BIOUG07808-B01|Sofia Wiedenbrug|BIN Taxonomy Match|BOLD:ACG4398  
 Linnophyes sp. 2SW|BIOUG07809-F10|Sofia Wiedenbrug|BIN Taxonomy Match|BOLD:ACG4398  
 Linnophyes sp. 2SW|BIOUG07808-F11|Sofia Wiedenbrug|BIN Taxonomy Match|BOLD:ACG4398  
 Linnophyes sp. 2SW|BIOUG07566-E10|Sofia Wiedenbrug|BOLD:ACG4398  
 Linnophyes sp. 2SW|BIOUG07568-G02|Sofia Wiedenbrug|BOLD:ACG4398  
 Linnophyes sp. 2SW|BIOUG07568-C11|Sofia Wiedenbrug|BOLD:ACG4398  
 Linnophyes sp. 2SW|BIOUG07407-A11|Sofia Wiedenbrug|BOLD:ACG4398



Limnophyes sp. 2SW|BIOUG07568-G02|Sofia Wiedenbrug||BOLD:ACG4398  
Limnophyes sp. 2SW|BIOUG07568-C11|Sofia Wiedenbrug||BOLD:ACG4398  
Limnophyes sp. 2SW|BIOUG07407-A11|Sofia Wiedenbrug||BOLD:ACG4398  
Limnophyes sp. 2SW|BIOUG07810-D09|Sofia Wiedenbrug||BOLD:ACG4398  
Limnophyes sp. 2SW|BIOUG07929-G10|Sofia Wiedenbrug||BOLD:ACG4398  
Limnophyes sp. 2SW|BIOUG07410-H04|Sofia Wiedenbrug||BOLD:ACG4398  
Limnophyes sp. 2SW|BIOUG07930-C10|Sofia Wiedenbrug||BOLD:ACG4398  
Limnophyes sp. 2SW|BIOUG06280-G08|Sofia Wiedenbrug||BOLD:ACG4398  
Limnophyes sp. 2SW|BIOUG08135-G04|Sofia Wiedenbrug||BOLD:ACG4398  
Limnophyes sp. 2SW|BIOUG08174-B11|Sofia Wiedenbrug||BOLD:ACG4398  
Limnophyes sp. 2SW|BIOUG07568-E09|Sofia Wiedenbrug||BOLD:ACG4398  
Limnophyes sp. 2SW|BIOUG07810-D05|Sofia Wiedenbrug||BOLD:ACG4398  
Limnophyes sp. 2SW|BIOUG07418-D12|Sofia Wiedenbrug||BOLD:ACG4398  
Limnophyes sp. 2SW|BIOUG06065-B06|Sofia Wiedenbrug||BOLD:ACG4398  
Limnophyes sp. 2SW|BIOUG07410-F11|Sofia Wiedenbrug||BOLD:ACG4398  
Limnophyes sp. 2SW|BIOUG07929-H05|Sofia Wiedenbrug||BOLD:ACG4398  
Limnophyes sp. 2SW|BIOUG07503-D05|Sofia Wiedenbrug|BIN Taxonomy Match|BOLD:ACG4398  
Limnophyes sp. 2SW|BIOUG07930-D03|Sofia Wiedenbrug||BOLD:ACG4398  
Limnophyes sp. 2SW|BIOUG07405-C07|Sofia Wiedenbrug||BOLD:ACG4398  
Limnophyes sp. 2SW|BIOUG06052-E12|Sofia Wiedenbrug||BOLD:ACG4398  
Limnophyes sp. 2SW|BIOUG05946-E03|Sofia Wiedenbrug||BOLD:ACG4398  
Limnophyes sp. 2SW|BIOUG07805-C03|Sofia Wiedenbrug|BOLD ID Engine Manual|BOLD:ACG4398  
Limnophyes sp. 2SW|BIOUG06054-H01|Sofia Wiedenbrug||BOLD:ACG4398  
Limnophyes sp. 2SW|BIOUG06094-C01|Sofia Wiedenbrug||BOLD:ACG4398  
Limnophyes sp. 2SW|BIOUG08180-F04|Sofia Wiedenbrug||BOLD:ACG4398  
Limnophyes sp. 2SW|BIOUG07563-G11|Sofia Wiedenbrug||BOLD:ACG4398  
Limnophyes sp. 2SW|BIOUG06090-C04|Sofia Wiedenbrug||BOLD:ACG4398  
Limnophyes sp. 2SW|BIOUG07407-A12|Sofia Wiedenbrug||BOLD:ACG4398  
Limnophyes sp. 2SW|BIOUG06274-C03|Sofia Wiedenbrug|BOLD ID Engine Manual|BOLD:ACG4398  
Limnophyes sp. 2SW|BIOUG07760-E10|Sofia Wiedenbrug||BOLD:ACG4398  
Limnophyes sp. 2SW|BIOUG07754-A06|Sofia Wiedenbrug||BOLD:ACG4398  
Limnophyes sp. 2SW|BIOUG07755-E06|Sofia Wiedenbrug||BOLD:ACG4398  
Limnophyes sp. 2SW|BIOUG07757-C06|Sofia Wiedenbrug||BOLD:ACG4398  
Limnophyes sp. 2SW|BIOUG07757-E02|Sofia Wiedenbrug||BOLD:ACG4398  
Limnophyes sp. 2SW|BIOUG07563-H04|Sofia Wiedenbrug||BOLD:ACG4398  
Limnophyes sp. 2SW|BIOUG07758-F07|Sofia Wiedenbrug||BOLD:ACG4398  
Limnophyes sp. 2SW|BIOUG07759-G10|Sofia Wiedenbrug||BOLD:ACG4398  
Limnophyes sp. 2SW|BIOUG07759-A05|Sofia Wiedenbrug||BOLD:ACG4398  
Limnophyes sp. 2SW|BIOUG07944-C08|Sofia Wiedenbrug||BOLD:ACG4398  
Limnophyes sp. 2SW|BIOUG07759-G06|Sofia Wiedenbrug||BOLD:ACG4398  
Limnophyes sp. 2SW|BIOUG07755-A11|Sofia Wiedenbrug||BOLD:ACG4398  
Limnophyes sp. 2SW|BIOUG07757-B06|Sofia Wiedenbrug||BOLD:ACG4398  
Limnophyes sp. 2SW|BIOUG07810-B06|Sofia Wiedenbrug||BOLD:ACG4398  
Limnophyes sp. 2SW|BIOUG07810-G12|Sofia Wiedenbrug||BOLD:ACG4398  
Limnophyes sp. 2SW|BIOUG08180-C07|Sofia Wiedenbrug||BOLD:ACG4398  
Limnophyes sp. 2SW|BIOUG07754-B05|Sofia Wiedenbrug||BOLD:ACG4398  
Limnophyes sp. 2SW|BIOUG08140-D09|Sofia Wiedenbrug||BOLD:ACG4398  
Limnophyes sp. 2SW|BIOUG06517-G06|Sofia Wiedenbrug||BOLD:ACG4398  
Limnophyes sp. 2SW|BIOUG08137-G03|Sofia Wiedenbrug||BOLD:ACG4398  
Limnophyes sp. 2SW|BIOUG06087-A06|Sofia Wiedenbrug||BOLD:ACG4398  
Limnophyes sp. 2SW|BIOUG06209-E10|Sofia Wiedenbrug||BOLD:ACG4398  
Limnophyes sp. 2SW|BIOUG07928-E04|Sofia Wiedenbrug||BOLD:ACG4398  
Limnophyes sp. 2SW|BIOUG07567-G12|Sofia Wiedenbrug||BOLD:ACG4398  
Limnophyes sp. 2SW|BIOUG07808-H08|Sofia Wiedenbrug|BIN Taxonomy Match|BOLD:ACG4398  
Limnophyes sp. 2SW|BIOUG07808-D02|Sofia Wiedenbrug|BIN Taxonomy Match|BOLD:ACG4398  
Limnophyes sp. 2SW|BIOUG07565-D02|Sofia Wiedenbrug|BOLD ID Engine Manual|BOLD:ACG4398  
Limnophyes sp. 2SW|BIOUG07808-A01|Sofia Wiedenbrug|BOLD ID Engine Manual|BOLD:ACG4398  
Limnophyes sp. 2SW|BIOUG07809-G09|Sofia Wiedenbrug|BIN Taxonomy Match|BOLD:ACG4398  
Limnophyes sp. 2SW|BIOUG07407-A05|Sofia Wiedenbrug|BOLD ID Engine Manual|BOLD:ACG4398  
Limnophyes sp. 2SW|BIOUG07646-B09|Sofia Wiedenbrug|BIN Taxonomy Match|BOLD:ACG4398  
Limnophyes sp. 2SW|BIOUG07808-G09|Sofia Wiedenbrug|BIN Taxonomy Match|BOLD:ACG4398  
Limnophyes sp. 2SW|BIOUG06052-D02|Sofia Wiedenbrug||BOLD:ACG4398  
Limnophyes sp. 2SW|BIOUG07567-C04|Sofia Wiedenbrug||BOLD:ACG4398  
Limnophyes sp. 2SW|BIOUG07757-F03|Sofia Wiedenbrug||BOLD:ACG4398  
Limnophyes sp. 2SW|BIOUG07418-D04|Sofia Wiedenbrug|BOLD ID Engine Manual|BOLD:ACG4398  
Limnophyes sp. 2SW|BIOUG07410-C11|Sofia Wiedenbrug||BOLD:ACG4398  
Limnophyes sp. 2SW|BIOUG07757-B07|Sofia Wiedenbrug||BOLD:ACG4398  
Limnophyes sp. 2SW|BIOUG07930-B04|Sofia Wiedenbrug||BOLD:ACG4398  
Limnophyes sp. 2SW|BIOUG07415-H06|Sofia Wiedenbrug|BIN Taxonomy Match|BOLD:ACG4398  
Limnophyes sp. 2SW|BIOUG07405-B10|Sofia Wiedenbrug||BOLD:ACG4398  
Limnophyes sp. 2SW|BIOUG06210-D02|Sofia Wiedenbrug|BIN Taxonomy Match|BOLD:ACG4398  
Limnophyes sp. 2SW|BIOUG07805-H04|Sofia Wiedenbrug|BOLD ID Engine Manual|BOLD:ACG4398  
Limnophyes sp. 2SW|BIOUG05780-F01|Sofia Wiedenbrug||BOLD:ACG4398  
Limnophyes sp. 2SW|BIOUG06093-C11|Sofia Wiedenbrug||BOLD:ACG4398  
Limnophyes sp. 2SW|BIOUG05777-H11|Sofia Wiedenbrug||BOLD:ACG4398  
Limnophyes sp. 2SW|BIOUG08136-H11|Sofia Wiedenbrug||BOLD:ACG4398  
Limnophyes sp. 2SW|BIOUG07759-A01|Sofia Wiedenbrug||BOLD:ACG4398  
Limnophyes sp. 2SW|BIOUG07755-C09|Sofia Wiedenbrug||BOLD:ACG4398  
Limnophyes sp. 2SW|BIOUG08132-G09|Sofia Wiedenbrug||BOLD:ACG4398  
Limnophyes sp. 2SW|BIOUG08128-D02|Sofia Wiedenbrug||BOLD:ACG4398  
Limnophyes sp. 2SW|BIOUG08318-D11|Sofia Wiedenbrug||BOLD:ACG4398  
Limnophyes sp. 2SW|BIOUG07410-C03|Sofia Wiedenbrug||BOLD:ACG4398  
Limnophyes sp. 2SW|BIOUG07944-D12|Sofia Wiedenbrug||BOLD:ACG4398  
Limnophyes sp. 2SW|BIOUG07569-H09|Sofia Wiedenbrug||BOLD:ACG4398  
Limnophyes sp. 2SW|BIOUG06090-D10|Sofia Wiedenbrug||BOLD:ACG4398  
Limnophyes sp. 2SW|BIOUG05944-G07|Sofia Wiedenbrug||BOLD:ACG4398  
Limnophyes sp. 2SW|BIOUG07944-E04|Sofia Wiedenbrug||BOLD:ACG4398  
Limnophyes sp. 2SW|BIOUG07810-E11|Sofia Wiedenbrug||BOLD:ACG4398  
Limnophyes sp. 2SW|BIOUG08128-F05|Sofia Wiedenbrug||BOLD:ACG4398  
Limnophyes sp. 2SW|BIOUG07647-A01|Sofia Wiedenbrug||BOLD:ACG4398  
Limnophyes sp. 2SW|BIOUG07565-B10|Sofia Wiedenbrug||BOLD:ACG4398  
Limnophyes sp. 2SW|BIOUG07809-A12|Sofia Wiedenbrug|BIN Taxonomy Match|BOLD:ACG4398  
Limnophyes sp. 2SW|BIOUG07809-B08|Sofia Wiedenbrug|BIN Taxonomy Match|BOLD:ACG4398  
Limnophyes sp. 2SW|BIOUG07809-G10|Sofia Wiedenbrug|BIN Taxonomy Match|BOLD:ACG4398  
Limnophyes sp. 2SW|BIOUG07646-H09|Sofia Wiedenbrug|BOLD ID Engine Manual|BOLD:ACG4398  
Limnophyes sp. 2SW|BIOUG07646-E12|Sofia Wiedenbrug|BIN Taxonomy Match|BOLD:ACG4398  
Limnophyes sp. 2SW|BIOUG07567-F06|Sofia Wiedenbrug|BOLD ID Engine Manual|BOLD:ACG4398  
Limnophyes sp. 2SW|BIOUG07415-C03|Sofia Wiedenbrug|BOLD ID Engine Manual|BOLD:ACG4398  
Limnophyes sp. 2SW|BIOUG07808-C04|Sofia Wiedenbrug|BOLD ID Engine Manual|BOLD:ACG4398  
Limnophyes sp. 2SW|BIOUG07646-A06|Sofia Wiedenbrug|BOLD ID Engine Manual|BOLD:ACG4398  
Limnophyes sp. 2SW|BIOUG06210-D06|Sofia Wiedenbrug||BOLD:ACG4398  
Limnophyes sp. 2SW|BIOUG07646-G06|Sofia Wiedenbrug|BOLD ID Engine Manual|BOLD:ACG4398  
Limnophyes sp. 2SW|BIOUG07566-C08|Sofia Wiedenbrug|BOLD ID Engine Manual|BOLD:ACG4398

Limnophyes sp. 2SW|BIOUG06100-D06|Sofia Wiedenbrug|BOLD:ACG4398  
Limnophyes sp. 2SW|BIOUG07646-G06|Sofia Wiedenbrug|BOLD ID Engine Manual|BOLD:ACG4398  
Limnophyes sp. 2SW|BIOUG07566-C01|Sofia Wiedenbrug|BOLD ID Engine Manual|BOLD:ACG4398  
Limnophyes sp. 2SW|BIOUG07565-D06|Sofia Wiedenbrug|BOLD:ACG4398  
Limnophyes sp. 2SW|BIOUG07565-H07|Sofia Wiedenbrug|BOLD:ACG4398  
Limnophyes sp. 2SW|BIOUG06100-C03|Sofia Wiedenbrug|BOLD ID Engine Manual|BOLD:ACG4398  
Limnophyes sp. 2SW|BIOUG07928-C03|Sofia Wiedenbrug|BOLD:ACG4398  
Limnophyes sp. 2SW|BIOUG07809-H08|Sofia Wiedenbrug|BIN Taxonomy Match|BOLD:ACG4398  
Limnophyes sp. 2SW|BIOUG08370-D04|Sofia Wiedenbrug|BOLD:ACG4398  
Limnophyes sp. 2SW|BIOUG06053-C11|Sofia Wiedenbrug|BOLD:ACG4398  
Limnophyes sp. 2SW|BIOUG07753-F01|Sofia Wiedenbrug|BOLD:ACG4398  
Limnophyes sp. 2SW|BIOUG06090-B06|Sofia Wiedenbrug|BOLD:ACG4398  
Limnophyes sp. 2SW|BIOUG07754-F04|Sofia Wiedenbrug|BOLD:ACG4398  
Limnophyes sp. 2SW|BIOUG05777-E10|Sofia Wiedenbrug|BOLD:ACG4398  
Limnophyes sp. 2SW|BIOUG07930-E04|Sofia Wiedenbrug|BOLD:ACG4398  
Limnophyes sp. 2SW|BIOUG07566-D11|Sofia Wiedenbrug|BOLD:ACG4398  
Limnophyes sp. 2SW|BIOUG06208-D01|Sofia Wiedenbrug|BOLD:ACG4398  
Limnophyes sp. 2SW|BIOUG07566-C04|Sofia Wiedenbrug|BOLD:ACG4398  
Limnophyes sp. 2SW|BIOUG06095-G07|Sofia Wiedenbrug|BOLD:ACG4398  
Limnophyes sp. 2SW|BIOUG07569-H03|Sofia Wiedenbrug|BOLD:ACG4398  
Limnophyes sp. 2SW|BIOUG07929-C09|Sofia Wiedenbrug|BOLD:ACG4398  
Limnophyes sp. 2SW|BIOUG06450-C08|Sofia Wiedenbrug|BOLD:ACG4398  
Limnophyes sp. 2SW|BIOUG06210-E08|Sofia Wiedenbrug|BIN Taxonomy Match|BOLD:ACG4398  
Limnophyes sp. 2SW|BIOUG07928-F02|Sofia Wiedenbrug|BOLD:ACG4398  
Limnophyes sp. 2SW|BIOUG07929-C08|Sofia Wiedenbrug|BOLD:ACG4398  
Limnophyes sp. 2SW|BIOUG08180-E02|Sofia Wiedenbrug|BOLD:ACG4398  
Limnophyes sp. 2SW|BIOUG07929-F08|Sofia Wiedenbrug|BOLD:ACG4398  
Limnophyes sp. 2SW|BIOUG07568-A10|Sofia Wiedenbrug|BOLD:ACG4398  
Limnophyes sp. 2SW|BIOUG07567-A05|Sofia Wiedenbrug|BOLD:ACG4398  
Limnophyes sp. 2SW|BIOUG07410-G06|Sofia Wiedenbrug|BOLD:ACG4398  
Limnophyes sp. 2SW|BIOUG07808-H04|Sofia Wiedenbrug|BIN Taxonomy Match|BOLD:ACG4398  
Limnophyes sp. 2SW|BIOUG07413-C09|Sofia Wiedenbrug|BOLD:ACG4398  
Limnophyes sp. 2SW|BIOUG07945-C08|Sofia Wiedenbrug|BOLD:ACG4398  
Limnophyes sp. 2SW|BIOUG05776-A03|Sofia Wiedenbrug|BOLD:ACG4398  
Limnophyes sp. 2SW|BIOUG08138-D10|Sofia Wiedenbrug|BOLD:ACG4398  
Limnophyes sp. 2SW|BIOUG08097-D05|Sofia Wiedenbrug|BOLD:ACG4398  
Limnophyes sp. 2SW|BIOUG08132-F04|Sofia Wiedenbrug|BOLD:ACG4398  
Limnophyes sp. 2SW|BIOUG07930-E11|Sofia Wiedenbrug|BOLD:ACG4398  
Limnophyes sp. 2SW|BIOUG07755-H09|Sofia Wiedenbrug|BOLD:ACG4398  
Limnophyes sp. 2SW|BIOUG07759-D08|Sofia Wiedenbrug|BOLD:ACG4398  
Limnophyes sp. 2SW|BIOUG07568-H11|Sofia Wiedenbrug|BOLD:ACG4398  
Limnophyes sp. 2SW|BIOUG07756-G08|Sofia Wiedenbrug|BOLD:ACG4398  
Limnophyes sp. 2SW|BIOUG08130-A12|Sofia Wiedenbrug|BOLD:ACG4398  
Limnophyes sp. 2SW|BIOUG07566-A03|Sofia Wiedenbrug|BOLD:ACG4398  
Limnophyes sp. 2SW|BIOUG08125-F07|Sofia Wiedenbrug|BOLD:ACG4398  
Limnophyes sp. 2SW|BIOUG06450-A07|Sofia Wiedenbrug|BOLD:ACG4398  
Limnophyes sp. 2SW|BIOUG07410-G08|Sofia Wiedenbrug|BOLD:ACG4398  
Limnophyes sp. 2SW|BIOUG07563-A12|Sofia Wiedenbrug|BOLD:ACG4398  
Limnophyes sp. 2SW|BIOUG07753-B02|Sofia Wiedenbrug|BOLD:ACG4398  
Limnophyes sp. 2SW|BIOUG08133-G12|Sofia Wiedenbrug|BOLD:ACG4398  
Limnophyes sp. 2SW|BIOUG07414-G03|Sofia Wiedenbrug|BOLD:ACG4398  
Limnophyes sp. 2SW|BIOUG07414-B04|Sofia Wiedenbrug|BOLD:ACG4398  
Limnophyes sp. 2SW|BIOUG07414-E02|Sofia Wiedenbrug|BOLD:ACG4398  
Limnophyes sp. 2SW|BIOUG08129-G10|Sofia Wiedenbrug|BOLD:ACG4398  
Limnophyes sp. 2SW|BIOUG07753-D07|Sofia Wiedenbrug|BOLD:ACG4398  
Limnophyes sp. 2SW|BIOUG06093-H08|Sofia Wiedenbrug|BOLD:ACG4398  
Limnophyes sp. 2SW|BIOUG08092-B12|Sofia Wiedenbrug|BOLD:ACG4398  
Limnophyes sp. 2SW|BIOUG08174-D04|Sofia Wiedenbrug|BOLD:ACG4398  
Limnophyes sp. 2SW|BIOUG06516-B10|Sofia Wiedenbrug|BOLD:ACG4398  
Limnophyes sp. 2SW|BIOUG07928-H05|Sofia Wiedenbrug|BOLD:ACG4398  
Limnophyes sp. 2SW|BIOUG07568-D04|Sofia Wiedenbrug|BOLD:ACG4398  
Limnophyes sp. 2SW|BIOUG07569-D05|Sofia Wiedenbrug|BOLD:ACG4398  
Limnophyes sp. 2SW|BIOUG07408-A10|Sofia Wiedenbrug|BOLD:ACG4398  
Limnophyes sp. 2SW|BIOUG07408-G11|Sofia Wiedenbrug|BOLD:ACG4398  
Limnophyes sp. 2SW|BIOUG07409-G08|Sofia Wiedenbrug|BOLD:ACG4398  
Limnophyes sp. 2SW|BIOUG07808-A07|Sofia Wiedenbrug|BIN Taxonomy Match|BOLD:ACG4398  
Limnophyes sp. 2SW|BIOUG07809-F07|Sofia Wiedenbrug|BIN Taxonomy Match|BOLD:ACG4398  
Limnophyes sp. 2SW|BIOUG07809-H05|Sofia Wiedenbrug|BIN Taxonomy Match|BOLD:ACG4398  
Limnophyes sp. 2SW|BIOUG07809-H06|Sofia Wiedenbrug|BIN Taxonomy Match|BOLD:ACG4398  
Limnophyes sp. 2SW|BIOUG07413-C04|Sofia Wiedenbrug|BOLD:ACG4398  
Limnophyes sp. 2SW|BIOUG06052-D06|Sofia Wiedenbrug|BOLD:ACG4398  
Limnophyes sp. 2SW|BIOUG07408-D09|Sofia Wiedenbrug|BOLD:ACG4398  
Limnophyes sp. 2SW|BIOUG07944-H08|Sofia Wiedenbrug|BOLD:ACG4398  
Limnophyes sp. 2SW|BIOUG08129-C06|Sofia Wiedenbrug|BOLD:ACG4398  
Limnophyes sp. 2SW|BIOUG06052-C07|Sofia Wiedenbrug|BOLD:ACG4398  
Limnophyes sp. 2SW|BIOUG08092-B11|Sofia Wiedenbrug|BOLD:ACG4398  
Limnophyes sp. 2SW|BIOUG07755-E08|Sofia Wiedenbrug|BOLD:ACG4398  
Limnophyes sp. 2SW|BIOUG07565-D08|Sofia Wiedenbrug|BOLD:ACG4398  
Limnophyes sp. 2SW|BIOUG07565-A04|Sofia Wiedenbrug|BOLD:ACG4398  
Limnophyes sp. 2SW|BIOUG07410-G03|Sofia Wiedenbrug|BOLD:ACG4398  
Limnophyes sp. 2SW|BIOUG07414-G09|Sofia Wiedenbrug|BOLD:ACG4398  
Limnophyes sp. 2SW|BIOUG07414-G07|Sofia Wiedenbrug|BOLD:ACG4398  
Limnophyes sp. 2SW|BIOUG07510-E07|Sofia Wiedenbrug|BOLD:ACG4398  
Limnophyes sp. 2SW|BIOUG07510-C02|Sofia Wiedenbrug|BOLD:ACG4398  
Limnophyes sp. 2SW|BIOUG07509-B08|Sofia Wiedenbrug|BOLD:ACG4398  
Limnophyes sp. 2SW|BIOUG08174-F05|Sofia Wiedenbrug|BOLD:ACG4398  
Limnophyes sp. 2SW|BIOUG07753-D04|Sofia Wiedenbrug|BOLD:ACG4398  
Limnophyes sp. 2SW|BIOUG07753-E09|Sofia Wiedenbrug|BOLD:ACG4398  
Limnophyes sp. 2SW|BIOUG07928-E10|Sofia Wiedenbrug|BOLD:ACG4398  
Limnophyes sp. 2SW|BIOUG07809-G02|Sofia Wiedenbrug|BIN Taxonomy Match|BOLD:ACG4398  
Limnophyes sp. 2SW|BIOUG07568-G10|Sofia Wiedenbrug|BOLD:ACG4398  
Limnophyes sp. 2SW|BIOUG07569-A08|Sofia Wiedenbrug|BOLD:ACG4398  
Limnophyes sp. 2SW|BIOUG07569-A11|Sofia Wiedenbrug|BOLD:ACG4398  
Limnophyes sp. 2SW|BIOUG07569-C05|Sofia Wiedenbrug|BOLD:ACG4398  
Limnophyes sp. 2SW|BIOUG07569-E07|Sofia Wiedenbrug|BOLD:ACG4398  
Limnophyes sp. 2SW|BIOUG07413-F09|Sofia Wiedenbrug|BOLD:ACG4398  
Limnophyes sp. 2SW|CCDB24038-C08|Sofia Wiedenbrug|BIN Taxonomy Match|BOLD:ACG4398  
Limnophyes sp. 2SW|BIOUG06093-D09|Sofia Wiedenbrug|BOLD:ACG4398  
Limnophyes sp. 2SW|BIOUG07504-B07|Sofia Wiedenbrug|BIN Taxonomy Match|BOLD:ACG4398  
Limnophyes sp. 2SW|BIOUG07415-E06|Sofia Wiedenbrug|BIN Taxonomy Match|BOLD:ACG4398  
Limnophyes sp. 2SW|BIOUG07415-A12|Sofia Wiedenbrug|BIN Taxonomy Match|BOLD:ACG4398  
Limnophyes sp. 2SW|BIOUG07415-D06|Sofia Wiedenbrug|BIN Taxonomy Match|BOLD:ACG4398

Limnophyes sp. 2SW|BIOUG07415-E06|Sofia Wiedenbrug|BIN Taxonomy Match|BOLD:ACG4398  
Limnophyes sp. 2SW|BIOUG07415-A12|Sofia Wiedenbrug|BIN Taxonomy Match|BOLD:ACG4398  
Limnophyes sp. 2SW|BIOUG07415-D06|Sofia Wiedenbrug|BIN Taxonomy Match|BOLD:ACG4398  
Limnophyes sp. 2SW|BIOUG07415-E04|Sofia Wiedenbrug|BIN Taxonomy Match|BOLD:ACG4398  
Limnophyes sp. 2SW|BIOUG07568-F02|Sofia Wiedenbrug||BOLD:ACG4398  
Limnophyes sp. 2SW|BIOUG07414-E09|Sofia Wiedenbrug||BOLD:ACG4398  
Limnophyes sp. 2SW|BIOUG07413-C01|Sofia Wiedenbrug||BOLD:ACG4398  
Limnophyes sp. 2SW|BIOUG07414-C12|Sofia Wiedenbrug||BOLD:ACG4398  
Limnophyes sp. 2SW|BIOUG06088-D02|Sofia Wiedenbrug||BOLD:ACG4398  
Limnophyes sp. 2SW|BIOUG06056-F06|Sofia Wiedenbrug||BOLD:ACG4398  
Limnophyes sp. 2SW|BIOUG06051-B12|Sofia Wiedenbrug||BOLD:ACG4398  
Limnophyes sp. 2SW|BIOUG08127-H06|Sofia Wiedenbrug||BOLD:ACG4398  
Limnophyes sp. 2SW|BIOUG06094-G11|Sofia Wiedenbrug||BOLD:ACG4398  
Limnophyes sp. 2SW|BIOUG06095-C10|Sofia Wiedenbrug||BOLD:ACG4398  
Limnophyes sp. 2SW|BIOUG06095-D09|Sofia Wiedenbrug||BOLD:ACG4398  
Limnophyes sp. 2SW|BIOUG06096-B05|Sofia Wiedenbrug||BOLD:ACG4398  
Limnophyes sp. 2SW|BIOUG07408-F03|Sofia Wiedenbrug||BOLD:ACG4398  
Limnophyes sp. 2SW|BIOUG05780-F08|Sofia Wiedenbrug||BOLD:ACG4398  
Limnophyes sp. 2SW|BIOUG07929-F07|Sofia Wiedenbrug||BOLD:ACG4398  
Limnophyes sp. 2SW|BIOUG05945-C09|Sofia Wiedenbrug||BOLD:ACG4398  
Limnophyes sp. 2SW|BIOUG07757-G08|Sofia Wiedenbrug||BOLD:ACG4398  
Limnophyes sp. 2SW|BIOUG07754-D10|Sofia Wiedenbrug||BOLD:ACG4398  
Limnophyes sp. 2SW|BIOUG07418-F11|Sofia Wiedenbrug|BIN Taxonomy Match|BOLD:ACG4398  
Limnophyes sp. 2SW|BIOUG06051-C10|Sofia Wiedenbrug||BOLD:ACG4398  
Limnophyes sp. 2SW|BIOUG06056-H11|Sofia Wiedenbrug||BOLD:ACG4398  
Limnophyes sp. 2SW|BIOUG06096-E10|Sofia Wiedenbrug||BOLD:ACG4398  
Limnophyes sp. 2SW|BIOUG07929-C11|Sofia Wiedenbrug||BOLD:ACG4398  
Limnophyes sp. 2SW|BIOUG08135-G01|Sofia Wiedenbrug||BOLD:ACG4398  
Limnophyes sp. 2SW|BIOUG07944-C05|Sofia Wiedenbrug||BOLD:ACG4398  
Limnophyes sp. 2SW|BIOUG07944-E11|Sofia Wiedenbrug||BOLD:ACG4398  
Limnophyes sp. 2SW|BIOUG06210-G01|Sofia Wiedenbrug|BIN Taxonomy Match|BOLD:ACG4398  
Limnophyes sp. 2SW|BIOUG05944-A07|Sofia Wiedenbrug||BOLD:ACG4398  
Limnophyes sp. 2SW|BIOUG06058-A09|Sofia Wiedenbrug||BOLD:ACG4398  
Limnophyes sp. 2SW|BIOUG06096-D07|Sofia Wiedenbrug||BOLD:ACG4398  
Limnophyes sp. 2SW|BIOUG06065-F09|Sofia Wiedenbrug||BOLD:ACG4398  
Limnophyes sp. 2SW|BIOUG07503-G12|Sofia Wiedenbrug|BIN Taxonomy Match|BOLD:ACG4398  
Limnophyes sp. 2SW|BIOUG06056-F08|Sofia Wiedenbrug||BOLD:ACG4398  
Limnophyes sp. 2SW|BIOUG05947-H07|Sofia Wiedenbrug||BOLD:ACG4398  
Limnophyes sp. 2SW|BIOUG06092-C12|Sofia Wiedenbrug||BOLD:ACG4398  
Limnophyes sp. 2SW|BIOUG07415-H07|Sofia Wiedenbrug|BIN Taxonomy Match|BOLD:ACG4398  
Limnophyes sp. 2SW|BIOUG06055-D09|Sofia Wiedenbrug||BOLD:ACG4398  
Limnophyes sp. 2SW|BIOUG05780-D11|Sofia Wiedenbrug||BOLD:ACG4398  
Limnophyes sp. 2SW|BIOUG05944-C12|Sofia Wiedenbrug||BOLD:ACG4398  
Limnophyes sp. 2SW|BIOUG05944-D09|Sofia Wiedenbrug||BOLD:ACG4398  
Limnophyes sp. 2SW|BIOUG07407-D08|Sofia Wiedenbrug||BOLD:ACG4398  
Limnophyes sp. 2SW|BIOUG07407-C06|Sofia Wiedenbrug||BOLD:ACG4398  
Limnophyes sp. 2SW|BIOUG06210-A01|Sofia Wiedenbrug||BOLD:ACG4398  
Limnophyes sp. 2SW|BIOUG06210-H06|Sofia Wiedenbrug|BIN Taxonomy Match|BOLD:ACG4398  
Limnophyes sp. 2SW|BIOUG07408-D02|Sofia Wiedenbrug||BOLD:ACG4398  
Limnophyes sp. 2SW|BIOUG05944-H10|Sofia Wiedenbrug||BOLD:ACG4398  
Limnophyes sp. 2SW|BIOUG06049-A12|Sofia Wiedenbrug||BOLD:ACG4398  
Limnophyes sp. 2SW|BIOUG06054-G10|Sofia Wiedenbrug||BOLD:ACG4398  
Limnophyes sp. 2SW|BIOUG06058-E04|Sofia Wiedenbrug||BOLD:ACG4398  
Limnophyes sp. 2SW|BIOUG07414-G05|Sofia Wiedenbrug||BOLD:ACG4398  
Limnophyes sp. 2SW|BIOUG06054-F02|Sofia Wiedenbrug||BOLD:ACG4398  
Limnophyes sp. 2SW|BIOUG06096-C12|Sofia Wiedenbrug||BOLD:ACG4398  
Limnophyes sp. 2SW|BIOUG07415-C11|Sofia Wiedenbrug|BIN Taxonomy Match|BOLD:ACG4398  
Limnophyes sp. 2SW|BIOUG06054-A07|Sofia Wiedenbrug||BOLD:ACG4398  
Limnophyes sp. 2SW|BIOUG06210-C09|Sofia Wiedenbrug|BIN Taxonomy Match|BOLD:ACG4398  
Limnophyes sp. 2SW|BIOUG06208-G05|Sofia Wiedenbrug||BOLD:ACG4398  
Limnophyes sp. 2SW|BIOUG08320-F04|Sofia Wiedenbrug||BOLD:ACG4398  
Limnophyes sp. 2SW|BIOUG06054-G08|Sofia Wiedenbrug||BOLD:ACG4398  
Limnophyes sp. 2SW|BIOUG06094-C10|Sofia Wiedenbrug||BOLD:ACG4398  
Limnophyes sp. 2SW|BIOUG07805-A05|Sofia Wiedenbrug|BIN Taxonomy Match|BOLD:ACG4398  
Limnophyes sp. 2SW|BIOUG07805-D08|Sofia Wiedenbrug|BOLD ID Engine Manual|BOLD:ACG4398  
Limnophyes sp. 2SW|BIOUG07805-F02|Sofia Wiedenbrug|BOLD ID Engine Manual|BOLD:ACG4398  
Limnophyes sp. 2SW|BIOUG07805-H10|Sofia Wiedenbrug|BIN Taxonomy Match|BOLD:ACG4398  
Limnophyes sp. 2SW|BIOUG05780-G06|Sofia Wiedenbrug||BOLD:ACG4398  
Limnophyes sp. 2SW|BIOUG05944-H09|Sofia Wiedenbrug||BOLD:ACG4398  
Limnophyes sp. 2SW|BIOUG06095-A09|Sofia Wiedenbrug||BOLD:ACG4398  
Limnophyes sp. 2SW|BIOUG05777-B01|Sofia Wiedenbrug||BOLD:ACG4398  
Limnophyes sp. 2SW|BIOUG05777-E08|Sofia Wiedenbrug||BOLD:ACG4398  
Limnophyes sp. 2SW|CCDB21606-G03|Sofia Wiedenbrug||BOLD:ACG4398  
Limnophyes sp. 2SW|BIOUG07407-A10|Sofia Wiedenbrug||BOLD:ACG4398  
Limnophyes sp. 2SW|BIOUG06093-B02|Sofia Wiedenbrug||BOLD:ACG4398  
Limnophyes sp. 2SW|BIOUG05780-A04|Sofia Wiedenbrug||BOLD:ACG4398  
Limnophyes sp. 2SW|BIOUG05945-D01|Sofia Wiedenbrug||BOLD:ACG4398  
Limnophyes sp. 2SW|BIOUG07405-H06|Sofia Wiedenbrug||BOLD:ACG4398  
Limnophyes sp. 2SW|BIOUG07406-A08|Sofia Wiedenbrug||BOLD:ACG4398  
Limnophyes sp. 2SW|BIOUG07406-G04|Sofia Wiedenbrug||BOLD:ACG4398  
Limnophyes sp. 2SW|BIOUG06094-D10|Sofia Wiedenbrug||BOLD:ACG4398  
Limnophyes sp. 2SW|BIOUG07929-E01|Sofia Wiedenbrug||BOLD:ACG4398  
Limnophyes sp. 2SW|BIOUG05777-G03|Sofia Wiedenbrug||BOLD:ACG4398  
Limnophyes sp. 2SW|BIOUG07757-F11|Sofia Wiedenbrug||BOLD:ACG4398  
Limnophyes sp. 2SW|BIOUG07759-A09|Sofia Wiedenbrug||BOLD:ACG4398  
Limnophyes sp. 2SW|BIOUG07563-B03|Sofia Wiedenbrug||BOLD:ACG4398  
Limnophyes sp. 2SW|BIOUG05900-E11|Sofia Wiedenbrug||BOLD:ACG4398  
Limnophyes sp. 2SW|BIOUG07759-B02|Sofia Wiedenbrug||BOLD:ACG4398  
Limnophyes sp. 2SW|BIOUG07563-A08|Sofia Wiedenbrug||BOLD:ACG4398  
Limnophyes sp. 2SW|BIOUG07754-H08|Sofia Wiedenbrug||BOLD:ACG4398  
Limnophyes sp. 2SW|BIOUG08135-B11|Sofia Wiedenbrug||BOLD:ACG4398  
Limnophyes sp. 2SW|BIOUG08140-G11|Sofia Wiedenbrug||BOLD:ACG4398  
Limnophyes sp. 2SW|BIOUG07758-D10|Sofia Wiedenbrug||BOLD:ACG4398  
Limnophyes sp. 2SW|BIOUG07415-F02|Sofia Wiedenbrug|BOLD ID Engine Manual|BOLD:ACG4398  
Limnophyes sp. 2SW|BIOUG07758-E10|Sofia Wiedenbrug||BOLD:ACG4398  
Limnophyes sp. 2SW|BIOUG07409-A03|Sofia Wiedenbrug||BOLD:ACG4398  
Limnophyes sp. 2SW|BIOUG07563-G05|Sofia Wiedenbrug||BOLD:ACG4398  
Limnophyes sp. 2SW|BIOUG06516-C11|Sofia Wiedenbrug||BOLD:ACG4398  
Limnophyes sp. 2SW|BIOUG07755-D06|Sofia Wiedenbrug||BOLD:ACG4398  
Limnophyes sp. 2SW|BIOUG07755-B09|Sofia Wiedenbrug||BOLD:ACG4398  
Limnophyes sp. 2SW|BIOUG07754-A09|Sofia Wiedenbrug||BOLD:ACG4398  
Limnophyes sp. 2SW|BIOUG07754-E02|Sofia Wiedenbrug||BOLD:ACG4398  
Limnophyes sp. 2SW|BIOUG07754-B11|Sofia Wiedenbrug||BOLD:ACG4398

Limnophyes sp. 2SW|BIOUG07754-A09|Sofia Wiedenbrug|BOLD:ACG4398  
 Limnophyes sp. 2SW|BIOUG07754-E02|Sofia Wiedenbrug|BOLD:ACG4398  
 Limnophyes sp. 2SW|BIOUG07754-B11|Sofia Wiedenbrug|BOLD:ACG4398  
 Limnophyes sp. 2SW|BIOUG07754-A11|Sofia Wiedenbrug|BOLD:ACG4398  
 Limnophyes sp. 2SW|BIOUG08369-G11|Sofia Wiedenbrug|BOLD:ACG4398  
 Limnophyes sp. 2SW|BIOUG05776-D11|Sofia Wiedenbrug|BOLD:ACG4398  
 Limnophyes sp. 2SW|BIOUG08130-A11|Sofia Wiedenbrug|BOLD:ACG4398  
 Limnophyes sp. 2SW|BIOUG08127-B02|Sofia Wiedenbrug|BOLD:ACG4398  
 Limnophyes sp. 2SW|BIOUG07760-D10|Sofia Wiedenbrug|BOLD:ACG4398  
 Limnophyes sp. 2SW|BIOUG07755-E09|Sofia Wiedenbrug|BOLD:ACG4398  
 Limnophyes sp. 2SW|BIOUG07757-C09|Sofia Wiedenbrug|BOLD:ACG4398  
 Limnophyes sp. 2SW|BIOUG07760-F08|Sofia Wiedenbrug|BOLD:ACG4398  
 Limnophyes sp. 2SW|BIOUG07758-B07|Sofia Wiedenbrug|BOLD:ACG4398  
 Limnophyes sp. 2SW|BIOUG07757-D05|Sofia Wiedenbrug|BOLD:ACG4398  
 Limnophyes sp. 2SW|BIOUG07758-H08|Sofia Wiedenbrug|BOLD:ACG4398  
 Limnophyes sp. 2SW|BIOUG07759-B07|Sofia Wiedenbrug|BOLD:ACG4398  
 Limnophyes sp. 2SW|BIOUG07759-C03|Sofia Wiedenbrug|BOLD:ACG4398  
 Limnophyes sp. 2SW|BIOUG07563-B09|Sofia Wiedenbrug|BOLD:ACG4398  
 Limnophyes sp. 2SW|BIOUG07647-H11|Sofia Wiedenbrug|BOLD:ACG4398  
 Limnophyes sp. 2SW|BIOUG07760-B07|Sofia Wiedenbrug|BOLD:ACG4398  
 Limnophyes sp. 2SW|BIOUG07810-G01|Sofia Wiedenbrug|BOLD:ACG4398  
 Limnophyes sp. 2SW|BIOUG06441-H11|Sofia Wiedenbrug|BOLD:ACG4398  
 Limnophyes sp. 2SW|BIOUG07758-D04|Sofia Wiedenbrug|BOLD:ACG4398  
 Limnophyes sp. 2SW|BIOUG07755-C04|Sofia Wiedenbrug|BOLD:ACG4398  
 Limnophyes sp. 2SW|BIOUG08095-F03|Sofia Wiedenbrug|BOLD:ACG4398  
 Limnophyes sp. 2SW|BIOUG08369-G02|Sofia Wiedenbrug|BOLD:ACG4398  
 Limnophyes sp. 2SW|BIOUG07759-B04|Sofia Wiedenbrug|BOLD:ACG4398  
 Limnophyes sp. 2SW|BIOUG08098-E07|Sofia Wiedenbrug|BOLD:ACG4398  
 Limnophyes sp. 2SW|BIOUG07754-A01|Sofia Wiedenbrug|BOLD:ACG4398  
 Limnophyes sp. 2SW|BIOUG07754-G04|Sofia Wiedenbrug|BOLD:ACG4398  
 Limnophyes sp. 2SW|BIOUG07810-D08|Sofia Wiedenbrug|BOLD:ACG4398  
 Limnophyes sp. 2SW|BIOUG08130-F03|Sofia Wiedenbrug|BOLD:ACG4398  
 Limnophyes sp. 2SW|BIOUG08135-B06|Sofia Wiedenbrug|BOLD:ACG4398  
 Limnophyes sp. 2SW|BIOUG08135-G07|Sofia Wiedenbrug|BOLD:ACG4398  
 Limnophyes sp. 2SW|BIOUG07930-G02|Sofia Wiedenbrug|BOLD:ACG4398  
 Limnophyes sp. 2SW|BIOUG06443-D01|Sofia Wiedenbrug|BOLD:ACG4398  
 Limnophyes sp. 2SW|BIOUG08139-A11|Sofia Wiedenbrug|BOLD:ACG4398  
 Limnophyes sp. 2SW|BIOUG06516-C10|Sofia Wiedenbrug|BOLD:ACG4398  
 Limnophyes sp. 2SW|BIOUG07753-B06|Sofia Wiedenbrug|BOLD:ACG4398  
 Limnophyes sp. 2SW|BIOUG07753-C06|Sofia Wiedenbrug|BOLD:ACG4398  
 Limnophyes sp. 2SW|BIOUG07753-E05|Sofia Wiedenbrug|BOLD:ACG4398  
 Limnophyes sp. 2SW|BIOUG07754-H11|Sofia Wiedenbrug|BOLD:ACG4398  
 Limnophyes sp. 2SW|BIOUG07755-C05|Sofia Wiedenbrug|BOLD:ACG4398  
 Limnophyes sp. 2SW|BIOUG07755-F08|Sofia Wiedenbrug|BOLD:ACG4398  
 Limnophyes sp. 2SW|BIOUG07760-G11|Sofia Wiedenbrug|BOLD:ACG4398  
 Limnophyes sp. 2SW|BIOUG07760-G12|Sofia Wiedenbrug|BOLD:ACG4398  
 Limnophyes sp. 2SW|BIOUG07757-E08|Sofia Wiedenbrug|BOLD:ACG4398  
 Limnophyes sp. 2SW|BIOUG07563-G04|Sofia Wiedenbrug|BOLD:ACG4398  
 Limnophyes sp. 2SW|BIOUG07757-F04|Sofia Wiedenbrug|BOLD:ACG4398  
 Limnophyes sp. 2SW|BIOUG07758-E03|Sofia Wiedenbrug|BOLD:ACG4398  
 Limnophyes sp. 2SW|BIOUG07754-G02|Sofia Wiedenbrug|BOLD:ACG4398  
 Limnophyes sp. 2SW|BIOUG07755-F09|Sofia Wiedenbrug|BOLD:ACG4398  
 Limnophyes sp. 2SW|BIOUG06517-G10|Sofia Wiedenbrug|BOLD:ACG4398  
 Limnophyes sp. 2SW|BIOUG07759-E06|Sofia Wiedenbrug|BOLD:ACG4398  
 Limnophyes sp. 2SW|BIOUG07759-G12|Sofia Wiedenbrug|BOLD:ACG4398  
 Limnophyes sp. 2SW|BIOUG07810-D06|Sofia Wiedenbrug|BOLD:ACG4398  
 Limnophyes sp. 2SW|BIOUG07755-F03|Sofia Wiedenbrug|BOLD:ACG4398  
 Limnophyes sp. 2SW|BIOUG07759-H05|Sofia Wiedenbrug|BOLD:ACG4398  
 Limnophyes sp. 2SW|BIOUG08133-A08|Sofia Wiedenbrug|BOLD:ACG4398  
 Limnophyes sp. 2SW|BIOUG07754-G07|Sofia Wiedenbrug|BOLD:ACG4398  
 Limnophyes sp. 2SW|BIOUG07810-B12|Sofia Wiedenbrug|BOLD:ACG4398  
 Limnophyes sp. 2SW|BIOUG07569-F12|Sofia Wiedenbrug|BOLD:ACG4398  
 Limnophyes sp. 2SW|BIOUG07928-H02|Sofia Wiedenbrug|BOLD:ACG4398  
 Limnophyes sp. 2SW|BIOUG08097-C09|Sofia Wiedenbrug|BOLD:ACG4398  
 Limnophyes sp. 2SW|BIOUG07647-F02|Sofia Wiedenbrug|BOLD:ACG4398  
 Limnophyes sp. 2SW|BIOUG07759-F12|Sofia Wiedenbrug|BOLD:ACG4398  
 Limnophyes sp. 2SW|BIOUG07647-C03|Sofia Wiedenbrug|BOLD:ACG4398  
 Limnophyes sp. 2SW|BIOUG06100-F01|Sofia Wiedenbrug|BOLD:ACG4398  
 Limnophyes sp. 2SW|BIOUG06100-D04|Sofia Wiedenbrug|BOLD:ACG4398  
 Limnophyes sp. 2SW|BIOUG06100-B08|Sofia Wiedenbrug|BOLD:ACG4398

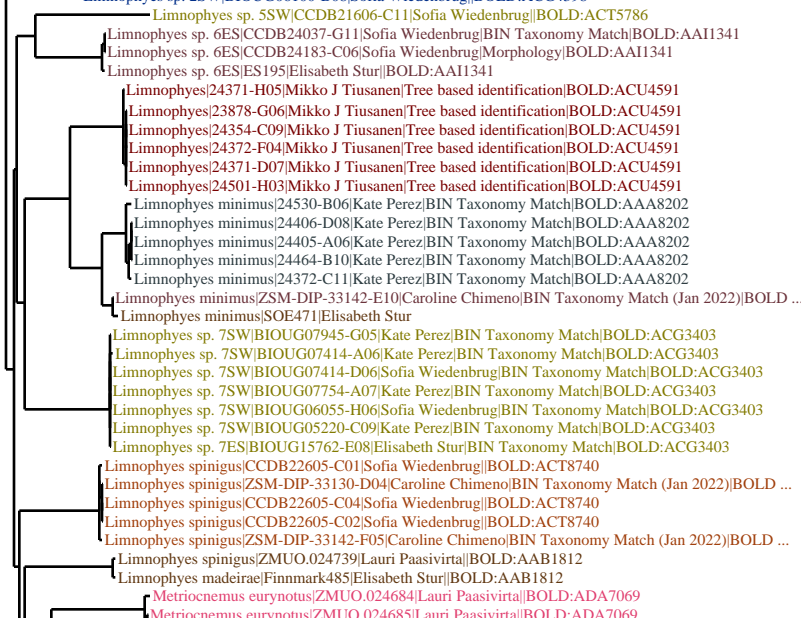

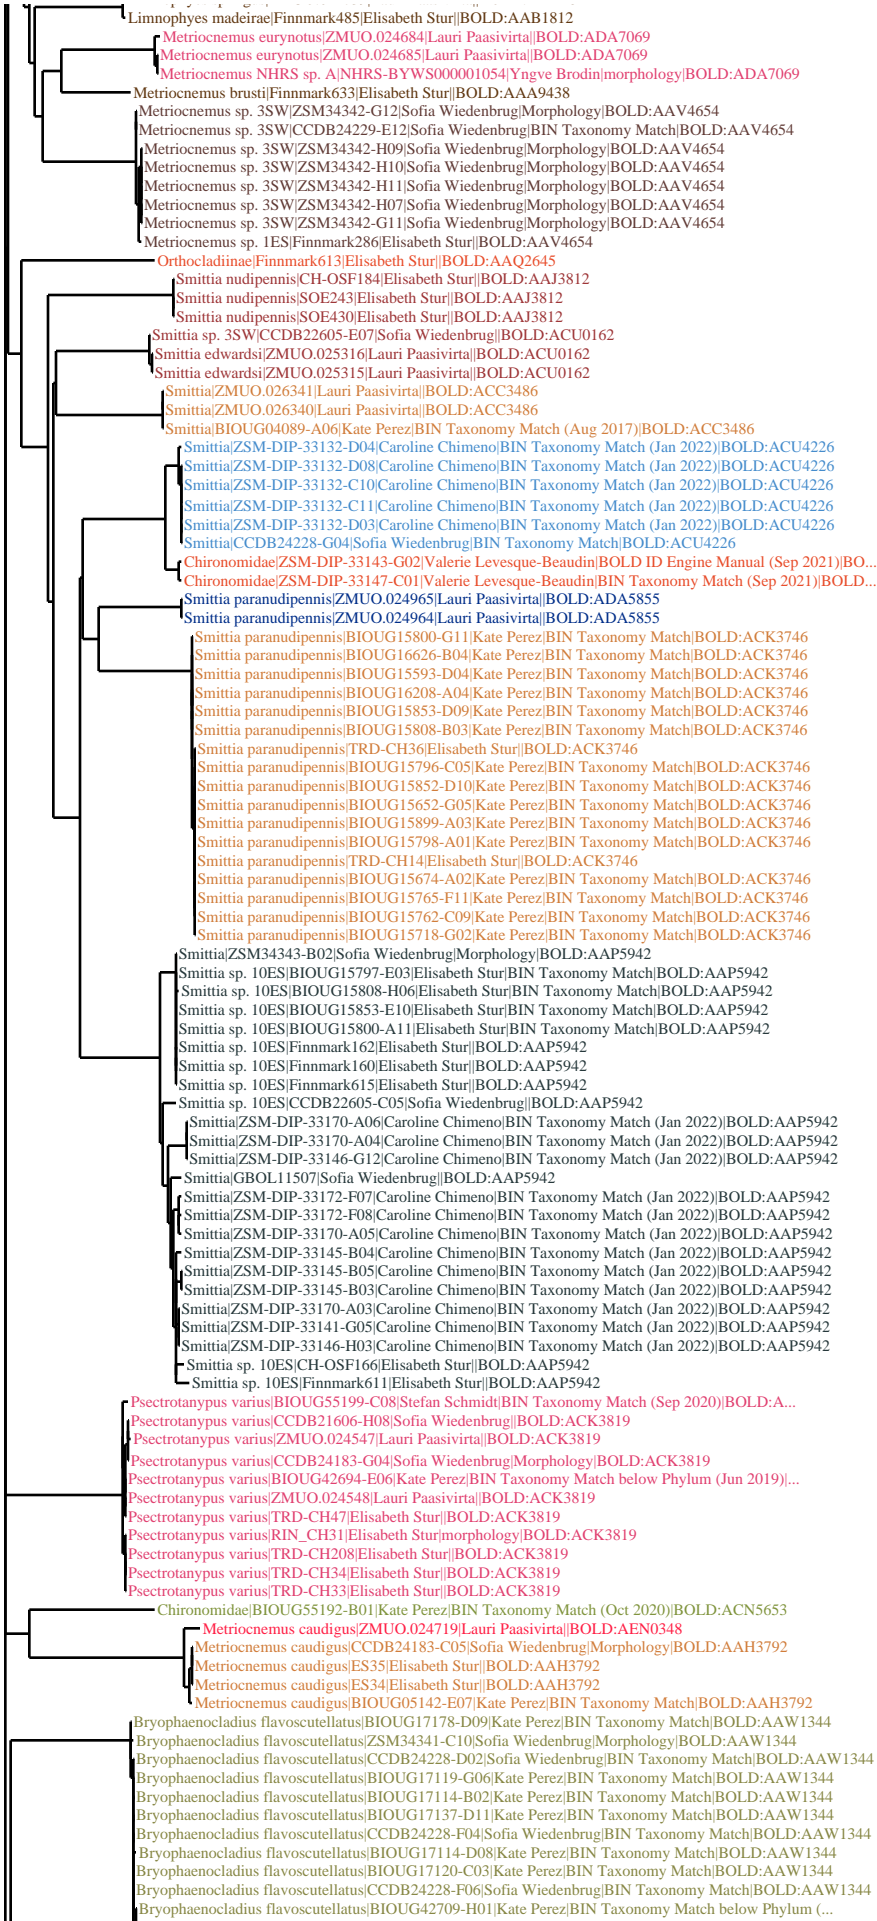

Bryophaenocladus flavoscutellatus|BIOUG17120-C05|Kate Perez|BIN Taxonomy Match|BOLD:AAW1344  
 Bryophaenocladus flavoscutellatus|CCDB24228-F06|Sofia Wiedenbrug|BIN Taxonomy Match|BOLD:AAW1344  
 Bryophaenocladus flavoscutellatus|BIOUG42709-H01|Kate Perez|BIN Taxonomy Match below Phylum (...)  
 Bryophaenocladus flavoscutellatus|ZSM-DIP-33132-A04|Caroline Chimenó|BIN Taxonomy Match (Jan ...)  
 Bryophaenocladus flavoscutellatus|BIOUG42669-E03|Kate Perez|BIN Taxonomy Match below Phylum (...)  
 Bryophaenocladus flavoscutellatus|BIOUG42927-A09|Kate Perez|BIN Taxonomy Match below Phylum (...)  
 Bryophaenocladus flavoscutellatus|ZSM-DIP-33138-H08|Caroline Chimenó|BIN Taxonomy Match (Jan ...)  
 Bryophaenocladus flavoscutellatus|BIOUG42678-D09|Kate Perez|BIN Taxonomy Match below Phylum (...)  
 Bryophaenocladus flavoscutellatus|BIOUG55195-F12|Stefan Schmidt|BIN Taxonomy Match (Sep 2020...)  
 Bryophaenocladus flavoscutellatus|BIOUG42713-A09|Kate Perez|BIN Taxonomy Match below Phylum (...)  
 Bryophaenocladus flavoscutellatus|BIOUG42709-G02|Kate Perez|BIN Taxonomy Match below Phylum (...)  
 Bryophaenocladus flavoscutellatus|BIOUG42659-A04|Kate Perez|BIN Taxonomy Match below Phylum (...)  
 Bryophaenocladus flavoscutellatus|BIOUG42657-D08|Kate Perez|BIN Taxonomy Match below Phylum (...)  
 Bryophaenocladus flavoscutellatus|ZSM-DIP-33136-A03|Caroline Chimenó|BIN Taxonomy Match (Jan ...)  
 Bryophaenocladus flavoscutellatus|BIOUG55120-D11|Stefan Schmidt|BIN Taxonomy Match (Sep 2020...)  
 Bryophaenocladus flavoscutellatus|BIOUG42915-E04|Kate Perez|BIN Taxonomy Match below Phylum (...)  
 Bryophaenocladus flavoscutellatus|ZSM-DIP-33136-A04|Caroline Chimenó|BIN Taxonomy Match (Jan ...)  
 Bryophaenocladus flavoscutellatus|ZSM-DIP-33136-A05|Caroline Chimenó|BIN Taxonomy Match (Jan ...)  
 Bryophaenocladus flavoscutellatus|ZSM-DIP-33136-A06|Caroline Chimenó|BIN Taxonomy Match (Jan ...)  
 Bryophaenocladus flavoscutellatus|ZSM-DIP-33147-H07|Caroline Chimenó|BIN Taxonomy Match (Jan ...)  
 Bryophaenocladus flavoscutellatus|ZSM-DIP-33147-H08|Caroline Chimenó|BIN Taxonomy Match (Jan ...)  
 Bryophaenocladus flavoscutellatus|ZSM-DIP-33147-H09|Caroline Chimenó|BIN Taxonomy Match (Jan ...)  
 Bryophaenocladus flavoscutellatus|ZSM-DIP-33138-F08|Caroline Chimenó|BIN Taxonomy Match (Jan ...)  
 Bryophaenocladus flavoscutellatus|BIOUG42741-E03|Kate Perez|BIN Taxonomy Match below Phylum (...)  
 Bryophaenocladus flavoscutellatus|BIOUG42744-G11|Kate Perez|BIN Taxonomy Match below Phylum (...)  
 Bryophaenocladus flavoscutellatus|BIOUG42702-F12|Kate Perez|BIN Taxonomy Match below Phylum (...)  
 Bryophaenocladus flavoscutellatus|BIOUG42745-G10|Kate Perez|BIN Taxonomy Match below Phylum (...)  
 Bryophaenocladus flavoscutellatus|BIOUG42660-C12|Kate Perez|BIN Taxonomy Match below Phylum (...)  
 Bryophaenocladus flavoscutellatus|BIOUG42764-H07|Kate Perez|BIN Taxonomy Match below Phylum (...)  
 Bryophaenocladus flavoscutellatus|BIOUG42926-A10|Kate Perez|BIN Taxonomy Match below Phylum (...)  
 Bryophaenocladus flavoscutellatus|ZSM34341-D02|Sofia Wiedenbrug|Morphology|BOLD:AAW1344  
 Bryophaenocladus flavoscutellatus|BIOUG17117-F07|Kate Perez|BIN Taxonomy Match|BOLD:AAW1344  
 Bryophaenocladus flavoscutellatus|BIOUG17114-F02|Kate Perez|BIN Taxonomy Match|BOLD:AAW1344  
 Bryophaenocladus flavoscutellatus|ZSM34341-D05|Sofia Wiedenbrug|Morphology|BOLD:AAW1344  
 Bryophaenocladus flavoscutellatus|BIOUG17095-E04|Kate Perez|BIN Taxonomy Match|BOLD:AAW1344  
 Bryophaenocladus flavoscutellatus|BIOUG17095-E02|Kate Perez|BIN Taxonomy Match|BOLD:AAW1344  
 Bryophaenocladus flavoscutellatus|ZSM34341-C12|Sofia Wiedenbrug|Morphology|BOLD:AAW1344  
 Bryophaenocladus flavoscutellatus|BIOUG17225-G05|Kate Perez|BIN Taxonomy Match|BOLD:AAW1344  
 Bryophaenocladus flavoscutellatus|ZSM-DIP-33129-D03|Caroline Chimenó|BIN Taxonomy Match (Jan ...)  
 Bryophaenocladus flavoscutellatus|BIOUG42663-B06|Kate Perez|BIN Taxonomy Match below Phylum (...)  
 Bryophaenocladus flavoscutellatus|BIOUG42741-H05|Kate Perez|BIN Taxonomy Match below Phylum (...)  
 Bryophaenocladus flavoscutellatus|ZSM-DIP-33132-B09|Caroline Chimenó|BIN Taxonomy Match (Jan ...)  
 Bryophaenocladus flavoscutellatus|ZSM-DIP-33132-B11|Caroline Chimenó|BIN Taxonomy Match (Jan ...)  
 Bryophaenocladus flavoscutellatus|ZSM-DIP-33138-H02|Caroline Chimenó|BIN Taxonomy Match (Jan ...)  
 Bryophaenocladus flavoscutellatus|ZSM-DIP-33129-B12|Caroline Chimenó|BIN Taxonomy Match (Jan ...)  
 Bryophaenocladus flavoscutellatus|ZSM-DIP-33129-D02|Caroline Chimenó|BIN Taxonomy Match (Jan ...)  
 Bryophaenocladus flavoscutellatus|BIOUG42655-C12|Kate Perez|BIN Taxonomy Match below Phylum (...)  
 Bryophaenocladus flavoscutellatus|BIOUG42654-E08|Kate Perez|BIN Taxonomy Match below Phylum (...)  
 Bryophaenocladus flavoscutellatus|BIOUG42764-F02|Kate Perez|BIN Taxonomy Match below Phylum (...)  
 Bryophaenocladus flavoscutellatus|BIOUG17096-E05|Kate Perez|BIN Taxonomy Match|BOLD:AAW1344  
 Bryophaenocladus flavoscutellatus|CH-OSF83|Elisabeth Stur|BOLD:AAW1344

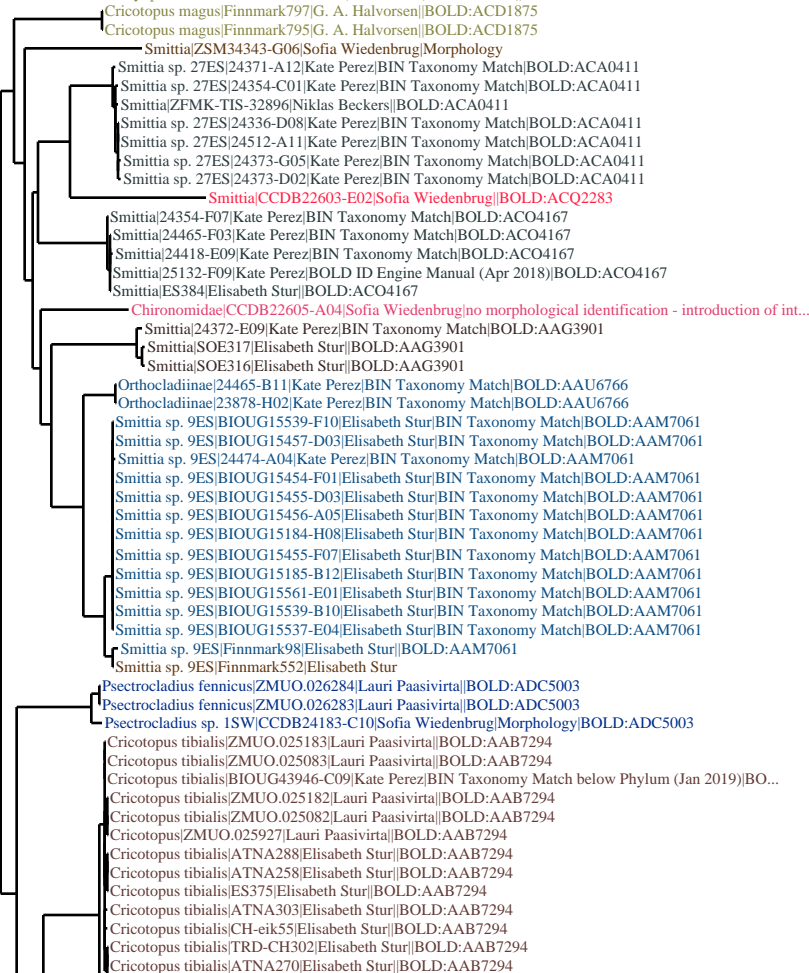

Cricotopus tibialis|CH-eik55|Elisabeth Stur|BOLD:AAB7294  
 Cricotopus tibialis|TRD-CH302|Elisabeth Stur|BOLD:AAB7294  
 Cricotopus tibialis|ATNA270|Elisabeth Stur|BOLD:AAB7294  
 Cricotopus tibialis|NO57|Elisabeth Stur|BOLD:AAB7294  
 Cricotopus tibialis|Finmark513|Elisabeth Stur|BOLD:AAB7294  
 Cricotopus villosus|Finmark474|Elisabeth Stur|Microscope|BOLD:ABA8476  
 Cricotopus villosus|Finmark469|Elisabeth Stur|Microscope|BOLD:ABA8476  
 Cricotopus sp. 26ES|Finmark255|Elisabeth Stur|Microscope|BOLD:ABX2654  
 Cricotopus pilosellus|Finmark133|Torbjorn Ekrem|BOLD:AAM6022  
 Cricotopus pilosellus|TRD-CH245|Elisabeth Stur|BOLD:AAG1016  
 Cricotopus pilosellus|ZMUO.024620|Lauri Paasivirta|BOLD:AAG1016  
 Cricotopus pilosellus|ZMUO.029777|Marko Mutanen|BOLD:AAG1016  
 Cricotopus polaris|ZMUO.024759|Lauri Paasivirta|BOLD:AAG1016  
 Cricotopus pilosellus|ZMUO.024619|Lauri Paasivirta|BOLD:AAG1016  
 Cricotopus polaris|ZMUO.024760|Lauri Paasivirta|BOLD:AAG1016  
 Cricotopus pilosellus|Finmark167|Elisabeth Stur|BOLD:AAG1016  
 Cricotopus pilosellus|Finmark473|Elisabeth Stur|BOLD:AAG1016  
 Cricotopus pilosellus|Finmark603|Elisabeth Stur|BOLD:AAG1016  
 Cricotopus sp. 2ES|ATNA271|Elisabeth Stur|BOLD:AAI6025  
 Cricotopus sp. 2ES|Finmark85|Elisabeth Stur|BOLD:AAI6025  
 Cricotopus sp. 2ES|Finmark341|Elisabeth Stur|BOLD:AAI6025  
 Cricotopus polaris|BIOUG15948-G01|Kate Perez|BIN Taxonomy Match|BOLD:ABA3997  
 Cricotopus polaris|Finmark723|Elisabeth Stur  
 Cricotopus|TRD-CH143|Elisabeth Stur|morphology|BOLD:ABA3997  
 Cricotopus polaris|Finmark127|Elisabeth Stur|BOLD:ABA3997  
 Cricotopus polaris|NO59|Elisabeth Stur|BOLD:ABA3997  
 Cricotopus|TRD-CH146|Elisabeth Stur|morphology|BOLD:ABA3997  
 Cricotopus|TRD-CH147|Elisabeth Stur|morphology|BOLD:ABA3997  
 Cricotopus polaris|BIOUG16256-B10|Kate Perez|BIN Taxonomy Match|BOLD:ABA3997  
 Cricotopus polaris|BIOUG16256-F05|Kate Perez|BIN Taxonomy Match|BOLD:ABA3997  
 Cricotopus|TRD-CH174|Elisabeth Stur|BOLD:ABA3997  
 Cricotopus polaris|NO58|Elisabeth Stur|BOLD:ABA3997  
 Cricotopus polaris|Finmark471|Susan E. Gresens|BOLD:AAV1706  
 Cricotopus polaris|Finmark477|Elisabeth Stur|BOLD:AAV1706  
 Cricotopus polaris|Finmark511|Elisabeth Stur  
 Cricotopus polaris|Finmark470|Elisabeth Stur  
 Cricotopus|TRD-CH145|Elisabeth Stur|morphology|BOLD:ACR2284  
 Cricotopus|TRD-CH144|Elisabeth Stur|morphology|BOLD:ACR2284  
 Cricotopus polaris|Finmark581|Elisabeth Stur|BOLD:ACG9064  
 Chironomidae|24415-C01|Mikko J Tiisänen|Tree based identification|BOLD:ACU4101  
 Geothocladius|Koz1236|Renee Miskie|BIN Taxonomy Match (May 2019)|BOLD:ACD9509  
 Geothocladius|BIOUG05104-F02|Kate Perez|BIN Taxonomy Match|BOLD:ACD9509  
 Geothocladius|BIOUG05141-F12|Kate Perez|BIN Taxonomy Match|BOLD:ACD9509  
 Geothocladius|BIOUG05108-A11|Kate Perez|BIN Taxonomy Match|BOLD:ACD9509  
 Geothocladius|BIOUG05101-F05|Kate Perez|BIN Taxonomy Match|BOLD:ACD9509  
 Geothocladius|BIOUG05105-D06|Kate Perez|BIN Taxonomy Match|BOLD:ACD9509  
 Geothocladius|BIOUG05105-B10|Kate Perez|BIN Taxonomy Match|BOLD:ACD9509  
 Geothocladius|BIOUG05104-D02|Kate Perez|BIN Taxonomy Match|BOLD:ACD9509  
 Geothocladius|BIOUG05103-A08|Kate Perez|BIN Taxonomy Match|BOLD:ACD9509  
 Geothocladius|BIOUG05143-G08|Kate Perez|BIN Taxonomy Match|BOLD:ACD9509  
 Geothocladius|BIOUG05101-F04|Kate Perez|BIN Taxonomy Match|BOLD:ACD9509  
 Geothocladius|BIOUG05105-F01|Kate Perez|BIN Taxonomy Match|BOLD:ACD9509  
 Geothocladius|BIOUG05141-C11|Kate Perez|BIN Taxonomy Match|BOLD:ACD9509  
 Geothocladius|BIOUG05102-A01|Kate Perez|BIN Taxonomy Match|BOLD:ACD9509  
 Geothocladius|BIOUG05101-B07|Kate Perez|BIN Taxonomy Match|BOLD:ACD9509  
 Geothocladius|BIOUG05141-B07|Kate Perez|BIN Taxonomy Match|BOLD:ACD9509  
 Geothocladius|BIOUG05104-B06|Kate Perez|BIN Taxonomy Match|BOLD:ACD9509  
 Geothocladius|BIOUG05102-H01|Kate Perez|BIN Taxonomy Match|BOLD:ACD9509  
 Geothocladius|BIOUG05102-A03|Kate Perez|BIN Taxonomy Match|BOLD:ACD9509  
 Geothocladius|BIOUG04795-H07|Kate Perez|BIN Taxonomy Match|BOLD:ACD9509  
 Geothocladius|BIOUG05106-H05|Kate Perez|BIN Taxonomy Match|BOLD:ACD9509  
 Geothocladius|BIOUG05106-D04|Kate Perez|BIN Taxonomy Match|BOLD:ACD9509  
 Chironomidae|BIOUG05109-C10|Meredith Miller|Tree-based Identification (Feb 2019)  
 Geothocladius|BIOUG05108-G09|Kate Perez|BIN Taxonomy Match|BOLD:ACD9509  
 Geothocladius|BIOUG05109-B08|Kate Perez|BIN Taxonomy Match|BOLD:ACD9509  
 Geothocladius|BIOUG05109-H04|Kate Perez|BIN Taxonomy Match|BOLD:ACD9509  
 Geothocladius|BIOUG05103-A10|Kate Perez|BIN Taxonomy Match|BOLD:ACD9509  
 Geothocladius|BIOUG05109-C06|Kate Perez|BIN Taxonomy Match|BOLD:ACD9509  
 Geothocladius|CCDB24183-A06|Sofia Wiedenbrug|Morphology|BOLD:ACD9509  
 Geothocladius|BIOUG05142-G05|Kate Perez|BIN Taxonomy Match|BOLD:ACD9509  
 Geothocladius|BIOUG05143-H02|Kate Perez|BIN Taxonomy Match|BOLD:ACD9509  
 Geothocladius|ZMUO.024531|Lauri Paasivirta|BOLD:ACD9509  
 Geothocladius|ZMUO.024530|Lauri Paasivirta|BOLD:ACD9509  
 Geothocladius|BIOUG05103-B03|Kate Perez|BIN Taxonomy Match|BOLD:ACD9509  
 Geothocladius|BIOUG05109-D01|Kate Perez|BIN Taxonomy Match|BOLD:ACD9509  
 Geothocladius|BIOUG05103-A07|Kate Perez|BIN Taxonomy Match|BOLD:ACD9509  
 Geothocladius|BIOUG05109-D12|Kate Perez|BIN Taxonomy Match|BOLD:ACD9509  
 Geothocladius|BIOUG04795-C04|Kate Perez|BIN Taxonomy Match|BOLD:ACD9509  
 Geothocladius|BIOUG05103-A12|Kate Perez|BIN Taxonomy Match|BOLD:ACD9509  
 Geothocladius|BIOUG05209-H07|Kate Perez|BIN Taxonomy Match|BOLD:ACD9509  
 Geothocladius|BIOUG04795-C03|Kate Perez|BIN Taxonomy Match|BOLD:ACD9509  
 Geothocladius|BIOUG05142-A11|Kate Perez|BIN Taxonomy Match|BOLD:ACD9509  
 Geothocladius|BIOUG05105-F08|Kate Perez|BIN Taxonomy Match|BOLD:ACD9509  
 Geothocladius|BIOUG05141-A12|Kate Perez|BIN Taxonomy Match|BOLD:ACD9509  
 Geothocladius|BIOUG05108-C09|Kate Perez|BIN Taxonomy Match|BOLD:ACD9509  
 Geothocladius|BIOUG05141-D05|Kate Perez|BIN Taxonomy Match|BOLD:ACD9509  
 Geothocladius|BIOUG05108-C06|Kate Perez|BIN Taxonomy Match|BOLD:ACD9509  
 Geothocladius|BIOUG05108-D08|Kate Perez|BIN Taxonomy Match|BOLD:ACD9509  
 Geothocladius|BIOUG05109-E11|Kate Perez|BIN Taxonomy Match|BOLD:ACD9509  
 Geothocladius|BIOUG05141-C03|Kate Perez|BIN Taxonomy Match|BOLD:ACD9509  
 Geothocladius|BIOUG05108-B01|Kate Perez|BIN Taxonomy Match|BOLD:ACD9509  
 Geothocladius|BIOUG05108-G02|Kate Perez|BIN Taxonomy Match|BOLD:ACD9509  
 Geothocladius|BIOUG05109-A01|Kate Perez|BIN Taxonomy Match|BOLD:ACD9509  
 Geothocladius|BIOUG05109-C05|Kate Perez|BIN Taxonomy Match|BOLD:ACD9509  
 Geothocladius|BIOUG05106-C10|Kate Perez|BIN Taxonomy Match|BOLD:ACD9509  
 Geothocladius|BIOUG05107-F07|Kate Perez|BIN Taxonomy Match|BOLD:ACD9509  
 Geothocladius|BIOUG05107-E11|Kate Perez|BIN Taxonomy Match|BOLD:ACD9509  
 Geothocladius|BIOUG05107-H02|Kate Perez|BIN Taxonomy Match|BOLD:ACD9509  
 Geothocladius|BIOUG05102-H06|Kate Perez|BIN Taxonomy Match|BOLD:ACD9509  
 Geothocladius|BIOUG05108-F05|Kate Perez|BIN Taxonomy Match|BOLD:ACD9509  
 Geothocladius|BIOUG05109-A09|Kate Perez|BIN Taxonomy Match|BOLD:ACD9509  
 Geothocladius|BIOUG05109-C09|Kate Perez|BIN Taxonomy Match|BOLD:ACD9509  
 Geothocladius|BIOUG05109-G11|Kate Perez|BIN Taxonomy Match|BOLD:ACD9509

Georhocladius|BIOUG05109-A09|Kate Perez|BIN Taxonomy Match|BOLD:ACD9509  
 Georhocladius|BIOUG05109-C09|Kate Perez|BIN Taxonomy Match|BOLD:ACD9509  
 Georhocladius|BIOUG05109-G11|Kate Perez|BIN Taxonomy Match|BOLD:ACD9509  
 Georhocladius|BIOUG05141-A04|Kate Perez|BIN Taxonomy Match|BOLD:ACD9509  
 Georhocladius|BIOUG05105-C01|Kate Perez|BIN Taxonomy Match|BOLD:ACD9509  
 Georhocladius|BIOUG05143-G02|Kate Perez|BIN Taxonomy Match|BOLD:ACD9509  
 Georhocladius|BIOUG05143-E05|Kate Perez|BIN Taxonomy Match|BOLD:ACD9509  
 Georhocladius|BIOUG05110-B03|Kate Perez|BIN Taxonomy Match|BOLD:ACD9509  
 Georhocladius|BIOUG05110-A10|Kate Perez|BIN Taxonomy Match|BOLD:ACD9509  
 Georhocladius|BIOUG05110-C04|Kate Perez|BIN Taxonomy Match|BOLD:ACD9509  
 Georhocladius|BIOUG05110-H11|Kate Perez|BIN Taxonomy Match|BOLD:ACD9509  
 Georhocladius|BIOUG04795-B12|Kate Perez|BIN Taxonomy Match|BOLD:ACD9509  
 Georhocladius|BIOUG05104-A05|Kate Perez|BIN Taxonomy Match|BOLD:ACD9509  
 Georhocladius|BIOUG05142-D12|Kate Perez|BIN Taxonomy Match|BOLD:ACD9509  
 Georhocladius|BIOUG05107-G01|Kate Perez|BIN Taxonomy Match|BOLD:ACD9509  
 Georhocladius|BIOUG05104-G03|Kate Perez|BIN Taxonomy Match|BOLD:ACD9509  
 Georhocladius|BIOUG05104-E02|Kate Perez|BIN Taxonomy Match|BOLD:ACD9509  
 Georhocladius|BIOUG05104-D11|Kate Perez|BIN Taxonomy Match|BOLD:ACD9509  
 Georhocladius|BIOUG05104-D07|Kate Perez|BIN Taxonomy Match|BOLD:ACD9509  
 Georhocladius|BIOUG05104-B12|Kate Perez|BIN Taxonomy Match|BOLD:ACD9509  
 Georhocladius|BIOUG05104-A07|Kate Perez|BIN Taxonomy Match|BOLD:ACD9509  
 Georhocladius|BIOUG04795-D06|Kate Perez|BIN Taxonomy Match|BOLD:ACD9509  
 Georhocladius|BIOUG04795-C08|Kate Perez|BIN Taxonomy Match|BOLD:ACD9509  
 Georhocladius|BIOUG05105-D10|Kate Perez|BIN Taxonomy Match|BOLD:ACD9509  
 Georhocladius|BIOUG05105-D02|Kate Perez|BIN Taxonomy Match|BOLD:ACD9509  
 Georhocladius|BIOUG05105-C05|Kate Perez|BIN Taxonomy Match|BOLD:ACD9509  
 Georhocladius|BIOUG05105-B07|Kate Perez|BIN Taxonomy Match|BOLD:ACD9509  
 Georhocladius|BIOUG05103-H08|Kate Perez|BIN Taxonomy Match|BOLD:ACD9509  
 Georhocladius|BIOUG05103-D03|Kate Perez|BIN Taxonomy Match|BOLD:ACD9509  
 Georhocladius|BIOUG05102-H11|Kate Perez|BIN Taxonomy Match|BOLD:ACD9509  
 Georhocladius|BIOUG05102-E05|Kate Perez|BIN Taxonomy Match|BOLD:ACD9509  
 Georhocladius|BIOUG05102-E03|Kate Perez|BIN Taxonomy Match|BOLD:ACD9509  
 Georhocladius|BIOUG05101-F07|Kate Perez|BIN Taxonomy Match|BOLD:ACD9509  
 Georhocladius|BIOUG05101-E11|Kate Perez|BIN Taxonomy Match|BOLD:ACD9509  
 Georhocladius|BIOUG05101-E04|Kate Perez|BIN Taxonomy Match|BOLD:ACD9509  
 Georhocladius|BIOUG05101-A01|Kate Perez|BIN Taxonomy Match|BOLD:ACD9509  
 Georhocladius|BIOUG04795-H11|Kate Perez|BIN Taxonomy Match|BOLD:ACD9509  
 Georhocladius|BIOUG05105-B02|Kate Perez|BIN Taxonomy Match|BOLD:ACD9509  
 Georhocladius|BIOUG05103-H10|Kate Perez|BIN Taxonomy Match|BOLD:ACD9509  
 Georhocladius|BIOUG04795-H05|Kate Perez|BIN Taxonomy Match|BOLD:ACD9509  
 Georhocladius|BIOUG04795-D12|Kate Perez|BIN Taxonomy Match|BOLD:ACD9509  
 Georhocladius|BIOUG04795-D09|Kate Perez|BIN Taxonomy Match|BOLD:ACD9509  
 Georhocladius|BIOUG05107-D04|Kate Perez|BIN Taxonomy Match|BOLD:ACD9509  
 Georhocladius|BIOUG05107-C12|Kate Perez|BIN Taxonomy Match|BOLD:ACD9509  
 Georhocladius|BIOUG05107-A05|Kate Perez|BIN Taxonomy Match|BOLD:ACD9509  
 Georhocladius|BIOUG05106-H02|Kate Perez|BIN Taxonomy Match|BOLD:ACD9509  
 Georhocladius|BIOUG05106-G06|Kate Perez|BIN Taxonomy Match|BOLD:ACD9509  
 Georhocladius|BIOUG05106-F06|Kate Perez|BIN Taxonomy Match|BOLD:ACD9509  
 Georhocladius|BIOUG05106-C09|Kate Perez|BIN Taxonomy Match|BOLD:ACD9509  
 Georhocladius|BIOUG05106-A11|Kate Perez|BIN Taxonomy Match|BOLD:ACD9509  
 Georhocladius|BIOUG05105-H06|Kate Perez|BIN Taxonomy Match|BOLD:ACD9509  
 Georhocladius|BIOUG05107-D12|Kate Perez|BIN Taxonomy Match|BOLD:ACD9509  
 Georhocladius|BIOUG05107-D09|Kate Perez|BIN Taxonomy Match|BOLD:ACD9509  
 Georhocladius|BIOUG05105-F11|Kate Perez|BIN Taxonomy Match|BOLD:ACD9509  
 Georhocladius|BIOUG05102-C07|Kate Perez|BIN Taxonomy Match|BOLD:ACD9509

Rheocricotopus atripes|ZSM-DIP-33137-B10|Caroline Chimenó|BIN Taxonomy Match (Jan 2022)|BOL...  
 Rheocricotopus atripes|CCDB21605-F02|Sofia Wiedenbrug|BOLD:AAD5902  
 Rheocricotopus atripes|ZSM-DIP-33141-H03|Caroline Chimenó|BIN Taxonomy Match (Jan 2022)|BOL...  
 Rheocricotopus atripes|ZSM-DIP-33137-B09|Caroline Chimenó|BIN Taxonomy Match (Jan 2022)|BOL...  
 Rheocricotopus atripes|ZSM-DIP-33139-D07|Caroline Chimenó|BIN Taxonomy Match (Jan 2022)|BOL...  
 Rheocricotopus atripes|ZSM-DIP-33139-D09|Caroline Chimenó|BIN Taxonomy Match (Jan 2022)|BOL...  
 Rheocricotopus atripes|ZSM-DIP-33139-H05|Caroline Chimenó|BIN Taxonomy Match (Jan 2022)|BOL...  
 Rheocricotopus atripes|GBOL11520|Sofia Wiedenbrug|Morphology|BOLD:AAD5902  
 Rheocricotopus atripes|GBOL11519|Sofia Wiedenbrug|Morphology|BOLD:AAD5902  
 Rheocricotopus atripes|CCDB21605-B06|Sofia Wiedenbrug|BOLD:AAD5902  
 Rheocricotopus atripes|CCDB21605-B08|Sofia Wiedenbrug|BOLD:AAD5902  
 Rheocricotopus atripes|GBOL11518|Sofia Wiedenbrug|Morphology|BOLD:AAD5902  
 Rheocricotopus atripes|ZSM-DIP-33131-G02|Caroline Chimenó|BIN Taxonomy Match (Jan 2022)|BOL...  
 Rheocricotopus atripes|ZSM-DIP-33137-A05|Caroline Chimenó|BIN Taxonomy Match (Jan 2022)|BOL...  
 Rheocricotopus atripes|ZSM-DIP-33148-A03|Caroline Chimenó|BIN Taxonomy Match (Jan 2022)|BOL...  
 Rheocricotopus atripes|ZSM-DIP-33139-D05|Caroline Chimenó|BIN Taxonomy Match (Jan 2022)|BOL...  
 Rheocricotopus atripes|ZSM-DIP-33139-D06|Caroline Chimenó|BIN Taxonomy Match (Jan 2022)|BOL...  
 Rheocricotopus atripes|ZSM-DIP-33139-E08|Caroline Chimenó|BIN Taxonomy Match (Jan 2022)|BOL...  
 Rheocricotopus atripes|ZSM-DIP-33140-C12|Caroline Chimenó|BIN Taxonomy Match (Jan 2022)|BOL...  
 Rheocricotopus atripes|ZSM-DIP-33140-D01|Caroline Chimenó|BIN Taxonomy Match (Jan 2022)|BOL...  
 Rheocricotopus atripes|GBOL11522|Sofia Wiedenbrug|BIN-taxonomy|BOLD:AAD5902  
 Rheocricotopus atripes|ZSM-DIP-33139-D08|Caroline Chimenó|BIN Taxonomy Match (Jan 2022)|BOL...  
 Rheocricotopus atripes|ZSM-DIP-33137-B07|Caroline Chimenó|BIN Taxonomy Match (Jan 2022)|BOL...  
 Rheocricotopus atripes|ZSM-DIP-33148-A04|Caroline Chimenó|BIN Taxonomy Match (Jan 2022)|BOL...  
 Rheocricotopus atripes|ZSM-DIP-33140-C01|Caroline Chimenó|BIN Taxonomy Match (Jan 2022)|BOL...  
 Rheocricotopus atripes|ZSM-DIP-33137-B08|Caroline Chimenó|BIN Taxonomy Match (Jan 2022)|BOL...  
 Rheocricotopus atripes|GBOL03745|Sofia Wiedenbrug|BOLD:AAD5902  
 Rheocricotopus atripes|CH-OSF154|Elisabeth Stur|BOLD:AAD5902  
 Rheocricotopus atripes|ZMUO.024838|Lauri Paasivirta|BOLD:AAD5902  
 Rheocricotopus atripes|ZMUO.024837|Lauri Paasivirta|BOLD:AAD5902  
 Rheocricotopus atripes|SOE98|Elisabeth Stur|BOLD:AAD5902  
 Rheocricotopus atripes|SOE134|Elisabeth Stur|BOLD:AAD5902  
 Rheocricotopus atripes|SOE259|Elisabeth Stur|BOLD:AAD5902  
 Rheocricotopus atripes|SOE219|Elisabeth Stur|BOLD:AAD5902  
 Rheocricotopus atripes|SOE176|Elisabeth Stur|BOLD:AAD5902  
 Rheocricotopus atripes|Finmark607|Elisabeth Stur|BOLD:AAD5902

Nanocladius balticus|ZMUO.025301|Lauri Paasivirta|BOLD:ADA3217

Nanocladius nr. balticus|ZMUO.024639|Lauri Paasivirta|BOLD:ADA3217

Orthoclaadiinae|BIOUG07760-F05|Kate Perez|BIN Taxonomy Match|BOLD:AAD9250

Pseudorthoclaadius filiformis|ZSM-DIP-33134-A08|Caroline Chimenó|BIN Taxonomy Match (Jan 2022) ...

Pseudorthoclaadius filiformis|ZSM-DIP-33148-A08|Caroline Chimenó|BIN Taxonomy Match (Jan 2022) ...

Pseudorthoclaadius filiformis|ZSM-DIP-33134-A09|Caroline Chimenó|BIN Taxonomy Match (Jan 2022) ...

Pseudorthoclaadius filiformis|ZSM-DIP-33134-A03|Caroline Chimenó|BIN Taxonomy Match (Jan 2022) ...

Pseudorthoclaadius filiformis|ZSM-DIP-33134-A10|Caroline Chimenó|BIN Taxonomy Match (Jan 2022) ...

Pseudorthoclaadius filiformis|ZSM-DIP-33148-A10|Caroline Chimenó|BIN Taxonomy Match (Jan 2022) ...

Pseudorthoclaadius filiformis|ZSM-DIP-33148-A11|Caroline Chimenó|BIN Taxonomy Match (Jan 2022) ...

Pseudorthoclaadius filiformis|ZSM-DIP-33170-F04|Caroline Chimenó|BIN Taxonomy Match (Jan 2022) ...

Pseudorthoclaadius filiformis|ZSM-DIP-33170-F07|Caroline Chimenó|BIN Taxonomy Match (Jan 2022) ...



Pseudorthocladus filiformis|ZSM-DIP-33148-A11|Caroline Chimeno|BIN Taxonomy Match (Jan 2022 ...  
Pseudorthocladus filiformis|ZSM-DIP-33170-F04|Caroline Chimeno|BIN Taxonomy Match (Jan 2022 ...  
Pseudorthocladus filiformis|ZSM-DIP-33170-F07|Caroline Chimeno|BIN Taxonomy Match (Jan 2022 ...  
Pseudorthocladus filiformis|ZSM-DIP-33170-G08|Caroline Chimeno|BIN Taxonomy Match (Jan 2022 ...  
Pseudorthocladus filiformis|ZSM-DIP-33170-G09|Caroline Chimeno|BIN Taxonomy Match (Jan 2022 ...  
Pseudorthocladus filiformis|ZSM-DIP-33170-G10|Caroline Chimeno|BIN Taxonomy Match (Jan 2022 ...  
Pseudorthocladus filiformis|ZSM-DIP-33170-H07|Caroline Chimeno|BIN Taxonomy Match (Jan 2022 ...  
Pseudorthocladus filiformis|ZSM-DIP-33170-H09|Caroline Chimeno|BIN Taxonomy Match (Jan 2022 ...  
Orthocladinae|BIOUG07757-B01|Kate Perez|BIN Taxonomy Match|BOLD: AAD9250  
Pseudorthocladus filiformis|ZSM-DIP-33148-A06|Caroline Chimeno|BIN Taxonomy Match (Jan 2022 ...  
Orthocladinae|BIOUG07566-D04|Kate Perez|BIN Taxonomy Match|BOLD: AAD9250  
Orthocladinae|BIOUG07566-G11|Kate Perez|BIN Taxonomy Match|BOLD: AAD9250  
Pseudorthocladus filiformis|ZSM-DIP-33148-A05|Caroline Chimeno|BIN Taxonomy Match (Jan 2022 ...  
Pseudorthocladus filiformis|ZSM-DIP-33148-H01|Caroline Chimeno|BIN Taxonomy Match (Jan 2022 ...  
Pseudorthocladus filiformis|BIOUG07415-B12|Kate Perez|BIN Taxonomy Match (May 2020)|BOLD ...  
Pseudorthocladus filiformis|SOE97|Elisabeth Stur|BOLD: AAD9250  
Pseudorthocladus filiformis|SOE429|Elisabeth Stur|BOLD: AAD9250  
Orthocladinae|BIOUG07753-G03|Kate Perez|BIN Taxonomy Match|BOLD: AAD9250  
Orthocladinae|BIOUG07755-E05|Kate Perez|BIN Taxonomy Match|BOLD: AAD9250  
Orthocladinae|BIOUG07568-D02|Kate Perez|BIN Taxonomy Match|BOLD: AAD9250  
Orthocladinae|BIOUG07568-F01|Kate Perez|BIN Taxonomy Match|BOLD: AAD9250  
Orthocladinae|BIOUG07807-G09|Kate Perez|BIN Taxonomy Match|BOLD: AAD9250  
Orthocladinae|BIOUG07509-H08|Kate Perez|BIN Taxonomy Match|BOLD: AAD9250  
Orthocladinae|BIOUG07503-A04|Kate Perez|BIN Taxonomy Match|BOLD: AAD9250  
Pseudorthocladus filiformis|SOE21|Elisabeth Stur|BOLD: AAD9250  
Pseudorthocladus filiformis|SOE242|Elisabeth Stur|BOLD: AAD9250  
Pseudorthocladus filiformis|SOE419|Elisabeth Stur|BOLD: AAD9250  
Pseudorthocladus cf. curtistylus|BIOUG06088-D07|Kate Perez|BIN Taxonomy Match|BOLD: ACG6805  
Pseudorthocladus cf. curtistylus|BIOUG07757-D04|Kate Perez|BIN Taxonomy Match|BOLD: ACG6805  
Pseudorthocladus cf. curtistylus|BIOUG07413-F08|Kate Perez|BIN Taxonomy Match|BOLD: ACG6805  
Pseudorthocladus cf. curtistylus|ZSM-DIP-33136-A07|Caroline Chimeno|BIN Taxonomy Match (Jan 2...  
Pseudorthocladus cf. curtistylus|BIOUG07647-G01|Kate Perez|BIN Taxonomy Match|BOLD: ACG6805  
Pseudorthocladus cf. curtistylus|BIOUG07415-C07|Kate Perez|BIN Taxonomy Match|BOLD: ACG6805  
Pseudorthocladus cf. curtistylus|ZSM-DIP-33133-H02|Caroline Chimeno|BIN Taxonomy Match (Jan 2...  
Pseudorthocladus cf. curtistylus|ZSM-DIP-33145-F04|Caroline Chimeno|BIN Taxonomy Match (Jan 2...  
Pseudorthocladus cf. curtistylus|ZSM-DIP-33145-F05|Caroline Chimeno|BIN Taxonomy Match (Jan 2...  
Pseudorthocladus cf. curtistylus|ZSM-DIP-33146-A09|Caroline Chimeno|BIN Taxonomy Match (Jan 2...  
Pseudorthocladus cf. curtistylus|ZSM-DIP-33148-D07|Caroline Chimeno|BIN Taxonomy Match (Jan 2...  
Pseudorthocladus cf. curtistylus|ZSM-DIP-33148-D08|Caroline Chimeno|BIN Taxonomy Match (Jan 2...  
Pseudorthocladus cf. curtistylus|ZSM-DIP-33149-A10|Caroline Chimeno|BIN Taxonomy Match (Jan 2...  
Pseudorthocladus cf. curtistylus|BIOUG07808-G10|Kate Perez|BIN Taxonomy Match|BOLD: ACG6805  
Pseudorthocladus cf. curtistylus|BIOUG07758-D12|Kate Perez|BIN Taxonomy Match|BOLD: ACG6805  
Pseudorthocladus cf. curtistylus|BIOUG07757-G06|Kate Perez|BIN Taxonomy Match|BOLD: ACG6805  
Pseudorthocladus cf. curtistylus|BIOUG08097-B11|Kate Perez|BIN Taxonomy Match|BOLD: ACG6805  
Pseudorthocladus cf. curtistylus|BIOUG07808-D11|Kate Perez|BIN Taxonomy Match|BOLD: ACG6805  
Pseudorthocladus cf. curtistylus|BIOUG07567-F02|Kate Perez|BIN Taxonomy Match|BOLD: ACG6805  
Pseudorthocladus cf. curtistylus|BIOUG07756-F07|Kate Perez|BIN Taxonomy Match|BOLD: ACG6805  
Pseudorthocladus cf. curtistylus|BIOUG07754-A12|Kate Perez|BIN Taxonomy Match|BOLD: ACG6805  
Pseudorthocladus cf. curtistylus|BIOUG06094-B04|Kate Perez|BIN Taxonomy Match|BOLD: ACG6805  
Pseudorthocladus cf. curtistylus|ZSM-DIP-33149-A08|Caroline Chimeno|BIN Taxonomy Match (Jan 2...  
Pseudorthocladus cf. curtistylus|BIOUG07759-F08|Kate Perez|BIN Taxonomy Match|BOLD: ACG6805  
Pseudorthocladus cf. curtistylus|BIOUG07753-G04|Kate Perez|BIN Taxonomy Match|BOLD: ACG6805  
Pseudorthocladus cf. curtistylus|BIOUG07567-A10|Kate Perez|BIN Taxonomy Match|BOLD: ACG6805  
Pseudorthocladus cf. curtistylus|BIOUG07945-C06|Kate Perez|BIN Taxonomy Match|BOLD: ACG6805  
Pseudorthocladus cf. curtistylus|BIOUG08138-H02|Kate Perez|BIN Taxonomy Match|BOLD: ACG6805  
Pseudorthocladus filiformis|ZMUO.025119|Lauri Paasivirta|BOLD: AAD9251  
Pseudorthocladus filiformis|SOE304|Elisabeth Stur|BOLD: AAD9251  
Pseudorthocladus filiformis|SOE378|Elisabeth Stur|BOLD: AAD9251  
Pseudorthocladus filiformis|ZMUO.025118|Lauri Paasivirta|BOLD: AAD9251  
Pseudorthocladus filiformis|BIOUG07808-F07|Kate Perez|BIN Taxonomy Match|BOLD: AAD9251  
Nanocladus balticus|ZMUO.025302|Lauri Paasivirta|BOLD: ADA3218  
Parakiefferiella coronata|ZMUO.024940|Lauri Paasivirta|BOLD: ADA6291  
Parakiefferiella coronata|ZMUO.025839|Lauri Paasivirta|BOLD: ADA6291  
Parakiefferiella coronata|ZMUO.025838|Lauri Paasivirta|BOLD: ADA6291  
Parakiefferiella coronata|ZMUO.024939|Lauri Paasivirta|BOLD: ADA6291  
Parakiefferiella coronata|Finmark678|Elisabeth Stur|BOLD: AAV2834  
Orthocladinae|GBOL03742|Sofia Wiedenbrug  
Chironomidae|CCDB21605-E01|Sofia Wiedenbrug  
Pseudorthocladus ABV3504|CCDB21605-E09|Sofia Wiedenbrug|BOLD: ABV3504  
Pseudorthocladus ABV3504|CCDB21605-E02|Sofia Wiedenbrug|BOLD: ABV3504  
Pseudorthocladus cf. curtistylus|TRD-CH195|Elisabeth Stur|BOLD: ABV3504  
Pseudorthocladus cf. curtistylus|BIOUG16256-C06|Elisabeth Stur|BIN Taxonomy Match|BOLD: ABV3504  
Pseudorthocladus|BIOUG36840-F12|Kate Perez|BIN Taxonomy Match (Jul 2018)|BOLD: ABV3504  
Pseudorthocladus|BIOUG42927-E12|Kate Perez|BIN Taxonomy Match below Phylum (Jun 2019)|BOLD...  
Pseudorthocladus cf. curtistylus|CH-OSF42|Elisabeth Stur|BOLD: ABV3504  
Pseudorthocladus|BIOUG36841-D02|Kate Perez|BIN Taxonomy Match (Jul 2018)|BOLD: ABV3504  
Pseudorthocladus|BIOUG42754-C09|Kate Perez|BIN Taxonomy Match below Phylum (Jun 2019)|BOLD...  
Pseudorthocladus|BIOUG42733-G02|Kate Perez|BIN Taxonomy Match below Phylum (Jun 2019)|BOLD...  
Pseudorthocladus ABV3504|BIOUG07757-A06|Kate Perez|BIN Taxonomy Match|BOLD: ABV3504  
Pseudorthocladus ABV3504|BIOUG07944-H01|Kate Perez|BIN Taxonomy Match|BOLD: ABV3504  
Pseudorthocladus|BIOUG07646-E06|Kate Perez|BIN Taxonomy Match|BOLD: ABV3504  
Pseudorthocladus curtistylus|ZSM-DIP-33170-F05|Caroline Chimeno|BIN Taxonomy Match (Jan 2022...  
Pseudorthocladus curtistylus|ZSM-DIP-33148-A07|Caroline Chimeno|BIN Taxonomy Match (Jan 2022...  
Pseudorthocladus cf. curtistylus|TRD-CH235|Elisabeth Stur|BOLD: ABV3504  
Pseudorthocladus curtistylus|NHRS-BYWS00000559|Yngve Brodin|morphology|BOLD: ABV3504  
Pseudorthocladus curtistylus|NHRS-BYWS00000462|Yngve Brodin|morphology|BOLD: ABV3504  
Pseudorthocladus cf. curtistylus|CH-eik65|Elisabeth Stur|BOLD: ABV3504  
Pseudorthocladus cf. curtistylus|CH-eik62|Elisabeth Stur|BOLD: ABV3504  
Pseudorthocladus|ZSM-DIP-33148-B03|Caroline Chimeno|BIN Taxonomy Match (Jan 2022)|BOLD:...  
Pseudorthocladus|ZSM-DIP-33139-G12|Caroline Chimeno|BIN Taxonomy Match (Jan 2022)|BOLD:...  
Pseudorthocladus curtistylus|NHRS-BYWS00000461|Yngve Brodin|morphology|BOLD: ABV3504  
Pseudorthocladus curtistylus|ZMUO.024943|Lauri Paasivirta|BOLD: ABV3504  
Pseudorthocladus ABV3504|BIOUG07406-C08|Kate Perez|BIN Taxonomy Match|BOLD: ABV3504  
Pseudorthocladus|BIOUG36992-G03|Kate Perez|BIN Taxonomy Match (Jul 2018)|BOLD: ABV3504  
Pseudorthocladus cf. curtistylus|CH-eik89|Elisabeth Stur|BOLD: ABV3504  
Pseudorthocladus cf. curtistylus|CH-eik112|Elisabeth Stur|BOLD: ABV3504  
Pseudorthocladus curtistylus|NHRS-BYWS00000933|Yngve Brodin|morphology|BOLD: ABV3504  
Pseudorthocladus curtistylus|ZSM-DIP-33148-A12|Caroline Chimeno|BIN Taxonomy Match (Jan 2022...  
Pseudorthocladus curtistylus|ZSM-DIP-33170-F09|Caroline Chimeno|BIN Taxonomy Match (Jan 2022...  
Pseudorthocladus ABV3504|BIOUG08129-B02|Kate Perez|BIN Taxonomy Match|BOLD: ABV3504  
Pseudorthocladus cf. curtistylus|BIOUG15793-E09|Elisabeth Stur|BIN Taxonomy Match|BOLD: ABV3504  
Pseudorthocladus ABV3504|BIOUG07809-F01|Kate Perez|BIN Taxonomy Match|BOLD: ABV3504

*Pseudorthocladus* ABV3504|BIOUG08129-B02|Kate Perez|BIN Taxonomy Match|BOLD:ABV3504  
*Pseudorthocladus* cf. *curtistylus*|BIOUG15793-E09|Elisabeth Stur|BIN Taxonomy Match|BOLD:ABV3504  
*Pseudorthocladus* ABV3504|BIOUG07809-F01|Kate Perez|BIN Taxonomy Match|BOLD:ABV3504  
*Pseudorthocladus* ABV3504|BIOUG08126-D08|Kate Perez|BIN Taxonomy Match|BOLD:ABV3504  
*Pseudorthocladus* *curtistylus*|ZSM-DIP-33170-H05|Caroline Chimento|BIN Taxonomy Match (Jan 2022)|BOLD:ABV3504  
*Pseudorthocladus*|BIOUG36762-A12|Kate Perez|BIN Taxonomy Match (May 2018)|BOLD:ABV3504  
*Pseudorthocladus* ABV3504|BIOUG07930-A12|Kate Perez|BIN Taxonomy Match|BOLD:ABV3504  
*Orthocladinae*|BIOUG36682-A02|Kate Perez|BIN Taxonomy Match (Jul 2018)|BOLD:ACF9345  
*Allocladius* *nanseni*|Finmark439|Elisabeth Stur|BOLD:AAL1593  
*Nanocladius* *distinctus*|NHRs-BYWS00000923|Yngve Brodin|morphology|BOLD:ACC9943  
*Psectrocladius* *oxuralis*|ZSM-DIP-33129-D12|Valerie Levesque-Beaudin|BOLD ID Engine Manual (Sep 20...)|BOLD:AEG1130  
*Psectrocladius* *limbatellus*|NHRs-BYWS000001163|Yngve Brodin|morphology|BOLD:AEG1130  
*Psectrocladius* *limbatellus*|NHRs-BYWS00000435|Yngve Brodin|morphology|BOLD:AEG1130  
*Psectrocladius* *limbatellus*|NHRs-BYWS000001802|Yngve Brodin|BOLD:AEG1130  
*Psectrocladius* *limbatellus*|NHRs-BYWS000000964|Yngve Brodin|morphology|BOLD:AAU0273  
*Psectrocladius* *ventricosus*|ZMUO.025354|Lauri Paasivirta|BOLD:AAU0273  
*Psectrocladius* *limbatellus*|NHRs-BYWS000000220|Yngve Brodin|morphology|BOLD:AAU0273  
*Psectrocladius* *limbatellus*|NHRs-BYWS000000965|Yngve Brodin|morphology|BOLD:AAU0273  
*Psectrocladius* *limbatellus*|NHRs-BYWS000000575|Yngve Brodin|morphology|BOLD:AAU0273  
*Psectrocladius* *limbatellus*|NHRs-BYWS000000165|Yngve Brodin|morphology|BOLD:AAU0273  
*Psectrocladius* *limbatellus*|NHRs-BYWS000001863|Yngve Brodin|BOLD:AAU0273  
*Psectrocladius* *limbatellus*|NHRs-BYWS000000222|Yngve Brodin|morphology|BOLD:AAU0273  
*Psectrocladius* *limbatellus*|NHRs-BYWS000000221|Yngve Brodin|morphology|BOLD:AAU0273  
*Psectrocladius* *limbatellus*|NHRs-BYWS000000385|Yngve Brodin|morphology|BOLD:AAU0273  
*Psectrocladius* *limbatellus*|NHRs-BYWS000000338|Yngve Brodin|morphology|BOLD:AAU0273  
*Psectrocladius* *limbatellus*|NHRs-BYWS000000412|Yngve Brodin|morphology|BOLD:AAU0273  
*Psectrocladius* *limbatellus*|NHRs-BYWS000001745|Yngve Brodin|BOLD:AAU0273  
*Psectrocladius* *limbatellus*|NHRs-BYWS000001744|Yngve Brodin|BOLD:AAU0273  
*Psectrocladius* *limbatellus*|NHRs-BYWS000001036|Yngve Brodin|morphology|BOLD:AAU0273  
*Psectrocladius* *limbatellus*|NHRs-BYWS000001871|Yngve Brodin|BOLD:AAU0273  
*Psectrocladius* *limbatellus*|NHRs-BYWS000001743|Yngve Brodin|BOLD:AAU0273  
*Psectrocladius* *limbatellus*|NHRs-BYWS000000373|Yngve Brodin|morphology|BOLD:AAU0273  
*Psectrocladius* *limbatellus*|NHRs-BYWS000000226|Yngve Brodin|morphology|BOLD:AAU0273  
*Psectrocladius* *ventricosus*|ZMUO.025353|Lauri Paasivirta|BOLD:AAU0273  
*Psectrocladius* *limbatellus*|NHRs-BYWS000000374|Yngve Brodin|morphology|BOLD:AAU0273  
*Psectrocladius* *limbatellus*|NHRs-BYWS000000219|Yngve Brodin|morphology|BOLD:AAU0273  
*Psectrocladius* *ventricosus*|EJV-20110232|Lauri Paasivirta|BOLD:AAU0273  
*Psectrocladius*|ZMUO.026019|Lauri Paasivirta|BOLD:AAD0483  
*Psectrocladius*|ZMUO.026018|Lauri Paasivirta|BOLD:AAD0483  
*Psectrocladius* *barbimanus*|Finmark113|Elisabeth Stur|BOLD:AAD0483  
*Psectrocladius* *barbimanus*|NHRs-BYWS000000502|Yngve Brodin|morphology|BOLD:AAU6335  
*Psectrocladius* *barbimanus*|NHRs-BYWS000001858|Yngve Brodin|BOLD:AAU6335  
*Rheocricotopus* *chapmani*|24465-B05|Kate Perez|BIN Taxonomy Match|BOLD:AAI0295  
*Rheocricotopus* *chapmani*|ZMUO.026092|Lauri Paasivirta|BOLD:AAI0295  
*Rheocricotopus* *chapmani*|24373-E06|Kate Perez|BIN Taxonomy Match|BOLD:AAI0295  
*Rheocricotopus* *chapmani*|24354-B10|Kate Perez|BIN Taxonomy Match|BOLD:AAI0295  
*Rheocricotopus* *chapmani*|ATNA294|Elisabeth Stur|BOLD:AAI0295  
*Rheocricotopus* *chapmani*|ATNA262|Elisabeth Stur|BOLD:AAI0295  
*Rheocricotopus* nr. *unidentatus*|ZMUO.024793|Lauri Paasivirta|BOLD:ADA5961  
*Rheocricotopus*|ZMUO.025951|Lauri Paasivirta|BOLD:ADA5962  
*Rheocricotopus* nr. *unidentatus*|ZMUO.024792|Lauri Paasivirta|BOLD:ADA5962  
*Rheocricotopus*|ZMUO.025950|Lauri Paasivirta|BOLD:ADA5962  
*Rheocricotopus*|ZSM-DIP-33137-B06|Caroline Chimento|BIN Taxonomy Match (Jan 2022)|BOLD:ADY...  
*Rheocricotopus* sp. 3ES|BC-ZSM-DIP-22488-E11|Dieter Doczkal|BOLD:ADY9601  
*Rheocricotopus* sp. 3ES|CCDB24183-F12|Sofia Wiedenbrug|Morphology|BOLD:AE5575  
*Rheocricotopus* sp. 3ES|TRD-CH273|Elisabeth Stur|BOLD:AAB3290  
*Rheocricotopus* sp. 3ES|EBAI-Ch076|Elisabeth Stur|morphology|BOLD:AAB3290  
*Rheocricotopus* sp. 3ES|EBAI-Ch079|Elisabeth Stur|morphology|BOLD:AAB3290  
*Rheocricotopus* sp. 3ES|EBAI-Ch077|Elisabeth Stur|morphology|BOLD:AAB3290  
*Rheocricotopus* sp. 3ES|EBAI-Ch081|Elisabeth Stur|morphology|BOLD:AAB3290  
*Rheocricotopus* sp. 3ES|EBAI-Ch080|Elisabeth Stur|morphology|BOLD:AAB3290  
*Rheocricotopus* sp. 3ES|ATNA467|Elisabeth Stur|BOLD:AAB3290  
*Rheocricotopus* sp. 3ES|SOE327|Torbjorn Ekrem|BOLD:AAB3290  
*Rheocricotopus* *effusus*|ZMUO.024723|Lauri Paasivirta|BOLD:AAB3288  
*Chironomidae*|CCDB22605-B10|Sofia Wiedenbrug|no morphological identification - introduction of int...  
*Chironomidae*|GBOL11540|Sofia Wiedenbrug|no morphological identification - introduction of interim...  
*Chironomidae*|CCDB21606-A09|Sofia Wiedenbrug|no morphological identification - introduction of int...  
*Rheocricotopus* *effusus*|ZMUO.024722|Lauri Paasivirta|BOLD:ACH2822  
*Rheocricotopus* *effusus*|ZSM-DIP-33139-E10|Caroline Chimento|BIN Taxonomy Match (Jan 2022)|BOL...  
*Rheocricotopus* *effusus*|ZSM-DIP-33137-B03|Caroline Chimento|BIN Taxonomy Match (Jan 2022)|BOL...  
*Rheocricotopus* *effusus*|ZSM-DIP-33131-G07|Caroline Chimento|BIN Taxonomy Match (Jan 2022)|BOL...  
*Chironomidae*|BC-ZSM-DIP-22488-D05|Dieter Doczkal|no morphological identification - introduction of int...  
*Chironomidae*|CCDB24228-D10|Sofia Wiedenbrug|no morphological identification - introduction of int...  
*Chironomidae*|CCDB24038-H06|Sofia Wiedenbrug|no morphological identification - introduction of int...  
*Chironomidae*|CCDB24038-H05|Sofia Wiedenbrug|no morphological identification - introduction of int...  
*Chironomidae*|CCDB24038-G10|Sofia Wiedenbrug|no morphological identification - introduction of int...  
*Chironomidae*|BIOUG07406-H06|Kate Perez|no morphological identification - introduction of interim ...  
*Rheocricotopus* *effusus*|ZSM-DIP-33131-G06|Caroline Chimento|BIN Taxonomy Match (Jan 2022)|BOL...  
*Rheocricotopus* *effusus*|BIOUG05897-H09|Kate Perez|BIN Taxonomy Match|BOLD:AAB3288  
*Chironomidae*|BIOUG07807-D08|Meredith Miller|Tree-based Identification (Feb 2019)  
*Rheocricotopus* *effusus*|Finmark147|Elisabeth Stur|BOLD:AAB3288  
*Rheocricotopus* *effusus*|SOE458|Torbjorn Ekrem|BOLD:AAB3288  
*Rheocricotopus* *effusus*|CCDB24183-G12|Sofia Wiedenbrug|Morphology|BOLD:AAB3288  
*Rheocricotopus* *effusus*|ES108|Elisabeth Stur|BOLD:AAB3288  
*Rheocricotopus* *effusus*|ES12|Elisabeth Stur|BOLD:AAB3288  
*Rheocricotopus* *effusus*|ES11|Elisabeth Stur|BOLD:AAB3288  
*Rheocricotopus* *effusus*|SOE456|Torbjorn Ekrem|BOLD:AAB3288  
*Rheocricotopus* *effusus*|SOE399|Torbjorn Ekrem|BOLD:AAB3288  
*Rheocricotopus* *effusus*|ES110|Elisabeth Stur|BOLD:AAB3288  
*Rheocricotopus* *effusus*|SOE410|Torbjorn Ekrem|BOLD:AAB3288  
*Rheocricotopus* *effusus*|SOE405|Torbjorn Ekrem|BOLD:AAB3288  
*Rheocricotopus* *effusus*|SOE396|Torbjorn Ekrem|BOLD:AAB3288  
*Rheocricotopus* *effusus*|SOE474|Torbjorn Ekrem|BOLD:AAB3288  
*Rheocricotopus* *effusus*|ATNA148|Elisabeth Stur|BOLD:AAB3288  
*Rheocricotopus* *effusus*|SOE179|Elisabeth Stur|BOLD:AAB3288  
*Rheocricotopus* *effusus*|SOE199|Elisabeth Stur|BOLD:AAB3288  
*Rheocricotopus* *effusus*|SOE149|Elisabeth Stur|BOLD:AAB3288  
*Rheocricotopus* *effusus*|SOE77|Elisabeth Stur|BOLD:AAB3288  
*Rheocricotopus* *effusus*|SOE308|Torbjorn Ekrem|BOLD:AAB3288  
*Rheocricotopus* *effusus*|SOE148|Elisabeth Stur|BOLD:AAB3288  
*Rheocricotopus* *effusus*|SOE251|Elisabeth Stur|BOLD:AAB3288  
*Rheocricotopus* *effusus*|EBAI-Ch078|Elisabeth Stur|morphology|BOLD:AAB3288  
*Rheocricotopus* *effusus*|ATNA347|Elisabeth Stur|BOLD:AAB3288

Rheocricotopus effusus|SOE251|Elisabeth Stur|BOLD:AAB3288  
 Rheocricotopus effusus|EBAL-Ch078|Elisabeth Stur|morphology|BOLD:AAB3288  
 Rheocricotopus effusus|ATNA347|Elisabeth Stur|BOLD:AAB3288  
 Rheocricotopus effusus|SOE409|Elisabeth Stur|BOLD:AAB3288  
 Rheocricotopus effusus|SOE404|Torbjorn Ekrem|BOLD:AAB3288  
 Rheocricotopus effusus|SOE395|Torbjorn Ekrem|BOLD:AAB3288  
 Rheocricotopus effusus|ATNA477|Elisabeth Stur|BOLD:AAB3288  
 Rheocricotopus sp. 2ES|Finmark466|Elisabeth Stur|BOLD:AAV2321  
 Orthocladinae|BIOUG15654-E04|Kate Perez|BOLD ID Engine Manual|BOLD:ACL2710  
 Orthocladinae|BIOUG16626-E09|Kate Perez|BOLD ID Engine Manual|BOLD:ACL2710  
 Orthocladinae|BIOUG36844-B04|Kate Perez|BIN Taxonomy Match (Jul 2018)|BOLD:ACL2710  
 Orthocladinae|BIOUG16434-G06|Kate Perez|BOLD ID Engine Manual|BOLD:ACL2710  
 Orthocladinae|BIOUG15457-D02|Kate Perez|BOLD ID Engine Manual|BOLD:ACL2710  
 Orthocladinae|BIOUG16551-D09|Kate Perez|BOLD ID Engine Manual|BOLD:ACL2710  
 Chironomidae|BIOUG43081-F01|Kate Perez|BIN Taxonomy Match (Jul 2019)|BOLD:ADU7549  
 Chironomidae|BIOUG43080-C10|Kate Perez|BIN Taxonomy Match (Jul 2019)|BOLD:ADU7549  
 Chironomidae|BIOUG42966-H06|Kate Perez|BIN Taxonomy Match (Jul 2019)|BOLD:ADU7549  
 Chironomidae|BIOUG42966-B06|Kate Perez|BIN Taxonomy Match (Jul 2019)|BOLD:ADU7549  
 Chironomidae|BIOUG42964-C02|Kate Perez|BIN Taxonomy Match (Jul 2019)|BOLD:ADU7549  
 Chironomidae|BIOUG42959-F03|Kate Perez|BIN Taxonomy Match (Jul 2019)|BOLD:ADU7549  
 Chironomidae|BIOUG43076-H01|Kate Perez|BIN Taxonomy Match (Jul 2019)|BOLD:ADU7549  
 Chironomidae|BIOUG55104-E02|Stefan Schmidt|BIN Taxonomy Match (Sep 2020)|BOLD:ADU7549  
 Smittia edwardsi|NO26|Torbjorn Ekrem|BOLD:AAF4817  
 Smittia edwardsi|BIOUG43075-C09|Kate Perez|BIN Taxonomy Match below Phylum (Jul 2019)|BOLD...  
 Smittia edwardsi|CH-OSF150|Elisabeth Stur|BOLD:ADV7271  
 Smittia edwardsi|ZMUO.024591|Lauri Paasivirta|BOLD:ADV7271  
 Smittia edwardsi|ZSM-DIP-33131-E06|Caroline Chimento|BIN Taxonomy Match (Jan 2022)|BOLD:A...  
 Smittia edwardsi|ZSM-DIP-33170-C12|Caroline Chimento|BIN Taxonomy Match (Jan 2022)|BOLD:A...  
 Smittia edwardsi|BC-ZSM-DIP-22551-F06|Dieter Doczkal|BOLD:ADV7271  
 Smittia edwardsi|BIOUG42965-A07|Kate Perez|BIN Taxonomy Match below Phylum (Jul 2019)|BOLD...  
 Smittia edwardsi|BIOUG42961-B11|Kate Perez|BIN Taxonomy Match below Phylum (Jul 2019)|BOLD...  
 Smittia edwardsi|BIOUG42960-F11|Kate Perez|BIN Taxonomy Match below Phylum (Jul 2019)|BOLD...  
 Smittia edwardsi|BIOUG42960-D02|Kate Perez|BIN Taxonomy Match below Phylum (Jul 2019)|BOLD...  
 Smittia edwardsi|NHRS-BYWS000001017|Yngve Brodin|morphology|BOLD:ADV7271  
 Smittia edwardsi|ZMUO.024590|Lauri Paasivirta|BOLD:ADV7271  
 Smittia edwardsi|ZSM-DIP-33131-D04|Caroline Chimento|BIN Taxonomy Match (Jan 2022)|BOLD:A...  
 Smittia edwardsi|NHRS-BYWS000001056|Yngve Brodin|morphology|BOLD:ADV7271  
 Smittia edwardsi|NHRS-BYWS00000966|Yngve Brodin|morphology|BOLD:ADV7271  
 Smittia edwardsi|TRD-CH415|Elisabeth Stur|morphology|BOLD:ADV7271  
 Smittia edwardsi|ATNA578|Elisabeth Stur|morphology|BOLD:ADV7271  
 Smittia edwardsi|BIOUG16436-A05|Kate Perez|BIN Taxonomy Match|BOLD:ADV7271  
 Smittia edwardsi|BIOUG15456-B04|Kate Perez|BIN Taxonomy Match|BOLD:ADV7271  
 Chironomidae|24371-D06|Mikko J Tiisanen|Tree based identification|BOLD:ACU5354  
 Chironomidae|24373-C05|Mikko J Tiisanen|Tree based identification|BOLD:ACU5354  
 Chironomidae|24371-D09|Mikko J Tiisanen|Tree based identification|BOLD:ACU5354  
 Chironomidae|24465-D04|Mikko J Tiisanen|Tree based identification|BOLD:ACU5354  
 Chironomidae|24373-F11|Mikko J Tiisanen|Tree based identification|BOLD:ACU5354  
 Chironomidae|24354-E10|Mikko J Tiisanen|Tree based identification|BOLD:ACU5354  
 Chironomidae|24354-B02|Mikko J Tiisanen|Tree based identification|BOLD:ACU5354  
 Chironomidae|23878-H05|Mikko J Tiisanen|Tree based identification|BOLD:ACU5354  
 Chironomidae|24354-B04|Mikko J Tiisanen|Tree based identification|BOLD:ACU5354  
 Chironomidae|24354-B08|Mikko J Tiisanen|Tree based identification|BOLD:ACU5354  
 Chironomidae|23878-F03|Mikko J Tiisanen|Tree based identification|BOLD:ACU5354  
 Chironomidae|23975-B05|Mikko J Tiisanen|Tree based identification|BOLD:ACU5354  
 Chironomidae|24373-F08|Mikko J Tiisanen|Tree based identification|BOLD:ACU5354  
 Chironomidae|24373-G04|Mikko J Tiisanen|Tree based identification|BOLD:ACU5354  
 Chironomidae|24373-A04|Mikko J Tiisanen|Tree based identification|BOLD:ACU5354  
 Chironomidae|24372-F07|Mikko J Tiisanen|Tree based identification|BOLD:ACU5354  
 Chironomidae|24372-C05|Mikko J Tiisanen|Tree based identification|BOLD:ACU5354  
 Chironomidae|24372-C04|Mikko J Tiisanen|Tree based identification|BOLD:ACU5354  
 Chironomidae|24464-D05|Mikko J Tiisanen|Tree based identification|BOLD:ACU5354  
 Chironomidae|24371-C06|Mikko J Tiisanen|Tree based identification|BOLD:ACU5354  
 Chironomidae|24372-H11|Mikko J Tiisanen|Tree based identification|BOLD:ACU5354  
 Chironomidae|24354-E02|Mikko J Tiisanen|Tree based identification|BOLD:ACU5354  
 Chironomidae|24371-A07|Mikko J Tiisanen|Tree based identification|BOLD:ACU5354  
 Chironomidae|24465-F01|Mikko J Tiisanen|Tree based identification|BOLD:ACU5354  
 Chironomidae|24465-E09|Mikko J Tiisanen|Tree based identification|BOLD:ACU5354  
 Chironomidae|23975-A11|Mikko J Tiisanen|Tree based identification|BOLD:ACU5354  
 Chironomidae|23878-G08|Mikko J Tiisanen|Tree based identification|BOLD:ACU5354  
 Chironomidae|23878-F04|Mikko J Tiisanen|Tree based identification|BOLD:ACU5354  
 Chironomidae|25131-F04|Kate Perez|BOLD ID Engine Manual (Apr 2018)|BOLD:ACU5354  
 Chironomidae|25130-G04|Kate Perez|BOLD ID Engine Manual (Apr 2018)|BOLD:ACU5353  
 Chironomidae|23878-F07|Mikko J Tiisanen|Tree based identification|BOLD:ACU5353  
 Chironomidae|24354-E12|Mikko J Tiisanen|Tree based identification|BOLD:ACU5353  
 Chironomidae|25128-B06|Kate Perez|BIN Taxonomy Match (Mar 2018)|BOLD:ACU5353  
 Chironomidae|25131-G06|Kate Perez|BOLD ID Engine Manual (Apr 2018)|BOLD:ACU5353  
 Chironomidae|25130-C01|Kate Perez|BOLD ID Engine Manual (Apr 2018)|BOLD:ACU5353  
 Chironomidae|25128-H07|Kate Perez|BIN Taxonomy Match (Mar 2018)|BOLD:ACU5353  
 Chironomidae|25131-C07|Kate Perez|BOLD ID Engine Manual (Apr 2018)|BOLD:ACU5353  
 Chironomidae|25130-H01|Kate Perez|BOLD ID Engine Manual (Apr 2018)|BOLD:ACU5353  
 Chironomidae|25131-F09|Kate Perez|BOLD ID Engine Manual (Apr 2018)|BOLD:ACU5353  
 Chironomidae|25130-B01|Kate Perez|BOLD ID Engine Manual (Apr 2018)|BOLD:ACU5353  
 Chironomidae|25132-D08|Kate Perez|BOLD ID Engine Manual (Apr 2018)|BOLD:ACU5353  
 Chironomidae|25130-E02|Kate Perez|BOLD ID Engine Manual (Apr 2018)|BOLD:ACU5353  
 Chironomidae|24465-G04|Mikko J Tiisanen|Tree based identification|BOLD:ACU5353  
 Chironomidae|25128-C07|Kate Perez|BIN Taxonomy Match (Mar 2018)|BOLD:ACU5353  
 Chironomidae|25131-E07|Kate Perez|BOLD ID Engine Manual (Apr 2018)|BOLD:ACU5353  
 Chironomidae|25128-A10|Kate Perez|BIN Taxonomy Match (Mar 2018)|BOLD:ACU5353  
 Chironomidae|25129-H03|Kate Perez|BIN Taxonomy Match (Mar 2018)|BOLD:ACU5353  
 Chironomidae|25132-D12|Kate Perez|BOLD ID Engine Manual (Apr 2018)|BOLD:ACU5353  
 Chironomidae|25132-H09|Kate Perez|BOLD ID Engine Manual (Apr 2018)|BOLD:ACU5353  
 Chironomidae|25130-E09|Kate Perez|BOLD ID Engine Manual (Apr 2018)|BOLD:ACU5353  
 Chironomidae|25129-B11|Kate Perez|BIN Taxonomy Match (Mar 2018)|BOLD:ACU5353  
 Chironomidae|25128-D05|Kate Perez|BIN Taxonomy Match (Mar 2018)|BOLD:ACU5353  
 Chironomidae|25129-C04|Kate Perez|BIN Taxonomy Match (Mar 2018)|BOLD:ACU5353  
 Chironomidae|25129-G11|Kate Perez|BIN Taxonomy Match (Mar 2018)|BOLD:ACU5353  
 Chironomidae|25128-G04|Kate Perez|BIN Taxonomy Match (Mar 2018)|BOLD:ACU5353  
 Smittia edwardsi|ATNA237|Elisabeth Stur|BOLD:AAF4818  
 Smittia edwardsi|ATNA238|Elisabeth Stur|BOLD:ACN5734  
 Smittia edwardsi|ATNA392|Elisabeth Stur  
 Chironomidae|BIOUG08132-G04|Kate Perez|no morphological identification - introduction of interim ...  
 Chironomidae|BIOUG08132-E07|Kate Perez|no morphological identification - introduction of interim ...  
 Chironomidae|BIOUG05109-D05|Kate Perez|no morphological identification - introduction of interim ...

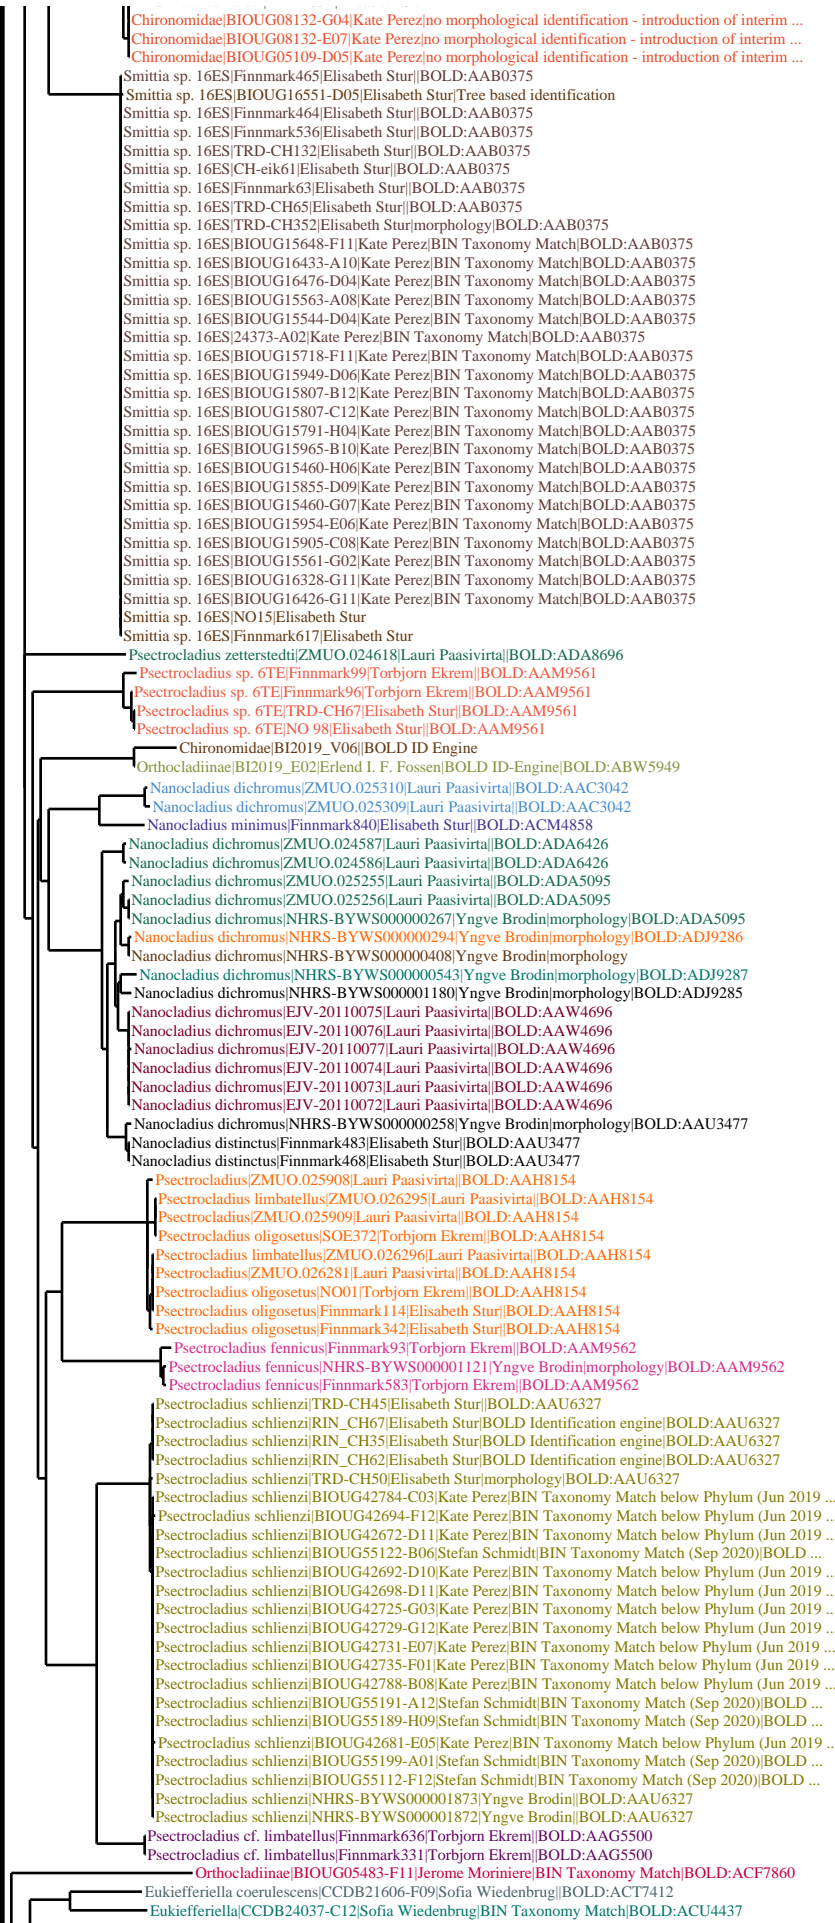

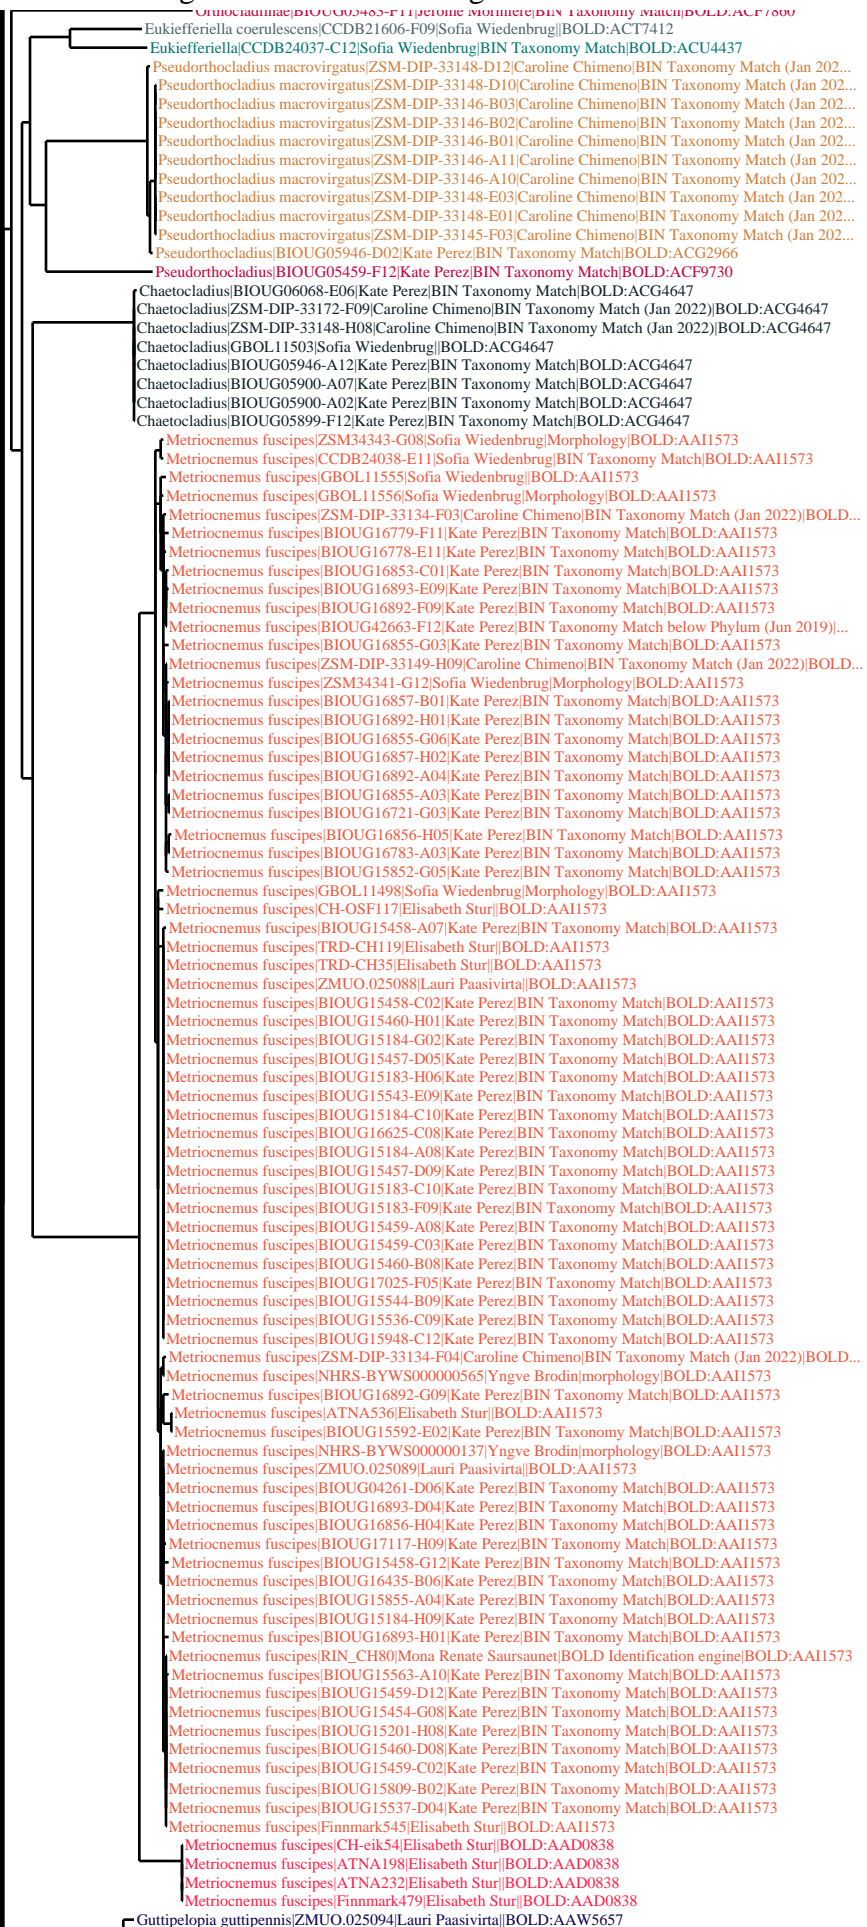

Metriocnemus fuscipes|ATNA232|Elisabeth Stur|BOLD:AAD0838  
 Metriocnemus fuscipes|Finmark479|Elisabeth Stur|BOLD:AAD0838  
 Guttipielopia guttipennis|ZMUO.025094|Lauri Paasivirta|BOLD:AAW5657  
 Guttipielopia guttipennis|TRD-CH366|Elisabeth Stur|morphology|BOLD:AAW5657  
 Guttipielopia guttipennis|TRD-CH365|Elisabeth Stur|morphology|BOLD:AAW5657  
 Guttipielopia guttipennis|TRD-CH6|Elisabeth Stur|BOLD:AAW5657  
 Guttipielopia guttipennis|RIN\_CH76|Mona Renate Saurasunet|BOLD Identification engine|BOLD:AAW5657  
 Guttipielopia guttipennis|RIN\_CH75|Mona Renate Saurasunet|BOLD Identification engine|BOLD:AAW5657  
 Guttipielopia guttipennis|RIN\_CH74|Mona Renate Saurasunet|BOLD Identification engine|BOLD:AAW5657  
 Guttipielopia guttipennis|RIN\_CH73|Mona Renate Saurasunet|BOLD Identification engine|BOLD:AAW5657  
 Guttipielopia guttipennis|RIN\_CH33|Mona Renate Saurasunet|BOLD Identification engine|BOLD:AAW5657  
 Guttipielopia guttipennis|TRD-CH32|Elisabeth Stur|BOLD:AAW5657  
 Guttipielopia guttipennis|ZMUO.025095|Lauri Paasivirta|BOLD:AAW5657  
 Guttipielopia guttipennis|EJV-20110020|Lauri Paasivirta|BOLD:AAW5657  
 Guttipielopia guttipennis|EJV-20110018|Lauri Paasivirta|BOLD:AAW5657  
 Chironomidae|BIOUG42676-A12|Kate Perez|BOLD ID Engine Manual below Phylum (Jul 2019)|BOLD ...  
 Rheopelopia ornata|ZMUO.025205|Lauri Paasivirta|BOLD:ADA5174  
 Rheopelopia ornata|ZMUO.025204|Lauri Paasivirta|BOLD:ADA4590  
 Xenopelopia falcigera|NHRS-BYWS000000329|Yngve Brodin|morphology|BOLD:ADJ7967  
 Xenopelopia falcigera|NHRS-BYWS000000328|Yngve Brodin|morphology|BOLD:ADJ7967  
 Xenopelopia nigricans|ZMUO.024659|Lauri Paasivirta|BOLD:ADA6313  
 Xenopelopia nigricans|ZSM-DIP-33139-H02|Caroline Chimeno|BIN Taxonomy Match (Jan 2022)|BOLD...  
 Xenopelopia nigricans|ZMUO.024658|Lauri Paasivirta|BOLD:ADA6313  
 Xenopelopia nigricans|NHRS-BYWS000000455|Yngve Brodin|morphology|BOLD:ADA6313  
 Krenopelopia|Finmark703|Elisabeth Stur|BOLD:AAAC9199  
 Krenopelopia|CCDB22605-A10|Sofia Wiedenbrug|BIN Taxonomy Match|BOLD:AAZ1682  
 Krenopelopia sp.|ZSM-DIP-33149-F11|Caroline Chimeno|BIN Taxonomy Match (Jan 2022)|BOLD:A...  
 Krenopelopia sp.|ES295|Elisabeth Stur|BOLD:AAZ1682  
 Krenopelopia|CCDB21606-G01|Sofia Wiedenbrug|BIN Taxonomy Match|BOLD:ACT5787  
 Krenopelopia|CH-eik26|Elisabeth Stur|BOLD:AAI2213  
 Krenopelopia|ZSM34341-D10|Sofia Wiedenbrug|Morphology|BOLD:AAI2213  
 Krenopelopia|BIOUG05898-E07|Kate Perez|BIN Taxonomy Match|BOLD:AAI2213  
 Krenopelopia sp.|SOE158|Elisabeth Stur|BOLD:AAI2213  
 Krenopelopia sp.|SOE151|Elisabeth Stur|BOLD:AAI2213  
 Krenopelopia|CH-eik134|Elisabeth Stur|BOLD:AAI2213  
 Krenopelopia sp.|SOE157|Elisabeth Stur|BOLD:AAI2213  
 Krenopelopia|ATNA332|Elisabeth Stur|BOLD:AAI2213  
 Krenopelopia|CH-eik27|Elisabeth Stur|BOLD:AAI2213  
 Krenopelopia|CCDB24183-D05|Sofia Wiedenbrug|Morphology|BOLD:AAI2213  
 Krenopelopia|CCDB21606-E05|Sofia Wiedenbrug|BIN Taxonomy Match|BOLD:AAI2213  
 Krenopelopia binotata|ZSM-DIP-33138-E10|Caroline Chimeno|BIN Taxonomy Match (Jan 2022)|BOLD...  
 Krenopelopia binotata|ZMUO.025847|Lauri Paasivirta|BOLD:AAI2213  
 Krenopelopia binotata|ZMUO.025848|Lauri Paasivirta|BOLD:AAI2213  
 Krenopelopia binotata|ZSM-DIP-33143-D05|Caroline Chimeno|BIN Taxonomy Match (Jan 2022)|BOLD...  
 Krenopelopia binotata|ZSM-DIP-33137-A03|Caroline Chimeno|BIN Taxonomy Match (Jan 2022)|BOLD...  
 Krenopelopia|ATNA337|Elisabeth Stur|BOLD:AAI2213  
 Krenopelopia|BIOUG05217-F06|Kate Perez|BIN Taxonomy Match|BOLD:AAI2213  
 Krenopelopia|BIOUG36655-A02|Kate Perez|BIN Taxonomy Match (Jul 2018)|BOLD:AAI2213  
 Krenopelopia|BIOUG36932-A12|Kate Perez|BIN Taxonomy Match (Jul 2018)|BOLD:AAI2213  
 Krenopelopia|BIOUG36775-H11|Kate Perez|BIN Taxonomy Match (Jul 2018)|BOLD:AAI2213  
 Krenopelopia|CCDB24228-C07|Sofia Wiedenbrug|BIN Taxonomy Match|BOLD:AAI2213  
 Krenopelopia|CCDB24228-H08|Sofia Wiedenbrug|BIN Taxonomy Match|BOLD:AAI2213  
 Krenopelopia sp.|SOE42|Elisabeth Stur  
 Krenopelopia|CCDB22603-E01|Sofia Wiedenbrug|BOLD:ACQ3154  
 Krenopelopia sp.|SOE487|Torbjorn Ekrem  
 Krenopelopia|BIOUG05776-H05|Kate Perez|BIN Taxonomy Match|BOLD:AAI2213  
 Krenopelopia|BIOUG06051-E03|Kate Perez|BIN Taxonomy Match|BOLD:AAI2213  
 Krenopelopia|BIOUG06055-H11|Kate Perez|BIN Taxonomy Match|BOLD:AAI2213  
 Krenopelopia sp.|ZSM34342-E11|Sofia Wiedenbrug|Morphology|BOLD:AAAC9198  
 Krenopelopia sp.|CCDB24183-H02|Sofia Wiedenbrug|BIN-taxonomy|BOLD:AAAC9198  
 Krenopelopia sp.|CCDB24183-C04|Sofia Wiedenbrug|Morphology|BOLD:AAAC9198  
 Krenopelopia|CH-eik106|Elisabeth Stur|BOLD:AAAC9198  
 Krenopelopia|ATNA336|Elisabeth Stur|BOLD:AAAC9198  
 Krenopelopia sp.|CCDB24183-B12|Sofia Wiedenbrug|BIN-taxonomy|BOLD:AAAC9198  
 Krenopelopia sp.|CCDB24183-H01|Sofia Wiedenbrug|Morphology|BOLD:AAAC9198  
 Krenopelopia|ATNA557|Elisabeth Stur|BOLD:AAAC9198  
 Krenopelopia sp.|CCDB21606-H04|Sofia Wiedenbrug|BIN Taxonomy Match|BOLD:AAAC9198  
 Krenopelopia sp.|CCDB21606-H07|Sofia Wiedenbrug|BIN Taxonomy Match|BOLD:AAAC9198  
 Krenopelopia sp.|SOE82|Torbjorn Ekrem|BOLD:AAAC9198  
 Krenopelopia|CH-OSF34|Torbjorn Ekrem|BOLD:AAAC9198  
 Krenopelopia|ATNA73|Elisabeth Stur|BOLD:AAAC9198  
 Krenopelopia binotata|ZMUO.024796|Lauri Paasivirta|BOLD:AAAC9198  
 Krenopelopia binotata|ZMUO.024797|Lauri Paasivirta|BOLD:AAAC9198  
 Krenopelopia sp.|BIOUG05898-E11|Kate Perez|BIN Taxonomy Match|BOLD:AAAC9198  
 Krenopelopia sp.|BIOUG06053-D01|Kate Perez|BIN Taxonomy Match|BOLD:AAAC9198  
 Krenopelopia sp.|BIOUG06052-B01|Kate Perez|BIN Taxonomy Match|BOLD:AAAC9198  
 Krenopelopia sp.|BIOUG06051-H10|Kate Perez|BIN Taxonomy Match|BOLD:AAAC9198  
 Krenopelopia sp.|ES76|Elisabeth Stur|BOLD:AAAC9196  
 Krenopelopia|BIOUG07509-H03|Kate Perez|BIN Taxonomy Match|BOLD:AAAC9196  
 Krenopelopia|BIOUG06052-F05|Kate Perez|BIN Taxonomy Match|BOLD:AAAC9196  
 Krenopelopia sp.|SOE216|Elisabeth Stur|BOLD:AAAC9197  
 Krenopelopia|CH-OSF173|Elisabeth Stur|BOLD:AAAC9197  
 Krenopelopia sp.|SOE17|Elisabeth Stur|BOLD:AAAC9197  
 Krenopelopia|BIOUG05947-B07|Kate Perez|BIN Taxonomy Match|BOLD:AAAC9197  
 Trissopelopia longimanus|ZMUO.025295|Lauri Paasivirta|BOLD:AAW7942  
 Trissopelopia longimanus|ZMUO.025294|Lauri Paasivirta|BOLD:AAW7942  
 Trissopelopia longimanus|BIOUG43948-A02|Kate Perez|BIN Taxonomy Match below Phylum (Jan 2019 ...  
 Trissopelopia longimanus|Finmark783|Elisabeth Stur|BOLD:AAW7942  
 Trissopelopia longimanus|SOE273|Torbjorn Ekrem|BOLD:AAW7942  
 Trissopelopia cf. flavida|Finmark784|Elisabeth Stur|BOLD:AAE7957  
 Trissopelopia cf. flavida|SOE385|Elisabeth Stur|BOLD:AAE7957  
 Trissopelopia cf. flavida|ES199|Elisabeth Stur|BOLD:AAE7957  
 Trissopelopia cf. flavida|Finmark888|Elisabeth Stur|BOLD:AAE7957  
 Trissopelopia cf. flavida|ES200|Elisabeth Stur|BOLD:AAE7957  
 Trissopelopia cf. flavida|SOE268|Elisabeth Stur|BOLD:AAE7957  
 Arctopelopia griseipennis|ZMUO.026161|Lauri Paasivirta|BOLD:ACQ1819  
 Arctopelopia griseipennis|ZMUO.026160|Lauri Paasivirta|BOLD:ACQ1819  
 Arctopelopia griseipennis|NHRS-BYWS000001179|Yngve Brodin|morphology|BOLD:ACQ1819  
 Arctopelopia griseipennis|NHRS-BYWS000001173|Yngve Brodin|morphology|BOLD:ACQ1819  
 Arctopelopia griseipennis|NHRS-BYWS000000128|Yngve Brodin|morphology|BOLD:ACQ1819  
 Tanypodinae|GBOL03710|Jerome Moriniere|BIN Taxonomy Match|BOLD:ACQ1819  
 Chironomidae|ZSM-DIP-33145-G05|Valerie Levesque-Beaudin|BOLD ID Engine Manual (Sep 2021)|BO...  
 Chironomidae|ZSM-DIP-33128-H04|Valerie Levesque-Beaudin|BIN Taxonomy Match (Sep 2021)|BOLD...

Tanypodinae[GBOL03710]Jerome Moriniere|BIN Taxonomy Match|BOLD:ÄCQ1819  
Chironomidae[ZSM-DIP-33145-G05]Valerie Levesque-Beaudin|BOLD ID Engine Manual (Sep 2021)|BO...  
Chironomidae[ZSM-DIP-33128-H04]Valerie Levesque-Beaudin|BIN Taxonomy Match (Sep 2021)|BOLD...  
Zavrelimyia cingulata|NHRS-BYWS000001061|Yngve Brodin|morphology|BOLD:AA5805  
Zavrelimyia cingulata|TRD-CH76|Elisabeth Stur|BOLD:AA5805  
Zavrelimyia cingulata|TRD-CH66|Elisabeth Stur|BOLD:AA5805  
Zavrelimyia cingulata|Finmark659|Elisabeth Stur|BOLD:AA5805  
Zavrelimyia cingulata|Finmark181|Elisabeth Stur|BOLD:AA5805  
Zavrelimyia cingulata|Finmark218|Elisabeth Stur|BOLD:AA5805  
Zavrelimyia cingulata|Finmark217|Elisabeth Stur|BOLD:AA5805  
Zavrelimyia cingulata|Finmark510|Elisabeth Stur|BOLD:AA5805  
Zavrelimyia cingulata|NHRS-BYWS000000330|Yngve Brodin|morphology|BOLD:ACY4814  
Zavrelimyia cingulata|TRD-CH428|Elisabeth Stur|morphology|BOLD:ACY4814  
Zavrelimyia cingulata|NO 94|Elisabeth Stur|BOLD:ACY4814  
Ablabesmyia longistyla|ZSM-DIP-33172-E09|Caroline Chimento|BIN Taxonomy Match (Jan 2022)|BOL...  
Ablabesmyia longistyla|TRD-CH185|Elisabeth Stur|morphology|BOLD:ACT6922  
Ablabesmyia longistyla|ZSM-DIP-33139-H10|Caroline Chimento|BIN Taxonomy Match (Jan 2022)|BOL...  
Ablabesmyia longistyla|ZMUO.024972|Lauri Paasivirta|BOLD:ADA6194  
Ablabesmyia longistyla|ZMUO.024973|Lauri Paasivirta|BOLD:ADA6194  
Ablabesmyia NHRS sp. A|NHRS-BYWS000001060|Yngve Brodin|morphology|BOLD:ADA6194  
Ablabesmyia sp. 3ES|TRD-CH291|Elisabeth Stur|morphology|BOLD:AAW4816  
Ablabesmyia longistyla|EJV-20110120|Lauri Paasivirta|BOLD:AAW4816  
Ablabesmyia longistyla|ZSM-DIP-33128-H05|Caroline Chimento|BIN Taxonomy Match (Jan 2022)|BOL...  
Ablabesmyia longistyla|ZSM-DIP-33134-E01|Caroline Chimento|BIN Taxonomy Match (Jan 2022)|BOL...  
Ablabesmyia longistyla|ZSM-DIP-33139-H11|Caroline Chimento|BIN Taxonomy Match (Jan 2022)|BOL...  
Ablabesmyia longistyla|ZSM-DIP-33128-H01|Caroline Chimento|BIN Taxonomy Match (Jan 2022)|BOL...  
Ablabesmyia longistyla|ZSM-DIP-33128-H02|Caroline Chimento|BIN Taxonomy Match (Jan 2022)|BOL...  
Ablabesmyia longistyla|ZSM-DIP-33134-D12|Caroline Chimento|BIN Taxonomy Match (Jan 2022)|BOL...  
Ablabesmyia longistyla|EJV-20110119|Lauri Paasivirta|BOLD:AAW4816  
Ablabesmyia longistyla|NHRS-BYWS000000302|Yngve Brodin|morphology|BOLD:AAW4816  
Ablabesmyia longistyla|NHRS-BYWS000000301|Yngve Brodin|morphology|BOLD:AAW4816  
Ablabesmyia longistyla|NHRS-BYWS000000238|Yngve Brodin|morphology|BOLD:AAW4816  
Ablabesmyia longistyla|NHRS-BYWS000000452|Yngve Brodin|morphology|BOLD:AAW4816  
Ablabesmyia longistyla|NHRS-BYWS000000453|Yngve Brodin|morphology|BOLD:AAW4816  
Ablabesmyia longistyla|EJV-20110118|Lauri Paasivirta|BOLD:AAW4816  
Ablabesmyia longistyla|ZSM-DIP-33128-G12|Caroline Chimento|BIN Taxonomy Match (Jan 2022)|BOL...  
Ablabesmyia longistyla|Finmark120|Elisabeth Stur|BOLD:AAM5707  
Zavrelimyia schineri|NHRS-BYWS000000320|Yngve Brodin|morphology|BOLD:ADK7718  
Zavrelimyia schineri|NHRS-BYWS000000319|Yngve Brodin|morphology|BOLD:ADK7718  
Labrundinia longipalpis|ZMUO.025300|Lauri Paasivirta|BOLD:ADA4045  
Labrundinia longipalpis|ZMUO.025299|Lauri Paasivirta|BOLD:ADA4045  
Larsia atrocincta|ZMUO.025290|Lauri Paasivirta|BOLD:ACT6621  
Larsia atrocincta|ZMUO.025289|Lauri Paasivirta|BOLD:ACT6621  
Larsia atrocincta|TRD-CH215|Elisabeth Stur|morphology|BOLD:ACT6621  
Ablabesmyia sp. 2ES|TRD-CH7|Elisabeth Stur|morphology|BOLD:ACK3818  
Ablabesmyia phatta|ZMUO.025267|Lauri Paasivirta|BOLD:ABZ1582  
Ablabesmyia phatta|ZMUO.025268|Lauri Paasivirta|BOLD:ACE6563  
Ablabesmyia sp. 1ES|Finmark462|Elisabeth Stur|BOLD:ACE6563  
Ablabesmyia sp. 1ES|Finmark103|Elisabeth Stur|BOLD:ACE6563  
Ablabesmyia sp. 1ES|TRD-CH39|Elisabeth Stur|morphology|BOLD:ACE6563  
Ablabesmyia sp. 1ES|Finmark345|Elisabeth Stur|BOLD:ACE6563  
Ablabesmyia sp. 4ES|Finmark629|Elisabeth Stur|BOLD:ACE6563  
Ablabesmyia aspera|ATNA539|Elisabeth Stur|BOLD:AAF3626  
Ablabesmyia aspera|ZSM-DIP-33148-D02|Caroline Chimento|BIN Taxonomy Match (Jan 2022)|BOLD ...  
Ablabesmyia aspera|ZSM-DIP-33146-A08|Caroline Chimento|BIN Taxonomy Match (Jan 2022)|BOLD ...  
Ablabesmyia aspera|ZSM-DIP-33145-E07|Caroline Chimento|BIN Taxonomy Match (Jan 2022)|BOLD ...  
Ablabesmyia aspera|ZSM-DIP-33145-E06|Caroline Chimento|BIN Taxonomy Match (Jan 2022)|BOLD ...  
Ablabesmyia aspera|ZSM-DIP-33149-B02|Caroline Chimento|BIN Taxonomy Match (Jan 2022)|BOLD ...  
Ablabesmyia aspera|ZSM-DIP-33149-B01|Caroline Chimento|BIN Taxonomy Match (Jan 2022)|BOLD ...  
Ablabesmyia aspera|ZSM-DIP-33148-D03|Caroline Chimento|BIN Taxonomy Match (Jan 2022)|BOLD ...  
Ablabesmyia aspera|ZSM-DIP-33135-C01|Caroline Chimento|BIN Taxonomy Match (Jan 2022)|BOLD ...  
Ablabesmyia aspera|CH-OSF172|Elisabeth Stur|BOLD:AAF3626  
Ablabesmyia aspera|SOE94|Torbjorn Ekrem|BOLD:AAF3626  
Ablabesmyia aspera|CH-OSF174|Elisabeth Stur|BOLD:AAF3626  
Ablabesmyia monilis|ZMUO.024272|Lauri Paasivirta|BOLD:ACE5418  
Ablabesmyia monilis|TRD-CH427|Elisabeth Stur|morphology|BOLD:ACE5418  
Ablabesmyia monilis|ZMUO.024271|Lauri Paasivirta|BOLD:ACE5418  
Ablabesmyia monilis|NO 92|Elisabeth Stur|BOLD:ACE5418  
Ablabesmyia monilis|ZSM-DIP-33128-H06|Caroline Chimento|BIN Taxonomy Match (Jan 2022)|BOLD ...  
Ablabesmyia monilis|ZSM-DIP-33129-E08|Caroline Chimento|BIN Taxonomy Match (Jan 2022)|BOLD ...  
Ablabesmyia monilis|ZSM-DIP-33147-C08|Caroline Chimento|BIN Taxonomy Match (Jan 2022)|BOLD ...  
Ablabesmyia monilis|BIOUG36779-A03|Kate Perez|BIN Taxonomy Match (May 2018)|BOLD:AAU0774  
Ablabesmyia monilis|TRD-CH308|Elisabeth Stur|BOLD:AAU0774  
Ablabesmyia monilis|RIN\_CH30|Mona Renate Saurasunet|BOLD Identification engine|BOLD:AAU0774  
Ablabesmyia monilis|RIN\_CH29|Mona Renate Saurasunet|BOLD Identification engine|BOLD:AAU0774  
Ablabesmyia monilis|TRD-CH309|Elisabeth Stur|BOLD:AAU0774  
Ablabesmyia monilis|TRD-CH292|Elisabeth Stur|BOLD:AAU0774  
Ablabesmyia monilis|TRD-CH221|Elisabeth Stur|BOLD:AAU0774  
Ablabesmyia monilis|TRD-CH8|Elisabeth Stur|BOLD:AAU0774  
Ablabesmyia monilis|Finmark458|Elisabeth Stur|BOLD:AAU0774  
Ablabesmyia monilis|NO 104|Elisabeth Stur|BOLD:AAU0774  
Ablabesmyia monilis|ZSM-DIP-33146-G09|Caroline Chimento|BIN Taxonomy Match (Jan 2022)|BOLD ...  
Ablabesmyia monilis|ZSM-DIP-33149-C08|Caroline Chimento|BIN Taxonomy Match (Jan 2022)|BOLD ...  
Ablabesmyia monilis|ZSM-DIP-33145-D02|Caroline Chimento|BIN Taxonomy Match (Jan 2022)|BOLD ...  
Ablabesmyia monilis|ZSM-DIP-33141-G01|Caroline Chimento|BIN Taxonomy Match (Jan 2022)|BOLD ...  
Ablabesmyia monilis|ZSM-DIP-33144-A09|Caroline Chimento|BIN Taxonomy Match (Jan 2022)|BOLD ...  
Ablabesmyia monilis|ZSM-DIP-33135-G06|Caroline Chimento|BIN Taxonomy Match (Jan 2022)|BOLD ...  
Ablabesmyia monilis|MW136316|BOLD:ABY9333  
Ablabesmyia monilis|Finmark721|Elisabeth Stur|BOLD:ABY9333  
Ablabesmyia monilis|Finmark214|Elisabeth Stur|BOLD:ABY9333  
Ablabesmyia monilis|Finmark213|Elisabeth Stur|BOLD:ABY9333  
Ablabesmyia monilis|Finmark508|Elisabeth Stur|BOLD:ABY9333  
Ablabesmyia monilis|Finmark258|Elisabeth Stur|BOLD:ABY9333  
Ablabesmyia monilis|NHRS-BYWS000000566|Yngve Brodin|morphology|BOLD:AAF3633  
Ablabesmyia monilis|NHRS-BYWS000000454|Yngve Brodin|morphology|BOLD:AAF3633  
Ablabesmyia monilis|NHRS-BYWS000000317|Yngve Brodin|morphology|BOLD:AAF3633  
Ablabesmyia monilis|EJV-20110085|Lauri Paasivirta|BOLD:AAF3633  
Ablabesmyia monilis|EJV-20110088|Lauri Paasivirta|BOLD:AAF3633  
Ablabesmyia monilis|EJV-20110087|Lauri Paasivirta|BOLD:AAF3633  
Ablabesmyia monilis|EJV-20110086|Lauri Paasivirta|BOLD:AAF3633  
Ablabesmyia monilis|EJV-20110084|Lauri Paasivirta|BOLD:AAF3633  
Ablabesmyia monilis|RIN\_CH32|Mona Renate Saurasunet|BOLD Identification engine|BOLD:AAF3633  
Ablabesmyia monilis|RIN\_CH30|Mona Renate Saurasunet|BOLD Identification engine|BOLD:AAF3633

Ablabesmyia monilis|EJV-20110084|Lauri Paasivirta||BOLD:AAF3633  
 Ablabesmyia monilis|RIN\_CH32|Mona Renate Saurasunet|BOLD Identification engine|BOLD:AAF3633  
 Ablabesmyia monilis|RIN\_CH50|Mona Renate Saurasunet|BOLD Identification engine|BOLD:AAF3633  
 Ablabesmyia monilis|ATNA330|Elisabeth Sturj|BOLD:AAF3633  
 Ablabesmyia monilis|TRD-CH158|Elisabeth Sturj|morphology|BOLD:AAF3633  
 Ablabesmyia monilis|NHRS-BYWS00000445|Yngve Brodin|morphology|BOLD:AAF3633  
 Ablabesmyia monilis|NHRS-BYWS00000318|Yngve Brodin|morphology|BOLD:AAF3633  
 Ablabesmyia monilis|ATNA538|Elisabeth Sturj|BOLD:AAF3633  
 Ablabesmyia monilis|NHRS-BYWS00000190|Yngve Brodin|morphology|BOLD:AAF3633  
 Ablabesmyia monilis|RIN\_CH34|Mona Renate Saurasunet|BOLD Identification engine|BOLD:AAF3633  
 Ablabesmyia monilis|RIN\_CH15|Mona Renate Saurasunet|BOLD Identification engine|BOLD:AAF3633  
 Ablabesmyia monilis|TRD-CH325|Elisabeth Sturj|BOLD:AAF3633  
 Ablabesmyia monilis|SOE9|Elisabeth Sturj|BOLD:AAF3633  
 Ablabesmyia monilis|RIN\_CH13|Mona Renate Saurasunet|BOLD Identification engine|BOLD:AAF3633  
 Ablabesmyia monilis|SOE10|Elisabeth Sturj|BOLD:AAF3633  
 Ablabesmyia monilis|Finmark568|Elisabeth Sturj|BOLD:AAF3633  
 Telopelopia fascigera|ZMUO.026154|Lauri Paasivirta||BOLD:ADF0409  
 Telopelopia fascigera|ZMUO.026153|Lauri Paasivirta||BOLD:ADF0409  
 Rheopelopia sp. 1ES|ATNA371|Elisabeth Sturj|BOLD:AAG2945  
 Rheopelopia sp. 1ES|TRD-CH324|Elisabeth Sturj|BOLD:AAG2945  
 Rheopelopia sp. 1ES|BIOUG16328-C02|Kate Perez|BIN Taxonomy Match|BOLD:AAG2945  
 Rheopelopia sp. 1ES|BIOUG16435-D10|Kate Perez|BIN Taxonomy Match|BOLD:AAG2945  
 Rheopelopia sp. 1ES|BIOUG16258-C10|Kate Perez|BIN Taxonomy Match|BOLD:AAG2945  
 Rheopelopia sp. 1ES|BIOUG16477-E09|Kate Perez|BIN Taxonomy Match|BOLD:AAG2945  
 Rheopelopia sp. 1ES|BIOUG15953-E06|Elisabeth Sturj|BIN Taxonomy Match|BOLD:AAG2945  
 Rheopelopia sp. 1ES|BIOUG15952-E01|Kate Perez|BIN Taxonomy Match|BOLD:AAG2945  
 Rheopelopia sp. 1ES|BIOUG15952-C03|Kate Perez|BIN Taxonomy Match|BOLD:AAG2945  
 Rheopelopia sp. 1ES|BIOUG15949-B04|Kate Perez|BIN Taxonomy Match|BOLD:AAG2945  
 Rheopelopia sp. 1ES|Finmark270|Elisabeth Sturj|BOLD:AAG2945  
 Telmatopelopia nemorum|ZMUO.024805|Lauri Paasivirta||BOLD:ADA5560  
 Telmatopelopia nemorum|ZMUO.024806|Lauri Paasivirta||BOLD:ADA5560  
 Telmatopelopia nemorum|NHRS-BYWS000001131|Yngve Brodin|morphology|BOLD:ADA5560  
 Chironomidae|ZSM-DIP-33129-F06|Valerie Levesque-Beaudin|BIN Taxonomy Match (Sep 2021)|BOLD...  
 Chironomidae|ZSM-DIP-33129-E11|Valerie Levesque-Beaudin|BIN Taxonomy Match (Sep 2021)|BOLD...  
 Chironomidae|ZSM-DIP-33149-E04|Valerie Levesque-Beaudin|BIN Taxonomy Match (Sep 2021)|BOLD...  
 Chironomidae|ZSM-DIP-33144-E10|Valerie Levesque-Beaudin|BIN Taxonomy Match (Sep 2021)|BOLD...  
 Chironomidae|ZSM-DIP-33139-A04|Valerie Levesque-Beaudin|BIN Taxonomy Match (Sep 2021)|BOLD...  
 Chironomidae|ZSM-DIP-33144-G12|Valerie Levesque-Beaudin|BIN Taxonomy Match (Sep 2021)|BOLD...  
 Chironomidae|ZSM-DIP-33149-E05|Valerie Levesque-Beaudin|BIN Taxonomy Match (Sep 2021)|BOLD...  
 Chironomidae|ZSM-DIP-33147-D06|Valerie Levesque-Beaudin|BIN Taxonomy Match (Sep 2021)|BOLD...  
 Chironomidae|ZSM-DIP-33147-D05|Valerie Levesque-Beaudin|BIN Taxonomy Match (Sep 2021)|BOLD...  
 Chironomidae|ZSM-DIP-33144-E05|Valerie Levesque-Beaudin|BIN Taxonomy Match (Sep 2021)|BOLD...  
 Chironomidae|ZSM-DIP-33128-A04|Valerie Levesque-Beaudin|BIN Taxonomy Match (Sep 2021)|BOLD...  
 Chironomidae|ZSM-DIP-33144-E04|Valerie Levesque-Beaudin|BIN Taxonomy Match (Sep 2021)|BOLD...  
 Chironomidae|ZSM-DIP-33147-F03|Valerie Levesque-Beaudin|BIN Taxonomy Match (Sep 2021)|BOLD...  
 Chironomidae|ZSM-DIP-33144-B11|Valerie Levesque-Beaudin|BOLD ID Engine Manual (Sep 2021)|BO...  
 Zavrelimyia nr. barbatipes|ZMUO.024601|Lauri Paasivirta||BOLD:ACM5292  
 Zavrelimyia nr. barbatipes|ZMUO.024600|Lauri Paasivirta||BOLD:ACM5292  
 Zavrelimyia nr. melanura|ZMUO.024893|Lauri Paasivirta||BOLD:ACM5292  
 Zavrelimyia sp. 3ES|TRD-CH75|Elisabeth Sturj|morphology|BOLD:ACM5292  
 Zavrelimyia nr. barbatipes|ZMUO.024891|Lauri Paasivirta||BOLD:AAV2699  
 Zavrelimyia nr. barbatipes|ZSM-DIP-33172-E08|Caroline Chimeno|BIN Taxonomy Match (Jan 2022)...  
 Zavrelimyia|ZSM-DIP-33172-E07|Caroline Chimeno|BIN Taxonomy Match (Jan 2022)|BOLD:AAV2699  
 Zavrelimyia nr. barbatipes|ZSM-DIP-33172-E06|Caroline Chimeno|BIN Taxonomy Match (Jan 2022)...  
 Zavrelimyia sp. 1ES|TRD-CH393|Elisabeth Sturj|morphology|BOLD:AAV2699  
 Zavrelimyia|BIOUG43949-H04|Kate Perez|BIN Taxonomy Match below Phylum (Jan 2019)|BOLD:AA...  
 Zavrelimyia sp. 1ES|Finmark754|G. A. Halvorsen||BOLD:AAV2699  
 Zavrelimyia sp. 1ES|CH-OSF116|Elisabeth Sturj|BOLD:AAV2699  
 Zavrelimyia sp. 2ES|SOE272|Elisabeth Sturj|BOLD:AAG2011  
 Zavrelimyia nr. barbatipes|ZMUO.024890|Lauri Paasivirta||BOLD:AAG2011  
 Zavrelimyia sp. 2ES|CH-OSF163|Elisabeth Sturj|BOLD:AAG2011  
 Zavrelimyia sp. 2ES|SOE271|Elisabeth Sturj|BOLD:AAG2011  
 Zavrelimyia melanura|ZSM-DIP-33149-D02|Caroline Chimeno|BIN Taxonomy Match (Jan 2022)|BOLD...  
 Zavrelimyia melanura|ZSM-DIP-33130-F06|Caroline Chimeno|BIN Taxonomy Match (Jan 2022)|BOLD...  
 Zavrelimyia melanura|ZSM-DIP-33145-A08|Caroline Chimeno|BIN Taxonomy Match (Jan 2022)|BOLD...  
 Zavrelimyia melanura|ZSM-DIP-33143-B07|Caroline Chimeno|BIN Taxonomy Match (Jan 2022)|BOLD...  
 Zavrelimyia nr. melanura|ZMUO.024892|Lauri Paasivirta||BOLD:AAD8015  
 Zavrelimyia nr. melanura|ZMUO.024786|Lauri Paasivirta||BOLD:AAD8015  
 Zavrelimyia nr. melanura|ZMUO.024787|Lauri Paasivirta||BOLD:AAD8015  
 Zavrelimyia melanura|ZSM-DIP-33130-H03|Caroline Chimeno|BIN Taxonomy Match (Jan 2022)|BOLD...  
 Zavrelimyia melanura|ZSM-DIP-33130-H02|Caroline Chimeno|BIN Taxonomy Match (Jan 2022)|BOLD...  
 Zavrelimyia melanura|ZSM-DIP-33145-D03|Caroline Chimeno|BIN Taxonomy Match (Jan 2022)|BOLD...  
 Zavrelimyia melanura|ZSM-DIP-33141-G02|Caroline Chimeno|BIN Taxonomy Match (Jan 2022)|BOLD...  
 Zavrelimyia melanura|ZSM-DIP-33135-G08|Caroline Chimeno|BIN Taxonomy Match (Jan 2022)|BOLD...  
 Zavrelimyia melanura|ZSM-DIP-33143-B08|Caroline Chimeno|BIN Taxonomy Match (Jan 2022)|BOLD...  
 Zavrelimyia melanura|SOE83|Elisabeth Sturj|BOLD:AAD8015  
 Zavrelimyia melanura|ATNA327|Elisabeth Sturj|BOLD:AAD8015  
 Zavrelimyia melanura|SOE269|Elisabeth Sturj|BOLD:AAD8015  
 Zavrelimyia|ZMUO.025935|Lauri Paasivirta||BOLD:AAD8015  
 Zavrelimyia|ZMUO.025934|Lauri Paasivirta||BOLD:AAD8015  
 Zavrelimyia melanura|SOE93|Elisabeth Sturj|BOLD:AAD8015  
 Zavrelimyia melanura|SOE245|Elisabeth Sturj|BOLD:AAD8015  
 Zavrelimyia melanura|ATNA74|Elisabeth Sturj|BOLD:AAD8015  
 Pentaneurella katterjokki|ES147|Elisabeth Sturj  
 Pentaneurella katterjokki|ZMUO.025857|Lauri Paasivirta||BOLD:AAC3939  
 Pentaneurella katterjokki|ATNA72|Elisabeth Sturj|BOLD:AAC3939  
 Pentaneurella katterjokki|ATNA335|Elisabeth Sturj|BOLD:AAC3939  
 Pentaneurella katterjokki|ES46|Elisabeth Sturj|BOLD:AAC3939  
 Pentaneurella katterjokki|ES82|Elisabeth Sturj|BOLD:AAC3939  
 Pentaneurella katterjokki|EBAI-Ch066|Elisabeth Sturj|morphology|BOLD:AAC3939  
 Pentaneurella katterjokki|ZMUO.025856|Lauri Paasivirta||BOLD:AAC3939  
 Pentaneurella katterjokki|ATNA122|Elisabeth Sturj|BOLD:AAC3939  
 Pentaneurella katterjokki|EBAI-Ch122|Elisabeth Sturj|morphology|BOLD:AAC3939  
 Pentaneurella katterjokki|ATNA338|Elisabeth Sturj|BOLD:AAC3939  
 Pentaneurella katterjokki|ATNA333|Elisabeth Sturj|BOLD:AAC3939  
 Pentaneurella katterjokki|ATNA331|Elisabeth Sturj|BOLD:AAC3939  
 Pentaneurella katterjokki|ATNA329|Elisabeth Sturj|BOLD:AAC3939  
 Pentaneurella katterjokki|ATNA328|Elisabeth Sturj|BOLD:AAC3939  
 Pentaneurella katterjokki|ATNA334|Elisabeth Sturj|BOLD:AAC3939  
 Pentaneurella katterjokki|ATNA71|Elisabeth Sturj|BOLD:AAC3939  
 Zavrelimyia cf. divisa|TRD-CH370|Elisabeth Sturj|morphology|BOLD:ACT8467  
 Zavrelimyia cf. divisa|TRD-CH184|Elisabeth Sturj|morphology|BOLD:ACT8467



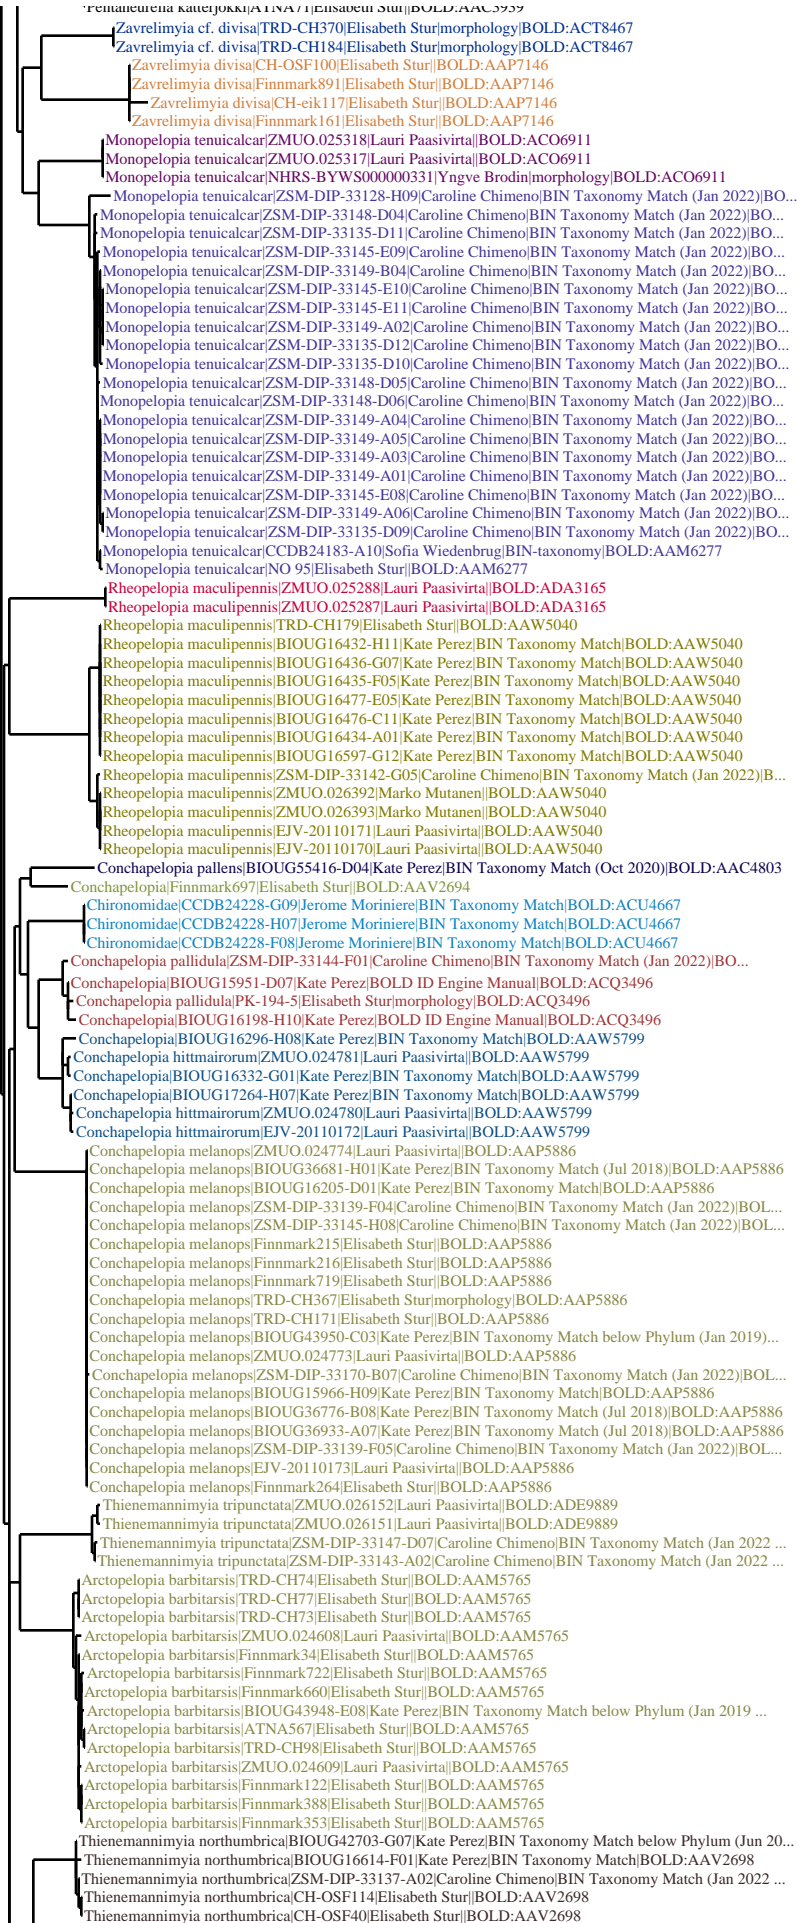

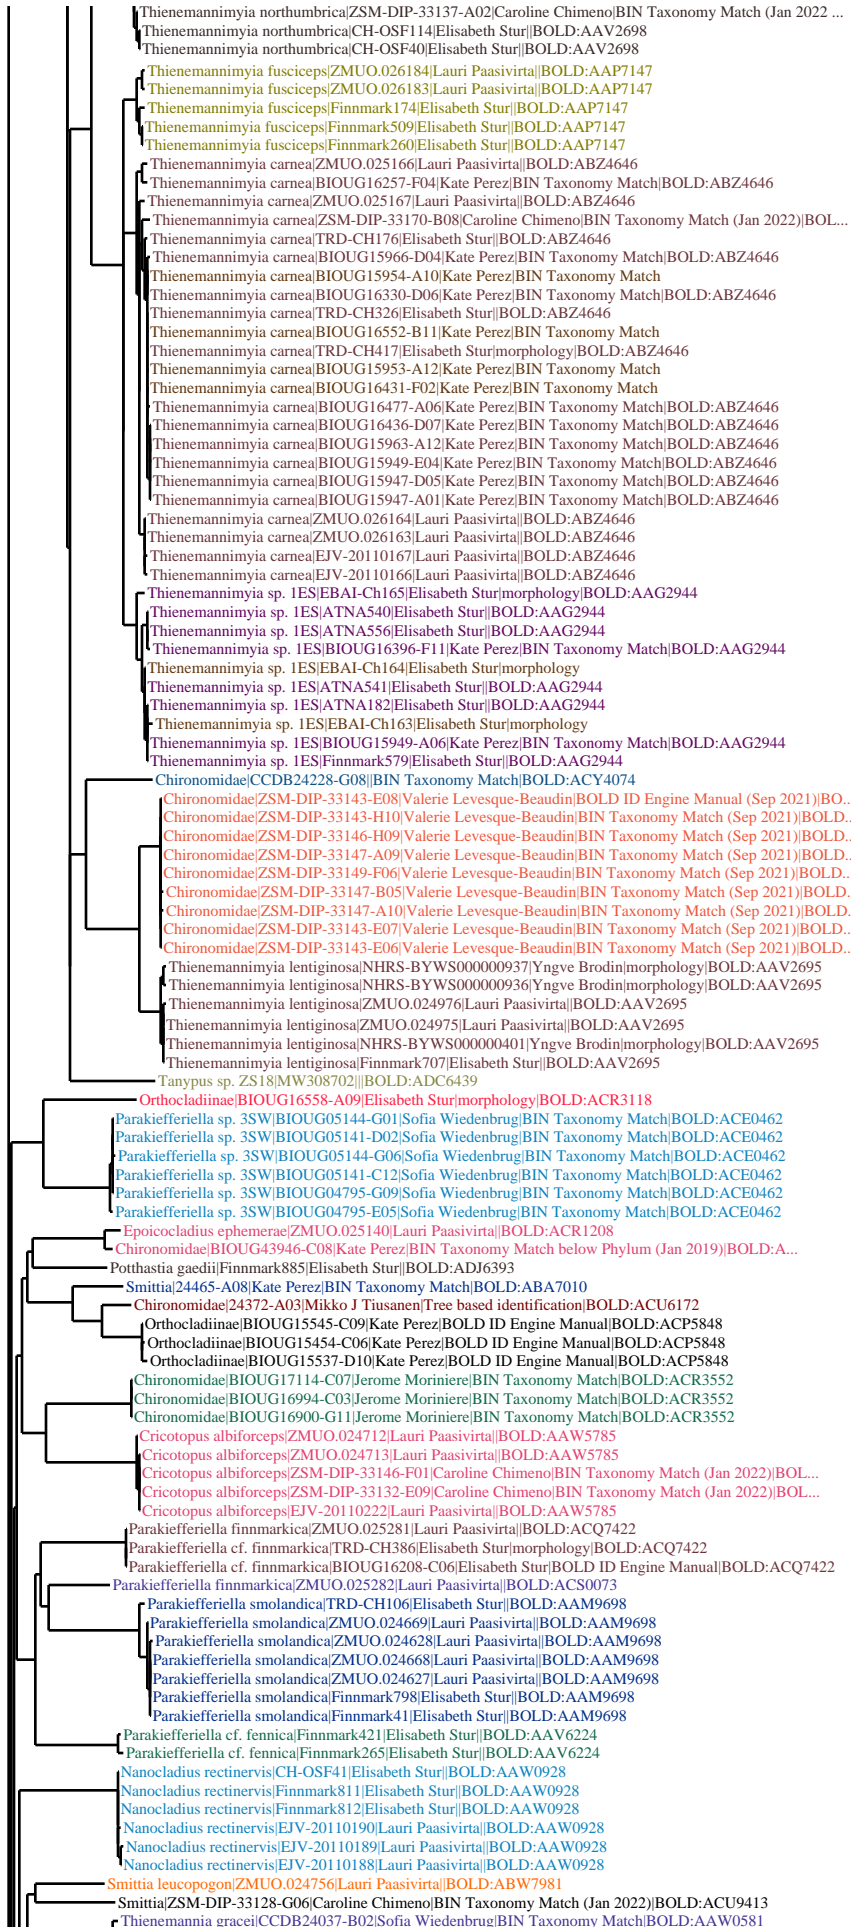

*Smittia leucopogon*[ZMUO.024756][Lauri Paasivirta][BOLD:ABW7981]  
*Smittia*[ZSM-DIP-33128-G06][Caroline Chimenò][BIN Taxonomy Match (Jan 2022)][BOLD:ACU9413]  
*Thienemannia gracei*[CCDB24037-B02][Sofia Wiedenbrug][BIN Taxonomy Match][BOLD:AAW0581]  
*Thienemannia gracei*[BIOUG16777-G01][Kate Perez][BIN Taxonomy Match][BOLD:AAW0581]  
*Thienemannia gracei*[ZSM-DIP-33133-D02][Caroline Chimenò][BIN Taxonomy Match (Jan 2022)][BOLD ...]  
*Thienemannia gracei*[ZSM-DIP-33142-F01][Caroline Chimenò][BIN Taxonomy Match (Jan 2022)][BOLD ...]  
*Thienemannia gracei*[BC-ZSM-DIP-22488-G09][Dieter Doczkal][BOLD:AAW0581]  
*Thienemannia gracei*[BC-ZSM-DIP-22488-F02][Dieter Doczkal][BOLD:AAW0581]  
*Thienemannia gracei*[BIOUG15456-A06][Kate Perez][BIN Taxonomy Match][BOLD:AAW0581]  
*Thienemannia gracei*[CH-OSF66][Elisabeth Stur][BOLD:AAW0581]  
*Thienemannia fulvofasciata*[ZSM34341-F08][Sofia Wiedenbrug][Morphology][BOLD:AAI0863]  
*Thienemannia fulvofasciata*[ZSM34342-D07][Sofia Wiedenbrug][Morphology][BOLD:AAI0863]  
*Thienemannia fulvofasciata*[CCDB24038-F02][Sofia Wiedenbrug][BIN Taxonomy Match][BOLD:AAI0863]  
*Thienemannia fulvofasciata*[ES109][Elisabeth Stur][BOLD:AAI0863]  
*Thienemannia fulvofasciata*[ES65][Elisabeth Stur][BOLD:AAI0863]  
*Smittia*[CCDB24039-H01][Sofia Wiedenbrug][BIN Taxonomy Match][BOLD:ACR0543]  
*Smittia cf. stercoraria*[TRD-CH418][Elisabeth Stur][morphology][BOLD:ACR0543]  
*Smittia cf. stercoraria*[BIOUG16712-H07][Elisabeth Stur][morphology][BOLD:ACR0543]  
*Chironomidae*[BIOUG16776-D12][Kate Perez][no morphological identification - introduction of interim ...]  
*Smittia*[ZSM-DIP-33133-F02][Caroline Chimenò][BIN Taxonomy Match (Jan 2022)][BOLD:ACR0048]  
*Chironomidae*[CCDB22605-D01][Sofia Wiedenbrug][no morphological identification - introduction of int...]  
*Chironomidae*[BIOUG16785-F03][Kate Perez][no morphological identification - introduction of interim ...]  
*Chironomidae*[BIOUG16778-F11][Kate Perez][no morphological identification - introduction of interim ...]  
*Smittia*[ZSM-DIP-33131-A05][Caroline Chimenò][BIN Taxonomy Match (Jan 2022)][BOLD:ACR0048]  
*Chironomidae*[BIOUG16740-F12][Kate Perez][no morphological identification - introduction of interim ...]  
*Chironomidae*[BIOUG16779-E01][Kate Perez][no morphological identification - introduction of interim ...]  
*Chironomidae*[BIOUG16739-F11][Kate Perez][no morphological identification - introduction of interim ...]  
*Chironomidae*[BIOUG16779-H02][Kate Perez][no morphological identification - introduction of interim ...]  
*Chironomidae*[BIOUG16854-A12][Kate Perez][no morphological identification - introduction of interim ...]  
*Chironomidae*[BIOUG16785-B08][Kate Perez][no morphological identification - introduction of interim ...]  
*Chironomidae*[BIOUG16739-B11][Kate Perez][no morphological identification - introduction of interim ...]  
*Chironomidae*[BIOUG16779-H08][Kate Perez][no morphological identification - introduction of interim ...]  
*Chironomidae*[BIOUG16779-C07][Kate Perez][no morphological identification - introduction of interim ...]  
*Chironomidae*[BIOUG16782-E11][Kate Perez][no morphological identification - introduction of interim ...]  
*Smittia*[ZSM-DIP-33146-G01][Caroline Chimenò][BIN Taxonomy Match (Jan 2022)][BOLD:ACR0048]  
*Chironomidae*[BIOUG16785-A09][Kate Perez][no morphological identification - introduction of interim ...]  
*Chironomidae*[BIOUG16738-G03][Kate Perez][no morphological identification - introduction of interim ...]  
*Chironomidae*[BIOUG16776-C04][Kate Perez][no morphological identification - introduction of interim ...]  
*Chironomidae*[BIOUG16778-D11][Kate Perez][no morphological identification - introduction of interim ...]  
*Chironomidae*[BIOUG16738-E02][Kate Perez][no morphological identification - introduction of interim ...]  
*Chironomidae*[BIOUG16784-A12][Kate Perez][no morphological identification - introduction of interim ...]  
*Chironomidae*[BIOUG16776-D11][Kate Perez][no morphological identification - introduction of interim ...]  
*Chironomidae*[BIOUG16892-C05][Kate Perez][no morphological identification - introduction of interim ...]  
*Chironomidae*[BIOUG16783-B11][Kate Perez][no morphological identification - introduction of interim ...]  
*Chironomidae*[CCDB22605-D03][Sofia Wiedenbrug][no morphological identification - introduction of int...]  
*Chironomidae*[BIOUG16778-C04][Kate Perez][no morphological identification - introduction of interim ...]  
*Chironomidae*[BIOUG16779-G10][Kate Perez][no morphological identification - introduction of interim ...]  
*Chironomidae*[BIOUG16783-F11][Kate Perez][no morphological identification - introduction of interim ...]  
*Chironomidae*[BIOUG16736-C06][Kate Perez][no morphological identification - introduction of interim ...]  
*Chironomidae*[BIOUG16854-F09][Kate Perez][no morphological identification - introduction of interim ...]  
*Chironomidae*[BIOUG16785-F02][Kate Perez][no morphological identification - introduction of interim ...]  
*Chironomidae*[BIOUG16782-H05][Kate Perez][no morphological identification - introduction of interim ...]  
*Chironomidae*[BIOUG16739-H06][Kate Perez][no morphological identification - introduction of interim ...]  
*Chironomidae*[BIOUG16739-G03][Kate Perez][no morphological identification - introduction of interim ...]  
*Smittia*[ZSM-DIP-33131-C06][Caroline Chimenò][BIN Taxonomy Match (Jan 2022)][BOLD:ACR0048]  
*Smittia*[BIOUG16857-D01][Kate Perez][BIN Taxonomy Match][BOLD:ACE0351]  
*Smittia*[BIOUG16893-B07][Kate Perez][BIN Taxonomy Match][BOLD:ACE0351]  
*Smittia*[BIOUG16857-H07][Kate Perez][BIN Taxonomy Match][BOLD:ACE0351]  
*Smittia*[BIOUG16893-F12][Kate Perez][BIN Taxonomy Match][BOLD:ACE0351]  
*Smittia*[BIOUG16784-G07][Kate Perez][BIN Taxonomy Match][BOLD:ACE0351]  
*Smittia cf. stercoraria*[ZSM-DIP-33128-C10][Caroline Chimenò][BIN Taxonomy Match (Jan 2022)][BO...]  
*Smittia cf. stercoraria*[ZSM-DIP-33128-C05][Caroline Chimenò][BIN Taxonomy Match (Jan 2022)][BO...]  
*Smittia cf. stercoraria*[ZSM-DIP-33141-B11][Caroline Chimenò][BIN Taxonomy Match (Jan 2022)][BO...]  
*Smittia*[BIOUG43079-H08][Kate Perez][BIN Taxonomy Match below Phylum (Jul 2019)][BOLD:ACE0351]  
*Smittia*[BIOUG16856-E08][Kate Perez][BIN Taxonomy Match][BOLD:ACE0351]  
*Smittia*[BIOUG16856-H10][Kate Perez][BIN Taxonomy Match][BOLD:ACE0351]  
*Smittia*[BIOUG16738-E12][Kate Perez][BIN Taxonomy Match][BOLD:ACE0351]  
*Smittia*[BIOUG55424-C03][Stefan Schmidt][BIN Taxonomy Match (Sep 2020)][BOLD:ACE0351]  
*Smittia*[CCDB22604-F05][Sofia Wiedenbrug][BOLD:ACE0351]  
*Smittia*[BIOUG16721-A08][Kate Perez][BIN Taxonomy Match][BOLD:ACE0351]  
*Smittia*[BIOUG16721-A05][Kate Perez][BIN Taxonomy Match][BOLD:ACE0351]  
*Smittia*[BIOUG16776-C07][Kate Perez][BIN Taxonomy Match][BOLD:ACE0351]  
*Smittia*[BIOUG16738-D09][Kate Perez][BIN Taxonomy Match][BOLD:ACE0351]  
*Smittia*[BIOUG16778-E01][Kate Perez][BIN Taxonomy Match][BOLD:ACE0351]  
*Smittia*[BIOUG16893-B04][Kate Perez][BIN Taxonomy Match][BOLD:ACE0351]  
*Smittia*[BIOUG16892-H03][Kate Perez][BIN Taxonomy Match][BOLD:ACE0351]  
*Smittia*[BIOUG16892-H05][Kate Perez][BIN Taxonomy Match][BOLD:ACE0351]  
*Smittia*[BIOUG16856-E12][Kate Perez][BIN Taxonomy Match][BOLD:ACE0351]  
*Smittia*[BIOUG16856-D06][Kate Perez][BIN Taxonomy Match][BOLD:ACE0351]  
*Smittia*[BIOUG16892-B03][Kate Perez][BIN Taxonomy Match][BOLD:ACE0351]  
*Smittia*[BIOUG16721-B01][Kate Perez][BIN Taxonomy Match][BOLD:ACE0351]  
*Smittia*[BIOUG16784-D10][Kate Perez][BIN Taxonomy Match][BOLD:ACE0351]  
*Smittia*[BIOUG16783-B12][Kate Perez][BIN Taxonomy Match][BOLD:ACE0351]  
*Smittia cf. stercoraria*[BIOUG17117-H05][Kate Perez][BIN Taxonomy Match][BOLD:ACE0351]  
*Smittia cf. stercoraria*[BIOUG16855-E01][Kate Perez][BIN Taxonomy Match][BOLD:ACE0351]  
*Smittia cf. stercoraria*[ZSM-DIP-33136-C04][Caroline Chimenò][BIN Taxonomy Match (Jan 2022)][BO...]  
*Smittia cf. stercoraria*[BIOUG16854-G07][Kate Perez][BIN Taxonomy Match][BOLD:ACE0351]  
*Smittia cf. stercoraria*[BIOUG16892-B09][Kate Perez][BIN Taxonomy Match][BOLD:ACE0351]  
*Smittia cf. stercoraria*[BIOUG16854-C05][Kate Perez][BIN Taxonomy Match][BOLD:ACE0351]  
*Smittia cf. stercoraria*[BIOUG16784-G09][Kate Perez][BIN Taxonomy Match][BOLD:ACE0351]  
*Smittia cf. stercoraria*[BIOUG16892-C12][Kate Perez][BIN Taxonomy Match][BOLD:ACE0351]  
*Smittia cf. stercoraria*[BIOUG16859-H09][Kate Perez][BIN Taxonomy Match][BOLD:ACE0351]  
*Smittia cf. stercoraria*[BIOUG16785-H05][Kate Perez][BIN Taxonomy Match][BOLD:ACE0351]  
*Smittia cf. stercoraria*[BIOUG16784-E12][Kate Perez][BIN Taxonomy Match][BOLD:ACE0351]  
*Smittia cf. stercoraria*[CCDB22604-F08][Sofia Wiedenbrug][BOLD:ACE0351]  
*Smittia*[BIOUG55423-F05][Stefan Schmidt][BIN Taxonomy Match (Sep 2020)][BOLD:ACE0351]  
*Smittia cf. stercoraria*[ZSM-DIP-33128-G09][Caroline Chimenò][BIN Taxonomy Match (Jan 2022)][BO...]  
*Smittia cf. stercoraria*[ZSM-DIP-33128-G05][Caroline Chimenò][BIN Taxonomy Match (Jan 2022)][BO...]  
*Smittia cf. stercoraria*[ZSM-DIP-33136-F04][Caroline Chimenò][BIN Taxonomy Match (Jan 2022)][BO...]  
*Smittia cf. stercoraria*[ZSM-DIP-33132-E07][Caroline Chimenò][BIN Taxonomy Match (Jan 2022)][BO...]  
*Smittia*[BIOUG55424-H10][Stefan Schmidt][BIN Taxonomy Match (Sep 2020)][BOLD:ACE0351]  
*Smittia cf. stercoraria*[ZSM-DIP-33135-F04][Caroline Chimenò][BIN Taxonomy Match (Jan 2022)][BO...]  
*Smittia cf. stercoraria*[ZSM-DIP-33131-F00][Caroline Chimenò][BIN Taxonomy Match (Jan 2022)][BO...

Smittia cf. stercoraria|ZSM-DIP-33135-F04|Caroline Chimeno|BIN Taxonomy Match (Jan 2022)|BO...  
 Smittia cf. stercoraria|ZSM-DIP-33131-D09|Caroline Chimeno|BIN Taxonomy Match (Jan 2022)|BO...  
 Smittia cf. stercoraria|ZSM-DIP-33139-B10|Caroline Chimeno|BIN Taxonomy Match (Jan 2022)|BO...  
 Smittia cf. stercoraria|ZSM-DIP-33141-B12|Caroline Chimeno|BIN Taxonomy Match (Jan 2022)|BO...  
 Smittia cf. stercoraria|ZSM-DIP-33130-C07|Caroline Chimeno|BIN Taxonomy Match (Jan 2022)|BO...  
 Smittia cf. stercoraria|ZSM-DIP-33135-F03|Caroline Chimeno|BIN Taxonomy Match (Jan 2022)|BO...  
 Smittia cf. stercoraria|ZSM-DIP-33135-F06|Caroline Chimeno|BIN Taxonomy Match (Jan 2022)|BO...  
 Smittia cf. stercoraria|ZSM-DIP-33141-A12|Caroline Chimeno|BIN Taxonomy Match (Jan 2022)|BO...  
 Smittia|BIOUG42959-B11|Kate Perez|BIN Taxonomy Match below Phylum (Jul 2019)|BOLD:ACE0351  
 Smittia|BIOUG55423-D05|Stefan Schmidt|BIN Taxonomy Match (Sep 2020)|BOLD:ACE0351  
 Smittia|BIOUG55425-A12|Stefan Schmidt|BIN Taxonomy Match (Sep 2020)|BOLD:ACE0351  
 Smittia|BIOUG55426-C08|Stefan Schmidt|BIN Taxonomy Match (Sep 2020)|BOLD:ACE0351  
 Smittia|BIOUG55428-D08|Stefan Schmidt|BIN Taxonomy Match (Sep 2020)|BOLD:ACE0351  
 Smittia|BIOUG55436-F11|Stefan Schmidt|BIN Taxonomy Match (Sep 2020)|BOLD:ACE0351  
 Smittia cf. stercoraria|ZSM-DIP-33132-H07|Caroline Chimeno|BIN Taxonomy Match (Jan 2022)|BO...  
 Smittia cf. stercoraria|ZSM-DIP-33133-D04|Caroline Chimeno|BIN Taxonomy Match (Jan 2022)|BO...  
 Smittia cf. stercoraria|ZSM-DIP-33133-D05|Caroline Chimeno|BIN Taxonomy Match (Jan 2022)|BO...  
 Smittia cf. stercoraria|ZSM-DIP-33133-D06|Caroline Chimeno|BIN Taxonomy Match (Jan 2022)|BO...  
 Smittia cf. stercoraria|ZSM-DIP-33137-C11|Caroline Chimeno|BIN Taxonomy Match (Jan 2022)|BO...  
 Smittia cf. stercoraria|ZSM-DIP-33144-C03|Caroline Chimeno|BIN Taxonomy Match (Jan 2022)|BO...  
 Smittia cf. stercoraria|ZSM-DIP-33141-B01|Caroline Chimeno|BIN Taxonomy Match (Jan 2022)|BO...  
 Smittia cf. stercoraria|ZSM-DIP-33141-B02|Caroline Chimeno|BIN Taxonomy Match (Jan 2022)|BO...  
 Smittia cf. stercoraria|ZSM-DIP-33143-D03|Caroline Chimeno|BIN Taxonomy Match (Jan 2022)|BO...  
 Smittia cf. stercoraria|ZSM-DIP-33135-F08|Caroline Chimeno|BIN Taxonomy Match (Jan 2022)|BO...  
 Smittia cf. stercoraria|ZSM-DIP-33136-C02|Caroline Chimeno|BIN Taxonomy Match (Jan 2022)|BO...  
 Smittia cf. stercoraria|ZSM-DIP-33136-C03|Caroline Chimeno|BIN Taxonomy Match (Jan 2022)|BO...  
 Smittia cf. stercoraria|ZSM-DIP-33136-F01|Caroline Chimeno|BIN Taxonomy Match (Jan 2022)|BO...  
 Smittia cf. stercoraria|ZSM-DIP-33136-H10|Caroline Chimeno|BIN Taxonomy Match (Jan 2022)|BO...  
 Smittia cf. stercoraria|ZSM-DIP-33139-B11|Caroline Chimeno|BIN Taxonomy Match (Jan 2022)|BO...  
 Smittia cf. stercoraria|ZSM-DIP-33140-D04|Caroline Chimeno|BIN Taxonomy Match (Jan 2022)|BO...  
 Smittia cf. stercoraria|ZSM-DIP-33141-A11|Caroline Chimeno|BIN Taxonomy Match (Jan 2022)|BO...  
 Smittia cf. stercoraria|ZSM-DIP-33172-H04|Caroline Chimeno|BIN Taxonomy Match (Jan 2022)|BO...  
 Smittia cf. stercoraria|ZSM-DIP-33128-C11|Caroline Chimeno|BIN Taxonomy Match (Jan 2022)|BO...  
 Smittia cf. stercoraria|ZSM-DIP-33146-C11|Caroline Chimeno|BIN Taxonomy Match (Jan 2022)|BO...  
 Smittia cf. stercoraria|ZSM-DIP-33146-D02|Caroline Chimeno|BIN Taxonomy Match (Jan 2022)|BO...  
 Smittia|BIOUG55428-B07|Stefan Schmidt|BIN Taxonomy Match (Sep 2020)|BOLD:ACE0351  
 Smittia cf. stercoraria|ZSM-DIP-33128-G04|Caroline Chimeno|BIN Taxonomy Match (Jan 2022)|BO...  
 Smittia|BIOUG55428-E05|Stefan Schmidt|BIN Taxonomy Match (Sep 2020)|BOLD:ACE0351  
 Smittia cf. stercoraria|CCDB22604-F10|Sofia Wiedenbrug|BOLD:ACE0351  
 Smittia cf. stercoraria|ZSM-DIP-33139-B09|Caroline Chimeno|BIN Taxonomy Match (Jan 2022)|BO...  
 Smittia cf. stercoraria|ZSM-DIP-33140-D07|Caroline Chimeno|BIN Taxonomy Match (Jan 2022)|BO...  
 Smittia cf. stercoraria|CCDB22604-F06|Sofia Wiedenbrug|BOLD:ACE0351  
 Smittia cf. stercoraria|ZSM-DIP-33141-A10|Caroline Chimeno|BIN Taxonomy Match (Jan 2022)|BO...  
 Smittia cf. stercoraria|ZSM-DIP-33136-C01|Caroline Chimeno|BIN Taxonomy Match (Jan 2022)|BO...  
 Smittia|BIOUG55423-F12|Stefan Schmidt|BIN Taxonomy Match (Sep 2020)|BOLD:ACE0351  
 Smittia cf. stercoraria|CCDB24183E03|Sofia Wiedenbrug|Morphology|BOLD:ACE0351  
 Smittia cf. stercoraria|BIOUG05105-B08|Kate Perez|BIN Taxonomy Match|BOLD:ACE0351  
 Smittia|BIOUG42967-B07|Kate Perez|BIN Taxonomy Match below Phylum (Jun 2019)|BOLD:AAH1020  
 Smittia sp. 23ES|BIOUG37052-F06|Kate Perez|BIN Taxonomy Match (Jan 2019)|BOLD:AAH9641  
 Smittia sp. 23ES|BIOUG37182-C04|Kate Perez|BIN Taxonomy Match (Jan 2019)|BOLD:AAH9641  
 Smittia aterrima|ZMUO.026167|Lauri Paasivirta|BOLD:AAH9641  
 Smittia sp. 23ES|BIOUG16777-E12|Kate Perez|BIN Taxonomy Match|BOLD:AAH9641  
 Smittia sp. 23ES|Finmark73|Elisabeth Stur|BOLD:AAH9641  
 Smittia|BIOUG36625-H06|Kate Perez|BIN Taxonomy Match (Jul 2018)|BOLD:AAAN5355  
 Smittia|BIOUG36625-G03|Kate Perez|BIN Taxonomy Match (Jul 2018)|BOLD:AAAN5355  
 Smittia|BIOUG36625-F09|Kate Perez|BIN Taxonomy Match (Jul 2018)|BOLD:AAAN5355  
 Smittia|BIOUG36625-G07|Kate Perez|BIN Taxonomy Match (Jul 2018)|BOLD:AAAN5355  
 Smittia|BIOUG36625-E07|Kate Perez|BIN Taxonomy Match (Jul 2018)|BOLD:AAAN5355  
 Smittia|BIOUG36624-G11|Kate Perez|BIN Taxonomy Match (Jul 2018)|BOLD:AAAN5355  
 Smittia|BIOUG36624-G10|Kate Perez|BIN Taxonomy Match (Jul 2018)|BOLD:AAAN5355  
 Smittia cf. stercoraria|BIOUG14592-G07|Elisabeth Stur|BIN Taxonomy Match|BOLD:AAAN5355  
 Chironomidae|CCDB22604-F09|Sofia Wiedenbrug|no morphological identification - introduction of int...  
 Smittia cf. stercoraria|ZSM-DIP-33139-B06|Caroline Chimeno|BIN Taxonomy Match (Jan 2022)|BO...  
 Smittia stercoraria|ZSM-DIP-33146-D10|Caroline Chimeno|BIN Taxonomy Match (Jan 2022)|BOLD ...  
 Smittia cf. stercoraria|ZSM-DIP-33139-B05|Caroline Chimeno|BIN Taxonomy Match (Jan 2022)|BO...  
 Smittia cf. stercoraria|ZSM-DIP-33139-B04|Caroline Chimeno|BIN Taxonomy Match (Jan 2022)|BO...  
 Smittia stercoraria|ZSM-DIP-33135-H03|Caroline Chimeno|BIN Taxonomy Match (Jan 2022)|BOLD ...  
 Smittia cf. stercoraria|ZSM-DIP-33134-F05|Caroline Chimeno|BIN Taxonomy Match (Jan 2022)|BO...  
 Smittia|BIOUG42933-E06|Kate Perez|BIN Taxonomy Match below Phylum (Jun 2019)|BOLD:AAAN5355  
 Smittia|BIOUG36625-B08|Kate Perez|BIN Taxonomy Match (Jul 2018)|BOLD:AAAN5355  
 Smittia|BIOUG36624-G08|Kate Perez|BIN Taxonomy Match (Jul 2018)|BOLD:AAAN5355  
 Smittia|ZSM-DIP-33133-E10|Caroline Chimeno|BIN Taxonomy Match (Jan 2022)|BOLD:AAAN5355  
 Smittia|ZSM-DIP-33133-D09|Caroline Chimeno|BIN Taxonomy Match (Jan 2022)|BOLD:AAAN5355  
 Smittia|ZSM-DIP-33140-C04|Caroline Chimeno|BIN Taxonomy Match (Jan 2022)|BOLD:AAAN5355  
 Smittia|BIOUG36625-C11|Kate Perez|BIN Taxonomy Match (Jul 2018)|BOLD:AAAN5355  
 Smittia|BIOUG36625-D09|Kate Perez|BIN Taxonomy Match (Jul 2018)|BOLD:AAAN5355  
 Smittia|BIOUG36625-G08|Kate Perez|BIN Taxonomy Match (Jul 2018)|BOLD:AAAN5355  
 Smittia|BIOUG36625-G12|Kate Perez|BIN Taxonomy Match (Jul 2018)|BOLD:AAAN5355  
 Smittia|BIOUG36625-E04|Kate Perez|BIN Taxonomy Match (Jul 2018)|BOLD:AAAN5355  
 Smittia cf. stercoraria|BIOUG15456-G03|Elisabeth Stur|BIN Taxonomy Match|BOLD:AAAN5355  
 Smittia cf. stercoraria|BIOUG15460-C04|Elisabeth Stur|BIN Taxonomy Match|BOLD:AAAN5355  
 Smittia stercoraria|ZMUO.025335|Lauri Paasivirta|BOLD:AAAN5355  
 Smittia|BIOUG36625-F06|Kate Perez|BIN Taxonomy Match (Jul 2018)|BOLD:AAAN5355  
 Chironomidae|BIOUG16892-A06|Kate Perez|no morphological identification - introduction of interim ...  
 Smittia|BIOUG36625-F02|Kate Perez|BIN Taxonomy Match (Jul 2018)|BOLD:AAAN5355  
 Smittia|BIOUG36624-G05|Kate Perez|BIN Taxonomy Match (Jul 2018)|BOLD:AAAN5355  
 Smittia cf. stercoraria|TRD-CH121|Elisabeth Stur|BOLD:AAAN5355  
 Smittia|BIOUG36625-F05|Kate Perez|BIN Taxonomy Match (Jul 2018)|BOLD:AAAN5358  
 Smittia cf. stercoraria|TRD-CH82|Elisabeth Stur|BOLD:AAAN5358  
 Smittia|BIOUG36627-E06|Kate Perez|BIN Taxonomy Match (Jul 2018)|BOLD:AAAN5358  
 Smittia|BIOUG36650-A06|Kate Perez|BIN Taxonomy Match (Jul 2018)|BOLD:AAAN5358  
 Smittia|BIOUG36625-D05|Kate Perez|BIN Taxonomy Match (Jul 2018)|BOLD:AAAN5358  
 Smittia|BIOUG36625-G04|Kate Perez|BIN Taxonomy Match (Jul 2018)|BOLD:AAAN5358  
 Smittia|BIOUG36625-C08|Kate Perez|BIN Taxonomy Match (Jul 2018)|BOLD:AAAN5358  
 Smittia|BIOUG36625-C10|Kate Perez|BIN Taxonomy Match (Jul 2018)|BOLD:AAAN5358  
 Smittia|BIOUG36625-D11|Kate Perez|BIN Taxonomy Match (Jul 2018)|BOLD:AAAN5358  
 Smittia|BIOUG36625-H04|Kate Perez|BIN Taxonomy Match (Jul 2018)|BOLD:AAAN5358  
 Smittia|BIOUG36625-C01|Kate Perez|BIN Taxonomy Match (Jul 2018)|BOLD:AAAN5358  
 Smittia|BIOUG36625-H05|Kate Perez|BIN Taxonomy Match (Jul 2018)|BOLD:AAAN5358  
 Smittia|BIOUG36778-B01|Kate Perez|BIN Taxonomy Match (Jul 2018)|BOLD:AAAN5358  
 Smittia|BIOUG36624-H02|Kate Perez|BIN Taxonomy Match (Jul 2018)|BOLD:AAAN5358

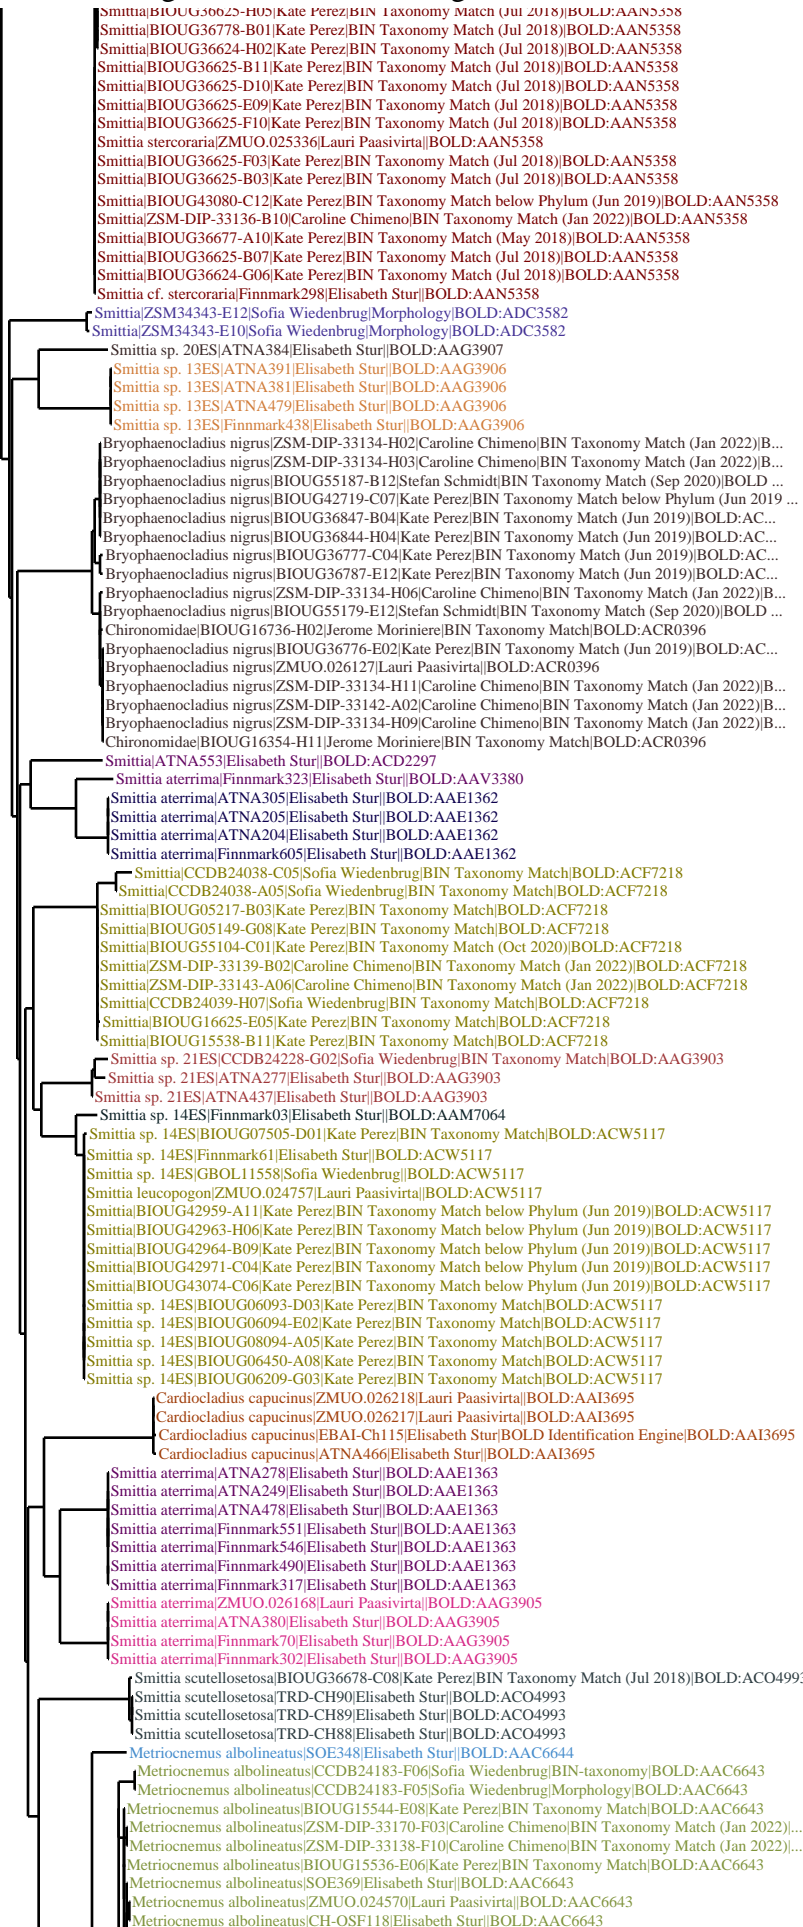

Metriocnemus albolineatus|SOE369|Elisabeth Sturj|BOLD: AAC6643  
 Metriocnemus albolineatus|ZMUO.024570|Lauri Paasivirta|BOLD: AAC6643  
 Metriocnemus albolineatus|CH-OSF118|Elisabeth Sturj|BOLD: AAC6643  
 Metriocnemus albolineatus|SOE374|Elisabeth Sturj|BOLD: AAC6643  
 Metriocnemus albolineatus|SOE466|Elisabeth Sturj|BOLD: AAC6643  
 Metriocnemus albolineatus|SOE52|Elisabeth Sturj|BOLD: AAC6643  
 Metriocnemus albolineatus|SOE365|Elisabeth Sturj|BOLD: AAC6643  
 Metriocnemus albolineatus|CH-eik11|Elisabeth Sturj|BOLD: AAC6643  
 Metriocnemus albolineatus|CH-eik15|Elisabeth Sturj|BOLD: AAC6643  
 Metriocnemus albolineatus|GBOL11502|Sofia Wiedenbrug|Morphology|BOLD: AAC6643  
 Metriocnemus albolineatus|ZSM-DIP-33143-D07|Caroline Chimen|BIN Taxonomy Match (Jan 2022)|...  
 Metriocnemus albolineatus|ZSM-DIP-33134-F06|Caroline Chimen|BIN Taxonomy Match (Jan 2022)|...  
 Metriocnemus albolineatus|ZSM-DIP-33146-F08|Caroline Chimen|BIN Taxonomy Match (Jan 2022)|...  
 Metriocnemus albolineatus|ZSM-DIP-33170-G11|Caroline Chimen|BIN Taxonomy Match (Jan 2022)|...  
 Metriocnemus albolineatus|ZSM-DIP-33137-D01|Caroline Chimen|BIN Taxonomy Match (Jan 2022)|...  
 Metriocnemus albolineatus|ZSM34343-C08|Sofia Wiedenbrug|Morphology|BOLD: AAC6643  
 Metriocnemus albolineatus|BIOUG16430-D02|Kate Perez|BIN Taxonomy Match|BOLD: AAC6643  
 Metriocnemus albolineatus|CH-eik81|Elisabeth Sturj|BOLD: AAC6643  
 Metriocnemus albolineatus|CH-eik60|Elisabeth Sturj|BOLD: AAC6643  
 Metriocnemus albolineatus|CH-eik57|Elisabeth Sturj|BOLD: AAC6643  
 Metriocnemus albolineatus|CH-eik82|Elisabeth Sturj|BOLD: AAC6643  
 Metriocnemus albolineatus|CH-eik59|Elisabeth Sturj|BOLD: AAC6643  
 Metriocnemus albolineatus|GBOL11504|Sofia Wiedenbrug|Morphology|BOLD: AAC6643  
 Metriocnemus albolineatus|CCDB21605-G04|Sofia Wiedenbrug|BOLD: AAC6643  
 Metriocnemus albolineatus|ZSM-DIP-33170-F01|Caroline Chimen|BIN Taxonomy Match (Jan 2022)|...  
 Metriocnemus albolineatus|CCDB21605-B12|Sofia Wiedenbrug|BOLD: AAC6643  
 Metriocnemus albolineatus|ZSM-DIP-33149-H08|Caroline Chimen|BIN Taxonomy Match (Jan 2022)|...  
 Metriocnemus albolineatus|BIOUG05143-D11|Kate Perez|BIN Taxonomy Match|BOLD: AAC6643  
 Metriocnemus albolineatus|BIOUG05105-H07|Kate Perez|BIN Taxonomy Match|BOLD: AAC6643  
 Metriocnemus albolineatus|SOE353|Elisabeth Sturj|BOLD: AAC6643  
 Metriocnemus albolineatus|SOE346|Elisabeth Sturj|BOLD: AAC6643  
 Metriocnemus albolineatus|SOE376|Elisabeth Sturj|BOLD: AAC6643  
 Metriocnemus albolineatus|SOE344|Elisabeth Sturj|BOLD: AAC6643  
 Metriocnemus albolineatus|BIOUG42721-D08|Kate Perez|BIN Taxonomy Match below Phylum (Jun 2019...  
 Metriocnemus albolineatus|BIOUG43081-H02|Kate Perez|BIN Taxonomy Match below Phylum (Jun 2019...  
 Metriocnemus albolineatus|ZMUO.024571|Lauri Paasivirta|BOLD: AAC6643  
 Metriocnemus albolineatus|Finmark301|Elisabeth Sturj|BOLD: AAC6643  
 Metriocnemus albolineatus|Finmark97|Elisabeth Sturj|BOLD: AAC6643  
 Metriocnemus albolineatus|TRD-CH43|Elisabeth Sturj|BOLD: AAC6643  
 Metriocnemus albolineatus|TRD-CH59|Elisabeth Sturj|BOLD: AAC6643  
 Metriocnemus albolineatus|TRD-CH412|Elisabeth Sturj|morphology|BOLD: AAC6643  
 Metriocnemus albolineatus|BIOUG16632-C02|Kate Perez|BIN Taxonomy Match|BOLD: AAC6643  
 Metriocnemus albolineatus|BIOUG15458-D10|Kate Perez|BIN Taxonomy Match|BOLD: AAC6643  
 Metriocnemus albolineatus|BIOUG15457-D04|Kate Perez|BIN Taxonomy Match|BOLD: AAC6643  
 Metriocnemus albolineatus|TRD-CH237|Elisabeth Sturj|BOLD: AAC6643  
 Metriocnemus albolineatus|BIOUG15545-B08|Kate Perez|BIN Taxonomy Match|BOLD: AAC6643  
 Metriocnemus albolineatus|BIOUG15454-D12|Kate Perez|BIN Taxonomy Match|BOLD: AAC6643  
 Metriocnemus albolineatus|BIOUG15797-D10|Kate Perez|BIN Taxonomy Match|BOLD: AAC6643  
 Metriocnemus albolineatus|BIOUG15719-A10|Kate Perez|BIN Taxonomy Match|BOLD: AAC6643  
 Metriocnemus albolineatus|BIOUG15459-A06|Kate Perez|BIN Taxonomy Match|BOLD: AAC6643  
 Metriocnemus albolineatus|BIOUG15460-E12|Kate Perez|BIN Taxonomy Match|BOLD: AAC6643  
 Metriocnemus albolineatus|BIOUG15201-G05|Kate Perez|BIN Taxonomy Match|BOLD: AAC6643  
 Metriocnemus albolineatus|BIOUG15455-A09|Kate Perez|BIN Taxonomy Match|BOLD: AAC6643  
 Metriocnemus albolineatus|BIOUG17064-E07|Kate Perez|BIN Taxonomy Match|BOLD: AAC6643  
 Metriocnemus albolineatus|BIOUG17065-D08|Kate Perez|BIN Taxonomy Match|BOLD: AAC6643  
 Metriocnemus albolineatus|BIOUG17065-D10|Kate Perez|BIN Taxonomy Match|BOLD: AAC6643  
 Metriocnemus albolineatus|BIOUG15184-H06|Kate Perez|BIN Taxonomy Match|BOLD: AAC6643  
 Metriocnemus albolineatus|BIOUG15458-B02|Kate Perez|BIN Taxonomy Match|BOLD: AAC6643  
 Metriocnemus albolineatus|BIOUG16434-A08|Kate Perez|BIN Taxonomy Match|BOLD: AAC6643  
 Metriocnemus albolineatus|BIOUG15456-H03|Kate Perez|BIN Taxonomy Match|BOLD: AAC6643  
 Metriocnemus albolineatus|BIOUG15675-F11|Kate Perez|BIN Taxonomy Match|BOLD: AAC6643  
 Metriocnemus albolineatus|BIOUG15460-H10|Kate Perez|BIN Taxonomy Match|BOLD: AAC6643  
 Metriocnemus albolineatus|BIOUG15455-F01|Kate Perez|BIN Taxonomy Match|BOLD: AAC6643  
 Metriocnemus albolineatus|BIOUG16625-H09|Kate Perez|BIN Taxonomy Match|BOLD: AAC6643  
 Metriocnemus albolineatus|BIOUG15454-F03|Kate Perez|BIN Taxonomy Match|BOLD: AAC6643  
 Metriocnemus albolineatus|BIOUG16480-F08|Kate Perez|BIN Taxonomy Match|BOLD: AAC6643  
 Metriocnemus albolineatus|BIOUG15542-C11|Kate Perez|BIN Taxonomy Match|BOLD: AAC6643  
 Metriocnemus albolineatus|BIOUG15950-D04|Kate Perez|BIN Taxonomy Match|BOLD: AAC6643  
 Metriocnemus albolineatus|BIOUG15718-A02|Kate Perez|BIN Taxonomy Match|BOLD: AAC6643  
 Metriocnemus albolineatus|NHRS-BYWS00000572|Yngve Brodin|morphology|BOLD: AAC6643  
 Metriocnemus albolineatus|Finmark295|Elisabeth Sturj|BOLD: AAC6643  
 Bryophaenocladus subparallelus|TRD-CH400|Elisabeth Sturj|morphology|BOLD: ACU4987  
 Bryophaenocladus subparallelus|ZSM-DIP-33149-G04|Caroline Chimen|BIN Taxonomy Match (Jan 202...  
 Bryophaenocladus subparallelus|ZSM-DIP-33141-F04|Caroline Chimen|BIN Taxonomy Match (Jan 202...  
 Bryophaenocladus subparallelus|ZSM-DIP-33134-D04|Caroline Chimen|BIN Taxonomy Match (Jan 202...  
 Bryophaenocladus subparallelus|ZSM-DIP-33132-C06|Caroline Chimen|BIN Taxonomy Match (Jan 202...  
 Paraphaenocladus|CCDB24228-F05|Sofia Wiedenbrug|BIN Taxonomy Match|BOLD: ACU4987  
 Bryophaenocladus subparallelus|ZSM-DIP-33143-G08|Caroline Chimen|BIN Taxonomy Match (Jan 202...  
 Bryophaenocladus subparallelus|NHRS-BYWS00000426|Yngve Brodin|morphology|BOLD: ACU4987  
 Bryophaenocladus subparallelus|NHRS-BYWS000001102|Yngve Brodin|morphology|BOLD: ACU4987  
 Bryophaenocladus subparallelus|NHRS-BYWS000001103|Yngve Brodin|morphology|BOLD: ACU4987  
 Bryophaenocladus subparallelus|NHRS-BYWS00000425|Yngve Brodin|morphology|BOLD: ACU4987  
 Smittia|CH-OSF80|Elisabeth Sturj|BOLD: ABA7011  
 Tvetenia bavarica|Finmark776|G. A. Halvorsen|BOLD: AAD2063  
 Tvetenia bavarica|EBA1-Ch108|Elisabeth Sturj|BOLD Identification Engine|BOLD: AAD2063  
 Tvetenia bavarica|ZMUO.026114|Lauri Paasivirta|BOLD: AAD2063  
 Tvetenia bavarica|EBA1-Ch107|Elisabeth Sturj|BOLD Identification Engine|BOLD: AAD2063  
 Tvetenia bavarica|ATNA5|Elisabeth Sturj|BOLD: AAD2063  
 Tvetenia bavarica|SOE241|Elisabeth Sturj|BOLD: AAD2063  
 Tvetenia bavarica|EBA1-Ch143|Elisabeth Sturj|BOLD Identification Engine|BOLD: AAD2063  
 Tvetenia bavarica|EBA1-Ch207|Elisabeth Sturj|morphology|BOLD: AAD2063  
 Tvetenia bavarica|BIOUG17023-A07|Kate Perez|BIN Taxonomy Match|BOLD: AAD2063  
 Tvetenia bavarica|BIOUG17023-E11|Kate Perez|BIN Taxonomy Match|BOLD: AAD2063  
 Tvetenia bavarica|CH-OSF61|Elisabeth Sturj|BOLD: AAD2063  
 Tvetenia bavarica|ATNA488|Elisabeth Sturj|BOLD: AAD2063  
 Tvetenia bavarica|ATNA207|Elisabeth Sturj|BOLD: AAD2063  
 Tvetenia bavarica|ATNA281|Elisabeth Sturj|BOLD: AAD2063  
 Tvetenia bavarica|EBA1-Ch144|Elisabeth Sturj|BOLD Identification Engine|BOLD: AAD2063  
 Tvetenia bavarica|EBA1-Ch105|Elisabeth Sturj|BOLD Identification Engine|BOLD: AAD2063  
 Tvetenia bavarica|EBA1-Ch138|Elisabeth Sturj|BOLD Identification Engine|BOLD: AAD2063  
 Tvetenia bavarica|EBA1-Ch103|Elisabeth Sturj|morphology|BOLD: AAD2063  
 Tvetenia bavarica|ATNA353|Elisabeth Sturj|BOLD: AAD2063  
 Tvetenia bavarica|FRAL-Ch708|Elisabeth Sturj|morphology

Tvetenia bavarica|EBAI-Ch103|Elisabeth Sturj|morphology|BOLD:AAD2063  
 Tvetenia bavarica|ATNA353|Elisabeth Sturj|BOLD:AAD2063  
 Tvetenia bavarica|EBAI-Ch208|Elisabeth Sturj|morphology  
 Tvetenia bavarica|ATNA487|Elisabeth Sturj|BOLD:AAD2063  
 Tvetenia bavarica|ZSM34343-A05|Sofia Wiedenbrug|Morphology|BOLD:AAD2063  
 Tvetenia bavarica|CCDB24039-G09|Sofia Wiedenbrug|BIN Taxonomy Match|BOLD:AAD2063  
 Tvetenia|ZSM34342-E02|Sofia Wiedenbrug|Morphology|BOLD:AAD2063  
 Tvetenia bavarica|CCDB24037-A05|Sofia Wiedenbrug|BIN Taxonomy Match|BOLD:AAD2063  
 Tvetenia bavarica|CCDB24037-H02|Sofia Wiedenbrug|BIN Taxonomy Match|BOLD:AAD2063  
 Tvetenia bavarica|BC-ZSM-DIP-22491-H01|Dieter Doczkal|BOLD:AAD2063  
 Tvetenia bavarica|CCDB24037-F07|Sofia Wiedenbrug|BIN Taxonomy Match|BOLD:AAD2063  
 Tvetenia bavarica|CCDB24229-A03|Sofia Wiedenbrug|BIN Taxonomy Match|BOLD:AAD2063  
 Tvetenia bavarica|CCDB24039-A02|Sofia Wiedenbrug|BIN Taxonomy Match|BOLD:AAD2063  
 Tvetenia bavarica|CCDB24037-E11|Sofia Wiedenbrug|BIN Taxonomy Match|BOLD:AAD2063  
 Tvetenia bavarica|CCDB24039-H03|Sofia Wiedenbrug|BIN Taxonomy Match|BOLD:AAD2063  
 Tvetenia bavarica|CCDB24039-G12|Sofia Wiedenbrug|BIN Taxonomy Match|BOLD:AAD2063  
 Tvetenia bavarica|CCDB24037-E01|Sofia Wiedenbrug|BIN Taxonomy Match|BOLD:AAD2063  
 Tvetenia bavarica|CCDB24037-E03|Sofia Wiedenbrug|BOLD:AAD2063  
 Tvetenia bavarica|CCDB24037-E10|Sofia Wiedenbrug|BIN Taxonomy Match|BOLD:AAD2063  
 Tvetenia bavarica|CCDB24037-E08|Sofia Wiedenbrug|BIN Taxonomy Match|BOLD:AAD2063  
 Tvetenia bavarica|CCDB24229-F12|Sofia Wiedenbrug|BIN Taxonomy Match|BOLD:AAD2063  
 Tvetenia bavarica|CCDB24037-B04|Sofia Wiedenbrug|BIN Taxonomy Match|BOLD:AAD2063  
 Tvetenia bavarica|BC-ZSM-DIP-22491-G09|Dieter Doczkal|BOLD:AAD2063  
 Tvetenia|ZSM34343-B09|Sofia Wiedenbrug|Morphology|BOLD:AAD2063  
 Tvetenia bavarica|CCDB24039-A04|Sofia Wiedenbrug|BIN Taxonomy Match|BOLD:AAD2063  
 Tvetenia bavarica|CCDB24038-H04|Sofia Wiedenbrug|BIN Taxonomy Match|BOLD:AAD2063  
 Tvetenia bavarica|CCDB24039-G11|Sofia Wiedenbrug|BIN Taxonomy Match|BOLD:AAD2063  
 Tvetenia bavarica|ZSM34343-H04|Sofia Wiedenbrug|Morphology|BOLD:AAD2063  
 Tvetenia bavarica|CCDB24037-B05|Sofia Wiedenbrug|BIN Taxonomy Match|BOLD:AAD2063  
 Tvetenia bavarica|CCDB24037-B03|Sofia Wiedenbrug|BIN Taxonomy Match|BOLD:AAD2063  
 Tvetenia bavarica|BC-ZSM-DIP-22551-E02|Dieter Doczkal|BOLD:AAD2063  
 Tvetenia bavarica|BC-ZSM-DIP-22491-D06|Dieter Doczkal|BOLD:AAD2063  
 Tvetenia bavarica|ES39|Elisabeth Sturj|BOLD:AAD2063  
 Tvetenia bavarica|CCDB24039-H11|Sofia Wiedenbrug|BIN Taxonomy Match|BOLD:AAD2063  
 Tvetenia bavarica|CCDB21606-F06|Sofia Wiedenbrug|BOLD:AAD2063  
 Tvetenia bavarica|CCDB24039-C07|Sofia Wiedenbrug|BIN Taxonomy Match|BOLD:AAD2063  
 Tvetenia bavarica|BC-ZSM-DIP-22551-E08|Dieter Doczkal|BOLD:AAD2063  
 Tvetenia bavarica|CCDB24038-C11|Sofia Wiedenbrug|BIN Taxonomy Match|BOLD:AAD2063  
 Tvetenia bavarica|CCDB24038-C10|Sofia Wiedenbrug|BIN Taxonomy Match|BOLD:AAD2063  
 Tvetenia bavarica|CCDB24037-H03|Sofia Wiedenbrug|BIN Taxonomy Match|BOLD:AAD2063  
 Tvetenia bavarica|CCDB24037-E09|Sofia Wiedenbrug|BIN Taxonomy Match|BOLD:AAD2063  
 Tvetenia bavarica|CCDB24039-D07|Sofia Wiedenbrug|BIN Taxonomy Match|BOLD:AAD2063  
 Tvetenia bavarica|ES175|Elisabeth Sturj|BOLD:AAD2063  
 Tvetenia bavarica|ES16|Elisabeth Sturj|BOLD:AAD2063  
 Tvetenia bavarica|ZMUO.024836|Lauri Paasivirta|BOLD:AAD2063  
 Tvetenia bavarica|ZMUO.024835|Lauri Paasivirta|BOLD:AAD2063  
 Tvetenia bavarica|Finmark788|Elisabeth Sturj|BOLD:AAD2063  
 Tvetenia bavarica|ZMUO.025853|Lauri Paasivirta|BOLD:AAD2063  
 Tvetenia bavarica|ZMUO.025852|Lauri Paasivirta|BOLD:AAD2063  
 Tvetenia bavarica|Finmark548|Elisabeth Sturj|BOLD:AAD2063  
 Orthocladius sp. 9TE|ATNA315|Torbjorn Ekrem|BOLD:AAD4029  
 Orthocladius sp. 9TE|Finmark355|Torbjorn Ekrem|BOLD:AAD4029  
 Orthocladius sp. 9TE|ATNA442|Torbjorn Ekrem|BOLD:AAD4029  
 Orthocladius sp. 9TE|ATNA313|Elisabeth Sturj|BOLD:AAD4029  
 Orthocladius sp. 9TE|ATNA229|Elisabeth Sturj|BOLD:AAD4029  
 Orthocladius sp. 9TE|ATNA441|Torbjorn Ekrem|BOLD:AAD4029  
 Orthocladius sp. 9TE|ATNA438|Torbjorn Ekrem|BOLD:AAD4029  
 Orthocladius sp. 9TE|ATNA443|Torbjorn Ekrem|BOLD:AAD4029  
 Orthocladius sp. 9TE|Finmark642|Torbjorn Ekrem|BOLD:AAD4029  
 Orthocladius gelidorum|ATNA424|Torbjorn Ekrem|BOLD:AAI3489  
 Orthocladius gelidorum|ATNA434|Elisabeth Sturj|BOLD:AAI3489  
 Orthocladius gelidorum|ES389|Elisabeth Sturj|BOLD:AAI3489  
 Orthocladius gelidorum|ATNA418|Torbjorn Ekrem|BOLD:AAI3489  
 Orthocladius gelidorum|ATNA473|Elisabeth Sturj|BOLD:AAI3489  
 Orthocladius gelidorum|ATNA433|Elisabeth Sturj|BOLD:AAI3489  
 Orthocladius gelidorum|ATNA419|Torbjorn Ekrem|BOLD:AAI3489  
 Orthocladius gelidorum|Finmark608|Torbjorn Ekrem|BOLD:AAI3489  
 Orthocladius sp. 6TE|ATNA439|Torbjorn Ekrem|BOLD:AAI3490  
 Orthocladius olivaceus|ATNA314|Torbjorn Ekrem|BOLD:AAI3491  
 Orthocladius olivaceus|ATNA444|Torbjorn Ekrem|BOLD:AAI3491  
 Orthocladius olivaceus|ATNA440|Torbjorn Ekrem|BOLD:AAI3491  
 Orthocladius sp. 8TE|ATNA300|Torbjorn Ekrem|BOLD:AAI3488  
 Orthocladius sp. 8TE|ATNA299|Torbjorn Ekrem|BOLD:AAI3488  
 Orthocladius sp. 7TE|Finmark406|Torbjorn Ekrem|BOLD:AAV5076  
 Orthocladius gelidorum|ZMUO.026015|Lauri Paasivirta|BOLD:ADF2399  
 Orthocladius gelidorum|ZMUO.029781|Marko Mutanen|BOLD:ADF2399  
 Orthocladius|ZMUO.025842|Lauri Paasivirta|BOLD:ADF2399  
 Orthocladius|ZMUO.025911|Lauri Paasivirta|BOLD:ADF2399  
 Orthocladius|ZMUO.025910|Lauri Paasivirta|BOLD:ADF2399  
 Orthocladius cf. sp. 2TE|BIOUG16713-C08|Elisabeth Sturj|BIN Taxonomy Match|BOLD:ACE0526  
 Orthocladius cf. sp. 2TE|BIOUG15963-F10|Elisabeth Sturj|BIN Taxonomy Match|BOLD:ACE0526  
 Orthocladius cf. sp. 2TE|BIOUG17064-C07|Elisabeth Sturj|BIN Taxonomy Match|BOLD:ACE0526  
 Orthocladius cf. sp. 2TE|TRD-CH331|Elisabeth Sturj|morphology|BOLD:ACE0526  
 Orthocladius olivaceus|NHRS-BYWS000001100|Yngve Brodin|morphology|BOLD:ACE0526  
 Orthocladius olivaceus|NHRS-BYWS000001099|Yngve Brodin|morphology|BOLD:ACE0526  
 Orthocladius olivaceus|NHRS-BYWS000001166|Yngve Brodin|morphology|BOLD:ACE0526  
 Orthocladius cf. sp. 2TE|TRD-CH164|Elisabeth Sturj|morphology|BOLD:ACE0526  
 Orthocladius cf. sp. 2TE|BIOUG15953-H01|Elisabeth Sturj|BIN Taxonomy Match|BOLD:ACE0526  
 Orthocladius cf. sp. 2TE|TRD-CH142|Elisabeth Sturj|morphology|BOLD:ACE0526  
 Orthocladius|BIOUG04795-G11|Kate Perez|BIN Taxonomy Match|BOLD:ACE0526  
 Orthocladius olivaceus|ZMUO.026178|Lauri Paasivirta|BOLD:AER2991  
 Orthocladius sp. 2TE|Finmark634|Torbjorn Ekrem|BOLD:AER2991  
 Orthocladius priomixtus|ZMUO.026293|Lauri Paasivirta|BOLD:AAD4028  
 Orthocladius subletteorum|CCDB24183-F10|Sofia Wiedenbrug|Morphology|BOLD:AAD4028  
 Orthocladius subletteorum|ATNA377|Torbjorn Ekrem|BOLD:AAD4028  
 Orthocladius priomixtus|ZMUO.026294|Lauri Paasivirta|BOLD:AAD4028  
 Orthocladius subletteorum|SOE38|Torbjorn Ekrem|BOLD:AAD4028  
 Orthocladius subletteorum|SOE37|Torbjorn Ekrem|BOLD:AAD4028  
 Orthocladius subletteorum|Finmark596|Torbjorn Ekrem|BOLD:AAD4028  
 Chironomidae|CCDB24228-F03|BIN Taxonomy Match  
 Orthocladius|BC-ZSM-DIP-22551-E04|Dieter Doczkal|BOLD:ACX2763  
 Orthocladius|BC-ZSM-DIP-22551-D07|Dieter Doczkal|BOLD:ACX2369  
 Orthocladius|BC-ZSM-DIP-22551-D06|Dieter Doczkal|BOLD:ACX2369

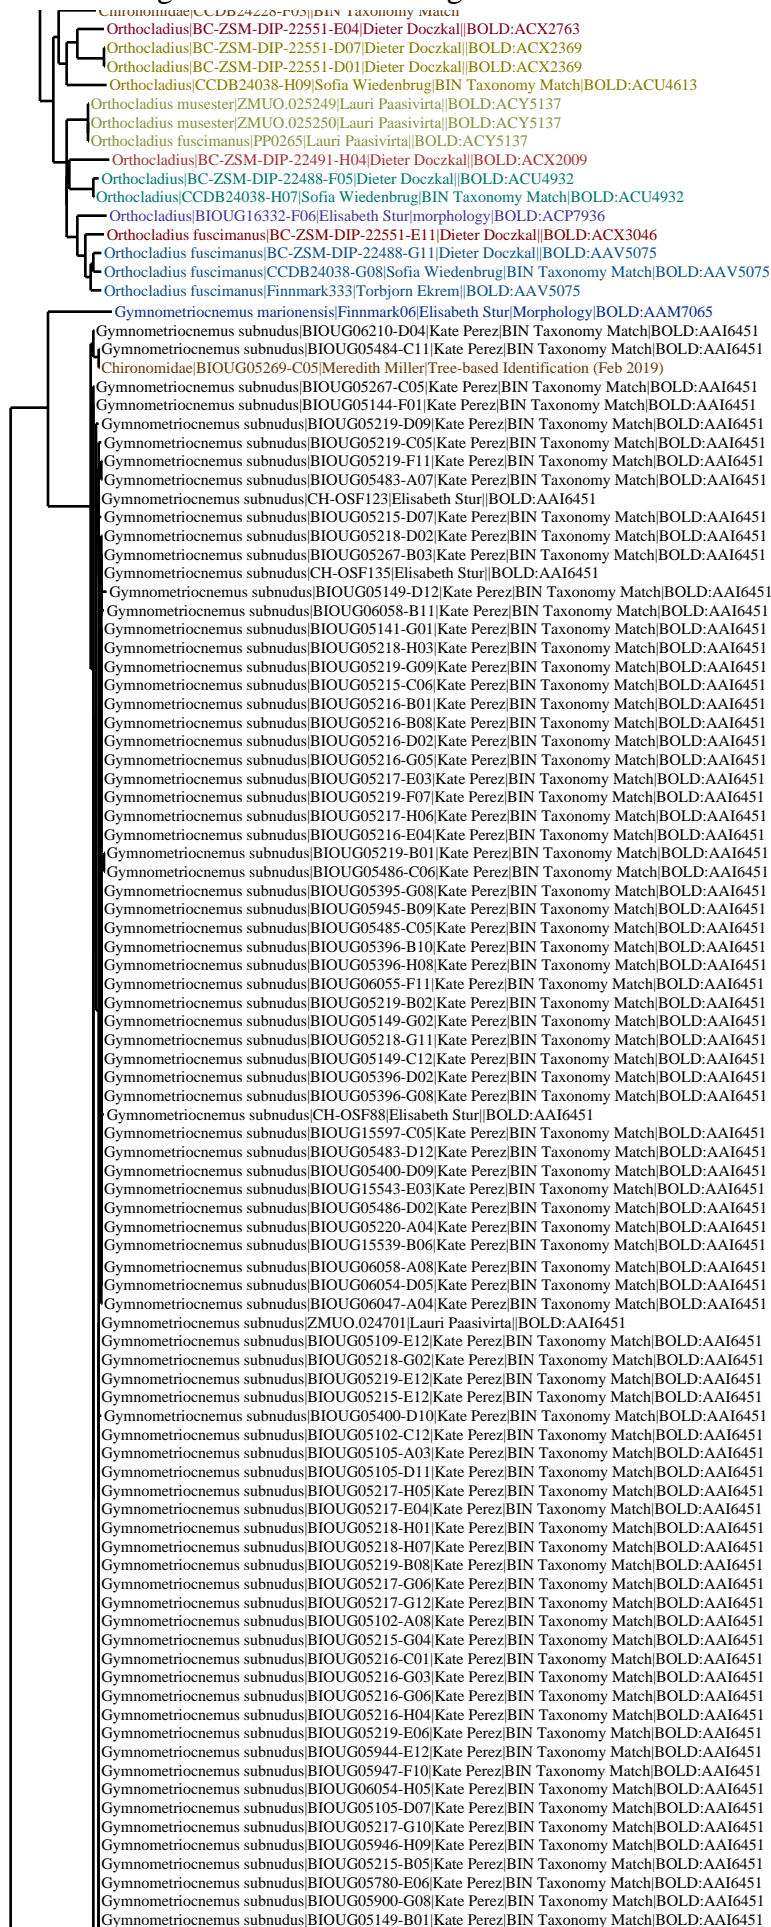





Gymnometrioctenus subnudus|BIOUG05396-E07|Kate Perez|BIN Taxonomy Match|BOLD:AAI6451  
Gymnometrioctenus subnudus|BIOUG05220-D03|Kate Perez|BIN Taxonomy Match|BOLD:AAI6451  
Gymnometrioctenus subnudus|ATNA280|Elisabeth Stur|BOLD:AAI6451  
Gymnometrioctenus subnudus|BIOUG05947-G11|Kate Perez|BIN Taxonomy Match|BOLD:AAI6451  
Gymnometrioctenus subnudus|BIOUG05219-A07|Kate Perez|BIN Taxonomy Match|BOLD:AAI6451  
Gymnometrioctenus subnudus|BIOUG05141-F03|Kate Perez|BIN Taxonomy Match|BOLD:AAI6451  
Gymnometrioctenus subnudus|BIOUG05142-C10|Kate Perez|BIN Taxonomy Match|BOLD:AAI6451  
Gymnometrioctenus subnudus|BIOUG05219-F08|Kate Perez|BIN Taxonomy Match|BOLD:AAI6451  
Gymnometrioctenus subnudus|BIOUG05219-H03|Kate Perez|BIN Taxonomy Match|BOLD:AAI6451  
Gymnometrioctenus subnudus|BIOUG06062-H06|Kate Perez|BIN Taxonomy Match|BOLD:AAI6451  
Gymnometrioctenus subnudus|BIOUG05108-H06|Kate Perez|BIN Taxonomy Match|BOLD:AAI6451  
Gymnometrioctenus subnudus|BIOUG05149-G04|Kate Perez|BIN Taxonomy Match|BOLD:AAI6451  
Gymnometrioctenus subnudus|BIOUG05217-G07|Kate Perez|BIN Taxonomy Match|BOLD:AAI6451  
Gymnometrioctenus subnudus|BIOUG05215-E09|Kate Perez|BIN Taxonomy Match|BOLD:AAI6451  
Gymnometrioctenus subnudus|BIOUG05216-C05|Kate Perez|BIN Taxonomy Match|BOLD:AAI6451  
Gymnometrioctenus subnudus|BIOUG05216-D03|Kate Perez|BIN Taxonomy Match|BOLD:AAI6451  
Gymnometrioctenus subnudus|BIOUG05216-E12|Kate Perez|BIN Taxonomy Match|BOLD:AAI6451  
Gymnometrioctenus subnudus|BIOUG05216-H07|Kate Perez|BIN Taxonomy Match|BOLD:AAI6451  
Gymnometrioctenus subnudus|BIOUG05218-D06|Kate Perez|BIN Taxonomy Match|BOLD:AAI6451  
Gymnometrioctenus subnudus|BIOUG06053-G07|Kate Perez|BIN Taxonomy Match|BOLD:AAI6451  
Gymnometrioctenus subnudus|BIOUG06062-B08|Kate Perez|BIN Taxonomy Match|BOLD:AAI6451  
Gymnometrioctenus subnudus|BIOUG06055-F02|Kate Perez|BIN Taxonomy Match|BOLD:AAI6451  
Gymnometrioctenus subnudus|BIOUG05485-G12|Kate Perez|BIN Taxonomy Match|BOLD:AAI6451  
Gymnometrioctenus subnudus|BIOUG05218-F12|Kate Perez|BIN Taxonomy Match|BOLD:AAI6451  
Gymnometrioctenus subnudus|BIOUG05219-C03|Kate Perez|BIN Taxonomy Match|BOLD:AAI6451  
Gymnometrioctenus subnudus|BIOUG05215-F06|Kate Perez|BIN Taxonomy Match|BOLD:AAI6451  
Gymnometrioctenus subnudus|BIOUG06051-F04|Kate Perez|BIN Taxonomy Match|BOLD:AAI6451  
Gymnometrioctenus subnudus|BIOUG05396-H10|Kate Perez|BIN Taxonomy Match|BOLD:AAI6451  
Gymnometrioctenus subnudus|BIOUG05486-A01|Kate Perez|BIN Taxonomy Match|BOLD:AAI6451  
Gymnometrioctenus subnudus|BIOUG05215-E11|Kate Perez|BIN Taxonomy Match|BOLD:AAI6451  
Gymnometrioctenus subnudus|BIOUG05778-H01|Kate Perez|BIN Taxonomy Match|BOLD:AAI6451  
Gymnometrioctenus subnudus|BIOUG05778-A01|Kate Perez|BIN Taxonomy Match|BOLD:AAI6451  
Gymnometrioctenus subnudus|BIOUG06056-H09|Kate Perez|BIN Taxonomy Match|BOLD:AAI6451  
Gymnometrioctenus subnudus|BIOUG06052-A02|Kate Perez|BIN Taxonomy Match|BOLD:AAI6451  
Gymnometrioctenus subnudus|BIOUG05947-F07|Kate Perez|BIN Taxonomy Match|BOLD:AAI6451  
Gymnometrioctenus subnudus|BIOUG05947-A02|Kate Perez|BIN Taxonomy Match|BOLD:AAI6451  
Tavastia alticrista|CCDB21606-H02|Sofia Wiedenbrug|BOLD:ACT6409  
Tavastia alticrista|CCDB24183-D12|Sofia Wiedenbrug|Morphology|BOLD:ACT6409  
Tavastia alticrista|CCDB24183-D07|Sofia Wiedenbrug|Bin-match|BOLD:ACT6409  
Tavastia|SOE323|Elisabeth Stur|BOLD:AAH2947  
Tavastia|BIOUG15562-E12|Kate Perez|BIN Taxonomy Match|BOLD:AAH2947  
Tavastia|SOE325|Elisabeth Stur|BOLD:AAH2947  
Tavastia|BIOUG05144-E03|Kate Perez|BIN Taxonomy Match|BOLD:AAH2947  
Tavastia|BIOUG05141-A08|Kate Perez|BIN Taxonomy Match|BOLD:AAH2947  
Tavastia|BIOUG05149-A01|Kate Perez|BIN Taxonomy Match|BOLD:AAH2947  
Tavastia|BIOUG05149-A02|Kate Perez|BIN Taxonomy Match|BOLD:AAH2947  
Tavastia|BIOUG05149-A04|Kate Perez|BIN Taxonomy Match|BOLD:AAH2947  
Tavastia|BIOUG15464-D05|Kate Perez|BIN Taxonomy Match|BOLD:AAH2947  
Tavastia|BIOUG15459-B07|Kate Perez|BIN Taxonomy Match|BOLD:AAH2947  
Tavastia|BIOUG15545-G12|Kate Perez|BIN Taxonomy Match|BOLD:AAH2947  
Tavastia|BIOUG15545-D07|Kate Perez|BIN Taxonomy Match|BOLD:AAH2947  
Tavastia|BIOUG15541-D04|Kate Perez|BIN Taxonomy Match|BOLD:AAH2947  
Tavastia|BIOUG05102-F01|Kate Perez|BIN Taxonomy Match|BOLD:AAH2947  
Chironomidae|BIOUG07809-G07|Meredit Miller|Tree-based Identification (Feb 2019)  
Gymnometrioctenus pallidus|BIOUG07806-G07|Kate Perez|BIN Taxonomy Match|BOLD:AAG6457  
Gymnometrioctenus pallidus|BIOUG07808-B03|Kate Perez|BIN Taxonomy Match|BOLD:AAG6457  
Gymnometrioctenus pallidus|BIOUG06209-F12|Kate Perez|BIN Taxonomy Match|BOLD:AAG6457  
Gymnometrioctenus pallidus|BIOUG05945-H09|Kate Perez|BIN Taxonomy Match|BOLD:AAG6457  
Gymnometrioctenus pallidus|BIOUG06096-E08|Kate Perez|BIN Taxonomy Match|BOLD:AAG6457  
Gymnometrioctenus pallidus|BIOUG06053-A07|Kate Perez|BIN Taxonomy Match|BOLD:AAG6457  
Gymnometrioctenus pallidus|BIOUG06058-G04|Kate Perez|BIN Taxonomy Match|BOLD:AAG6457  
Gymnometrioctenus pallidus|BIOUG05945-D09|Kate Perez|BIN Taxonomy Match|BOLD:AAG6457  
Gymnometrioctenus pallidus|BIOUG06275-G05|Kate Perez|BIN Taxonomy Match|BOLD:AAG6457  
Gymnometrioctenus pallidus|BIOUG05396-D01|Kate Perez|BIN Taxonomy Match|BOLD:AAG6457  
Gymnometrioctenus pallidus|BIOUG07568-B08|Kate Perez|BIN Taxonomy Match|BOLD:AAG6457  
Gymnometrioctenus pallidus|BIOUG06093-E07|Kate Perez|BIN Taxonomy Match|BOLD:AAG6457  
Gymnometrioctenus pallidus|BIOUG06087-C08|Kate Perez|BIN Taxonomy Match|BOLD:AAG6457  
Gymnometrioctenus pallidus|CH-OSF167|Elisabeth Stur|Morphology|BOLD:AAG6457  
Gymnometrioctenus pallidus|CH-OSF168|Elisabeth Stur|Morphology|BOLD:AAG6457  
Gymnometrioctenus pallidus|CH-eik47|Elisabeth Stur|Morphology|BOLD:AAG6457  
Gymnometrioctenus pallidus|CH-eik63|Elisabeth Stur|Morphology|BOLD:AAG6457  
Gymnometrioctenus pallidus|CH-eik64|Elisabeth Stur|Morphology|BOLD:AAG6457  
Chironomidae|DIPNO-0041|||BOLD:AAG6457  
Gymnometrioctenus pallidus|CH-eik131|Elisabeth Stur|Morphology|BOLD:AAG6457  
Gymnometrioctenus pallidus|BIOUG07413-D01|Kate Perez|BIN Taxonomy Match|BOLD:AAG6457  
Gymnometrioctenus pallidus|BIOUG05780-G08|Kate Perez|BIN Taxonomy Match|BOLD:AAG6457  
Gymnometrioctenus pallidus|BIOUG06100-E06|Kate Perez|BIN Taxonomy Match|BOLD:AAG6457  
Gymnometrioctenus pallidus|BIOUG06056-B11|Kate Perez|BIN Taxonomy Match|BOLD:AAG6457  
Gymnometrioctenus pallidus|BIOUG06056-G01|Kate Perez|BIN Taxonomy Match|BOLD:AAG6457  
Gymnometrioctenus pallidus|BIOUG06095-A12|Kate Perez|BIN Taxonomy Match|BOLD:AAG6457  
Gymnometrioctenus pallidus|BIOUG06053-H07|Kate Perez|BIN Taxonomy Match|BOLD:AAG6457  
Gymnometrioctenus pallidus|BIOUG07503-D11|Kate Perez|BIN Taxonomy Match|BOLD:AAG6457  
Gymnometrioctenus pallidus|BIOUG07415-B01|Kate Perez|BIN Taxonomy Match|BOLD:AAG6457  
Gymnometrioctenus pallidus|BIOUG07415-G11|Kate Perez|BIN Taxonomy Match|BOLD:AAG6457  
Gymnometrioctenus pallidus|BIOUG06090-D01|Kate Perez|BIN Taxonomy Match|BOLD:AAG6457  
Gymnometrioctenus pallidus|BIOUG06062-G10|Kate Perez|BIN Taxonomy Match|BOLD:AAG6457  
Gymnometrioctenus pallidus|BIOUG06086-G05|Kate Perez|BIN Taxonomy Match|BOLD:AAG6457  
Gymnometrioctenus pallidus|BIOUG06086-G01|Kate Perez|BIN Taxonomy Match|BOLD:AAG6457  
Gymnometrioctenus pallidus|BIOUG06065-B04|Kate Perez|BIN Taxonomy Match|BOLD:AAG6457  
Gymnometrioctenus pallidus|BIOUG05900-C03|Kate Perez|BIN Taxonomy Match|BOLD:AAG6457  
Gymnometrioctenus pallidus|BIOUG06062-D07|Kate Perez|BIN Taxonomy Match|BOLD:AAG6457  
Gymnometrioctenus pallidus|BIOUG06054-H11|Kate Perez|BIN Taxonomy Match|BOLD:AAG6457  
Gymnometrioctenus pallidus|BIOUG06054-A09|Kate Perez|BIN Taxonomy Match|BOLD:AAG6457  
Gymnometrioctenus pallidus|BIOUG06053-F02|Kate Perez|BIN Taxonomy Match|BOLD:AAG6457  
Gymnometrioctenus pallidus|BIOUG06053-D07|Kate Perez|BIN Taxonomy Match|BOLD:AAG6457  
Gymnometrioctenus pallidus|BIOUG05947-D06|Kate Perez|BIN Taxonomy Match|BOLD:AAG6457  
Gymnometrioctenus pallidus|BIOUG06208-G04|Kate Perez|BIN Taxonomy Match|BOLD:AAG6457  
Gymnometrioctenus pallidus|BIOUG06208-F08|Kate Perez|BIN Taxonomy Match|BOLD:AAG6457  
Gymnometrioctenus pallidus|BIOUG06208-E10|Kate Perez|BIN Taxonomy Match|BOLD:AAG6457  
Gymnometrioctenus pallidus|BIOUG06208-E03|Kate Perez|BIN Taxonomy Match|BOLD:AAG6457  
Gymnometrioctenus pallidus|BIOUG06094-H01|Kate Perez|BIN Taxonomy Match|BOLD:AAG6457  
Gymnometrioctenus pallidus|BIOUG06090-F11|Kate Perez|BIN Taxonomy Match|BOLD:AAG6457  
Gymnometrioctenus pallidus|BIOUG06090-F01|Kate Perez|BIN Taxonomy Match|BOLD:AAG6457









Gymnometricoemus kamimegavirgus|BIOUG05210-F04|Kate Perez|BIN Taxonomy Match|BOLD:AAE3567  
Gymnometricoemus kamimegavirgus|BIOUG05142-A02|Kate Perez|BIN Taxonomy Match|BOLD:AAE3567  
Gymnometricoemus kamimegavirgus|BIOUG05144-E04|Kate Perez|BIN Taxonomy Match|BOLD:AAE3567  
Gymnometricoemus kamimegavirgus|BIOUG05217-H01|Kate Perez|BIN Taxonomy Match|BOLD:AAE3567  
Gymnometricoemus|24376-C07|Kate Perez|BIN Taxonomy Match|BOLD:AAE3567  
Gymnometricoemus kamimegavirgus|BIOUG05149-C02|Kate Perez|BIN Taxonomy Match|BOLD:AAE3567  
Gymnometricoemus kamimegavirgus|BIOUG05149-G03|Kate Perez|BIN Taxonomy Match|BOLD:AAE3567  
Gymnometricoemus kamimegavirgus|BIOUG05101-C07|Kate Perez|BIN Taxonomy Match|BOLD:AAE3567  
Gymnometricoemus kamimegavirgus|BIOUG05399-F06|Kate Perez|BIN Taxonomy Match|BOLD:AAE3567  
Gymnometricoemus kamimegavirgus|CH-OSF32|Elisabeth Stur|Morphology|BOLD:AAE3567  
Gymnometricoemus|24376-D01|Kate Perez|BIN Taxonomy Match|BOLD:AAE3567  
Gymnometricoemus kamimegavirgus|BIOUG15460-A06|Elisabeth Stur|BIN Taxonomy Match|BOLD:AAE3567  
Gymnometricoemus kamimegavirgus|BIOUG15187-B12|Elisabeth Stur|BIN Taxonomy Match|BOLD:AAE3567  
Gymnometricoemus kamimegavirgus|CH-OSF29|Elisabeth Stur|Morphology|BOLD:AAE3567  
Gymnometricoemus kamimegavirgus|BIOUG05141-F04|Kate Perez|BIN Taxonomy Match|BOLD:AAE3567  
Chironomidae|BIOUG05269-B10|Meredith Miller|Tree-based Identification (Feb 2019)  
Chironomidae|BIOUG05269-H07|Meredith Miller|Tree-based Identification (Feb 2019)  
Gymnometricoemus kamimegavirgus|Finmark522|Elisabeth Stur|Morphology|BOLD:AAE3567  
Gymnometricoemus|24537-G01|Kate Perez|BIN Taxonomy Match|BOLD:AAE3567  
Gymnometricoemus|24375-D07|Kate Perez|BIN Taxonomy Match|BOLD:AAE3567  
Gymnometricoemus kamimegavirgus|BIOUG15454-H07|Elisabeth Stur|BIN Taxonomy Match|BOLD:AAE3567  
Gymnometricoemus|24376-B02|Kate Perez|BIN Taxonomy Match|BOLD:AAE3567  
Gymnometricoemus|24376-C08|Kate Perez|BIN Taxonomy Match|BOLD:AAE3567  
Gymnometricoemus|24355-B10|Kate Perez|BIN Taxonomy Match|BOLD:AAE3567  
Gymnometricoemus|24376-G06|Kate Perez|BIN Taxonomy Match|BOLD:AAE3567  
Gymnometricoemus|24374-D09|Kate Perez|BIN Taxonomy Match|BOLD:AAE3567  
Gymnometricoemus volitans|BIOUG04085-D04|Kate Perez|BIN Taxonomy Match|BOLD:AAE3567  
Gymnometricoemus kamimegavirgus|BIOUG15457-F03|Elisabeth Stur|BIN Taxonomy Match|BOLD:AAE3567  
Gymnometricoemus kamimegavirgus|BIOUG15456-B02|Elisabeth Stur|BIN Taxonomy Match|BOLD:AAE3567  
Gymnometricoemus|24374-E02|Kate Perez|BIN Taxonomy Match|BOLD:AAE3567  
Gymnometricoemus|24375-G02|Kate Perez|BIN Taxonomy Match|BOLD:AAE3567  
Gymnometricoemus|24407-D08|Kate Perez|BIN Taxonomy Match|BOLD:AAE3567  
Gymnometricoemus|24407-E12|Kate Perez|BIN Taxonomy Match|BOLD:AAE3567  
Gymnometricoemus|24374-B08|Kate Perez|BIN Taxonomy Match|BOLD:AAE3567  
Gymnometricoemus|24374-E10|Kate Perez|BIN Taxonomy Match|BOLD:AAE3567  
Gymnometricoemus|24375-B10|Kate Perez|BIN Taxonomy Match|BOLD:AAE3567  
Gymnometricoemus|24374-A04|Kate Perez|BIN Taxonomy Match|BOLD:AAE3567  
Gymnometricoemus|24538-B11|Kate Perez|BIN Taxonomy Match|BOLD:AAE3567  
Gymnometricoemus|24376-F02|Kate Perez|BIN Taxonomy Match|BOLD:AAE3567  
Gymnometricoemus|24374-H10|Kate Perez|BIN Taxonomy Match|BOLD:AAE3567  
Gymnometricoemus kamimegavirgus|BIOUG05215-C02|Kate Perez|BIN Taxonomy Match|BOLD:AAE3567  
Gymnometricoemus|24374-B04|Kate Perez|BIN Taxonomy Match|BOLD:AAE3567  
Gymnometricoemus|24375-C08|Kate Perez|BIN Taxonomy Match|BOLD:AAE3567  
Gymnometricoemus|24374-E11|Kate Perez|BIN Taxonomy Match|BOLD:AAE3567  
Gymnometricoemus kamimegavirgus|BIOUG15464-H11|Elisabeth Stur|BIN Taxonomy Match|BOLD:AAE3567  
Gymnometricoemus|24375-G12|Kate Perez|BIN Taxonomy Match|BOLD:AAE3567  
Gymnometricoemus|24375-D04|Kate Perez|BIN Taxonomy Match|BOLD:AAE3567  
Gymnometricoemus kamimegavirgus|BIOUG05218-G12|Kate Perez|BIN Taxonomy Match|BOLD:AAE3567  
Gymnometricoemus volitans|BIOUG04261-C11|Kate Perez|BIN Taxonomy Match|BOLD:AAE3567  
Gymnometricoemus volitans|BIOUG04085-E07|Kate Perez|BIN Taxonomy Match|BOLD:AAE3567  
Gymnometricoemus|24374-D02|Kate Perez|BIN Taxonomy Match|BOLD:AAE3567  
Gymnometricoemus|24467-B10|Kate Perez|BIN Taxonomy Match|BOLD:AAE3567  
Gymnometricoemus volitans|ZMUO.024521|Lauri Paasivirta|BOLD:AAE3567  
Gymnometricoemus volitans|ZMUO.024522|Lauri Paasivirta|BOLD:AAE3567  
Gymnometricoemus|24376-A04|Kate Perez|BIN Taxonomy Match|BOLD:AAE3567  
Gymnometricoemus volitans|BIOUG04261-C05|Kate Perez|BIN Taxonomy Match|BOLD:AAE3567  
Gymnometricoemus volitans|BIOUG04261-F02|Kate Perez|BIN Taxonomy Match|BOLD:AAE3567  
Gymnometricoemus volitans|BIOUG04261-F05|Kate Perez|BIN Taxonomy Match|BOLD:AAE3567  
Gymnometricoemus|24540-D06|Kate Perez|BIN Taxonomy Match|BOLD:AAE3567  
Gymnometricoemus kamimegavirgus|BIOUG15458-D07|Elisabeth Stur|BIN Taxonomy Match|BOLD:AAE3567  
Gymnometricoemus kamimegavirgus|BIOUG15184-A02|Elisabeth Stur|BIN Taxonomy Match|BOLD:AAE3567  
Gymnometricoemus|24374-D06|Kate Perez|BIN Taxonomy Match|BOLD:AAE3567  
Gymnometricoemus|24469-A08|Kate Perez|BIN Taxonomy Match|BOLD:AAE3567  
Gymnometricoemus|24374-G01|Kate Perez|BIN Taxonomy Match|BOLD:AAE3567  
Gymnometricoemus|24374-D10|Kate Perez|BIN Taxonomy Match|BOLD:AAE3567  
Gymnometricoemus kamimegavirgus|BIOUG15457-A09|Elisabeth Stur|BIN Taxonomy Match|BOLD:AAE3567  
Gymnometricoemus kamimegavirgus|BIOUG15675-D02|Elisabeth Stur|BIN Taxonomy Match|BOLD:AAE3567  
Gymnometricoemus kamimegavirgus|BIOUG15459-E12|Elisabeth Stur|BIN Taxonomy Match|BOLD:AAE3567  
Gymnometricoemus kamimegavirgus|BIOUG15455-C06|Elisabeth Stur|BIN Taxonomy Match|BOLD:AAE3567  
Gymnometricoemus kamimegavirgus|BIOUG15458-G03|Elisabeth Stur|BIN Taxonomy Match|BOLD:AAE3567  
Gymnometricoemus kamimegavirgus|BIOUG15541-B03|Elisabeth Stur|BIN Taxonomy Match|BOLD:AAE3567  
Gymnometricoemus kamimegavirgus|BIOUG15464-H01|Elisabeth Stur|BIN Taxonomy Match|BOLD:AAE3567  
Gymnometricoemus kamimegavirgus|Finmark370|Elisabeth Stur|Morphology|BOLD:AAE3567  
Gymnometricoemus kamimegavirgus|BIOUG05267-G05|Kate Perez|BIN Taxonomy Match|BOLD:AAE3567  
Gymnometricoemus kamimegavirgus|BIOUG05486-D04|Kate Perez|BIN Taxonomy Match|BOLD:AAE3567  
Gymnometricoemus kamimegavirgus|BIOUG05215-F09|Kate Perez|BIN Taxonomy Match|BOLD:AAE3567  
Gymnometricoemus kamimegavirgus|BIOUG05141-G02|Kate Perez|BIN Taxonomy Match|BOLD:AAE3567  
Gymnometricoemus kamimegavirgus|BIOUG05219-H04|Kate Perez|BIN Taxonomy Match|BOLD:AAE3567  
Gymnometricoemus kamimegavirgus|BIOUG05215-E02|Kate Perez|BIN Taxonomy Match|BOLD:AAE3567  
Gymnometricoemus kamimegavirgus|BIOUG05267-E01|Kate Perez|BIN Taxonomy Match|BOLD:AAE3567  
Gymnometricoemus kamimegavirgus|BIOUG05267-C12|Kate Perez|BIN Taxonomy Match|BOLD:AAE3567  
Gymnometricoemus kamimegavirgus|BIOUG05217-A11|Kate Perez|BIN Taxonomy Match|BOLD:AAE3567  
Gymnometricoemus kamimegavirgus|BIOUG05216-C10|Kate Perez|BIN Taxonomy Match|BOLD:AAE3567  
Gymnometricoemus kamimegavirgus|BIOUG05216-C06|Kate Perez|BIN Taxonomy Match|BOLD:AAE3567  
Gymnometricoemus kamimegavirgus|BIOUG05216-E01|Kate Perez|BIN Taxonomy Match|BOLD:AAE3567  
Gymnometricoemus kamimegavirgus|BIOUG05216-D04|Kate Perez|BIN Taxonomy Match|BOLD:AAE3567  
Gymnometricoemus kamimegavirgus|BIOUG05216-F01|Kate Perez|BIN Taxonomy Match|BOLD:AAE3567  
Gymnometricoemus kamimegavirgus|BIOUG05216-E07|Kate Perez|BIN Taxonomy Match|BOLD:AAE3567  
Gymnometricoemus kamimegavirgus|BIOUG05219-H08|Kate Perez|BIN Taxonomy Match|BOLD:AAE3567  
Gymnometricoemus kamimegavirgus|BIOUG05219-H06|Kate Perez|BIN Taxonomy Match|BOLD:AAE3567  
Gymnometricoemus kamimegavirgus|BIOUG05218-F08|Kate Perez|BIN Taxonomy Match|BOLD:AAE3567  
Gymnometricoemus kamimegavirgus|BIOUG05141-G04|Kate Perez|BIN Taxonomy Match|BOLD:AAE3567  
Gymnometricoemus kamimegavirgus|BIOUG05141-C02|Kate Perez|BIN Taxonomy Match|BOLD:AAE3567  
Gymnometricoemus kamimegavirgus|BIOUG05141-A01|Kate Perez|BIN Taxonomy Match|BOLD:AAE3567  
Gymnometricoemus kamimegavirgus|BIOUG05110-F11|Kate Perez|BIN Taxonomy Match|BOLD:AAE3567  
Gymnometricoemus kamimegavirgus|BIOUG05144-E01|Kate Perez|BIN Taxonomy Match|BOLD:AAE3567  
Gymnometricoemus kamimegavirgus|BIOUG05105-C03|Kate Perez|BIN Taxonomy Match|BOLD:AAE3567  
Gymnometricoemus kamimegavirgus|BIOUG05105-B01|Kate Perez|BIN Taxonomy Match|BOLD:AAE3567  
Gymnometricoemus kamimegavirgus|BIOUG05103-H03|Kate Perez|BIN Taxonomy Match|BOLD:AAE3567  
Gymnometricoemus kamimegavirgus|BIOUG05103-F01|Kate Perez|BIN Taxonomy Match|BOLD:AAE3567  
Gymnometricoemus kamimegavirgus|BIOUG05103-B04|Kate Perez|BIN Taxonomy Match|BOLD:AAE3567  
Gymnometricoemus kamimegavirgus|BIOUG05102-E11|Kate Perez|BIN Taxonomy Match|BOLD:AAE3567  
Gymnometricoemus kamimegavirgus|BIOUG05101-H03|Kate Perez|BIN Taxonomy Match|BOLD:AAE3567





Gymnometrioecnemus brumalis|CH-OSF14|Elisabeth Stur|BOLD:AAW0095  
Gymnometrioecnemus brumalis|CH-OSF13|Elisabeth Stur|BOLD:AAW0095  
Gymnometrioecnemus|BIOUG04269-D06|Kate Perez|BIN Taxonomy Match|BOLD:AAU6760  
Gymnometrioecnemus|BIOUG04261-B09|Kate Perez|BIN Taxonomy Match|BOLD:AAU6760  
Gymnometrioecnemus brumalis|BIOUG04261-E12|Kate Perez|BIN Taxonomy Match|BOLD:ACC1684  
Gymnometrioecnemus brumalis|Finmark58|Elisabeth Stur|BOLD:AAL3408  
Gymnometrioecnemus brumalis|SOE452|Elisabeth Stur  
Gymnometrioecnemus brumalis|NO31||BOLD:AAL3408  
Gymnometrioecnemus brumalis|Finmark484|Elisabeth Stur|BOLD:AAL3408  
Gymnometrioecnemus brumalis|BIOUG04269-A09|Kate Perez|BIN Taxonomy Match|BOLD:AAL3408  
Gymnometrioecnemus brumalis|Finmark324|Elisabeth Stur|BOLD:AAL3408  
Gymnometrioecnemus brumalis|ZSM-DIP-33130-G03|Caroline Chimeno|BIN Taxonomy Match (Jan 2022)...  
Gymnometrioecnemus brumalis|ZSM-DIP-33143-C02|Caroline Chimeno|BIN Taxonomy Match (Jan 2022)...  
Gymnometrioecnemus brumalis|ZSM-DIP-33130-F12|Caroline Chimeno|BIN Taxonomy Match (Jan 2022)...  
Gymnometrioecnemus brumalis|ZSM-DIP-33132-H11|Caroline Chimeno|BIN Taxonomy Match (Jan 2022)...  
Chironomidae|CCDB24037-H01|BIN Taxonomy Match  
Gymnometrioecnemus brumalis|CCDB24037-H05|Sofia Wiedenbrug|BIN Taxonomy Match|BOLD:ACD4501  
Gymnometrioecnemus brumalis|ZSM34342-C03|Sofia Wiedenbrug|Morphology|BOLD:ACD4501  
Gymnometrioecnemus brumalis|ZSM34342-C11|Sofia Wiedenbrug|Morphology|BOLD:ACD4501  
Gymnometrioecnemus brumalis|CCDB24037-G12|Sofia Wiedenbrug|BIN Taxonomy Match|BOLD:ACD4501  
Gymnometrioecnemus brumalis|ZSM-DIP-33145-A12|Caroline Chimeno|BIN Taxonomy Match (Jan 2022)...  
Gymnometrioecnemus brumalis|BIOUG16777-A12|Renee Miskie|BIN Taxonomy Match (Oct 2021)  
Gymnometrioecnemus brumalis|BIOUG16785-D09|Kate Perez|BOLD ID Engine Manual|BOLD:ACD4501  
Gymnometrioecnemus brumalis|BIOUG16784-E06|Kate Perez|BOLD ID Engine Manual|BOLD:ACD4501  
Gymnometrioecnemus brumalis|BIOUG16740-H08|Kate Perez|BOLD ID Engine Manual|BOLD:ACD4501  
Gymnometrioecnemus brumalis|BIOUG16776-F10|Kate Perez|BOLD ID Engine Manual|BOLD:ACD4501  
Gymnometrioecnemus brumalis|BIOUG16784-A09|Kate Perez|BOLD ID Engine Manual|BOLD:ACD4501  
Gymnometrioecnemus brumalis|BIOUG16784-C02|Kate Perez|BOLD ID Engine Manual|BOLD:ACD4501  
Gymnometrioecnemus brumalis|BIOUG16740-A07|Kate Perez|BOLD ID Engine Manual|BOLD:ACD4501  
Gymnometrioecnemus brumalis|BIOUG16738-C07|Kate Perez|BOLD ID Engine Manual|BOLD:ACD4501  
Gymnometrioecnemus brumalis|BIOUG16738-D07|Kate Perez|BOLD ID Engine Manual|BOLD:ACD4501  
Gymnometrioecnemus brumalis|BIOUG16738-F04|Kate Perez|BOLD ID Engine Manual|BOLD:ACD4501  
Gymnometrioecnemus brumalis|BIOUG16740-H07|Kate Perez|BOLD ID Engine Manual|BOLD:ACD4501  
Gymnometrioecnemus brumalis|BIOUG16720-E11|Kate Perez|BOLD ID Engine Manual|BOLD:ACD4501  
Gymnometrioecnemus brumalis|BIOUG16720-G01|Kate Perez|BOLD ID Engine Manual|BOLD:ACD4501  
Gymnometrioecnemus brumalis|BIOUG16775-H02|Kate Perez|BOLD ID Engine Manual|BOLD:ACD4501  
Gymnometrioecnemus brumalis|BIOUG16784-C05|Kate Perez|BOLD ID Engine Manual|BOLD:ACD4501  
Gymnometrioecnemus brumalis|BIOUG16775-H07|Kate Perez|BOLD ID Engine Manual|BOLD:ACD4501  
Gymnometrioecnemus brumalis|BIOUG16779-H06|Kate Perez|BOLD ID Engine Manual|BOLD:ACD4501  
Gymnometrioecnemus brumalis|BIOUG16778-G04|Kate Perez|BOLD ID Engine Manual|BOLD:ACD4501  
Gymnometrioecnemus brumalis|BIOUG16776-G03|Kate Perez|BOLD ID Engine Manual|BOLD:ACD4501  
Gymnometrioecnemus brumalis|BIOUG16779-C05|Kate Perez|BOLD ID Engine Manual|BOLD:ACD4501  
Gymnometrioecnemus brumalis|BIOUG16721-F06|Kate Perez|BOLD ID Engine Manual|BOLD:ACD4501  
Gymnometrioecnemus brumalis|BIOUG16775-G06|Kate Perez|BOLD ID Engine Manual|BOLD:ACD4501  
Gymnometrioecnemus brumalis|BIOUG16739-G06|Kate Perez|BOLD ID Engine Manual|BOLD:ACD4501  
Gymnometrioecnemus brumalis|BIOUG16782-A11|Kate Perez|BOLD ID Engine Manual|BOLD:ACD4501  
Gymnometrioecnemus brumalis|BIOUG16720-B08|Kate Perez|BOLD ID Engine Manual|BOLD:ACD4501  
Gymnometrioecnemus brumalis|BIOUG16785-E07|Kate Perez|BOLD ID Engine Manual|BOLD:ACD4501  
Gymnometrioecnemus brumalis|BIOUG16777-B06|Kate Perez|BOLD ID Engine Manual|BOLD:ACD4501  
Gymnometrioecnemus brumalis|BIOUG16739-B02|Kate Perez|BOLD ID Engine Manual|BOLD:ACD4501  
Gymnometrioecnemus brumalis|ZSM-DIP-33132-G04|Caroline Chimeno|BIN Taxonomy Match (Jan 2022)...  
Gymnometrioecnemus brumalis|CCDB22605-F06|Sofia Wiedenbrug|BOLD:ACD4501  
Gymnometrioecnemus brumalis|ZSM-DIP-33143-D02|Caroline Chimeno|BIN Taxonomy Match (Jan 2022)...  
Gymnometrioecnemus brumalis|ZSM-DIP-33132-G03|Caroline Chimeno|BIN Taxonomy Match (Jan 2022)...  
Gymnometrioecnemus brumalis|ZSM-DIP-33132-G01|Caroline Chimeno|BIN Taxonomy Match (Jan 2022)...  
Gymnometrioecnemus brumalis|ZSM-DIP-33131-A03|Caroline Chimeno|BIN Taxonomy Match (Jan 2022)...  
Gymnometrioecnemus brumalis|ZSM-DIP-33132-F12|Caroline Chimeno|BIN Taxonomy Match (Jan 2022)...  
Gymnometrioecnemus brumalis|ZSM-DIP-33132-G02|Caroline Chimeno|BIN Taxonomy Match (Jan 2022)...  
Gymnometrioecnemus brumalis|ZSM-DIP-33132-G06|Caroline Chimeno|BIN Taxonomy Match (Jan 2022)...  
Gymnometrioecnemus brumalis|ZSM-DIP-33132-G07|Caroline Chimeno|BIN Taxonomy Match (Jan 2022)...  
Gymnometrioecnemus brumalis|ZSM-DIP-33132-G09|Caroline Chimeno|BIN Taxonomy Match (Jan 2022)...  
Gymnometrioecnemus brumalis|ZSM-DIP-33130-B08|Caroline Chimeno|BIN Taxonomy Match (Jan 2022)...  
Gymnometrioecnemus brumalis|ZSM-DIP-33131-A02|Caroline Chimeno|BIN Taxonomy Match (Jan 2022)...  
Gymnometrioecnemus brumalis|ZSM-DIP-33131-B09|Caroline Chimeno|BIN Taxonomy Match (Jan 2022)...  
Gymnometrioecnemus brumalis|ZSM-DIP-33131-B10|Caroline Chimeno|BIN Taxonomy Match (Jan 2022)...  
Gymnometrioecnemus brumalis|ZSM-DIP-33141-C08|Caroline Chimeno|BIN Taxonomy Match (Jan 2022)...  
Gymnometrioecnemus brumalis|ZSM-DIP-33145-C11|Caroline Chimeno|BIN Taxonomy Match (Jan 2022)...  
Gymnometrioecnemus brumalis|ZSM-DIP-33145-C12|Caroline Chimeno|BIN Taxonomy Match (Jan 2022)...  
Gymnometrioecnemus brumalis|ZSM-DIP-33131-A06|Caroline Chimeno|BIN Taxonomy Match (Jan 2022)...  
Gymnometrioecnemus brumalis|CCDB22605-D12|Sofia Wiedenbrug|BOLD:ACD4501  
Gymnometrioecnemus brumalis|ZSM-DIP-33131-B08|Caroline Chimeno|BIN Taxonomy Match (Jan 2022)...  
Gymnometrioecnemus brumalis|ZSM-DIP-33130-F10|Caroline Chimeno|BIN Taxonomy Match (Jan 2022)...  
Gymnometrioecnemus autumnalis|Finmark201|Elisabeth Stur|Morphology|BOLD:AAM3286  
Gymnometrioecnemus autumnalis|ATNA481|Elisabeth Stur|Morphology|BOLD:AAM3286  
Gymnometrioecnemus autumnalis|Finmark563|Elisabeth Stur|Morphology|BOLD:AAM3286  
Gymnometrioecnemus autumnalis|Finmark282|Elisabeth Stur|Morphology  
Metrioecnemus|ZMUO.025825|Lauri Paasivirta|BOLD:ACC5504  
Tvetenia verralli|ZMUO.025946|Lauri Paasivirta|BOLD:AAW8775  
Tvetenia tshernovskii|Finmark817|Elisabeth Stur|BOLD:AAW8775  
Tvetenia tshernovskii|Finmark823|Elisabeth Stur|BOLD:AAW8775  
Tvetenia tshernovskii|Finmark809|Elisabeth Stur|BOLD:AAW8775  
Tvetenia tshernovskii|Finmark808|Elisabeth Stur|BOLD:AAW8775  
Tvetenia verralli|ZMUO.025945|Lauri Paasivirta|BOLD:AAW8775  
Tvetenia discoloripes|EJV-20110214|Lauri Paasivirta|BOLD:AAW8775  
Tavastia ygdrasilia|ZMUO.025179|Lauri Paasivirta|BOLD:ADA7473  
Tavastia ygdrasilia|ZMUO.025178|Lauri Paasivirta|BOLD:ADA7473  
Orthocladus cf. abiskoensis|Finmark712|Torbjorn Ekrem|BOLD:AAV2830  
Orthocladus cf. abiskoensis|Finmark714|Torbjorn Ekrem|BOLD:AAV2831  
Orthocladus cf. abiskoensis|Finmark426|Torbjorn Ekrem|BOLD:AAV2831  
Chaetocladus minutissimus|ES264|Elisabeth Stur|BOLD:AAW6731  
Chaetocladus perennis|BIOUG15952-C10|Elisabeth Stur|BIN Taxonomy Match|BOLD:ACF6903  
Chaetocladus aff. perennis|ZSM34342-A11|Sofia Wiedenbrug|Morphology|BOLD:ACF6903  
Chaetocladus perennis|CCDB24038-B02|Jerome Moriniere|BIN Taxonomy Match|BOLD:ACF6903  
Chaetocladus perennis|BIOUG16721-A12|Jerome Moriniere|BIN Taxonomy Match|BOLD:ACF6903  
Chaetocladus perennis|BC-ZSM-DIP-22491-F01|Dieter Doczkal|BIN Taxonomy Match|BOLD:ACF6903  
Chaetocladus perennis|ZSM-DIP-33130-E06|Caroline Chimeno|BIN Taxonomy Match (Jan 2022)|BOL...  
Chaetocladus perennis|BIOUG16785-C12|Jerome Moriniere|BIN Taxonomy Match|BOLD:ACF6903  
Chaetocladus perennis|BC-ZSM-DIP-22491-F05|Dieter Doczkal|BIN Taxonomy Match|BOLD:ACF6903  
Chaetocladus perennis|BIOUG16721-F03|Jerome Moriniere|BIN Taxonomy Match|BOLD:ACF6903  
Chaetocladus perennis|BC-ZSM-DIP-22491-D02|Dieter Doczkal|BIN Taxonomy Match|BOLD:ACF6903  
Chaetocladus perennis|ZSM-DIP-33136-B09|Caroline Chimeno|BIN Taxonomy Match (Jan 2022)|BOL...  
Chaetocladus perennis|BIOUG16853-E08|Jerome Moriniere|BIN Taxonomy Match|BOLD:ACF6903  
Chaetocladus perennis|CCDB24038-E04|Jerome Moriniere|BIN Taxonomy Match|BOLD:ACF6903

Chaetocladius perennis[ZSM-DIP-33136-B09]Caroline Chimento|BIN Taxonomy Match (Jan 2022)|BOLD:ACF6903  
 Chaetocladius perennis[BIOUG16853-E08]Jerome Moriniere|BIN Taxonomy Match|BOLD:ACF6903  
 Chaetocladius perennis[CCDB24038-E04]Jerome Moriniere|BIN Taxonomy Match|BOLD:ACF6903  
 Chaetocladius perennis[CCDB24039-G05]Jerome Moriniere|BIN Taxonomy Match|BOLD:ACF6903  
 Chaetocladius perennis[BC-ZSM-DIP-22551-F08]Dieter Doczkal|BIN Taxonomy Match|BOLD:ACF6903  
 Chaetocladius perennis[BC-ZSM-DIP-22491-E09]Dieter Doczkal|BIN Taxonomy Match|BOLD:ACF6903  
 Chaetocladius perennis[CCDB24038-B01]Jerome Moriniere|BIN Taxonomy Match|BOLD:ACF6903  
 Chaetocladius perennis[CCDB24039-F12]Jerome Moriniere|BIN Taxonomy Match|BOLD:ACF6903  
 Chaetocladius perennis[BC-ZSM-DIP-22491-F03]Dieter Doczkal|BIN Taxonomy Match|BOLD:ACF6903  
 Chaetocladius perennis[BC-ZSM-DIP-22488-E07]Dieter Doczkal|BIN Taxonomy Match|BOLD:ACF6903  
 Chaetocladius perennis[BIOUG16739-E09]Jerome Moriniere|BIN Taxonomy Match|BOLD:ACF6903  
 Chaetocladius perennis[CCDB24038-D03]Jerome Moriniere|BIN Taxonomy Match|BOLD:ACF6903  
 Chaetocladius perennis[BIOUG16261-C06]Elisabeth Stur|BIN Taxonomy Match|BOLD:ACF6903  
 Chaetocladius perennis[BIOUG15454-C12]Elisabeth Stur|BIN Taxonomy Match|BOLD:ACF6903  
 Chaetocladius aff. perennis[ZSM34342-B11]Sofia Wiedenbrug|Morphology|BOLD:ACF6903  
 Chaetocladius perennis[BIOUG15459-G12]Kate Perez|BIN Taxonomy Match|BOLD:ACF6903  
 Chaetocladius perennis[TRD-CH115]Elisabeth Stur|morphology|BOLD:ACF6903  
 Chaetocladius perennis[BIOUG17025-G05]Elisabeth Stur|BIN Taxonomy Match|BOLD:ACF6903  
 Chaetocladius perennis[TRD-CH87]Elisabeth Stur|morphology|BOLD:ACF6903  
 Chaetocladius perennis[TRD-CH120]Elisabeth Stur|BOLD:ACF6903  
 Chaetocladius perennis[ZMUO.024519]Lauri Paasivirta|BOLD:ACF6903  
 Chaetocladius perennis[BIOUG14592-A03]Kate Perez|BIN Taxonomy Match|BOLD:ACF6903  
 Chaetocladius perennis[ZMUO.024520]Lauri Paasivirta|BOLD:ACF6903  
 Chaetocladius perennis[BIOUG16720-G05]Jerome Moriniere|BIN Taxonomy Match|BOLD:ACF6903  
 Chaetocladius perennis[BIOUG16739-A11]Jerome Moriniere|BIN Taxonomy Match|BOLD:ACF6903  
 Chaetocladius perennis[BIOUG16721-E03]Jerome Moriniere|BIN Taxonomy Match|BOLD:ACF6903  
 Chaetocladius perennis[BIOUG14592-G08]Elisabeth Stur|BIN Taxonomy Match|BOLD:ACF6903  
 Chaetocladius perennis[BIOUG17025-F01]Elisabeth Stur|BIN Taxonomy Match|BOLD:ACF6903  
 Chaetocladius perennis[CH-OSF07]Elisabeth Stur|BOLD:ACF6903  
 Chaetocladius perennis[BIOUG14592-A08]Elisabeth Stur|BIN Taxonomy Match|BOLD:ACF6903  
 Chaetocladius perennis[BIOUG16333-E01]Elisabeth Stur|BIN Taxonomy Match|BOLD:ACF6903  
 Chaetocladius perennis[BIOUG14592-A07]Elisabeth Stur|BIN Taxonomy Match|BOLD:ACF6903  
 Chaetocladius perennis[BIOUG15762-B04]Kate Perez|BIN Taxonomy Match (Jun 2019)|BOLD:ACF6903  
 Chaetocladius perennis[BIOUG17025-C03]Elisabeth Stur|BIN Taxonomy Match|BOLD:ACF6903  
 Chaetocladius perennis[BIOUG15766-C03]Elisabeth Stur|BIN Taxonomy Match|BOLD:ACF6903  
 Chaetocladius perennis[BIOUG14592-A04]Elisabeth Stur|BIN Taxonomy Match|BOLD:ACF6903  
 Chaetocladius perennis[BC-ZSM-DIP-22491-H10]Dieter Doczkal|BIN Taxonomy Match|BOLD:ACF6903  
 Chaetocladius perennis[BIOUG17064-H06]Elisabeth Stur|BIN Taxonomy Match|BOLD:ACF6903  
 Chaetocladius perennis[BIOUG15761-B01]Elisabeth Stur|BIN Taxonomy Match|BOLD:ACF6903  
 Chaetocladius tenuistylus[ZMUO.026268]Lauri Paasivirta|BOLD:AA5376  
 Chaetocladius tenuistylus[ZMUO.026267]Lauri Paasivirta|BOLD:AA5376  
 Chaetocladius tenuistylus[Finmark274]Elisabeth Stur|BOLD:AA5376  
 Rheosmittia spincornis[ZMUO.024825]Lauri Paasivirta|BOLD:ACM1900  
 Rheosmittia[ATNA582]Elisabeth Stur|morphology|BOLD:ACT6262  
 Rheosmittia spincornis[ZMUO.024826]Lauri Paasivirta|BOLD:ACT6262  
 Rheosmittia[EBAI-Ch263]Elisabeth Stur|morphology|BOLD:ACT6262  
 Rheosmittia sp. 1ES[TRD-CH407]Elisabeth Stur|morphology|BOLD:ACT6262  
 Rheosmittia sp. 1ES[TRD-CH197]Elisabeth Stur|morphology|BOLD:ACT6262  
 Heterotanytarsus apicalis[ZMUO.024278]Lauri Paasivirta|BOLD:AAB8663  
 Heterotanytarsus apicalis[ZMUO.024277]Lauri Paasivirta|BOLD:AAB8663  
 Heterotanytarsus apicalis[Finmark651]Elisabeth Stur|BOLD:AAB8663  
 Heterotanytarsus apicalis[Finmark48]Elisabeth Stur|BOLD:AAB8663  
 Heterotanytarsus apicalis[Finmark535]Elisabeth Stur|BOLD:AAB8663  
 Heterotanytarsus apicalis[Finmark520]Elisabeth Stur|BOLD:AAB8663  
 Heterotanytarsus apicalis[Finmark428]Elisabeth Stur|BOLD:AAB8663  
 Heterotanytarsus apicalis[SOE411]Elisabeth Stur|BOLD:AAB8663  
 Heterotanytarsus apicalis[TRD-CH103]Elisabeth Stur|BOLD:AAB8663  
 Heterotanytarsus apicalis[Finmark59]Elisabeth Stur|BOLD:AAB8663  
 Heterotanytarsus apicalis[Finmark537]Elisabeth Stur|BOLD:AAB8663  
 Heterotanytarsus apicalis[SOE174]Elisabeth Stur|BOLD:AAB8663  
 Heterotanytarsus apicalis[Finmark205]Elisabeth Stur|BOLD:AAB8663  
 Heterotanytarsus apicalis[SOE223]Elisabeth Stur|BOLD:AAB8663  
 Heterotanytarsus apicalis[SOE209]Elisabeth Stur|BOLD:AAB8663  
 Heterotanytarsus apicalis[SOE258]Elisabeth Stur|BOLD:AAB8663  
 Heterotanytarsus apicalis[SOE261]Elisabeth Stur|BOLD:AAB8663  
 Heterotanytarsus apicalis[SOE295]Elisabeth Stur|BOLD:AAB8663  
 Heterotanytarsus apicalis[SOE361]Elisabeth Stur|BOLD:AAB8663  
 Heterotanytarsus apicalis[SOE362]Elisabeth Stur|BOLD:AAB8663  
 Heterotanytarsus apicalis[SOE363]Elisabeth Stur|BOLD:AAB8663  
 Heterotanytarsus apicalis[Finmark832]Elisabeth Stur|BOLD:AAB8663  
 Heterotanytarsus apicalis[SOE413]Elisabeth Stur|BOLD:AAB8663  
 Heterotanytarsus apicalis[SOE427]Elisabeth Stur|BOLD:AAB8663  
 Heterotanytarsus apicalis[TRD-CH278]Elisabeth Stur|BOLD:AAB8663  
 Heterotanytarsus apicalis[NHRS-BYWS000001170]Yngve Brodin|morphology|BOLD:AAB8663  
 Heterotanytarsus apicalis[ZMUO.024843]Lauri Paasivirta|BOLD:AAB8663  
 Heterotanytarsus apicalis[SOE412]Elisabeth Stur|BOLD:AAB8663  
 Heterotanytarsus apicalis[SOE294]Elisabeth Stur|BOLD:AAB8663  
 Heterotanytarsus apicalis[SOE211]Elisabeth Stur|BOLD:AAB8663  
 Heterotanytarsus apicalis[SOE204]Elisabeth Stur|BOLD:AAB8663  
 Heterotanytarsus apicalis[TRD-CH102]Elisabeth Stur|BOLD:AAB8663  
 Heterotanytarsus apicalis[Finmark646]Elisabeth Stur|BOLD:AAB8663  
 Stackelbergina praeclara[Finmark677]Elisabeth Stur|BOLD:AAV2833  
 Aagaardia protensa[ZMUO.024920]Lauri Paasivirta|BOLD:ACC0018  
 Aagaardia[BIOUG04153-D02]Kate Perez|BIN Taxonomy Match|BOLD:ACC0018  
 Aagaardia protensa[NO 101]Elisabeth Stur|BOLD:ACC0018  
 Rheocricotopus[GBOL11569]Sofia Wiedenbrug|BOLD:ACT8739  
 Rheocricotopus[CCDB22605-C11]Sofia Wiedenbrug|BOLD:ACT8739  
 Rheocricotopus[GBOL11570]Sofia Wiedenbrug|BOLD:ACT8739  
 Rheocricotopus[CCDB22605-C12]Sofia Wiedenbrug|BOLD:ACT8739  
 Rheocricotopus[CCDB22605-C10]Sofia Wiedenbrug|BOLD:ACT8739  
 Rheocricotopus[CCDB22605-C09]Sofia Wiedenbrug|BOLD:ACT8739  
 Rheocricotopus[CCDB22605-C08]Sofia Wiedenbrug|BOLD:ACT8739  
 Rheocricotopus[CCDB22605-C06]Sofia Wiedenbrug|BOLD:ACT8739  
 Krenosmittia halvorseni[EBAI-Ch245]Elisabeth Stur|morphology  
 Krenosmittia halvorseni[ATNA400]Elisabeth Stur|BOLD:AAE5796  
 Krenosmittia halvorseni[ATNA234]Elisabeth Stur|BOLD:AAE5796  
 Krenosmittia halvorseni[ATNA399]Elisabeth Stur|BOLD:AAE5796  
 Krenosmittia halvorseni[ATNA254]Elisabeth Stur|BOLD:AAE5796  
 Krenosmittia sp. 1ES[Finmark191]Elisabeth Stur|BOLD:AAP6931  
 Krenosmittia halvorseni[ZMUO.025831]Lauri Paasivirta|BOLD:AAP6931  
 Krenosmittia sp. 1ES[ATNA525]Elisabeth Stur|BOLD:AAP6931  
 Krenosmittia sp. 1ES[ATNA524]Elisabeth Stur|BOLD:AAP6931

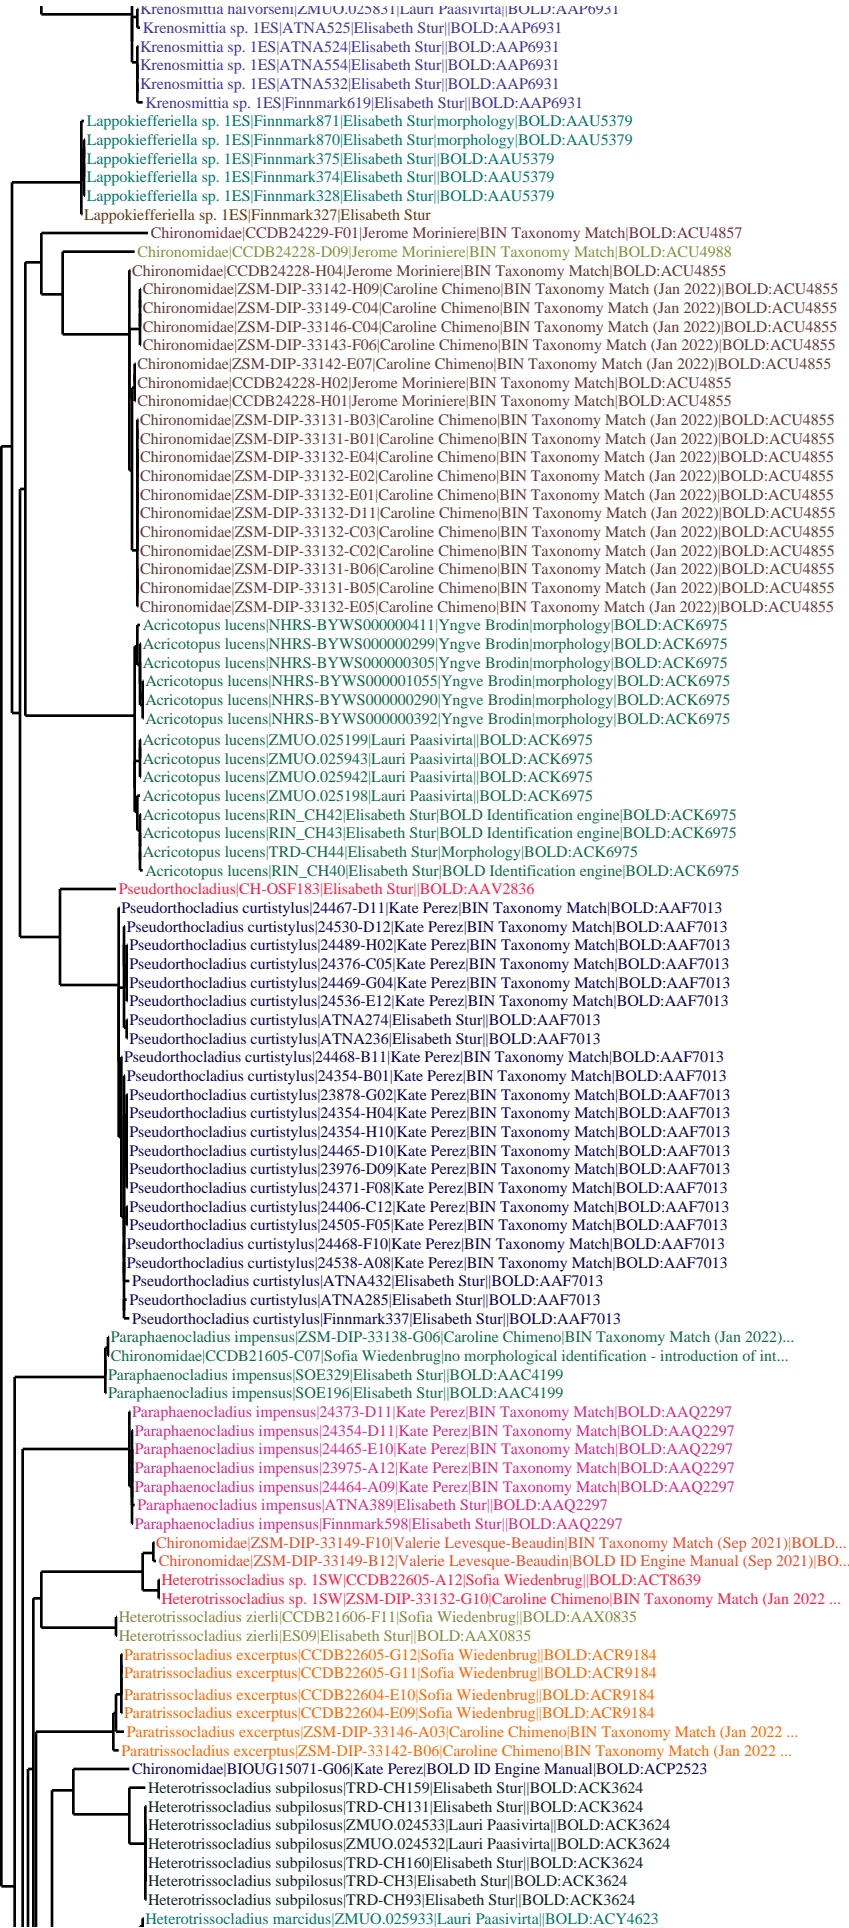

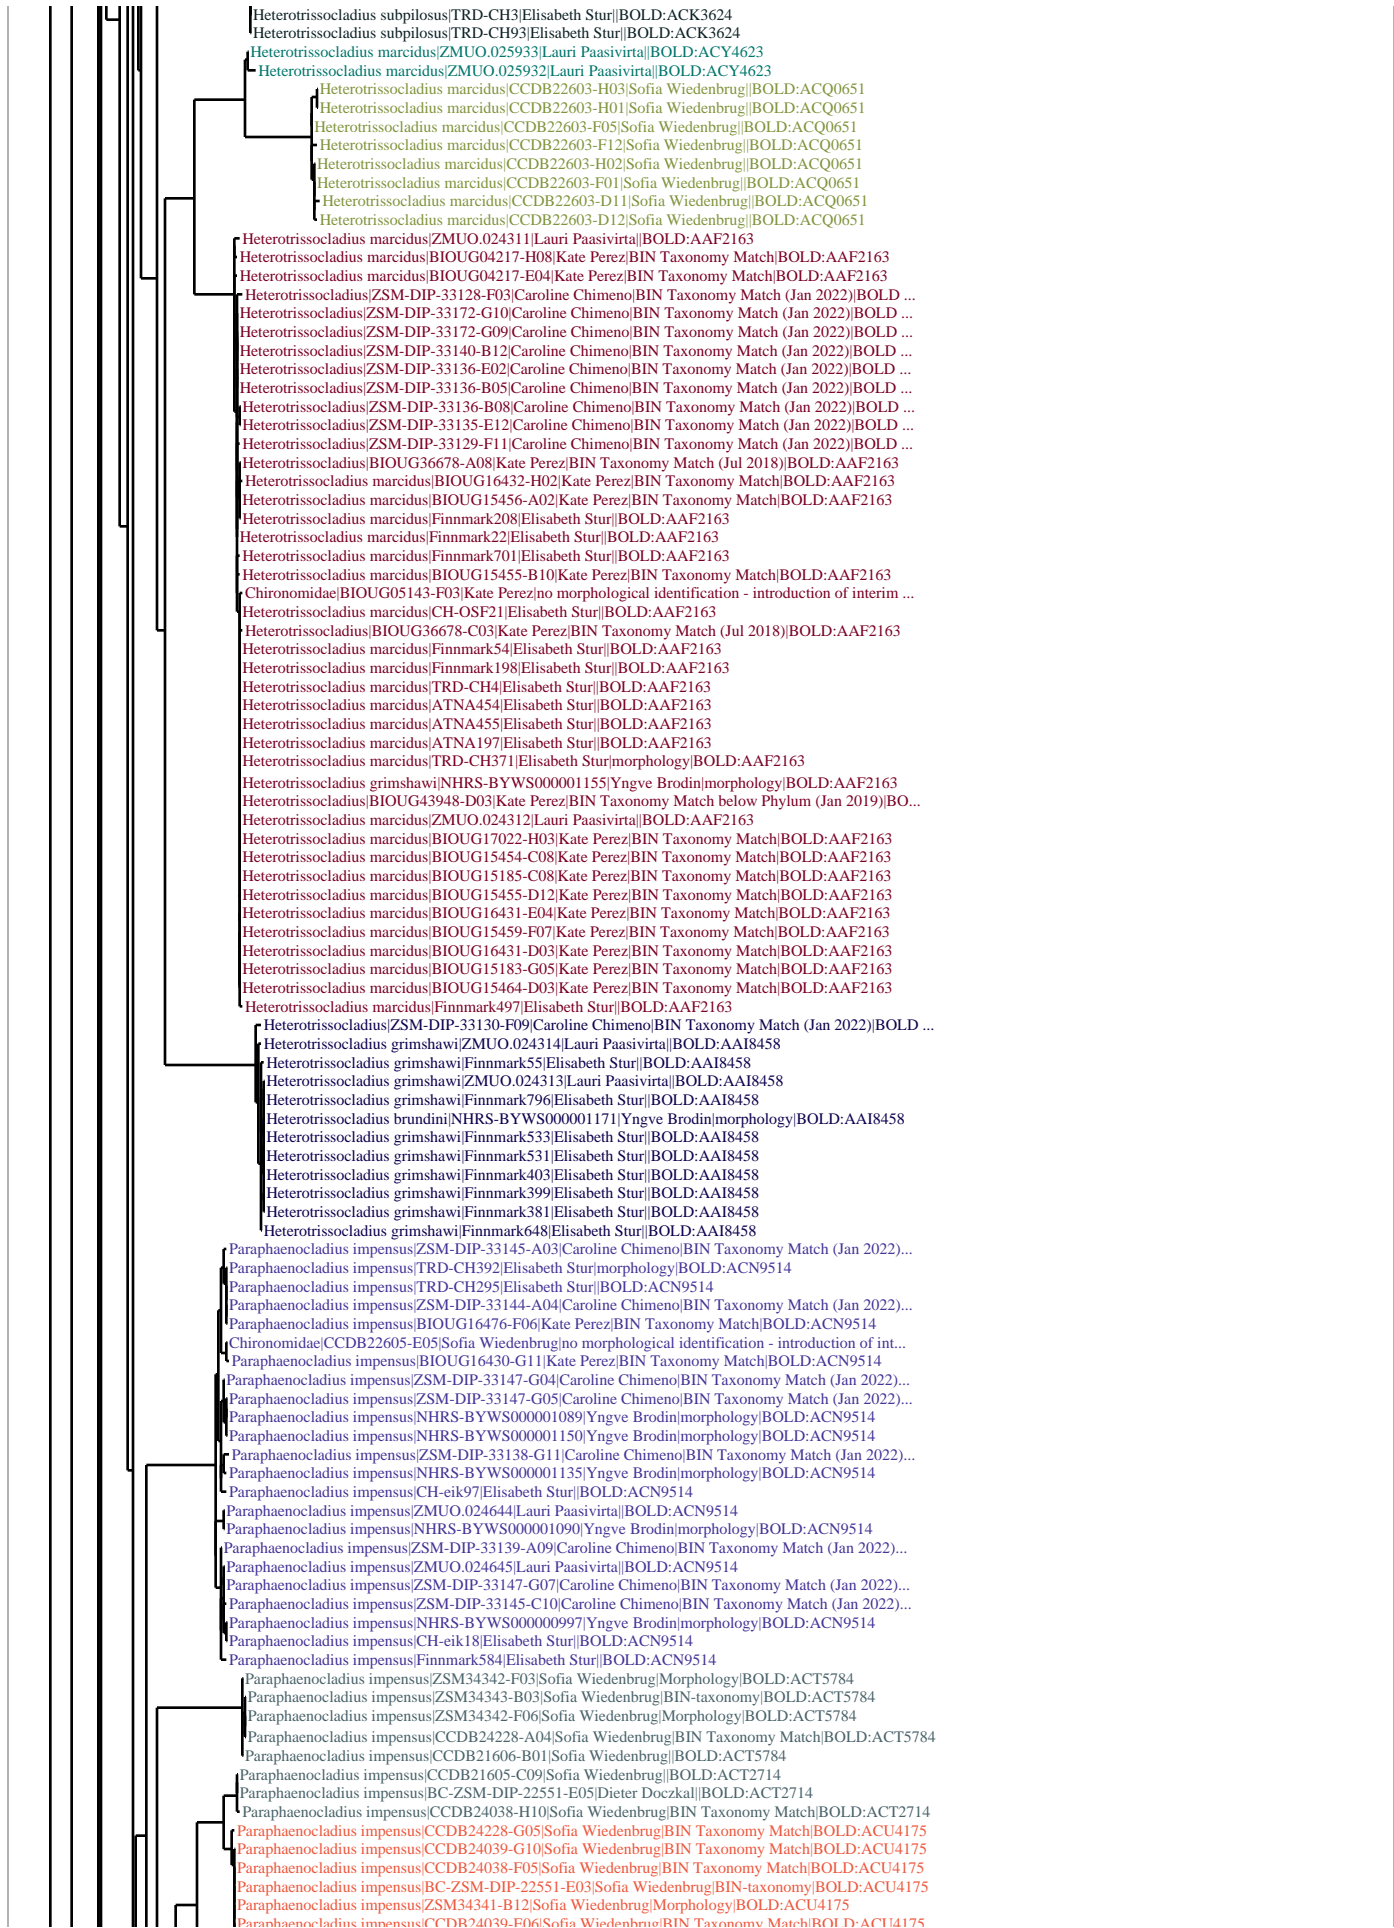

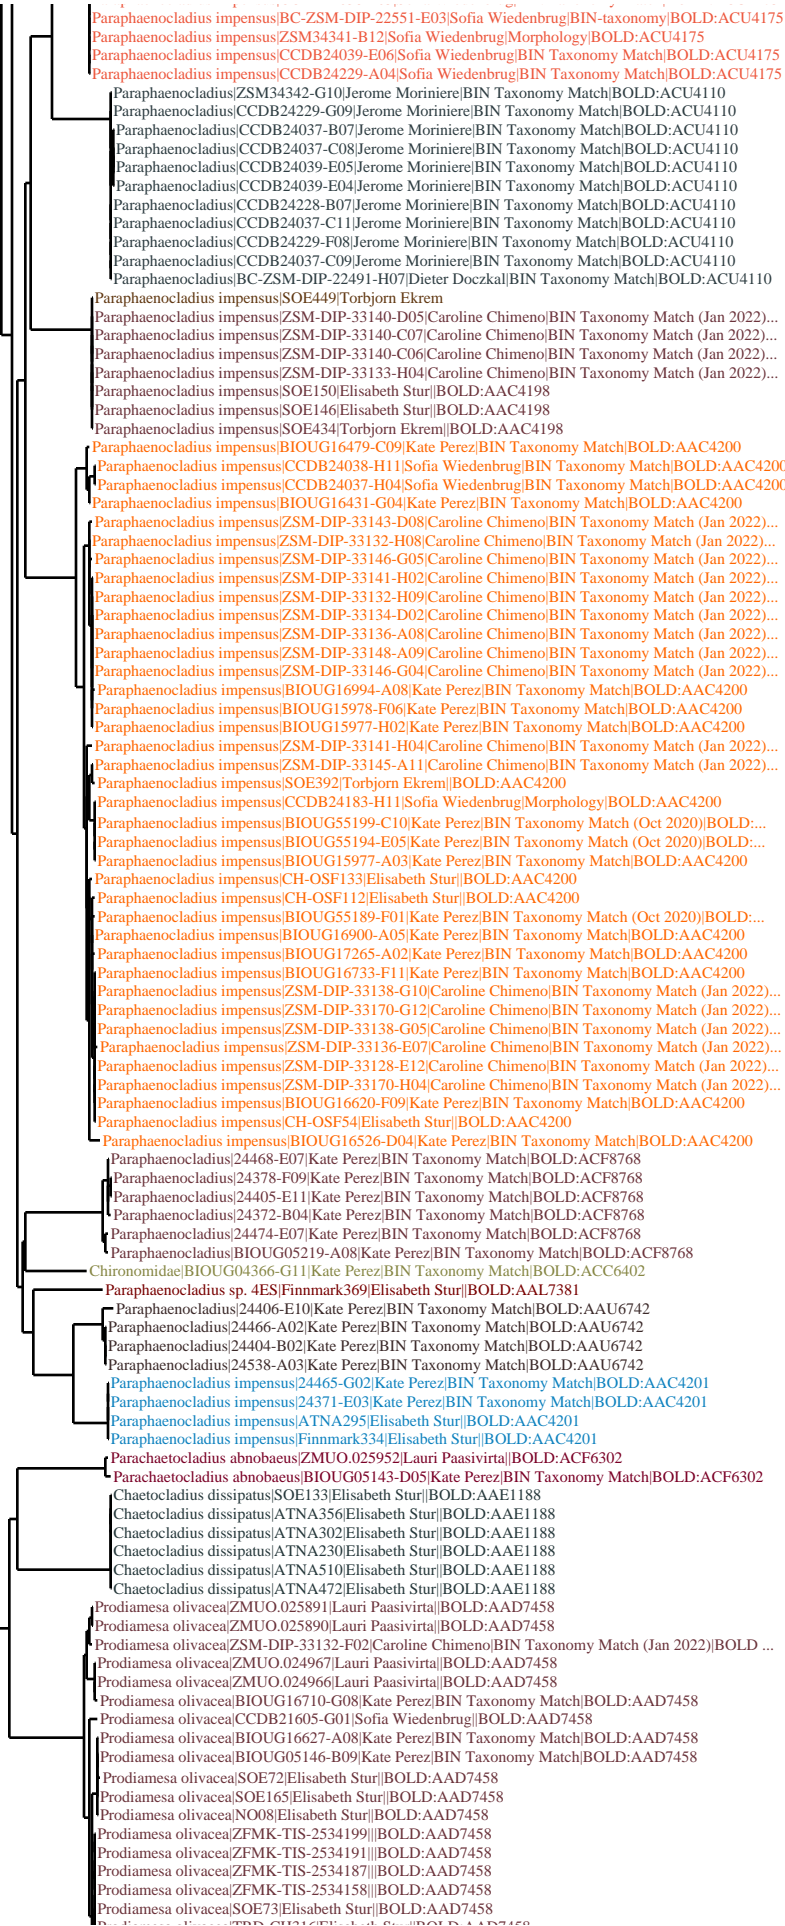

Prodiamesa olivacea|ZFMK-110-23416||BOLD:AAD7458  
Prodiamesa olivacea|ZFMK-TIS-2534158||BOLD:AAD7458  
Prodiamesa olivacea|SOE73|Elisabeth Sturj|BOLD:AAD7458  
Prodiamesa olivacea|TRD-CH316|Elisabeth Sturj|BOLD:AAD7458  
Prodiamesa olivacea|TRD-CH265|Elisabeth Sturj|BOLD:AAD7458  
Prodiamesa olivacea|BIOUG15855-B03|Kate Perez|BIN Taxonomy Match|BOLD:AAD7458  
Prodiamesa olivacea|NO07|Elisabeth Sturj|BOLD:AAD7458  
Prodiamesa olivacea|BIOUG17022-D12|Kate Perez|BIN Taxonomy Match|BOLD:AAD7458  
Prodiamesa olivacea|BIOUG16626-B08|Kate Perez|BIN Taxonomy Match|BOLD:AAD7458  
Prodiamesa olivacea|PK-192-70|Petra Kranzfelder|morphology|BOLD:AAD7458  
Prodiamesa olivacea|BIOUG17064-A08|Kate Perez|BIN Taxonomy Match|BOLD:AAD7458  
Prodiamesa olivacea|PK-192-62|Petra Kranzfelder|morphology|BOLD:AAD7458  
Prodiamesa olivacea|BIOUG16477-E03|Kate Perez|BIN Taxonomy Match|BOLD:AAD7458  
Prodiamesa olivacea|BIOUG16296-A01|Kate Perez|BIN Taxonomy Match|BOLD:AAD7458  
Prodiamesa olivacea|BIOUG15594-F11|Kate Perez|BIN Taxonomy Match|BOLD:AAD7458  
Prodiamesa olivacea|TRD-CH111|Elisabeth Sturj|BOLD:AAD7458  
Prodiamesa olivacea|SOE69|Elisabeth Sturj|BOLD:AAD7458  
Prodiamesa olivacea|TRD-CH166|Elisabeth Sturj|BOLD:AAD7458  
Prodiamesa olivacea|TRD-CH283|Elisabeth Sturj|BOLD:AAD7458  
Prodiamesa olivacea|BIOUG16626-G12|Kate Perez|BIN Taxonomy Match|BOLD:AAD7458  
Prodiamesa olivacea|NO48|Elisabeth Sturj|BOLD:AAD7458  
Orthocladinae|CCDB24037-E04|Sofia Wiedenbrug|BIN Taxonomy Match|BOLD:AAF7012  
Pseudorthocladus curtistylus|CCDB22603-G07|Sofia Wiedenbrug|BOLD:ACQ3153  
Pseudorthocladus curtistylus|ES40|Elisabeth Sturj|BOLD:AAF7012  
Parametricnemus borealpinus|EBAI-Ch267|Elisabeth Sturj|morphology|BOLD:AAL7338  
Parametricnemus borealpinus|ATNA494|Elisabeth Sturj|BOLD:AAL7338  
Parametricnemus borealpinus|Finnmark890|Elisabeth Sturj|BOLD:AAL7338  
Parametricnemus borealpinus|ATNA555|Elisabeth Sturj|BOLD:AAL7338  
Parametricnemus borealpinus|EBAI-Ch238|Elisabeth Sturj|morphology|BOLD:AAL7338  
Parametricnemus borealpinus|Finnmark597|Elisabeth Sturj|BOLD:AAL7338  
Pseudorthocladus pilosipennis|BIOUG05217-H10|Kate Perez|BIN Taxonomy Match|BOLD:AAL1600  
Pseudorthocladus pilosipennis|BIOUG05207-B05|Kate Perez|BIN Taxonomy Match|BOLD:AAL1600  
Pseudorthocladus pilosipennis|BIOUG05217-H11|Kate Perez|BIN Taxonomy Match|BOLD:AAL1600  
Pseudorthocladus pilosipennis|CCDB24183-A03|Sofia Wiedenbrug|Morphology|BOLD:AAL1600  
Pseudorthocladus pilosipennis|ZMUO.024968|Lauri Paasivirta|BOLD:AAL1600  
Pseudorthocladus pilosipennis|ZMUO.026352|Lauri Paasivirta|BOLD:AAL1600  
Pseudorthocladus pilosipennis|24416-B02|Kate Perez|BIN Taxonomy Match|BOLD:AAL1600  
Pseudorthocladus pilosipennis|ZMUO.026353|Lauri Paasivirta|BOLD:AAL1600  
Pseudorthocladus pilosipennis|24528-E11|Kate Perez|BIN Taxonomy Match|BOLD:AAL1600  
Pseudorthocladus pilosipennis|ATNA357|Elisabeth Sturj|BOLD:AAL1600  
Pseudorthocladus pilosipennis|BIOUG05215-E06|Kate Perez|BIN Taxonomy Match|BOLD:AAL1600  
Pseudorthocladus pilosipennis|BIOUG05220-H10|Kate Perez|BIN Taxonomy Match|BOLD:AAL1600  
Rheocricotopus reducus|ZMUO.025974|Lauri Paasivirta|BOLD:AAM7075  
Rheocricotopus reducus|Finnmark89|Elisabeth Sturj|BOLD:AAM7075  
Paraphaenocladus ACQ5239|CCDB22603-H07|Sofia Wiedenbrug|BOLD:ACQ5239  
Paraphaenocladus ACQ5239|CCDB22603-A06|Sofia Wiedenbrug|BOLD:ACQ5239  
Paraphaenocladus exagitans|CCDB21606-D01|Sofia Wiedenbrug|BOLD:ACT8523  
Paraphaenocladus exagitans|CCDB21606-D02|Sofia Wiedenbrug|BOLD:ACT8523  
Paraphaenocladus exagitans|CCDB24228-D05|Sofia Wiedenbrug|BIN Taxonomy Match|BOLD:ACT8523  
Paraphaenocladus exagitans|CCDB21606-A10|Sofia Wiedenbrug|BOLD:ACT8523  
Paraphaenocladus exagitans|CCDB24228-A03|Sofia Wiedenbrug|BIN Taxonomy Match|BOLD:ACT8523  
Paraphaenocladus exagitans|CCDB24228-B08|Sofia Wiedenbrug|BIN Taxonomy Match|BOLD:ACT8523  
Paraphaenocladus exagitans|CCDB24228-E12|Sofia Wiedenbrug|BIN Taxonomy Match|BOLD:ACT8523  
Paraphaenocladus exagitans|CCDB24037-C10|Sofia Wiedenbrug|BIN Taxonomy Match|BOLD:ACT8523  
Paraphaenocladus exagitans|ZSM34342-G07|Sofia Wiedenbrug|Morphology|BOLD:ACT8523  
Paraphaenocladus exagitans|BC-ZSM-DIP-22488-H10|Dieter Doczkal|BOLD:ACT8523  
Paraphaenocladus exagitans|CCDB24038-G06|Sofia Wiedenbrug|BIN Taxonomy Match|BOLD:ACT8523  
Paraphaenocladus exagitans|BC-ZSM-DIP-22491-E05|Dieter Doczkal|BOLD:ACT8523  
Paraphaenocladus|CCDB24038-F04|Sofia Wiedenbrug|BIN Taxonomy Match|BOLD:ACX1756  
Paraphaenocladus|BC-ZSM-DIP-22491-D04|Dieter Doczkal|BOLD:ACX1756  
Paraphaenocladus exagitans|BIOUG05215-C12|Kate Perez|BIN Taxonomy Match|BOLD:AAE3719  
Paraphaenocladus exagitans|CCDB24183-B04|Sofia Wiedenbrug|Morphology|BOLD:AAE3719  
Paraphaenocladus exagitans|CH-OSF132|Elisabeth Sturj|BOLD:AAE3719  
Paraphaenocladus exagitans|CH-OSF57|Elisabeth Sturj|BOLD:AAE3719  
Paraphaenocladus exagitans|ZMUO.024841|Lauri Paasivirta|BOLD:ACQ4724  
Paraphaenocladus exagitans|BIOUG05216-A04|Kate Perez|BIN Taxonomy Match|BOLD:ACQ4724  
Paraphaenocladus exagitans|BIOUG05207-E07|Kate Perez|BIN Taxonomy Match|BOLD:ACQ4724  
Paraphaenocladus exagitans|BIOUG05141-H02|Kate Perez|BIN Taxonomy Match|BOLD:ACQ4724  
Paraphaenocladus exagitans|SOE57|Elisabeth Sturj|BOLD:ACQ4724  
Paraphaenocladus exagitans|ATNA296|Elisabeth Sturj|BOLD:ACQ4724  
Paraphaenocladus exagitans|ZSM-DIP-33140-C11|Caroline Chimeno|BIN Taxonomy Match (Jan 2022 ...  
Paraphaenocladus exagitans|ZSM-DIP-33140-D08|Caroline Chimeno|BIN Taxonomy Match (Jan 2022 ...  
Paraphaenocladus exagitans|ZMUO.024842|Lauri Paasivirta|BOLD:ACQ4724  
Paraphaenocladus exagitans|ZSM-DIP-33131-G04|Caroline Chimeno|BIN Taxonomy Match (Jan 2022 ...  
Paraphaenocladus exagitans|ZSM-DIP-33131-G03|Caroline Chimeno|BIN Taxonomy Match (Jan 2022 ...  
Paraphaenocladus exagitans|ZSM-DIP-33131-G09|Caroline Chimeno|BIN Taxonomy Match (Jan 2022 ...  
Paraphaenocladus exagitans|ZSM-DIP-33137-B11|Caroline Chimeno|BIN Taxonomy Match (Jan 2022 ...  
Paraphaenocladus exagitans|ZSM-DIP-33137-B12|Caroline Chimeno|BIN Taxonomy Match (Jan 2022 ...  
Paraphaenocladus exagitans|ZSM-DIP-33139-D10|Caroline Chimeno|BIN Taxonomy Match (Jan 2022 ...  
Paraphaenocladus exagitans|ZSM-DIP-33139-E02|Caroline Chimeno|BIN Taxonomy Match (Jan 2022 ...  
Paraphaenocladus exagitans|ZSM-DIP-33139-E03|Caroline Chimeno|BIN Taxonomy Match (Jan 2022 ...  
Paraphaenocladus exagitans|ZSM-DIP-33139-E04|Caroline Chimeno|BIN Taxonomy Match (Jan 2022 ...  
Paraphaenocladus exagitans|ZSM-DIP-33139-E05|Caroline Chimeno|BIN Taxonomy Match (Jan 2022 ...  
Paraphaenocladus exagitans|ZSM-DIP-33139-E06|Caroline Chimeno|BIN Taxonomy Match (Jan 2022 ...  
Paraphaenocladus exagitans|ZSM-DIP-33139-E07|Caroline Chimeno|BIN Taxonomy Match (Jan 2022 ...  
Paraphaenocladus exagitans|ZSM-DIP-33140-C10|Caroline Chimeno|BIN Taxonomy Match (Jan 2022 ...  
Paraphaenocladus exagitans|ZSM-DIP-33131-G08|Caroline Chimeno|BIN Taxonomy Match (Jan 2022 ...  
Paraphaenocladus exagitans|SOE322|Torbjorn Ekrem|BOLD:ACQ4724  
Paraphaenocladus exagitans|ZSM-DIP-33134-E03|Caroline Chimeno|BIN Taxonomy Match (Jan 2022 ...  
Paraphaenocladus exagitans|NO24|Elisabeth Sturj|BOLD:ACQ4724  
Paraphaenocladus exagitans|SOE140|Elisabeth Sturj|BOLD:ACQ4724  
Paraphaenocladus exagitans|BIOUG05106-B07|Kate Perez|BIN Taxonomy Match|BOLD:ACQ4724  
Heterotrissocladius marcidus|ZMUO.029823|Marko Mutanen|BOLD:AD13620  
Heterotrissocladius sp. 2SW|GBOL11554|Sofia Wiedenbrug|bin taxonomy|BOLD:ACT0982  
Heterotrissocladius sp. 2SW|CCDB21605-G03|Sofia Wiedenbrug|BOLD:ACT0982  
Paraphaenocladus sp. 2ES|Finnmark319|Elisabeth Sturj|BOLD:AAV6218  
Paraphaenocladus sp. 2ES|Finnmark316|Elisabeth Sturj|BOLD:AAV6218  
Paraphaenocladus sp. 2ES|Finnmark315|Elisabeth Sturj|BOLD:AAV6218  
Bryophaenocladus|CCDB24229-A07|Sofia Wiedenbrug|BIN Taxonomy Match|BOLD:ACR1329  
Bryophaenocladus|BIOUG43077-F06|Kate Perez|BIN Taxonomy Match below Phylum (Jun 2019)|BOLD...  
Bryophaenocladus|BIOUG16709-B05|Kate Perez|BOLD ID Engine Manual|BOLD:ACR1329  
Bryophaenocladus|BIOUG42942-C09|Kate Perez|BIN Taxonomy Match below Phylum (Jun 2019)|BOLD...  
Bryophaenocladus|CCDB24228-D06|Sofia Wiedenbrug|BIN Taxonomy Match|BOLD:ACR1329

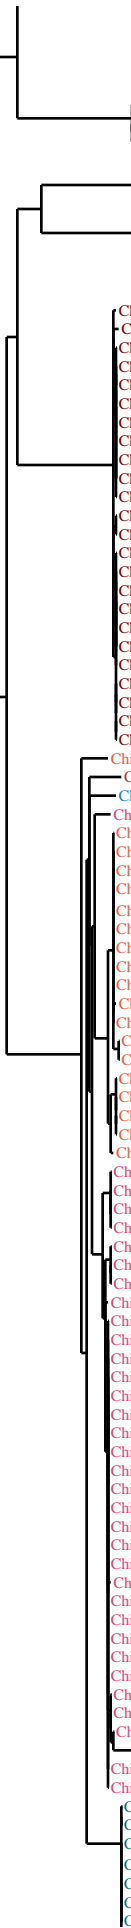

Bryophanoecoladius|BIOUG16709-B05|Kate Perez|BOLD ID Engine Manual|BOLD:ACR1329  
Bryophanoecoladius|BIOUG42942-C09|Kate Perez|BIN Taxonomy Match below Phylum (Jun 2019)|BOLD:ACR1329  
Bryophanoecoladius|CCDB24228-D06|Sofia Wiedenbrug|BIN Taxonomy Match|BOLD:ACR1329  
Bryophanoecoladius|BIOUG42930-E04|Kate Perez|BIN Taxonomy Match below Phylum (Jun 2019)|BOLD:ACR1329  
Bryophanoecoladius|BIOUG42938-F10|Kate Perez|BIN Taxonomy Match below Phylum (Jun 2019)|BOLD:ACR1329  
Bryophanoecoladius|BC-ZSM-DIP-22551-F10|Dieter Doczkal|BIN Taxonomy Match|BOLD:ACU4527  
Bryophanoecoladius|CCDB24038-G04|Jerome Moriniere|BIN Taxonomy Match|BOLD:ACU4527  
Bryophanoecoladius|BC-ZSM-DIP-22491-E03|Dieter Doczkal|BIN Taxonomy Match|BOLD:ACU4527  
Bryophanoecoladius|CCDB24228-E10|Sofia Wiedenbrug|BIN Taxonomy Match|BOLD:ACU4852  
Bryophanoecoladius|CCDB24228-D07|Sofia Wiedenbrug|BIN Taxonomy Match|BOLD:ACU4852  
Bryophanoecoladius|CCDB24228-D04|Sofia Wiedenbrug|BIN Taxonomy Match|BOLD:ACU4852  
Bryophanoecoladius|ZSM34343-D11|Sofia Wiedenbrug|Morphology|BOLD:ACU4086  
Bryophanoecoladius|ZSM34341-E11|Sofia Wiedenbrug|Morphology|BOLD:ACU4086  
Bryophanoecoladius|CCDB24228-D03|Sofia Wiedenbrug|BIN Taxonomy Match|BOLD:ACU4086  
Bryophanoecoladius|CCDB24228-C05|Sofia Wiedenbrug|BIN Taxonomy Match|BOLD:ACU4086  
Bryophanoecoladius|CCDB24228-C04|Sofia Wiedenbrug|BIN Taxonomy Match|BOLD:ACU4086  
Chironomidae|ZSM-DIP-33145-H11|Caroline Chimeno|BIN Taxonomy Match (Jan 2022)|BOLD:ACY8737  
Chironomidae|ZSM-DIP-33139-A12|Caroline Chimeno|BIN Taxonomy Match (Jan 2022)|BOLD:ACY8737  
Chironomidae|ZSM-DIP-33149-E08|Caroline Chimeno|BIN Taxonomy Match (Jan 2022)|BOLD:ACY8737  
Chironomidae|ZSM-DIP-33170-E08|Caroline Chimeno|BIN Taxonomy Match (Jan 2022)|BOLD:ACY8737  
Chironomidae|ZSM-DIP-33147-E06|Caroline Chimeno|BIN Taxonomy Match (Jan 2022)|BOLD:ACY8737  
Chironomidae|ZSM-DIP-33146-D01|Caroline Chimeno|BIN Taxonomy Match (Jan 2022)|BOLD:ACY8737  
Chironomidae|ZSM-DIP-33145-G04|Caroline Chimeno|BIN Taxonomy Match (Jan 2022)|BOLD:ACY8737  
Chironomidae|ZSM-DIP-33145-G03|Caroline Chimeno|BIN Taxonomy Match (Jan 2022)|BOLD:ACY8737  
Chironomidae|ZSM-DIP-33144-F04|Caroline Chimeno|BIN Taxonomy Match (Jan 2022)|BOLD:ACY8737  
Chironomidae|ZSM-DIP-33139-A11|Caroline Chimeno|BIN Taxonomy Match (Jan 2022)|BOLD:ACY8737  
Chironomidae|ZSM-DIP-33133-F05|Caroline Chimeno|BIN Taxonomy Match (Jan 2022)|BOLD:ACY8737  
Chironomidae|ZSM-DIP-33170-D08|Caroline Chimeno|BIN Taxonomy Match (Jan 2022)|BOLD:ACY8737  
Chironomidae|ZSM-DIP-33138-D04|Caroline Chimeno|BIN Taxonomy Match (Jan 2022)|BOLD:ACY8737  
Chironomidae|BIOUG55195-G04|Stefan Schmidt|BIN Taxonomy Match (Sep 2020)|BOLD:ACY8737  
Chironomidae|BIOUG42914-E06|Kate Perez|BIN Taxonomy Match below Phylum (Jun 2019)|BOLD:A...  
Chironomidae|BIOUG42723-C10|Kate Perez|BIN Taxonomy Match below Phylum (Jun 2019)|BOLD:A...  
Chironomidae|BIOUG42677-D09|Kate Perez|BIN Taxonomy Match below Phylum (Jun 2019)|BOLD:A...  
Chironomidae|BIOUG42670-E03|Kate Perez|BIN Taxonomy Match below Phylum (Jun 2019)|BOLD:A...  
Chironomidae|BIOUG42665-F01|Kate Perez|BIN Taxonomy Match below Phylum (Jun 2019)|BOLD:A...  
Chironomidae|BIOUG42764-E04|Kate Perez|BIN Taxonomy Match below Phylum (Jun 2019)|BOLD:A...  
Chironomidae|BIOUG42667-B06|Kate Perez|BIN Taxonomy Match below Phylum (Jun 2019)|BOLD:A...  
Chironomidae|BIOUG42759-D06|Kate Perez|BIN Taxonomy Match below Phylum (Jun 2019)|BOLD:A...  
Chironomidae|BIOUG42919-F02|Kate Perez|BIN Taxonomy Match below Phylum (Jun 2019)|BOLD:A...  
Chironomidae|BIOUG42918-F02|Kate Perez|BIN Taxonomy Match below Phylum (Jun 2019)|BOLD:A...  
Chironomidae|BIOUG37052-C09|Meredith Miller|Tree-based Identification (Jan 2019)|BOLD:AD...  
Chironomidae|BIOUG36761-E04|Meredith Miller|Tree-based Identification (Jan 2019)|BOLD:AD...  
Chironomidae|BIOUG16703-E02|Jerome Moriniere|BIN Taxonomy Match|BOLD:ACR1708  
Chironomidae|ZSM-DIP-33134-H07|Caroline Chimeno|BIN Taxonomy Match (Jan 2022)|BOLD:ACR0876  
Chironomidae|BIOUG36828-F02|Kate Perez|BIN Taxonomy Match (Jul 2018)|BOLD:ACQ8502  
Chironomidae|BIOUG36820-E10|Kate Perez|BIN Taxonomy Match (Jul 2018)|BOLD:ACQ8502  
Chironomidae|BIOUG36853-H11|Kate Perez|BIN Taxonomy Match (Jul 2018)|BOLD:ACQ8502  
Chironomidae|BIOUG36854-H09|Kate Perez|BIN Taxonomy Match (Jul 2018)|BOLD:ACQ8502  
Chironomidae|BIOUG36777-E06|Kate Perez|BIN Taxonomy Match (Jul 2018)|BOLD:ACQ8502  
Chironomidae|BIOUG36932-B01|Kate Perez|BIN Taxonomy Match (Jul 2018)|BOLD:ACQ8502  
Chironomidae|BIOUG36761-E03|Kate Perez|BIN Taxonomy Match (Jul 2018)|BOLD:ACQ8502  
Chironomidae|BIOUG36762-E10|Kate Perez|BIN Taxonomy Match (May 2018)|BOLD:ACQ8502  
Chironomidae|BIOUG36828-A05|Kate Perez|BIN Taxonomy Match (Jul 2018)|BOLD:ACQ8502  
Chironomidae|BIOUG36827-G05|Kate Perez|BIN Taxonomy Match (Jul 2018)|BOLD:ACQ8502  
Chironomidae|BIOUG36828-B11|Kate Perez|BIN Taxonomy Match (Jul 2018)|BOLD:ACQ8502  
Chironomidae|BIOUG16733-C11|Jerome Moriniere|BIN Taxonomy Match|BOLD:ACQ8502  
Chironomidae|BIOUG16709-C04|Jerome Moriniere|BIN Taxonomy Match|BOLD:ACQ8502  
Chironomidae|BIOUG43078-H09|Kate Perez|BIN Taxonomy Match below Phylum (Jun 2019)|BOLD:A...  
Chironomidae|BIOUG36761-G11|Kate Perez|BIN Taxonomy Match (Jul 2018)|BOLD:ACQ8502  
Chironomidae|BIOUG36845-F03|Kate Perez|BIN Taxonomy Match (Jul 2018)|BOLD:ACQ8502  
Chironomidae|BIOUG36828-E05|Kate Perez|BIN Taxonomy Match (Jul 2018)|BOLD:ACQ8502  
Chironomidae|BIOUG16270-H01|Jerome Moriniere|BIN Taxonomy Match|BOLD:ACQ8502  
Chironomidae|BIOUG17119-F11|Jerome Moriniere|BIN Taxonomy Match|BOLD:ACR0876  
Chironomidae|BIOUG16893-E03|Jerome Moriniere|BIN Taxonomy Match|BOLD:ACR0876  
Chironomidae|BIOUG16736-D07|Jerome Moriniere|BIN Taxonomy Match|BOLD:ACR0876  
Chironomidae|BIOUG16710-F11|Meredith Miller|Tree-based Identification (Feb 2019)|BOLD:AC...  
Chironomidae|BIOUG36762-G05|Kate Perez|BIN Taxonomy Match (May 2018)|BOLD:ACR0876  
Chironomidae|BIOUG36785-G03|Kate Perez|BIN Taxonomy Match (Jul 2018)|BOLD:ACR0876  
Chironomidae|BIOUG36828-C07|Kate Perez|BIN Taxonomy Match (Jul 2018)|BOLD:ACR0876  
Chironomidae|BIOUG37052-G05|Kate Perez|BIN Taxonomy Match (Jul 2018)|BOLD:ACR0876  
Chironomidae|BIOUG36854-B06|Kate Perez|BIN Taxonomy Match (Jul 2018)|BOLD:ACR0876  
Chironomidae|BIOUG16708-E06|Jerome Moriniere|BIN Taxonomy Match|BOLD:ACR0876  
Chironomidae|BIOUG16735-B11|Jerome Moriniere|BIN Taxonomy Match|BOLD:ACR0876  
Chironomidae|BIOUG16735-D04|Jerome Moriniere|BIN Taxonomy Match|BOLD:ACR0876  
Chironomidae|BIOUG42966-A03|Kate Perez|BIN Taxonomy Match below Phylum (Jun 2019)|BOLD:A...  
Chironomidae|ZSM-DIP-33133-B03|Caroline Chimeno|BIN Taxonomy Match (Jan 2022)|BOLD:ACR0876  
Chironomidae|ZSM-DIP-33134-H10|Caroline Chimeno|BIN Taxonomy Match (Jan 2022)|BOLD:ACR0876  
Chironomidae|ZSM-DIP-33129-C01|Caroline Chimeno|BIN Taxonomy Match (Jan 2022)|BOLD:ACR0876  
Chironomidae|BIOUG36787-H06|Kate Perez|BIN Taxonomy Match (Jul 2018)|BOLD:ACR0876  
Chironomidae|BIOUG36820-H10|Kate Perez|BIN Taxonomy Match (Jul 2018)|BOLD:ACR0876  
Chironomidae|BIOUG36786-A06|Kate Perez|BIN Taxonomy Match (Jul 2018)|BOLD:ACR0876  
Chironomidae|BIOUG36847-C04|Kate Perez|BIN Taxonomy Match (Jul 2018)|BOLD:ACR0876  
Chironomidae|BIOUG36853-F12|Kate Perez|BIN Taxonomy Match (Jul 2018)|BOLD:ACR0876  
Chironomidae|BIOUG36678-F08|Kate Perez|BIN Taxonomy Match (Jul 2018)|BOLD:ACR0876  
Chironomidae|BIOUG37052-B09|Kate Perez|BIN Taxonomy Match (Jul 2018)|BOLD:ACR0876  
Chironomidae|BIOUG16709-F09|Jerome Moriniere|BIN Taxonomy Match|BOLD:ACR0876  
Chironomidae|BIOUG36828-H03|Kate Perez|BIN Taxonomy Match (Jul 2018)|BOLD:ACR0876  
Chironomidae|BIOUG36820-B05|Kate Perez|BIN Taxonomy Match (Jul 2018)|BOLD:ACR0876  
Chironomidae|BIOUG36788-D01|Kate Perez|BIN Taxonomy Match (Jul 2018)|BOLD:ACR0876  
Chironomidae|BIOUG36846-A11|Kate Perez|BIN Taxonomy Match (Jul 2018)|BOLD:ACR0876  
Chironomidae|BIOUG36828-B05|Kate Perez|BIN Taxonomy Match (Jul 2018)|BOLD:ACR0876  
Chironomidae|BIOUG36679-G09|Kate Perez|BIN Taxonomy Match (Jul 2018)|BOLD:ACR0876  
Chironomidae|BIOUG36765-H05|Kate Perez|BIN Taxonomy Match (May 2018)|BOLD:ACR0876  
Chironomidae|BIOUG16708-A12|Kate Perez|Tree base identification  
Chironomidae|ZSM-DIP-33134-H05|Caroline Chimeno|BIN Taxonomy Match (Jan 2022)|BOLD:ACR0876  
Chironomidae|BIOUG16612-C03|Jerome Moriniere|BIN Taxonomy Match|BOLD:ACR0876  
Chironomidae|BIOUG36787-F10|Kate Perez|BIN Taxonomy Match (Jul 2018)|BOLD:ACR0361  
Chironomidae|BIOUG36786-E09|Kate Perez|BIN Taxonomy Match (Jul 2018)|BOLD:ACR0361  
Chironomidae|BIOUG17444-A11|Jerome Moriniere|BIN Taxonomy Match|BOLD:ACR0361  
Chironomidae|BIOUG17114-G06|Jerome Moriniere|BIN Taxonomy Match|BOLD:ACR0361  
Chironomidae|BIOUG36828-E07|Kate Perez|BIN Taxonomy Match (Jul 2018)|BOLD:ACR0361  
Chironomidae|BIOUG16733-D08|Jerome Moriniere|BIN Taxonomy Match|BOLD:ACR0361  
Chironomidae|BIOUG16529-B09|Jerome Moriniere|BIN Taxonomy Match|BOLD:ACR0361

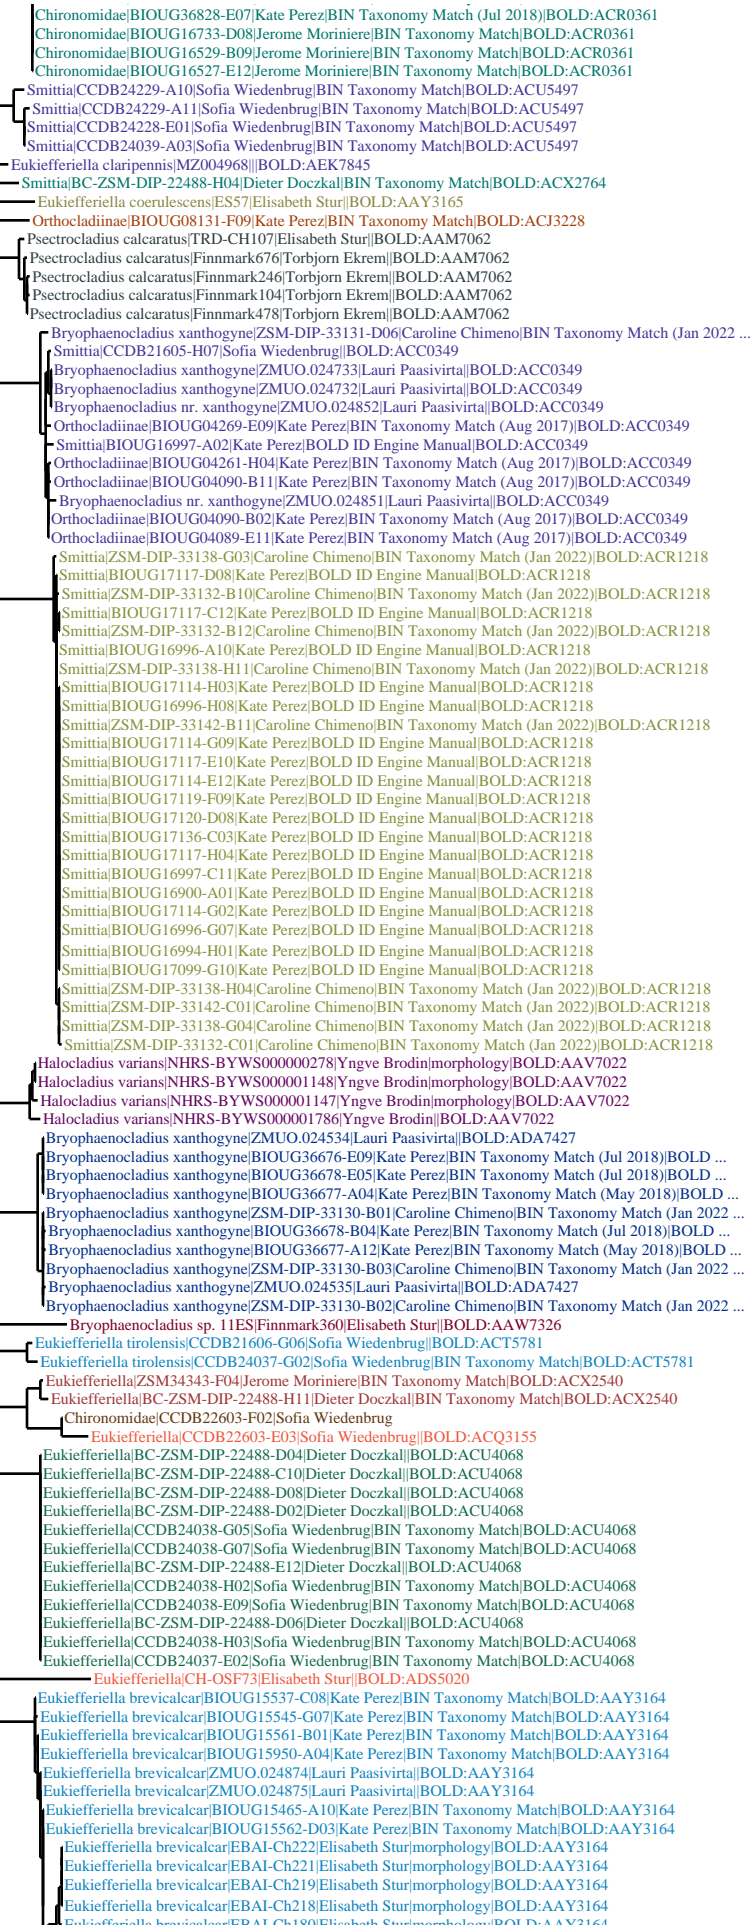



Eukiefferiella brevicar|EBAI-Ch219|Elisabeth Stur|morphology|BOLD:AA3164  
 Eukiefferiella brevicar|EBAI-Ch218|Elisabeth Stur|morphology|BOLD:AA3164  
 Eukiefferiella brevicar|EBAI-Ch180|Elisabeth Stur|morphology|BOLD:AA3164  
 Eukiefferiella brevicar|Finmark896|G. A. Halvorsen|BOLD:AA3164  
 Eukiefferiella brevicar|ATNA222|Elisabeth Stur|BOLD:AA3164  
 Eukiefferiella brevicar|CH-OSF12|Elisabeth Stur|BOLD:AA3164  
 Eukiefferiella brevicar|Finmark643|Elisabeth Stur|BOLD:AA3164  
 Chironomidae|BIOUG17120-A04|Jerome Moriniere|BIN Taxonomy Match|BOLD:ACR3254  
 Chironomidae|BIOUG17380-C10|Jerome Moriniere|BIN Taxonomy Match|BOLD:ACR2744  
 Chironomidae|BIOUG17379-G12|Jerome Moriniere|BIN Taxonomy Match|BOLD:ACR2744  
 Chironomidae|BIOUG17303-C03|Jerome Moriniere|BIN Taxonomy Match|BOLD:ACR2744  
 Chironomidae|BIOUG55144-A07|Kate Perez|BIN Taxonomy Match (Oct 2020)|BOLD:ACR2744  
 Chironomidae|BIOUG17376-E09|Jerome Moriniere|BIN Taxonomy Match|BOLD:ACR2744  
 Chironomidae|BIOUG17178-B06|Jerome Moriniere|BIN Taxonomy Match|BOLD:ACR2744  
 Chironomidae|BIOUG17137-G12|Jerome Moriniere|BIN Taxonomy Match|BOLD:ACR2744  
 Chironomidae|BIOUG17437-A10|Jerome Moriniere|BIN Taxonomy Match|BOLD:ACR2744  
 Chironomidae|BIOUG17380-E07|Jerome Moriniere|BIN Taxonomy Match|BOLD:ACR2744  
 Bryophaenocladus|BIOUG42731-H11|Kate Perez|BIN Taxonomy Match below Phylum (Jun 2019)|BOLD...  
 Bryophaenocladus|BIOUG42689-B10|Kate Perez|BIN Taxonomy Match below Phylum (Jun 2019)|BOLD...  
 Bryophaenocladus|BIOUG42685-D09|Kate Perez|BIN Taxonomy Match below Phylum (Jun 2019)|BOLD...  
 Bryophaenocladus|TRD-CH196|Elisabeth Stur|BOLD:ACT7634  
 Bryophaenocladus|ZMUO.024961|Lauri Paasivirta|BOLD:ACT7634  
 Bryophaenocladus|BIOUG55195-D11|Stefan Schmidt|BIN Taxonomy Match (Sep 2020)|BOLD:ACT7634  
 Bryophaenocladus|ZMUO.025293|Lauri Paasivirta|BOLD:ACT7634  
 Bryophaenocladus|ZMUO.025292|Lauri Paasivirta|BOLD:ACT7634  
 Bryophaenocladus|ZMUO.025176|Lauri Paasivirta|BOLD:ACT7634  
 Bryophaenocladus|BIOUG42679-H09|Kate Perez|BIN Taxonomy Match below Phylum (Jun 2019)|BOLD...  
 Bryophaenocladus|BIOUG42687-D08|Kate Perez|BIN Taxonomy Match below Phylum (Jun 2019)|BOLD...  
 Bryophaenocladus|ZMUO.025177|Lauri Paasivirta|BOLD:ACT7634  
 Bryophaenocladus|BIOUG36680-H03|Kate Perez|BIN Taxonomy Match (May 2018)|BOLD:ACT7634  
 Bryophaenocladus|BIOUG42713-C02|Kate Perez|BIN Taxonomy Match below Phylum (Jun 2019)|BOLD...  
 Bryophaenocladus|BIOUG42923-B06|Kate Perez|BIN Taxonomy Match below Phylum (Jun 2019)|BOLD...  
 Bryophaenocladus|BIOUG42920-D04|Kate Perez|BIN Taxonomy Match below Phylum (Jun 2019)|BOLD...  
 Chironomidae|ZSM-DIP-33145-D07|Valerie Levesque-Beaudin|BIN Taxonomy Match (Sep 2021)|BOLD...  
 Chironomidae|ZSM-DIP-33170-A12|Valerie Levesque-Beaudin|BIN Taxonomy Match (Sep 2021)|BOLD...  
 Chironomidae|ZSM-DIP-33149-D05|Valerie Levesque-Beaudin|BIN Taxonomy Match (Sep 2021)|BOLD...  
 Chironomidae|ZSM-DIP-33149-D10|Valerie Levesque-Beaudin|BIN Taxonomy Match (Sep 2021)|BOLD...  
 Chironomidae|ZSM-DIP-33130-F04|Valerie Levesque-Beaudin|BIN Taxonomy Match (Sep 2021)|BOLD...  
 Chironomidae|ZSM-DIP-33141-E05|Valerie Levesque-Beaudin|BIN Taxonomy Match (Sep 2021)|BOLD...  
 Chironomidae|ZSM-DIP-33141-E04|Valerie Levesque-Beaudin|BIN Taxonomy Match (Sep 2021)|BOLD...  
 Chironomidae|ZSM-DIP-33144-B01|Valerie Levesque-Beaudin|BIN Taxonomy Match (Sep 2021)|BOLD...  
 Chironomidae|ZSM-DIP-33145-D06|Valerie Levesque-Beaudin|BIN Taxonomy Match (Sep 2021)|BOLD...  
 Chironomidae|ZSM-DIP-33145-D10|Valerie Levesque-Beaudin|BIN Taxonomy Match (Sep 2021)|BOLD...  
 Chironomidae|ZSM-DIP-33141-E10|Valerie Levesque-Beaudin|BIN Taxonomy Match (Sep 2021)|BOLD...  
 Chironomidae|ZSM-DIP-33130-F03|Valerie Levesque-Beaudin|BIN Taxonomy Match (Sep 2021)|BOLD...  
 Chironomidae|ZSM-DIP-33170-B02|Valerie Levesque-Beaudin|BIN Taxonomy Match (Sep 2021)|BOLD...  
 Chironomidae|ZSM-DIP-33149-D07|Valerie Levesque-Beaudin|BIN Taxonomy Match (Sep 2021)|BOLD...  
 Chironomidae|ZSM-DIP-33149-C12|Valerie Levesque-Beaudin|BIN Taxonomy Match (Sep 2021)|BOLD...  
 Chironomidae|ZSM-DIP-33145-E01|Valerie Levesque-Beaudin|BIN Taxonomy Match (Sep 2021)|BOLD...  
 Chironomidae|ZSM-DIP-33145-E02|Valerie Levesque-Beaudin|BIN Taxonomy Match (Sep 2021)|BOLD...  
 Chironomidae|ZSM-DIP-33149-D08|Valerie Levesque-Beaudin|BIN Taxonomy Match (Sep 2021)|BOLD...  
 Chironomidae|ZSM-DIP-33141-E12|Valerie Levesque-Beaudin|BIN Taxonomy Match (Sep 2021)|BOLD...  
 Chironomidae|ZSM-DIP-33149-D04|Valerie Levesque-Beaudin|BIN Taxonomy Match (Sep 2021)|BOLD...  
 Chironomidae|ZSM-DIP-33144-A11|Valerie Levesque-Beaudin|BIN Taxonomy Match (Sep 2021)|BOLD...  
 Chironomidae|ZSM-DIP-33149-D11|Valerie Levesque-Beaudin|BIN Taxonomy Match (Sep 2021)|BOLD...  
 Chironomidae|ZSM-DIP-33143-G11|Valerie Levesque-Beaudin|BIN Taxonomy Match (Sep 2021)|BOLD...  
 Chironomidae|ZSM-DIP-33145-D12|Valerie Levesque-Beaudin|BIN Taxonomy Match (Sep 2021)|BOLD...  
 Chironomidae|ZSM-DIP-33145-D08|Valerie Levesque-Beaudin|BIN Taxonomy Match (Sep 2021)|BOLD...  
 Chironomidae|ZSM-DIP-33135-G11|Valerie Levesque-Beaudin|BIN Taxonomy Match (Sep 2021)|BOLD...  
 Chironomidae|ZSM-DIP-33144-B08|Valerie Levesque-Beaudin|BIN Taxonomy Match (Sep 2021)|BOLD...  
 Chironomidae|ZSM-DIP-33149-C11|Valerie Levesque-Beaudin|BIN Taxonomy Match (Sep 2021)|BOLD...  
 Chironomidae|ZSM-DIP-33145-D11|Valerie Levesque-Beaudin|BIN Taxonomy Match (Sep 2021)|BOLD...  
 Chironomidae|ZSM-DIP-33130-G09|Valerie Levesque-Beaudin|BIN Taxonomy Match (Sep 2021)|BOLD...  
 Chironomidae|ZSM-DIP-33144-B02|Valerie Levesque-Beaudin|BIN Taxonomy Match (Sep 2021)|BOLD...  
 Chironomidae|ZSM-DIP-33170-B01|Valerie Levesque-Beaudin|BIN Taxonomy Match (Sep 2021)|BOLD...  
 Chironomidae|ZSM-DIP-33134-B08|Valerie Levesque-Beaudin|BIN Taxonomy Match (Sep 2021)|BOLD...  
 Chironomidae|ZSM-DIP-33149-D06|Valerie Levesque-Beaudin|BIN Taxonomy Match (Sep 2021)|BOLD...  
 Chironomidae|ZSM-DIP-33144-B09|Valerie Levesque-Beaudin|BIN Taxonomy Match (Sep 2021)|BOLD...  
 Chironomidae|ZSM-DIP-33134-B06|Valerie Levesque-Beaudin|BIN Taxonomy Match (Sep 2021)|BOLD...  
 Chironomidae|ZSM-DIP-33129-C09|Caroline Chimeno|BIN Taxonomy Match (Jan 2022)|BOLD:ACR3766  
 Chironomidae|ZSM-DIP-33136-H03|Caroline Chimeno|BIN Taxonomy Match (Jan 2022)|BOLD:ACR3766  
 Orthoclaadiinae|MEBFL12|BOLD ID Engine|BOLD:ACR3766  
 Chironomidae|BIOUG16705-A09|Jerome Moriniere|BIN Taxonomy Match|BOLD:ACR3766  
 Chironomidae|BIOUG16705-C10|Jerome Moriniere|BIN Taxonomy Match|BOLD:ACR3766  
 Chironomidae|BIOUG16705-G11|Jerome Moriniere|BIN Taxonomy Match|BOLD:ACR3766  
 Chironomidae|BIOUG16706-C10|Jerome Moriniere|BIN Taxonomy Match|BOLD:ACR3766  
 Chironomidae|BIOUG16734-C10|Jerome Moriniere|BIN Taxonomy Match|BOLD:ACR3766  
 Chironomidae|BIOUG16735-A11|Jerome Moriniere|BIN Taxonomy Match|BOLD:ACR3766  
 Chironomidae|BIOUG17376-E07|Jerome Moriniere|BIN Taxonomy Match|BOLD:ACR3766  
 Chironomidae|BIOUG17376-B10|Jerome Moriniere|BIN Taxonomy Match|BOLD:ACR3766  
 Chironomidae|BIOUG16710-H02|Jerome Moriniere|BIN Taxonomy Match|BOLD:ACR3766  
 Chironomidae|BIOUG16709-H07|Jerome Moriniere|BIN Taxonomy Match|BOLD:ACR3766  
 Chironomidae|BIOUG16705-H08|Jerome Moriniere|BIN Taxonomy Match|BOLD:ACR3766  
 Chironomidae|BIOUG17444-F06|Jerome Moriniere|BIN Taxonomy Match|BOLD:ACR3766  
 Bryophaenocladus propinquus|ZSM-DIP-33146-F10|Caroline Chimeno|BIN Taxonomy Match (Jan 2022 ...  
 Bryophaenocladus propinquus|ZSM-DIP-33137-F04|Caroline Chimeno|BIN Taxonomy Match (Jan 2022 ...  
 Bryophaenocladus propinquus|NHRS-BYWS00000334|Yngve Brodin|morphology|BOLD:ADF0610  
 Bryophaenocladus propinquus|ZSM-DIP-33130-A05|Caroline Chimeno|BIN Taxonomy Match (Jan 2022 ...  
 Bryophaenocladus propinquus|NHRS-BYWS00000924|Yngve Brodin|morphology|BOLD:ADF0610  
 Bryophaenocladus|ZMUO.026223|Lauri Paasivirta|BOLD:ADF0610  
 Bryophaenocladus|ZMUO.026224|Lauri Paasivirta|BOLD:ADF0610  
 Bryophaenocladus propinquus|ZSM-DIP-33137-F05|Caroline Chimeno|BIN Taxonomy Match (Jan 2022 ...  
 Bryophaenocladus propinquus|ZSM-DIP-33141-F06|Caroline Chimeno|BIN Taxonomy Match (Jan 2022 ...  
 Bryophaenocladus propinquus|ZSM-DIP-33142-D05|Caroline Chimeno|BIN Taxonomy Match (Jan 2022 ...  
 Bryophaenocladus propinquus|ZSM-DIP-33137-F01|Caroline Chimeno|BIN Taxonomy Match (Jan 2022 ...  
 Bryophaenocladus propinquus|ZSM-DIP-33137-F03|Caroline Chimeno|BIN Taxonomy Match (Jan 2022 ...  
 Bryophaenocladus propinquus|ZSM-DIP-33146-F09|Caroline Chimeno|BIN Taxonomy Match (Jan 2022 ...  
 Bryophaenocladus propinquus|BIOUG36931-G05|Kate Perez|BIN Taxonomy Match (May 2018)|BOLD...  
 Bryophaenocladus propinquus|BIOUG36987-B03|Kate Perez|BIN Taxonomy Match (Jul 2018)|BOLD...  
 Bryophaenocladus propinquus|ZSM-DIP-33131-E04|Caroline Chimeno|BIN Taxonomy Match (Jan 2022 ...  
 Bryophaenocladus propinquus|ZSM-DIP-33134-H08|Caroline Chimeno|BIN Taxonomy Match (Jan 2022 ...  
 Bryophaenocladus propinquus|ZSM-DIP-33134-H04|Caroline Chimeno|BIN Taxonomy Match (Jan 2022 ...

Bryophaeoeladus propinquus[ZSM-DIP-33134-H04]Caroline Chimenò|BIN Taxonomy Match (Jan 2022)...  
Bryophaeoeladus propinquus[ZSM-DIP-33134-H08]Caroline Chimenò|BIN Taxonomy Match (Jan 2022)...  
Bryophaeoeladus propinquus[ZSM-DIP-33134-H04]Caroline Chimenò|BIN Taxonomy Match (Jan 2022)...  
Bryophaeoeladus sp. 3ES|Finmark64|Elisabeth Sturj|BOLD: AAM7074  
Bryophaeoeladus[CCDB24039-H05]Sofia Wiedenbrug|BIN Taxonomy Match|BOLD: ACU5428  
Bryophaeoeladus[CCDB24039-H04]Sofia Wiedenbrug|BIN Taxonomy Match|BOLD: ACU5428  
Bryophaeoeladus cf. akiensis[ZSM-DIP-33142-A12]Caroline Chimenò|BIN Taxonomy Match (Jan 2022)...  
Bryophaeoeladus cf. akiensis|BIOUG17305-D01|Sofia Wiedenbrug|BIN Taxonomy Match|BOLD: ACR3672  
Bryophaeoeladus cf. akiensis|BIOUG17224-F09|Sofia Wiedenbrug|BIN Taxonomy Match|BOLD: ACR3672  
Bryophaeoeladus cf. akiensis|ZSM34341-B10|Sofia Wiedenbrug|BIN Taxonomy Match|BOLD: ACR3672  
Bryophaeoeladus cf. akiensis|ZSM34341-B07|Sofia Wiedenbrug|Morphology|BOLD: ACR3672  
Bryophaeoeladus cf. akiensis|ZSM34341-C02|Sofia Wiedenbrug|BIN Taxonomy Match|BOLD: ACR3672  
Bryophaeoeladus cf. akiensis|BIOUG17303-E03|Sofia Wiedenbrug|BIN Taxonomy Match|BOLD: ACR3672  
Bryophaeoeladus cf. akiensis|ZSM34341-C07|Sofia Wiedenbrug|BIN Taxonomy Match|BOLD: ACR3672  
Bryophaeoeladus cf. akiensis|ZSM34341-B11|Sofia Wiedenbrug|BIN Taxonomy Match|BOLD: ACR3672  
Bryophaeoeladus cf. akiensis|ZSM-DIP-33142-B03|Caroline Chimenò|BIN Taxonomy Match (Jan 2022)...  
Bryophaeoeladus cf. akiensis|ZSM34341-B09|Sofia Wiedenbrug|BIN Taxonomy Match|BOLD: ACR3672  
Bryophaeoeladus cf. akiensis|ZSM34341-C08|Sofia Wiedenbrug|BIN Taxonomy Match|BOLD: ACR3672  
Bryophaeoeladus cf. akiensis|ZSM34341-B06|Sofia Wiedenbrug|Morphology|BOLD: ACR3672  
Bryophaeoeladus cf. akiensis|ZSM34341-C04|Sofia Wiedenbrug|Morphology|BOLD: ACR3672  
Bryophaeoeladus cf. akiensis|ZSM34341-B04|Sofia Wiedenbrug|Morphology|BOLD: ACR3672  
Bryophaeoeladus cf. akiensis|ZSM34341-B08|Sofia Wiedenbrug|BIN Taxonomy Match|BOLD: ACR3672  
Bryophaeoeladus cf. akiensis|CCDB24228-D01|Sofia Wiedenbrug|BIN Taxonomy Match|BOLD: ACR3672  
Bryophaeoeladus aestivus[ZMUO.024578]Lauri Paasivirta|BOLD: AAZ9340  
Bryophaeoeladus aestivus[ZMUO.024579]Lauri Paasivirta|BOLD: AAZ9340  
Bryophaeoeladus aestivus|BIOUG37182-E08|Kate Perez|BIN Taxonomy Match (Jul 2018)|BOLD:...  
Bryophaeoeladus aestivus|BIOUG36762-G12|Kate Perez|BIN Taxonomy Match (May 2018)|BOLD:...  
Bryophaeoeladus aestivus|BIOUG36845-G03|Kate Perez|BIN Taxonomy Match (Jul 2018)|BOLD:...  
Bryophaeoeladus aestivus|BIOUG16736-E10|Kate Perez|BIN Taxonomy Match|BOLD: AAZ9340  
Bryophaeoeladus aestivus|CH-OSF158|Elisabeth Sturj|BOLD: AAZ9340  
Bryophaeoeladus aestivus|CH-OSF157|Elisabeth Sturj|BOLD: AAZ9340  
Chironomidae|BIOUG36725-D04|Kate Perez|BIN Taxonomy Match (Jan 2019)|BOLD: ADM2958  
Chironomidae|BIOUG36724-F05|Meredith Miller|Tree-based Identification (Jan 2019)|BOLD: AD...  
Chironomidae|ZSM-DIP-33138-A05|Caroline Chimenò|BIN Taxonomy Match (Jan 2022)|BOLD: ADM2958  
Bryophaeoeladus[ZSM-DIP-33138-F11]Caroline Chimenò|BIN Taxonomy Match (Jan 2022)|BOLD:...  
Bryophaeoeladus[ZSM-DIP-33138-B08]Caroline Chimenò|BIN Taxonomy Match (Jan 2022)|BOLD:...  
Bryophaeoeladus[ZSM-DIP-33129-B10]Caroline Chimenò|BIN Taxonomy Match (Jan 2022)|BOLD:...  
Bryophaeoeladus[ZSM-DIP-33138-B04]Caroline Chimenò|BIN Taxonomy Match (Jan 2022)|BOLD:...  
Bryophaeoeladus[ZSM-DIP-33138-B06]Caroline Chimenò|BIN Taxonomy Match (Jan 2022)|BOLD:...  
Bryophaeoeladus[ZSM-DIP-33138-A06]Caroline Chimenò|BIN Taxonomy Match (Jan 2022)|BOLD:...  
Bryophaeoeladus|BIOUG16997-B01|Kate Perez|BOLD ID Engine Manual|BOLD: ACR3707  
Bryophaeoeladus sp. 4ES|CH-eik38|Elisabeth Sturj|BOLD: AAW1343  
Bryophaeoeladus|BIOUG42673-C12|Kate Perez|BIN Taxonomy Match below Phylum (Jun 2019)|BOLD:...  
Bryophaeoeladus[ZSM-DIP-33138-D11]Caroline Chimenò|BIN Taxonomy Match (Jan 2022)|BOLD:...  
Bryophaeoeladus[ZSM-DIP-33140-G12]Caroline Chimenò|BIN Taxonomy Match (Jan 2022)|BOLD:...  
Bryophaeoeladus sp. 4ES|BIOUG16734-H04|Kate Perez|BIN Taxonomy Match|BOLD: AAW1343  
Bryophaeoeladus sp. 4ES|BIOUG17303-G08|Kate Perez|BIN Taxonomy Match|BOLD: AAW1343  
Bryophaeoeladus sp. 4ES|BIOUG16736-B02|Kate Perez|BIN Taxonomy Match|BOLD: AAW1343  
Bryophaeoeladus sp. 4ES|BIOUG16706-A08|Kate Perez|BIN Taxonomy Match|BOLD: AAW1343  
Bryophaeoeladus|BIOUG55421-D03|Stefan Schmidt|BIN Taxonomy Match (Sep 2020)|BOLD: AAW1343  
Bryophaeoeladus|BIOUG42948-E05|Kate Perez|BIN Taxonomy Match below Phylum (Jun 2019)|BOLD:...  
Bryophaeoeladus|BIOUG42948-E01|Kate Perez|BIN Taxonomy Match below Phylum (Jun 2019)|BOLD:...  
Bryophaeoeladus[ZSM-DIP-33133-G08]Caroline Chimenò|BIN Taxonomy Match (Jan 2022)|BOLD:...  
Bryophaeoeladus[ZSM-DIP-33142-H01]Caroline Chimenò|BIN Taxonomy Match (Jan 2022)|BOLD:...  
Bryophaeoeladus[ZSM-DIP-33137-H02]Caroline Chimenò|BIN Taxonomy Match (Jan 2022)|BOLD:...  
Bryophaeoeladus[ZSM-DIP-33144-F05]Caroline Chimenò|BIN Taxonomy Match (Jan 2022)|BOLD:...  
Bryophaeoeladus sp. 4ES|ZSM-DIP-33138-D02|Caroline Chimenò|BIN Taxonomy Match (Jan 2022)|...  
Bryophaeoeladus[ZSM-DIP-33142-H04]Caroline Chimenò|BIN Taxonomy Match (Jan 2022)|BOLD:...  
Bryophaeoeladus|BIOUG42948-F03|Kate Perez|BIN Taxonomy Match below Phylum (Jun 2019)|BOLD:...  
Bryophaeoeladus[ZSM-DIP-33149-F03]Caroline Chimenò|BIN Taxonomy Match (Jan 2022)|BOLD:...  
Bryophaeoeladus[ZSM-DIP-33136-G11]Caroline Chimenò|BIN Taxonomy Match (Jan 2022)|BOLD:...  
Bryophaeoeladus[ZSM-DIP-33138-E04]Caroline Chimenò|BIN Taxonomy Match (Jan 2022)|BOLD:...  
Bryophaeoeladus[ZSM-DIP-33138-E06]Caroline Chimenò|BIN Taxonomy Match (Jan 2022)|BOLD:...  
Bryophaeoeladus[ZSM-DIP-33140-G04]Caroline Chimenò|BIN Taxonomy Match (Jan 2022)|BOLD:...  
Bryophaeoeladus[ZSM-DIP-33145-G06]Caroline Chimenò|BIN Taxonomy Match (Jan 2022)|BOLD:...  
Bryophaeoeladus[ZSM-DIP-33145-H03]Caroline Chimenò|BIN Taxonomy Match (Jan 2022)|BOLD:...  
Bryophaeoeladus[ZSM-DIP-33147-G02]Caroline Chimenò|BIN Taxonomy Match (Jan 2022)|BOLD:...  
Bryophaeoeladus[ZSM-DIP-33147-D01]Caroline Chimenò|BIN Taxonomy Match (Jan 2022)|BOLD:...  
Bryophaeoeladus[ZSM-DIP-33140-H01]Caroline Chimenò|BIN Taxonomy Match (Jan 2022)|BOLD:...  
Bryophaeoeladus[ZSM-DIP-33140-G05]Caroline Chimenò|BIN Taxonomy Match (Jan 2022)|BOLD:...  
Bryophaeoeladus[ZSM-DIP-33140-G03]Caroline Chimenò|BIN Taxonomy Match (Jan 2022)|BOLD:...  
Bryophaeoeladus[ZSM-DIP-33140-G07]Caroline Chimenò|BIN Taxonomy Match (Jan 2022)|BOLD:...  
Bryophaeoeladus[ZSM-DIP-33140-G06]Caroline Chimenò|BIN Taxonomy Match (Jan 2022)|BOLD:...  
Bryophaeoeladus[ZSM-DIP-33140-G02]Caroline Chimenò|BIN Taxonomy Match (Jan 2022)|BOLD:...  
Bryophaeoeladus[ZSM-DIP-33140-G01]Caroline Chimenò|BIN Taxonomy Match (Jan 2022)|BOLD:...  
Bryophaeoeladus[ZSM-DIP-33140-F12]Caroline Chimenò|BIN Taxonomy Match (Jan 2022)|BOLD:...  
Bryophaeoeladus[ZSM-DIP-33140-F10]Caroline Chimenò|BIN Taxonomy Match (Jan 2022)|BOLD:...  
Bryophaeoeladus sp. 4ES|ZSM-DIP-33139-B12|Caroline Chimenò|BIN Taxonomy Match (Jan 2022)|...  
Bryophaeoeladus[ZSM-DIP-33139-B08]Caroline Chimenò|BIN Taxonomy Match (Jan 2022)|BOLD:...  
Bryophaeoeladus[ZSM-DIP-33139-B07]Caroline Chimenò|BIN Taxonomy Match (Jan 2022)|BOLD:...  
Bryophaeoeladus[ZSM-DIP-33138-D12]Caroline Chimenò|BIN Taxonomy Match (Jan 2022)|BOLD:...  
Bryophaeoeladus[ZSM-DIP-33138-D01]Caroline Chimenò|BIN Taxonomy Match (Jan 2022)|BOLD:...  
Bryophaeoeladus[ZSM-DIP-33136-H01]Caroline Chimenò|BIN Taxonomy Match (Jan 2022)|BOLD:...  
Bryophaeoeladus[ZSM-DIP-33136-G06]Caroline Chimenò|BIN Taxonomy Match (Jan 2022)|BOLD:...  
Bryophaeoeladus[ZSM-DIP-33135-B08]Caroline Chimenò|BIN Taxonomy Match (Jan 2022)|BOLD:...  
Bryophaeoeladus[ZSM-DIP-33135-A11]Caroline Chimenò|BIN Taxonomy Match (Jan 2022)|BOLD:...  
Bryophaeoeladus[ZSM-DIP-33135-A10]Caroline Chimenò|BIN Taxonomy Match (Jan 2022)|BOLD:...  
Bryophaeoeladus[ZSM-DIP-33142-H05]Caroline Chimenò|BIN Taxonomy Match (Jan 2022)|BOLD:...  
Bryophaeoeladus[ZSM-DIP-33142-G12]Caroline Chimenò|BIN Taxonomy Match (Jan 2022)|BOLD:...  
Bryophaeoeladus[ZSM-DIP-33142-G11]Caroline Chimenò|BIN Taxonomy Match (Jan 2022)|BOLD:...  
Bryophaeoeladus[ZSM-DIP-33133-G09]Caroline Chimenò|BIN Taxonomy Match (Jan 2022)|BOLD:...  
Bryophaeoeladus[ZSM-DIP-33133-C03]Caroline Chimenò|BIN Taxonomy Match (Jan 2022)|BOLD:...  
Bryophaeoeladus[ZSM-DIP-33133-B01]Caroline Chimenò|BIN Taxonomy Match (Jan 2022)|BOLD:...  
Bryophaeoeladus sp. 4ES|ZSM-DIP-33138-D09|Caroline Chimenò|BIN Taxonomy Match (Jan 2022)|...  
Bryophaeoeladus[ZSM-DIP-33137-H06]Caroline Chimenò|BIN Taxonomy Match (Jan 2022)|BOLD:...  
Bryophaeoeladus[ZSM-DIP-33135-B03]Caroline Chimenò|BIN Taxonomy Match (Jan 2022)|BOLD:...  
Bryophaeoeladus[ZSM-DIP-33135-A12]Caroline Chimenò|BIN Taxonomy Match (Jan 2022)|BOLD:...  
Bryophaeoeladus[ZSM-DIP-33140-H02]Caroline Chimenò|BIN Taxonomy Match (Jan 2022)|BOLD:...  
Bryophaeoeladus[ZSM-DIP-33140-G11]Caroline Chimenò|BIN Taxonomy Match (Jan 2022)|BOLD:...  
Bryophaeoeladus[ZSM-DIP-33140-G09]Caroline Chimenò|BIN Taxonomy Match (Jan 2022)|BOLD:...  
Bryophaeoeladus[ZSM-DIP-33140-G08]Caroline Chimenò|BIN Taxonomy Match (Jan 2022)|BOLD:...  
Bryophaeoeladus[ZSM-DIP-33128-B09]Caroline Chimenò|BIN Taxonomy Match (Jan 2022)|BOLD:...  
Bryophaeoeladus[ZSM-DIP-33128-B08]Caroline Chimenò|BIN Taxonomy Match (Jan 2022)|BOLD:...

Bryophaeocladius|ZSM-DIP-33140-G08|Caroline Chimen|BIN Taxonomy Match (Jan 2022)|BOLD:...

Bryophaeocladius|ZSM-DIP-33128-B09|Caroline Chimen|BIN Taxonomy Match (Jan 2022)|BOLD:...

Bryophaeocladius|ZSM-DIP-33128-B08|Caroline Chimen|BIN Taxonomy Match (Jan 2022)|BOLD:...

Bryophaeocladius|ZSM-DIP-33144-H08|Caroline Chimen|BIN Taxonomy Match (Jan 2022)|BOLD:...

Bryophaeocladius|ZSM-DIP-33128-B10|Caroline Chimen|BIN Taxonomy Match (Jan 2022)|BOLD:...

Bryophaeocladius|ZSM-DIP-33145-H02|Caroline Chimen|BIN Taxonomy Match (Jan 2022)|BOLD:...

Bryophaeocladius|ZSM-DIP-33145-G02|Caroline Chimen|BIN Taxonomy Match (Jan 2022)|BOLD:...

Bryophaeocladius|ZSM-DIP-33147-D03|Caroline Chimen|BIN Taxonomy Match (Jan 2022)|BOLD:...

Bryophaeocladius|ZSM-DIP-33145-H04|Caroline Chimen|BIN Taxonomy Match (Jan 2022)|BOLD:...

Bryophaeocladius|ZSM-DIP-33147-G01|Caroline Chimen|BIN Taxonomy Match (Jan 2022)|BOLD:...

Bryophaeocladius|ZSM-DIP-33147-F10|Caroline Chimen|BIN Taxonomy Match (Jan 2022)|BOLD:...

Bryophaeocladius|ZSM-DIP-33149-E12|Caroline Chimen|BIN Taxonomy Match (Jan 2022)|BOLD:...

Bryophaeocladius|ZSM-DIP-33149-F02|Caroline Chimen|BIN Taxonomy Match (Jan 2022)|BOLD:...

Bryophaeocladius|ZSM-DIP-33170-D06|Caroline Chimen|BIN Taxonomy Match (Jan 2022)|BOLD:...

Bryophaeocladius|ZSM-DIP-33170-D07|Caroline Chimen|BIN Taxonomy Match (Jan 2022)|BOLD:...

Bryophaeocladius|ZSM-DIP-33170-D12|Caroline Chimen|BIN Taxonomy Match (Jan 2022)|BOLD:...

Bryophaeocladius|ZSM-DIP-33170-E02|Caroline Chimen|BIN Taxonomy Match (Jan 2022)|BOLD:...

Bryophaeocladius|ZSM-DIP-33170-E03|Caroline Chimen|BIN Taxonomy Match (Jan 2022)|BOLD:...

Bryophaeocladius|ZSM-DIP-33170-E04|Caroline Chimen|BIN Taxonomy Match (Jan 2022)|BOLD:...

Bryophaeocladius|BIOUG42744-A05|Kate Perez|BIN Taxonomy Match below Phylum (Jun 2019)|BOLD:...

Bryophaeocladius|ZSM-DIP-33138-E02|Caroline Chimen|BIN Taxonomy Match (Jan 2022)|BOLD:...

Bryophaeocladius|BIOUG42927-F05|Kate Perez|BIN Taxonomy Match below Phylum (Jun 2019)|BOLD:...

Bryophaeocladius sp. 4ES|BIOUG36788-E11|Kate Perez|BIN Taxonomy Match (Jan 2019)|BOLD:A...

Bryophaeocladius sp. 4ES|BIOUG36932-A09|Kate Perez|BIN Taxonomy Match (Jan 2019)|BOLD:A...

Bryophaeocladius sp. 4ES|BIOUG36653-F06|Kate Perez|BIN Taxonomy Match (Jan 2019)|BOLD:A...

Bryophaeocladius sp. 4ES|BIOUG36785-C01|Kate Perez|BIN Taxonomy Match (Jan 2019)|BOLD:A...

Bryophaeocladius sp. 4ES|BIOUG36854-E01|Kate Perez|BIN Taxonomy Match (Jan 2019)|BOLD:A...

Bryophaeocladius sp. 4ES|BIOUG37052-D02|Kate Perez|BIN Taxonomy Match (Jan 2019)|BOLD:A...

Bryophaeocladius sp. 4ES|BIOUG37052-D03|Kate Perez|BIN Taxonomy Match (Jan 2019)|BOLD:A...

Bryophaeocladius sp. 4ES|BIOUG36932-E07|Kate Perez|BIN Taxonomy Match (Jan 2019)|BOLD:A...

Bryophaeocladius sp. 4ES|BIOUG36932-C06|Kate Perez|BIN Taxonomy Match (Jan 2019)|BOLD:A...

Bryophaeocladius sp. 4ES|BIOUG36992-E01|Kate Perez|BIN Taxonomy Match (Jan 2019)|BOLD:A...

Bryophaeocladius sp. 4ES|BIOUG36786-G05|Kate Perez|BIN Taxonomy Match (Jan 2019)|BOLD:A...

Bryophaeocladius sp. 4ES|BIOUG36779-B02|Kate Perez|BIN Taxonomy Match (Jan 2019)|BOLD:A...

Bryophaeocladius sp. 4ES|BIOUG36818-E05|Kate Perez|BIN Taxonomy Match (Jan 2019)|BOLD:A...

Bryophaeocladius NHRS sp. A|NHRS-BYWS00000429|Yngve Brodin|morphology|BOLD:AAW1343

Bryophaeocladius sp. 4ES|CH-OSF95|Elisabeth Sturj|BOLD:AAW1343

Bryophaeocladius sp. 4ES|CH-eik135|Elisabeth Sturj|BOLD:AAW1343

Bryophaeocladius sp. 4ES|CH-eik122|Elisabeth Sturj|BOLD:AAW1343

Bryophaeocladius sp. 4ES|CH-eik37|Elisabeth Sturj|BOLD:AAW1343

Bryophaeocladius sp. 4ES|BIOUG16736-A10|Kate Perez|BIN Taxonomy Match|BOLD:AAW1343

Bryophaeocladius sp. 4ES|BIOUG16614-B03|Kate Perez|BIN Taxonomy Match|BOLD:AAW1343

Bryophaeocladius sp. 4ES|CH-eik46|Elisabeth Sturj|BOLD:AAW1343

Bryophaeocladius sp. 4ES|CH-OSF91|Elisabeth Sturj|BOLD:AAW1343

Bryophaeocladius sp. 4ES|CH-OSF82|Elisabeth Sturj|BOLD:AAW1343

Chironomidae|ZSM-DIP-33131-C08|Caroline Chimen|BIN Taxonomy Match (Jan 2022)|BOLD:ACP0146

Chironomidae|ZSM-DIP-33131-C07|Caroline Chimen|BIN Taxonomy Match (Jan 2022)|BOLD:ACP0146

Chironomidae|BIOUG04362-G10|Kate Perez|BIN Taxonomy Match|BOLD:ACB9951

Chironomidae|BIOUG04153-H02|Kate Perez|BIN Taxonomy Match|BOLD:ACB9951

Chironomidae|BIOUG04114-F11|Kate Perez|BIN Taxonomy Match|BOLD:ACB9951

Chironomidae|Koz1140|Mikhail V. Kozlov|BOLD:AAI3856

Bryophaeocladius sp. 1ES|BIOUG04119-D11|Kate Perez|BIN Taxonomy Match|BOLD:AAI3856

Bryophaeocladius sp. 1ES|BIOUG04362-E01|Kate Perez|BIN Taxonomy Match|BOLD:AAI3856

Bryophaeocladius sp. 1ES|BIOUG15809-C11|Kate Perez|BIN Taxonomy Match|BOLD:AAI3856

Bryophaeocladius sp. 1ES|BIOUG04216-E04|Kate Perez|BIN Taxonomy Match|BOLD:AAI3856

Bryophaeocladius sp. 1ES|BIOUG04212-E08|Kate Perez|BIN Taxonomy Match|BOLD:AAI3856

Bryophaeocladius sp. 1ES|BIOUG04296-H05|Kate Perez|BIN Taxonomy Match|BOLD:AAI3856

Bryophaeocladius sp. 1ES|BIOUG04362-F11|Kate Perez|BIN Taxonomy Match|BOLD:AAI3856

Bryophaeocladius sp. 1ES|BIOUG04296-G08|Kate Perez|BIN Taxonomy Match|BOLD:AAI3856

Bryophaeocladius sp. 1ES|BIOUG04153-B01|Kate Perez|BIN Taxonomy Match|BOLD:AAI3856

Bryophaeocladius sp. 1ES|BIOUG04090-G05|Kate Perez|BIN Taxonomy Match|BOLD:AAI3856

Bryophaeocladius tuberculatus|ZMUO.026176|Lauri Paasivirta|BOLD:AAI3856

Bryophaeocladius sp. 1ES|BIOUG04366-C01|Kate Perez|BIN Taxonomy Match|BOLD:AAI3856

Bryophaeocladius sp. 1ES|ATNA383|Elisabeth Sturj|BOLD:AAI3856

Bryophaeocladius sp. 1ES|BIOUG04437-G02|Kate Perez|BIN Taxonomy Match|BOLD:AAI3856

Bryophaeocladius tuberculatus|ZMUO.026177|Lauri Paasivirta|BOLD:AAI3856

Bryophaeocladius sp. 1ES|BIOUG04296-D05|Kate Perez|BIN Taxonomy Match|BOLD:AAI3856

Bryophaeocladius sp. 1ES|ATNA291|Elisabeth Sturj|BOLD:AAI3856

Bryophaeocladius sp. 1ES|BIOUG04155-C05|Kate Perez|BIN Taxonomy Match|BOLD:AAI3856

Bryophaeocladius sp. 1ES|BIOUG04155-E03|Kate Perez|BIN Taxonomy Match|BOLD:AAI3856

Bryophaeocladius sp. 1ES|BIOUG04155-E07|Kate Perez|BIN Taxonomy Match|BOLD:AAI3856

Bryophaeocladius sp. 1ES|BIOUG04155-E11|Kate Perez|BIN Taxonomy Match|BOLD:AAI3856

Bryophaeocladius sp. 1ES|BIOUG04155-G04|Kate Perez|BIN Taxonomy Match|BOLD:AAI3856

Bryophaeocladius sp. 1ES|BIOUG04362-F01|Kate Perez|BIN Taxonomy Match|BOLD:AAI3856

Bryophaeocladius sp. 1ES|BIOUG04296-D09|Kate Perez|BIN Taxonomy Match|BOLD:AAI3856

Bryophaeocladius sp. 1ES|BIOUG04155-G09|Kate Perez|BIN Taxonomy Match|BOLD:AAI3856

Chironomidae|Koz1191|Mikhail V. Kozlov|BOLD:AAI3856

Bryophaeocladius sp. 1ES|BIOUG04366-E05|Kate Perez|BIN Taxonomy Match|BOLD:AAI3856

Bryophaeocladius sp. 1ES|BIOUG04212-E12|Kate Perez|BIN Taxonomy Match|BOLD:AAI3856

Bryophaeocladius sp. 1ES|BIOUG04155-D12|Kate Perez|BIN Taxonomy Match|BOLD:AAI3856

Bryophaeocladius sp. 1ES|BIOUG04362-E05|Kate Perez|BIN Taxonomy Match|BOLD:AAI3856

Bryophaeocladius sp. 1ES|24371-H04|Kate Perez|BIN Taxonomy Match|BOLD:AAI3856

Bryophaeocladius sp. 1ES|ATNA385|Elisabeth Sturj|BOLD:AAI3856

Bryophaeocladius sp. 1ES|BIOUG04212-C08|Kate Perez|BIN Taxonomy Match|BOLD:AAI3856

Bryophaeocladius sp. 1ES|BIOUG04212-A09|Kate Perez|BIN Taxonomy Match|BOLD:AAI3856

Bryophaeocladius sp. 1ES|BIOUG04155-G03|Kate Perez|BIN Taxonomy Match|BOLD:AAI3856

Bryophaeocladius scanicus|ZSM-DIP-33142-D01|Caroline Chimen|BIN Taxonomy Match (Jan 2022)...

Bryophaeocladius scanicus|ZSM-DIP-33143-A11|Caroline Chimen|BIN Taxonomy Match (Jan 2022)...

Bryophaeocladius scanicus|ZSM-DIP-33143-G09|Caroline Chimen|BIN Taxonomy Match (Jan 2022)...

Bryophaeocladius scanicus|ZSM-DIP-33130-D09|Caroline Chimen|BIN Taxonomy Match (Jan 2022)...

Bryophaeocladius scanicus|NHRS-BYWS000001050|Yngve Brodin|morphology|BOLD:AAQ2044

Bryophaeocladius scanicus|ZSM-DIP-33141-F05|Caroline Chimen|BIN Taxonomy Match (Jan 2022)...

Bryophaeocladius scanicus|NHRS-BYWS00000169|Yngve Brodin|morphology|BOLD:AAQ2044

Bryophaeocladius sp. 2ES|24539-H07|Kate Perez|BIN Taxonomy Match|BOLD:AAQ2044

Bryophaeocladius sp. 2ES|24538-F12|Kate Perez|BIN Taxonomy Match|BOLD:AAQ2044

Bryophaeocladius nr. nidorum|ZSM-DIP-33142-A01|Caroline Chimen|BIN Taxonomy Match (Jan 2022)...

Bryophaeocladius nr. nidorum|ZSM-DIP-33143-A12|Caroline Chimen|BIN Taxonomy Match (Jan 2022)...

Bryophaeocladius nr. nidorum|ZMUO.024264|Lauri Paasivirta|BOLD:AAQ2044

Bryophaeocladius sp. 2ES|24539-E10|Kate Perez|BIN Taxonomy Match|BOLD:AAQ2044

Bryophaeocladius sp. 2ES|24538-E06|Kate Perez|BIN Taxonomy Match|BOLD:AAQ2044

Bryophaeocladius nr. nidorum|ZSM-DIP-33141-A06|Caroline Chimen|BIN Taxonomy Match (Jan 2022)...

Bryophaeocladius nr. nidorum|ZSM-DIP-33143-B03|Caroline Chimen|BIN Taxonomy Match (Jan 2022)...

Bryophaeocladius|ZSM-DIP-33143-B02|Caroline Chimen|BIN Taxonomy Match (Jan 2022)|BOLD:...

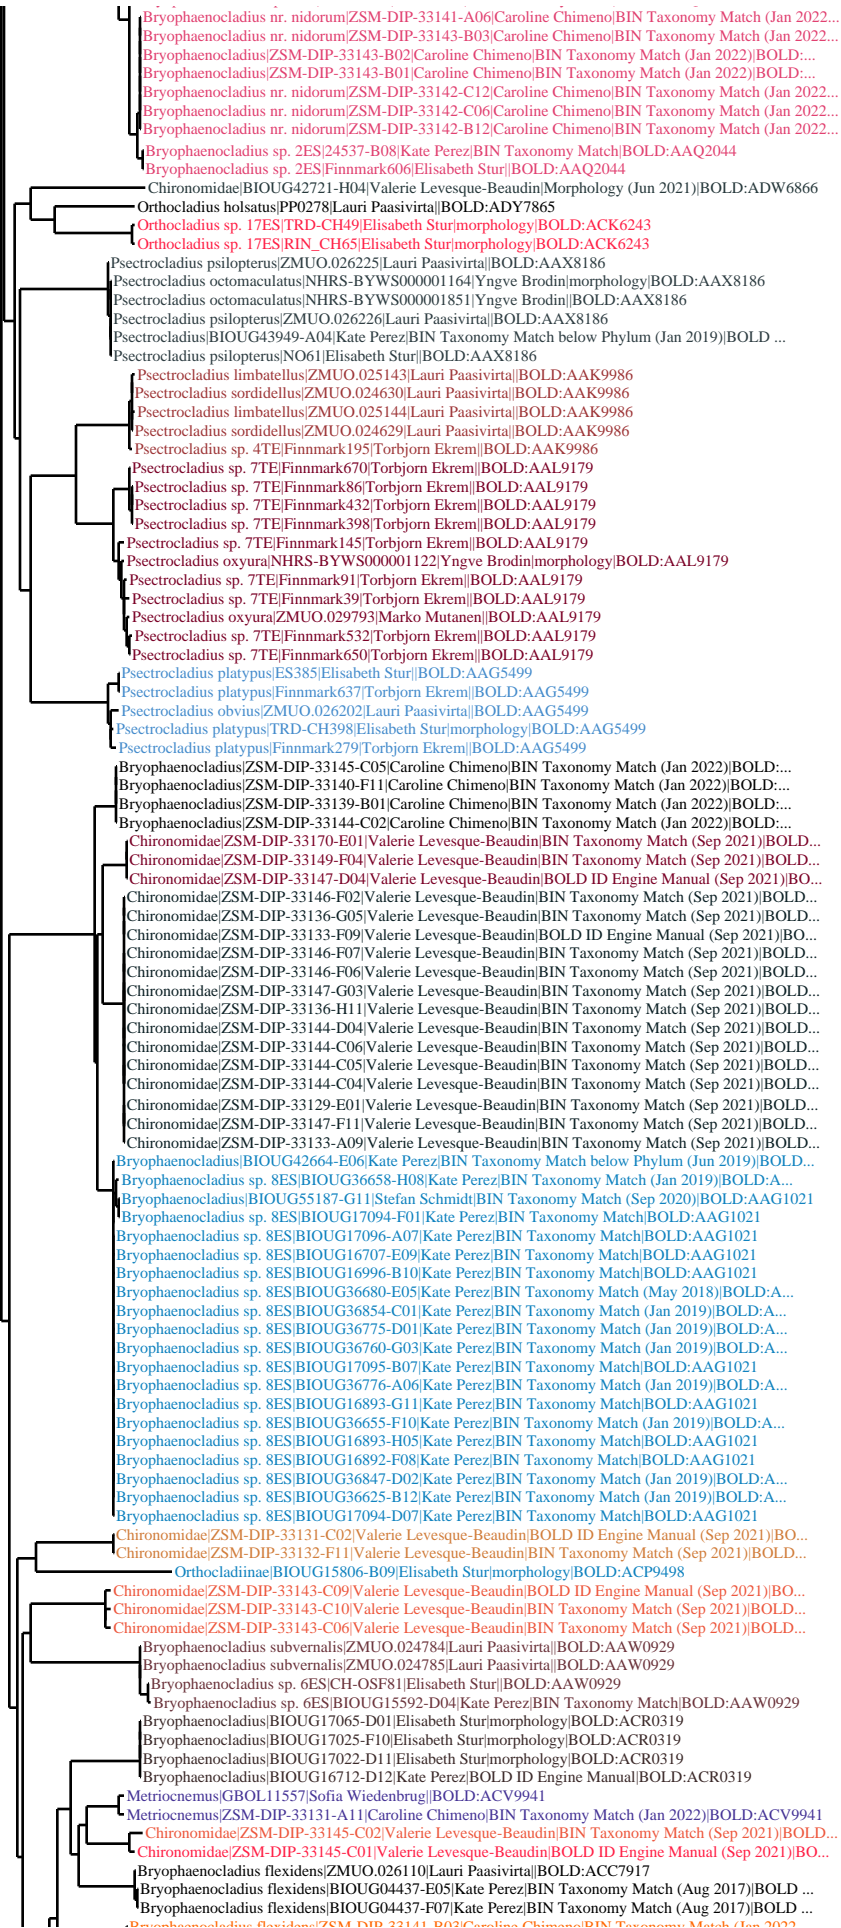

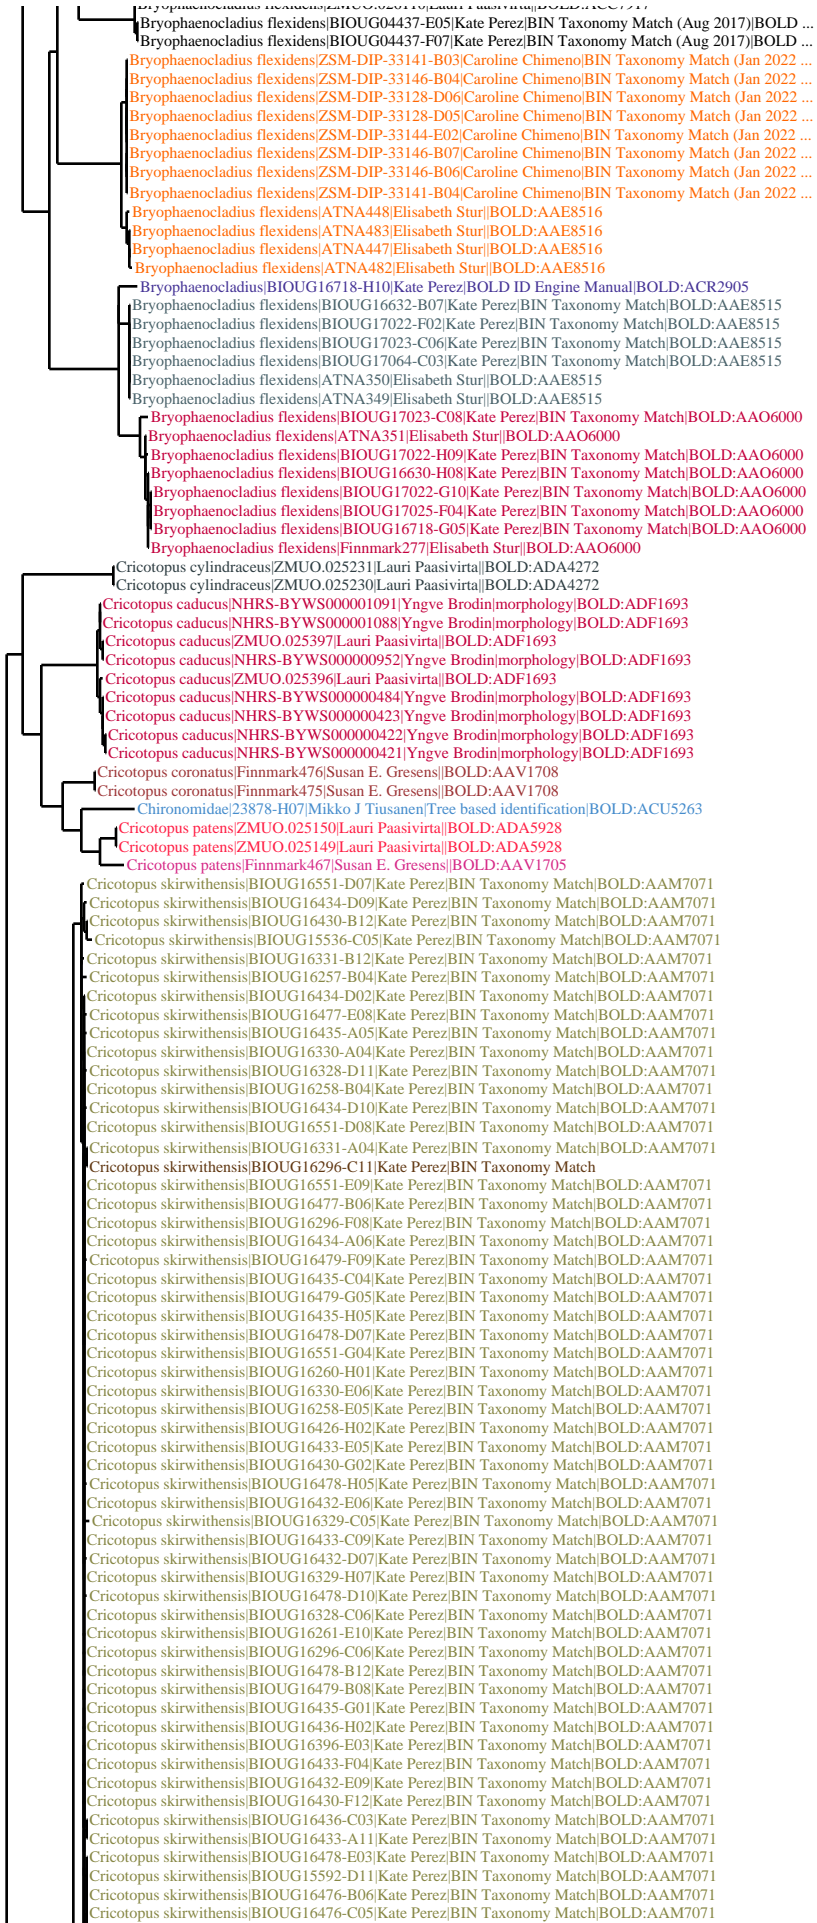









Cricotopus skirwithensis|BIOUG16430-C04|Kate Perez|BIN Taxonomy Match|BOLD:AAM7071  
 Cricotopus skirwithensis|BIOUG16430-C04|Kate Perez|BIN Taxonomy Match|BOLD:AAM7071  
 Cricotopus skirwithensis|BIOUG16434-G07|Kate Perez|BIN Taxonomy Match|BOLD:AAM7071  
 Cricotopus skirwithensis|BIOUG16433-F07|Kate Perez|BIN Taxonomy Match|BOLD:AAM7071  
 Cricotopus skirwithensis|BIOUG16435-B08|Kate Perez|BIN Taxonomy Match|BOLD:AAM7071  
 Cricotopus skirwithensis|BIOUG16435-A06|Kate Perez|BIN Taxonomy Match|BOLD:AAM7071  
 Cricotopus skirwithensis|BIOUG16430-A05|Kate Perez|BIN Taxonomy Match|BOLD:AAM7071  
 Cricotopus skirwithensis|BIOUG16261-H11|Kate Perez|BIN Taxonomy Match|BOLD:AAM7071  
 Cricotopus skirwithensis|BIOUG16330-B08|Kate Perez|BIN Taxonomy Match|BOLD:AAM7071  
 Cricotopus skirwithensis|BIOUG16330-A05|Kate Perez|BIN Taxonomy Match|BOLD:AAM7071  
 Cricotopus skirwithensis|BIOUG16257-E01|Kate Perez|BIN Taxonomy Match|BOLD:AAM7071  
 Cricotopus skirwithensis|BIOUG16257-C03|Kate Perez|BIN Taxonomy Match|BOLD:AAM7071  
 Cricotopus skirwithensis|BIOUG16551-E01|Kate Perez|BIN Taxonomy Match|BOLD:AAM7071  
 Cricotopus skirwithensis|BIOUG16552-C01|Kate Perez|BIN Taxonomy Match|BOLD:AAM7071  
 Cricotopus skirwithensis|BIOUG16332-G04|Kate Perez|BIN Taxonomy Match|BOLD:AAM7071  
 Cricotopus skirwithensis|BIOUG15541-F07|Kate Perez|BIN Taxonomy Match|BOLD:AAM7071  
 Cricotopus skirwithensis|BIOUG16431-F08|Kate Perez|BIN Taxonomy Match|BOLD:AAM7071  
 Cricotopus skirwithensis|BIOUG16255-D10|Kate Perez|BIN Taxonomy Match|BOLD:AAM7071  
 Cricotopus skirwithensis|BIOUG16333-G06|Kate Perez|BIN Taxonomy Match|BOLD:AAM7071  
 Cricotopus skirwithensis|BIOUG16431-E01|Kate Perez|BIN Taxonomy Match|BOLD:AAM7071  
 Cricotopus skirwithensis|BIOUG16297-F08|Kate Perez|BIN Taxonomy Match|BOLD:AAM7071  
 Cricotopus skirwithensis|BIOUG16328-G04|Kate Perez|BIN Taxonomy Match|BOLD:AAM7071  
 Cricotopus skirwithensis|BIOUG16299-G09|Kate Perez|BIN Taxonomy Match|BOLD:AAM7071  
 Cricotopus skirwithensis|BIOUG16551-E08|Kate Perez|BIN Taxonomy Match|BOLD:AAM7071  
 Cricotopus skirwithensis|BIOUG16256-D01|Kate Perez|BIN Taxonomy Match|BOLD:AAM7071  
 Cricotopus skirwithensis|BIOUG16260-A11|Kate Perez|BIN Taxonomy Match|BOLD:AAM7071  
 Cricotopus skirwithensis|BIOUG15541-G07|Kate Perez|BIN Taxonomy Match|BOLD:AAM7071  
 Cricotopus skirwithensis|BIOUG16480-F01|Kate Perez|BIN Taxonomy Match|BOLD:AAM7071  
 Cricotopus skirwithensis|BIOUG16260-A04|Kate Perez|BIN Taxonomy Match|BOLD:AAM7071  
 Cricotopus skirwithensis|BIOUG16432-G04|Kate Perez|BIN Taxonomy Match|BOLD:AAM7071  
 Cricotopus skirwithensis|BIOUG16431-E09|Kate Perez|BIN Taxonomy Match|BOLD:AAM7071  
 Cricotopus skirwithensis|BIOUG16552-D01|Kate Perez|BIN Taxonomy Match|BOLD:AAM7071  
 Cricotopus skirwithensis|BIOUG16435-B09|Kate Perez|BIN Taxonomy Match|BOLD:AAM7071  
 Cricotopus skirwithensis|BIOUG16396-D06|Kate Perez|BIN Taxonomy Match|BOLD:AAM7071  
 Cricotopus skirwithensis|BIOUG16435-H01|Kate Perez|BIN Taxonomy Match|BOLD:AAM7071  
 Cricotopus skirwithensis|BIOUG16477-G11|Kate Perez|BIN Taxonomy Match|BOLD:AAM7071  
 Cricotopus skirwithensis|BIOUG16480-C09|Kate Perez|BIN Taxonomy Match|BOLD:AAM7071  
 Cricotopus skirwithensis|BIOUG16476-F03|Kate Perez|BIN Taxonomy Match|BOLD:AAM7071  
 Cricotopus skirwithensis|BIOUG16479-C08|Kate Perez|BIN Taxonomy Match|BOLD:AAM7071  
 Cricotopus skirwithensis|BIOUG16480-C08|Kate Perez|BIN Taxonomy Match|BOLD:AAM7071  
 Cricotopus skirwithensis|BIOUG16258-B06|Kate Perez|BIN Taxonomy Match|BOLD:AAM7071  
 Cricotopus skirwithensis|BIOUG16434-B04|Kate Perez|BIN Taxonomy Match|BOLD:AAM7071  
 Cricotopus skirwithensis|BIOUG16478-G05|Kate Perez|BIN Taxonomy Match|BOLD:AAM7071  
 Cricotopus skirwithensis|BIOUG16477-F10|Kate Perez|BIN Taxonomy Match|BOLD:AAM7071  
 Cricotopus skirwithensis|BIOUG15674-E10|Kate Perez|BIN Taxonomy Match|BOLD:AAM7071  
 Cricotopus skirwithensis|BIOUG16433-H08|Kate Perez|BIN Taxonomy Match|BOLD:AAM7071  
 Cricotopus skirwithensis|BIOUG16258-C07|Kate Perez|BIN Taxonomy Match|BOLD:AAM7071  
 Cricotopus skirwithensis|BIOUG15544-D12|Kate Perez|BIN Taxonomy Match|BOLD:AAM7071  
 Cricotopus skirwithensis|BIOUG16299-D12|Kate Perez|BIN Taxonomy Match|BOLD:AAM7071  
 Cricotopus skirwithensis|BIOUG16592-C03|Kate Perez|BIN Taxonomy Match|BOLD:AAM7071  
 Cricotopus skirwithensis|BIOUG16479-B06|Kate Perez|BIN Taxonomy Match|BOLD:AAM7071  
 Cricotopus skirwithensis|BIOUG16329-G03|Kate Perez|BIN Taxonomy Match|BOLD:AAM7071  
 Cricotopus skirwithensis|BIOUG16297-H10|Kate Perez|BIN Taxonomy Match|BOLD:AAM7071  
 Cricotopus skirwithensis|BIOUG15766-F02|Kate Perez|BIN Taxonomy Match|BOLD:AAM7071  
 Chironomidae|ZSM-DIP-33136-D09|Caroline Chimento|BIN Taxonomy Match (Jan 2022)|BOLD:ACU5356  
 Chironomidae|ZSM-DIP-33140-B02|Caroline Chimento|BIN Taxonomy Match (Jan 2022)|BOLD:ACU5356  
 Chironomidae|BC-ZSM-DIP-22551-F03|Dieter Doczkal|BIN Taxonomy Match|BOLD:ACU5356  
 Chironomidae|CCDB24037-A03|Jerome Moriniere|BIN Taxonomy Match|BOLD:ACU5356  
 Cricotopus|CCDB24039-D09|Sofia Wiedenbrug|BIN Taxonomy Match|BOLD:ACU4640  
 Cricotopus|CCDB24039-D02|Sofia Wiedenbrug|BIN Taxonomy Match|BOLD:ACU4640  
 Cricotopus skirwithensis|ZMUO.025893|Lauri Paasivirta|BOLD:ACK7136  
 Cricotopus skirwithensis|ZMUO.024834|Lauri Paasivirta|BOLD:ACK7136  
 Cricotopus skirwithensis|ZMUO.025892|Lauri Paasivirta|BOLD:ACK7136  
 Cricotopus skirwithensis|ZMUO.024833|Lauri Paasivirta|BOLD:ACK7136  
 Cricotopus nivalis|BIOUG07503-C02|Kate Perez|BIN Taxonomy Match|BOLD:ACK7136  
 Cricotopus nivalis|CCDB24228-A05|Sofia Wiedenbrug|BIN Taxonomy Match|BOLD:AAB5829  
 Cricotopus nivalis|CCDB24039-F02|Sofia Wiedenbrug|BIN Taxonomy Match|BOLD:AAB5829  
 Cricotopus nivalis|ES37|Torbjorn Ekrem|BOLD:AAB5829  
 Cricotopus nivalis|ES36|Torbjorn Ekrem|BOLD:AAB5829  
 Cricotopus nivalis|ATNA272|Torbjorn Ekrem|BOLD:AAB5829  
 Cricotopus nivalis|ATNA283|Torbjorn Ekrem|BOLD:AAB5829  
 Cricotopus nivalis|ATNA301|Torbjorn Ekrem|BOLD:AAB5829  
 Cricotopus nivalis|SOE403|Torbjorn Ekrem|BOLD:AAB5829  
 Cricotopus nivalis|SOE186|Torbjorn Ekrem|BOLD:AAB5829  
 Cricotopus nivalis|SOE255|Torbjorn Ekrem|BOLD:AAB5829  
 Cricotopus nivalis|BC-ZSM-DIP-22551-C12|Dieter Doczkal|BOLD:AAB5829  
 Cricotopus nivalis|SOE229|Torbjorn Ekrem|BOLD:AAB5829  
 Cricotopus nivalis|ATNA273|Torbjorn Ekrem|BOLD:AAB5829  
 Cricotopus nivalis|SOE253|Torbjorn Ekrem|BOLD:AAB5829  
 Cricotopus nivalis|SOE230|Torbjorn Ekrem|BOLD:AAB5829  
 Cricotopus nivalis|SOE213|Torbjorn Ekrem|BOLD:AAB5829  
 Cricotopus nivalis|SOE207|Torbjorn Ekrem|BOLD:AAB5829  
 Cricotopus nivalis|SOE426|Torbjorn Ekrem|BOLD:AAB5829  
 Cricotopus nivalis|SOE402|Torbjorn Ekrem|BOLD:AAB5829  
 Cricotopus nivalis|SOE101|Torbjorn Ekrem|BOLD:AAB5829  
 Cricotopus nivalis|ATNA289|Torbjorn Ekrem|BOLD:AAB5829  
 Cricotopus nivalis|SOE355|Torbjorn Ekrem|BOLD:AAB5829  
 Cricotopus nivalis|SOE100|Torbjorn Ekrem|BOLD:AAB5829  
 Cricotopus osellai|ATNA480|Elisabeth Stur|BOLD:AAD1506  
 Cricotopus osellai|ES102|Torbjorn Ekrem|BOLD:AAD1506  
 Cricotopus osellai|SOE132|Torbjorn Ekrem|BOLD:AAD1506  
 Cricotopus osellai|SOE124|Torbjorn Ekrem|BOLD:AAD1506  
 Cricotopus osellai|ES101|Torbjorn Ekrem|BOLD:AAD1506  
 Cricotopus osellai|SOE212|Torbjorn Ekrem|BOLD:AAD1506  
 Cricotopus osellai|ATNA352|Torbjorn Ekrem|BOLD:AAD1506  
 Cricotopus osellai|BIOUG16711-H04|Kate Perez|BIN Taxonomy Match|BOLD:AAD1506  
 Cricotopus osellai|ATNA475|Elisabeth Stur|BOLD:AAD1506  
 Cricotopus osellai|ATNA171|Torbjorn Ekrem|BOLD:AAD1506  
 Cricotopus osellai|ATNA159|Torbjorn Ekrem|BOLD:AAD1506  
 Cricotopus skirwithensis|ZMUO.026325|Lauri Paasivirta|BOLD:AAD1506  
 Cricotopus osellai|BIOUG17022-H11|Kate Perez|BIN Taxonomy Match|BOLD:AAD1506  
 Cricotopus osellai|BIOUG15185-E09|Kate Perez|BIN Taxonomy Match|BOLD:AAD1506  
 Cricotopus osellai|Finmark609|Elisabeth Stur|BOLD:AAD1506

Cricotopus osellai|BIOUG17022-H11|Kate Perez|BIN Taxonomy Match|BOLD:AAD1506  
 Cricotopus osellai|BIOUG15185-E09|Kate Perez|BIN Taxonomy Match|BOLD:AAD1506  
 Cricotopus osellai|Finnmark609|Elisabeth Sturj|BOLD:AAD1506  
 Procladius sp. PROC\_SIM7\_1|KY225357  
 Nilotanypus dubius|ZMUO.025203|Lauri Paasivirta|BOLD:ADA3224  
 Nilotanypus dubius|ZMUO.025202|Lauri Paasivirta|BOLD:ADA3224  
 Nilotanypus dubius|EJV-20110183|Lauri Paasivirta|BOLD:AAW4683  
 Nilotanypus dubius|EJV-20110182|Lauri Paasivirta|BOLD:AAW4683  
 Nilotanypus dubius|EJV-20110184|Lauri Paasivirta|BOLD:AAW4682  
 Nilotanypus dubius|EJV-20110181|Lauri Paasivirta|BOLD:AAW4682  
 Tvetenia calvescens|EBAl-Ch099|Elisabeth Sturj|morphology|BOLD:AAU0004  
 Tvetenia calvescens|CH-OSF129|Elisabeth Sturj|BOLD:AAU0004  
 Tvetenia calvescens|EBAl-Ch100|Elisabeth Sturj|morphology|BOLD:AAU0004  
 Tvetenia calvescens|EBAl-Ch101|Elisabeth Sturj|morphology|BOLD:AAU0004  
 Tvetenia calvescens|CH-OSF128|Elisabeth Sturj|BOLD:AAU0004  
 Tvetenia calvescens|CH-OSF60|Elisabeth Sturj|BOLD:AAU0004  
 Tvetenia calvescens|Finnmark873|Elisabeth Sturj|morphology|BOLD:AAU0004  
 Tvetenia calvescens|Finnmark775|G. A. Halvorsen|BOLD:AAU0004  
 Tvetenia calvescens|Finnmark519|Elisabeth Sturj|BOLD:AAU0004  
 Tvetenia calvescens|ZSM-DIP-33147-A01|Caroline Chimenoi|BIN Taxonomy Match (Jan 2022)|BOLD ...  
 Orthoclaadiinae|BIOUG16360-H01|Kate Perez|BIN Taxonomy Match|BOLD:AAG1011  
 Tvetenia calvescens|PK-192-66|Petra Kranzfelder|morphology|BOLD:AAG1011  
 Tvetenia calvescens|BIOUG15592-A02|Kate Perez|BIN Taxonomy Match|BOLD:AAG1011  
 Tvetenia calvescens|BIOUG15852-G10|Kate Perez|BIN Taxonomy Match|BOLD:AAG1011  
 Tvetenia calvescens|BIOUG16631-H06|Kate Perez|BIN Taxonomy Match|BOLD:AAG1011  
 Tvetenia calvescens|BIOUG16632-H06|Kate Perez|BIN Taxonomy Match|BOLD:AAG1011  
 Tvetenia calvescens|PK-192-108|Petra Kranzfelder|morphology|BOLD:AAG1011  
 Tvetenia calvescens|BIOUG16631-A04|Kate Perez|BIN Taxonomy Match|BOLD:AAG1011  
 Tvetenia calvescens|PK-192-128|Petra Kranzfelder|morphology|BOLD:AAG1011  
 Tvetenia calvescens|BIOUG15792-D09|Kate Perez|BIN Taxonomy Match|BOLD:AAG1011  
 Tvetenia calvescens|BIOUG16713-D02|Kate Perez|BIN Taxonomy Match|BOLD:AAG1011  
 Tvetenia calvescens|BIOUG16330-C04|Kate Perez|BIN Taxonomy Match|BOLD:AAG1011  
 Tvetenia calvescens|BIOUG16331-C06|Kate Perez|BIN Taxonomy Match|BOLD:AAG1011  
 Tvetenia calvescens|BIOUG16331-G08|Kate Perez|BIN Taxonomy Match|BOLD:AAG1011  
 Tvetenia calvescens|BIOUG16260-B09|Kate Perez|BIN Taxonomy Match|BOLD:AAG1011  
 Tvetenia calvescens|BIOUG16712-F09|Kate Perez|BIN Taxonomy Match|BOLD:AAG1011  
 Tvetenia calvescens|BIOUG15564-D05|Kate Perez|BIN Taxonomy Match|BOLD:AAG1011  
 Tvetenia calvescens|BIOUG16296-D05|Kate Perez|BIN Taxonomy Match|BOLD:AAG1011  
 Tvetenia calvescens|BIOUG16711-E05|Kate Perez|BIN Taxonomy Match|BOLD:AAG1011  
 Tvetenia calvescens|BIOUG16718-F01|Kate Perez|BIN Taxonomy Match|BOLD:AAG1011  
 Tvetenia calvescens|BIOUG16430-H10|Kate Perez|BIN Taxonomy Match|BOLD:AAG1011  
 Tvetenia calvescens|BIOUG15675-C03|Kate Perez|BIN Taxonomy Match|BOLD:AAG1011  
 Tvetenia calvescens|BIOUG16630-G12|Kate Perez|BIN Taxonomy Match|BOLD:AAG1011  
 Tvetenia calvescens|BIOUG16597-D09|Kate Perez|BIN Taxonomy Match|BOLD:AAG1011  
 Tvetenia calvescens|BIOUG16332-F01|Kate Perez|BIN Taxonomy Match|BOLD:AAG1011  
 Tvetenia calvescens|BIOUG16396-D11|Kate Perez|BIN Taxonomy Match|BOLD:AAG1011  
 Tvetenia calvescens|BIOUG15762-G10|Kate Perez|BIN Taxonomy Match|BOLD:AAG1011  
 Tvetenia calvescens|BIOUG16297-E04|Kate Perez|BIN Taxonomy Match|BOLD:AAG1011  
 Tvetenia calvescens|BIOUG16328-F10|Kate Perez|BIN Taxonomy Match|BOLD:AAG1011  
 Tvetenia calvescens|BIOUG15597-A05|Kate Perez|BIN Taxonomy Match|BOLD:AAG1011  
 Tvetenia calvescens|BIOUG15649-C08|Kate Perez|BIN Taxonomy Match|BOLD:AAG1011  
 Tvetenia calvescens|BIOUG15648-G03|Kate Perez|BIN Taxonomy Match|BOLD:AAG1011  
 Tvetenia calvescens|BIOUG16713-E05|Kate Perez|BIN Taxonomy Match|BOLD:AAG1011  
 Tvetenia calvescens|BIOUG16477-A11|Kate Perez|BIN Taxonomy Match|BOLD:AAG1011  
 Tvetenia calvescens|BIOUG16711-E10|Kate Perez|BIN Taxonomy Match|BOLD:AAG1011  
 Tvetenia calvescens|BIOUG16632-G07|Kate Perez|BIN Taxonomy Match|BOLD:AAG1011  
 Tvetenia calvescens|BIOUG16432-G05|Kate Perez|BIN Taxonomy Match|BOLD:AAG1011  
 Tvetenia calvescens|BIOUG16430-B10|Kate Perez|BIN Taxonomy Match|BOLD:AAG1011  
 Tvetenia calvescens|BIOUG15806-D05|Kate Perez|BIN Taxonomy Match|BOLD:AAG1011  
 Tvetenia calvescens|BIOUG16331-A02|Kate Perez|BIN Taxonomy Match|BOLD:AAG1011  
 Tvetenia calvescens|BIOUG15681-G02|Kate Perez|BIN Taxonomy Match|BOLD:AAG1011  
 Tvetenia calvescens|BIOUG15674-H01|Kate Perez|BIN Taxonomy Match|BOLD:AAG1011  
 Tvetenia calvescens|BIOUG15852-B09|Kate Perez|BIN Taxonomy Match|BOLD:AAG1011  
 Tvetenia calvescens|BIOUG16632-G10|Kate Perez|BIN Taxonomy Match|BOLD:AAG1011  
 Tvetenia calvescens|BIOUG16476-H08|Kate Perez|BIN Taxonomy Match|BOLD:AAG1011  
 Tvetenia calvescens|BIOUG16630-G08|Kate Perez|BIN Taxonomy Match|BOLD:AAG1011  
 Tvetenia calvescens|BIOUG16632-E07|Kate Perez|BIN Taxonomy Match|BOLD:AAG1011  
 Tvetenia calvescens|BIOUG16592-B06|Kate Perez|BIN Taxonomy Match|BOLD:AAG1011  
 Tvetenia calvescens|BIOUG15853-D02|Kate Perez|BIN Taxonomy Match|BOLD:AAG1011  
 Tvetenia calvescens|BIOUG16435-H03|Kate Perez|BIN Taxonomy Match|BOLD:AAG1011  
 Tvetenia calvescens|BIOUG16631-F03|Kate Perez|BIN Taxonomy Match|BOLD:AAG1011  
 Tvetenia calvescens|BIOUG16631-B02|Kate Perez|BIN Taxonomy Match|BOLD:AAG1011  
 Tvetenia calvescens|BIOUG16713-E04|Kate Perez|BIN Taxonomy Match|BOLD:AAG1011  
 Tvetenia calvescens|BIOUG16630-H11|Kate Perez|BIN Taxonomy Match|BOLD:AAG1011  
 Tvetenia calvescens|BIOUG15852-D03|Kate Perez|BIN Taxonomy Match|BOLD:AAG1011  
 Tvetenia calvescens|BIOUG16552-E02|Kate Perez|BIN Taxonomy Match|BOLD:AAG1011  
 Tvetenia calvescens|BIOUG15538-C08|Kate Perez|BIN Taxonomy Match|BOLD:AAG1011  
 Tvetenia calvescens|BIOUG16631-H07|Kate Perez|BIN Taxonomy Match|BOLD:AAG1011  
 Tvetenia calvescens|BIOUG15592-B08|Kate Perez|BIN Taxonomy Match|BOLD:AAG1011  
 Tvetenia calvescens|ATNA206|Elisabeth Sturj|BOLD:AAG1011  
 Tvetenia calvescens|BIOUG16631-D10|Kate Perez|BIN Taxonomy Match|BOLD:AAG1011  
 Tvetenia calvescens|BIOUG15648-A11|Kate Perez|BIN Taxonomy Match|BOLD:AAG1011  
 Tvetenia calvescens|PK-192-116|Petra Kranzfelder|morphology|BOLD:AAG1011  
 Tvetenia calvescens|BIOUG16436-H04|Kate Perez|BIN Taxonomy Match|BOLD:AAG1011  
 Tvetenia calvescens|BIOUG16435-E04|Kate Perez|BIN Taxonomy Match|BOLD:AAG1011  
 Tvetenia calvescens|BIOUG16329-F08|Kate Perez|BIN Taxonomy Match|BOLD:AAG1011  
 Tvetenia calvescens|BIOUG16557-F08|Kate Perez|BIN Taxonomy Match|BOLD:AAG1011  
 Tvetenia calvescens|BIOUG16597-B05|Kate Perez|BIN Taxonomy Match|BOLD:AAG1011  
 Tvetenia calvescens|BIOUG16478-C03|Kate Perez|BIN Taxonomy Match|BOLD:AAG1011  
 Tvetenia calvescens|BIOUG15807-B09|Kate Perez|BIN Taxonomy Match|BOLD:AAG1011  
 Tvetenia calvescens|BIOUG16332-F11|Kate Perez|BIN Taxonomy Match|BOLD:AAG1011  
 Tvetenia calvescens|BIOUG16333-A09|Kate Perez|BIN Taxonomy Match|BOLD:AAG1011  
 Tvetenia calvescens|BIOUG15808-B09|Kate Perez|BIN Taxonomy Match|BOLD:AAG1011  
 Tvetenia calvescens|BIOUG15809-A09|Kate Perez|BIN Taxonomy Match|BOLD:AAG1011  
 Tvetenia calvescens|BIOUG16330-H03|Kate Perez|BIN Taxonomy Match|BOLD:AAG1011  
 Tvetenia calvescens|BIOUG16711-E07|Kate Perez|BIN Taxonomy Match|BOLD:AAG1011  
 Tvetenia calvescens|BIOUG16711-E08|Kate Perez|BIN Taxonomy Match|BOLD:AAG1011  
 Tvetenia calvescens|BIOUG17023-C10|Kate Perez|BIN Taxonomy Match|BOLD:AAG1011  
 Tvetenia calvescens|BIOUG16631-C12|Kate Perez|BIN Taxonomy Match|BOLD:AAG1011  
 Tvetenia calvescens|BIOUG17022-F08|Kate Perez|BIN Taxonomy Match|BOLD:AAG1011  
 Tvetenia calvescens|PK-192-115|Petra Kranzfelder|morphology  
 Tvetenia calvescens|BIOUG16597-C07|Kate Perez|BIN Taxonomy Match|BOLD:AAG1011  
 Tvetenia calvescens|BIOUG16396-C03|Kate Perez|BIN Taxonomy Match|BOLD:AAG1011



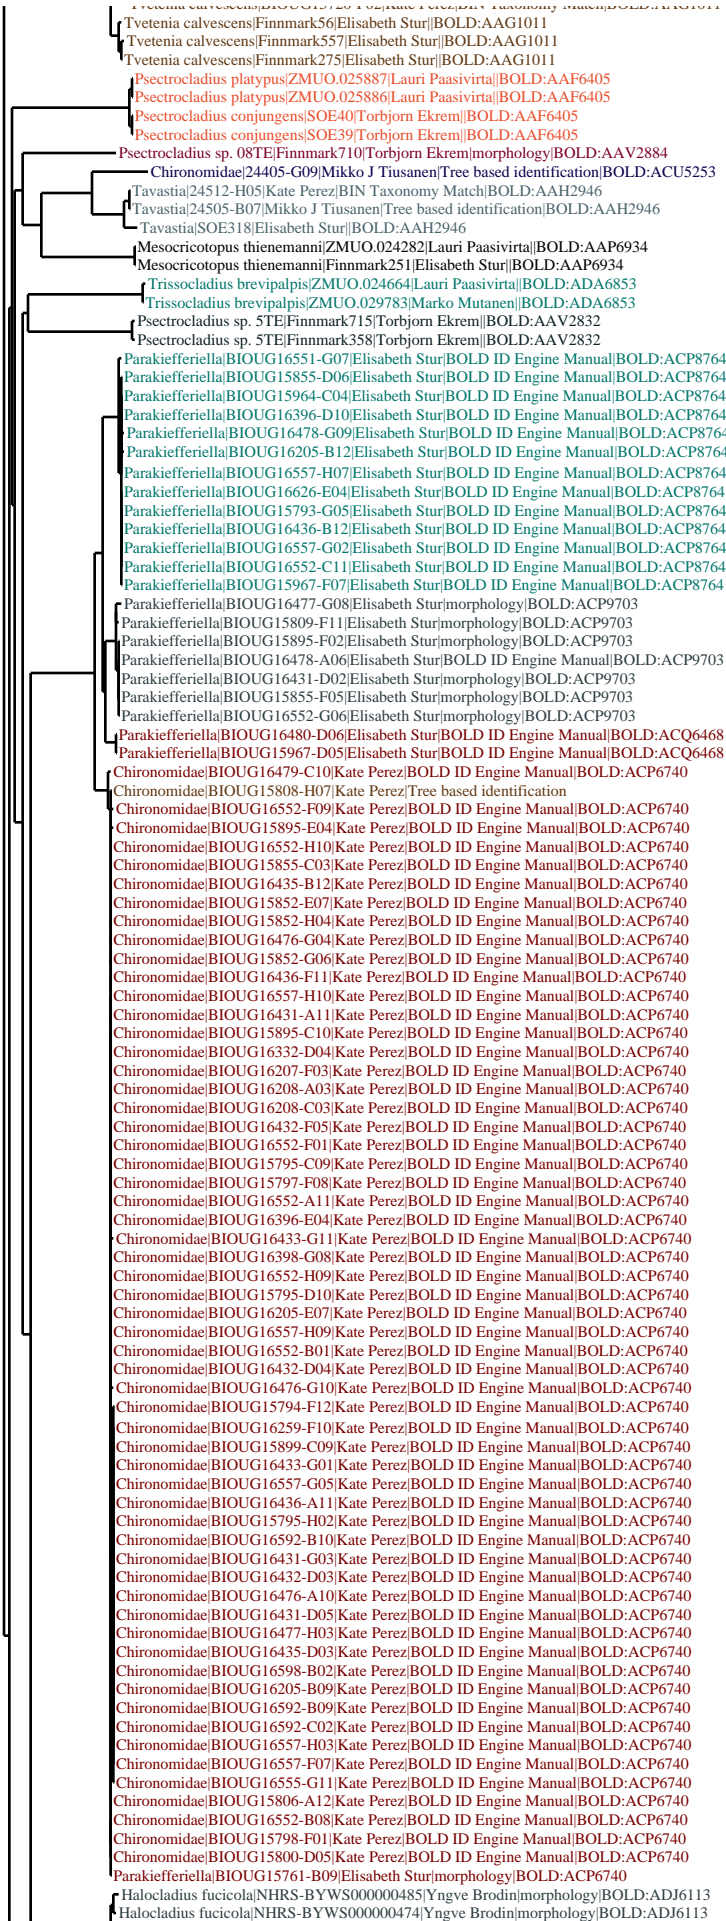

\*arakieteneia|BIOUG17-01-B09|Elisabeth Stur|morphology|BOLD:AC16740  
 Halocladius fucicola|NHRS-BYWS000000485|Yngve Brodin|morphology|BOLD:ADJ6113  
 Halocladius fucicola|NHRS-BYWS000000474|Yngve Brodin|morphology|BOLD:ADJ6113  
 Halocladius fucicola|NHRS-BYWS000000473|Yngve Brodin|morphology|BOLD:ADJ6113  
 Halocladius fucicola|NHRS-BYWS000000472|Yngve Brodin|morphology|BOLD:ADJ6113  
 Halocladius variabilis|NHRS-BYWS000000482|Yngve Brodin|morphology|BOLD:AAB8751  
 Halocladius variabilis|CH-OSF160|Elisabeth Stur|BOLD:AAB8751  
 Halocladius variabilis|NHRS-BYWS000000468|Yngve Brodin|morphology|BOLD:AAB8751  
 Halocladius variabilis|CH-OSF94|Elisabeth Stur|BOLD:AAB8751  
 Halocladius variabilis|NHRS-BYWS000000172|Yngve Brodin|morphology|BOLD:AAB8751  
 Halocladius variabilis|NHRS-BYWS000000424|Yngve Brodin|morphology|BOLD:AAB8751  
 Halocladius variabilis|CH-OSF92|Elisabeth Stur|BOLD:AAB8751  
 Halocladius variabilis|CH-eik94|Elisabeth Stur|BOLD:AAB8751  
 Halocladius variabilis|CH-OSF76|Elisabeth Stur|BOLD:AAB8751  
 Halocladius variabilis|NHRS-BYWS000000308|Yngve Brodin|morphology|BOLD:AAB8751  
 Halocladius variabilis|NHRS-BYWS000000481|Yngve Brodin|morphology|BOLD:AAB8751  
 Halocladius variabilis|NHRS-BYWS000001768|Yngve Brodin|BOLD:AAB8751  
 Halocladius variabilis|Finmark67|Elisabeth Stur|BOLD:AAB8751  
 Halocladius variabilis|CH-OSF93|Elisabeth Stur|BOLD:AAB8751  
 Halocladius variabilis|TRD-CH332|Elisabeth Stur|BOLD:AAB8751  
 Halocladius variabilis|RIN\_CH02|Mona Renate Saurasunet|BOLD Identification engine|BOLD:AAB8751  
 Halocladius variabilis|NHRS-BYWS000000179|Yngve Brodin|morphology|BOLD:AAB8751  
 Halocladius variabilis|Finmark435|Elisabeth Stur|BOLD:AAB8751  
 Halocladius variabilis|Finmark94|Elisabeth Stur|BOLD:AAB8751  
 Halocladius variabilis|CH-eik107|Elisabeth Stur|BOLD:AAB8751  
 Halocladius variabilis|ZMUO.025243|Lauri Paasivirta|BOLD:AAB8751  
 Halocladius variabilis|CH-eik84|Elisabeth Stur|BOLD:AAB8751  
 Halocladius variabilis|CH-eik99|Elisabeth Stur|BOLD:AAB8751  
 Halocladius variabilis|CH-eik95|Elisabeth Stur|BOLD:AAB8751  
 Halocladius variabilis|Finmark694|Elisabeth Stur|BOLD:AAB8751  
 Halocladius variabilis|CH-OSF161|Elisabeth Stur|BOLD:AAB8751  
 Halocladius variabilis|CH-eik96|Elisabeth Stur|BOLD:AAB8751  
 Halocladius variabilis|NHRS-BYWS000000410|Yngve Brodin|morphology|BOLD:AAB8751  
 Halocladius variabilis|TRD-CH163|Elisabeth Stur|BOLD:AAB8751  
 Halocladius variabilis|ZMUO.025244|Lauri Paasivirta|BOLD:AAB8751  
 Halocladius variabilis|TRD-CH162|Elisabeth Stur  
 Halocladius variabilis|BIOUG16260-G01|Kate Perez|BIN Taxonomy Match|BOLD:AAB8751  
 Halocladius variabilis|CH-OSF77|Elisabeth Stur|BOLD:AAB8751  
 Halocladius variabilis|NHRS-BYWS000001849|Yngve Brodin|BOLD:AAB8751  
 Halocladius variabilis|Finmark329|Elisabeth Stur|BOLD:AAB8751  
 Halocladius variabilis|Finmark311|Elisabeth Stur|BOLD:AAB8751  
 Halocladius variabilis|Finmark638|Elisabeth Stur|BOLD:AAB8751  
 Halocladius variabilis|NHRS-BYWS000000173|Yngve Brodin|morphology|BOLD:AAB8751  
 Halocladius variabilis|Finmark407|Elisabeth Stur|BOLD:AAB8751  
 Halocladius variabilis|NHRS-BYWS000001769|Yngve Brodin|BOLD:AAB8751  
 Halocladius variabilis|Finmark294|Elisabeth Stur|BOLD:AAB8751  
 Nilotanypus|BIOUG07413-G10|Valerie Levesque-Beaudin|BOLD:ACI6308  
 Nilotanypus|BIOUG07807-H04|Kate Perez|BIN Taxonomy Match|BOLD:ACI6308  
 Nilotanypus|BIOUG08125-C07|Valerie Levesque-Beaudin|BOLD:ACI6308  
 Nilotanypus dubius|EBAI-Ch162|Elisabeth Stur|morphology|BOLD:AAP5790  
 Nilotanypus dubius|TRD-Cer195|Elisabeth Stur|BOLD:AAP5790  
 Nilotanypus dubius|EBAI-Ch161|Elisabeth Stur|morphology|BOLD:AAP5790  
 Nilotanypus dubius|EBAI-Ch246|Elisabeth Stur|morphology|BOLD:AAP5790  
 Nilotanypus dubius|TRD-Cer210|Elisabeth Stur|BOLD:AAP5790  
 Nilotanypus dubius|TRD-Cer209|Elisabeth Stur|BOLD:AAP5790  
 Nilotanypus dubius|TRD-Cer208|Elisabeth Stur|BOLD:AAP5790  
 Nilotanypus dubius|Finmark877|G. A. Halvorsen|BOLD:AAP5790  
 Nilotanypus dubius|Finmark210|Elisabeth Stur|BOLD:AAP5790  
 Nilotanypus dubius|Finmark209|Elisabeth Stur|BOLD:AAP5790  
 Nilotanypus dubius|Finmark173|Elisabeth Stur|BOLD:AAP5790  
 Nilotanypus dubius|Finmark256|Elisabeth Stur|BOLD:AAP5790  
 Synorthocladius|BIOUG17112-D12|Kate Perez|BOLD ID Engine Manual|BOLD:ACR6475  
 Synorthocladius semivirens|EJV-20110200|Lauri Paasivirta|BOLD:ACM5335  
 Chironomidae|B12019\_K05|Knut Andreas Eikland|BOLD ID-Engine  
 Synorthocladius semivirens|CH-OSF140|Elisabeth Stur|BOLD:ACM5335  
 Synorthocladius semivirens|CH-OSF139|Elisabeth Stur|BOLD:ACM5335  
 Synorthocladius semivirens|EJV-20110197|Lauri Paasivirta|BOLD:ACM5335  
 Synorthocladius semivirens|ZMUO.024607|Lauri Paasivirta|BOLD:ACM5335  
 Synorthocladius semivirens|NHRS-BYWS000000150|Yngve Brodin|morphology|BOLD:ACM5335  
 Synorthocladius semivirens|EJV-20110199|Lauri Paasivirta|BOLD:ACM5335  
 Synorthocladius semivirens|EJV-20110198|Lauri Paasivirta|BOLD:ACM5335  
 Synorthocladius semivirens|BIOUG42738-B04|Kate Perez|BIN Taxonomy Match below Phylum (Jun 2019...  
 Synorthocladius semivirens|Finmark847|Elisabeth Stur|BOLD:AAK6026  
 Synorthocladius semivirens|NHRS-BYWS000000926|Yngve Brodin|morphology|BOLD:AAK6026  
 Synorthocladius semivirens|BIOUG16330-E04|Kate Perez|BIN Taxonomy Match|BOLD:AAK6026  
 Synorthocladius semivirens|BIOUG16299-G07|Kate Perez|BIN Taxonomy Match|BOLD:AAK6026  
 Synorthocladius semivirens|BIOUG16329-F10|Kate Perez|BIN Taxonomy Match|BOLD:AAK6026  
 Synorthocladius semivirens|ZMUO.024606|Lauri Paasivirta|BOLD:AAK6026  
 Synorthocladius semivirens|BIOUG16398-C02|Kate Perez|BIN Taxonomy Match|BOLD:AAK6026  
 Synorthocladius semivirens|SOE200|Elisabeth Stur|BOLD:AAK6026  
 Synorthocladius semivirens|BIOUG15964-F02|Kate Perez|BIN Taxonomy Match|BOLD:AAK6026  
 Synorthocladius semivirens|BIOUG16596-F02|Kate Perez|BIN Taxonomy Match|BOLD:AAK6026  
 Synorthocladius semivirens|BIOUG16299-H07|Kate Perez|BIN Taxonomy Match|BOLD:AAK6026  
 Synorthocladius semivirens|BIOUG16434-C06|Kate Perez|BIN Taxonomy Match|BOLD:AAK6026  
 Synorthocladius semivirens|BIOUG16328-H08|Kate Perez|BIN Taxonomy Match|BOLD:AAK6026  
 Synorthocladius semivirens|BIOUG16529-D10|Kate Perez|BIN Taxonomy Match|BOLD:AAK6026  
 Chironomidae|BIOUG55148-C02|Renee Miskie|BIN Taxonomy Match (Jan 2021)|BOLD:ADZ8727  
 Chironomidae|BIOUG07418-F08|Meredith Miller|Tree-based Identification (Feb 2019)  
 Synorthocladius semivirens|Finmark825|Elisabeth Stur|BOLD:ACM5930  
 Synorthocladius semivirens|Finmark827|Elisabeth Stur|BOLD:ACM5930  
 Synorthocladius semivirens|Finmark831|Elisabeth Stur|BOLD:ACM5930  
 Synorthocladius semivirens|Finmark824|Elisabeth Stur|BOLD:ACM5930  
 Synorthocladius semivirens|Finmark810|Elisabeth Stur|BOLD:ACM5930  
 Synorthocladius semivirens|Finmark267|Elisabeth Stur|BOLD:ACM5930  
 Cricotopus triannulatus|BIOUG55112-F11|Kate Perez|BIN Taxonomy Match (Oct 2020)|BOLD:ACR...  
 Cricotopus triannulatus|NHRS-BYWS000000570|Yngve Brodin|morphology|BOLD:ACR4519  
 Cricotopus triannulatus|NHRS-BYWS000000486|Yngve Brodin|morphology|BOLD:ACR4519  
 Cricotopus triannulatus|NHRS-BYWS000000322|Yngve Brodin|morphology|BOLD:ACR4519  
 Cricotopus triannulatus|NHRS-BYWS000000471|Yngve Brodin|morphology|BOLD:ACR4519  
 Cricotopus triannulatus|EJV-20110193|Lauri Paasivirta|BOLD:ACR4519  
 Cricotopus triannulatus|NHRS-BYWS000000163|Yngve Brodin|morphology|BOLD:ACR4519  
 Cricotopus triannulatus|ZMUO.024689|Lauri Paasivirta|BOLD:ACR4519  
 Cricotopus triannulatus|ES396|Elisabeth Stur|Morphology|BOLD:ACR4519

Cricotopus triannulatus|NHRS-BYWS00000163|Yngve Brodin|morphology|BOLD:ACR4519  
 Cricotopus triannulatus|ZMUO.024689|Lauri Paasivirta|BOLD:ACR4519  
 Cricotopus triannulatus|ES396|Elisabeth Stur|Morphology|BOLD:ACR4519  
 Cricotopus triannulatus|ZSM-DIP-33140-H06|Caroline Chimeno|BIN Taxonomy Match (Jan 2022)|BOLD:A...  
 Cricotopus triannulatus|BIOUG16620-G09|Kate Perez|BIN Taxonomy Match|BOLD:ACR4519  
 Cricotopus triannulatus|NHRS-BYWS000000948|Yngve Brodin|morphology|BOLD:ACR4519  
 Cricotopus triannulatus|NHRS-BYWS000000540|Yngve Brodin|morphology|BOLD:ACR4519  
 Cricotopus triannulatus|ZMUO.024688|Lauri Paasivirta|BOLD:ACR4519  
 Cricotopus triannulatus|EJV-20110191|Lauri Paasivirta|BOLD:ACR4519  
 Chironomidae|CCDB24038-F08|Jerome Moriniere|BIN Taxonomy Match|BOLD:ACU4522  
 Chironomidae|CCDB24037-A09|Jerome Moriniere|BIN Taxonomy Match|BOLD:ACU4522  
 Smittia pratorum|ZSM-DIP-33141-E03|Caroline Chimeno|BIN Taxonomy Match (Jan 2022)|BOLD:A...  
 Smittia pratorum|ZSM-DIP-33147-G12|Caroline Chimeno|BIN Taxonomy Match (Jan 2022)|BOLD:A...  
 Smittia pratorum|ZSM-DIP-33141-E02|Caroline Chimeno|BIN Taxonomy Match (Jan 2022)|BOLD:A...  
 Smittia pratorum|ZSM-DIP-33141-D12|Caroline Chimeno|BIN Taxonomy Match (Jan 2022)|BOLD:A...  
 Smittia pratorum|ZSM-DIP-33141-D11|Caroline Chimeno|BIN Taxonomy Match (Jan 2022)|BOLD:A...  
 Smittia pratorum|ZSM-DIP-33134-F07|Caroline Chimeno|BIN Taxonomy Match (Jan 2022)|BOLD:A...  
 Smittia pratorum|ZSM-DIP-33134-F09|Caroline Chimeno|BIN Taxonomy Match (Jan 2022)|BOLD:A...  
 Smittia pratorum|ZSM-DIP-33136-E04|Caroline Chimeno|BIN Taxonomy Match (Jan 2022)|BOLD:A...  
 Smittia pratorum|ZSM-DIP-33141-E01|Caroline Chimeno|BIN Taxonomy Match (Jan 2022)|BOLD:A...  
 Smittia pratorum|ZSM-DIP-33134-F08|Caroline Chimeno|BIN Taxonomy Match (Jan 2022)|BOLD:A...  
 Smittia pratorum|ZSM-DIP-33140-D09|Caroline Chimeno|BIN Taxonomy Match (Jan 2022)|BOLD:A...  
 Smittia pratorum|TRD-CH48|Elisabeth Stur|morphology|BOLD:ACM5388  
 Smittia sp. 8ES|BIOUG16734-F04|Kate Perez|BIN Taxonomy Match|BOLD:ACP4736  
 Smittia sp. 8ES|BIOUG16855-C04|Kate Perez|BIN Taxonomy Match|BOLD:ACP4736  
 Smittia sp. 8ES|BIOUG16859-F12|Kate Perez|BIN Taxonomy Match|BOLD:ACP4736  
 Smittia|BIOUG42961-B12|Kate Perez|BIN Taxonomy Match below Phylum (Jun 2019)|BOLD:ACP4736  
 Smittia sp. 8ES|BIOUG17444-B04|Kate Perez|BIN Taxonomy Match|BOLD:ACP4736  
 Smittia|BIOUG43078-H02|Kate Perez|BIN Taxonomy Match below Phylum (Jun 2019)|BOLD:ACP4736  
 Smittia|BIOUG43077-B09|Kate Perez|BIN Taxonomy Match below Phylum (Jun 2019)|BOLD:ACP4736  
 Smittia sp. 8ES|BIOUG16351-E10|Kate Perez|BIN Taxonomy Match|BOLD:ACP4736  
 Smittia sp. 8ES|BIOUG15648-F08|Kate Perez|BIN Taxonomy Match|BOLD:ACP4736  
 Smittia sp. 8ES|BIOUG15649-F08|Kate Perez|BIN Taxonomy Match|BOLD:ACP4736  
 Smittia|BIOUG43077-D10|Kate Perez|BIN Taxonomy Match below Phylum (Jun 2019)|BOLD:ACP4736  
 Smittia|BIOUG43083-D07|Kate Perez|BIN Taxonomy Match below Phylum (May 2019)|BOLD:ACP4736  
 Smittia|BIOUG43074-F05|Kate Perez|BIN Taxonomy Match below Phylum (Jun 2019)|BOLD:ACP4736  
 Smittia sp. 8ES|BIOUG05144-A08|Kate Perez|BIN Taxonomy Match|BOLD:ACP4736  
 Smittia sp. 8ES|BIOUG17022-E02|Kate Perez|BIN Taxonomy Match|BOLD:ACP4736  
 Smittia sp. 8ES|BIOUG16358-A08|Kate Perez|BIN Taxonomy Match|BOLD:ACP4736  
 Smittia sp. 8ES|BIOUG17064-A12|Kate Perez|BIN Taxonomy Match|BOLD:ACP4736  
 Smittia sp. 8ES|BIOUG17064-C10|Kate Perez|BIN Taxonomy Match|BOLD:ACP4736  
 Smittia sp. 8ES|BIOUG17064-G12|Kate Perez|BIN Taxonomy Match|BOLD:ACP4736  
 Smittia sp. 8ES|BIOUG17025-F02|Kate Perez|BIN Taxonomy Match|BOLD:ACP4736  
 Smittia sp. 8ES|BIOUG17064-B10|Kate Perez|BIN Taxonomy Match|BOLD:ACP4736  
 Smittia|BIOUG36841-D09|Kate Perez|BIN Taxonomy Match (Jul 2018)|BOLD:ACP4736  
 Smittia sp. 8ES|BIOUG16713-D06|Kate Perez|BIN Taxonomy Match|BOLD:ACP4736  
 Smittia sp. 8ES|BIOUG16480-C11|Kate Perez|BIN Taxonomy Match|BOLD:ACP4736  
 Smittia|BIOUG42972-C06|Kate Perez|BIN Taxonomy Match below Phylum (Jun 2019)|BOLD:ACP4736  
 Smittia sp. 8ES|BIOUG16479-F08|Kate Perez|BIN Taxonomy Match|BOLD:ACP4736  
 Smittia sp. 8ES|BIOUG16431-C05|Kate Perez|BIN Taxonomy Match|BOLD:ACP4736  
 Smittia sp. 8ES|BIOUG15807-E06|Kate Perez|BIN Taxonomy Match|BOLD:ACP4736  
 Smittia sp. 8ES|BIOUG17064-F07|Kate Perez|BIN Taxonomy Match|BOLD:ACP4736  
 Smittia sp. 8ES|BIOUG17065-B02|Kate Perez|BIN Taxonomy Match|BOLD:ACP4736  
 Smittia sp. 8ES|BIOUG17066-A12|Kate Perez|BIN Taxonomy Match|BOLD:ACP4736  
 Smittia sp. 8ES|BIOUG16360-G09|Kate Perez|BIN Taxonomy Match|BOLD:ACP4736  
 Smittia sp. 8ES|BIOUG16351-F05|Kate Perez|BIN Taxonomy Match|BOLD:ACP4736  
 Smittia sp. 8ES|BIOUG16736-H06|Kate Perez|BIN Taxonomy Match|BOLD:ACP4736  
 Smittia|BIOUG36776-E08|Kate Perez|BIN Taxonomy Match (Jul 2018)|BOLD:ACP4736  
 Smittia|BIOUG36932-E12|Kate Perez|BIN Taxonomy Match (Jul 2018)|BOLD:ACP4736  
 Smittia|BIOUG36992-H05|Kate Perez|BIN Taxonomy Match (Jul 2018)|BOLD:ACP4736  
 Smittia sp. 8ES|BIOUG16707-C06|Kate Perez|BIN Taxonomy Match|BOLD:ACP4736  
 Smittia sp. 8ES|BIOUG15949-H11|Kate Perez|BIN Taxonomy Match|BOLD:ACP4736  
 Smittia sp. 8ES|BIOUG15809-C01|Kate Perez|BIN Taxonomy Match|BOLD:ACP4736  
 Smittia sp. 8ES|BIOUG17094-B04|Kate Perez|BIN Taxonomy Match|BOLD:ACP4736  
 Smittia sp. 8ES|BIOUG16736-C04|Kate Perez|BIN Taxonomy Match|BOLD:ACP4736  
 Smittia sp. 8ES|BIOUG16778-E02|Kate Perez|BIN Taxonomy Match|BOLD:ACP4736  
 Smittia sp. 8ES|BIOUG17064-F09|Kate Perez|BIN Taxonomy Match|BOLD:ACP4736  
 Smittia sp. 8ES|BIOUG16779-C01|Kate Perez|BIN Taxonomy Match|BOLD:ACP4736  
 Smittia sp. 8ES|BIOUG16705-B11|Kate Perez|BIN Taxonomy Match|BOLD:ACP4736  
 Smittia sp. 8ES|BIOUG15456-C10|Kate Perez|BIN Taxonomy Match|BOLD:ACP4736  
 Smittia sp. 8ES|BIOUG17095-H09|Kate Perez|BIN Taxonomy Match|BOLD:ACP4736  
 Smittia sp. 8ES|BIOUG04212-F07|Kate Perez|BIN Taxonomy Match|BOLD:ACP4736  
 Smittia sp. 8ES|BIOUG16705-D07|Kate Perez|BIN Taxonomy Match|BOLD:ACP4736  
 Smittia sp. 8ES|BIOUG06062-C02|Kate Perez|BIN Taxonomy Match|BOLD:ACP4736  
 Smittia sp. 8ES|BIOUG04089-E12|Kate Perez|BIN Taxonomy Match|BOLD:ACP4736  
 Smittia sp. 8ES|BIOUG04362-C04|Kate Perez|BIN Taxonomy Match|BOLD:ACP4736  
 Smittia|BIOUG42961-G06|Kate Perez|BIN Taxonomy Match below Phylum (Jun 2019)|BOLD:ACP4736  
 Smittia|BIOUG42961-C05|Kate Perez|BIN Taxonomy Match below Phylum (Jun 2019)|BOLD:ACP4736  
 Smittia|BIOUG42963-A02|Kate Perez|BIN Taxonomy Match below Phylum (Jun 2019)|BOLD:ACP4736  
 Smittia|BIOUG42962-B10|Kate Perez|BIN Taxonomy Match below Phylum (Jun 2019)|BOLD:ACP4736  
 Smittia|BIOUG43077-F05|Kate Perez|BIN Taxonomy Match below Phylum (Jun 2019)|BOLD:ACP4736  
 Smittia|BIOUG43077-E02|Kate Perez|BIN Taxonomy Match below Phylum (Jun 2019)|BOLD:ACP4736  
 Smittia|BIOUG43078-F02|Kate Perez|BIN Taxonomy Match below Phylum (Jun 2019)|BOLD:ACP4736  
 Smittia|BIOUG43078-E07|Kate Perez|BIN Taxonomy Match below Phylum (Jun 2019)|BOLD:ACP4736  
 Smittia|BIOUG55105-F06|Stefan Schmidt|BIN Taxonomy Match (Sep 2020)|BOLD:ACP4736  
 Smittia|BIOUG42940-G02|Kate Perez|BIN Taxonomy Match below Phylum (Jun 2019)|BOLD:ACP4736  
 Smittia|BIOUG42959-G09|Kate Perez|BIN Taxonomy Match below Phylum (Jun 2019)|BOLD:ACP4736  
 Smittia|BIOUG42959-F02|Kate Perez|BIN Taxonomy Match below Phylum (Jun 2019)|BOLD:ACP4736  
 Smittia|BIOUG42713-A12|Kate Perez|BIN Taxonomy Match below Phylum (Jun 2019)|BOLD:ACP4736  
 Smittia|BIOUG55103-A10|Stefan Schmidt|BIN Taxonomy Match (Sep 2020)|BOLD:ACP4736  
 Smittia|BIOUG42964-F02|Kate Perez|BIN Taxonomy Match below Phylum (Jun 2019)|BOLD:ACP4736  
 Smittia|BIOUG42963-D09|Kate Perez|BIN Taxonomy Match below Phylum (Jun 2019)|BOLD:ACP4736  
 Smittia|BIOUG42961-A08|Kate Perez|BIN Taxonomy Match below Phylum (Jun 2019)|BOLD:ACP4736  
 Smittia|BIOUG42961-G06|Kate Perez|BIN Taxonomy Match below Phylum (Jun 2019)|BOLD:ACP4736  
 Smittia|BIOUG42948-C01|Kate Perez|BIN Taxonomy Match below Phylum (Jun 2019)|BOLD:ACP4736  
 Smittia|BIOUG43074-E04|Kate Perez|BIN Taxonomy Match below Phylum (Jun 2019)|BOLD:ACP4736  
 Smittia|BIOUG43075-B05|Kate Perez|BIN Taxonomy Match below Phylum (Jun 2019)|BOLD:ACP4736  
 Smittia|BIOUG43075-E05|Kate Perez|BIN Taxonomy Match below Phylum (Jun 2019)|BOLD:ACP4736  
 Smittia|BIOUG43076-G04|Kate Perez|BIN Taxonomy Match below Phylum (Jun 2019)|BOLD:ACP4736  
 Smittia|BIOUG43079-A02|Kate Perez|BIN Taxonomy Match below Phylum (Jun 2019)|BOLD:ACP4736  
 Smittia|BIOUG43079-F12|Kate Perez|BIN Taxonomy Match below Phylum (Jun 2019)|BOLD:ACP4736  
 Smittia|BIOUG42960-E05|Kate Perez|BIN Taxonomy Match below Phylum (Jun 2019)|BOLD:ACP4736  
 Smittia|BIOUG42683-G05|Kate Perez|BIN Taxonomy Match below Phylum (Jun 2019)|BOLD:ACP4736

Smittia|BIOUG43079-F12|Kate Perez|BIN Taxonomy Match below Phylum (Jun 2019)|BOLD:ACP4736  
 Smittia|BIOUG42960-E05|Kate Perez|BIN Taxonomy Match below Phylum (Jun 2019)|BOLD:ACP4736  
 Smittia|BIOUG42683-G05|Kate Perez|BIN Taxonomy Match below Phylum (Jun 2019)|BOLD:ACP4736  
 Smittia|BIOUG43079-E10|Kate Perez|BIN Taxonomy Match below Phylum (Jun 2019)|BOLD:ACP4736  
 Smittia|BIOUG42712-B07|Kate Perez|BIN Taxonomy Match below Phylum (Jun 2019)|BOLD:ACP4736  
 Smittia|BIOUG43081-A03|Kate Perez|BIN Taxonomy Match below Phylum (Jun 2019)|BOLD:ACP4736  
 Smittia sp. 8ES|BIOUG16270-E11|Kate Perez|BIN Taxonomy Match|BOLD:ACP4736  
 Smittia sp. 8ES|BIOUG17065-A01|Kate Perez|BIN Taxonomy Match|BOLD:ACP4736  
 Smittia sp. 8ES|BIOUG04089-A05|Kate Perez|BIN Taxonomy Match|BOLD:ACP4736  
 Smittia|BIOUG43078-H10|Kate Perez|BIN Taxonomy Match below Phylum (Jun 2019)|BOLD:ACP4736  
 Smittia sp. 8ES|CH-eik09|Elisabeth Stur|BOLD:ACP4736  
 Smittia sp. 8ES|CH-eik123|Elisabeth Stur|BOLD:ACP4736  
 Smittia sp. 8ES|CH-eik08|Elisabeth Stur|BOLD:ACP4736  
 Smittia sp. 8ES|TRD-CH416|Elisabeth Stur|morphology|BOLD:ACP4736  
 Smittia sp. 8ES|BIOUG17096-A02|Kate Perez|BIN Taxonomy Match|BOLD:ACP4736  
 Smittia|BIOUG36818-E08|Kate Perez|BIN Taxonomy Match (Jul 2018)|BOLD:ACP4736  
 Smittia sp. 8ES|BIOUG16709-D08|Kate Perez|BIN Taxonomy Match|BOLD:ACP4736  
 Smittia|BIOUG36766-C10|Kate Perez|BIN Taxonomy Match (Jul 2018)|BOLD:ACP4736  
 Smittia sp. 8ES|BIOUG16736-G11|Kate Perez|BIN Taxonomy Match|BOLD:ACP4736  
 Smittia sp. 8ES|BIOUG17064-D04|Kate Perez|BIN Taxonomy Match|BOLD:ACP4736  
 Smittia sp. 8ES|BIOUG17064-E11|Kate Perez|BIN Taxonomy Match|BOLD:ACP4736  
 Smittia sp. 8ES|BIOUG17064-F10|Kate Perez|BIN Taxonomy Match|BOLD:ACP4736  
 Smittia sp. 8ES|BIOUG15674-G07|Kate Perez|BIN Taxonomy Match|BOLD:ACP4736  
 Smittia sp. 8ES|BIOUG17065-B03|Kate Perez|BIN Taxonomy Match|BOLD:ACP4736  
 Smittia sp. 8ES|BIOUG16712-D04|Kate Perez|BIN Taxonomy Match|BOLD:ACP4736  
 Smittia sp. 8ES|BIOUG16705-C09|Kate Perez|BIN Taxonomy Match|BOLD:ACP4736  
 Smittia sp. 8ES|BIOUG36680-H02|Kate Perez|BIN Taxonomy Match (May 2018)|BOLD:ACP4736  
 Smittia sp. 8ES|BIOUG17064-C01|Kate Perez|BIN Taxonomy Match|BOLD:ACP4736  
 Smittia sp. 8ES|BIOUG36601-B02|Kate Perez|BIN Taxonomy Match (May 2018)|BOLD:ACP4736  
 Smittia sp. 8ES|BIOUG16434-G11|Kate Perez|BIN Taxonomy Match|BOLD:ACP4736  
 Smittia sp. 8ES|BIOUG36684-F02|Kate Perez|BIN Taxonomy Match (May 2018)|BOLD:ACP4736  
 Smittia|BIOUG43081-E12|Kate Perez|BIN Taxonomy Match below Phylum (Jun 2019)|BOLD:ACP4736  
 Smittia sp. 8ES|BIOUG16706-E06|Kate Perez|BIN Taxonomy Match|BOLD:ACP4736  
 Smittia sp. 8ES|BIOUG16706-H10|Kate Perez|BIN Taxonomy Match|BOLD:ACP4736  
 Smittia|BIOUG36828-D08|Kate Perez|BIN Taxonomy Match (Jul 2018)|BOLD:ACP4736  
 Smittia|BIOUG36827-F12|Kate Perez|BIN Taxonomy Match (Jul 2018)|BOLD:ACP4736  
 Smittia sp. 8ES|BIOUG16278-D08|Kate Perez|BIN Taxonomy Match|BOLD:ACP4736  
 Smittia sp. 8ES|BIOUG16480-F05|Kate Perez|BIN Taxonomy Match|BOLD:ACP4736  
 Smittia sp. 8ES|BIOUG16630-H10|Kate Perez|BIN Taxonomy Match|BOLD:ACP4736  
 Smittia sp. 8ES|BIOUG16708-C11|Kate Perez|BIN Taxonomy Match|BOLD:ACP4736  
 Smittia|BIOUG16712-G04|Kate Perez|Tree based identification  
 Smittia sp. 8ES|BIOUG15648-F10|Kate Perez|BIN Taxonomy Match|BOLD:ACP4736  
 Smittia|BIOUG36761-E09|Kate Perez|BIN Taxonomy Match (Jul 2018)|BOLD:ACP4736  
 Smittia sp. 8ES|CH-OSF85|Elisabeth Stur|BOLD:ACP4736  
 Smittia sp. 8ES|BIOUG15792-E03|Kate Perez|BIN Taxonomy Match|BOLD:ACP4736  
 Smittia sp. 8ES|BIOUG16332-F02|Kate Perez|BIN Taxonomy Match|BOLD:ACP4736  
 Smittia sp. 8ES|BIOUG15465-E06|Kate Perez|BIN Taxonomy Match|BOLD:ACP4736  
 Smittia sp. 8ES|BIOUG04795-B09|Kate Perez|BIN Taxonomy Match|BOLD:ACP4736  
 Smittia sp. 8ES|BIOUG15949-C07|Kate Perez|BIN Taxonomy Match|BOLD:ACP4736  
 Smittia sp. 8ES|BIOUG15763-F05|Kate Perez|BIN Taxonomy Match|BOLD:ACP4736  
 Parakiefferiella|ZSM34341-H03|Sofia Wiedenbrug|BOLD:ACU4227  
 Parakiefferiella|CCDB24228-H05|Sofia Wiedenbrug|BIN Taxonomy Match|BOLD:ACU4227  
 Smittia|BIOUG15793-E06|Kate Perez|BIN Taxonomy Match|BOLD:AAM7066  
 Smittia|BIOUG15806-B08|Kate Perez|BIN Taxonomy Match|BOLD:AAM7066  
 Smittia|BIOUG15718-H10|Kate Perez|BIN Taxonomy Match|BOLD:AAM7066  
 Smittia|BIOUG15456-E04|Kate Perez|BIN Taxonomy Match|BOLD:AAM7066  
 Smittia|BIOUG15463-H02|Kate Perez|BIN Taxonomy Match|BOLD:AAM7066  
 Smittia|BIOUG15654-B01|Kate Perez|BIN Taxonomy Match|BOLD:AAM7066  
 Smittia|BIOUG15457-B07|Kate Perez|BIN Taxonomy Match|BOLD:AAM7066  
 Smittia|BIOUG15648-E09|Kate Perez|BIN Taxonomy Match|BOLD:AAM7066  
 Smittia|BIOUG16476-D03|Kate Perez|BIN Taxonomy Match|BOLD:AAM7066  
 Smittia|BIOUG16435-C06|Kate Perez|BIN Taxonomy Match|BOLD:AAM7066  
 Smittia|BIOUG15537-A08|Kate Perez|BIN Taxonomy Match|BOLD:AAM7066  
 Smittia|BIOUG16436-F09|Kate Perez|BIN Taxonomy Match|BOLD:AAM7066  
 Smittia|BIOUG16435-C07|Kate Perez|BIN Taxonomy Match|BOLD:AAM7066  
 Smittia sp. 19ES|Finmark08|Elisabeth Stur|BOLD:AAM7066  
 Smittia sp. 19ES|CH-eik92|Elisabeth Stur|BOLD:AAM7066  
 Smittia|BIOUG16551-F07|Kate Perez|BIN Taxonomy Match|BOLD:AAM7066  
 Smittia|BIOUG16476-B02|Kate Perez|BIN Taxonomy Match|BOLD:AAM7066  
 Smittia|BIOUG16479-A10|Kate Perez|BIN Taxonomy Match|BOLD:AAM7066  
 Smittia|BIOUG15562-H02|Kate Perez|BIN Taxonomy Match|BOLD:AAM7066  
 Smittia|BIOUG15542-B12|Kate Perez|BIN Taxonomy Match|BOLD:AAM7066  
 Smittia|BIOUG15948-E05|Kate Perez|BIN Taxonomy Match|BOLD:AAM7066  
 Smittia|BIOUG15459-B06|Kate Perez|BIN Taxonomy Match|BOLD:AAM7066  
 Smittia|BIOUG15543-G10|Kate Perez|BIN Taxonomy Match|BOLD:AAM7066  
 Smittia|BIOUG15806-G04|Kate Perez|BIN Taxonomy Match|BOLD:AAM7066  
 Smittia|BIOUG16432-B07|Kate Perez|BIN Taxonomy Match|BOLD:AAM7066  
 Smittia|BIOUG15565-E07|Kate Perez|BIN Taxonomy Match|BOLD:AAM7066  
 Smittia|BIOUG15454-D08|Kate Perez|BIN Taxonomy Match|BOLD:AAM7066  
 Smittia|BIOUG15183-A03|Kate Perez|BIN Taxonomy Match|BOLD:AAM7066  
 Smittia|BIOUG16476-B03|Kate Perez|BIN Taxonomy Match|BOLD:AAM7066  
 Smittia|BIOUG16597-A04|Kate Perez|BIN Taxonomy Match|BOLD:AAM7066  
 Smittia|BIOUG15562-E01|Kate Perez|BIN Taxonomy Match|BOLD:AAM7066  
 Smittia|BIOUG15540-F01|Kate Perez|BIN Taxonomy Match|BOLD:AAM7066  
 Smittia|BIOUG15541-D01|Kate Perez|BIN Taxonomy Match|BOLD:AAM7066  
 Smittia|BIOUG16434-E11|Kate Perez|BIN Taxonomy Match|BOLD:AAM7066  
 Smittia|BIOUG15951-G05|Kate Perez|BIN Taxonomy Match|BOLD:AAM7066  
 Smittia|BIOUG15795-G02|Kate Perez|BIN Taxonomy Match|BOLD:AAM7066  
 Smittia|BIOUG15561-D10|Kate Perez|BIN Taxonomy Match|BOLD:AAM7066  
 Smittia|BIOUG15965-C01|Kate Perez|BIN Taxonomy Match|BOLD:AAM7066  
 Smittia pratorum|ZMUO.024592|Lauri Paasivirta|BOLD:AAM7066  
 Smittia|BIOUG15763-C11|Kate Perez|BIN Taxonomy Match|BOLD:AAM7066  
 Metriocnemus sp. 9ES|TRD-CH255|Elisabeth Stur|morphology|BOLD:ACM4800  
 Metriocnemus sp. 9ES|TRD-CH246|Elisabeth Stur|morphology|BOLD:ACM4800  
 Metriocnemus sp. 9ES|TRD-CH435|Elisabeth Stur|morphology|BOLD:ACM4800  
 Metriocnemus sp. 9ES|TRD-CH53|Elisabeth Stur|morphology|BOLD:ACM4800  
 Cricotopus similis|BIOUG15949-E01|Elisabeth Stur|BIN Taxonomy Match|BOLD:ACP9613  
 Cricotopus similis|BIOUG16997-D11|Mikko Penttinsaari|BIN Taxonomy Match (Jan 2022)|BOLD:A...  
 Cricotopus similis|BIOUG17099-H11|Mikko Penttinsaari|BIN Taxonomy Match (Jan 2022)|BOLD:A...  
 Cricotopus similis|BIOUG16625-H04|Elisabeth Stur|BIN Taxonomy Match|BOLD:ACP9613  
 Cricotopus similis|BIOUG16476-B11|Elisabeth Stur|BIN Taxonomy Match|BOLD:ACP9613  
 Cricotopus similis|BIOUG16198-A01|Elisabeth Stur|BIN Taxonomy Match|BOLD:ACP9613  
 Cricotopus similis|BIOUG16198-A01|Elisabeth Stur|BIN Taxonomy Match|BOLD:ACP9613







Cricotopus similis|BIOUG16434-C04|Elisabeth Stur|BIN Taxonomy Match|BOLD:ACP9613  
 Cricotopus similis|BIOUG16594-F04|Elisabeth Stur|BIN Taxonomy Match|BOLD:ACP9613  
 Cricotopus similis|BIOUG15967-E02|Elisabeth Stur|BIN Taxonomy Match|BOLD:ACP9613  
 Cricotopus similis|BIOUG15967-D09|Elisabeth Stur|BIN Taxonomy Match|BOLD:ACP9613  
 Cricotopus similis|BIOUG15965-H05|Elisabeth Stur|BIN Taxonomy Match|BOLD:ACP9613  
 Cricotopus similis|BIOUG15965-F10|Elisabeth Stur|BIN Taxonomy Match|BOLD:ACP9613  
 Cricotopus similis|BIOUG15964-F06|Elisabeth Stur|BIN Taxonomy Match|BOLD:ACP9613  
 Cricotopus similis|BIOUG16552-H11|Elisabeth Stur|BIN Taxonomy Match|BOLD:ACP9613  
 Cricotopus similis|BIOUG15905-F10|Elisabeth Stur|BIN Taxonomy Match|BOLD:ACP9613  
 Cricotopus similis|BIOUG16299-D02|Elisabeth Stur|BIN Taxonomy Match|BOLD:ACP9613  
 Cricotopus similis|BIOUG16257-B10|Elisabeth Stur|BIN Taxonomy Match|BOLD:ACP9613  
 Cricotopus similis|BIOUG16551-H04|Elisabeth Stur|BIN Taxonomy Match|BOLD:ACP9613  
 Cricotopus similis|BIOUG16198-H08|Elisabeth Stur|BIN Taxonomy Match|BOLD:ACP9613  
 Cricotopus similis|BIOUG16198-D02|Elisabeth Stur|BIN Taxonomy Match|BOLD:ACP9613  
 Cricotopus similis|BIOUG15967-H06|Elisabeth Stur|BIN Taxonomy Match|BOLD:ACP9613  
 Cricotopus similis|BIOUG15967-F10|Elisabeth Stur|BIN Taxonomy Match|BOLD:ACP9613  
 Cricotopus similis|BIOUG15967-F06|Elisabeth Stur|BIN Taxonomy Match|BOLD:ACP9613  
 Cricotopus similis|BIOUG15967-F01|Elisabeth Stur|BIN Taxonomy Match|BOLD:ACP9613  
 Cricotopus similis|BIOUG15966-G05|Elisabeth Stur|BIN Taxonomy Match|BOLD:ACP9613  
 Cricotopus similis|BIOUG15966-D08|Elisabeth Stur|BIN Taxonomy Match|BOLD:ACP9613  
 Cricotopus similis|BIOUG15966-C03|Elisabeth Stur|BIN Taxonomy Match|BOLD:ACP9613  
 Cricotopus similis|BIOUG16331-C03|Elisabeth Stur|BIN Taxonomy Match|BOLD:ACP9613  
 Cricotopus similis|BIOUG15964-D05|Elisabeth Stur|BIN Taxonomy Match|BOLD:ACP9613  
 Cricotopus similis|BIOUG16396-D09|Elisabeth Stur|BIN Taxonomy Match|BOLD:ACP9613  
 Cricotopus similis|BIOUG15954-H03|Elisabeth Stur|BIN Taxonomy Match|BOLD:ACP9613  
 Cricotopus similis|BIOUG15954-A02|Elisabeth Stur|BIN Taxonomy Match|BOLD:ACP9613  
 Cricotopus similis|BIOUG15949-F12|Elisabeth Stur|BIN Taxonomy Match|BOLD:ACP9613  
 Cricotopus similis|BIOUG15949-F02|Elisabeth Stur|BIN Taxonomy Match|BOLD:ACP9613  
 Cricotopus similis|BIOUG15949-E12|Elisabeth Stur|BIN Taxonomy Match|BOLD:ACP9613  
 Cricotopus similis|BIOUG15967-C07|Elisabeth Stur|BIN Taxonomy Match|BOLD:ACP9613  
 Cricotopus similis|BIOUG15948-C10|Elisabeth Stur|BIN Taxonomy Match|BOLD:ACP9613  
 Cricotopus similis|BIOUG15948-A12|Elisabeth Stur|BIN Taxonomy Match|BOLD:ACP9613  
 Cricotopus similis|BIOUG15948-A11|Elisabeth Stur|BIN Taxonomy Match|BOLD:ACP9613  
 Cricotopus similis|BIOUG15947-F02|Elisabeth Stur|BIN Taxonomy Match|BOLD:ACP9613  
 Cricotopus similis|BIOUG15947-E03|Elisabeth Stur|BIN Taxonomy Match|BOLD:ACP9613  
 Cricotopus similis|BIOUG15947-D04|Elisabeth Stur|BIN Taxonomy Match|BOLD:ACP9613  
 Cricotopus similis|BIOUG15947-C09|Elisabeth Stur|BIN Taxonomy Match|BOLD:ACP9613  
 Cricotopus similis|BIOUG15947-B02|Elisabeth Stur|BIN Taxonomy Match|BOLD:ACP9613  
 Cricotopus similis|BIOUG15905-H05|Elisabeth Stur|BIN Taxonomy Match|BOLD:ACP9613  
 Cricotopus similis|BIOUG15905-E07|Elisabeth Stur|BIN Taxonomy Match|BOLD:ACP9613  
 Cricotopus similis|BIOUG15905-B06|Elisabeth Stur|BIN Taxonomy Match|BOLD:ACP9613  
 Cricotopus similis|BIOUG16330-D04|Elisabeth Stur|BIN Taxonomy Match|BOLD:ACP9613

Eurycnemus crassipes|ZMUO.026237|Lauri Paasivirta|BOLD:ADF0328

Eurycnemus crassipes|ZMUO.026236|Lauri Paasivirta|BOLD:ADF0328

Tanytarsus lestagei|KY225360

Brillia flavifrons|014421591|Jason Doe|BOLD:AAV0728  
 Brillia longifurca|ZMUO.024709|Lauri Paasivirta|BOLD:AAV0728  
 Brillia longifurca|ZMUO.024708|Lauri Paasivirta|BOLD:AAV0728  
 Brillia longifurca|TRD-CH368|Elisabeth Stur|morphology|BOLD:AAV0728  
 Brillia longifurca|CH-OSF99|Elisabeth Stur|BOLD:AAV0728  
 Brillia longifurca|ATNA565|Elisabeth Stur|BOLD:AAV0728  
 Brillia longifurca|CH-OSF15|Elisabeth Stur|BOLD:AAV0728  
 Brillia longifurca|Finmark352|Elisabeth Stur|BOLD:AAV0728

Brillia bifida|CCDB21606-G11|Sofia Wiedenbrug|BOLD:AAD7726  
 Brillia bifida|CCDB21606-B12|Sofia Wiedenbrug|BOLD:AAD7726  
 Brillia bifida|CCDB21606-A06|Sofia Wiedenbrug|BOLD:AAD7726  
 Brillia bifida|BC-ZSM-DIP-22488-F06|Dieter Doczkal|BOLD:AAD7726  
 Brillia bifida|BC-ZSM-DIP-22488-C06|Dieter Doczkal|BOLD:AAD7726  
 Brillia bifida|CCDB24228-C08|Sofia Wiedenbrug|BIN Taxonomy Match|BOLD:AAD7726  
 Brillia bifida|ES186|Elisabeth Stur|BOLD:AAD7726

Brillia bifida|ES181|Elisabeth Stur|BOLD:AAD7725

Brillia bifida|ZMUO.024697|Lauri Paasivirta|BOLD:AAD7724  
 Brillia bifida|ZSM-DIP-33148-F07|Caroline Chimeno|BIN Taxonomy Match (Jan 2022)|BOLD:AAD...  
 Brillia bifida|ZSM-DIP-33128-F04|Caroline Chimeno|BIN Taxonomy Match (Jan 2022)|BOLD:AAD...  
 Brillia bifida|ZSM-DIP-33129-E10|Caroline Chimeno|BIN Taxonomy Match (Jan 2022)|BOLD:AAD...  
 Brillia bifida|ZSM-DIP-33145-H10|Caroline Chimeno|BIN Taxonomy Match (Jan 2022)|BOLD:AAD...  
 Brillia bifida|CH-OSF01|Elisabeth Stur|BOLD:AAD7724  
 Brillia bifida|ZMUO.024696|Lauri Paasivirta|BOLD:AAD7724  
 Brillia bifida|TRD-CH69|Elisabeth Stur|BOLD:AAD7724  
 Brillia bifida|ATNA310|Elisabeth Stur|BOLD:AAD7724  
 Brillia bifida|ATNA311|Elisabeth Stur|BOLD:AAD7724  
 Brillia bifida|BIOUG43948-E03|Kate Perez|BIN Taxonomy Match below Phylum (Jan 2019)|BOLD ...  
 Brillia bifida|TRD-CH297|Elisabeth Stur|BOLD:AAD7724  
 Brillia bifida|TRD-CH68|Elisabeth Stur|BOLD:AAD7724  
 Brillia bifida|ZSM-DIP-33129-E02|Caroline Chimeno|BIN Taxonomy Match (Jan 2022)|BOLD:AAD...  
 Brillia bifida|ZSM-DIP-33146-E06|Caroline Chimeno|BIN Taxonomy Match (Jan 2022)|BOLD:AAD...  
 Brillia bifida|ES92|Elisabeth Stur|BOLD:AAD7724  
 Brillia bifida|ES89|Elisabeth Stur|BOLD:AAD7724  
 Brillia bifida|Finmark66|Elisabeth Stur|BOLD:AAD7724  
 Brillia bifida|Finmark158|Elisabeth Stur|BOLD:AAD7724  
 Brillia bifida|Finmark310|Elisabeth Stur|BOLD:AAD7724

Thienemanniella|CCDB24229-A01|Sofia Wiedenbrug|BIN Taxonomy Match|BOLD:ACU4481

Thienemanniella|CCDB21605-G11|Sofia Wiedenbrug|BOLD:ACT1182

Thienemanniella|ZSM-DIP-33172-E03|Caroline Chimeno|BIN Taxonomy Match (Jan 2022)|BOLD:AC...

Thienemanniella|CCDB21605-G10|Sofia Wiedenbrug|BOLD:ACT1182

Thienemanniella sp. 1TE|ATNA235|Torbjorn Ekrem|BOLD:AAG1616

Thienemanniella sp. 1TE|EBAI-Ch015|Elisabeth Stur|morphology|BOLD:AAG1616

Thienemanniella sp. 1TE|ATNA368|Torbjorn Ekrem|BOLD:AAG1616

Thienemanniella sp. 1TE|ATNA364|Torbjorn Ekrem|BOLD:AAG1616

Thienemanniella sp. 1TE|Finmark848|Elisabeth Stur|BOLD:AAG1616

Thienemanniella sp. 1TE|ATNA407|Torbjorn Ekrem|BOLD:AAG1616

Thienemanniella sp. 1TE|ATNA176|Torbjorn Ekrem|BOLD:AAG1616

Thienemanniella sp. 4TE|EBAI-Ch154|Elisabeth Stur|morphology|BOLD:ACX6105

Thienemanniella sp. 4TE|EBAI-Ch158|Elisabeth Stur|morphology|BOLD:ACX6105

Thienemanniella sp. 4TE|EBAI-Ch159|Elisabeth Stur|morphology|BOLD:ACX6105

Thienemanniella sp. 4TE|EBAI-Ch020|Elisabeth Stur|morphology|BOLD:ACX6105

Thienemanniella sp. 4TE|ATNA545|Elisabeth Stur|BOLD:ACX6105

Thienemanniella sp. 4TE|EBAI-Ch257|Elisabeth Stur|morphology|BOLD:ACX6105

Thienemanniella sp. 4TE|EBAI-Ch160|Elisabeth Stur|morphology|BOLD:ACX6105

Thienemanniella sp. 4TE|EBAI-Ch156|Elisabeth Stur|morphology|BOLD:ACX6105

Thienemanniella sp. 4TE|EBAI-Ch155|Elisabeth Stur|morphology|BOLD:ACX6105

Thienemanniella sp. 4TE|EBAI-Ch153|Elisabeth Stur|morphology|BOLD:ACX6105

Thienemanniella|ZMUO.024844|Lauri Paasivirta|BOLD:ADF0721

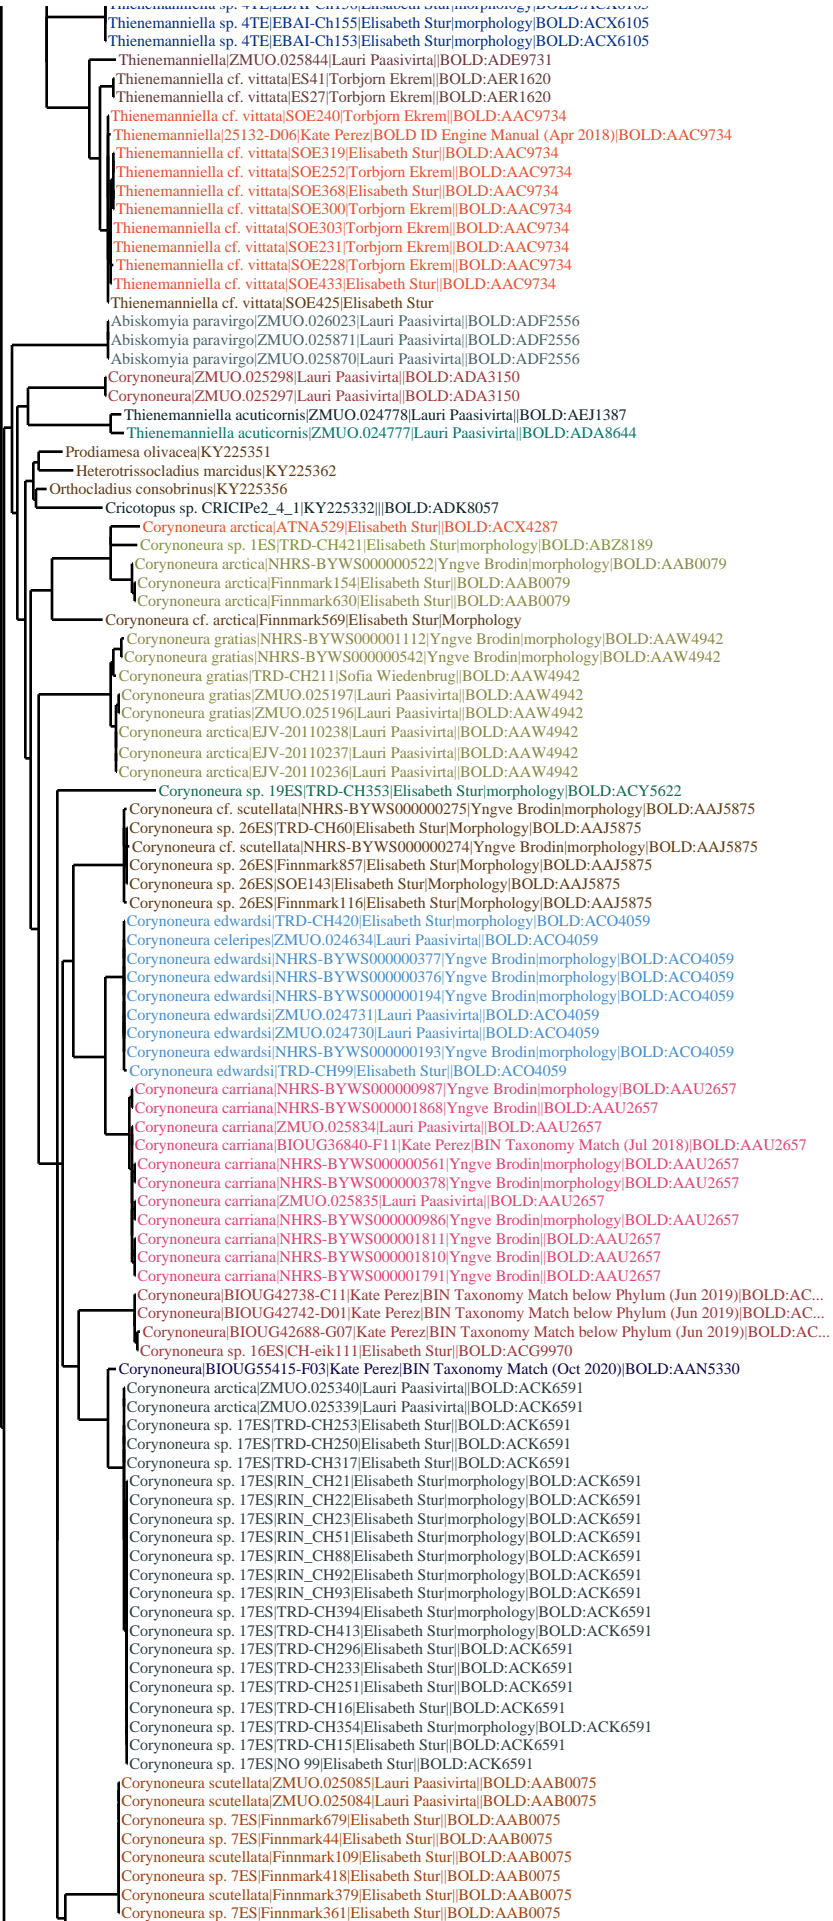

Corynoneura sp. 7ES|Finmark418|Elisabeth Stur|BOLD:AA80075  
 Corynoneura scutellata|Finmark379|Elisabeth Stur|BOLD:AA80075  
 Corynoneura sp. 7ES|Finmark361|Elisabeth Stur|BOLD:AA80075  
 Corynoneura|ZMUO.025875|Lauri Paasivirta|BOLD:ACY8182  
 Corynoneura sp. 8ES|Finmark284|Elisabeth Stur|BOLD:AAG5432  
 Thienemanniella|CCDB24229-G11|Sofia Wiedenbrug|BIN Taxonomy Match|BOLD:ACU4652  
 Thienemanniella|CCDB24229-G10|Sofia Wiedenbrug|BIN Taxonomy Match|BOLD:ACU4652  
 Thienemanniella caspersi|BIOUG08211-B04|Kate Perez|BIN Taxonomy Match|BOLD:AAG1617  
 Thienemanniella caspersi|EBAl-Ch025|Elisabeth Stur|morphology|BOLD:AAG1617  
 Thienemanniella caspersi|EBAl-Ch018|Elisabeth Stur|morphology|BOLD:AAG1617  
 Thienemanniella caspersi|ATNA549|Elisabeth Stur|BOLD:AAG1617  
 Thienemanniella caspersi|ATNA530|Elisabeth Stur|BOLD:AAG1617  
 Thienemanniella caspersi|NO19|Torbjorn Ekrem|BOLD:AAG1617  
 Thienemanniella caspersi|ATNA369|Elisabeth Stur|BOLD:AAG1617  
 Thienemanniella caspersi|EBAl-Ch029|Elisabeth Stur|morphology|BOLD:AAG1617  
 Thienemanniella caspersi|EBAl-Ch028|Elisabeth Stur|morphology|BOLD:AAG1617  
 Thienemanniella caspersi|EBAl-Ch027|Elisabeth Stur|morphology|BOLD:AAG1617  
 Thienemanniella caspersi|EBAl-Ch026|Elisabeth Stur|morphology|BOLD:AAG1617  
 Thienemanniella caspersi|EBAl-Ch024|Elisabeth Stur|morphology|BOLD:AAG1617  
 Thienemanniella caspersi|EBAl-Ch019|Elisabeth Stur|morphology|BOLD:AAG1617  
 Thienemanniella caspersi|EBAl-Ch017|Elisabeth Stur|morphology|BOLD:AAG1617  
 Thienemanniella caspersi|EBAl-Ch016|Elisabeth Stur|morphology|BOLD:AAG1617  
 Thienemanniella caspersi|EBAl-Ch157|Elisabeth Stur|morphology|BOLD:AAG1617  
 Thienemanniella caspersi|Finmark762|Elisabeth Stur|BOLD:AAG1617  
 Thienemanniella caspersi|Finmark758|Elisabeth Stur|BOLD:AAG1617  
 Thienemanniella caspersi|Finmark854|Elisabeth Stur|BOLD:AAG1617  
 Thienemanniella caspersi|Finmark853|Elisabeth Stur|BOLD:AAG1617  
 Corynoneurella paludosa|ZMUO.024876|Lauri Paasivirta|BOLD:AAV3049  
 Corynoneurella paludosa|ZMUO.024877|Lauri Paasivirta|BOLD:AAV3049  
 Corynoneurella paludosa|Finmark855|Elisabeth Stur|BOLD:AAV3049  
 Corynoneurella paludosa|Finmark856|Elisabeth Stur|BOLD:AAV3049  
 Corynoneurella paludosa|Finmark363|Elisabeth Stur|BOLD:AAV3049  
 Thienemanniella nr. vittata|ZMUO.025380|Lauri Paasivirta|BOLD:ACQ9002  
 Thienemanniella nr. vittata|ZMUO.025381|Lauri Paasivirta|BOLD:ACQ9002  
 Thienemanniella|BIOUG16399-C02|Kate Perez|BIN Taxonomy Match (Aug 2017)|BOLD:ACQ9002  
 Thienemanniella|BIOUG16552-A09|Kate Perez|BIN Taxonomy Match (Aug 2017)|BOLD:ACQ9002  
 Thienemanniella minuscula|ZMUO.024879|Lauri Paasivirta|BOLD:ADA5504  
 Thienemanniella minuscula|ZMUO.024878|Lauri Paasivirta|BOLD:ADA5504  
 Corynoneura cf. antennalis|NHRS-BYWS00000515|Yngve Brodin|morphology|BOLD:ADA5504  
 Corynoneura cf. antennalis|NHRS-BYWS00000514|Yngve Brodin|morphology|BOLD:ADA5504  
 Corynoneura|CCDB24183-A09|Sofia Wiedenbrug|Morphology|BOLD:ACI6306  
 Corynoneura|BIOUG07413-E09|Kate Perez|BIN Taxonomy Match|BOLD:ACI6306  
 Corynoneura sp. 6ES|SOE338|Elisabeth Stur|BOLD:AAI5883  
 Corynoneura sp. 21ES|BIOUG05149-A08|Sofia Wiedenbrug|Morphology|BOLD:AAI0860  
 Corynoneura sp. 21ES|BIOUG05149-A03|Sofia Wiedenbrug|Morphology|BOLD:AAI0860  
 Corynoneura sp. 21ES|BIOUG07944-H05|Sofia Wiedenbrug|Morphology|BOLD:AAI0860  
 Corynoneura sp. 21ES|SOE35|Elisabeth Stur|Morphology|BOLD:AAI0860  
 Corynoneura sp. 21ES|CCDB24183-E10|Sofia Wiedenbrug|Morphology|BOLD:AAI0860  
 Corynoneura sp. 21ES|CCDB24183-E11|Sofia Wiedenbrug|Morphology|BOLD:AAI0860  
 Corynoneura sp. 21ES|CCDB24183-F08|Sofia Wiedenbrug|Morphology|BOLD:AAI0860  
 Corynoneura sp. 21ES|SOE398|Elisabeth Stur|Morphology|BOLD:AAI0860  
 Corynoneura sp. 21ES|SOE440|Elisabeth Stur|Morphology|BOLD:AAI0860  
 Corynoneura sp. 23ES|SOE36|Elisabeth Stur|Morphology|BOLD:AAE9742  
 Corynoneura sp. 23ES|SOE34|Elisabeth Stur|Morphology|BOLD:AAE9742  
 Corynoneura sp. 23ES|SOE32|Elisabeth Stur|Morphology|BOLD:AAE9742  
 Corynoneura sp. 23ES|SOE30|Elisabeth Stur|Morphology|BOLD:AAE9742  
 Corynoneura fittkaui|ZMUO.024675|Lauri Paasivirta|BOLD:AAC1838  
 Corynoneura fittkaui|ZMUO.024846|Lauri Paasivirta|BOLD:AAC1838  
 Corynoneura fittkaui|ZMUO.024845|Lauri Paasivirta|BOLD:AAC1838  
 Corynoneura fittkaui|SOE416|Torbjorn Ekrem|BOLD:AAC1838  
 Corynoneura fittkaui|SOE408|Torbjorn Ekrem|BOLD:AAC1838  
 Corynoneura fittkaui|SOE417|Torbjorn Ekrem|BOLD:AAC1838  
 Corynoneura fittkaui|SOE26|Elisabeth Stur|BOLD:AAC1838  
 Corynoneura fittkaui|SOE160|Torbjorn Ekrem|BOLD:AAC1838  
 Corynoneura fittkaui|SOE169|Torbjorn Ekrem|BOLD:AAC1838  
 Corynoneura fittkaui|SOE256|Torbjorn Ekrem|BOLD:AAC1838  
 Corynoneura fittkaui|SOE400|Torbjorn Ekrem|BOLD:AAC1838  
 Corynoneura fittkaui|SOE307|Torbjorn Ekrem|BOLD:AAC1838  
 Corynoneura fittkaui|SOE208|Torbjorn Ekrem|BOLD:AAC1838  
 Corynoneura fittkaui|SOE246|Torbjorn Ekrem|BOLD:AAC1838  
 Corynoneura fittkaui|SOE415|Torbjorn Ekrem|BOLD:AAC1838  
 Corynoneura fittkaui|SOE401|Torbjorn Ekrem|BOLD:AAC1838  
 Corynoneura sp. 24ES|CCDB22605-B03|Sofia Wiedenbrug|Morphology|BOLD:ACG3525  
 Corynoneura sp. 24ES|BIOUG05946-G03|Sofia Wiedenbrug|Morphology|BOLD:ACG3525  
 Corynoneura|CCDB24228-E05|Sofia Wiedenbrug|BIN Taxonomy Match|BOLD:ACU4229  
 Corynoneura|CCDB24228-G01|Sofia Wiedenbrug|BIN Taxonomy Match|BOLD:ACU5217  
 Corynoneura|CCDB24228-E03|Sofia Wiedenbrug|BOLD:ACU4365  
 Corynoneura|BIOUG07759-A03|Kate Perez|BIN Taxonomy Match|BOLD:ACI8241  
 Corynoneura|BIOUG08369-G10|Kate Perez|BIN Taxonomy Match|BOLD:ACI8241  
 Corynoneura|BIOUG08098-B07|Kate Perez|BIN Taxonomy Match|BOLD:ACI8241  
 Corynoneura sp. 4ES|EBAl-Ch147|Elisabeth Stur|morphology|BOLD:AAI5887  
 Corynoneura sp. 4ES|EBAl-Ch021|Elisabeth Stur|morphology|BOLD:AAI5887  
 Corynoneura sp. 4ES|EBAl-Ch032|Elisabeth Stur|morphology|BOLD:AAI5887  
 Corynoneura sp. 4ES|EBAl-Ch023|Elisabeth Stur|morphology|BOLD:AAI5887  
 Corynoneura sp. 4ES|EBAl-Ch038|Elisabeth Stur|morphology|BOLD:AAI5887  
 Corynoneura sp. 4ES|EBAl-Ch031|Elisabeth Stur|morphology|BOLD:AAI5887  
 Corynoneura sp. 4ES|EBAl-Ch022|Elisabeth Stur|morphology|BOLD:AAI5887  
 Corynoneura sp. 4ES|ATNA366|Elisabeth Stur|BOLD:AAI5887  
 Corynoneura sp. 4ES|Finmark852|Elisabeth Stur|BOLD:AAI5887  
 Corynoneura sp. 4ES|Finmark413|Elisabeth Stur|BOLD:AAI5887  
 Corynoneura sp. 4ES|TRD-CH130|Elisabeth Stur|BOLD:AAI5887  
 Corynoneura sp. 4ES|EBAl-Ch036|Elisabeth Stur|morphology|BOLD:AAI5887  
 Corynoneura sp. 4ES|EBAl-Ch030|Elisabeth Stur|morphology|BOLD:AAI5887  
 Corynoneura sp. 4ES|Finmark620|Elisabeth Stur|BOLD:AAI5887  
 Corynoneura sp. 4ES|Finmark600|Elisabeth Stur|BOLD:AAI5887  
 Corynoneura lobata|ZMUO.024676|Lauri Paasivirta|BOLD:ADA8695  
 Corynoneura fittkaui|ZMUO.024674|Lauri Paasivirta|BOLD:ADA7216  
 Corynoneura sp. 25ES|ZSM-DIP-33143-F10|Caroline Chimenó|BIN Taxonomy Match (Jan 2022)|BOLD:ACT8698  
 Corynoneura sp. 25ES|CCDB22605-B05|Sofia Wiedenbrug|Morphology|BOLD:ACT8698  
 Corynoneura sp. 25ES|GBOL11544|Sofia Wiedenbrug|Morphology|BOLD:ACT8698  
 Corynoneura sp. 25ES|CCDB22605-B07|Sofia Wiedenbrug|Morphology|BOLD:ACT8698  
 Corynoneura sp. 25ES|CCDB22605-B06|Sofia Wiedenbrug|Morphology|BOLD:ACT8698  
 Corynoneura sp. 20ES|Finmark768|Elisabeth Stur|BOLD:ACD1670

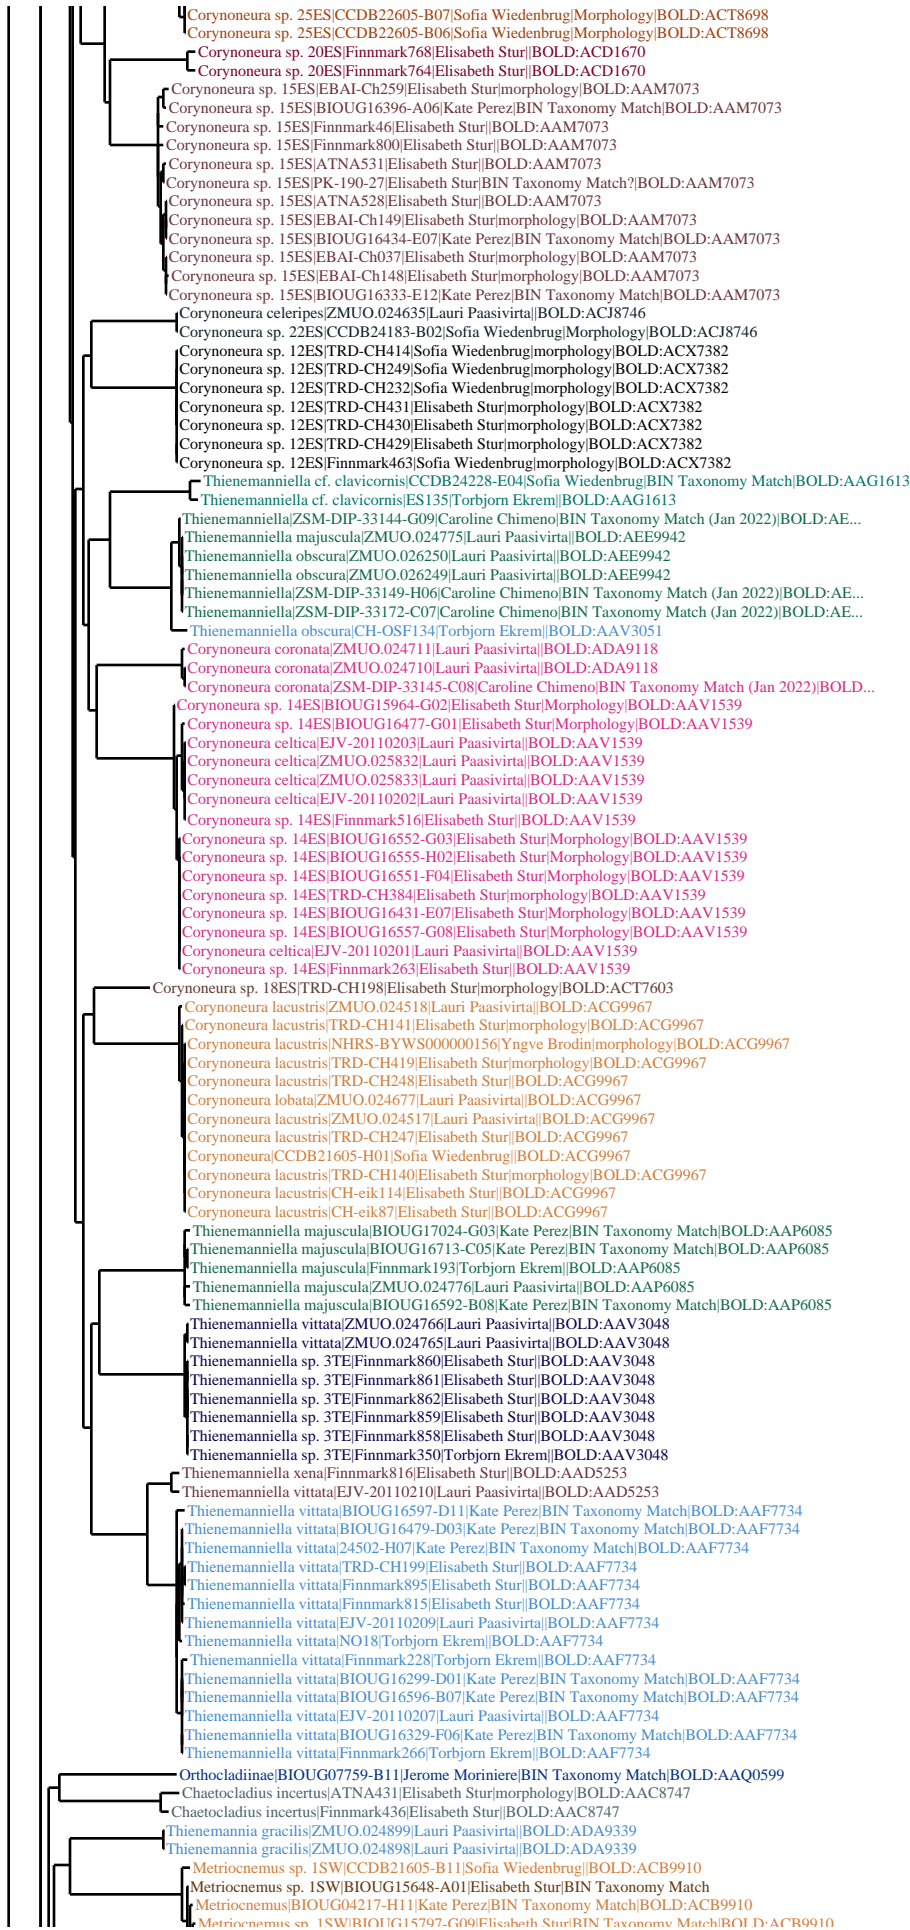

Metriocnemus sp. 1SW|BIOUG15648-A01|Elisabeth Stur|BIN Taxonomy Match  
 Metriocnemus|BIOUG04217-H11|Kate Perez|BIN Taxonomy Match|BOLD:ACB9910  
 Metriocnemus sp. 1SW|BIOUG15797-G09|Elisabeth Stur|BIN Taxonomy Match|BOLD:ACB9910  
 Metriocnemus|BIOUG04217-A04|Kate Perez|BIN Taxonomy Match|BOLD:ACB9910  
 Metriocnemus|BIOUG04090-H05|Kate Perez|BIN Taxonomy Match|BOLD:ACB9910  
 Metriocnemus|BIOUG04089-B05|Kate Perez|BIN Taxonomy Match|BOLD:ACB9910  
 Metriocnemus|BIOUG04261-A05|Kate Perez|BIN Taxonomy Match|BOLD:ACB9910  
 Metriocnemus|BIOUG04114-E04|Kate Perez|BIN Taxonomy Match|BOLD:ACB9910  
 Metriocnemus|BIOUG04433-E04|Kate Perez|BIN Taxonomy Match|BOLD:ACB9910  
 Metriocnemus|BIOUG04261-B01|Kate Perez|BIN Taxonomy Match|BOLD:ACB9910  
 Metriocnemus|BIOUG04217-C01|Kate Perez|BIN Taxonomy Match|BOLD:ACB9910  
 Metriocnemus|BIOUG04217-H03|Kate Perez|BIN Taxonomy Match|BOLD:ACB9910  
 Metriocnemus|BIOUG04217-H04|Kate Perez|BIN Taxonomy Match|BOLD:ACB9910  
 Metriocnemus|BIOUG04217-H07|Kate Perez|BIN Taxonomy Match|BOLD:ACB9910  
 Metriocnemus|BIOUG04153-G08|Kate Perez|BIN Taxonomy Match|BOLD:ACB9910  
 Metriocnemus sp. 1SW|BIOUG15674-D07|Elisabeth Stur|BIN Taxonomy Match|BOLD:ACB9910  
 Metriocnemus sp. 1SW|BIOUG15809-A07|Elisabeth Stur|BIN Taxonomy Match|BOLD:ACB9910  
 Metriocnemus|BIOUG04114-B03|Kate Perez|BIN Taxonomy Match|BOLD:ACB9910  
 Metriocnemus|BIOUG04114-A03|Kate Perez|BIN Taxonomy Match|BOLD:ACB9910  
 Metriocnemus|BIOUG04085-F07|Kate Perez|BIN Taxonomy Match|BOLD:ACB9910  
 Bryophaenocladus ictericus|BIOUG36777-A05|Kate Perez|BIN Taxonomy Match (Jul 2018)|BOLD ...  
 Bryophaenocladus ictericus|CCDB24039-F07|Sofia Wiedenbrug|BIN Taxonomy Match|BOLD:AAM6273  
 Bryophaenocladus ictericus|CCDB24039-F09|Sofia Wiedenbrug|BIN Taxonomy Match|BOLD:AAM6273  
 Bryophaenocladus ictericus|BIOUG42704-D02|Kate Perez|BIN Taxonomy Match below Phylum (Jun 201...  
 Bryophaenocladus ictericus|BIOUG07755-A08|Kate Perez|BIN Taxonomy Match|BOLD:AAM6273  
 Bryophaenocladus ictericus|ZSM34343-B08|Sofia Wiedenbrug|Morphology|BOLD:AAM6273  
 Bryophaenocladus ictericus|ZSM34343-B05|Sofia Wiedenbrug|Morphology|BOLD:AAM6273  
 Bryophaenocladus ictericus|CCDB24038-B10|Sofia Wiedenbrug|BIN Taxonomy Match|BOLD:AAM6273  
 Bryophaenocladus ictericus|TRD-CH194|Elisabeth Stur|BOLD:AAM6273  
 Bryophaenocladus ictericus|NHRS-BYWS000000192|Yngve Brodin|morphology|BOLD:AAM6273  
 Bryophaenocladus ictericus|GBOL03734|Sofia Wiedenbrug|BOLD:AAM6273  
 Bryophaenocladus ictericus|CH-OSF169|Elisabeth Stur|BOLD:AAM6273  
 Bryophaenocladus ictericus|BIOUG08220-H03|Kate Perez|BIN Taxonomy Match|BOLD:AAM6273  
 Bryophaenocladus ictericus|BIOUG08130-H09|Kate Perez|BIN Taxonomy Match|BOLD:AAM6273  
 Bryophaenocladus ictericus|CCDB24039-F08|Sofia Wiedenbrug|BIN Taxonomy Match|BOLD:AAM6273  
 Bryophaenocladus ictericus|BIOUG07508-D09|Kate Perez|BIN Taxonomy Match|BOLD:AAM6273  
 Bryophaenocladus ictericus|BIOUG08091-D07|Kate Perez|BIN Taxonomy Match|BOLD:AAM6273  
 Bryophaenocladus ictericus|BIOUG08260-H01|Kate Perez|BIN Taxonomy Match|BOLD:AAM6273  
 Bryophaenocladus ictericus|BIOUG06068-B03|Kate Perez|BIN Taxonomy Match|BOLD:AAM6273  
 Bryophaenocladus ictericus|BIOUG06068-F09|Kate Perez|BIN Taxonomy Match|BOLD:AAM6273  
 Bryophaenocladus ictericus|BIOUG06069-G10|Kate Perez|BIN Taxonomy Match|BOLD:AAM6273  
 Bryophaenocladus ictericus|Finmark689|Elisabeth Stur|BOLD:AAM6273  
 Bryophaenocladus ictericus|BIOUG05389-A06|Kate Perez|BIN Taxonomy Match|BOLD:AAM6273  
 Bryophaenocladus ictericus|BIOUG08252-F09|Kate Perez|BIN Taxonomy Match|BOLD:AAM6273  
 Bryophaenocladus ictericus|BIOUG05897-C12|Kate Perez|BIN Taxonomy Match|BOLD:AAM6273  
 Bryophaenocladus ictericus|BIOUG05897-F07|Kate Perez|BIN Taxonomy Match|BOLD:AAM6273  
 Bryophaenocladus ictericus|CCDB24038-B09|Sofia Wiedenbrug|BIN Taxonomy Match|BOLD:AAM6273  
 Bryophaenocladus ictericus|BIOUG05900-G02|Kate Perez|BIN Taxonomy Match|BOLD:AAM6273  
 Bryophaenocladus ictericus|BIOUG06052-E09|Kate Perez|BIN Taxonomy Match|BOLD:AAM6273  
 Bryophaenocladus ictericus|BIOUG08254-B08|Kate Perez|BIN Taxonomy Match|BOLD:AAM6273  
 Bryophaenocladus ictericus|CCDB24039-B01|Sofia Wiedenbrug|BIN Taxonomy Match|BOLD:AAM6273  
 Bryophaenocladus ictericus|BIOUG37052-E03|Kate Perez|BIN Taxonomy Match (Jul 2018)|BOLD ...  
 Bryophaenocladus ictericus|ZSM34343-B06|Sofia Wiedenbrug|Morphology|BOLD:AAM6273  
 Bryophaenocladus ictericus|BIOUG42918-C08|Kate Perez|BIN Taxonomy Match below Phylum (Jun 201...  
 Bryophaenocladus ictericus|ZSM34342-B07|Sofia Wiedenbrug|Morphology|BOLD:AAM6273  
 Bryophaenocladus ictericus|CH-eik137|Elisabeth Stur|BOLD:AAM6273  
 Bryophaenocladus ictericus|ZSM-DIP-33145-A09|Caroline Chimeno|BIN Taxonomy Match (Jan 2022 ...  
 Bryophaenocladus ictericus|ZSM-DIP-33146-G03|Caroline Chimeno|BIN Taxonomy Match (Jan 2022 ...  
 Bryophaenocladus ictericus|ZSM-DIP-33148-H10|Caroline Chimeno|BIN Taxonomy Match (Jan 2022 ...  
 Bryophaenocladus ictericus|CCDB21606-F12|Sofia Wiedenbrug|BOLD:AAM6273  
 Chironomidae|Koz1141|Mikhail V. Kozlov|BOLD:AAM6273  
 Bryophaenocladus ictericus|BIOUG36788-H08|Kate Perez|BIN Taxonomy Match (Jul 2018)|BOLD ...  
 Bryophaenocladus ictericus|ZSM34343-H08|Sofia Wiedenbrug|Morphology|BOLD:AAM6273  
 Bryophaenocladus ictericus|BIOUG15762-H01|Kate Perez|BIN Taxonomy Match|BOLD:AAM6273  
 Bryophaenocladus ictericus|BIOUG04153-E11|Kate Perez|BIN Taxonomy Match|BOLD:AAM6273  
 Bryophaenocladus ictericus|BIOUG04153-F11|Kate Perez|BIN Taxonomy Match|BOLD:AAM6273  
 Bryophaenocladus ictericus|BIOUG04362-B05|Kate Perez|BIN Taxonomy Match|BOLD:AAM6273  
 Bryophaenocladus ictericus|ZSM34343-H03|Sofia Wiedenbrug|Morphology|BOLD:AAM6273  
 Bryophaenocladus ictericus|BIOUG04212-D03|Kate Perez|BIN Taxonomy Match|BOLD:AAM6273  
 Bryophaenocladus ictericus|BIOUG04216-H03|Kate Perez|BIN Taxonomy Match|BOLD:AAM6273  
 Bryophaenocladus ictericus|BIOUG04216-H11|Kate Perez|BIN Taxonomy Match|BOLD:AAM6273  
 Bryophaenocladus ictericus|BIOUG04153-F02|Kate Perez|BIN Taxonomy Match|BOLD:AAM6273  
 Bryophaenocladus ictericus|BIOUG04296-E03|Kate Perez|BIN Taxonomy Match|BOLD:AAM6273  
 Bryophaenocladus ictericus|BIOUG04296-G10|Kate Perez|BIN Taxonomy Match|BOLD:AAM6273  
 Bryophaenocladus ictericus|BIOUG04155-E12|Kate Perez|BIN Taxonomy Match|BOLD:AAM6273  
 Bryophaenocladus ictericus|BIOUG04362-A01|Kate Perez|BIN Taxonomy Match|BOLD:AAM6273  
 Bryophaenocladus ictericus|BIOUG04362-E12|Kate Perez|BIN Taxonomy Match|BOLD:AAM6273  
 Bryophaenocladus ictericus|BIOUG04362-G06|Kate Perez|BIN Taxonomy Match|BOLD:AAM6273  
 Bryophaenocladus ictericus|BIOUG04362-H01|Kate Perez|BIN Taxonomy Match|BOLD:AAM6273  
 Bryophaenocladus ictericus|BIOUG04153-C03|Kate Perez|BIN Taxonomy Match|BOLD:AAM6273  
 Bryophaenocladus ictericus|BIOUG04362-G07|Kate Perez|BIN Taxonomy Match|BOLD:AAM6273  
 Bryophaenocladus ictericus|BIOUG36786-A10|Kate Perez|BIN Taxonomy Match (Jul 2018)|BOLD ...  
 Bryophaenocladus ictericus|BIOUG15681-F12|Kate Perez|BIN Taxonomy Match|BOLD:AAM6273  
 Bryophaenocladus ictericus|BIOUG15571-F05|Kate Perez|BIN Taxonomy Match|BOLD:AAM6273  
 Bryophaenocladus ictericus|BIOUG15598-A01|Kate Perez|BIN Taxonomy Match|BOLD:AAM6273  
 Bryophaenocladus ictericus|BIOUG16433-C04|Kate Perez|BIN Taxonomy Match|BOLD:AAM6273  
 Bryophaenocladus ictericus|BIOUG16632-H01|Kate Perez|BIN Taxonomy Match|BOLD:AAM6273  
 Bryophaenocladus ictericus|BIOUG36786-A03|Kate Perez|BIN Taxonomy Match (Jul 2018)|BOLD ...  
 Bryophaenocladus ictericus|BIOUG36827-D09|Kate Perez|BIN Taxonomy Match (Jul 2018)|BOLD ...  
 Bryophaenocladus ictericus|BIOUG36681-C08|Kate Perez|BIN Taxonomy Match (Jul 2018)|BOLD ...  
 Bryophaenocladus ictericus|CCDB24038-B08|Sofia Wiedenbrug|BIN Taxonomy Match|BOLD:AAM6273  
 Bryophaenocladus ictericus|BIOUG36931-F11|Kate Perez|BIN Taxonomy Match (May 2018)|BOLD ...  
 Bryophaenocladus ictericus|BIOUG36932-C08|Kate Perez|BIN Taxonomy Match (Jul 2018)|BOLD ...  
 Bryophaenocladus ictericus|BIOUG16619-A02|Kate Perez|BIN Taxonomy Match|BOLD:AAM6273  
 Bryophaenocladus ictericus|BIOUG04366-H02|Kate Perez|BIN Taxonomy Match|BOLD:AAM6273  
 Bryophaenocladus ictericus|BIOUG04362-B10|Kate Perez|BIN Taxonomy Match|BOLD:AAM6273  
 Bryophaenocladus ictericus|BIOUG04362-E07|Kate Perez|BIN Taxonomy Match|BOLD:AAM6273  
 Bryophaenocladus ictericus|BIOUG15593-B01|Kate Perez|BIN Taxonomy Match|BOLD:AAM6273  
 Bryophaenocladus ictericus|BIOUG15648-A08|Kate Perez|BIN Taxonomy Match|BOLD:AAM6273  
 Bryophaenocladus ictericus|ZSM34343-G11|Sofia Wiedenbrug|Morphology|BOLD:AAM6273  
 Bryophaenocladus ictericus|BIOUG15652-E07|Kate Perez|BIN Taxonomy Match|BOLD:AAM6273  
 Bryophaenocladus ictericus|BIOUG37181-D10|Kate Perez|BIN Taxonomy Match (Jul 2018)|BOLD ...

Bryophaeocladus ictericus|ZSM34343-G11|Sofia Wiedenbrug|Morphology|BOLD:AAM6273  
 Bryophaeocladus ictericus|BIOUG15652-E07|Kate Perez|BIN Taxonomy Match|BOLD:AAM6273  
 Bryophaeocladus ictericus|BIOUG37181-D10|Kate Perez|BIN Taxonomy Match (Jul 2018)|BOLD: ...  
 Bryophaeocladus ictericus|ZSM34343-H06|Sofia Wiedenbrug|Morphology|BOLD:AAM6273  
 Bryophaeocladus ictericus|BIOUG15895-A06|Kate Perez|BIN Taxonomy Match|BOLD:AAM6273  
 Bryophaeocladus ictericus|BIOUG15798-B03|Kate Perez|BIN Taxonomy Match|BOLD:AAM6273  
 Bryophaeocladus ictericus|BIOUG15792-H07|Kate Perez|BIN Taxonomy Match|BOLD:AAM6273  
 Bryophaeocladus ictericus|BIOUG15762-E02|Kate Perez|BIN Taxonomy Match|BOLD:AAM6273  
 Bryophaeocladus ictericus|BIOUG15763-A05|Kate Perez|BIN Taxonomy Match|BOLD:AAM6273  
 Orthocladinae|ZSM34343-H07|Sofia Wiedenbrug|Morphology|BOLD:ADC4901  
 Bryophaeocladus cf. vernalis|BIOUG07508-F08|Kate Perez|BIN Taxonomy Match|BOLD:AAP6930  
 Bryophaeocladus cf. vernalis|BIOUG07508-B10|Kate Perez|BIN Taxonomy Match|BOLD:AAP6930  
 Bryophaeocladus cf. vernalis|BIOUG07504-D12|Kate Perez|BIN Taxonomy Match|BOLD:AAP6930  
 Bryophaeocladus cf. vernalis|BIOUG07408-E09|Kate Perez|BIN Taxonomy Match|BOLD:AAP6930  
 Bryophaeocladus cf. vernalis|CH-OSF78|Elisabeth Sturj|BOLD:AAP6930  
 Bryophaeocladus cf. vernalis|BIOUG07806-C04|Kate Perez|BIN Taxonomy Match|BOLD:AAP6930  
 Bryophaeocladus cf. vernalis|BIOUG07405-B06|Kate Perez|BIN Taxonomy Match|BOLD:AAP6930  
 Bryophaeocladus cf. vernalis|BIOUG07756-H08|Kate Perez|BIN Taxonomy Match|BOLD:AAP6930  
 Bryophaeocladus cf. vernalis|BIOUG06070-F04|Kate Perez|BIN Taxonomy Match|BOLD:AAP6930  
 Bryophaeocladus cf. vernalis|BIOUG06097-D05|Kate Perez|BIN Taxonomy Match|BOLD:AAP6930  
 Bryophaeocladus cf. vernalis|CH-eik40|Elisabeth Sturj|BOLD:AAP6930  
 Bryophaeocladus cf. vernalis|BIOUG07648-E05|Kate Perez|BIN Taxonomy Match|BOLD:AAP6930  
 Bryophaeocladus cf. vernalis|BIOUG07568-B07|Kate Perez|BIN Taxonomy Match|BOLD:AAP6930  
 Bryophaeocladus cf. vernalis|BIOUG07756-G05|Kate Perez|BIN Taxonomy Match|BOLD:AAP6930  
 Bryophaeocladus cf. vernalis|BIOUG06208-B01|Kate Perez|BIN Taxonomy Match|BOLD:AAP6930  
 Bryophaeocladus|ZSM-DIP-33142-C04|Caroline Chimento|BIN Taxonomy Match (Jan 2022)|BOLD:...  
 Bryophaeocladus|ZSM-DIP-33133-D10|Caroline Chimento|BIN Taxonomy Match (Jan 2022)|BOLD:...  
 Bryophaeocladus cf. vernalis|BIOUG07508-H05|Kate Perez|BIN Taxonomy Match|BOLD:AAP6930  
 Bryophaeocladus cf. vernalis|BIOUG07407-E03|Kate Perez|BIN Taxonomy Match|BOLD:AAP6930  
 Bryophaeocladus cf. vernalis|BIOUG07409-H10|Kate Perez|BIN Taxonomy Match|BOLD:AAP6930  
 Bryophaeocladus cf. vernalis|CH-eik120|Elisabeth Sturj|BOLD:AAP6930  
 Bryophaeocladus cf. vernalis|BIOUG07565-D07|Kate Perez|BIN Taxonomy Match|BOLD:AAP6930  
 Bryophaeocladus cf. vernalis|BIOUG06047-F10|Kate Perez|BIN Taxonomy Match|BOLD:AAP6930  
 Bryophaeocladus cf. vernalis|Finmark171|Elisabeth Sturj|BOLD:AAP6930  
 Bryophaeocladus cf. vernalis|CH-eik48|Elisabeth Sturj|BOLD:AAP6930  
 Bryophaeocladus cf. vernalis|CH-eik103|Elisabeth Sturj|BOLD:AAP6930  
 Bryophaeocladus ictericus|ZMUO.024896|Lauri Paasivirta|BOLD:AAP6930  
 Bryophaeocladus ictericus|ZMUO.024897|Lauri Paasivirta|BOLD:AAP6930  
 Bryophaeocladus cf. vernalis|CCDB21606-E07|Sofia Wiedenbrug|BOLD:AAP6930  
 Bryophaeocladus cf. vernalis|BIOUG06087-E04|Kate Perez|BIN Taxonomy Match|BOLD:AAP6930  
 Bryophaeocladus cf. vernalis|BIOUG06087-B04|Kate Perez|BIN Taxonomy Match|BOLD:AAP6930  
 Bryophaeocladus cf. vernalis|BIOUG06090-G06|Kate Perez|BIN Taxonomy Match|BOLD:AAP6930  
 Bryophaeocladus cf. vernalis|BIOUG06093-B11|Kate Perez|BIN Taxonomy Match|BOLD:AAP6930  
 Bryophaeocladus cf. vernalis|BIOUG07805-G01|Kate Perez|BIN Taxonomy Match|BOLD:AAP6930  
 Bryophaeocladus cf. vernalis|BIOUG06097-E09|Kate Perez|BIN Taxonomy Match|BOLD:AAP6930  
 Bryophaeocladus cf. vernalis|BIOUG07505-E09|Sofia Wiedenbrug|BOLD:AAP6930  
 Bryophaeocladus cf. vernalis|BIOUG04153-A04|Kate Perez|BIN Taxonomy Match|BOLD:AAP6930  
 Bryophaeocladus|ZSM-DIP-33142-C05|Caroline Chimento|BIN Taxonomy Match (Jan 2022)|BOLD:...  
 Bryophaeocladus cf. vernalis|BIOUG07507-G10|Sofia Wiedenbrug|BOLD:AAP6930  
 Bryophaeocladus cf. vernalis|BIOUG07505-A07|Sofia Wiedenbrug|BOLD:AAP6930  
 Bryophaeocladus cf. vernalis|BIOUG07507-G11|Kate Perez|BIN Taxonomy Match|BOLD:AAP6930  
 Bryophaeocladus cf. vernalis|BIOUG06055-G01|Kate Perez|BIN Taxonomy Match|BOLD:AAP6930  
 Bryophaeocladus cf. vernalis|BIOUG06070-C09|Kate Perez|BIN Taxonomy Match|BOLD:AAP6930  
 Bryophaeocladus cf. vernalis|BIOUG06090-F01|Kate Perez|BIN Taxonomy Match|BOLD:AAP6930  
 Bryophaeocladus cf. vernalis|BIOUG06094-B01|Kate Perez|BIN Taxonomy Match|BOLD:AAP6930  
 Bryophaeocladus cf. vernalis|BIOUG07505-A05|Kate Perez|BIN Taxonomy Match|BOLD:AAP6930  
 Bryophaeocladus cf. vernalis|BIOUG07507-E09|Sofia Wiedenbrug|BOLD:AAP6930  
 Bryophaeocladus cf. vernalis|BIOUG07415-G04|Kate Perez|BIN Taxonomy Match|BOLD:AAP6930  
 Bryophaeocladus cf. vernalis|CH-eik71|Elisabeth Sturj|BOLD:AAP6930  
 Bryophaeocladus cf. vernalis|BIOUG06068-F03|Kate Perez|BIN Taxonomy Match|BOLD:AAP6930  
 Bryophaeocladus cf. vernalis|BIOUG04362-D04|Kate Perez|BIN Taxonomy Match|BOLD:AAP6930  
 Bryophaeocladus cf. vernalis|BIOUG06047-G05|Kate Perez|BIN Taxonomy Match|BOLD:AAP6930  
 Bryophaeocladus cf. vernalis|BIOUG07945-F02|Kate Perez|BIN Taxonomy Match|BOLD:AAP6930  
 Bryophaeocladus cf. vernalis|BIOUG07563-A05|Kate Perez|BIN Taxonomy Match|BOLD:AAP6930  
 Bryophaeocladus cf. vernalis|BIOUG08093-E09|Kate Perez|BIN Taxonomy Match|BOLD:AAP6930  
 Bryophaeocladus cf. vernalis|BIOUG06441-H02|Kate Perez|BIN Taxonomy Match|BOLD:AAP6930  
 Bryophaeocladus cf. vernalis|BIOUG07755-A01|Kate Perez|BIN Taxonomy Match|BOLD:AAP6930  
 Bryophaeocladus cf. vernalis|BIOUG07647-E10|Kate Perez|BIN Taxonomy Match|BOLD:AAP6930  
 Bryophaeocladus cf. vernalis|BIOUG07564-C03|Kate Perez|BIN Taxonomy Match|BOLD:AAP6930  
 Bryophaeocladus cf. vernalis|BIOUG07649-D03|Kate Perez|BIN Taxonomy Match|BOLD:AAP6930  
 Bryophaeocladus cf. vernalis|BIOUG07927-D02|Kate Perez|BIN Taxonomy Match|BOLD:AAP6930  
 Bryophaeocladus cf. vernalis|BIOUG07414-F12|Kate Perez|BIN Taxonomy Match|BOLD:AAP6930  
 Bryophaeocladus cf. vernalis|BIOUG06280-D05|Kate Perez|BIN Taxonomy Match|BOLD:AAP6930  
 Bryophaeocladus cf. vernalis|BIOUG07563-F02|Kate Perez|BIN Taxonomy Match|BOLD:AAP6930  
 Bryophaeocladus cf. vernalis|BIOUG06070-G02|Kate Perez|BIN Taxonomy Match|BOLD:AAP6930  
 Bryophaeocladus cf. vernalis|BIOUG06446-B06|Kate Perez|BIN Taxonomy Match|BOLD:AAP6930  
 Bryophaeocladus cf. vernalis|BIOUG08318-E04|Kate Perez|BIN Taxonomy Match|BOLD:AAP6930  
 Bryophaeocladus cf. vernalis|BIOUG07648-D04|Kate Perez|BIN Taxonomy Match|BOLD:AAP6930  
 Bryophaeocladus cf. vernalis|Finmark614|Elisabeth Sturj|BOLD:AAP6930  
 Bryophaeocladus inconstans|24540-H03|Kate Perez|BIN Taxonomy Match|BOLD:AAF6748  
 Bryophaeocladus inconstans|ATNA423|Elisabeth Sturj|BOLD:AAF6748  
 Bryophaeocladus inconstans|ATNA422|Elisabeth Sturj|BOLD:AAF6748  
 Bryophaeocladus inconstans|ATNA421|Elisabeth Sturj|BOLD:AAF6748  
 Zalutschia zalutschicola|ZMUO.024274|Lauri Paasivirta|BOLD:ADA7791  
 Zalutschia zalutschicola|ZMUO.024273|Lauri Paasivirta|BOLD:ADA7791  
 Zalutschia zalutschicola|PP0262|Lauri Paasivirta|BOLD:ADA7791  
 Zalutschia sp. 1ES|TRD-CH104|Elisabeth Sturj|Morphology|BOLD:AAV3187  
 Zalutschia sp. 1ES|Finmark425|Elisabeth Sturj|BOLD:AAV3187  
 Zalutschia sp. 1ES|Finmark336|Elisabeth Sturj|BOLD:AAV3187  
 Tvetenia bavarica grp|CCDB21606-D03|Sofia Wiedenbrug|BOLD:ACT6688  
 Tvetenia|GBOL11531|Sofia Wiedenbrug|BOLD:ACU4419  
 Tvetenia|GBOL11526|Sofia Wiedenbrug|BOLD:ACU4419  
 Tvetenia calvescens|E556|Elisabeth Sturj|BOLD:AAF6377  
 Trissocladus brevipalpis|ZMUO.025938|Lauri Paasivirta|BOLD:AAI3500  
 Oliveridia|ATNA382|Elisabeth Sturj|BOLD:AAI3500  
 Oliveridia|ATNA304|Elisabeth Sturj|BOLD:AAI3500  
 Oliveridia|ATNA379|Elisabeth Sturj|BOLD:AAI3500  
 Orthocladinae|BIOUG16777-H05|Jerome Moriniere|BIN Taxonomy Match|BOLD:ACU2621  
 Orthocladinae|BIOUG16778-D07|Jerome Moriniere|BIN Taxonomy Match|BOLD:ADV3676  
 Orthocladinae|BIOUG16740-B07|Jerome Moriniere|BIN Taxonomy Match|BOLD:ADV8591  
 Orthocladinae|BIOUG16854-F12|Jerome Moriniere|BIN Taxonomy Match|BOLD:ADV8591  
 Orthocladinae|BIOUG16739-B10|Jerome Moriniere|BIN Taxonomy Match|BOLD:ADV8591  
 Orthocladus rivulorum|MZ004969||BOLD:AEK3719

Orthocladinae|BIOUG16854-F12|Jerome Moriniere|BIN Taxonomy Match|BOLD:ADV8591  
 Orthocladinae|BIOUG16739-B10|Jerome Moriniere|BIN Taxonomy Match|BOLD:ADV8591  
 Orthocladus rivulorum|MZ004969||BOLD:AEK3719  
 Orthocladus thienemanni|BIOUG16893-F07|Jerome Moriniere|BIN Taxonomy Match|BOLD:ABW5947  
 Orthocladus thienemanni|BIOUG16740-D04|Jerome Moriniere|BIN Taxonomy Match|BOLD:ABW5947  
 Orthocladus thienemanni|BIOUG16856-C03|Jerome Moriniere|BIN Taxonomy Match|BOLD:ABW5947  
 Orthocladus thienemanni|BIOUG16892-A02|Jerome Moriniere|BIN Taxonomy Match|BOLD:ABW5947  
 Orthocladus thienemanni|BIOUG16785-F08|Jerome Moriniere|BIN Taxonomy Match|BOLD:ABW5947  
 Orthocladus thienemanni|BIOUG16785-G12|Jerome Moriniere|BIN Taxonomy Match|BOLD:ABW5947  
 Orthocladus thienemanni|BIOUG16720-B03|Jerome Moriniere|BIN Taxonomy Match|BOLD:ABW5947  
 Orthocladus thienemanni|BIOUG16784-B05|Jerome Moriniere|BIN Taxonomy Match|BOLD:ABW5947  
 Orthocladus thienemanni|BIOUG16785-G06|Jerome Moriniere|BIN Taxonomy Match|BOLD:ABW5947  
 Orthocladinae|BI2019\_B01|Bart Peeters|BOLD ID-Engine|BOLD:ABW5947  
 Orthocladinae|BI2019\_A01|Aina Aspaas|BOLD ID-Engine|BOLD:ABW5947  
 Hydrobaenus conformis|ZMUO.024537|Lauri Paasivirta||BOLD:ADA6732  
 Hydrobaenus conformis|ZMUO.024536|Lauri Paasivirta||BOLD:ADA6732  
 Hydrobaenus conformis|Finmark534|Elisabeth Sturj|BOLD:AAQ2644  
 Hydrobaenus conformis|Finmark515|Elisabeth Sturj|BOLD:AAQ2644  
 Tvetenia calvescens|EBAl-Ch106|Elisabeth Sturj|BOLD Identification Engine|BOLD:AAF6379  
 Tvetenia calvescens|EBAl-Ch104|Elisabeth Sturj|morphology|BOLD:AAF6379  
 Tvetenia calvescens|EBAl-Ch112|Elisabeth Sturj|morphology|BOLD:AAF6379  
 Tvetenia calvescens|Finmark876|Elisabeth Sturj|BOLD:AAF6379  
 Tvetenia calvescens|ATNA355|Elisabeth Sturj|BOLD:AAF6379  
 Tvetenia calvescens|EBAl-Ch254|Elisabeth Sturj|morphology|BOLD:AAF6379  
 Tvetenia calvescens|EBAl-Ch109|Elisabeth Sturj|BOLD Identification Engine|BOLD:AAF6379  
 Tvetenia calvescens|EBAl-Ch111|Elisabeth Sturj|morphology|BOLD:AAF6379  
 Tvetenia calvescens|EBAl-Ch206|Elisabeth Sturj|morphology|BOLD:AAF6379  
 Tvetenia calvescens|EBAl-Ch205|Elisabeth Sturj|morphology|BOLD:AAF6379  
 Tvetenia calvescens|ATNA490|Elisabeth Sturj|BOLD:AAF6379  
 Tvetenia calvescens|ATNA489|Elisabeth Sturj|BOLD:AAF6379  
 Tvetenia calvescens|EBAl-Ch102|Elisabeth Sturj|BOLD Identification Engine|BOLD:AAF6379  
 Tvetenia calvescens|EBAl-Ch110|Elisabeth Sturj|BOLD Identification Engine|BOLD:AAF6379  
 Tvetenia calvescens|ATNA486|Elisabeth Sturj|BOLD:AAF6379  
 Tvetenia calvescens|BIOUG16430-D12|Kate Perez|BIN Taxonomy Match|BOLD:AAF6378  
 Tvetenia calvescens|ZMUO.025278|Lauri Paasivirta||BOLD:AAF6378  
 Tvetenia calvescens|ZMUO.025277|Lauri Paasivirta||BOLD:AAF6378  
 Tvetenia calvescens|BIOUG08136-F06|Kate Perez|BIN Taxonomy Match|BOLD:AAF6378  
 Tvetenia calvescens|Finmark779|Elisabeth Sturj|BOLD:AAF6378  
 Tvetenia calvescens|ZSM-DIP-33128-F01|Caroline Chimenó|BIN Taxonomy Match (Jan 2022)|BOLD ...  
 Tvetenia calvescens|ATNA374|Elisabeth Sturj|BOLD:AAF6378  
 Tvetenia calvescens|ATNA264|Elisabeth Sturj|BOLD:AAF6378  
 Tvetenia calvescens|CH-eik90|Elisabeth Sturj|BOLD:AAF6378  
 Tvetenia calvescens|ATNA359|Elisabeth Sturj|BOLD:AAF6378  
 Tvetenia calvescens|ZSM-DIP-33143-F09|Caroline Chimenó|BIN Taxonomy Match (Jan 2022)|BOLD ...  
 Tvetenia calvescens|PK-192-205|Petra Kranzfelder|morphology|BOLD:AAF6378  
 Tvetenia calvescens|Finmark805|G. A. Halvorsen||BOLD:AAF6378  
 Tvetenia calvescens|Finmark828|Elisabeth Sturj|BOLD:AAF6378  
 Tvetenia calvescens|Finmark23|Elisabeth Sturj|BOLD:AAF6378  
 Tvetenia calvescens|Finmark410|Elisabeth Sturj|BOLD:AAF6378  
 Chironomidae|BIOUG17114-A08|Jerome Moriniere|BIN Taxonomy Match|BOLD:ACR2857  
 Chironomidae|BIOUG17117-G09|Kate Perez|Tree base identification  
 Tvetenia discoloripes|ZMUO.024804|Lauri Paasivirta||BOLD:AAF6373  
 Tvetenia verralli|ATNA360|Elisabeth Sturj|BOLD:AAF6373  
 Tvetenia verralli|ATNA361|Elisabeth Sturj|BOLD:AAF6373  
 Tvetenia verralli|ATNA375|Elisabeth Sturj|BOLD:AAF6373  
 Tvetenia verralli|BIOUG16297-D06|Kate Perez|BIN Taxonomy Match|BOLD:AAF6373  
 Tvetenia verralli|ZMUO.025279|Lauri Paasivirta||BOLD:AAF6373  
 Tvetenia verralli|ZMUO.025280|Lauri Paasivirta||BOLD:AAF6373  
 Tvetenia verralli|Finmark26|Elisabeth Sturj|BOLD:AAF6373  
 Orthocladus|CCDB24037-E12|Jerome Moriniere|BIN Taxonomy Match|BOLD:ACU5455  
 Orthocladus|BC-ZSM-DIP-22491-D01|Dieter Doczkal|BIN Taxonomy Match|BOLD:ACU5455  
 Eukiefferiella cf. minor|ZSM34343-H05|Jerome Moriniere||BOLD:ACU5455  
 Orthocladus|CCDB24229-H03|Jerome Moriniere|BIN Taxonomy Match|BOLD:ACU5455  
 Orthocladus|CCDB24039-C11|Jerome Moriniere|BIN Taxonomy Match|BOLD:ACU5455  
 Orthocladus|CCDB24037-E06|Jerome Moriniere|BIN Taxonomy Match|BOLD:ACU5455  
 Orthocladus|BC-ZSM-DIP-22491-F06|Dieter Doczkal|BIN Taxonomy Match|BOLD:ACU5455  
 Orthocladus|BC-ZSM-DIP-22491-G03|Dieter Doczkal|BIN Taxonomy Match|BOLD:ACU5455  
 Orthocladus|CCDB24039-D03|Jerome Moriniere|BIN Taxonomy Match|BOLD:ACU5455  
 Orthocladus|BC-ZSM-DIP-22491-D11|Dieter Doczkal|BIN Taxonomy Match|BOLD:ACU5455  
 Orthocladus|CCDB24229-G06|Jerome Moriniere|BIN Taxonomy Match|BOLD:ACU5455  
 Orthocladus|CCDB24039-E07|Jerome Moriniere|BIN Taxonomy Match|BOLD:ACU5455  
 Orthocladus|CCDB24038-E03|Jerome Moriniere|BIN Taxonomy Match|BOLD:ACU5455  
 Orthocladus|BC-ZSM-DIP-22551-C08|Dieter Doczkal|BIN Taxonomy Match|BOLD:ACU5455  
 Orthocladus|BC-ZSM-DIP-22491-H06|Dieter Doczkal|BIN Taxonomy Match|BOLD:ACU5455  
 Orthocladus|CCDB24039-D06|Jerome Moriniere|BIN Taxonomy Match|BOLD:ACU5455  
 Orthocladus|CCDB24039-D05|Jerome Moriniere|BIN Taxonomy Match|BOLD:ACU5455  
 Orthocladus|CCDB24039-C10|Jerome Moriniere|BIN Taxonomy Match|BOLD:ACU5455  
 Orthocladus|CCDB24039-H10|Jerome Moriniere|BIN Taxonomy Match|BOLD:ACU5455  
 Orthocladus|BC-ZSM-DIP-22551-C11|Dieter Doczkal|BIN Taxonomy Match|BOLD:ACU5455  
 Orthocladus|BC-ZSM-DIP-22551-D12|Dieter Doczkal|BIN Taxonomy Match|BOLD:ACU5455  
 Orthocladus|CCDB24039-C12|Jerome Moriniere|BIN Taxonomy Match|BOLD:ACU5455  
 Orthocladus|CCDB24039-D01|Jerome Moriniere|BIN Taxonomy Match|BOLD:ACU5455  
 Orthocladus|BC-ZSM-DIP-22491-F08|Dieter Doczkal|BIN Taxonomy Match|BOLD:ACU5455  
 Orthocladus|BC-ZSM-DIP-22491-F10|Dieter Doczkal|BIN Taxonomy Match|BOLD:ACU5455  
 Orthocladus|CCDB24037-E05|Jerome Moriniere|BIN Taxonomy Match|BOLD:ACU5455  
 Orthocladus|CCDB24038-D10|Jerome Moriniere|BIN Taxonomy Match|BOLD:ACU5455  
 Orthocladus|BC-ZSM-DIP-22551-C05|Dieter Doczkal|BIN Taxonomy Match|BOLD:ACU5455  
 Orthocladus|BC-ZSM-DIP-22488-F11|Dieter Doczkal|BIN Taxonomy Match|BOLD:ACU5455  
 Orthocladus|BC-ZSM-DIP-22491-E07|Dieter Doczkal|BIN Taxonomy Match|BOLD:ACU5455  
 Orthocladus|BC-ZSM-DIP-22491-G08|Dieter Doczkal|BIN Taxonomy Match|BOLD:ACU5455  
 Orthocladus|BC-ZSM-DIP-22491-E11|Dieter Doczkal|BIN Taxonomy Match|BOLD:ACU5455  
 Eukiefferiella minor|BIOUG16630-H03|Kate Perez|BIN Taxonomy Match|BOLD:AAE3299  
 Eukiefferiella minor|BIOUG16713-F09|Kate Perez|BIN Taxonomy Match|BOLD:AAE3299  
 Eukiefferiella minor|BIOUG16632-G01|Kate Perez|BIN Taxonomy Match|BOLD:AAE3299  
 Eukiefferiella minor|BIOUG17022-E11|Kate Perez|BIN Taxonomy Match|BOLD:AAE3299  
 Eukiefferiella minor|BIOUG16712-G05|Kate Perez|BIN Taxonomy Match|BOLD:AAE3299  
 Eukiefferiella minor|BIOUG16713-A12|Kate Perez|BIN Taxonomy Match|BOLD:AAE3299  
 Eukiefferiella minor|BIOUG15536-F06|Kate Perez|BIN Taxonomy Match|BOLD:AAE3299  
 Eukiefferiella minor|BIOUG15600-B07|Kate Perez|BIN Taxonomy Match|BOLD:AAE3299  
 Eukiefferiella minor|BIOUG15541-C08|Kate Perez|BIN Taxonomy Match|BOLD:AAE3299  
 Eukiefferiella minor|ATNA131|Elisabeth Sturj|BOLD:AAE3299  
 Eukiefferiella minor|BIOUG16632-D11|Kate Perez|BIN Taxonomy Match|BOLD:AAE3299  
 Eukiefferiella minor|BIOUG16631-C08|Kate Perez|BIN Taxonomy Match|BOLD:AAE3299





Eukiefferiella minor|BIOUG15719-D11|Kate Perez|BIN Taxonomy Match|BOLD:AAE3299  
 Eukiefferiella minor|BIOUG15764-F08|Kate Perez|BIN Taxonomy Match|BOLD:AAE3299  
 Eukiefferiella minor|Finmark570|Elisabeth Stur|BOLD:AAE3299  
 Eukiefferiella devonica|EBAI-Ch140|Elisabeth Stur|BOLD Identification Engine|BOLD:AAE4574  
 Eukiefferiella devonica|ATNA246|Elisabeth Stur|BOLD:AAE4574  
 Eukiefferiella devonica|ATNA241|Elisabeth Stur|BOLD:AAE4574  
 Eukiefferiella devonica|ATNA239|Elisabeth Stur|BOLD:AAE4574  
 Eukiefferiella devonica|ATNA499|Elisabeth Stur|BOLD:AAE4574  
 Eukiefferiella dittmari|ZMUO.024705|Lauri Paasivirta|BOLD:AAI5129  
 Eukiefferiella dittmari|ZMUO.024704|Lauri Paasivirta|BOLD:AAI5129  
 Eukiefferiella dittmari|EJV-20110187|Lauri Paasivirta|BOLD:AAI5129  
 Eukiefferiella dittmari|Finmark194|Elisabeth Stur|BOLD:AAI5129  
 Eukiefferiella dittmari|EJV-20110186|Lauri Paasivirta|BOLD:AAI5129  
 Eukiefferiella dittmari|EJV-20110185|Lauri Paasivirta|BOLD:AAI5129  
 Eukiefferiella dittmari|TRD-CH397|Elisabeth Stur|morphology|BOLD:AAI5129  
 Eukiefferiella dittmari|ATNA256|Elisabeth Stur|BOLD:AAI5129  
 Eukiefferiella dittmari|BIOUG16597-E12|Kate Perez|BIN Taxonomy Match|BOLD:AAI5129  
 Eukiefferiella dittmari|BIOUG15763-F07|Kate Perez|BIN Taxonomy Match|BOLD:AAI5129  
 Eukiefferiella devonica|ZMUO.024801|Lauri Paasivirta|BOLD:AAI5128  
 Eukiefferiella ilkleyensis|ATNA348|G. A. Halvorsen|BOLD:AAI5128  
 Eukiefferiella ilkleyensis|Finmark843|G. A. Halvorsen|BOLD:AAI5128  
 Eukiefferiella ilkleyensis|ATNA500|G. A. Halvorsen|BOLD:AAI5128  
 Eukiefferiella ilkleyensis|ATNA498|G. A. Halvorsen|BOLD:AAI5128  
 Eukiefferiella ilkleyensis|ATNA513|G. A. Halvorsen|BOLD:AAI5128  
 Eukiefferiella ilkleyensis|ATNA512|G. A. Halvorsen|BOLD:AAI5128  
 Eukiefferiella ilkleyensis|ATNA502|G. A. Halvorsen|BOLD:AAI5128  
 Eukiefferiella ilkleyensis|Finmark844|G. A. Halvorsen|BOLD:AAI5128  
 Eukiefferiella ilkleyensis|Finmark845|G. A. Halvorsen|BOLD:AAI5128  
 Eukiefferiella ilkleyensis|EBAI-Ch192|Elisabeth Stur|morphology|BOLD:AAI5128  
 Eukiefferiella ilkleyensis|EBAI-Ch141|Elisabeth Stur|BOLD Identification Engine|BOLD:AAI5128  
 Eukiefferiella devonica|ZMUO.024800|Lauri Paasivirta|BOLD:AAI5128  
 Eukiefferiella ilkleyensis|EBAI-Ch084|Elisabeth Stur|morphology|BOLD:AAI5128  
 Eukiefferiella ilkleyensis|EBAI-Ch085|Elisabeth Stur|morphology|BOLD:AAI5128  
 Eukiefferiella ilkleyensis|EBAI-Ch193|Elisabeth Stur|morphology|BOLD:AAI5128  
 Eukiefferiella ilkleyensis|ATNA501|G. A. Halvorsen|BOLD:AAI5128  
 Eukiefferiella ilkleyensis|ATNA153|G. A. Halvorsen|BOLD:AAI5128  
 Eukiefferiella ilkleyensis|ATNA162|G. A. Halvorsen|BOLD:AAI5128  
 Eukiefferiella ilkleyensis|ATNA160|G. A. Halvorsen|BOLD:AAI5128  
 Eukiefferiella ilkleyensis|ATNA144|G. A. Halvorsen|BOLD:AAI5128  
 Eukiefferiella ilkleyensis|ATNA497|G. A. Halvorsen|BOLD:AAI5128  
 Eukiefferiella devonica|BIOUG16859-D06|Jerome Moriniere|BIN Taxonomy Match|BOLD:ACP5613  
 Eukiefferiella devonica|BIOUG17119-F05|Jerome Moriniere|BIN Taxonomy Match|BOLD:ACP5613  
 Eukiefferiella|BIOUG15650-G03|Elisabeth Stur|morphology|BOLD:ACP5613  
 Eukiefferiella|BIOUG15720-F03|Elisabeth Stur|morphology|BOLD:ACP5613  
 Eukiefferiella|BIOUG15561-E08|Elisabeth Stur|morphology|BOLD:ACP5613  
 Eukiefferiella|BIOUG15762-C12|Elisabeth Stur|morphology|BOLD:ACP5613  
 Tokunagaia sp. 1ES|BIOUG15808-B12|Valerie Levesque-Beaudin|BIN Taxonomy Match|BOLD:ACP6976  
 Tokunagaia sp. 1ES|BIOUG16712-B08|Valerie Levesque-Beaudin|BIN Taxonomy Match|BOLD:ACP6976  
 Tokunagaia sp. 1ES|BIOUG16713-B10|Valerie Levesque-Beaudin|BIN Taxonomy Match|BOLD:ACP6976  
 Tokunagaia sp. 1ES|BIOUG16432-F12|Valerie Levesque-Beaudin|BIN Taxonomy Match|BOLD:ACP6976  
 Tokunagaia sp. 1ES|BIOUG16711-C09|Valerie Levesque-Beaudin|BIN Taxonomy Match|BOLD:ACP6976  
 Tokunagaia sp. 1ES|BIOUG16594-F06|Valerie Levesque-Beaudin|BIN Taxonomy Match|BOLD:ACP6976  
 Tokunagaia sp. 1ES|BIOUG15765-G04|Valerie Levesque-Beaudin|BIN Taxonomy Match|BOLD:ACP6976  
 Tokunagaia sp. 1ES|BIOUG15761-H06|Valerie Levesque-Beaudin|BIN Taxonomy Match|BOLD:ACP6976  
 Tokunagaia sp. 1ES|BIOUG16712-A01|Valerie Levesque-Beaudin|BIN Taxonomy Match|BOLD:ACP6976  
 Tokunagaia sp. 1ES|BIOUG16711-E02|Valerie Levesque-Beaudin|BIN Taxonomy Match|BOLD:ACP6976  
 Tokunagaia sp. 1ES|BIOUG16630-H06|Valerie Levesque-Beaudin|BIN Taxonomy Match|BOLD:ACP6976  
 Tokunagaia sp. 1ES|BIOUG15719-D04|Valerie Levesque-Beaudin|BIN Taxonomy Match|BOLD:ACP6976  
 Tokunagaia sp. 1ES|BIOUG15800-E12|Valerie Levesque-Beaudin|BIN Taxonomy Match|BOLD:ACP6976  
 Tokunagaia sp. 1ES|BIOUG16476-G12|Valerie Levesque-Beaudin|BIN Taxonomy Match|BOLD:ACP6976  
 Tokunagaia sp. 1ES|BIOUG16632-F10|Valerie Levesque-Beaudin|BIN Taxonomy Match|BOLD:ACP6976  
 Tokunagaia sp. 1ES|BIOUG16477-F04|Valerie Levesque-Beaudin|BIN Taxonomy Match|BOLD:ACP6976  
 Tokunagaia sp. 1ES|BIOUG15853-H08|Valerie Levesque-Beaudin|BIN Taxonomy Match|BOLD:ACP6976  
 Tokunagaia sp. 1ES|BIOUG16435-E10|Valerie Levesque-Beaudin|BIN Taxonomy Match|BOLD:ACP6976  
 Tokunagaia sp. 1ES|BIOUG16205-B07|Valerie Levesque-Beaudin|BIN Taxonomy Match|BOLD:ACP6976  
 Tokunagaia sp. 1ES|BIOUG16330-F06|Valerie Levesque-Beaudin|BIN Taxonomy Match|BOLD:ACP6976  
 Tokunagaia sp. 1ES|BIOUG15719-A09|Valerie Levesque-Beaudin|BIN Taxonomy Match|BOLD:ACP6976  
 Tokunagaia sp. 1ES|BIOUG15761-F10|Valerie Levesque-Beaudin|BIN Taxonomy Match|BOLD:ACP6976  
 Tokunagaia sp. 1ES|BIOUG15794-A05|Valerie Levesque-Beaudin|BIN Taxonomy Match|BOLD:ACP6976  
 Tokunagaia sp. 1ES|BIOUG16625-D10|Valerie Levesque-Beaudin|BIN Taxonomy Match|BOLD:ACP6976  
 Tokunagaia sp. 1ES|BIOUG17022-F09|Valerie Levesque-Beaudin|BIN Taxonomy Match|BOLD:ACP6976  
 Tokunagaia sp. 1ES|BIOUG15719-C06|Valerie Levesque-Beaudin|BIN Taxonomy Match|BOLD:ACP6976  
 Tokunagaia sp. 1ES|BIOUG16711-E11|Valerie Levesque-Beaudin|BIN Taxonomy Match|BOLD:ACP6976  
 Tokunagaia sp. 1ES|BIOUG15764-G10|Valerie Levesque-Beaudin|BIN Taxonomy Match|BOLD:ACP6976  
 Tokunagaia sp. 1ES|BIOUG15794-B04|Valerie Levesque-Beaudin|BIN Taxonomy Match|BOLD:ACP6976  
 Tokunagaia sp. 1ES|BIOUG15720-H07|Valerie Levesque-Beaudin|BIN Taxonomy Match|BOLD:ACP6976  
 Tokunagaia sp. 1ES|BIOUG16631-E07|Valerie Levesque-Beaudin|BIN Taxonomy Match|BOLD:ACP6976  
 Tokunagaia sp. 1ES|BIOUG16713-A10|Valerie Levesque-Beaudin|BIN Taxonomy Match|BOLD:ACP6976  
 Tokunagaia sp. 1ES|BIOUG15766-A12|Valerie Levesque-Beaudin|BIN Taxonomy Match|BOLD:ACP6976  
 Tokunagaia sp. 1ES|BIOUG15764-G06|Valerie Levesque-Beaudin|BIN Taxonomy Match|BOLD:ACP6976  
 Tokunagaia sp. 1ES|BIOUG16631-G03|Elisabeth Stur|morphology|BOLD:ACP6976  
 Tokunagaia sp. 1ES|BIOUG15762-A12|Valerie Levesque-Beaudin|BIN Taxonomy Match|BOLD:ACP6976  
 Tokunagaia sp. 1ES|BIOUG15763-A06|Valerie Levesque-Beaudin|BIN Taxonomy Match|BOLD:ACP6976  
 Tokunagaia sp. 1ES|BIOUG15718-E09|Elisabeth Stur|morphology|BOLD:ACP6976  
 Tokunagaia sp. 1ES|BIOUG15762-B07|Valerie Levesque-Beaudin|BIN Taxonomy Match|BOLD:ACP6976  
 Tokunagaia sp. 1ES|BIOUG15949-G02|Valerie Levesque-Beaudin|BIN Taxonomy Match|BOLD:ACP6976  
 Tokunagaia sp. 1ES|BIOUG16597-D10|Valerie Levesque-Beaudin|BIN Taxonomy Match|BOLD:ACP6976  
 Tokunagaia sp. 1ES|BIOUG16711-C08|Valerie Levesque-Beaudin|BIN Taxonomy Match|BOLD:ACP6976  
 Tokunagaia sp. 1ES|BIOUG17022-D05|Valerie Levesque-Beaudin|BIN Taxonomy Match|BOLD:ACP6976  
 Tokunagaia sp. 1ES|BIOUG15720-G11|Valerie Levesque-Beaudin|BIN Taxonomy Match|BOLD:ACP6976  
 Tokunagaia sp. 1ES|BIOUG16711-C01|Valerie Levesque-Beaudin|BIN Taxonomy Match|BOLD:ACP6976  
 Tokunagaia sp. 1ES|BIOUG15793-A02|Valerie Levesque-Beaudin|BIN Taxonomy Match|BOLD:ACP6976  
 Tokunagaia sp. 1ES|BIOUG16712-D07|Valerie Levesque-Beaudin|BIN Taxonomy Match|BOLD:ACP6976  
 Tokunagaia sp. 1ES|BIOUG15762-D02|Valerie Levesque-Beaudin|BIN Taxonomy Match|BOLD:ACP6976  
 Tokunagaia sp. 1ES|BIOUG15762-A07|Valerie Levesque-Beaudin|BIN Taxonomy Match|BOLD:ACP6976  
 Tokunagaia sp. 1ES|BIOUG15720-E03|Valerie Levesque-Beaudin|BIN Taxonomy Match|BOLD:ACP6976  
 Tokunagaia sp. 1ES|BIOUG15764-D04|Valerie Levesque-Beaudin|BIN Taxonomy Match|BOLD:ACP6976  
 Tokunagaia sp. 1ES|BIOUG16711-B05|Valerie Levesque-Beaudin|BIN Taxonomy Match|BOLD:ACP6976  
 Tokunagaia sp. 1ES|BIOUG16711-F03|Valerie Levesque-Beaudin|BIN Taxonomy Match|BOLD:ACP6976  
 Tokunagaia sp. 1ES|BIOUG16631-H09|Valerie Levesque-Beaudin|BIN Taxonomy Match|BOLD:ACP6976  
 Tokunagaia sp. 1ES|BIOUG15720-G03|Valerie Levesque-Beaudin|BIN Taxonomy Match|BOLD:ACP6976  
 Tokunagaia sp. 1ES|BIOUG16711-C12|Valerie Levesque-Beaudin|BIN Taxonomy Match|BOLD:ACP6976  
 Tokunagaia sp. 1ES|BIOUG16631-A07|Valerie Levesque-Beaudin|BIN Taxonomy Match|BOLD:ACP6976







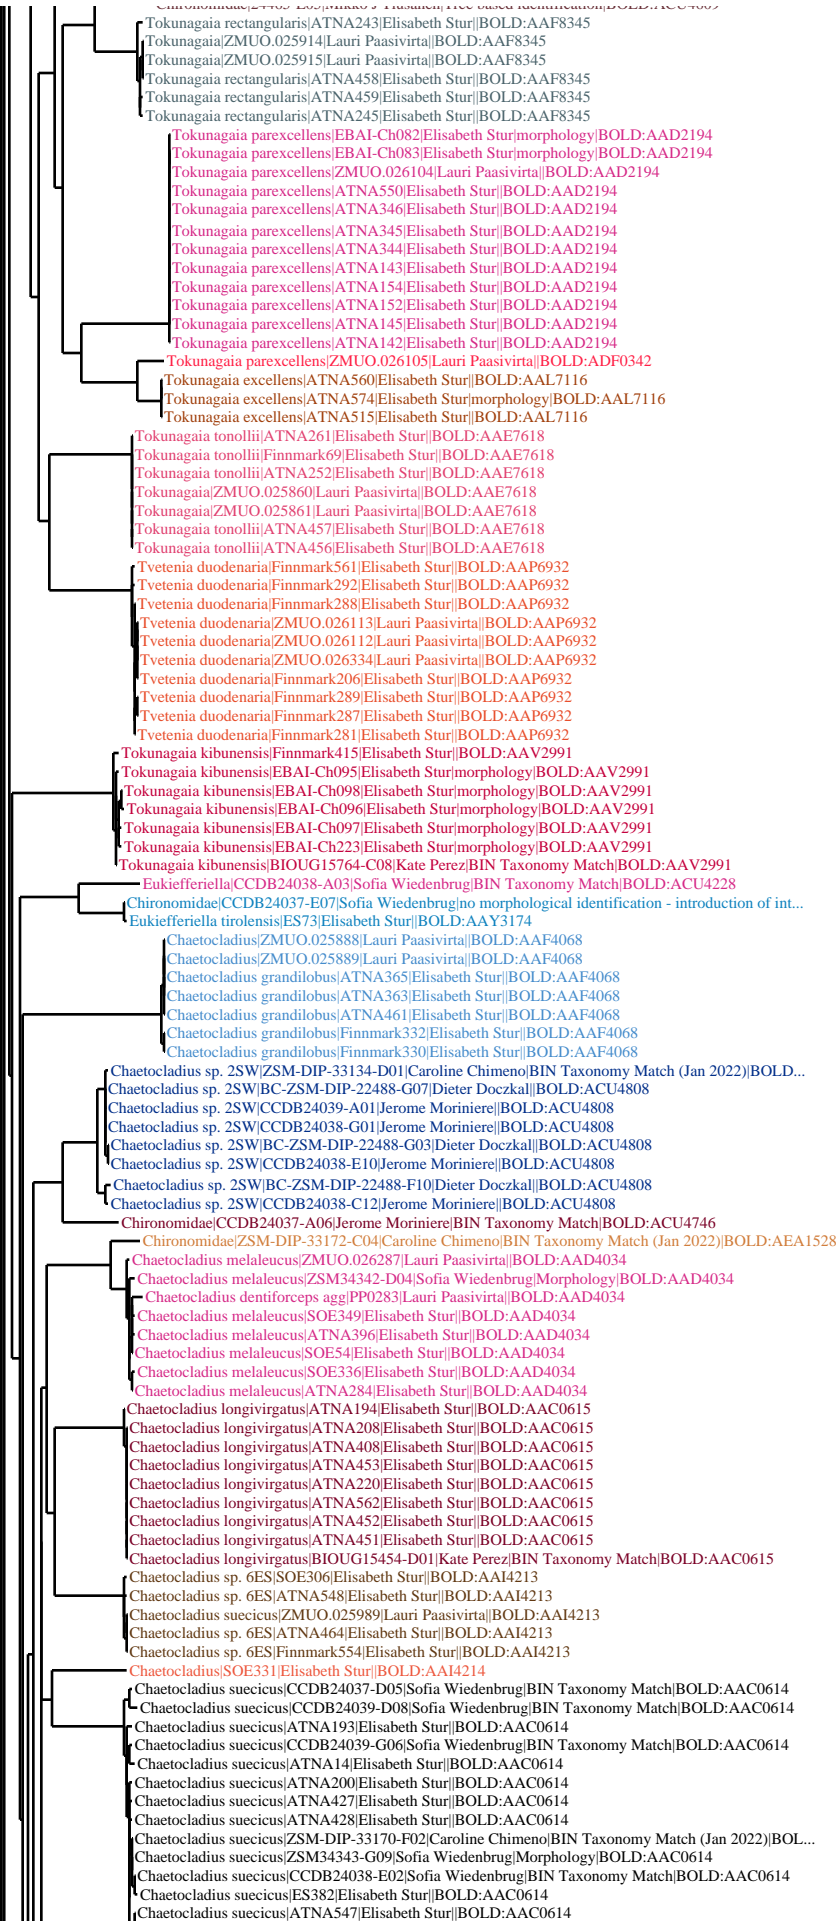

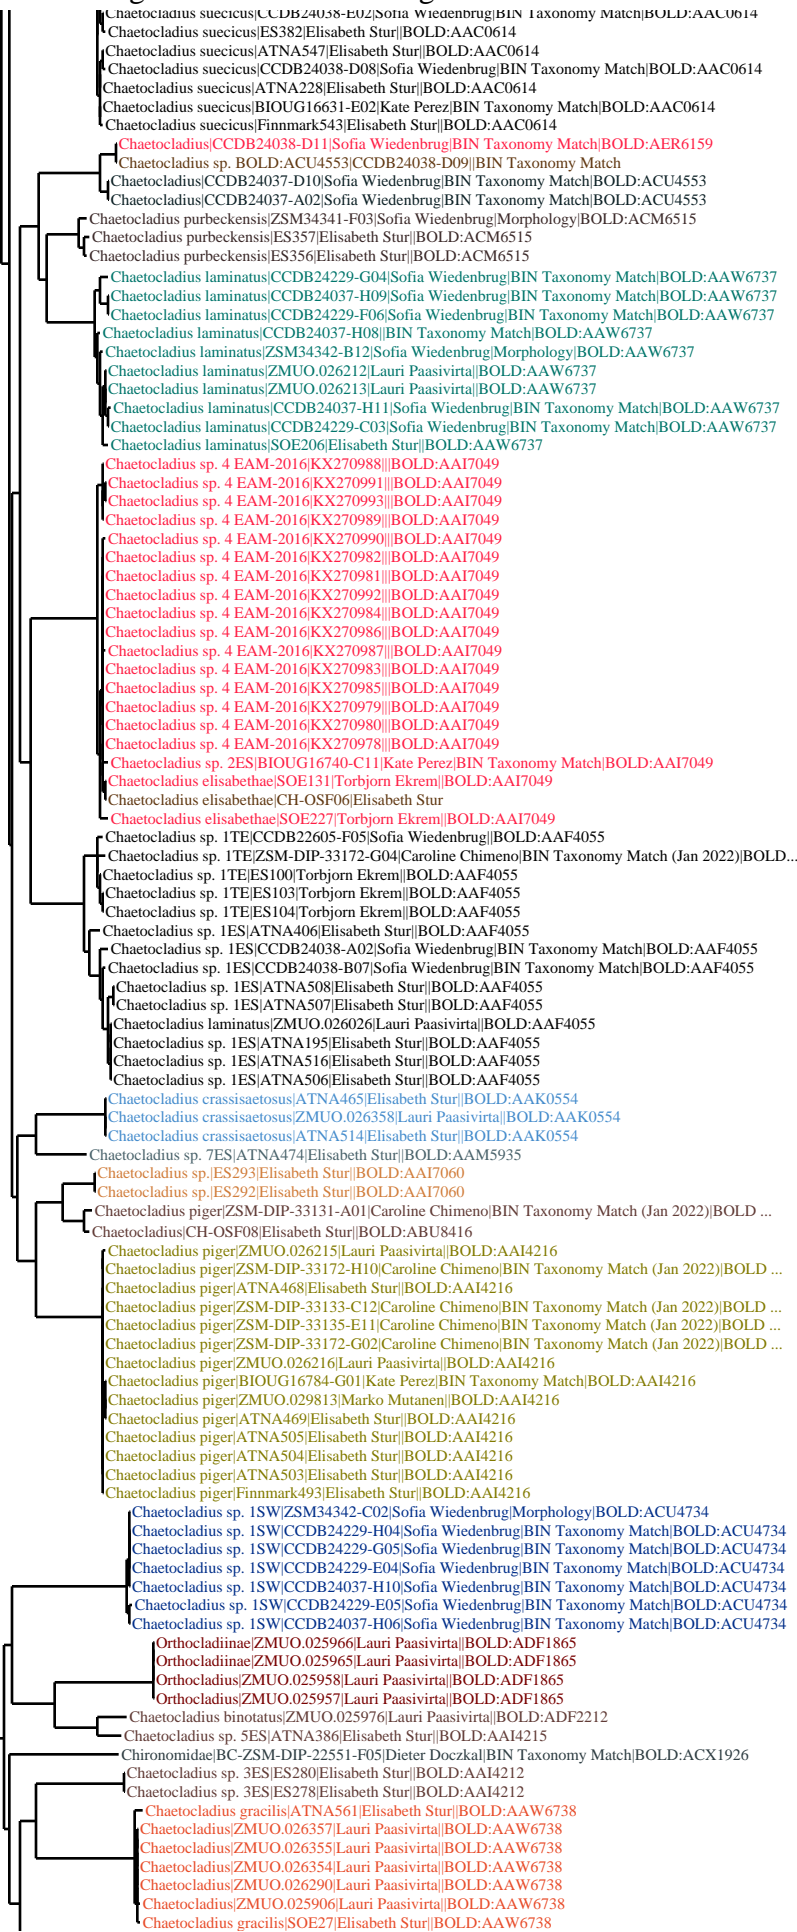

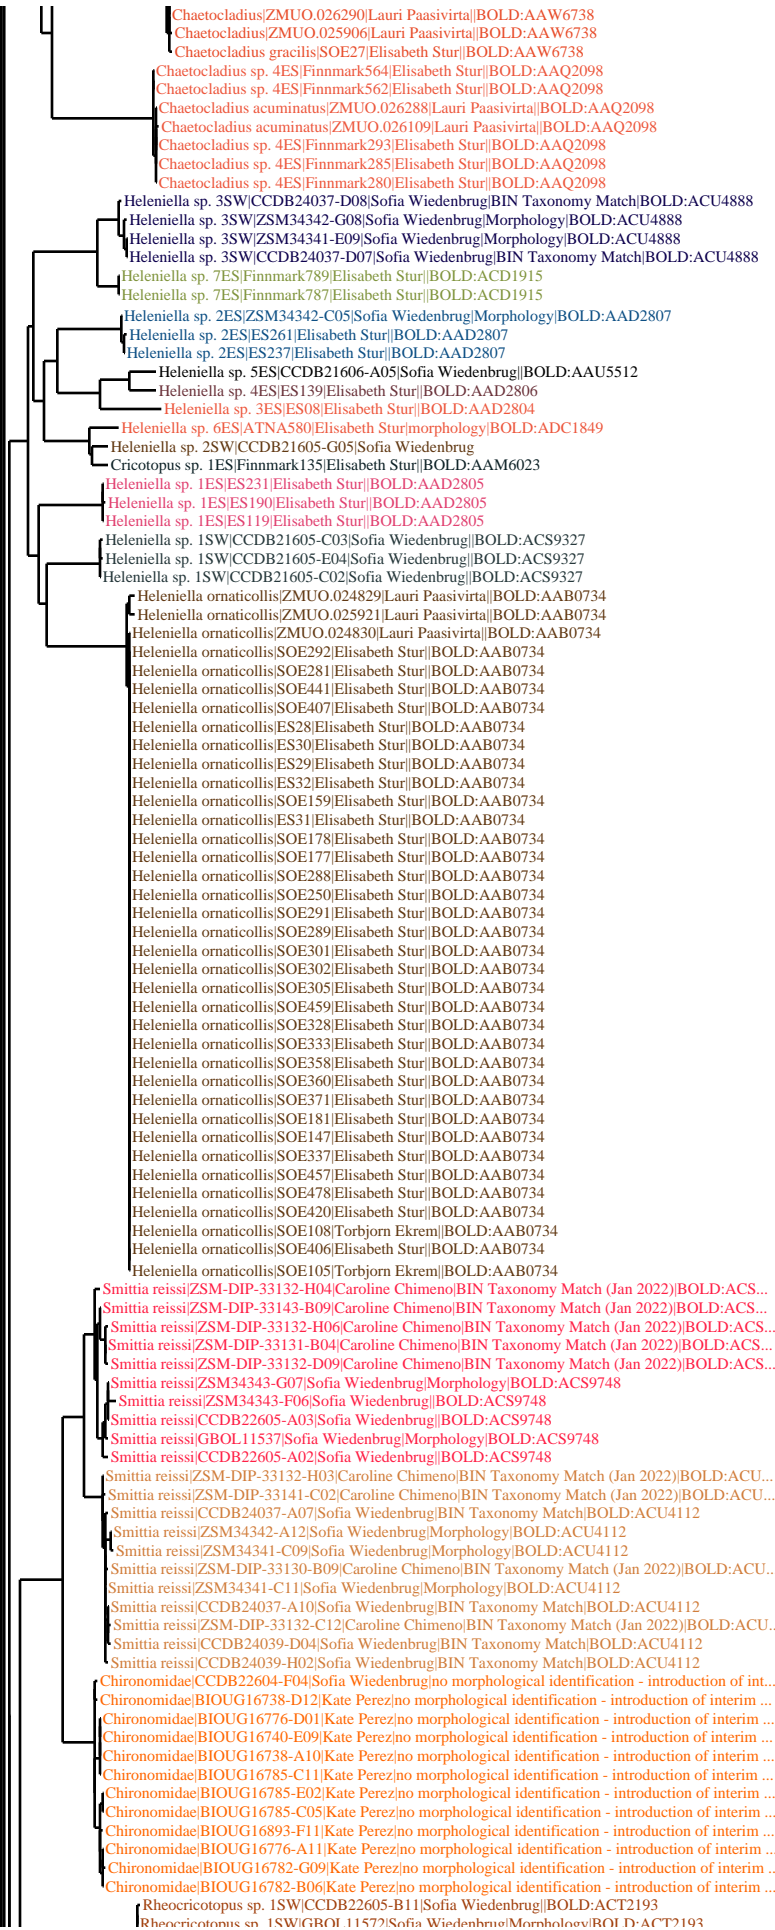



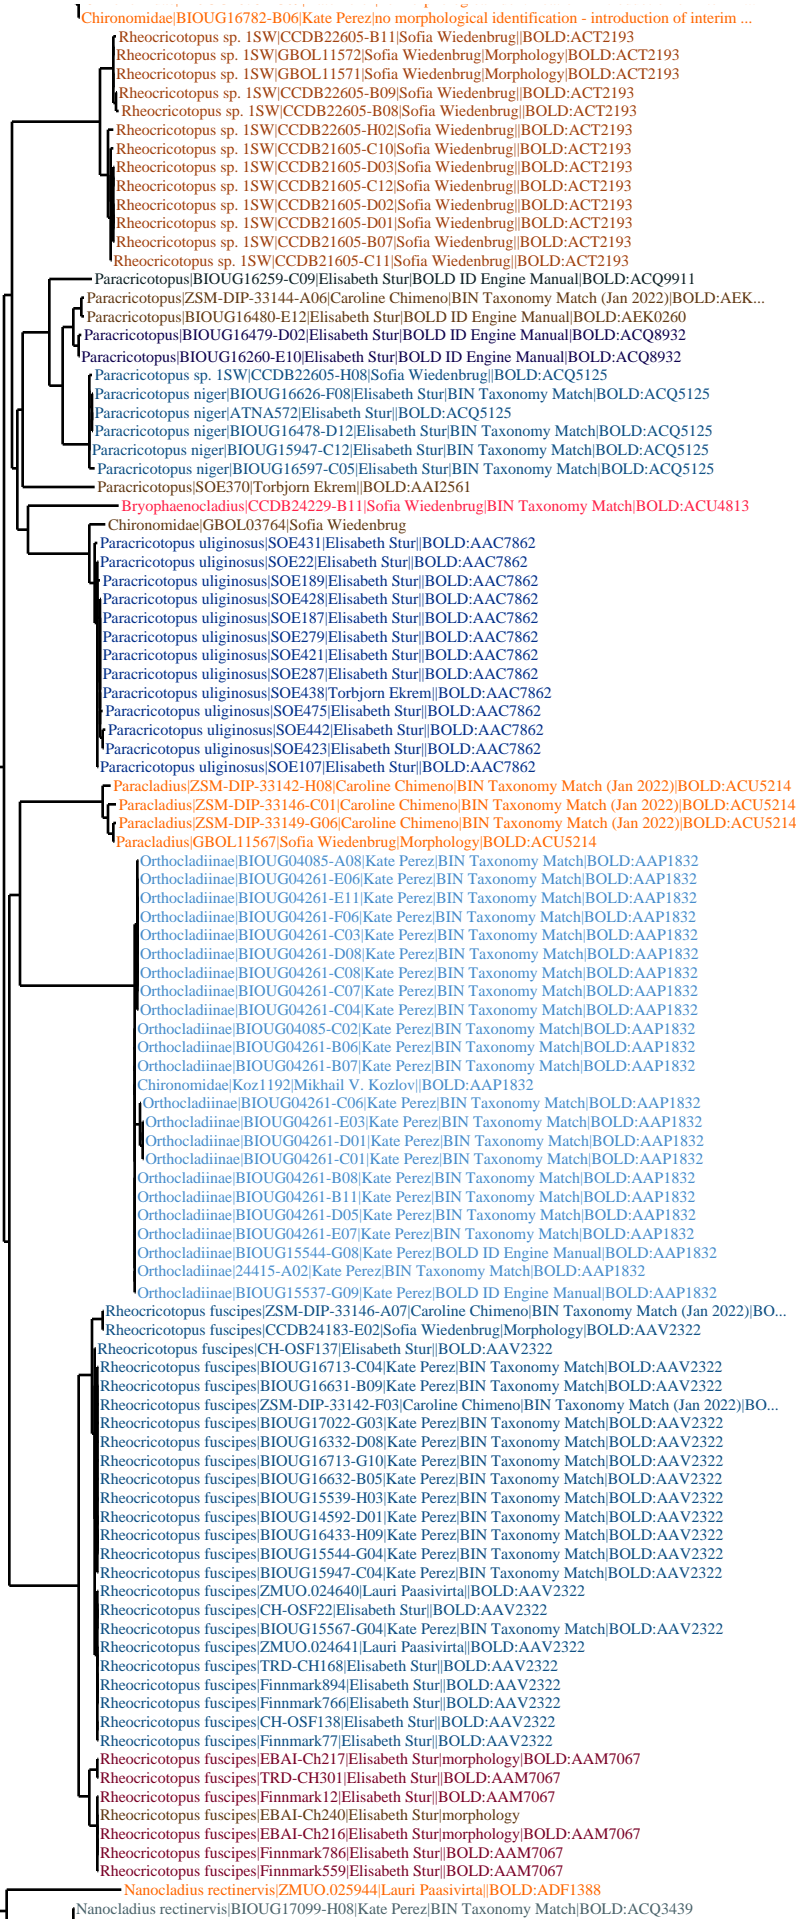

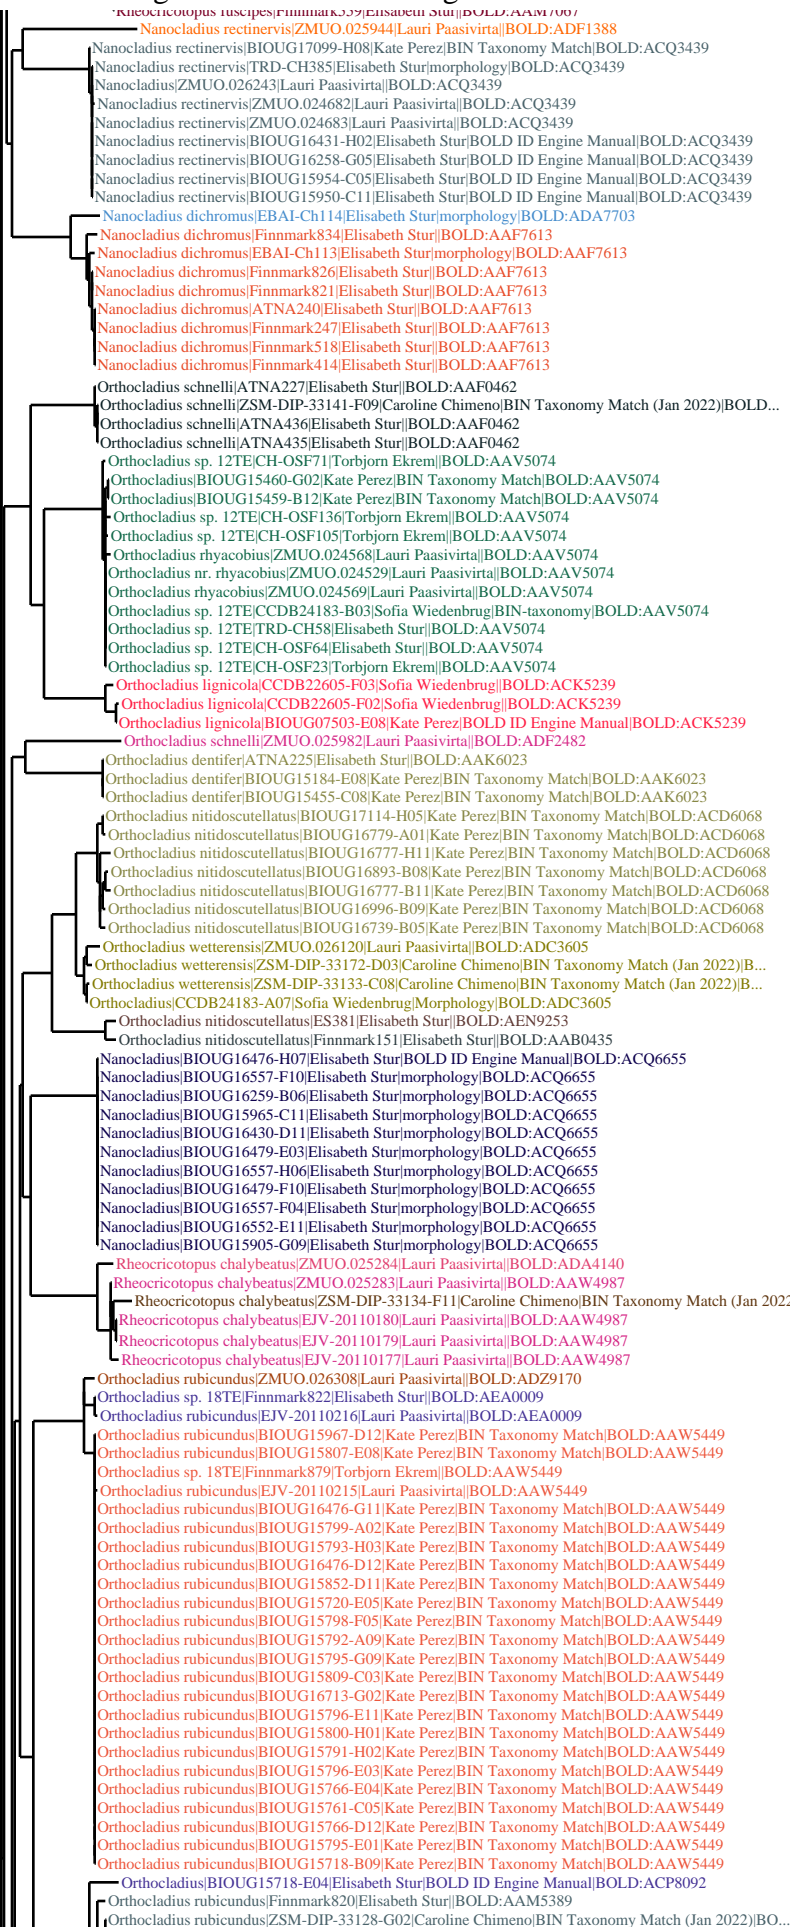

Orthocladius|BIOUG15718-E04|Elisabeth Stur|BOLD ID Engine Manual|BOLD:ACP8092  
 Orthocladius rubicundus|Finmark820|Elisabeth Stur|BOLD: AAM5389  
 Orthocladius rubicundus|ZSM-DIP-33128-G02|Caroline Chimeno|BIN Taxonomy Match (Jan 2022)|BO...  
 Orthocladius rubicundus|ZSM-DIP-33170-C02|Caroline Chimeno|BIN Taxonomy Match (Jan 2022)|BO...  
 Orthocladius rubicundus|ZSM-DIP-33170-D05|Caroline Chimeno|BIN Taxonomy Match (Jan 2022)|BO...  
 Orthocladius rubicundus|BIOUG16856-D11|Kate Perez|BIN Taxonomy Match|BOLD: AAM5389  
 Orthocladius rubicundus|BIOUG16854-F06|Kate Perez|BIN Taxonomy Match|BOLD: AAM5389  
 Orthocladius rubicundus|BIOUG16857-G12|Kate Perez|Tree base identification  
 Orthocladius rubicundus|ZMUO.024716|Lauri Paasivirta|BOLD: AAM5389  
 Orthocladius rubicundus|ZSM-DIP-33134-G07|Caroline Chimeno|BIN Taxonomy Match (Jan 2022)|BO...  
 Orthocladius rubicundus|BIOUG15853-H03|Kate Perez|BIN Taxonomy Match|BOLD: AAM5389  
 Orthocladius rubicundus|BIOUG15852-B05|Kate Perez|BIN Taxonomy Match|BOLD: AAM5389  
 Orthocladius rubicundus|BIOUG15718-G06|Kate Perez|BIN Taxonomy Match|BOLD: AAM5389  
 Orthocladius rubicundus|BIOUG15853-D10|Kate Perez|BIN Taxonomy Match|BOLD: AAM5389  
 Orthocladius rubicundus|BIOUG15853-F07|Kate Perez|BIN Taxonomy Match|BOLD: AAM5389  
 Orthocladius rubicundus|BIOUG15542-C09|Kate Perez|BIN Taxonomy Match|BOLD: AAM5389  
 Orthocladius rubicundus|BIOUG15649-G07|Kate Perez|BIN Taxonomy Match|BOLD: AAM5389  
 Orthocladius rubicundus|BIOUG16477-D02|Kate Perez|BIN Taxonomy Match|BOLD: AAM5389  
 Orthocladius rubicundus|BIOUG15719-F11|Kate Perez|BIN Taxonomy Match|BOLD: AAM5389  
 Orthocladius rubicundus|BIOUG15800-G09|Kate Perez|BIN Taxonomy Match|BOLD: AAM5389  
 Orthocladius rubicundus|BIOUG16330-C09|Kate Perez|BIN Taxonomy Match|BOLD: AAM5389  
 Orthocladius rubicundus|BIOUG15718-H02|Kate Perez|BIN Taxonomy Match|BOLD: AAM5389  
 Orthocladius rubicundus|BIOUG16435-H06|Kate Perez|BIN Taxonomy Match|BOLD: AAM5389  
 Orthocladius rubicundus|BIOUG16711-F01|Kate Perez|BIN Taxonomy Match|BOLD: AAM5389  
 Orthocladius rubicundus|BIOUG17022-A11|Kate Perez|BIN Taxonomy Match|BOLD: AAM5389  
 Orthocladius rubicundus|BIOUG15719-B10|Kate Perez|BIN Taxonomy Match|BOLD: AAM5389  
 Orthocladius rubicundus|BIOUG15720-A02|Kate Perez|BIN Taxonomy Match|BOLD: AAM5389  
 Orthocladius rubicundus|BIOUG15806-C03|Kate Perez|BIN Taxonomy Match|BOLD: AAM5389  
 Orthocladius rubicundus|BIOUG15964-C06|Kate Perez|BIN Taxonomy Match|BOLD: AAM5389  
 Orthocladius rubicundus|BIOUG15808-B08|Kate Perez|BIN Taxonomy Match|BOLD: AAM5389  
 Orthocladius rubicundus|BIOUG16259-C02|Kate Perez|BIN Taxonomy Match|BOLD: AAM5389  
 Orthocladius rubicundus|BIOUG15653-E06|Kate Perez|BIN Taxonomy Match|BOLD: AAM5389  
 Orthocladius rubicundus|BIOUG16477-F12|Kate Perez|BIN Taxonomy Match|BOLD: AAM5389  
 Orthocladius rubicundus|BIOUG16712-A03|Kate Perez|BIN Taxonomy Match|BOLD: AAM5389  
 Orthocladius rubicundus|BIOUG15761-H03|Kate Perez|BIN Taxonomy Match|BOLD: AAM5389  
 Orthocladius rubicundus|BIOUG16552-D11|Kate Perez|BIN Taxonomy Match|BOLD: AAM5389  
 Orthocladius rubicundus|BIOUG15796-A09|Kate Perez|BIN Taxonomy Match|BOLD: AAM5389  
 Orthocladius rubicundus|BIOUG15800-B02|Kate Perez|BIN Taxonomy Match|BOLD: AAM5389  
 Orthocladius rubicundus|BIOUG16430-F07|Kate Perez|BIN Taxonomy Match|BOLD: AAM5389  
 Orthocladius rubicundus|BIOUG16711-D06|Kate Perez|BIN Taxonomy Match|BOLD: AAM5389  
 Orthocladius rubicundus|BIOUG16712-A12|Kate Perez|BIN Taxonomy Match|BOLD: AAM5389  
 Orthocladius rubicundus|BIOUG17025-G04|Kate Perez|BIN Taxonomy Match|BOLD: AAM5389  
 Orthocladius rubicundus|BIOUG17064-F08|Kate Perez|BIN Taxonomy Match|BOLD: AAM5389  
 Orthocladius rubicundus|BIOUG16299-G03|Kate Perez|BIN Taxonomy Match|BOLD: AAM5389  
 Orthocladius rubicundus|BIOUG16205-C10|Kate Perez|BIN Taxonomy Match|BOLD: AAM5389  
 Orthocladius rubicundus|BIOUG16632-F12|Kate Perez|BIN Taxonomy Match|BOLD: AAM5389  
 Orthocladius rubicundus|BIOUG15543-G08|Kate Perez|BIN Taxonomy Match|BOLD: AAM5389  
 Orthocladius rubicundus|BIOUG16258-A12|Kate Perez|BIN Taxonomy Match|BOLD: AAM5389  
 Orthocladius rubicundus|BIOUG15653-A05|Kate Perez|BIN Taxonomy Match|BOLD: AAM5389  
 Orthocladius rubicundus|BIOUG17022-H02|Kate Perez|BIN Taxonomy Match|BOLD: AAM5389  
 Orthocladius rubicundus|BIOUG15593-E08|Kate Perez|BIN Taxonomy Match|BOLD: AAM5389  
 Orthocladius rubicundus|BIOUG15545-A06|Kate Perez|BIN Taxonomy Match|BOLD: AAM5389  
 Orthocladius rubicundus|BIOUG15796-D08|Kate Perez|BIN Taxonomy Match|BOLD: AAM5389  
 Orthocladius rubicundus|BIOUG16259-D05|Kate Perez|BIN Taxonomy Match|BOLD: AAM5389  
 Orthocladius rubicundus|BIOUG16435-H02|Kate Perez|BIN Taxonomy Match|BOLD: AAM5389  
 Orthocladius rubicundus|BIOUG16331-E03|Kate Perez|BIN Taxonomy Match|BOLD: AAM5389  
 Orthocladius rubicundus|BIOUG15595-E10|Kate Perez|BIN Taxonomy Match|BOLD: AAM5389  
 Orthocladius rubicundus|BIOUG16480-H05|Kate Perez|BIN Taxonomy Match|BOLD: AAM5389  
 Orthocladius rubicundus|BIOUG15950-F06|Kate Perez|BIN Taxonomy Match|BOLD: AAM5389  
 Orthocladius rubicundus|BIOUG15762-A04|Kate Perez|BIN Taxonomy Match|BOLD: AAM5389  
 Orthocladius rubicundus|BIOUG15765-B11|Kate Perez|BIN Taxonomy Match|BOLD: AAM5389  
 Orthocladius rubicundus|BIOUG16297-F05|Kate Perez|BIN Taxonomy Match|BOLD: AAM5389  
 Orthocladius rubicundus|BIOUG16430-C01|Kate Perez|BIN Taxonomy Match|BOLD: AAM5389  
 Orthocladius rubicundus|BIOUG15796-E12|Kate Perez|BIN Taxonomy Match|BOLD: AAM5389  
 Orthocladius rubicundus|BIOUG15652-G06|Kate Perez|BIN Taxonomy Match|BOLD: AAM5389  
 Orthocladius rubicundus|BIOUG16435-B02|Kate Perez|BIN Taxonomy Match|BOLD: AAM5389  
 Orthocladius rubicundus|BIOUG15795-D03|Kate Perez|BIN Taxonomy Match|BOLD: AAM5389  
 Orthocladius rubicundus|BIOUG16625-A04|Kate Perez|BIN Taxonomy Match|BOLD: AAM5389  
 Orthocladius rubicundus|BIOUG16432-E01|Kate Perez|BIN Taxonomy Match|BOLD: AAM5389  
 Orthocladius rubicundus|BIOUG16480-F02|Kate Perez|BIN Taxonomy Match|BOLD: AAM5389  
 Orthocladius rubicundus|BIOUG15536-F02|Kate Perez|BIN Taxonomy Match|BOLD: AAM5389  
 Orthocladius rubicundus|BIOUG15718-G12|Kate Perez|BIN Taxonomy Match|BOLD: AAM5389  
 Orthocladius rubicundus|BIOUG15718-D01|Kate Perez|BIN Taxonomy Match|BOLD: AAM5389  
 Orthocladius rubicundus|BIOUG15764-C06|Kate Perez|BIN Taxonomy Match|BOLD: AAM5389  
 Orthocladius rubicundus|BIOUG07504-E10|Kate Perez|BIN Taxonomy Match|BOLD: AAM5389  
 Orthocladius rubicundus|BIOUG15544-D10|Kate Perez|BIN Taxonomy Match|BOLD: AAM5389  
 Orthocladius rubicundus|BIOUG16632-G02|Kate Perez|BIN Taxonomy Match|BOLD: AAM5389  
 Orthocladius rubicundus|BIOUG16626-B12|Kate Perez|BIN Taxonomy Match|BOLD: AAM5389  
 Orthocladius rubicundus|BIOUG16476-F12|Kate Perez|BIN Taxonomy Match|BOLD: AAM5389  
 Orthocladius rubicundus|BIOUG15797-F04|Kate Perez|BIN Taxonomy Match|BOLD: AAM5389  
 Orthocladius rubicundus|BIOUG16430-A07|Kate Perez|BIN Taxonomy Match|BOLD: AAM5389  
 Orthocladius rubicundus|BIOUG15544-F05|Kate Perez|BIN Taxonomy Match|BOLD: AAM5389  
 Orthocladius rubicundus|BIOUG15762-G07|Kate Perez|BIN Taxonomy Match|BOLD: AAM5389  
 Orthocladius rubicundus|BIOUG15761-D10|Kate Perez|BIN Taxonomy Match|BOLD: AAM5389  
 Orthocladius rubicundus|BIOUG15718-D05|Kate Perez|BIN Taxonomy Match|BOLD: AAM5389  
 Orthocladius rubicundus|BIOUG17119-D12|Kate Perez|BIN Taxonomy Match|BOLD: AAM5389  
 Orthocladius rubicundus|ZSM-DIP-33128-A08|Caroline Chimeno|BIN Taxonomy Match (Jan 2022)|BO...  
 Orthocladius rubicundus|Finmark25|Torbjorn Ekrem|BOLD: AAM5389  
 Orthocladius rubicundus|Finmark819|Elisabeth Stur|BOLD: AAM5389  
 Orthocladius rubicundus|Finmark829|Elisabeth Stur|BOLD: AAM5389  
 Orthocladius rubicundus|BIOUG15600-C01|Kate Perez|BIN Taxonomy Match|BOLD: AAM5389  
 Orthocladius rubicundus|BIOUG15594-A09|Kate Perez|BIN Taxonomy Match|BOLD: AAM5389  
 Orthocladius rubicundus|BIOUG15800-C04|Kate Perez|BIN Taxonomy Match|BOLD: AAM5389  
 Orthocladius rubicundus|BIOUG15764-E05|Kate Perez|BIN Taxonomy Match|BOLD: AAM5389  
 Orthocladius rubicundus|BIOUG15806-G06|Kate Perez|BIN Taxonomy Match|BOLD: AAM5389  
 Orthocladius rubicundus|BIOUG16596-G04|Kate Perez|BIN Taxonomy Match|BOLD: AAM5389  
 Orthocladius rubicundus|BIOUG15766-B05|Kate Perez|BIN Taxonomy Match|BOLD: AAM5389  
 Orthocladius rubicundus|BIOUG16432-C08|Kate Perez|BIN Taxonomy Match|BOLD: AAM5389  
 Orthocladius rubicundus|BIOUG16205-C01|Kate Perez|BIN Taxonomy Match|BOLD: AAM5389  
 Orthocladius rubicundus|BIOUG16434-C02|Kate Perez|BIN Taxonomy Match|BOLD: AAM5389  
 Orthocladius rubicundus|BIOUG16433-H10|Kate Perez|BIN Taxonomy Match|BOLD: AAM5389  
 Orthocladius rubicundus|BIOUG16632-A09|Kate Perez|BIN Taxonomy Match|BOLD: AAM5389  
 Orthocladius rubicundus|BIOUG15766-A10|Kate Perez|BIN Taxonomy Match|BOLD: AAM5389

Orthocladius rubicundus|BIOUG16433-H10|Kate Perez|BIN Taxonomy Match|BOLD:AAM5389  
Orthocladius rubicundus|BIOUG16632-A09|Kate Perez|BIN Taxonomy Match|BOLD:AAM5389  
Orthocladius rubicundus|BIOUG15766-A10|Kate Perez|BIN Taxonomy Match|BOLD:AAM5389  
Orthocladius rubicundus|BIOUG15762-C05|Kate Perez|BIN Taxonomy Match|BOLD:AAM5389  
Orthocladius rubicundus|BIOUG15761-D07|Kate Perez|BIN Taxonomy Match|BOLD:AAM5389  
Orthocladius rubicundus|BIOUG15764-C02|Kate Perez|BIN Taxonomy Match|BOLD:AAM5389  
Orthocladius rubicundus|ZMUO.024717|Lauri Paasivirta|BOLD:AAM5389  
Orthocladius rubicundus|BIOUG16854-C06|Kate Perez|BIN Taxonomy Match|BOLD:AAM5389  
Orthocladius rubicundus|ZSM-DIP-33138-C09|Caroline Chimenjo|BIN Taxonomy Match (Jan 2022)|BO...  
Orthocladius rubicundus|BIOUG15852-F03|Kate Perez|BIN Taxonomy Match|BOLD:AAM5389  
Orthocladius rubicundus|BIOUG16632-F01|Kate Perez|BIN Taxonomy Match|BOLD:AAM5389  
Orthocladius rubicundus|BIOUG16632-H08|Kate Perez|BIN Taxonomy Match|BOLD:AAM5389  
Orthocladius rubicundus|BIOUG15765-D11|Kate Perez|BIN Taxonomy Match|BOLD:AAM5389  
Orthocladius rubicundus|BIOUG15561-E02|Kate Perez|BIN Taxonomy Match|BOLD:AAM5389  
Orthocladius rubicundus|BIOUG15800-E04|Kate Perez|BIN Taxonomy Match|BOLD:AAM5389  
Orthocladius rubicundus|BIOUG15963-E02|Kate Perez|BIN Taxonomy Match|BOLD:AAM5389  
Orthocladius rubicundus|BIOUG16479-B04|Kate Perez|BIN Taxonomy Match|BOLD:AAM5389  
Orthocladius rubicundus|BIOUG15652-C12|Kate Perez|BIN Taxonomy Match|BOLD:AAM5389  
Orthocladius rubicundus|BIOUG15951-G04|Kate Perez|BIN Taxonomy Match|BOLD:AAM5389  
Orthocladius rubicundus|BIOUG15764-B10|Kate Perez|BIN Taxonomy Match|BOLD:AAM5389  
Orthocladius decoratus|ZMUO.026196|Lauri Paasivirta|BOLD:ABW7975  
Orthocladius decoratus|ZMUO.026195|Lauri Paasivirta|BOLD:ABW7975  
Orthocladius rivinus|KY225335||BOLD:ADT0553  
Orthocladius oblidens|PK-192-181|Petra Kranzfelder|morphology  
Orthocladius oblidens|NHRS-BYWS000001094|Yngve Brodin|morphology|BOLD:AAD8971  
Orthocladius oblidens|BIOUG16631-H11|Kate Perez|BIN Taxonomy Match|BOLD:AAD8971  
Orthocladius oblidens|BIOUG16712-H04|Kate Perez|BIN Taxonomy Match|BOLD:AAD8971  
Orthocladius oblidens|BIOUG16261-E04|Kate Perez|BIN Taxonomy Match|BOLD:AAD8971  
Orthocladius oblidens|BIOUG15719-F09|Kate Perez|BIN Taxonomy Match|BOLD:AAD8971  
Orthocladius oblidens|BIOUG16625-E04|Kate Perez|BIN Taxonomy Match|BOLD:AAD8971  
Orthocladius oblidens|BIOUG16712-F01|Kate Perez|BIN Taxonomy Match|BOLD:AAD8971  
Orthocladius oblidens|BIOUG16631-B03|Kate Perez|BIN Taxonomy Match|BOLD:AAD8971  
Orthocladius oblidens|BIOUG16296-H03|Kate Perez|BIN Taxonomy Match|BOLD:AAD8971  
Orthocladius oblidens|BIOUG17022-H10|Kate Perez|BIN Taxonomy Match|BOLD:AAD8971  
Orthocladius oblidens|BIOUG16631-E09|Kate Perez|BIN Taxonomy Match|BOLD:AAD8971  
Orthocladius oblidens|BIOUG16625-C11|Kate Perez|BIN Taxonomy Match|BOLD:AAD8971  
Orthocladius oblidens|BIOUG16711-D10|Kate Perez|BIN Taxonomy Match|BOLD:AAD8971  
Orthocladius oblidens|NHRS-BYWS000001798|Yngve Brodin|BOLD:AAD8971  
Orthocladius oblidens|BIOUG16631-D07|Kate Perez|BIN Taxonomy Match|BOLD:AAD8971  
Orthocladius oblidens|BIOUG15719-B09|Kate Perez|BIN Taxonomy Match|BOLD:AAD8971  
Orthocladius oblidens|BIOUG16632-G11|Kate Perez|BIN Taxonomy Match|BOLD:AAD8971  
Orthocladius oblidens|NHRS-BYWS000001137|Yngve Brodin|morphology|BOLD:AAD8971  
Orthocladius oblidens|NHRS-BYWS000001813|Yngve Brodin|BOLD:AAD8971  
Orthocladius oblidens|BIOUG17303-A10|Kate Perez|BIN Taxonomy Match|BOLD:AAD8971  
Orthocladius decoratus|ZMUO.025264|Lauri Paasivirta|BOLD:AAD8971  
Orthocladius oblidens|NHRS-BYWS000000388|Yngve Brodin|morphology|BOLD:AAD8971  
Orthocladius|BIOUG42676-G01|Kate Perez|BIN Taxonomy Match below Phylum (Jun 2019)|BOLD:A...  
Orthocladius oblidens|NHRS-BYWS000000517|Yngve Brodin|morphology|BOLD:AAD8971  
Orthocladius oblidens|NHRS-BYWS000000430|Yngve Brodin|morphology|BOLD:AAD8971  
Orthocladius oblidens|NHRS-BYWS000001788|Yngve Brodin|BOLD:AAD8971  
Orthocladius oblidens|BIOUG16296-A09|Kate Perez|BIN Taxonomy Match|BOLD:AAD8971  
Orthocladius oblidens|EBAI-Ch241|Elisabeth Stur|morphology|BOLD:AAD8971  
Orthocladius oblidens|BIOUG16711-E04|Kate Perez|BIN Taxonomy Match|BOLD:AAD8971  
Orthocladius oblidens|BIOUG16333-E04|Kate Perez|BIN Taxonomy Match|BOLD:AAD8971  
Orthocladius oblidens|BIOUG16625-D06|Kate Perez|BIN Taxonomy Match|BOLD:AAD8971  
Orthocladius oblidens|BIOUG16625-C09|Kate Perez|BIN Taxonomy Match|BOLD:AAD8971  
Orthocladius oblidens|BIOUG15598-F02|Kate Perez|BIN Taxonomy Match|BOLD:AAD8971  
Orthocladius oblidens|BIOUG16625-G08|Kate Perez|BIN Taxonomy Match|BOLD:AAD8971  
Orthocladius oblidens|BIOUG16712-C10|Kate Perez|BIN Taxonomy Match|BOLD:AAD8971  
Orthocladius oblidens|PK-192-191|Petra Kranzfelder|morphology  
Orthocladius oblidens|Finmark818|Elisabeth Stur|BOLD:AAD8971  
Orthocladius oblidens|BIOUG15761-G07|Kate Perez|BIN Taxonomy Match|BOLD:AAD8971  
Orthocladius oblidens|NHRS-BYWS000000135|Yngve Brodin|morphology|BOLD:AAD8971  
Orthocladius oblidens|NHRS-BYWS000000431|Yngve Brodin|morphology|BOLD:AAD8971  
Orthocladius oblidens|NHRS-BYWS000000146|Yngve Brodin|morphology|BOLD:AAD8971  
Orthocladius oblidens|NHRS-BYWS000000546|Yngve Brodin|morphology|BOLD:AAD8971  
Orthocladius oblidens|BIOUG16331-D03|Kate Perez|BIN Taxonomy Match|BOLD:AAD8971  
Orthocladius oblidens|BIOUG15720-A07|Kate Perez|BIN Taxonomy Match|BOLD:AAD8971  
Orthocladius oblidens|BIOUG16299-F07|Kate Perez|BIN Taxonomy Match|BOLD:AAD8971  
Orthocladius oblidens|BIOUG16632-E12|Kate Perez|BIN Taxonomy Match|BOLD:AAD8971  
Orthocladius oblidens|BIOUG16296-D02|Kate Perez|BIN Taxonomy Match|BOLD:AAD8971  
Orthocladius oblidens|NHRS-BYWS000001797|Yngve Brodin|BOLD:AAD8971  
Orthocladius oblidens|BIOUG16333-G12|Kate Perez|BIN Taxonomy Match|BOLD:AAD8971  
Orthocladius oblidens|BIOUG16299-H01|Kate Perez|BIN Taxonomy Match|BOLD:AAD8971  
Orthocladius oblidens|BIOUG16477-A09|Kate Perez|BIN Taxonomy Match|BOLD:AAD8971  
Orthocladius oblidens|BIOUG16625-A01|Kate Perez|BIN Taxonomy Match|BOLD:AAD8971  
Orthocladius oblidens|BIOUG16296-A07|Kate Perez|BIN Taxonomy Match|BOLD:AAD8971  
Orthocladius oblidens|BIOUG16713-H04|Kate Perez|BIN Taxonomy Match|BOLD:AAD8971  
Orthocladius oblidens|BIOUG16631-H01|Kate Perez|BIN Taxonomy Match|BOLD:AAD8971  
Orthocladius oblidens|BIOUG16711-A01|Kate Perez|BIN Taxonomy Match|BOLD:AAD8971  
Orthocladius oblidens|BIOUG16596-D11|Kate Perez|BIN Taxonomy Match|BOLD:AAD8971  
Orthocladius oblidens|BIOUG15762-G06|Kate Perez|BIN Taxonomy Match|BOLD:AAD8971  
Orthocladius oblidens|BIOUG16625-D07|Kate Perez|BIN Taxonomy Match|BOLD:AAD8971  
Orthocladius oblidens|BIOUG16713-E03|Kate Perez|BIN Taxonomy Match|BOLD:AAD8971  
Orthocladius oblidens|BIOUG15718-G05|Kate Perez|BIN Taxonomy Match|BOLD:AAD8971  
Orthocladius oblidens|BIOUG16632-C09|Kate Perez|BIN Taxonomy Match|BOLD:AAD8971  
Orthocladius oblidens|BIOUG16713-E08|Kate Perez|BIN Taxonomy Match|BOLD:AAD8971  
Orthocladius oblidens|BIOUG16713-G01|Kate Perez|BIN Taxonomy Match|BOLD:AAD8971  
Orthocladius oblidens|BIOUG16712-B12|Kate Perez|BIN Taxonomy Match|BOLD:AAD8971  
Orthocladius oblidens|BIOUG15853-F01|Kate Perez|BIN Taxonomy Match|BOLD:AAD8971  
Orthocladius oblidens|BIOUG17064-D11|Kate Perez|BIN Taxonomy Match|BOLD:AAD8971  
Orthocladius oblidens|BIOUG17065-B07|Kate Perez|BIN Taxonomy Match|BOLD:AAD8971  
Orthocladius oblidens|BIOUG16626-B11|Kate Perez|BIN Taxonomy Match|BOLD:AAD8971  
Orthocladius oblidens|NHRS-BYWS000000264|Yngve Brodin|morphology|BOLD:AAD8971  
Orthocladius oblidens|NHRS-BYWS000000470|Yngve Brodin|morphology|BOLD:AAD8971  
Orthocladius oblidens|NHRS-BYWS000000433|Yngve Brodin|morphology|BOLD:AAD8971  
Orthocladius oblidens|NHRS-BYWS000001864|Yngve Brodin|BOLD:AAD8971  
Orthocladius oblidens|ZMUO.025258|Lauri Paasivirta|BOLD:AAD8971  
Orthocladius oblidens|ZMUO.025257|Lauri Paasivirta|BOLD:AAD8971  
Orthocladius oblidens|NHRS-BYWS000001803|Yngve Brodin|BOLD:AAD8971  
Orthocladius oblidens|BIOUG15765-E09|Kate Perez|BIN Taxonomy Match|BOLD:AAD8971  
Orthocladius oblidens|BIOUG15718-A03|Kate Perez|BIN Taxonomy Match|BOLD:AAD8971  
Orthocladius oblidens|10PE|Egmond|150|Foshier|Egmond|BOLD:AAD8971

Orthocladius oblidens|BIOUG15765-E09|Kate Perez|BIN Taxonomy Match|BOLD:AAD8971  
 Orthocladius oblidens|BIOUG15718-A03|Kate Perez|BIN Taxonomy Match|BOLD:AAD8971  
 Orthocladius sp. 10TE|Finmark150|Torbjorn Ekrem|BOLD:AAP6053  
 Orthocladius excavatus|ZMUO.025248|Lauri Paasivirta|BOLD:AEC8098  
 Orthocladius decoratus|ZMUO.025263|Lauri Paasivirta|BOLD:AEC8098  
 Orthocladius excavatus|ZMUO.025247|Lauri Paasivirta|BOLD:AEC8098  
 Orthocladius|ZMUO.025917|Lauri Paasivirta|BOLD:ADF2287  
 Orthocladius decoratus|ATNA471|Torbjorn Ekrem|BOLD:AAE4990  
 Orthocladinae|ZMUO.025962|Lauri Paasivirta|BOLD:ACM0243  
 Orthocladinae|ZMUO.025961|Lauri Paasivirta|BOLD:ACM0243  
 Orthocladius lamellatus|ZMUO.025868|Lauri Paasivirta|BOLD:ACM0243  
 Orthocladius|ZMUO.025916|Lauri Paasivirta|BOLD:ACM0243  
 Orthocladius|BIOUG16894-C01|Jerome Moriniere|BIN Taxonomy Match|BOLD:ACR1772  
 Orthocladius|BIOUG16859-H02|Jerome Moriniere|BIN Taxonomy Match|BOLD:ACR1772  
 Orthocladius|BIOUG16893-D07|Jerome Moriniere|BIN Taxonomy Match|BOLD:ACR1772  
 Orthocladius|BIOUG16777-A01|Jerome Moriniere|BIN Taxonomy Match|BOLD:ACR1772  
 Orthocladius|BIOUG16776-H04|Jerome Moriniere|BIN Taxonomy Match|BOLD:ACR1772  
 Orthocladius|BIOUG16996-B04|Jerome Moriniere|BIN Taxonomy Match|BOLD:ACR1773  
 Orthocladius|BIOUG16782-F02|Jerome Moriniere|BIN Taxonomy Match|BOLD:ACR1773  
 Orthocladius|BIOUG16855-G07|Jerome Moriniere|BIN Taxonomy Match|BOLD:ACR1773  
 Orthocladius|BIOUG16856-A02|Jerome Moriniere|BIN Taxonomy Match|BOLD:ACR1773  
 Orthocladius|BIOUG16859-F05|Jerome Moriniere|BIN Taxonomy Match|BOLD:ACR1773  
 Orthocladius|BIOUG16855-H11|Jerome Moriniere|BIN Taxonomy Match|BOLD:ACR1773  
 Orthocladius|BIOUG16892-F12|Jerome Moriniere|BIN Taxonomy Match|BOLD:ACR1773  
 Orthocladius|BIOUG16893-G01|Jerome Moriniere|BIN Taxonomy Match|BOLD:ACR1773  
 Orthocladius|BIOUG16853-F06|Jerome Moriniere|BIN Taxonomy Match|BOLD:ACR1773  
 Orthocladius|BIOUG16854-A02|Jerome Moriniere|BIN Taxonomy Match|BOLD:ACR1773  
 Orthocladius|BIOUG16856-E07|Jerome Moriniere|BIN Taxonomy Match|BOLD:ACR1773  
 Orthocladius|BIOUG16892-H02|Jerome Moriniere|BIN Taxonomy Match|BOLD:ACR1773  
 Orthocladius|BIOUG16776-C02|Jerome Moriniere|BIN Taxonomy Match|BOLD:ACR1773  
 Orthocladius|BIOUG16778-F10|Jerome Moriniere|BIN Taxonomy Match|BOLD:ACR1773  
 Orthocladius|BIOUG16783-F06|Jerome Moriniere|BIN Taxonomy Match|BOLD:ACR1773  
 Orthocladius|BIOUG16857-F01|Kate Perez|BOLD ID Engine Manual|BOLD:ACR0587  
 Orthocladius|BIOUG16783-B03|Kate Perez|BOLD ID Engine Manual|BOLD:ACR0587  
 Orthocladius|BIOUG16856-B09|Kate Perez|BOLD ID Engine Manual|BOLD:ACR0587  
 Orthocladius|BIOUG16740-D11|Kate Perez|BOLD ID Engine Manual|BOLD:ACR0587  
 Orthocladius|BIOUG16740-H05|Kate Perez|BOLD ID Engine Manual|BOLD:ACR0587  
 Orthocladius|BIOUG16892-B06|Kate Perez|BOLD ID Engine Manual|BOLD:ACR0587  
 Orthocladius|BIOUG16782-C08|Kate Perez|BOLD ID Engine Manual|BOLD:ACR0587  
 Orthocladius|BIOUG16857-E05|Kate Perez|BOLD ID Engine Manual|BOLD:ACR0587  
 Orthocladius|BIOUG16853-D09|Kate Perez|BOLD ID Engine Manual|BOLD:ACR0587  
 Orthocladius|BIOUG16892-G04|Kate Perez|BOLD ID Engine Manual|BOLD:ACR0587  
 Orthocladius|BIOUG17137-C01|Kate Perez|BOLD ID Engine Manual|BOLD:ACR0587  
 Orthocladius|BIOUG16855-E04|Kate Perez|BOLD ID Engine Manual|BOLD:ACR0587  
 Orthocladius|BIOUG16775-C07|Kate Perez|BOLD ID Engine Manual|BOLD:ACR0587  
 Orthocladius|BIOUG16859-C08|Kate Perez|BOLD ID Engine Manual|BOLD:ACR0587  
 Orthocladius|BIOUG16855-G12|Kate Perez|BOLD ID Engine Manual|BOLD:ACR0587  
 Orthocladius|BIOUG16893-C03|Kate Perez|BOLD ID Engine Manual|BOLD:ACR0587  
 Orthocladius|BIOUG16853-C05|Kate Perez|BOLD ID Engine Manual|BOLD:ACR0587  
 Orthocladius|BIOUG16853-D10|Kate Perez|BOLD ID Engine Manual|BOLD:ACR0587  
 Orthocladius|BIOUG16859-C05|Kate Perez|BOLD ID Engine Manual|BOLD:ACR0587  
 Orthocladius|BIOUG16859-F11|Kate Perez|BOLD ID Engine Manual|BOLD:ACR0587  
 Orthocladius|BIOUG16859-E04|Kate Perez|BOLD ID Engine Manual|BOLD:ACR0587  
 Orthocladius|BIOUG16893-D02|Kate Perez|BOLD ID Engine Manual|BOLD:ACR0587  
 Orthocladius|BIOUG16856-B06|Kate Perez|BOLD ID Engine Manual|BOLD:ACR0587  
 Orthocladius|BIOUG16856-A11|Kate Perez|BOLD ID Engine Manual|BOLD:ACR0587  
 Orthocladius|BIOUG16856-F06|Kate Perez|BOLD ID Engine Manual|BOLD:ACR0587  
 Orthocladius|BIOUG16783-A09|Kate Perez|BOLD ID Engine Manual|BOLD:ACR0587  
 Orthocladius|BIOUG16859-F04|Kate Perez|BOLD ID Engine Manual|BOLD:ACR0587  
 Orthocladius|BIOUG16854-H07|Kate Perez|BOLD ID Engine Manual|BOLD:ACR0587  
 Orthocladius|BIOUG16777-F01|Kate Perez|BOLD ID Engine Manual|BOLD:ACR0587  
 Orthocladius|BIOUG16739-F02|Kate Perez|BOLD ID Engine Manual|BOLD:ACR0587  
 Orthocladius|BIOUG16856-G12|Kate Perez|BOLD ID Engine Manual|BOLD:ACR0587  
 Orthocladius|BIOUG17114-B05|Kate Perez|BOLD ID Engine Manual|BOLD:ACR0587  
 Orthocladius|BIOUG16892-H06|Kate Perez|BOLD ID Engine Manual|BOLD:ACR0587  
 Orthocladius|BIOUG16785-H10|Kate Perez|BOLD ID Engine Manual|BOLD:ACR0587  
 Orthocladius|BIOUG16857-B06|Kate Perez|BOLD ID Engine Manual|BOLD:ACR0587  
 Orthocladius|BIOUG16891-H11|Kate Perez|BOLD ID Engine Manual|BOLD:ACR0587  
 Orthocladius|BIOUG16856-B03|Kate Perez|BOLD ID Engine Manual|BOLD:ACR0587  
 Orthocladius|BIOUG16739-E04|Kate Perez|BOLD ID Engine Manual|BOLD:ACR0587  
 Orthocladius|BIOUG16893-F04|Kate Perez|BIN Taxonomy Match|BOLD:ACP2182  
 Orthocladius|BIOUG16893-E10|Kate Perez|BIN Taxonomy Match|BOLD:ACP2182  
 Orthocladius|BIOUG16857-D12|Kate Perez|BIN Taxonomy Match|BOLD:ACP2182  
 Orthocladius|BIOUG16857-H11|Kate Perez|BIN Taxonomy Match|BOLD:ACP2182  
 Orthocladius|BIOUG16782-C07|Kate Perez|BIN Taxonomy Match|BOLD:ACP2182  
 Orthocladius|BIOUG16859-B01|Kate Perez|BIN Taxonomy Match|BOLD:ACP2182  
 Orthocladius|BIOUG16859-B11|Kate Perez|BIN Taxonomy Match|BOLD:ACP2182  
 Orthocladius|BIOUG16894-D02|Kate Perez|BIN Taxonomy Match|BOLD:ACP2182  
 Orthocladius|BIOUG16893-F01|Kate Perez|BIN Taxonomy Match|BOLD:ACP2182  
 Orthocladius|BIOUG16857-F04|Kate Perez|BIN Taxonomy Match|BOLD:ACP2182  
 Orthocladius|BIOUG16784-H08|Kate Perez|BIN Taxonomy Match|BOLD:ACP2182  
 Orthocladius|BIOUG16853-G02|Kate Perez|BIN Taxonomy Match|BOLD:ACP2182  
 Orthocladius|BIOUG16859-D03|Kate Perez|BIN Taxonomy Match|BOLD:ACP2182  
 Orthocladius|BIOUG16721-H09|Kate Perez|BIN Taxonomy Match|BOLD:ACP2182  
 Orthocladius|BIOUG16857-D02|Kate Perez|BIN Taxonomy Match|BOLD:ACP2182  
 Orthocladius|BIOUG16738-D11|Kate Perez|BIN Taxonomy Match|BOLD:ACP2182  
 Orthocladius|BIOUG16776-E01|Kate Perez|BIN Taxonomy Match|BOLD:ACP2182  
 Orthocladius|BIOUG16859-C06|Kate Perez|BIN Taxonomy Match|BOLD:ACP2182  
 Orthocladius|BIOUG16783-B04|Kate Perez|BIN Taxonomy Match|BOLD:ACP2182  
 Orthocladius|BIOUG16721-B05|Kate Perez|BIN Taxonomy Match|BOLD:ACP2182  
 Orthocladius|BIOUG16721-H04|Kate Perez|BIN Taxonomy Match|BOLD:ACP2182  
 Orthocladius|BIOUG16785-H03|Kate Perez|BIN Taxonomy Match|BOLD:ACP2182  
 Orthocladius|BIOUG16859-F08|Kate Perez|BIN Taxonomy Match|BOLD:ACP2182  
 Orthocladius|BIOUG16894-C06|Kate Perez|BIN Taxonomy Match|BOLD:ACP2182  
 Orthocladius|BIOUG16778-F12|Kate Perez|BIN Taxonomy Match|BOLD:ACP2182  
 Orthocladius|BIOUG16775-A09|Kate Perez|BIN Taxonomy Match|BOLD:ACP2182  
 Orthocladius|BIOUG16857-F11|Kate Perez|BIN Taxonomy Match|BOLD:ACP2182  
 Orthocladius|BIOUG16894-A07|Kate Perez|BIN Taxonomy Match|BOLD:ACP2182  
 Orthocladius|BIOUG16894-A08|Kate Perez|BIN Taxonomy Match|BOLD:ACP2182  
 Orthocladius|BIOUG16892-E04|Kate Perez|BIN Taxonomy Match|BOLD:ACP2182  
 Orthocladius|BIOUG16892-D08|Kate Perez|BIN Taxonomy Match|BOLD:ACP2182  
 Orthocladius|BIOUG16856-C12|Kate Perez|BIN Taxonomy Match|BOLD:ACP2182

Orthocladus|BIOUG16892-E04|Kate Perez|BIN Taxonomy Match|BOLD:ACP2182  
 Orthocladus|BIOUG16892-D08|Kate Perez|BIN Taxonomy Match|BOLD:ACP2182  
 Orthocladus|BIOUG16856-C12|Kate Perez|BIN Taxonomy Match|BOLD:ACP2182  
 Orthocladus|BIOUG16855-G02|Kate Perez|BIN Taxonomy Match|BOLD:ACP2182  
 Orthocladus|BIOUG16855-D01|Kate Perez|BIN Taxonomy Match|BOLD:ACP2182  
 Orthocladus|BIOUG16855-C11|Kate Perez|BIN Taxonomy Match|BOLD:ACP2182  
 Orthocladus|BIOUG16855-C09|Kate Perez|BIN Taxonomy Match|BOLD:ACP2182  
 Orthocladus|BIOUG16855-B07|Kate Perez|BIN Taxonomy Match|BOLD:ACP2182  
 Orthocladus|BIOUG16854-H08|Kate Perez|BIN Taxonomy Match|BOLD:ACP2182  
 Orthocladus|BIOUG16856-F02|Kate Perez|BIN Taxonomy Match|BOLD:ACP2182  
 Orthocladus|BIOUG16893-E02|Kate Perez|BIN Taxonomy Match|BOLD:ACP2182  
 Orthocladus|BIOUG16893-A09|Kate Perez|BIN Taxonomy Match|BOLD:ACP2182  
 Orthocladus|BIOUG16853-G05|Kate Perez|BIN Taxonomy Match|BOLD:ACP2182  
 Orthocladus|BIOUG16893-G12|Kate Perez|BIN Taxonomy Match|BOLD:ACP2182  
 Orthocladus|BIOUG16855-F11|Kate Perez|BIN Taxonomy Match|BOLD:ACP2182  
 Orthocladus|BIOUG16854-D02|Kate Perez|BIN Taxonomy Match|BOLD:ACP2182  
 Orthocladus|BIOUG16854-D03|Kate Perez|BIN Taxonomy Match|BOLD:ACP2182  
 Orthocladus|BIOUG16854-D06|Kate Perez|BIN Taxonomy Match|BOLD:ACP2182  
 Orthocladus|BIOUG16854-E02|Kate Perez|BIN Taxonomy Match|BOLD:ACP2182  
 Orthocladus|BIOUG16856-F01|Kate Perez|BIN Taxonomy Match|BOLD:ACP2182  
 Orthocladus|BIOUG16856-G06|Kate Perez|BIN Taxonomy Match|BOLD:ACP2182  
 Orthocladus|BIOUG16859-A10|Kate Perez|BIN Taxonomy Match|BOLD:ACP2182  
 Orthocladus|BIOUG16892-C07|Kate Perez|BIN Taxonomy Match|BOLD:ACP2182  
 Orthocladus|BIOUG16856-F04|Kate Perez|BIN Taxonomy Match|BOLD:ACP2182  
 Orthocladus|BIOUG16892-H10|Kate Perez|BIN Taxonomy Match|BOLD:ACP2182  
 Orthocladus|BIOUG16892-D10|Kate Perez|BIN Taxonomy Match|BOLD:ACP2182  
 Orthocladus|BIOUG16892-B04|Kate Perez|BIN Taxonomy Match|BOLD:ACP2182  
 Orthocladus|BIOUG16857-C05|Kate Perez|BIN Taxonomy Match|BOLD:ACP2182  
 Orthocladus|BIOUG16857-A12|Kate Perez|BIN Taxonomy Match|BOLD:ACP2182  
 Orthocladus|BIOUG16855-E10|Kate Perez|BIN Taxonomy Match|BOLD:ACP2182  
 Orthocladus|BIOUG16721-E06|Kate Perez|BIN Taxonomy Match|BOLD:ACP2182  
 Orthocladus|BIOUG16893-C01|Kate Perez|BIN Taxonomy Match|BOLD:ACP2182  
 Orthocladus|BIOUG16785-H11|Kate Perez|BIN Taxonomy Match|BOLD:ACP2182  
 Orthocladus|BIOUG16856-C07|Kate Perez|BIN Taxonomy Match|BOLD:ACP2182  
 Orthocladus|BIOUG16893-D03|Kate Perez|BIN Taxonomy Match|BOLD:ACP2182  
 Orthocladus|BIOUG16854-F03|Kate Perez|BIN Taxonomy Match|BOLD:ACP2182  
 Orthocladus|BIOUG16857-G01|Kate Perez|BIN Taxonomy Match|BOLD:ACP2182  
 Orthocladus|BIOUG16892-A10|Kate Perez|BIN Taxonomy Match|BOLD:ACP2182  
 Orthocladus|BIOUG16892-C10|Kate Perez|BIN Taxonomy Match|BOLD:ACP2182  
 Orthocladus|BIOUG16782-G12|Kate Perez|BIN Taxonomy Match|BOLD:ACP2182  
 Orthocladus|BIOUG16784-C11|Kate Perez|BIN Taxonomy Match|BOLD:ACP2182  
 Orthocladus|BIOUG16740-B11|Kate Perez|BIN Taxonomy Match|BOLD:ACP2182  
 Orthocladus|BIOUG16994-C11|Kate Perez|BIN Taxonomy Match|BOLD:ACP2182  
 Orthocladus|BIOUG16859-C02|Kate Perez|BIN Taxonomy Match|BOLD:ACP2182  
 Orthocladus|CCDB21605-B09|Sofia Wiedenbrug|BOLD:ACP2182  
 Orthocladus|BIOUG16894-A12|Kate Perez|BIN Taxonomy Match|BOLD:ACP2182  
 Orthocladus|BIOUG16893-F10|Kate Perez|BIN Taxonomy Match|BOLD:ACP2182  
 Orthocladus|BIOUG16853-C04|Kate Perez|BIN Taxonomy Match|BOLD:ACP2182  
 Orthocladus|BIOUG16859-F10|Kate Perez|BIN Taxonomy Match|BOLD:ACP2182  
 Orthocladus|BIOUG16854-B12|Kate Perez|BIN Taxonomy Match|BOLD:ACP2182  
 Orthocladus|BIOUG16785-G11|Kate Perez|BIN Taxonomy Match|BOLD:ACP2182  
 Orthocladus|BIOUG16893-D08|Kate Perez|BIN Taxonomy Match|BOLD:ACP2182  
 Orthocladus|BIOUG16996-E03|Kate Perez|BIN Taxonomy Match|BOLD:ACP2182  
 Orthocladus|BIOUG16739-D07|Kate Perez|BIN Taxonomy Match|BOLD:ACP2182  
 Orthocladus lapponicus|Finmark250|Torbjorn Ekrem|BOLD:AAB2644  
 Orthocladus lapponicus|Finmark248|Elisabeth Stur|BOLD:AAB2644  
 Orthocladus cf. dentifer|CH-OSF110|Torbjorn Ekrem|BOLD:AAV2837  
 Orthocladus|BIOUG16479-D12|Kate Perez|BIN Taxonomy Match|BOLD:AAV5071  
 Orthocladus|BIOUG15592-G10|Kate Perez|BIN Taxonomy Match|BOLD:AAV5071  
 Orthocladus|BIOUG16711-H03|Kate Perez|BIN Taxonomy Match|BOLD:AAV5071  
 Orthocladus|BIOUG16426-H09|Kate Perez|BIN Taxonomy Match|BOLD:AAV5071  
 Orthocladus|BIOUG16258-F09|Kate Perez|BIN Taxonomy Match|BOLD:AAV5071  
 Orthocladus|BIOUG16597-A08|Kate Perez|BIN Taxonomy Match|BOLD:AAV5071  
 Orthocladus|BIOUG16259-H10|Kate Perez|BIN Taxonomy Match|BOLD:AAV5071  
 Orthocladus|BIOUG16632-A03|Kate Perez|BIN Taxonomy Match|BOLD:AAV5071  
 Orthocladus|BIOUG15595-A06|Kate Perez|BIN Taxonomy Match|BOLD:AAV5071  
 Orthocladus|BIOUG16711-G06|Kate Perez|BIN Taxonomy Match|BOLD:AAV5071  
 Orthocladus|BIOUG16632-B12|Kate Perez|BIN Taxonomy Match|BOLD:AAV5071  
 Orthocladus sp. 11TE|TRD-CH112|Elisabeth Stur|BOLD:AAV5071  
 Orthocladus sp. 11TE|RIN\_CH27|Mona Renate Saurasnet|BOLD Identification engine|BOLD:AAV5071  
 Orthocladus sp. 11TE|Finmark893|Elisabeth Stur|BOLD:AAV5071  
 Orthocladus|BIOUG15594-G06|Kate Perez|BIN Taxonomy Match|BOLD:AAV5071  
 Orthocladus|BIOUG15538-B09|Kate Perez|BIN Taxonomy Match|BOLD:AAV5071  
 Orthocladus|BIOUG15539-F08|Kate Perez|BIN Taxonomy Match|BOLD:AAV5071  
 Orthocladus|BIOUG16712-G01|Kate Perez|BIN Taxonomy Match|BOLD:AAV5071  
 Orthocladus|BIOUG15766-A09|Kate Perez|BIN Taxonomy Match|BOLD:AAV5071  
 Orthocladus|BIOUG15766-D06|Kate Perez|BIN Taxonomy Match|BOLD:AAV5071  
 Orthocladus|BIOUG15954-D02|Kate Perez|BIN Taxonomy Match|BOLD:AAV5071  
 Orthocladus|BIOUG15965-C05|Kate Perez|BIN Taxonomy Match|BOLD:AAV5071  
 Orthocladus|BIOUG15648-E11|Kate Perez|BIN Taxonomy Match|BOLD:AAV5071  
 Orthocladus|BIOUG16257-A03|Kate Perez|BIN Taxonomy Match|BOLD:AAV5071  
 Orthocladus|BIOUG16258-H08|Kate Perez|BIN Taxonomy Match|BOLD:AAV5071  
 Orthocladus|BIOUG16259-A06|Kate Perez|BIN Taxonomy Match|BOLD:AAV5071  
 Orthocladus|BIOUG16330-G12|Kate Perez|BIN Taxonomy Match|BOLD:AAV5071  
 Orthocladus|BIOUG15650-E03|Kate Perez|BIN Taxonomy Match|BOLD:AAV5071  
 Orthocladus|BIOUG16436-B07|Kate Perez|BIN Taxonomy Match|BOLD:AAV5071  
 Orthocladus|BIOUG15594-C06|Kate Perez|BIN Taxonomy Match|BOLD:AAV5071  
 Orthocladus|BIOUG15592-E08|Kate Perez|BIN Taxonomy Match|BOLD:AAV5071  
 Orthocladus|BIOUG16480-D03|Kate Perez|BIN Taxonomy Match|BOLD:AAV5071  
 Orthocladus|BIOUG15541-A02|Kate Perez|BIN Taxonomy Match|BOLD:AAV5071  
 Orthocladus|BIOUG15963-E03|Kate Perez|BIN Taxonomy Match|BOLD:AAV5071  
 Orthocladus|BIOUG15764-E02|Kate Perez|BIN Taxonomy Match|BOLD:AAV5071  
 Orthocladus|BIOUG15798-E04|Kate Perez|BIN Taxonomy Match|BOLD:AAV5071  
 Orthocladus|BIOUG15794-G12|Kate Perez|BIN Taxonomy Match|BOLD:AAV5071  
 Orthocladus|BIOUG15966-B04|Kate Perez|BIN Taxonomy Match|BOLD:AAV5071  
 Orthocladus|BIOUG15808-F09|Kate Perez|BIN Taxonomy Match|BOLD:AAV5071  
 Orthocladus|BIOUG16430-B03|Kate Perez|BIN Taxonomy Match|BOLD:AAV5071  
 Orthocladus|BIOUG16479-D06|Kate Perez|BIN Taxonomy Match|BOLD:AAV5071  
 Orthocladus|BIOUG16711-A09|Kate Perez|BIN Taxonomy Match|BOLD:AAV5071  
 Orthocladus|BIOUG16718-H11|Kate Perez|BIN Taxonomy Match|BOLD:AAV5071  
 Orthocladus|BIOUG15949-H03|Kate Perez|BIN Taxonomy Match|BOLD:AAV5071  
 Orthocladus|BIOUG15718-D04|Kate Perez|BIN Taxonomy Match|BOLD:AAV5071  
 Orthocladus|BIOUG16597-A07|Kate Perez|BIN Taxonomy Match|BOLD:AAV5071



Orthocladius|BIOUG15544-C12|Kate Perez|BIN Taxonomy Match|BOLD:AAV5071  
Orthocladius|BIOUG16476-F04|Kate Perez|BIN Taxonomy Match|BOLD:AAV5071  
Orthocladius|BIOUG16433-H11|Kate Perez|BIN Taxonomy Match|BOLD:AAV5071  
Orthocladius|BIOUG15950-D01|Kate Perez|BIN Taxonomy Match|BOLD:AAV5071  
Orthocladius|BIOUG16478-A03|Kate Perez|BIN Taxonomy Match|BOLD:AAV5071  
Orthocladius|BIOUG15953-H05|Kate Perez|BIN Taxonomy Match|BOLD:AAV5071  
Orthocladius|BIOUG16632-E10|Kate Perez|BIN Taxonomy Match|BOLD:AAV5071  
Orthocladius|BIOUG16630-G06|Kate Perez|BIN Taxonomy Match|BOLD:AAV5071  
Orthocladius|BIOUG15764-G12|Kate Perez|BIN Taxonomy Match|BOLD:AAV5071  
Orthocladius|BIOUG15905-A09|Kate Perez|BIN Taxonomy Match|BOLD:AAV5071  
Orthocladius|BIOUG15539-E04|Kate Perez|BIN Taxonomy Match|BOLD:AAV5071  
Orthocladius|BIOUG15598-D04|Kate Perez|BIN Taxonomy Match|BOLD:AAV5071  
Orthocladius|BIOUG16712-F05|Kate Perez|BIN Taxonomy Match|BOLD:AAV5071  
Orthocladius sp. 11TE|PK-195-17|Torbjorn Ekrem|BIN Taxonomy Match|BOLD:AAV5071  
Orthocladius|BIOUG15761-E06|Kate Perez|BIN Taxonomy Match|BOLD:AAV5071  
Orthocladius|BIOUG15571-E12|Kate Perez|BIN Taxonomy Match|BOLD:AAV5071  
Orthocladius|BIOUG16433-H02|Kate Perez|BIN Taxonomy Match|BOLD:AAV5071  
Orthocladius|BIOUG16259-E04|Kate Perez|BIN Taxonomy Match|BOLD:AAV5071  
Orthocladius|BIOUG15766-B06|Kate Perez|BIN Taxonomy Match|BOLD:AAV5071  
Orthocladius|BIOUG15950-B02|Kate Perez|BIN Taxonomy Match|BOLD:AAV5071  
Orthocladius|BIOUG15562-A07|Kate Perez|BIN Taxonomy Match|BOLD:AAV5071  
Orthocladius|BIOUG16632-A02|Kate Perez|BIN Taxonomy Match|BOLD:AAV5071  
Orthocladius|BIOUG16632-F08|Kate Perez|BIN Taxonomy Match|BOLD:AAV5071  
Orthocladius|BIOUG16259-F09|Kate Perez|BIN Taxonomy Match|BOLD:AAV5071  
Orthocladius|BIOUG16261-G09|Kate Perez|BIN Taxonomy Match|BOLD:AAV5071  
Orthocladius|BIOUG15675-B12|Kate Perez|BIN Taxonomy Match|BOLD:AAV5071  
Orthocladius|BIOUG16431-G05|Kate Perez|BIN Taxonomy Match|BOLD:AAV5071  
Orthocladius|BIOUG15766-H08|Kate Perez|BIN Taxonomy Match|BOLD:AAV5071  
Orthocladius|BIOUG15596-D04|Kate Perez|BIN Taxonomy Match|BOLD:AAV5071  
Orthocladius|BIOUG16632-D02|Kate Perez|BIN Taxonomy Match|BOLD:AAV5071  
Orthocladius|BIOUG15545-E09|Kate Perez|BIN Taxonomy Match|BOLD:AAV5071  
Orthocladius|BIOUG15952-H02|Kate Perez|BIN Taxonomy Match|BOLD:AAV5071  
Orthocladius|BIOUG16436-C12|Kate Perez|BIN Taxonomy Match|BOLD:AAV5071  
Orthocladius|BIOUG16430-A10|Kate Perez|BIN Taxonomy Match|BOLD:AAV5071  
Orthocladius|BIOUG15950-E03|Kate Perez|BIN Taxonomy Match|BOLD:AAV5071  
Orthocladius|BIOUG15764-B05|Kate Perez|BIN Taxonomy Match|BOLD:AAV5071  
Orthocladius|BIOUG15764-B02|Kate Perez|BIN Taxonomy Match|BOLD:AAV5071  
Orthocladius|BIOUG15763-E12|Kate Perez|BIN Taxonomy Match|BOLD:AAV5071  
Orthocladius|BIOUG15762-H07|Kate Perez|BIN Taxonomy Match|BOLD:AAV5071  
Orthocladius sp. 11TE|Finmark313|Torbjorn Ekrem|BOLD:AAV5071  
Orthocladius|BC-ZSM-DIP-22491-H08|Dieter Doczkal|BOLD:ACX1285  
Chironominae|BIOUG16855-C03|Kate Perez|BOLD ID Engine Manual|BOLD:ACR1743  
Cricotopus sylvestris|ZSM-DIP-33129-E06|Caroline Chimento|BIN Taxonomy Match (Jan 2022)|BOLD.  
Orthocladius|BIOUG16854-G09|Valerie Levesque-Beaudin|Morphological|BOLD:ACR1936  
Orthocladinae|BIOUG16778-B09|Kate Perez|BIN Taxonomy Match|BOLD:AAW0369  
Orthocladinae|BIOUG16740-D12|Kate Perez|BIN Taxonomy Match|BOLD:AAW0369  
Orthocladinae|BIOUG16778-C06|Kate Perez|BIN Taxonomy Match|BOLD:AAW0369  
Orthocladinae|BIOUG16779-C09|Kate Perez|BIN Taxonomy Match|BOLD:AAW0369  
Orthocladinae|BIOUG16994-F09|Kate Perez|BIN Taxonomy Match|BOLD:AAW0369  
Orthocladinae|BIOUG16893-F06|Kate Perez|BIN Taxonomy Match|BOLD:AAW0369  
Orthocladinae|BIOUG16854-F02|Kate Perez|BIN Taxonomy Match|BOLD:AAW0369  
Orthocladinae|BIOUG16776-B07|Kate Perez|BIN Taxonomy Match|BOLD:AAW0369  
Orthocladinae|BIOUG16740-F07|Kate Perez|BIN Taxonomy Match|BOLD:AAW0369  
Orthocladinae|BIOUG16853-C09|Kate Perez|BIN Taxonomy Match|BOLD:AAW0369  
Orthocladinae|BIOUG16784-F03|Kate Perez|BIN Taxonomy Match|BOLD:AAW0369  
Orthocladinae|BIOUG16856-H03|Kate Perez|BIN Taxonomy Match|BOLD:AAW0369  
Orthocladinae|BIOUG16785-H07|Kate Perez|BIN Taxonomy Match|BOLD:AAW0369  
Orthocladinae|BIOUG16853-H01|Kate Perez|BIN Taxonomy Match|BOLD:AAW0369  
Orthocladinae|BIOUG16859-C10|Kate Perez|BIN Taxonomy Match|BOLD:AAW0369  
Orthocladinae|BIOUG16776-C05|Kate Perez|BIN Taxonomy Match|BOLD:AAW0369  
Orthocladinae|BIOUG16859-D02|Kate Perez|BIN Taxonomy Match|BOLD:AAW0369  
Orthocladinae|BIOUG16859-G11|Kate Perez|BIN Taxonomy Match|BOLD:AAW0369  
Orthocladinae|BIOUG16778-H09|Kate Perez|BIN Taxonomy Match|BOLD:AAW0369  
Orthocladinae|BIOUG16721-A02|Kate Perez|BIN Taxonomy Match|BOLD:AAW0369  
Orthocladinae|BIOUG16853-A08|Kate Perez|BIN Taxonomy Match|BOLD:AAW0369  
Orthocladinae|BIOUG16775-H04|Kate Perez|BIN Taxonomy Match|BOLD:AAW0369  
Orthocladinae|BIOUG16783-G11|Kate Perez|BIN Taxonomy Match|BOLD:AAW0369  
Orthocladinae|BIOUG16782-F03|Kate Perez|BIN Taxonomy Match|BOLD:AAW0369  
Orthocladinae|BIOUG16854-H01|Kate Perez|BIN Taxonomy Match|BOLD:AAW0369  
Orthocladinae|BIOUG16859-A11|Kate Perez|BIN Taxonomy Match|BOLD:AAW0369  
Orthocladinae|BIOUG16859-G05|Kate Perez|BIN Taxonomy Match|BOLD:AAW0369  
Orthocladinae|BIOUG16853-A02|Kate Perez|BIN Taxonomy Match|BOLD:AAW0369  
Orthocladinae|BIOUG16785-D01|Kate Perez|BIN Taxonomy Match|BOLD:AAW0369  
Orthocladinae|BIOUG16779-C08|Kate Perez|BIN Taxonomy Match|BOLD:AAW0369  
Orthocladinae|BIOUG16859-H08|Kate Perez|BIN Taxonomy Match|BOLD:AAW0369  
Orthocladinae|BIOUG16779-F03|Kate Perez|BIN Taxonomy Match|BOLD:AAW0369  
Orthocladinae|BIOUG16739-C03|Kate Perez|BIN Taxonomy Match|BOLD:AAW0369  
Orthocladinae|BIOUG16739-A08|Kate Perez|BIN Taxonomy Match|BOLD:AAW0369  
Orthocladinae|BIOUG16720-F11|Kate Perez|BIN Taxonomy Match|BOLD:AAW0369  
Orthocladinae|BIOUG16857-G05|Kate Perez|BIN Taxonomy Match|BOLD:AAW0369  
Orthocladinae|BIOUG16856-C04|Kate Perez|BIN Taxonomy Match|BOLD:AAW0369  
Orthocladinae|BIOUG16776-A02|Kate Perez|BIN Taxonomy Match|BOLD:AAW0369  
Orthocladinae|BIOUG16785-D04|Kate Perez|BIN Taxonomy Match|BOLD:AAW0369  
Orthocladinae|BIOUG16784-D09|Kate Perez|BIN Taxonomy Match|BOLD:AAW0369  
Orthocladius thienemanni|CH-OSF63|Torbjorn Ekrem|BOLD:AAW0369  
Orthocladius sp. 16TE|ATNA279|Torbjorn Ekrem|BOLD:AAB1172  
Orthocladius rivicola|EBAI-Ch073|Elisabeth Stur|morphology|BOLD:ADL9709  
Orthocladius rivicola|EBAI-Ch072|Elisabeth Stur|morphology|BOLD:ADL9709  
Orthocladius rivicola|EBAI-Ch202|Elisabeth Stur|morphology|BOLD:ADL9709  
Orthocladius rivicola|EBAI-Ch075|Elisabeth Stur|morphology|BOLD:ADL9709  
Orthocladius rivicola|EBAI-Ch135|Elisabeth Stur|BOLD Identification Engine|BOLD:ADL9709  
Orthocladius rivicola|EBAI-Ch068|Elisabeth Stur|morphology|BOLD:ADL9709  
Orthocladius rivicola|EBAI-Ch134|Elisabeth Stur|BOLD Identification Engine|BOLD:ADL9709  
Orthocladius rivicola|EBAI-Ch074|Elisabeth Stur|morphology|BOLD:ADL9709  
Orthocladius rivicola|EBAI-Ch070|Elisabeth Stur|morphology|BOLD:ADL9709  
Orthocladius rivicola|EBAI-Ch266|Elisabeth Stur|morphology|BOLD:ADL9709  
Orthocladius rivicola|EBAI-Ch071|Elisabeth Stur|morphology|BOLD:ADL9709  
Orthocladius rivicola|EBAI-Ch069|Elisabeth Stur|morphology|BOLD:ADL9709  
Orthocladius rivicola|EBAI-Ch265|Elisabeth Stur|morphology|BOLD:ADL9709  
Orthocladius rivicola|EBAI-Ch201|Elisabeth Stur|morphology|BOLD:ADL9709  
Orthocladius telochaetus|Finmark806|G. A. Halvorsen|BOLD:ADL9709  
Orthocladius telochaetus|Finmark804|Elisabeth Stur|BOLD:ADL9709



Orthocladus rivicola|EBAl-Ch201|Elisabeth Stur|morphology|BOLD:ADL9709  
 Orthocladus telochaetus|Finmark806|G. A. Halvorsen|BOLD:ADL9709  
 Orthocladus telochaetus|Finmark804|Elisabeth Stur|BOLD:ADL9709  
 Orthocladus rivicola|ATNA219|Elisabeth Stur|BOLD:AAB1171  
 Orthocladus rivicola|ATNA218|Elisabeth Stur|BOLD:AAB1171  
 Orthocladus rivicola|Finmark790|Elisabeth Stur|BOLD:AAB1171  
 Orthocladus rivicola|ATNA136|Elisabeth Stur|BOLD:AAB1171  
 Orthocladus sp. 15TE|BIOUG15544-G07|Kate Perez|BIN Taxonomy Match|BOLD:AAM5390  
 Orthocladus|BIOUG15458-E09|Kate Perez|Tree based identification  
 Orthocladus sp. 15TE|BIOUG15545-D10|Elisabeth Stur|Tree based identification  
 Orthocladus sp. 15TE|BIOUG17022-C06|Kate Perez|BIN Taxonomy Match|BOLD:AAM5390  
 Orthocladus sp. 15TE|BIOUG15561-D07|Kate Perez|BIN Taxonomy Match|BOLD:AAM5390  
 Orthocladus sp. 15TE|BIOUG15543-A02|Kate Perez|BIN Taxonomy Match|BOLD:AAM5390  
 Orthocladus ashei|Finmark62|Torbjorn Ekrem|BOLD:AAM5390  
 Orthocladus|CCDB24038-D05|Sofia Wiedenbrug|BIN Taxonomy Match|BOLD:AAM5390  
 Orthocladus|CCDB24037-B01|Sofia Wiedenbrug|BIN Taxonomy Match|BOLD:AAM5390  
 Orthocladus ashei|ZSM-DIP-33131-H03|Caroline Chimeno|BIN Taxonomy Match (Jan 2022)|BOLD: ...  
 Orthocladus sp. 15TE|24405-E12|Kate Perez|BIN Taxonomy Match|BOLD:AAM5390  
 Orthocladus|BC-ZSM-DIP-22491-D08|Dieter Doczkal|BOLD:AAM5390  
 Chironomidae|CCDB24038-G09|BIN Taxonomy Match|BOLD:AAM5390  
 Orthocladus|CCDB24038-D07|Sofia Wiedenbrug|BIN Taxonomy Match|BOLD:AAM5390  
 Orthocladus|CCDB24229-C08|Sofia Wiedenbrug|BIN Taxonomy Match|BOLD:AAM5390  
 Orthocladus ashei|Finmark878|G. A. Halvorsen|BOLD:AAM5390  
 Orthocladus|BC-ZSM-DIP-22491-G10|Dieter Doczkal|BOLD:AAM5390  
 Orthocladus sp. 15TE|24539-B11|Kate Perez|BIN Taxonomy Match|BOLD:AAM5390  
 Orthocladus|CCDB24038-D06|Sofia Wiedenbrug|BIN Taxonomy Match|BOLD:AAM5390  
 Orthocladus ashei|Finmark28|Torbjorn Ekrem|BOLD:AAM5390  
 Orthocladus ashei|TRD-CH86|Elisabeth Stur|BOLD:AAM5390  
 Orthocladus ashei|Finmark884|G. A. Halvorsen|BOLD:AAM5390  
 Orthocladus sp. 15TE|BIOUG15565-B08|Kate Perez|BIN Taxonomy Match|BOLD:AAM5390  
 Orthocladus sp. 15TE|BIOUG15460-F08|Kate Perez|BIN Taxonomy Match|BOLD:AAM5390  
 Orthocladus consobrinus|ZMUO.026220|Lauri Paasivirta|BOLD:ADF1072  
 Orthocladus consobrinus|ZMUO.026219|Lauri Paasivirta|BOLD:ADF1072  
 Orthocladus consobrinus|NHRS-BYWS000000946|Yngve Brodin|morphology|BOLD:AAM5387  
 Orthocladus consobrinus|NHRS-BYWS000000945|Yngve Brodin|morphology|BOLD:AAM5387  
 Orthocladus consobrinus|ZMUO.025941|Lauri Paasivirta|BOLD:AAM5387  
 Orthocladus sp. 4TE|Finmark197|Torbjorn Ekrem|BOLD:AAM5387  
 Orthocladus sp. 4TE|Finmark129|Torbjorn Ekrem|BOLD:AAM5387  
 Orthocladus saxosus|ATNA167|Elisabeth Stur|BOLD:AAB4825  
 Orthocladus saxosus|ATNA373|Elisabeth Stur|BOLD:AAB4825  
 Orthocladus saxosus|ATNA4|Elisabeth Stur|BOLD:AAB4825  
 Orthocladus saxosus|ATNA151|Elisabeth Stur|BOLD:AAB4825  
 Orthocladus saxosus|ATNA476|Elisabeth Stur|BOLD:AAB4825  
 Orthocladus saxosus|ATNA181|Elisabeth Stur|BOLD:AAB4825  
 Orthocladus saxosus|EBAl-Ch092|Elisabeth Stur|morphology|BOLD:AAB4825  
 Orthocladus saxosus|EBAl-Ch092|Elisabeth Stur|morphology|BOLD:AAB4825  
 Orthocladus saxosus|Finmark71|Elisabeth Stur|BOLD:AAB4825  
 Orthocladus saxosus|EBAl-Ch065|Elisabeth Stur|morphology|BOLD:AAB4825  
 Orthocladus saxosus|EBAl-Ch203|Elisabeth Stur|morphology|BOLD:AAB4825  
 Orthocladus saxosus|ATNA158|Elisabeth Stur|BOLD:AAB4825  
 Orthocladus saxosus|ATNA3|Elisabeth Stur|BOLD:AAB4825  
 Orthocladus saxosus|ATNA126|Elisabeth Stur|BOLD:AAB4825  
 Orthocladus saxosus|ATNA184|Elisabeth Stur|BOLD:AAB4825  
 Orthocladus saxosus|EBAl-Ch199|Elisabeth Stur|morphology|BOLD:AAB4825  
 Orthocladus saxosus|ATNA127|Elisabeth Stur|BOLD:AAB4825  
 Orthocladus saxosus|Finmark491|Elisabeth Stur|BOLD:AAB4825  
 Orthocladus saxosus|ATNA2|Elisabeth Stur|BOLD:AAB4825  
 Orthocladus saxosus|ATNA141|Elisabeth Stur|BOLD:AAB4825  
 Orthocladus saxosus|ATNA180|Elisabeth Stur|BOLD:AAB4825  
 Orthocladus saxosus|ATNA179|Elisabeth Stur|BOLD:AAB4825  
 Orthocladus saxosus|ATNA138|Elisabeth Stur|BOLD:AAB4825  
 Orthocladus saxosus|ATNA187|Elisabeth Stur|BOLD:AAB4825  
 Orthocladus saxosus|ATNA147|Elisabeth Stur|BOLD:AAB4825  
 Orthocladus saxosus|ATNA139|Elisabeth Stur|BOLD:AAB4825  
 Orthocladus saxosus|Finmark753|Elisabeth Stur|BOLD:AAB4825  
 Orthocladus saxosus|Finmark752|Elisabeth Stur|BOLD:AAB4825  
 Orthocladus saxosus|EBAl-Ch204|Elisabeth Stur|morphology|BOLD:AAB4825  
 Orthocladus saxosus|EBAl-Ch090|Elisabeth Stur|morphology|BOLD:AAB4825  
 Orthocladus saxosus|EBAl-Ch089|Elisabeth Stur|morphology|BOLD:AAB4825  
 Orthocladus saxosus|EBAl-Ch093|Elisabeth Stur|morphology|BOLD:AAB4825  
 Orthocladus saxosus|EBAl-Ch094|Elisabeth Stur|morphology|BOLD:AAB4825  
 Orthocladus saxosus|EBAl-Ch088|Elisabeth Stur|morphology|BOLD:AAB4825  
 Orthocladus saxosus|EBAl-Ch200|Elisabeth Stur|morphology|BOLD:AAB4825  
 Orthocladus saxosus|ATNA226|Elisabeth Stur|BOLD:AAB4825  
 Orthocladus saxosus|ATNA217|Elisabeth Stur|BOLD:AAB4825  
 Orthocladus saxosus|ATNA210|Elisabeth Stur|BOLD:AAB4825  
 Orthocladus saxosus|ATNA209|Elisabeth Stur|BOLD:AAB4825  
 Orthocladus saxosus|Finmark487|Elisabeth Stur|BOLD:AAB4825  
 Orthocladus|BC-ZSM-DIP-22551-E12|Dieter Doczkal|BOLD:AEJ6987  
 Orthocladus|BC-ZSM-DIP-22551-D08|Dieter Doczkal|BOLD:AEJ6987  
 Orthocladus|BC-ZSM-DIP-22491-F04|Dieter Doczkal|BOLD:AEJ6987  
 Orthocladus|ZSM34342-D11|Sofia Wiedenbrug|Morphology|BOLD:AEJ6987  
 Orthocladus|BC-ZSM-DIP-22551-C02|Dieter Doczkal|BOLD:AEJ6987  
 Orthocladus|CCDB24039-E12|Sofia Wiedenbrug|BIN Taxonomy Match|BOLD:AEJ6987  
 Orthocladus|BC-ZSM-DIP-22491-E10|Dieter Doczkal|BOLD:AEJ6987  
 Orthocladus|CCDB24038-D04|Sofia Wiedenbrug|BIN Taxonomy Match|BOLD:AEJ6987  
 Orthocladus|BC-ZSM-DIP-22551-D04|Dieter Doczkal|BOLD:AEJ6987  
 Orthocladus|CCDB24228-A06|Sofia Wiedenbrug|BIN Taxonomy Match|BOLD:AEJ6987  
 Orthocladus|BC-ZSM-DIP-22491-G04|Dieter Doczkal|BOLD:AEJ6987  
 Orthocladus|BC-ZSM-DIP-22551-C06|Dieter Doczkal|BOLD:AEJ6987  
 Orthocladus|CCDB24039-E11|Sofia Wiedenbrug|BIN Taxonomy Match|BOLD:AEJ6987  
 Orthocladus|CCDB24039-G07|Sofia Wiedenbrug|BIN Taxonomy Match|BOLD:AEJ6987  
 Orthocladus|ZSM34343-G10|Sofia Wiedenbrug|Morphology|BOLD:AEJ6987  
 Orthocladus|BC-ZSM-DIP-22491-F11|Dieter Doczkal|BOLD:AEJ6987  
 Orthocladus|CCDB24039-B08|Sofia Wiedenbrug|BIN Taxonomy Match|BOLD:AEJ6987  
 Orthocladus|CCDB24038-D12|Sofia Wiedenbrug|BIN Taxonomy Match|BOLD:AEJ6987  
 Orthocladus|ZSM34342-B08|Sofia Wiedenbrug|Morphology|BOLD:ACQ3313  
 Orthocladus|BC-ZSM-DIP-22551-F11|Dieter Doczkal|BOLD:AEJ6987  
 Orthocladus|CCDB24037-D06|Sofia Wiedenbrug|BIN Taxonomy Match|BOLD:AEJ6987  
 Orthocladus|CCDB24037-A01|Sofia Wiedenbrug|BIN Taxonomy Match|BOLD:AEJ6987  
 Orthocladinae|CCDB24228-G11|BIN Taxonomy Match|BOLD:ACQ3313  
 Orthocladus|BC-ZSM-DIP-22551-E07|Dieter Doczkal|BOLD:AEJ6987  
 Orthocladus|BC-ZSM-DIP-22551-D11|Dieter Doczkal|BOLD:AEJ6987

Orthocladinae|CCDB24228-G11|BIN Taxonomy Match|BOLD:ACQ3313  
 Orthocladus|BC-ZSM-DIP-22551-E07|Dieter Doczkal|BOLD:AEJ6987  
 Orthocladus|BC-ZSM-DIP-22551-D11|Dieter Doczkal|BOLD:AEJ6987  
 Orthocladus|BC-ZSM-DIP-22491-E12|Dieter Doczkal|BOLD:AEJ6988  
 Orthocladus|BC-ZSM-DIP-22491-H03|Dieter Doczkal|BOLD:AEJ6988  
 Orthocladus|CCDB24037-F02|Sofia Wiedenbrug|BIN Taxonomy Match|BOLD:AEJ6988  
 Orthocladus|BC-ZSM-DIP-22488-C07|Dieter Doczkal|BOLD:ACQ3313  
 Orthocladus|BC-ZSM-DIP-22488-C12|Dieter Doczkal|BOLD:ACQ3313  
 Orthocladus|BC-ZSM-DIP-22488-F01|Dieter Doczkal|BOLD:ACQ3313  
 Orthocladus|ZSM34342-D10|Sofia Wiedenbrug|Morphology|BOLD:ACQ3313  
 Orthocladus|BC-ZSM-DIP-22488-G06|Dieter Doczkal|BOLD:ACQ3313  
 Orthocladus|BC-ZSM-DIP-22488-E04|Dieter Doczkal|BOLD:ACQ3313  
 Orthocladus|BC-ZSM-DIP-22488-E03|Dieter Doczkal|BOLD:ACQ3313  
 Orthocladus|ZSM34342-D08|Sofia Wiedenbrug|Morphology|BOLD:ACQ3313  
 Orthocladus|BC-ZSM-DIP-22488-E01|Dieter Doczkal|BOLD:ACQ3313  
 Orthocladus|BC-ZSM-DIP-22488-C08|Dieter Doczkal|BOLD:ACQ3313  
 Orthocladus|CCDB24038-H01|Sofia Wiedenbrug|BIN Taxonomy Match|BOLD:ACQ3313  
 Orthocladus|CCDB24038-G03|Sofia Wiedenbrug|BIN Taxonomy Match|BOLD:ACQ3313  
 Orthocladus|CCDB24038-G02|Sofia Wiedenbrug|BIN Taxonomy Match|BOLD:ACQ3313  
 Orthocladus|BC-ZSM-DIP-22488-G02|Dieter Doczkal|BOLD:ACQ3313  
 Orthocladus|CCDB24039-A07|Sofia Wiedenbrug|BIN Taxonomy Match|BOLD:ACQ3313  
 Orthocladus|ZSM34342-D12|Sofia Wiedenbrug|Morphology|BOLD:ACQ3313  
 Orthocladus|CCDB24038-G12|Sofia Wiedenbrug|BIN Taxonomy Match|BOLD:ACQ3313  
 Orthocladus|CCDB21606-H11|Sofia Wiedenbrug|BOLD:ACQ3313  
 Orthocladus|CCDB24037-D03|Sofia Wiedenbrug|BIN Taxonomy Match|BOLD:ACQ3313  
 Orthocladus|GBOL03746|Sofia Wiedenbrug|BOLD:ACQ3313  
 Orthocladus|ATNA129|Elisabeth Stur|BOLD:AAI3486  
 Orthocladus|BIOUG15542-F09|Elisabeth Stur|BIN Taxonomy Match|BOLD:AAI3486  
 Orthocladus|EBAl-Ch211|Elisabeth Stur|morphology|BOLD:AAI3486  
 Orthocladus|BIOUG15538-D11|Elisabeth Stur|BIN Taxonomy Match|BOLD:AAI3486  
 Orthocladus frigidus|ZMUO.025956|Lauri Paasivirta|BOLD:AAE1613  
 Orthocladus frigidus|ZMUO.025955|Lauri Paasivirta|BOLD:AAE1613  
 Orthocladus frigidus|EBAl-Ch119|Elisabeth Stur|BOLD Identification Engine|BOLD:AAE1613  
 Orthocladus frigidus|BIOUG15454-H01|Kate Perez|BIN Taxonomy Match|BOLD:AAE1613  
 Orthocladus frigidus|EBAl-Ch118|Elisabeth Stur|BOLD Identification Engine|BOLD:AAE1613  
 Orthocladus frigidus|TRD-CH85|Elisabeth Stur|BOLD:AAE1613  
 Orthocladus frigidus|BIOUG17064-A09|Kate Perez|BIN Taxonomy Match|BOLD:AAE1613  
 Orthocladus frigidus|BIOUG15463-E03|Kate Perez|BIN Taxonomy Match|BOLD:AAE1613  
 Orthocladus frigidus|BIOUG15544-E06|Kate Perez|BIN Taxonomy Match|BOLD:AAE1613  
 Orthocladus frigidus|BIOUG15565-B12|Kate Perez|BIN Taxonomy Match|BOLD:AAE1613  
 Orthocladus frigidus|BIOUG17025-C12|Kate Perez|BIN Taxonomy Match|BOLD:AAE1613  
 Orthocladus frigidus|BIOUG15564-B04|Kate Perez|BIN Taxonomy Match|BOLD:AAE1613  
 Orthocladus frigidus|BIOUG17064-H11|Kate Perez|BIN Taxonomy Match|BOLD:AAE1613  
 Orthocladus frigidus|BIOUG15539-A04|Kate Perez|BIN Taxonomy Match|BOLD:AAE1613  
 Orthocladus frigidus|BIOUG17025-E11|Kate Perez|BIN Taxonomy Match|BOLD:AAE1613  
 Orthocladus frigidus|BIOUG17064-B12|Kate Perez|BIN Taxonomy Match|BOLD:AAE1613  
 Orthocladus frigidus|BIOUG17065-A06|Kate Perez|BIN Taxonomy Match|BOLD:AAE1613  
 Orthocladus frigidus|BIOUG15543-H07|Kate Perez|BIN Taxonomy Match|BOLD:AAE1613  
 Orthocladus frigidus|BIOUG15542-D02|Kate Perez|BIN Taxonomy Match|BOLD:AAE1613  
 Orthocladus frigidus|BIOUG15542-A12|Kate Perez|BIN Taxonomy Match|BOLD:AAE1613  
 Orthocladus frigidus|BIOUG15465-D11|Kate Perez|BIN Taxonomy Match|BOLD:AAE1613  
 Orthocladus frigidus|NO47|Elisabeth Stur|BOLD:AAE1613  
 Orthocladus frigidus|ATNA255|Elisabeth Stur|BOLD:AAE1613  
 Orthocladus frigidus|ATNA460|Elisabeth Stur|BOLD:AAE1613  
 Orthocladus frigidus|BIOUG17025-C05|Kate Perez|BIN Taxonomy Match|BOLD:AAE1613  
 Orthocladus frigidus|ATNA224|Elisabeth Stur|BOLD:AAE1613  
 Orthocladus frigidus|TRD-CH114|Elisabeth Stur|BOLD:AAE1613  
 Orthocladus frigidus|ATNA128|Elisabeth Stur|BOLD:AAE1613  
 Orthocladus frigidus|ATNA137|Elisabeth Stur|BOLD:AAE1613  
 Orthocladus frigidus|CH-OSF155|Elisabeth Stur|BOLD:AAE1613  
 Orthocladus frigidus|EBAl-Ch194|Elisabeth Stur|morphology|BOLD:AAE1613  
 Orthocladus frigidus|EBAl-Ch117|Elisabeth Stur|BOLD Identification Engine|BOLD:AAE1613  
 Orthocladus frigidus|BIOUG15465-B12|Kate Perez|BIN Taxonomy Match|BOLD:AAE1613  
 Orthocladus frigidus|BIOUG15464-D12|Kate Perez|BIN Taxonomy Match|BOLD:AAE1613  
 Orthocladus frigidus|BIOUG15464-F06|Kate Perez|BIN Taxonomy Match|BOLD:AAE1613  
 Orthocladus frigidus|EBAl-Ch234|Elisabeth Stur|morphology|BOLD:AAE1613  
 Orthocladus frigidus|BIOUG15541-A12|Kate Perez|BIN Taxonomy Match|BOLD:AAE1613  
 Orthocladus frigidus|BIOUG17065-D02|Kate Perez|BIN Taxonomy Match|BOLD:AAE1613  
 Orthocladus frigidus|BIOUG15540-C10|Kate Perez|BIN Taxonomy Match|BOLD:AAE1613  
 Orthocladus frigidus|CCDB24037-D02|Sofia Wiedenbrug|BIN Taxonomy Match|BOLD:AAE1613  
 Orthocladus frigidus|BIOUG15563-B08|Kate Perez|BIN Taxonomy Match|BOLD:AAE1613  
 Orthocladus frigidus|BIOUG15599-D04|Kate Perez|BIN Taxonomy Match|BOLD:AAE1613  
 Orthocladus frigidus|BIOUG15544-F10|Kate Perez|BIN Taxonomy Match|BOLD:AAE1613  
 Orthocladus frigidus|BIOUG16258-H09|Kate Perez|BIN Taxonomy Match|BOLD:AAE1613  
 Orthocladus frigidus|BIOUG15562-E07|Kate Perez|BIN Taxonomy Match|BOLD:AAE1613  
 Orthocladus frigidus|BIOUG15537-G11|Kate Perez|BIN Taxonomy Match|BOLD:AAE1613  
 Orthocladus frigidus|BIOUG15465-H01|Kate Perez|BIN Taxonomy Match|BOLD:AAE1613  
 Orthocladus frigidus|BIOUG16631-F07|Kate Perez|BIN Taxonomy Match|BOLD:AAE1613  
 Orthocladus frigidus|EBAl-Ch212|Elisabeth Stur|morphology|BOLD:AAE1613  
 Orthocladus frigidus|BIOUG17025-H07|Kate Perez|BIN Taxonomy Match|BOLD:AAE1613  
 Orthocladus frigidus|BIOUG15542-A06|Kate Perez|BIN Taxonomy Match|BOLD:AAE1613  
 Orthocladus frigidus|Finmark558|Elisabeth Stur|BOLD:AAE1613  
 Orthocladus rivulorum|Finmark19|Torbjorn Ekrem|BOLD:AAAM5388  
 Orthocladus rivulorum|Finmark542|Torbjorn Ekrem|BOLD:AAAM5388  
 Orthocladus rivulorum|Finmark492|Torbjorn Ekrem|BOLD:AAAM5388  
 Orthocladus frigidus|ZMUO.026009|Lauri Paasivirta|BOLD:ADF1431  
 Orthocladus lamellatus|ZMUO.025869|Lauri Paasivirta|BOLD:ADF1431  
 Orthocladus|ZMUO.025865|Lauri Paasivirta|BOLD:ADF1431  
 Orthocladus|ZMUO.025864|Lauri Paasivirta|BOLD:ADF1431  
 Orthocladus lamellatus|ZMUO.025905|Lauri Paasivirta|BOLD:ADF1431  
 Orthocladus lamellatus|ZMUO.025904|Lauri Paasivirta|BOLD:ADF1431  
 Orthocladus lamellatus|Finmark312|Elisabeth Stur|BOLD:AAV5070  
 Orthocladus lamellatus|Finmark296|Elisabeth Stur|BOLD:AAV5070  
 Eukiefferiella pseudomontana|Finmark875|G. A. Halvorsen|morphology|BOLD:ADG3574  
 Cricotopus trifascia|BIOUG15952-E02|Elisabeth Stur|BIN Taxonomy Match|BOLD:AAU2576  
 Cricotopus trifascia|BIOUG16297-D09|Kate Perez|BIN Taxonomy Match|BOLD:AAU2576  
 Cricotopus|BIOUG17120-G07|Kate Perez|BIN Taxonomy Match|BOLD:AAU2576  
 Cricotopus trifascia|BIOUG16329-G04|Kate Perez|BIN Taxonomy Match|BOLD:AAU2576  
 Cricotopus trifascia|BIOUG16434-B11|Kate Perez|BIN Taxonomy Match|BOLD:AAU2576  
 Cricotopus trifascia|NO76|Elisabeth Stur|Morphology|BOLD:AAU2576  
 Cricotopus trifascia|BIOUG15966-G06|Kate Perez|BIN Taxonomy Match|BOLD:AAU2576  
 Cricotopus trifascia|BIOUG15963-C09|Kate Perez|BIN Taxonomy Match|BOLD:AAU2576  
 Cricotopus trifascia|BIOUG15947-H08|Kate Perez|BIN Taxonomy Match|BOLD:AAU2576

Cricotopus trifascia|BIOUG15966-G06|Kate Perez|BIN Taxonomy Match|BOLD:AAU2576  
 Cricotopus trifascia|BIOUG15963-C09|Kate Perez|BIN Taxonomy Match|BOLD:AAU2576  
 Cricotopus trifascia|BIOUG15947-H08|Kate Perez|BIN Taxonomy Match|BOLD:AAU2576  
 Cricotopus trifascia|NHRS-BYWS00000134|Yngve Brodin|morphology|BOLD:AAU2576  
 Cricotopus trifascia|ZMUO.025262|Lauri Paasivirta|BOLD:AAU2576  
 Cricotopus trifascia|ZMUO.025261|Lauri Paasivirta|BOLD:AAU2576  
 Cricotopus trifascia|NHRS-BYWS00000488|Yngve Brodin|morphology|BOLD:AAU2576  
 Cricotopus trifascia|NHRS-BYWS00000349|Yngve Brodin|morphology|BOLD:AAU2576  
 Cricotopus trifascia|NHRS-BYWS00000286|Yngve Brodin|morphology|BOLD:AAU2576  
 Cricotopus trifascia|NHRS-BYWS00000259|Yngve Brodin|morphology|BOLD:AAU2576  
 Cricotopus trifascia|NHRS-BYWS00000145|Yngve Brodin|morphology|BOLD:AAU2576  
 Cricotopus trifascia|NHRS-BYWS00000132|Yngve Brodin|morphology|BOLD:AAU2576  
 Cricotopus trifascia|NHRS-BYWS000001870|Yngve Brodin|BOLD:AAU2576  
 Cricotopus trifascia|NHRS-BYWS000001869|Yngve Brodin|BOLD:AAU2576  
 Cricotopus fuscus|Finmark757|Torbjorn Ekrem|BOLD:ACD1666  
 Cricotopus cf. septentrionalis|BIOUG15952-F10|Kate Perez|BIN Taxonomy Match|BOLD:ABA3995  
 Cricotopus cf. septentrionalis|BIOUG15953-H08|Kate Perez|BIN Taxonomy Match|BOLD:ABA3995  
 Cricotopus cf. septentrionalis|BIOUG15949-A12|Kate Perez|BIN Taxonomy Match|BOLD:ABA3995  
 Cricotopus cf. septentrionalis|BIOUG15947-E11|Kate Perez|BIN Taxonomy Match|BOLD:ABA3995  
 Cricotopus cf. septentrionalis|BIOUG15953-B03|Kate Perez|BIN Taxonomy Match|BOLD:ABA3995  
 Cricotopus cf. septentrionalis|NO75|Elisabeth Stur|BOLD:ABA3995  
 Cricotopus cf. septentrionalis|BIOUG15953-B05|Kate Perez|BIN Taxonomy Match|BOLD:ABA3995  
 Cricotopus cf. septentrionalis|BIOUG15947-F04|Kate Perez|BIN Taxonomy Match|BOLD:ABA3995  
 Cricotopus cf. septentrionalis|BIOUG15952-G09|Kate Perez|BIN Taxonomy Match|BOLD:ABA3995  
 Cricotopus cf. septentrionalis|BIOUG15965-B01|Kate Perez|BIN Taxonomy Match|BOLD:ABA3995  
 Cricotopus cf. septentrionalis|BIOUG15947-A10|Kate Perez|BIN Taxonomy Match|BOLD:ABA3995  
 Cricotopus cf. septentrionalis|BIOUG15965-E08|Kate Perez|BIN Taxonomy Match|BOLD:ABA3995  
 Cricotopus cf. septentrionalis|BIOUG16597-B02|Kate Perez|BIN Taxonomy Match|BOLD:ABA3995  
 Cricotopus cf. septentrionalis|ATNA533|Elisabeth Stur|BOLD:ABA3995  
 Cricotopus cf. septentrionalis|BIOUG15949-E08|Kate Perez|BIN Taxonomy Match|BOLD:ABA3995  
 Cricotopus cf. septentrionalis|BIOUG15965-F11|Kate Perez|BIN Taxonomy Match|BOLD:ABA3995  
 Cricotopus cf. septentrionalis|BIOUG15965-C02|Kate Perez|BIN Taxonomy Match|BOLD:ABA3995  
 Cricotopus cf. septentrionalis|BIOUG15967-F04|Kate Perez|BIN Taxonomy Match|BOLD:ABA3995  
 Cricotopus cf. septentrionalis|BIOUG15949-E02|Kate Perez|BIN Taxonomy Match|BOLD:ABA3995  
 Cricotopus cf. septentrionalis|BIOUG15947-F06|Kate Perez|BIN Taxonomy Match|BOLD:ABA3995  
 Cricotopus cf. septentrionalis|BIOUG15947-F05|Kate Perez|BIN Taxonomy Match|BOLD:ABA3995  
 Cricotopus cf. septentrionalis|BIOUG15905-H02|Kate Perez|BIN Taxonomy Match|BOLD:ABA3995  
 Cricotopus cf. septentrionalis|BIOUG15905-F09|Kate Perez|BIN Taxonomy Match|BOLD:ABA3995  
 Cricotopus cf. septentrionalis|BIOUG15905-E10|Kate Perez|BIN Taxonomy Match|BOLD:ABA3995  
 Cricotopus cf. septentrionalis|BIOUG15905-D02|Kate Perez|BIN Taxonomy Match|BOLD:ABA3995  
 Cricotopus cf. septentrionalis|BIOUG15905-C09|Kate Perez|BIN Taxonomy Match|BOLD:ABA3995  
 Cricotopus cf. septentrionalis|BIOUG15966-B01|Kate Perez|BIN Taxonomy Match|BOLD:ABA3995  
 Cricotopus cf. septentrionalis|BIOUG15809-H06|Kate Perez|BIN Taxonomy Match|BOLD:ABA3995  
 Cricotopus cf. septentrionalis|BIOUG16205-E01|Kate Perez|BIN Taxonomy Match|BOLD:ABA3995  
 Cricotopus cf. septentrionalis|BIOUG16596-F08|Kate Perez|BIN Taxonomy Match|BOLD:ABA3995  
 Cricotopus cf. septentrionalis|BIOUG15905-B02|Kate Perez|BIN Taxonomy Match|BOLD:ABA3995  
 Cricotopus cf. septentrionalis|BIOUG15954-E02|Kate Perez|BIN Taxonomy Match|BOLD:ABA3995  
 Cricotopus cf. septentrionalis|BIOUG15951-H07|Kate Perez|BIN Taxonomy Match|BOLD:ABA3995  
 Cricotopus cf. septentrionalis|BIOUG15951-D11|Kate Perez|BIN Taxonomy Match|BOLD:ABA3995  
 Cricotopus cf. septentrionalis|BIOUG15953-H07|Kate Perez|BIN Taxonomy Match|BOLD:ABA3995  
 Cricotopus cf. septentrionalis|BIOUG15951-A04|Kate Perez|BIN Taxonomy Match|BOLD:ABA3995  
 Cricotopus cf. septentrionalis|BIOUG15947-D02|Kate Perez|BIN Taxonomy Match|BOLD:ABA3995  
 Cricotopus cf. septentrionalis|BIOUG15947-F12|Kate Perez|BIN Taxonomy Match|BOLD:ABA3995  
 Cricotopus cf. septentrionalis|BIOUG15952-G03|Kate Perez|BIN Taxonomy Match|BOLD:ABA3995  
 Cricotopus cf. septentrionalis|ATNA558|Elisabeth Stur|BOLD:ABA3995  
 Cricotopus cf. septentrionalis|BIOUG15953-E01|Kate Perez|BIN Taxonomy Match|BOLD:ABA3995  
 Cricotopus cf. septentrionalis|BIOUG15964-A03|Kate Perez|BIN Taxonomy Match|BOLD:ABA3995  
 Cricotopus cf. septentrionalis|BIOUG16596-C11|Kate Perez|BIN Taxonomy Match|BOLD:ABA3995  
 Cricotopus cf. septentrionalis|BIOUG16296-B03|Kate Perez|BIN Taxonomy Match|BOLD:ABA3995  
 Cricotopus cf. septentrionalis|BIOUG16477-E06|Kate Perez|BIN Taxonomy Match|BOLD:ABA3995  
 Cricotopus cf. septentrionalis|BIOUG16597-G11|Kate Perez|BIN Taxonomy Match|BOLD:ABA3995  
 Cricotopus cf. septentrionalis|BIOUG15967-A03|Kate Perez|BIN Taxonomy Match|BOLD:ABA3995  
 Cricotopus cf. septentrionalis|PK-189-8|Elisabeth Stur|BIN Taxonomy Match?  
 Cricotopus cf. septentrionalis|PK-189-5|Elisabeth Stur|BIN Taxonomy Match?|BOLD:ABA3995  
 Cricotopus cf. septentrionalis|PK-188-11|Elisabeth Stur|BIN Taxonomy Match?|BOLD:ABA3995  
 Cricotopus cf. septentrionalis|PK-189-10|Elisabeth Stur|BIN Taxonomy Match?|BOLD:ABA3995  
 Cricotopus cf. septentrionalis|PK-187-11|Elisabeth Stur|BIN Taxonomy Match|BOLD:ABA3995  
 Cricotopus cf. septentrionalis|BIOUG15951-F10|Kate Perez|BIN Taxonomy Match|BOLD:ABA3995  
 Cricotopus cf. septentrionalis|BIOUG15950-G08|Kate Perez|BIN Taxonomy Match|BOLD:ABA3995  
 Cricotopus cf. septentrionalis|BIOUG15951-C10|Kate Perez|BIN Taxonomy Match|BOLD:ABA3995  
 Cricotopus cf. septentrionalis|EBA1-Ch181|Elisabeth Stur|morphology|BOLD:ABA3995  
 Cricotopus cf. septentrionalis|ATNA570|Elisabeth Stur|BOLD:ABA3995  
 Cricotopus cf. septentrionalis|TRD-CH191|Elisabeth Stur|BOLD:ABA3995  
 Cricotopus cf. septentrionalis|NO67|Elisabeth Stur|BOLD:ABA3995  
 Cricotopus cf. septentrionalis|NO66|Elisabeth Stur|BOLD:ABA3995  
 Cricotopus cf. septentrionalis|NO64|Elisabeth Stur|BOLD:ABA3995  
 Cricotopus cf. septentrionalis|BIOUG15900-H08|Kate Perez|BIN Taxonomy Match|BOLD:ABA3995  
 Heliella|BIOUG36987-F07|Kate Perez|BIN Taxonomy Match (Jul 2018)|BOLD:AA5342  
 Heliella|BIOUG36992-C03|Kate Perez|BIN Taxonomy Match (Jul 2018)|BOLD:AA5342  
 Heliella|BIOUG36992-E12|Kate Perez|BIN Taxonomy Match (Jul 2018)|BOLD:AA5342  
 Heliella|BIOUG36841-D10|Kate Perez|BIN Taxonomy Match (Jul 2018)|BOLD:AA5342  
 Heliella|BIOUG36677-D12|Kate Perez|BIN Taxonomy Match (May 2018)|BOLD:AA5342  
 Heliella|BIOUG36677-G09|Kate Perez|BIN Taxonomy Match (May 2018)|BOLD:AA5342  
 Heliella|BIOUG36680-E08|Kate Perez|BIN Taxonomy Match (May 2018)|BOLD:AA5342  
 Heliella|BIOUG36682-A06|Kate Perez|BIN Taxonomy Match (Jul 2018)|BOLD:AA5342  
 Heliella|BIOUG36681-G02|Kate Perez|BIN Taxonomy Match (Jul 2018)|BOLD:AA5342  
 Heliella|BIOUG36934-E10|Kate Perez|BIN Taxonomy Match (Jul 2018)|BOLD:AA5342  
 Heliella|BIOUG36931-B10|Kate Perez|BIN Taxonomy Match (May 2018)|BOLD:AA5342  
 Heliella|BIOUG36934-C04|Kate Perez|BIN Taxonomy Match (Jul 2018)|BOLD:AA5342  
 Heliella|BIOUG36779-A02|Kate Perez|BIN Taxonomy Match (May 2018)|BOLD:AA5342  
 Heliella|BIOUG36931-A07|Kate Perez|BIN Taxonomy Match (May 2018)|BOLD:AA5342  
 Heliella|BIOUG36681-H05|Kate Perez|BIN Taxonomy Match (Jul 2018)|BOLD:AA5342  
 Heliella|BIOUG36681-C03|Kate Perez|BIN Taxonomy Match (Jul 2018)|BOLD:AA5342  
 Heliella|BIOUG36934-A11|Kate Perez|BIN Taxonomy Match (Jul 2018)|BOLD:AA5342  
 Heliella|BIOUG36776-B09|Kate Perez|BIN Taxonomy Match (Jul 2018)|BOLD:AA5342  
 Heliella|BIOUG36932-C11|Kate Perez|BIN Taxonomy Match (Jul 2018)|BOLD:AA5342  
 Heliella|BIOUG36933-C11|Kate Perez|BIN Taxonomy Match (Jul 2018)|BOLD:AA5342  
 Heliella|BIOUG36762-D09|Kate Perez|BIN Taxonomy Match (May 2018)|BOLD:AA5342  
 Heliella|BIOUG36820-F02|Kate Perez|BIN Taxonomy Match (Jul 2018)|BOLD:AA5342  
 Heliella|BIOUG36987-F12|Kate Perez|BIN Taxonomy Match (Jul 2018)|BOLD:AA5342  
 Heliella|BIOUG36778-C09|Kate Perez|BIN Taxonomy Match (Jul 2018)|BOLD:AA5342  
 Heliella|BIOUG36677-C04|Kate Perez|BIN Taxonomy Match (May 2018)|BOLD:AA5342  
 Heliella|BIOUG36677-G08|Kate Perez|BIN Taxonomy Match (May 2018)|BOLD:AA5342

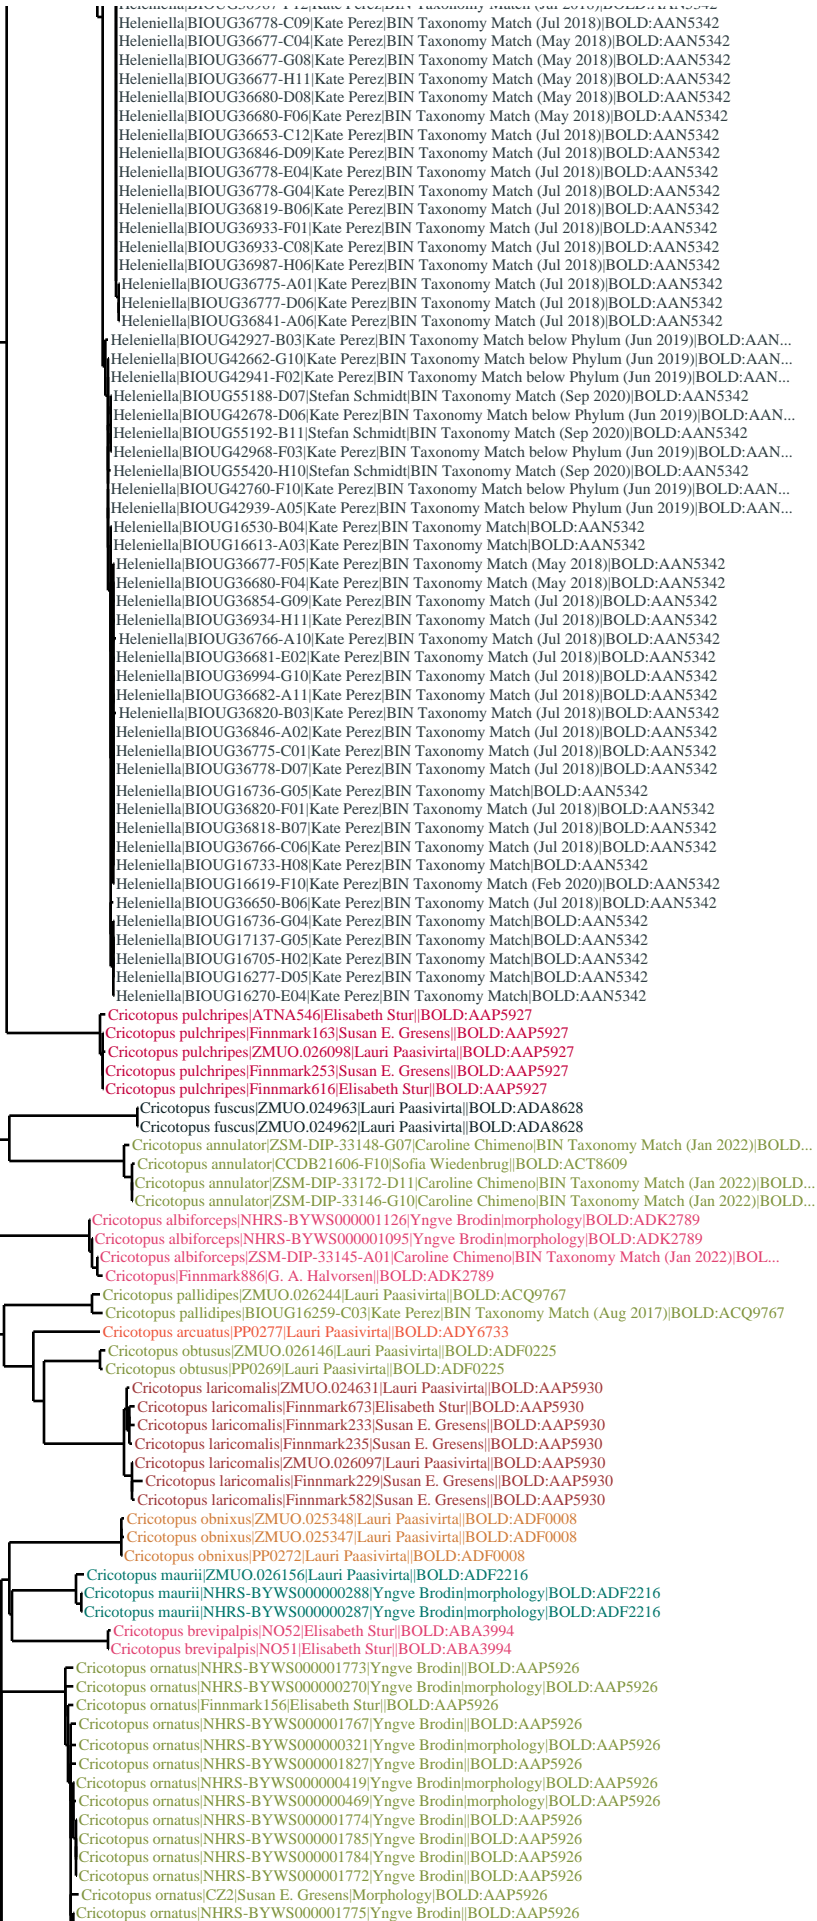

Cricotopus ornatus|NHRS-BYWS00000172|Yngve Brodin|BOLD:AAF5926  
Cricotopus ornatus|CZ2|Susan E. Gresens|Morphology|BOLD:AAF5926  
Cricotopus ornatus|NHRS-BYWS000001775|Yngve Brodin|BOLD:AAF5926  
Cricotopus ornatus|NHRS-BYWS00000477|Yngve Brodin|morphology|BOLD:AAF5926  
Cricotopus ornatus|NHRS-BYWS000001766|Yngve Brodin|BOLD:AAF5926  
Cricotopus ornatus|Finmark639|Elisabeth Stur|BOLD:AAF5926  
Cricotopus ornatus|Finmark635|Elisabeth Stur|BOLD:AAF5926  
Cricotopus maurii|ZMUO.026155|Lauri Paasivirta|BOLD:ACR2716  
Cricotopus|ZSM-DIP-33133-F11|Caroline Chimenó|BIN Taxonomy Match (Jan 2022)|BOLD:ACR2716  
Cricotopus trifasciatus|ZMUO.026171|Lauri Paasivirta|BOLD:ACR2716  
Cricotopus trifasciatus|ZMUO.026170|Lauri Paasivirta|BOLD:ACR2716  
Cricotopus suspiciosus|ZMUO.026246|Lauri Paasivirta|BOLD:ACR2716  
Cricotopus suspiciosus|ZMUO.026245|Lauri Paasivirta|BOLD:ACR2716  
Cricotopus sp. 32ES|TRD-CH135|Elisabeth Stur|Morphology|BOLD:ACR2716  
Cricotopus laetus|ZMUO.025377|Lauri Paasivirta|BOLD:ADF1390  
Cricotopus pilitarsis|NHRS-BYWS00000217|Yngve Brodin|morphology|BOLD:ACE7183  
Cricotopus pilitarsis|ZMUO.025146|Lauri Paasivirta|BOLD:ACE7183  
Cricotopus pilitarsis|ZMUO.025145|Lauri Paasivirta|BOLD:ACE7183  
Cricotopus pilitarsis|NHRS-BYWS00000336|Yngve Brodin|morphology|BOLD:ACE7183  
Cricotopus pilitarsis|NHRS-BYWS00000582|Yngve Brodin|morphology|BOLD:ACE7183  
Cricotopus pilitarsis|NHRS-BYWS00000569|Yngve Brodin|morphology|BOLD:ACE7183  
Cricotopus pilitarsis|NHRS-BYWS00000568|Yngve Brodin|morphology|BOLD:ACE7183  
Cricotopus pilitarsis|NHRS-BYWS00000457|Yngve Brodin|morphology|BOLD:ACE7183  
Cricotopus pilitarsis|NHRS-BYWS00000456|Yngve Brodin|morphology|BOLD:ACE7183  
Cricotopus pilitarsis|NO 77|Torbjorn Ekrem|Morphology|BOLD:ACE7183  
Cricotopus trinctus|ZMUO.026247|Lauri Paasivirta|BOLD:AEG4456  
Cricotopus|BIOUG36735-D11|Kate Perez|BIN Taxonomy Match (May 2018)|BOLD:AEG4456  
Cricotopus|BIOUG06095-B06|Kate Perez|BIN Taxonomy Match|BOLD:AEG4456  
Cricotopus|BIOUG06088-C07|Kate Perez|BIN Taxonomy Match|BOLD:AEG4456  
Cricotopus sp. 5ES|Finmark356|Elisabeth Stur|BOLD:AAV1709  
Cricotopus trifasciatus|SEG116|Susan E. Gresens|BOLD:ACX4176  
Cricotopus trifasciatus|SEG118|Susan E. Gresens|BOLD:ACX4176  
Cricotopus trifasciatus|SEG117|Susan E. Gresens|BOLD:ACX4176  
Cricotopus trifasciatus|SEG120|Susan E. Gresens|BOLD:ACX4176  
Cricotopus laetus|ZMUO.025376|Lauri Paasivirta|BOLD:AAA5299  
Cricotopus sylvestris|NHRS-BYWS000001776|Yngve Brodin|BOLD:AAA5299  
Cricotopus sylvestris|SEG124|Susan E. Gresens|BOLD:AAA5299  
Cricotopus sylvestris|NHRS-BYWS00000504|Yngve Brodin|morphology|BOLD:AAA5299  
Cricotopus sylvestris|NHRS-BYWS00000458|Yngve Brodin|morphology|BOLD:AAA5299  
Cricotopus sylvestris|NHRS-BYWS000001740|Yngve Brodin|BOLD:AAA5299  
Cricotopus sylvestris|ZMUO.024561|Lauri Paasivirta|BOLD:AAA5299  
Cricotopus sylvestris|NHRS-BYWS000001840|Yngve Brodin|BOLD:AAA5299  
Cricotopus sylvestris|NHRS-BYWS000001794|Yngve Brodin|BOLD:AAA5299  
Cricotopus sylvestris|NHRS-BYWS000001742|Yngve Brodin|BOLD:AAA5299  
Cricotopus sylvestris|NHRS-BYWS00000403|Yngve Brodin|morphology|BOLD:AAA5299  
Cricotopus sylvestris|NHRS-BYWS000001741|Yngve Brodin|BOLD:AAA5299  
Cricotopus sylvestris|NHRS-BYWS00000380|Yngve Brodin|morphology|BOLD:AAA5299  
Cricotopus sylvestris|NHRS-BYWS00000489|Yngve Brodin|morphology|BOLD:AAA5299  
Cricotopus sylvestris|NHRS-BYWS00000335|Yngve Brodin|morphology|BOLD:AAA5299  
Cricotopus sylvestris|RIN\_CH83|Mona Renate Saurasunet|BOLD Identification engine|BOLD:AAA5299  
Cricotopus sylvestris|RIN\_CH37|Mona Renate Saurasunet|BOLD Identification engine|BOLD:AAA5299  
Cricotopus|BIOUG42760-G11|Kate Perez|BIN Taxonomy Match below Phylum (Jun 2019)|BOLD:AAA...  
Cricotopus|BIOUG42671-G03|Kate Perez|BIN Taxonomy Match below Phylum (Jun 2019)|BOLD:AAA...  
Cricotopus|BIOUG55116-E11|Stefan Schmidt|BIN Taxonomy Match (Sep 2020)|BOLD:AAA5299  
Cricotopus|BIOUG42743-C06|Kate Perez|BIN Taxonomy Match below Phylum (Jun 2019)|BOLD:AAA...  
Cricotopus sylvestris|NHRS-BYWS000001149|Yngve Brodin|morphology|BOLD:AAA5299  
Cricotopus|BIOUG42744-C06|Kate Perez|BIN Taxonomy Match below Phylum (Jun 2019)|BOLD:AAA...  
Cricotopus sylvestris|EJV-20110106|Lauri Paasivirta|BOLD:AAA5299  
Cricotopus sylvestris|NHRS-BYWS000001739|Yngve Brodin|BOLD:AAA5299  
Cricotopus sylvestris|RIN\_CH26|Mona Renate Saurasunet|BOLD Identification engine|BOLD:AAA5299  
Cricotopus sylvestris|SEG122|Susan E. Gresens|BOLD:AAA5299  
Cricotopus sylvestris|TRD-CH51|Elisabeth Stur|BOLD:AAA5299  
Cricotopus sylvestris|RIN\_CH66|Mona Renate Saurasunet|BOLD Identification engine|BOLD:AAA5299  
Cricotopus sylvestris|RIN\_CH60|Mona Renate Saurasunet|BOLD Identification engine|BOLD:AAA5299  
Cricotopus sylvestris|RIN\_CH07|Mona Renate Saurasunet|morphology|BOLD:AAA5299  
Cricotopus sylvestris|RIN\_CH03|Mona Renate Saurasunet|BOLD Identification engine|BOLD:AAA5299  
Cricotopus sylvestris|RIN\_CH57|Mona Renate Saurasunet|BOLD Identification engine|BOLD:AAA5299  
Cricotopus sylvestris|RIN\_CH90|Mona Renate Saurasunet|BOLD Identification engine|BOLD:AAA5299  
Cricotopus sylvestris|CCDB24228-B02|Sofia Wiedenbrug|BIN Taxonomy Match|BOLD:AAA5299  
Cricotopus sylvestris|CCDB24228-A08|Sofia Wiedenbrug|BIN Taxonomy Match|BOLD:AAA5299  
Cricotopus sylvestris|CCDB24228-A07|Sofia Wiedenbrug|BIN Taxonomy Match|BOLD:AAA5299  
Chironomidae|CCDB24228-B01|BIN Taxonomy Match  
Cricotopus|ZSM34343-H01|Sofia Wiedenbrug|Morphology  
Cricotopus|BIOUG42752-B09|Kate Perez|BIN Taxonomy Match below Phylum (Jun 2019)|BOLD:AAA...  
Cricotopus sylvestris|NHRS-BYWS00000251|Yngve Brodin|morphology|BOLD:AAA5299  
Cricotopus glacialis|CH-eik72|Elisabeth Stur|BOLD:AAA5299  
Cricotopus sylvestris|NHRS-BYWS00000434|Yngve Brodin|morphology|BOLD:AAA5299  
Cricotopus glacialis|CH-OSF187|Elisabeth Stur|BOLD:AAA5299  
Cricotopus|BIOUG36649-B02|Kate Perez|BIN Taxonomy Match (Jan 2019)|BOLD:AAA5299  
Cricotopus sylvestris|RIN\_CH44|Mona Renate Saurasunet|BOLD Identification engine|BOLD:AAA5299  
Cricotopus sylvestris|NHRS-BYWS000001823|Yngve Brodin|BOLD:AAA5299  
Cricotopus sylvestris|EJV-20110105|Lauri Paasivirta|BOLD:AAA5299  
Cricotopus sylvestris|EJV-20110108|Lauri Paasivirta|BOLD:AAA5299  
Cricotopus sylvestris|EJV-20110107|Lauri Paasivirta|BOLD:AAA5299  
Cricotopus|ZSM-DIP-33170-B11|Caroline Chimenó|BIN Taxonomy Match (Jan 2022)|BOLD:AAA5299  
Cricotopus sylvestris|CZ8|Susan E. Gresens|BOLD:AAA5299  
Cricotopus sylvestris|NHRS-BYWS000001087|Yngve Brodin|morphology|BOLD:AAA5299  
Cricotopus sylvestris|CZ1|Susan E. Gresens|Morphology|BOLD:AAA5299  
Cricotopus sylvestris|CZ9|Susan E. Gresens|BOLD:AAA5299  
Cricotopus sylvestris|CZ5|Susan E. Gresens|Morphology|BOLD:AAA5299  
Cricotopus sylvestris|CZ4|Susan E. Gresens|Morphology|BOLD:AAA5299  
Cricotopus sylvestris|NHRS-BYWS00000478|Yngve Brodin|morphology|BOLD:AAA5299  
Cricotopus sylvestris|BC-ZSM-DIP-22551-F02|Dieter Doezkal|BOLD:AAA5299  
Cricotopus glacialis|NO50|Elisabeth Stur|BOLD:AAA5299  
Cricotopus|ZSM-DIP-33147-F04|Caroline Chimenó|BIN Taxonomy Match (Jan 2022)|BOLD:AAA5299  
Cricotopus sylvestris|CZ7|Susan E. Gresens|BOLD:AAA5299  
Cricotopus sylvestris|ZMUO.024562|Lauri Paasivirta|BOLD:AAA5299  
Cricotopus sylvestris|ZSM34343-C11|Sofia Wiedenbrug|Morphology|BOLD:AAA5299  
Cricotopus|BIOUG36992-G06|Kate Perez|BIN Taxonomy Match (Jan 2019)|BOLD:AAA5299  
Cricotopus sylvestris|NHRS-BYWS000001044|Yngve Brodin|morphology|BOLD:AAA5299  
Cricotopus sylvestris|NHRS-BYWS00000548|Yngve Brodin|morphology|BOLD:AAA5299  
Cricotopus sylvestris|NHRS-BYWS00000337|Yngve Brodin|morphology|BOLD:AAA5299  
Cricotopus sylvestris|NHRS-BYWS00000218|Yngve Brodin|morphology|BOLD:AAA5299

Cricotopus sylvestris|NHRS-BYWS00000548|Yngve Brodin|morphology|BOLD:AAA5299  
 Cricotopus sylvestris|NHRS-BYWS00000337|Yngve Brodin|morphology|BOLD:AAA5299  
 Cricotopus sylvestris|NHRS-BYWS00000218|Yngve Brodin|morphology|BOLD:AAA5299  
 Cricotopus|ES400|Elisabeth Stur|morphology|BOLD:AAA5299  
 Cricotopus|ES395|Elisabeth Stur|morphology|BOLD:AAA5299  
 Cricotopus glacialis|TRD-CH52|Elisabeth Stur|BOLD:AAA5299  
 Cricotopus sylvestris|NO74|Elisabeth Stur|BOLD:AAA5299  
 Cricotopus sylvestris|RIN\_CH56|Mona Renate Saurasunet|BOLD Identification engine|BOLD:AAA5299  
 Cricotopus sylvestris|RIN\_CH55|Mona Renate Saurasunet|BOLD Identification engine|BOLD:AAA5299  
 Cricotopus sylvestris|RIN\_CH41|Mona Renate Saurasunet|BOLD Identification engine|BOLD:AAA5299  
 Cricotopus sylvestris|RIN\_CH36|Mona Renate Saurasunet|BOLD Identification engine|BOLD:AAA5299  
 Cricotopus sylvestris|RIN\_CH17|Mona Renate Saurasunet|BOLD Identification engine|BOLD:AAA5299  
 Cricotopus sylvestris|RIN\_CH16|Mona Renate Saurasunet|BOLD Identification engine|BOLD:AAA5299  
 Cricotopus sylvestris|TRD-CH41|Elisabeth Stur|BOLD:AAA5299  
 Cricotopus glacialis|TRD-CH10|Elisabeth Stur|BOLD:AAA5299  
 Cricotopus sylvestris|NHRS-BYWS000001795|Yngve Brodin|BOLD:AAA5299  
 Cricotopus glacialis|NO62|Elisabeth Stur|BOLD:AAA5299  
 Cricotopus glacialis|NO49|Elisabeth Stur|BOLD:AAA5299  
 Cricotopus relucens|ZMUO.025156|Lauri Paasivirta|BOLD:AAA5299  
 Cricotopus relucens|ZMUO.025155|Lauri Paasivirta|BOLD:AAA5299  
 Cricotopus sylvestris|NHRS-BYWS00000961|Yngve Brodin|morphology|BOLD:AAA5299  
 Cricotopus sp. 3ES|Finmark175|Elisabeth Stur|BOLD:AAA5299  
 Cricotopus sp. 3ES|Finmark874|Elisabeth Stur|morphology|BOLD:AAA5299  
 Cricotopus sp. 3ES|Finmark192|Elisabeth Stur|BOLD:AAA5299  
 Cricotopus sp. 3ES|Finmark512|Elisabeth Stur|BOLD:AAA5299  
 Cricotopus sp. 3ES|Finmark580|Elisabeth Stur|BOLD:AAA5299  
 Paracladius quadrinodosus|BC-ZSM-DIP-22551-F09|Dieter Doczka||BOLD:ACX3335  
 Paracladius quadrinodosus|TRD-CH372|Elisabeth Stur|morphology|BOLD:ACX3335  
 Paracladius conversus|ZMUO.024583|Lauri Paasivirta||BOLD:ADA6481  
 Paracladius conversus|ZMUO.024582|Lauri Paasivirta||BOLD:ADA6481  
 Cricotopus perniger|Finmark203|Susan E. Gresens||BOLD:AAP5929  
 Paracladius quadrinodosus|ZMUO.026056|Lauri Paasivirta|BOLD:ADF1770  
 Paracladius alpicola|ES388|Elisabeth Stur|BOLD:AAU3206  
 Paracladius alpicola|ES378|Elisabeth Stur|BOLD:AAU3206  
 Paracladius alpicola|Finmark401|Elisabeth Stur|BOLD:AAU3206  
 Paracladius alpicola|Finmark400|Elisabeth Stur|BOLD:AAU3206  
 Paracladius alpicola|Finmark389|Elisabeth Stur|BOLD:AAU3206  
 Cricotopus|BIOUG16218-E01|Kate Perez|BOLD ID Engine Manual|BOLD:ACQ9824  
 Cricotopus tremulus|BIOUG16478-D05|Kate Perez|BIN Taxonomy Match|BOLD:AAM6021  
 Cricotopus tremulus|Finmark130|Elisabeth Stur|BOLD:AAM6021  
 Cricotopus tremulus|BIOUG16435-F11|Kate Perez|BIN Taxonomy Match|BOLD:AAM6021  
 Cricotopus tremulus|BIOUG15951-C03|Kate Perez|BIN Taxonomy Match|BOLD:AAM6021  
 Cricotopus tremulus|BIOUG15954-G06|Kate Perez|BIN Taxonomy Match|BOLD:AAM6021  
 Cricotopus tremulus|BIOUG16426-H11|Kate Perez|BIN Taxonomy Match|BOLD:AAM6021  
 Cricotopus tremulus|BIOUG16430-D04|Kate Perez|BIN Taxonomy Match|BOLD:AAM6021  
 Cricotopus tremulus|BIOUG15954-E05|Kate Perez|BIN Taxonomy Match|BOLD:AAM6021  
 Cricotopus tremulus|BIOUG15967-A11|Kate Perez|BIN Taxonomy Match|BOLD:AAM6021  
 Cricotopus tremulus|BIOUG16198-A04|Kate Perez|BIN Taxonomy Match|BOLD:AAM6021  
 Cricotopus tremulus|BIOUG16258-A11|Kate Perez|BIN Taxonomy Match|BOLD:AAM6021  
 Cricotopus tremulus|BIOUG15954-C11|Kate Perez|BIN Taxonomy Match|BOLD:AAM6021  
 Cricotopus tremulus|BIOUG16477-A07|Kate Perez|BIN Taxonomy Match|BOLD:AAM6021  
 Cricotopus tremulus|BIOUG16258-E09|Kate Perez|BIN Taxonomy Match|BOLD:AAM6021  
 Cricotopus tremulus|BIOUG15954-G05|Kate Perez|BIN Taxonomy Match|BOLD:AAM6021  
 Cricotopus tremulus|BIOUG15952-B04|Kate Perez|BIN Taxonomy Match|BOLD:AAM6021  
 Cricotopus tremulus|BIOUG15951-B05|Kate Perez|BIN Taxonomy Match|BOLD:AAM6021  
 Cricotopus tremulus|BIOUG15948-G08|Kate Perez|BIN Taxonomy Match|BOLD:AAM6021  
 Cricotopus tremulus|BIOUG15947-G07|Kate Perez|BIN Taxonomy Match|BOLD:AAM6021  
 Cricotopus tremulus|BIOUG15947-F03|Kate Perez|BIN Taxonomy Match|BOLD:AAM6021  
 Cricotopus tremulus|BIOUG15947-A09|Kate Perez|BIN Taxonomy Match|BOLD:AAM6021  
 Cricotopus tremulus|BIOUG15954-A09|Kate Perez|BIN Taxonomy Match|BOLD:AAM6021  
 Cricotopus tremulus|BIOUG16477-D08|Kate Perez|BIN Taxonomy Match|BOLD:AAM6021  
 Cricotopus tremulus|BIOUG15949-H02|Kate Perez|BIN Taxonomy Match|BOLD:AAM6021  
 Cricotopus tremulus|BIOUG16478-G07|Kate Perez|BIN Taxonomy Match|BOLD:AAM6021  
 Cricotopus tremulus|BIOUG16478-D11|Kate Perez|BIN Taxonomy Match|BOLD:AAM6021  
 Cricotopus tremulus|BIOUG15905-D11|Kate Perez|BIN Taxonomy Match|BOLD:AAM6021  
 Cricotopus tremulus|BIOUG15950-A01|Kate Perez|BIN Taxonomy Match|BOLD:AAM6021  
 Cricotopus tremulus|BIOUG16333-D03|Kate Perez|BIN Taxonomy Match|BOLD:AAM6021  
 Cricotopus tremulus|BIOUG15948-G03|Kate Perez|BIN Taxonomy Match|BOLD:AAM6021  
 Cricotopus tremulus|BIOUG15905-E09|Kate Perez|BIN Taxonomy Match|BOLD:AAM6021  
 Cricotopus tremulus|BIOUG16479-G01|Kate Perez|BIN Taxonomy Match|BOLD:AAM6021  
 Cricotopus tremulus|BIOUG15947-C06|Kate Perez|BIN Taxonomy Match|BOLD:AAM6021  
 Cricotopus tremulus|BIOUG16198-E10|Kate Perez|BIN Taxonomy Match|BOLD:AAM6021  
 Cricotopus tremulus|BIOUG15967-E12|Kate Perez|BIN Taxonomy Match|BOLD:AAM6021  
 Cricotopus tremulus|BIOUG16480-B02|Kate Perez|BIN Taxonomy Match|BOLD:AAM6021  
 Cricotopus tremulus|BIOUG15950-D08|Kate Perez|BIN Taxonomy Match|BOLD:AAM6021  
 Cricotopus tremulus|BIOUG16479-A04|Kate Perez|BIN Taxonomy Match|BOLD:AAM6021  
 Cricotopus tremulus|BIOUG15954-D08|Kate Perez|BIN Taxonomy Match|BOLD:AAM6021  
 Cricotopus tremulus|BIOUG15905-B08|Kate Perez|BIN Taxonomy Match|BOLD:AAM6021  
 Cricotopus tremulus|BIOUG16432-B08|Kate Perez|BIN Taxonomy Match|BOLD:AAM6021  
 Cricotopus tremulus|BIOUG15900-G12|Kate Perez|BIN Taxonomy Match|BOLD:AAM6021  
 Cricotopus tremulus|BIOUG15963-D02|Kate Perez|BIN Taxonomy Match|BOLD:AAM6021  
 Cricotopus tremulus|BIOUG15963-D12|Kate Perez|BIN Taxonomy Match|BOLD:AAM6021  
 Cricotopus tremulus|BIOUG16261-C05|Kate Perez|BIN Taxonomy Match|BOLD:AAM6021  
 Cricotopus tremulus|BIOUG16261-G07|Kate Perez|BIN Taxonomy Match|BOLD:AAM6021  
 Cricotopus tremulus|BIOUG16433-C03|Kate Perez|BIN Taxonomy Match|BOLD:AAM6021  
 Cricotopus tremulus|BIOUG16430-G05|Kate Perez|BIN Taxonomy Match|BOLD:AAM6021  
 Cricotopus tremulus|BIOUG15953-E10|Kate Perez|BIN Taxonomy Match|BOLD:AAM6021  
 Cricotopus tremulus|ZMUO.026159|Lauri Paasivirta||BOLD:AAM6021  
 Cricotopus tremulus|BIOUG15951-H10|Kate Perez|BIN Taxonomy Match|BOLD:AAM6021  
 Cricotopus tremulus|BIOUG15950-C06|Kate Perez|BIN Taxonomy Match|BOLD:AAM6021  
 Cricotopus tremulus|BIOUG16432-A09|Kate Perez|BIN Taxonomy Match|BOLD:AAM6021  
 Cricotopus tremulus|ZMUO.026158|Lauri Paasivirta||BOLD:AAM6021  
 Cricotopus tremulus|BIOUG16259-E12|Kate Perez|BIN Taxonomy Match|BOLD:AAM6021  
 Cricotopus tremulus|BIOUG16332-D01|Kate Perez|BIN Taxonomy Match|BOLD:AAM6021  
 Cricotopus tremulus|BIOUG16597-F12|Kate Perez|BIN Taxonomy Match|BOLD:AAM6021  
 Cricotopus tremulus|BIOUG16598-A05|Kate Perez|BIN Taxonomy Match|BOLD:AAM6021  
 Cricotopus tremulus|BIOUG15947-B12|Kate Perez|BIN Taxonomy Match|BOLD:AAM6021  
 Cricotopus tremulus|BIOUG15948-F03|Kate Perez|BIN Taxonomy Match|BOLD:AAM6021  
 Cricotopus tremulus|BIOUG15948-H05|Kate Perez|BIN Taxonomy Match|BOLD:AAM6021  
 Cricotopus tremulus|BIOUG15954-C10|Kate Perez|BIN Taxonomy Match|BOLD:AAM6021  
 Cricotopus tremulus|BIOUG15963-C02|Kate Perez|BIN Taxonomy Match|BOLD:AAM6021  
 Cricotopus tremulus|BIOUG15966-G10|Kate Perez|BIN Taxonomy Match|BOLD:AAM6021  
 Cricotopus tremulus|BIOUG15799-G11|Kate Perez|BIN Taxonomy Match|BOLD:AAM6021



\*Cricotopus sp. 20230711nnnkk0401e1sabeu1 2011|BOLD:AAV1707  
 Cricotopus vierriensis|ZSM-DIP-33133-A10|Caroline Chimento|BIN Taxonomy Match (Jan 2022)|BOL...  
 Cricotopus vierriensis|ZMUO.025312|Lauri Paasivirta|BOLD:ACU8434  
 Cricotopus vierriensis|ZMUO.025311|Lauri Paasivirta|BOLD:ACU8434  
 Cricotopus vierriensis|ZSM-DIP-33147-C11|Caroline Chimento|BIN Taxonomy Match (Jan 2022)|BOL...  
 Cricotopus vierriensis|ZSM-DIP-33147-E12|Caroline Chimento|BIN Taxonomy Match (Jan 2022)|BOL...  
 Cricotopus vierriensis|ZSM-DIP-33128-B04|Caroline Chimento|BIN Taxonomy Match (Jan 2022)|BOL...  
 Cricotopus vierriensis|ZSM-DIP-33146-F03|Caroline Chimento|BIN Taxonomy Match (Jan 2022)|BOL...  
 Cricotopus vierriensis|ZSM-DIP-33140-H04|Caroline Chimento|BIN Taxonomy Match (Jan 2022)|BOL...  
 Cricotopus vierriensis|BIOUG16894-D07|Kate Perez|BIN Taxonomy Match (Jul 2019)|BOLD:ACU8434  
 Cricotopus|BIOUG16706-F04|Kate Perez|BOLD ID Engine Manual|BOLD:ACQ9937  
 Cricotopus|BIOUG16996-G01|Kate Perez|BOLD ID Engine Manual|BOLD:ACQ9937  
 Cricotopus|BIOUG16997-B09|Kate Perez|BOLD ID Engine Manual|BOLD:ACQ9937  
 Cricotopus|BIOUG16900-G01|Kate Perez|BOLD ID Engine Manual|BOLD:ACQ9937  
 Cricotopus|BIOUG17094-C07|Kate Perez|BOLD ID Engine Manual|BOLD:ACQ9937  
 Cricotopus|BIOUG16614-D09|Kate Perez|BOLD ID Engine Manual|BOLD:ACQ9937  
 Cricotopus bicinctus|BIOUG17225-G07|Kate Perez|BIN Taxonomy Match|BOLD:AAT9677  
 Cricotopus bicinctus|ZMUO.024687|Lauri Paasivirta|BOLD:AAT9677  
 Cricotopus bicinctus|ZMUO.024686|Lauri Paasivirta|BOLD:AAT9677  
 Cricotopus bicinctus|NHRS-BYWS000000260|Yngve Brodin|morphology|BOLD:AAT9677  
 Cricotopus bicinctus|NHRS-BYWS000000133|Yngve Brodin|morphology|BOLD:AAT9677  
 Cricotopus bicinctus|BIOUG16597-H04|Kate Perez|BIN Taxonomy Match|BOLD:AAT9677  
 Cricotopus bicinctus|BIOUG15949-F09|Kate Perez|BIN Taxonomy Match|BOLD:AAT9677  
 Cricotopus bicinctus|BIOUG16198-E12|Kate Perez|BIN Taxonomy Match|BOLD:AAT9677  
 Cricotopus bicinctus|BIOUG16477-C11|Kate Perez|BIN Taxonomy Match|BOLD:AAT9677  
 Cricotopus bicinctus|BIOUG16479-D10|Kate Perez|BIN Taxonomy Match|BOLD:AAT9677  
 Cricotopus bicinctus|BIOUG16434-B06|Kate Perez|BIN Taxonomy Match|BOLD:AAT9677  
 Cricotopus bicinctus|BIOUG16435-A12|Kate Perez|BIN Taxonomy Match|BOLD:AAT9677  
 Cricotopus bicinctus|BIOUG16477-F06|Kate Perez|BIN Taxonomy Match|BOLD:AAT9677  
 Cricotopus bicinctus|BIOUG16551-F08|Kate Perez|BIN Taxonomy Match|BOLD:AAT9677  
 Cricotopus bicinctus|BIOUG15964-C10|Kate Perez|BIN Taxonomy Match|BOLD:AAT9677  
 Cricotopus bicinctus|BIOUG16552-C06|Kate Perez|BIN Taxonomy Match|BOLD:AAT9677  
 Cricotopus bicinctus|BIOUG15953-F08|Kate Perez|BIN Taxonomy Match|BOLD:AAT9677  
 Cricotopus bicinctus|BIOUG15949-A08|Kate Perez|BIN Taxonomy Match|BOLD:AAT9677  
 Cricotopus bicinctus|BIOUG15947-G01|Kate Perez|BIN Taxonomy Match|BOLD:AAT9677  
 Cricotopus bicinctus|NHRS-BYWS000000225|Yngve Brodin|morphology|BOLD:AAT9677  
 Cricotopus bicinctus|NHRS-BYWS000001796|Yngve Brodin|BOLD:AAT9677  
 Cricotopus bicinctus|NHRS-BYWS000000171|Yngve Brodin|morphology|BOLD:AAT9677  
 Cricotopus bicinctus|NHRS-BYWS000000902|Yngve Brodin|morphology|BOLD:AAT9677  
 Cricotopus bicinctus|EJV-20110103|Lauri Paasivirta|BOLD:AAT9677  
 Cricotopus bicinctus|EJV-20110102|Lauri Paasivirta|BOLD:AAT9677  
 Cricotopus bicinctus|NHRS-BYWS000001841|Yngve Brodin|BOLD:AAT9677  
 Cricotopus bicinctus|NHRS-BYWS000001771|Yngve Brodin|BOLD:AAT9677  
 Cricotopus bicinctus|NHRS-BYWS000001770|Yngve Brodin|BOLD:AAT9677  
 Cricotopus bicinctus|NHRS-BYWS000001748|Yngve Brodin|BOLD:AAT9677  
 Cricotopus bicinctus|NHRS-BYWS000001747|Yngve Brodin|BOLD:AAT9677  
 Cricotopus bicinctus|Finmark262|Elisabeth Stur|BOLD:AAT9677  
 Cricotopus bicinctus|BIOUG55120-C05|Stefan Schmidt|BIN Taxonomy Match (Sep 2020)|BOLD:AA...  
 Chironomidae|ZSM-DIP-33136-G02|Caroline Chimento|BIN Taxonomy Match (Jan 2022)|BOLD:AAI6018  
 Chironomidae|ZSM-DIP-33131-E12|Caroline Chimento|BIN Taxonomy Match (Jan 2022)|BOLD:AAI6018  
 Cricotopus bicinctus|BIOUG36761-C05|Kate Perez|BIN Taxonomy Match (Jul 2018)|BOLD:AAI6018  
 Cricotopus bicinctus|BIOUG36934-G12|Kate Perez|BIN Taxonomy Match (Jul 2018)|BOLD:AAI6018  
 Cricotopus bicinctus|ZSM-DIP-33135-A07|Caroline Chimento|BIN Taxonomy Match (Jan 2022)|BOLD...  
 Cricotopus|ES397|Elisabeth Stur|morphology|BOLD:AAI6018  
 Cricotopus bicinctus|ZSM-DIP-33137-G07|Caroline Chimento|BIN Taxonomy Match (Jan 2022)|BOLD...  
 Cricotopus bicinctus|Finmark838|Elisabeth Stur|BOLD:AAI6018  
 Cricotopus bicinctus|BIOUG17303-D03|Kate Perez|BIN Taxonomy Match|BOLD:AAI6018  
 Cricotopus bicinctus|ZSM-DIP-33135-A06|Caroline Chimento|BIN Taxonomy Match (Jan 2022)|BOLD...  
 Cricotopus bicinctus|BIOUG36766-D08|Kate Perez|BIN Taxonomy Match (Jul 2018)|BOLD:AAI6018  
 Cricotopus bicinctus|BIOUG16627-A11|Kate Perez|BIN Taxonomy Match|BOLD:AAI6018  
 Cricotopus bicinctus|BIOUG16712-C07|Kate Perez|BIN Taxonomy Match|BOLD:AAI6018  
 Chironomidae|ZSM-DIP-33138-C05|Caroline Chimento|BIN Taxonomy Match (Jan 2022)|BOLD:AAI6018  
 Chironomidae|ZSM-DIP-33131-E03|Caroline Chimento|BIN Taxonomy Match (Jan 2022)|BOLD:AAI6018  
 Cricotopus bicinctus|BIOUG16261-D12|Kate Perez|BIN Taxonomy Match|BOLD:AAI6018  
 Cricotopus bicinctus|ZSM-DIP-33147-E04|Caroline Chimento|BIN Taxonomy Match (Jan 2022)|BOLD...  
 Cricotopus bicinctus|TRD-CH173|Elisabeth Stur|BOLD:AAI6018  
 Cricotopus bicinctus|BIOUG16631-G08|Kate Perez|BIN Taxonomy Match|BOLD:AAI6018  
 Cricotopus bicinctus|BIOUG55119-B08|Stefan Schmidt|BIN Taxonomy Match (Sep 2020)|BOLD:AA...  
 Cricotopus bicinctus|ZSM-DIP-33149-H07|Caroline Chimento|BIN Taxonomy Match (Jan 2022)|BOLD...  
 Cricotopus bicinctus|BIOUG16712-A07|Kate Perez|BIN Taxonomy Match|BOLD:AAI6018  
 Cricotopus bicinctus|BIOUG16479-G10|Kate Perez|BIN Taxonomy Match|BOLD:AAI6018  
 Cricotopus bicinctus|BIOUG55126-D11|Stefan Schmidt|BIN Taxonomy Match (Sep 2020)|BOLD:AA...  
 Cricotopus bicinctus|ZSM-DIP-33147-C10|Caroline Chimento|BIN Taxonomy Match (Jan 2022)|BOLD...  
 Cricotopus bicinctus|NHRS-BYWS000000162|Yngve Brodin|morphology|BOLD:AAI6018  
 Cricotopus bicinctus|BIOUG36766-D06|Kate Perez|BIN Taxonomy Match (Jul 2018)|BOLD:AAI6018  
 Cricotopus bicinctus|BIOUG16711-G12|Kate Perez|BIN Taxonomy Match|BOLD:AAI6018  
 Cricotopus bicinctus|BIOUG55116-A02|Stefan Schmidt|BIN Taxonomy Match (Sep 2020)|BOLD:AA...  
 Cricotopus bicinctus|BIOUG16632-E08|Kate Perez|BIN Taxonomy Match|BOLD:AAI6018  
 Cricotopus bicinctus|CH-OSP98|Elisabeth Stur|BOLD:AAI6018  
 Cricotopus bicinctus|BIOUG55113-F08|Stefan Schmidt|BIN Taxonomy Match (Sep 2020)|BOLD:AA...  
 Cricotopus bicinctus|BIOUG42739-D01|Kate Perez|BIN Taxonomy Match below Phylum (Jun 2019)|B...  
 Cricotopus bicinctus|ZSM-DIP-33142-C03|Caroline Chimento|BIN Taxonomy Match (Jan 2022)|BOLD...  
 Cricotopus bicinctus|24529-A04|Kate Perez|BIN Taxonomy Match|BOLD:AAI6018  
 Cricotopus bicinctus|BIOUG16525-H11|Kate Perez|BIN Taxonomy Match|BOLD:AAI6018  
 Chironomidae|ZSM-DIP-33138-C04|Caroline Chimento|BIN Taxonomy Match (Jan 2022)|BOLD:AAI6018  
 Cricotopus bicinctus|BIOUG16358-B06|Kate Perez|BIN Taxonomy Match|BOLD:AAI6018  
 Cricotopus bicinctus|Finmark234|Elisabeth Stur|BOLD:AAE5673  
 Cricotopus bicinctus|NHRS-BYWS000000529|Yngve Brodin|morphology|BOLD:AAE5673  
 Cricotopus bicinctus|Finmark271|Elisabeth Stur|BOLD:AAE5673  
 Cricotopus festivellus|NHRS-BYWS000001075|Yngve Brodin|morphology|BOLD:AAV1707  
 Cricotopus festivellus|ZMUO.024646|Lauri Paasivirta|BOLD:AAV1707  
 Cricotopus festivellus|EJV-20110089|Lauri Paasivirta|BOLD:AAV1707  
 Cricotopus festivellus|Finmark705|Torbjorn Ekrem|BOLD:AAV1707  
 Cricotopus festivellus|EJV-20110091|Lauri Paasivirta|BOLD:AAV1707  
 Cricotopus festivellus|NHRS-BYWS000001051|Yngve Brodin|morphology|BOLD:AAV1707  
 Cricotopus festivellus|EJV-20110093|Lauri Paasivirta|BOLD:AAV1707  
 Cricotopus festivellus|EJV-20110090|Lauri Paasivirta|BOLD:AAV1707  
 Cricotopus festivellus|NO63|Torbjorn Ekrem|BOLD:AAV1707  
 Cricotopus festivellus|NHRS-BYWS000000532|Yngve Brodin|morphology|BOLD:AAV1707  
 Cricotopus festivellus|ZMUO.024647|Lauri Paasivirta|BOLD:AAV1707  
 Cricotopus festivellus|EJV-20110092|Lauri Paasivirta|BOLD:AAV1707  
 Cricotopus festivellus|NO73|Elisabeth Stur|BOLD:AAV1707  
 Cricotopus festivellus|NO60|Torbjorn Ekrem|BOLD:AAV1707



Cricotopus testiventris[EJV-20110092|Lauri Paasivirta|BOLD:AAV1707  
Cricotopus festivellus[NO73|Elisabeth Stur|BOLD:AAV1707  
Cricotopus festivellus[NO60|Torbjorn Ekrem|BOLD:AAV1707  
Cricotopus festivellus[NO56|Torbjorn Ekrem|BOLD:AAV1707  
Cricotopus festivellus[NO54|Torbjorn Ekrem|BOLD:AAV1707  
Cricotopus festivellus[NO53|Torbjorn Ekrem|BOLD:AAV1707  
Cricotopus festivellus[Finmark472|Torbjorn Ekrem|BOLD:AAV1707  
Cricotopus[BC-ZSM-DIP-22488-E08|Dieter Doczkal|BOLD:ACU4162  
Cricotopus[CCDB24039-A08|Sofia Wiedenbrug|BIN Taxonomy Match|BOLD:ACU4162  
Cricotopus flavocinctus[ZMUO.025101|Lauri Paasivirta|BOLD:ADA7280  
Cricotopus flavocinctus[ZMUO.025100|Lauri Paasivirta|BOLD:ADA7280  
Cricotopus[CCDB24229-A08|Sofia Wiedenbrug|BIN Taxonomy Match|BOLD:ACU4584  
Orthocladinae[BIOUG16859-B07|Kate Perez|BIN Taxonomy Match|BOLD:AAW4679  
Cricotopus rufiventris[EJV-20110176|Lauri Paasivirta|BOLD:AAW4679  
Cricotopus rufiventris[EJV-20110174|Lauri Paasivirta|BOLD:AAW4679  
Cricotopus rufiventris[EJV-20110175|Lauri Paasivirta|BOLD:AAW4679  
Cricotopus rufiventris[NHRS-BYWS000000521|Yngve Brodin|morphology|BOLD:AAM5377  
Cricotopus rufiventris[NHRS-BYWS000000149|Yngve Brodin|morphology|BOLD:AAM5377  
Cricotopus rufiventris[NHRS-BYWS000000183|Yngve Brodin|morphology|BOLD:AAM5377  
Cricotopus rufiventris[NHRS-BYWS000000183|Yngve Brodin|morphology|BOLD:AAM5377  
Cricotopus rufiventris[ZMUO.024698|Lauri Paasivirta|BOLD:AAM5377  
Cricotopus rufiventris[ZMUO.024699|Lauri Paasivirta|BOLD:AAM5377  
Cricotopus rufiventris[NHRS-BYWS000000333|Yngve Brodin|morphology|BOLD:AAM5377  
Cricotopus rufiventris[NHRS-BYWS000000205|Yngve Brodin|morphology|BOLD:AAM5377  
Cricotopus rufiventris[Finmark47|Elisabeth Stur|BOLD:AAM5377  
Cricotopus rufiventris[Finmark15|Elisabeth Stur|BOLD:AAM5377  
Cricotopus rufiventris[Finmark60|Elisabeth Stur|BOLD:AAM5377  
Cricotopus rufiventris[Finmark24|Elisabeth Stur|BOLD:AAM5377  
Cricotopus rufiventris[BIOUG15761-A09|Kate Perez|BIN Taxonomy Match|BOLD:AAM5377  
Cricotopus rufiventris[BIOUG15593-D05|Kate Perez|BIN Taxonomy Match|BOLD:AAM5377  
Cricotopus rufiventris[BIOUG16477-H07|Kate Perez|BIN Taxonomy Match|BOLD:AAM5377  
Cricotopus rufiventris[BIOUG15795-B10|Kate Perez|BIN Taxonomy Match|BOLD:AAM5377  
Cricotopus rufiventris[BIOUG15966-F03|Kate Perez|BIN Taxonomy Match|BOLD:AAM5377  
Cricotopus rufiventris[CH-OSF37|Elisabeth Stur|BOLD:AAM5377  
Cricotopus rufiventris[BIOUG15952-B10|Elisabeth Stur|morphology|BOLD:AAM5377  
Cricotopus rufiventris[BIOUG15953-D03|Elisabeth Stur|morphology|BOLD:AAM5377  
Cricotopus rufiventris[BIOUG16479-D11|Kate Perez|BIN Taxonomy Match|BOLD:AAM5377  
Cricotopus rufiventris[BIOUG16479-H09|Kate Perez|BIN Taxonomy Match|BOLD:AAM5377  
Cricotopus rufiventris[BIOUG16329-C08|Kate Perez|BIN Taxonomy Match|BOLD:AAM5377  
Cricotopus rufiventris[BIOUG16328-H11|Kate Perez|BIN Taxonomy Match|BOLD:AAM5377  
Cricotopus rufiventris[Finmark851|Elisabeth Stur|BOLD:AAM5377  
Cricotopus rufiventris[BIOUG42670-A03|Kate Perez|BIN Taxonomy Match below Phylum (Jun 2019)...)  
Cricotopus rufiventris[BIOUG42756-A04|Kate Perez|BIN Taxonomy Match below Phylum (Jun 2019)...)  
Cricotopus rufiventris[BIOUG42763-H04|Kate Perez|BIN Taxonomy Match below Phylum (Jun 2019)...)  
Cricotopus rufiventris[BIOUG42677-H04|Kate Perez|BIN Taxonomy Match below Phylum (Jun 2019)...)  
Cricotopus rufiventris[ZSM-DIP-33144-F03|Caroline Chimeno|BIN Taxonomy Match (Jan 2022)|BOL...  
Cricotopus rufiventris[BIOUG17136-B11|Kate Perez|BIN Taxonomy Match|BOLD:AAM5377  
Cricotopus rufiventris[BIOUG17114-B01|Kate Perez|BIN Taxonomy Match|BOLD:AAM5377  
Cricotopus rufiventris[ZSM-DIP-33144-G05|Caroline Chimeno|BIN Taxonomy Match (Jan 2022)|BOL...  
Cricotopus rufiventris[BIOUG16480-G12|Kate Perez|BIN Taxonomy Match|BOLD:AAM5377  
Cricotopus rufiventris[BIOUG16297-C02|Kate Perez|BIN Taxonomy Match|BOLD:AAM5377  
Cricotopus rufiventris[BIOUG16435-C01|Kate Perez|BIN Taxonomy Match|BOLD:AAM5377  
Cricotopus rufiventris[BIOUG08217-E11|Kate Perez|BIN Taxonomy Match|BOLD:AAM5377  
Cricotopus rufiventris[BIOUG08254-H06|Kate Perez|BIN Taxonomy Match|BOLD:AAM5377  
Cricotopus rufiventris[BIOUG16527-D12|Kate Perez|BIN Taxonomy Match|BOLD:AAM5377  
Cricotopus rufiventris[BIOUG16529-B07|Kate Perez|BIN Taxonomy Match|BOLD:AAM5377  
Cricotopus rufiventris[BIOUG15563-G04|Kate Perez|BIN Taxonomy Match|BOLD:AAM5377  
Cricotopus rufiventris[BIOUG17094-F10|Kate Perez|BIN Taxonomy Match|BOLD:AAM5377  
Cricotopus rufiventris[BIOUG17119-H09|Kate Perez|BIN Taxonomy Match|BOLD:AAM5377  
Cricotopus rufiventris[BIOUG16996-C02|Kate Perez|BIN Taxonomy Match|BOLD:AAM5377  
Cricotopus rufiventris[BIOUG16477-B02|Kate Perez|BIN Taxonomy Match|BOLD:AAM5377  
Cricotopus rufiventris[BIOUG17119-B02|Kate Perez|BIN Taxonomy Match|BOLD:AAM5377  
Cricotopus rufiventris[BIOUG16480-A03|Kate Perez|BIN Taxonomy Match|BOLD:AAM5377  
Cricotopus rufiventris[BIOUG16261-C10|Kate Perez|BIN Taxonomy Match|BOLD:AAM5377  
Cricotopus rufiventris[BIOUG16333-H02|Kate Perez|BIN Taxonomy Match|BOLD:AAM5377  
Cricotopus rufiventris[BIOUG05269-A06|Kate Perez|BIN Taxonomy Match|BOLD:AAM5377  
Cricotopus rufiventris[BIOUG16328-B11|Kate Perez|BIN Taxonomy Match|BOLD:AAM5377  
Cricotopus rufiventris[BIOUG16330-F07|Kate Perez|BIN Taxonomy Match|BOLD:AAM5377  
Cricotopus rufiventris[BIOUG16299-H02|Kate Perez|BIN Taxonomy Match|BOLD:AAM5377  
Cricotopus rufiventris[BIOUG16551-E12|Kate Perez|BIN Taxonomy Match|BOLD:AAM5377  
Cricotopus rufiventris[BIOUG16555-G09|Kate Perez|BIN Taxonomy Match|BOLD:AAM5377  
Cricotopus rufiventris[BIOUG16258-F05|Kate Perez|BIN Taxonomy Match|BOLD:AAM5377  
Cricotopus rufiventris[BIOUG16551-E07|Kate Perez|BIN Taxonomy Match|BOLD:AAM5377  
Cricotopus rufiventris[BIOUG16477-C05|Kate Perez|BIN Taxonomy Match|BOLD:AAM5377  
Cricotopus rufiventris[BIOUG16328-D10|Kate Perez|BIN Taxonomy Match|BOLD:AAM5377  
Cricotopus rufiventris[BIOUG16434-A07|Kate Perez|BIN Taxonomy Match|BOLD:AAM5377  
Cricotopus rufiventris[BIOUG16299-B07|Kate Perez|BIN Taxonomy Match|BOLD:AAM5377  
Cricotopus rufiventris[BIOUG15719-G09|Kate Perez|BIN Taxonomy Match|BOLD:AAM5377  
Cricotopus rufiventris[BIOUG16433-B10|Kate Perez|BIN Taxonomy Match|BOLD:AAM5377  
Cricotopus rufiventris[BIOUG16431-H10|Kate Perez|BIN Taxonomy Match|BOLD:AAM5377  
Cricotopus rufiventris[BIOUG16480-E02|Kate Perez|BIN Taxonomy Match|BOLD:AAM5377  
Cricotopus rufiventris[BIOUG16297-H05|Kate Perez|BIN Taxonomy Match|BOLD:AAM5377  
Cricotopus rufiventris[BIOUG16436-H01|Kate Perez|BIN Taxonomy Match|BOLD:AAM5377  
Cricotopus rufiventris[BIOUG16299-E12|Kate Perez|BIN Taxonomy Match|BOLD:AAM5377  
Cricotopus rufiventris[BIOUG16477-C09|Kate Perez|BIN Taxonomy Match|BOLD:AAM5377  
Cricotopus rufiventris[BIOUG16330-F04|Kate Perez|BIN Taxonomy Match|BOLD:AAM5377  
Cricotopus rufiventris[BIOUG16259-A11|Kate Perez|BIN Taxonomy Match|BOLD:AAM5377  
Cricotopus rufiventris[BIOUG16332-H09|Kate Perez|BIN Taxonomy Match|BOLD:AAM5377  
Cricotopus rufiventris[BIOUG16299-B05|Kate Perez|BIN Taxonomy Match|BOLD:AAM5377  
Cricotopus rufiventris[BIOUG15593-B08|Kate Perez|BIN Taxonomy Match|BOLD:AAM5377  
Cricotopus rufiventris[BIOUG16333-G08|Kate Perez|BIN Taxonomy Match|BOLD:AAM5377  
Cricotopus rufiventris[BIOUG16333-A07|Kate Perez|BIN Taxonomy Match|BOLD:AAM5377  
Cricotopus rufiventris[BIOUG16257-H09|Kate Perez|BIN Taxonomy Match|BOLD:AAM5377  
Cricotopus rufiventris[BIOUG16297-A07|Kate Perez|BIN Taxonomy Match|BOLD:AAM5377  
Cricotopus rufiventris[BIOUG16555-H04|Kate Perez|BIN Taxonomy Match|BOLD:AAM5377  
Cricotopus rufiventris[BIOUG15764-G09|Kate Perez|BIN Taxonomy Match|BOLD:AAM5377  
Cricotopus rufiventris[BIOUG16433-E08|Kate Perez|BIN Taxonomy Match|BOLD:AAM5377  
Cricotopus rufiventris[BIOUG16329-C03|Kate Perez|BIN Taxonomy Match|BOLD:AAM5377  
Cricotopus rufiventris[BIOUG15762-H06|Kate Perez|BIN Taxonomy Match|BOLD:AAM5377  
Cricotopus rufiventris[BIOUG16329-B08|Kate Perez|BIN Taxonomy Match|BOLD:AAM5377  
Cricotopus rufiventris[BIOUG16329-F04|Kate Perez|BIN Taxonomy Match|BOLD:AAM5377  
Cricotopus rufiventris[BIOUG16298-F12|Kate Perez|BIN Taxonomy Match|BOLD:AAM5377  
Cricotopus rufiventris[BIOUG16298-B03|Kate Perez|BIN Taxonomy Match|BOLD:AAM5377





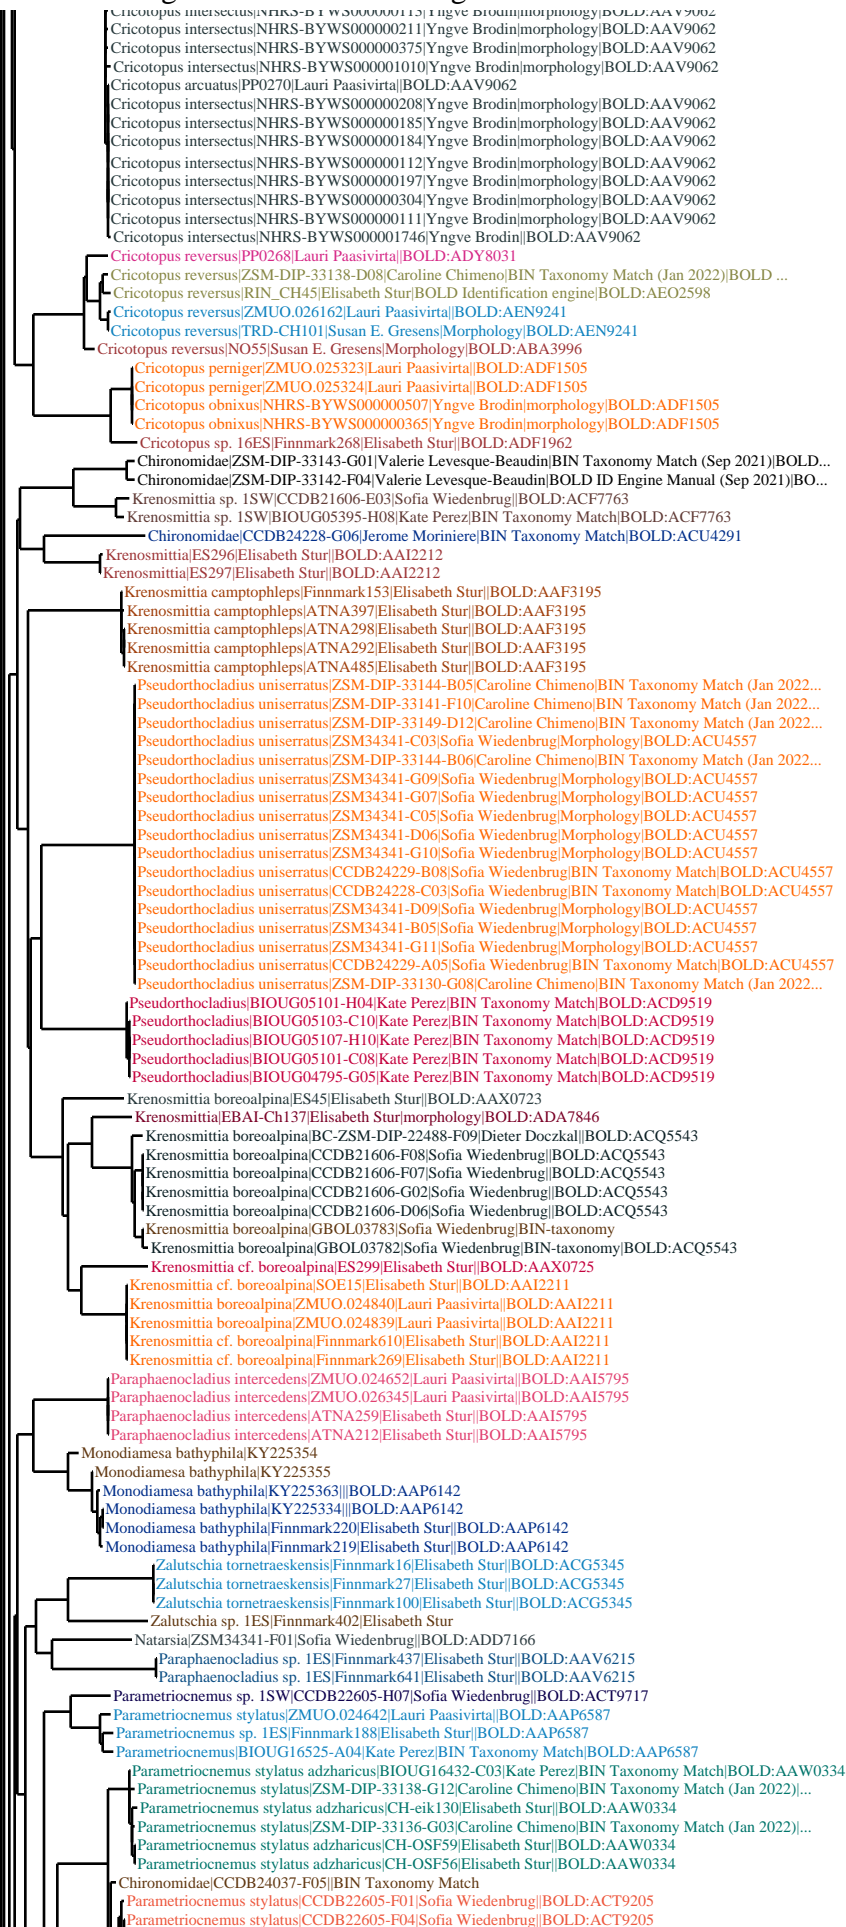

Chironomidae|CCDB24037-F05|BIN Taxonomy Match  
Parametrioecnemus stylatus|CCDB22605-F01|Sofia Wiedenbrug|BOLD:ACT9205  
Parametrioecnemus stylatus|CCDB22605-F04|Sofia Wiedenbrug|BOLD:ACT9205  
Parametrioecnemus stylatus|ZSM-DIP-33134-B11|Caroline Chimento|BIN Taxonomy Match (Jan 2022)|...  
Parametrioecnemus stylatus|ZMUO.024643|Lauri Paasivirta|BOLD:ADA7271  
Parametrioecnemus stylatus|ZMUO.025928|Lauri Paasivirta|BOLD:ADA7271  
Parametrioecnemus stylatus|ZSM-DIP-33137-D03|Caroline Chimento|BIN Taxonomy Match (Jan 2022)|...  
Parametrioecnemus stylatus adzhariensis|TRD-CH402|Elisabeth Stur|morphology|BOLD:ACT9205  
Parametrioecnemus stylatus adzhariensis|CH-OSF122|Elisabeth Stur|BOLD:ACT9205  
Parametrioecnemus stylatus|CCDB21605-D09|Sofia Wiedenbrug|BOLD:AAI2687  
Parametrioecnemus stylatus|ZSM34341-C06|Sofia Wiedenbrug|Morphology  
Parametrioecnemus stylatus|BC-ZSM-DIP-22488-F07|Dieter Doczkal|BOLD:AAI2687  
Parametrioecnemus stylatus|BC-ZSM-DIP-22488-G10|Dieter Doczkal|BOLD:AAI2687  
Parametrioecnemus stylatus|CCDB24228-C01|Sofia Wiedenbrug|BIN Taxonomy Match|BOLD:AAI2687  
Parametrioecnemus stylatus|ZSM34341-F04|Sofia Wiedenbrug|BIN-taxonomy|BOLD:AAI2687  
Parametrioecnemus stylatus|CCDB24037-G03|Sofia Wiedenbrug|BIN Taxonomy Match|BOLD:AAI2687  
Parametrioecnemus stylatus|CCDB24037-F06|Sofia Wiedenbrug|BIN Taxonomy Match|BOLD:AAI2687  
Parametrioecnemus stylatus adzhariensis|ES285|Elisabeth Stur|BOLD:AAI2687  
Parametrioecnemus|CCDB24039-F10|Sofia Wiedenbrug|BIN Taxonomy Match|BOLD:ACU4174  
Parametrioecnemus|CCDB24038-H08|Sofia Wiedenbrug|BIN Taxonomy Match|BOLD:ACU4173  
Parametrioecnemus sp. 2SW|BC-ZSM-DIP-22488-C09|Dieter Doczkal|BOLD:ACT5782  
Parametrioecnemus sp. 2SW|CCDB21606-A12|Sofia Wiedenbrug|BOLD:ACT5782  
Parametrioecnemus sp. 2SW|ZSM34342-G01|Sofia Wiedenbrug|Morphology|BOLD:ACT5782  
Parametrioecnemus sp. 2SW|CCDB24039-E03|Sofia Wiedenbrug|BOLD:ACT5782  
Parametrioecnemus stylatus|SOE185|Elisabeth Stur|BOLD:AAB4494  
Parametrioecnemus stylatus|ES14|Elisabeth Stur|BOLD:AAB4494  
Parametrioecnemus stylatus|SOE49|Elisabeth Stur|BOLD:AAB4494  
Parametrioecnemus stylatus|SOE280|Elisabeth Stur|BOLD:AAB4494  
Parametrioecnemus stylatus|SOE460|Elisabeth Stur|BOLD:AAB4494  
Parametrioecnemus stylatus|SOE464|Elisabeth Stur|BOLD:AAB4494  
Parametrioecnemus sp.|CCDB21606-E04|Sofia Wiedenbrug|BOLD:AAB4494  
Parametrioecnemus stylatus|SOE418|Elisabeth Stur|BOLD:AAB4494  
Parametrioecnemus stylatus|ATNA221|Elisabeth Stur|BOLD:AAB4494  
Parametrioecnemus stylatus|SOE286|Elisabeth Stur|BOLD:AAB4494  
Parametrioecnemus stylatus|ES22|Elisabeth Stur|BOLD:AAB4494  
Parametrioecnemus stylatus|SOE275|Elisabeth Stur|BOLD:AAB4494  
Parametrioecnemus stylatus|SOE104|BOLD:AAB4494  
Parametrioecnemus stylatus|SOE285|Elisabeth Stur|BOLD:AAB4494  
Parametrioecnemus stylatus|SOE145|Elisabeth Stur|BOLD:AAB4494  
Parametrioecnemus stylatus|SOE183|Elisabeth Stur|BOLD:AAB4494  
Parametrioecnemus stylatus|SOE103|BOLD:AAB4494  
Parametrioecnemus stylatus|SOE465|Elisabeth Stur|BOLD:AAB4494  
Parametrioecnemus stylatus|SOE468|Elisabeth Stur|BOLD:AAB4494  
Parametrioecnemus stylatus|ATNA196|Elisabeth Stur|BOLD:AAB4494  
Parametrioecnemus stylatus|SOE154|Elisabeth Stur|BOLD:AAB4494  
Parametrioecnemus stylatus|SOE435|Elisabeth Stur|BOLD:AAB4494  
Parametrioecnemus stylatus|SOE106|BOLD:AAB4494  
Parametrioecnemus stylatus|SOE102|BOLD:AAB4494  
Parametrioecnemus lundbeckii|Finmark880|G. A. Halvorsen|BOLD:AAP6586  
Parametrioecnemus lundbeckii|EBAI-Ch268|Elisabeth Stur|morphology|BOLD:AAP6586  
Parametrioecnemus lundbeckii|Finmark164|Elisabeth Stur|BOLD:AAP6586  
Parametrioecnemus lundbeckii|Finmark599|Elisabeth Stur|BOLD:AAP6586  
Paraphaenocladus|CCDB24037-A08|Sofia Wiedenbrug|BIN Taxonomy Match|BOLD:ACU4854  
Bryophaenocladus subvernalis|SOE138|Torbjorn Ekrem|BOLD:AAI8503  
Bryophaenocladus subvernalis|SOE141|Torbjorn Ekrem|BOLD:AAI8503  
Apsectrotanytus trifascipennis|CCDB22605-E01|Sofia Wiedenbrug|BOLD:ACD1957  
Apsectrotanytus trifascipennis|TRD-CH285|Elisabeth Stur|BOLD:ACD1957  
Apsectrotanytus trifascipennis|TRD-CH284|Elisabeth Stur|BOLD:ACD1957  
Apsectrotanytus trifascipennis|TRD-CH219|Elisabeth Stur|BOLD:ACD1957  
Apsectrotanytus trifascipennis|BIOUG43948-E12|Kate Perez|BIN Taxonomy Match below Phylum (Jan ...  
Apsectrotanytus trifascipennis|ZMUO.024788|Lauri Paasivirta|BOLD:ACD1957  
Apsectrotanytus trifascipennis|ZMUO.024789|Lauri Paasivirta|BOLD:ACD1957  
Apsectrotanytus trifascipennis|TRD-CH375|Elisabeth Stur|morphology|BOLD:ACD1957  
Apsectrotanytus trifascipennis|TRD-CH220|Elisabeth Stur|BOLD:ACD1957  
Apsectrotanytus trifascipennis|Finmark746|Elisabeth Stur|BOLD:ACD1957  
Paraphaenocladus|CCDB24183-D11|Sofia Wiedenbrug|Morphology|BOLD:ACF8295  
Paraphaenocladus|BIOUG05149-E12|Kate Perez|BIN Taxonomy Match|BOLD:ACF8295  
Paraphaenocladus pseudirritus|ZSM-DIP-33140-D11|Valerie Levesque-Beaudin|BIN Taxonomy Match (...  
Paraphaenocladus pseudirritus|ZSM-DIP-33140-C09|Valerie Levesque-Beaudin|BIN Taxonomy Match (...  
Paraphaenocladus pseudirritus|ZSM-DIP-33136-F03|Valerie Levesque-Beaudin|BIN Taxonomy Match (...  
Paraphaenocladus pseudirritus|ZSM-DIP-33136-E08|Valerie Levesque-Beaudin|BOLD ID Engine Manual ...  
Paraphaenocladus pseudirritus|ZSM-DIP-33140-E02|Valerie Levesque-Beaudin|BIN Taxonomy Match (...  
Paraphaenocladus pseudirritus|TRD-CH61|Elisabeth Stur|BOLD:ACK3521  
Paraphaenocladus pseudirritus|ZSM-DIP-33137-C01|Caroline Chimento|BIN Taxonomy Match (Jan 2022)|...  
Paraphaenocladus pseudirritus|ZMUO.024680|Lauri Paasivirta|BOLD:ACK3521  
Paraphaenocladus pseudirritus|ZMUO.024681|Lauri Paasivirta|BOLD:ACK3521  
Paraphaenocladus pseudirritus|TRD-CH18|Elisabeth Stur|BOLD:ACK3521  
Paraphaenocladus pseudirritus|ATNA202|Elisabeth Stur|BOLD:AAC4195  
Paraphaenocladus pseudirritus|ATNA265|Elisabeth Stur|BOLD:AAC4195  
Paraphaenocladus pseudirritus|ZMUO.026338|Lauri Paasivirta|BOLD:AAC4195  
Paraphaenocladus pseudirritus|ATNA390|Elisabeth Stur|BOLD:AAC4195  
Paraphaenocladus pseudirritus|BIOUG15463-G07|Kate Perez|BIN Taxonomy Match|BOLD:AAC4195  
Paraphaenocladus|24502-H01|Kate Perez|BIN Taxonomy Match|BOLD:ACJ1112  
Paraphaenocladus|24372-D01|Kate Perez|BIN Taxonomy Match|BOLD:ACJ1112  
Paraphaenocladus pseudirritus|CCDB21605-C06|Sofia Wiedenbrug  
Paraphaenocladus pseudirritus|CCDB21606-G09|Sofia Wiedenbrug|BOLD:AAC4194  
Paraphaenocladus pseudirritus|CCDB21605-C04|Sofia Wiedenbrug|BOLD:AAC4194  
Paraphaenocladus pseudirritus|ZSM34341-C01|Sofia Wiedenbrug|Morphology|BOLD:AAC4194  
Paraphaenocladus pseudirritus|CCDB24228-C02|Jerome Moriniere|BIN Taxonomy Match|BOLD:AAC4194  
Paraphaenocladus pseudirritus|CCDB21605-C05|Sofia Wiedenbrug|BOLD:AAC4194  
Paraphaenocladus pseudirritus|BIOUG05945-B04|Kate Perez|BIN Taxonomy Match|BOLD:AAC4194  
Paraphaenocladus pseudirritus|SOE439|Elisabeth Stur  
Paraphaenocladus pseudirritus|CH-OSF186|Elisabeth Stur|BOLD:AAC4194  
Paraphaenocladus pseudirritus|SOE340|Elisabeth Stur|BOLD:AAC4194  
Paraphaenocladus pseudirritus|SOE153|Elisabeth Stur|BOLD:AAC4194  
Paraphaenocladus pseudirritus|ZSM-DIP-33134-A05|Caroline Chimento|BIN Taxonomy Match (Jan 2022)|...  
Paraphaenocladus pseudirritus|ZSM-DIP-33170-H10|Caroline Chimento|BIN Taxonomy Match (Jan 2022)|...  
Paraphaenocladus pseudirritus|BIOUG05944-D08|Kate Perez|BIN Taxonomy Match|BOLD:AAC4194  
Paraphaenocladus pseudirritus|SOE332|Elisabeth Stur|BOLD:AAC4194  
Paraphaenocladus pseudirritus|SOE293|Elisabeth Stur|BOLD:AAC4194  
Paraphaenocladus pseudirritus|SOE473|Elisabeth Stur|BOLD:AAC4194  
Paraphaenocladus pseudirritus|SOE299|Elisabeth Stur|BOLD:AAC4194  
Paraphaenocladus pseudirritus|SOE188|Elisabeth Stur|BOLD:AAC4194

Paraphaenocladus pseudirritus|SOE473|Elisabeth Stur|BOLD: AAC4194  
 Paraphaenocladus pseudirritus|SOE299|Elisabeth Stur|BOLD: AAC4194  
 Paraphaenocladus pseudirritus|SOE188|Elisabeth Stur|BOLD: AAC4194  
 Paraphaenocladus pseudirritus|SOE463|Elisabeth Stur|BOLD: AAC4194  
 Chironomidae|ZSM-DIP-33136-B12|Valerie Levesque-Beaudin|BIN Taxonomy Match (Sep 2021)|BOLD...  
 Chironomidae|ZSM-DIP-33136-B11|Valerie Levesque-Beaudin|BOLD ID Engine Manual (Sep 2021)|BO...  
 Chironomidae|ZSM-DIP-33138-H01|Valerie Levesque-Beaudin|BIN Taxonomy Match (Sep 2021)|BOLD...  
 Chironomidae|ZSM-DIP-33136-C05|Valerie Levesque-Beaudin|BIN Taxonomy Match (Sep 2021)|BOLD...  
 Chironomidae|ZSM-DIP-33149-C01|Valerie Levesque-Beaudin|BIN Taxonomy Match (Sep 2021)|BOLD...  
 Chironomidae|ZSM-DIP-33140-D06|Valerie Levesque-Beaudin|BIN Taxonomy Match (Sep 2021)|BOLD...  
 Chironomidae|ZSM-DIP-33139-E01|Valerie Levesque-Beaudin|BIN Taxonomy Match (Sep 2021)|BOLD...  
 Chironomidae|ZSM-DIP-33136-E06|Valerie Levesque-Beaudin|BIN Taxonomy Match (Sep 2021)|BOLD...  
 Chironomidae|ZSM-DIP-33136-E05|Valerie Levesque-Beaudin|BIN Taxonomy Match (Sep 2021)|BOLD...  
 Chironomidae|ZSM-DIP-33133-H11|Valerie Levesque-Beaudin|BIN Taxonomy Match (Sep 2021)|BOLD...  
 Paraphaenocladus|CCDB24038-B03|Sofia Wiedenbrug|BIN Taxonomy Match|BOLD: ACU4391  
 Paraphaenocladus irritus|ZSM-DIP-33133-H07|Caroline Chimenon|BIN Taxonomy Match (Jan 2022)|...  
 Paraphaenocladus irritus|ATNA297|Elisabeth Stur|BOLD: AAF7259  
 Paraphaenocladus irritus|ATNA201|Elisabeth Stur|BOLD: AAF7259  
 Paraphaenocladus irritus|SOE446|Torbjorn Ekrem|BOLD: AAF7259  
 Paraphaenocladus sp. 3ES|Finmark576|Elisabeth Stur|BOLD: AAM5383  
 Paraphaenocladus sp. 3ES|Finmark196|Elisabeth Stur|BOLD: AAM5383  
 Paraphaenocladus sp. 3ES|Finmark517|Elisabeth Stur|BOLD: AAM5383  
 Paraphaenocladus sp. 3ES|Finmark575|Elisabeth Stur|BOLD: AAM5383  
 Paraphaenocladus sp. 3ES|BIOUG04437-E08|Kate Perez|BIN Taxonomy Match|BOLD: AAM5383  
 Paraphaenocladus sp. 3ES|BIOUG04437-D05|Kate Perez|BIN Taxonomy Match|BOLD: AAM5383  
 Paraphaenocladus sp. 3ES|Finmark691|Elisabeth Stur|BOLD: AAM5383  
 Paraphaenocladus sp. 3ES|Finmark204|Elisabeth Stur|BOLD: AAM5383  
 Paraphaenocladus sp. 3ES|ATNA511|Elisabeth Stur|BOLD: AAM5383  
 Paraphaenocladus sp. 3ES|Finmark571|Elisabeth Stur|BOLD: AAM5383  
 Propiloscerus saetheri|Finmark749|G. A. Halvorsen|BOLD: AAM7072  
 Propiloscerus saetheri|Finmark747|G. A. Halvorsen|BOLD: AAM7072  
 Propiloscerus saetheri|Finmark45|Elisabeth Stur|BOLD: AAM7072  
 Diplocladius cultriger|ZMUO.024305|Lauri Paasivirta|BOLD: ADA5683  
 Chironomidae|BIOUG04261-E04|Kate Perez|BIN Taxonomy Match|BOLD: ACC1683  
 Diplocladius cultriger|TRD-CH395|Elisabeth Stur|morphology|BOLD: AAM5628  
 Diplocladius cultriger|TRD-CH396|Elisabeth Stur|morphology|BOLD: AAM5628  
 Diplocladius cultriger|CH-OSF02|Elisabeth Stur|BOLD: AAM5628  
 Diplocladius cultriger|ATNA484|Elisabeth Stur|BOLD: AAM5628  
 Diplocladius cultriger|ZMUO.025924|Lauri Paasivirta|BOLD: AAM7068  
 Diplocladius cultriger|Finmark18|Elisabeth Stur|BOLD: AAM7068  
 Diplocladius cultriger|ZMUO.025925|Lauri Paasivirta|BOLD: AAM7068  
 Diplocladius cultriger|Finmark480|Elisabeth Stur|BOLD: AAM7068  
 Diplocladius|Finmark305|Elisabeth Stur|BOLD: AAV1758  
 Diplocladius cultriger|ZMUO.026323|Lauri Paasivirta|BOLD: AAV1758  
 Diplocladius|Finmark303|Elisabeth Stur|BOLD: AAV1758  
 Macropelopia nebulosa|KY225353  
 Macropelopia fittkau|ES71|Elisabeth Stur|BOLD: AAX3573  
 Macropelopia johnseni|ZSM-DIP-33141-F12|Caroline Chimenon|BIN Taxonomy Match (Jan 2022)|BOLD...  
 Macropelopia nebulosa|TRD-CH323|Elisabeth Stur|BOLD: AAX3566  
 Macropelopia nebulosa|ZMUO.024831|Lauri Paasivirta|BOLD: AAX3566  
 Macropelopia nebulosa|TRD-CH183|Elisabeth Stur|BOLD: AAX3566  
 Macropelopia nebulosa|TRD-CH156|Elisabeth Stur|morphology|BOLD: AAX3566  
 Macropelopia nebulosa|TRD-CH170|Elisabeth Stur|BOLD: AAX3566  
 Macropelopia|BIOUG43946-H02|Kate Perez|BIN Taxonomy Match below Phylum (Jan 2019)|BOLD: A...  
 Macropelopia nebulosa|TRD-CH180|Elisabeth Stur|BOLD: AAX3566  
 Macropelopia nebulosa|NO25|Elisabeth Stur|BOLD: AAX3566  
 Macropelopia nebulosa|TRD-CH373|Elisabeth Stur|morphology|BOLD: AAX3566  
 Macropelopia|BIOUG43946-E07|Kate Perez|BIN Taxonomy Match below Phylum (Jan 2019)|BOLD: A...  
 Macropelopia nebulosa|ZMUO.024832|Lauri Paasivirta|BOLD: AAX3566  
 Macropelopia nebulosa|TRD-CH374|Elisabeth Stur|morphology|BOLD: AAX3566  
 Macropelopia nebulosa|TRD-CH134|Elisabeth Stur|morphology|BOLD: AAX3566  
 Macropelopia nebulosa|TRD-CH109|Elisabeth Stur|BOLD: AAX3566  
 Macropelopia nebulosa|TRD-CH108|Elisabeth Stur|BOLD: AAX3566  
 Natarsia punctata|BIOUG44442-H02|Kate Perez|BIN Taxonomy Match below Phylum (Mar 2019)|BOLD...  
 Natarsia punctata|CH-OSF35|Torbjorn Ekrem|BOLD: ABU9441  
 Natarsia punctata|ATNA564|Elisabeth Stur|BOLD: AEN3605  
 Natarsia punctata|ATNA576|Elisabeth Stur|morphology|BOLD: AEN3605  
 Natarsia punctata|ATNA575|Elisabeth Stur|morphology|BOLD: AEN3605  
 Natarsia punctata|ZSM-DIP-33143-D06|Caroline Chimenon|BIN Taxonomy Match (Jan 2022)|BOLD: ...  
 Natarsia punctata|TRD-CH348|Elisabeth Stur|morphology|BOLD: AAV2697  
 Natarsia punctata|TRD-CH9|Elisabeth Stur|BOLD: AAV2697  
 Natarsia punctata|NO 93|Elisabeth Stur|BOLD: AAV2697  
 Natarsia punctata|TRD-CH349|Elisabeth Stur|morphology|BOLD: AAV2697  
 Natarsia punctata|NHRS-BYWS00000992|Yngve Brodin|morphology|BOLD: AAV2697  
 Natarsia punctata|CCDB24183-E06|Sofia Wiedenbrug|Morphology|BOLD: AAV2697  
 Natarsia punctata|NHRS-BYWS00000985|Yngve Brodin|morphology|BOLD: AAV2697  
 Natarsia punctata|NHRS-BYWS00000189|Yngve Brodin|morphology|BOLD: AAV2697  
 Natarsia punctata|ZMUO.024728|Lauri Paasivirta|BOLD: AAV2697  
 Natarsia punctata|ZSM-DIP-33141-G10|Caroline Chimenon|BIN Taxonomy Match (Jan 2022)|BOLD: ...  
 Natarsia punctata|CCDB24183-G05|Sofia Wiedenbrug|BIN-taxonomy|BOLD: AAV2697  
 Natarsia punctata|CCDB24183-F01|Sofia Wiedenbrug|BIN-taxonomy|BOLD: AAV2697  
 Natarsia punctata|CCDB24183-E09|Sofia Wiedenbrug|BIN-taxonomy|BOLD: AAV2697  
 Natarsia punctata|CCDB24183-E08|Sofia Wiedenbrug|BIN-taxonomy|BOLD: AAV2697  
 Natarsia punctata|CCDB24183-E07|Sofia Wiedenbrug|Morphology|BOLD: AAV2697  
 Natarsia punctata|CH-OSF113|Elisabeth Stur|BOLD: AAV2697  
 Natarsia punctata|NHRS-BYWS00000984|Yngve Brodin|morphology|BOLD: AAV2697  
 Natarsia punctata|TRD-CH312|Elisabeth Stur|BOLD: AAV2697  
 Natarsia punctata|ZMUO.024729|Lauri Paasivirta|BOLD: AAV2697  
 Natarsia punctata|TRD-CH71|Elisabeth Stur|BOLD: AAV2697  
 Natarsia punctata|TRD-CH40|Elisabeth Stur|BOLD: AAV2697  
 Natarsia punctata|TRD-CH5|Elisabeth Stur|BOLD: AAV2697  
 Natarsia punctata|RIN\_CH14|Mona Renate Saurseth|BOLD Identification engine|BOLD: AAV2697  
 Natarsia punctata|Finmark417|Torbjorn Ekrem|BOLD: AAV2697  
 Natarsia punctata|NO 91|Elisabeth Stur|BOLD: AAV2697  
 Macropelopia|ZMUO.025895|Lauri Paasivirta|BOLD: AAC1445  
 Macropelopia|ZMUO.025894|Lauri Paasivirta|BOLD: AAC1445  
 Macropelopia notata|SOE172|Elisabeth Stur|BOLD: AAC1445  
 Macropelopia notata|SOE164|Elisabeth Stur|BOLD: AAC1445  
 Macropelopia notata|SOE266|Torbjorn Ekrem|BOLD: AAC1445  
 Macropelopia notata|SOE267|Torbjorn Ekrem|BOLD: AAC1445  
 Macropelopia notata|SOE63|Elisabeth Stur|BOLD: AAC1445  
 Macropelopia notata|SOE64|Torbjorn Ekrem|BOLD: AAC1445  
 Macropelopia notata|SOE65|Torbjorn Ekrem|BOLD: AAC1445

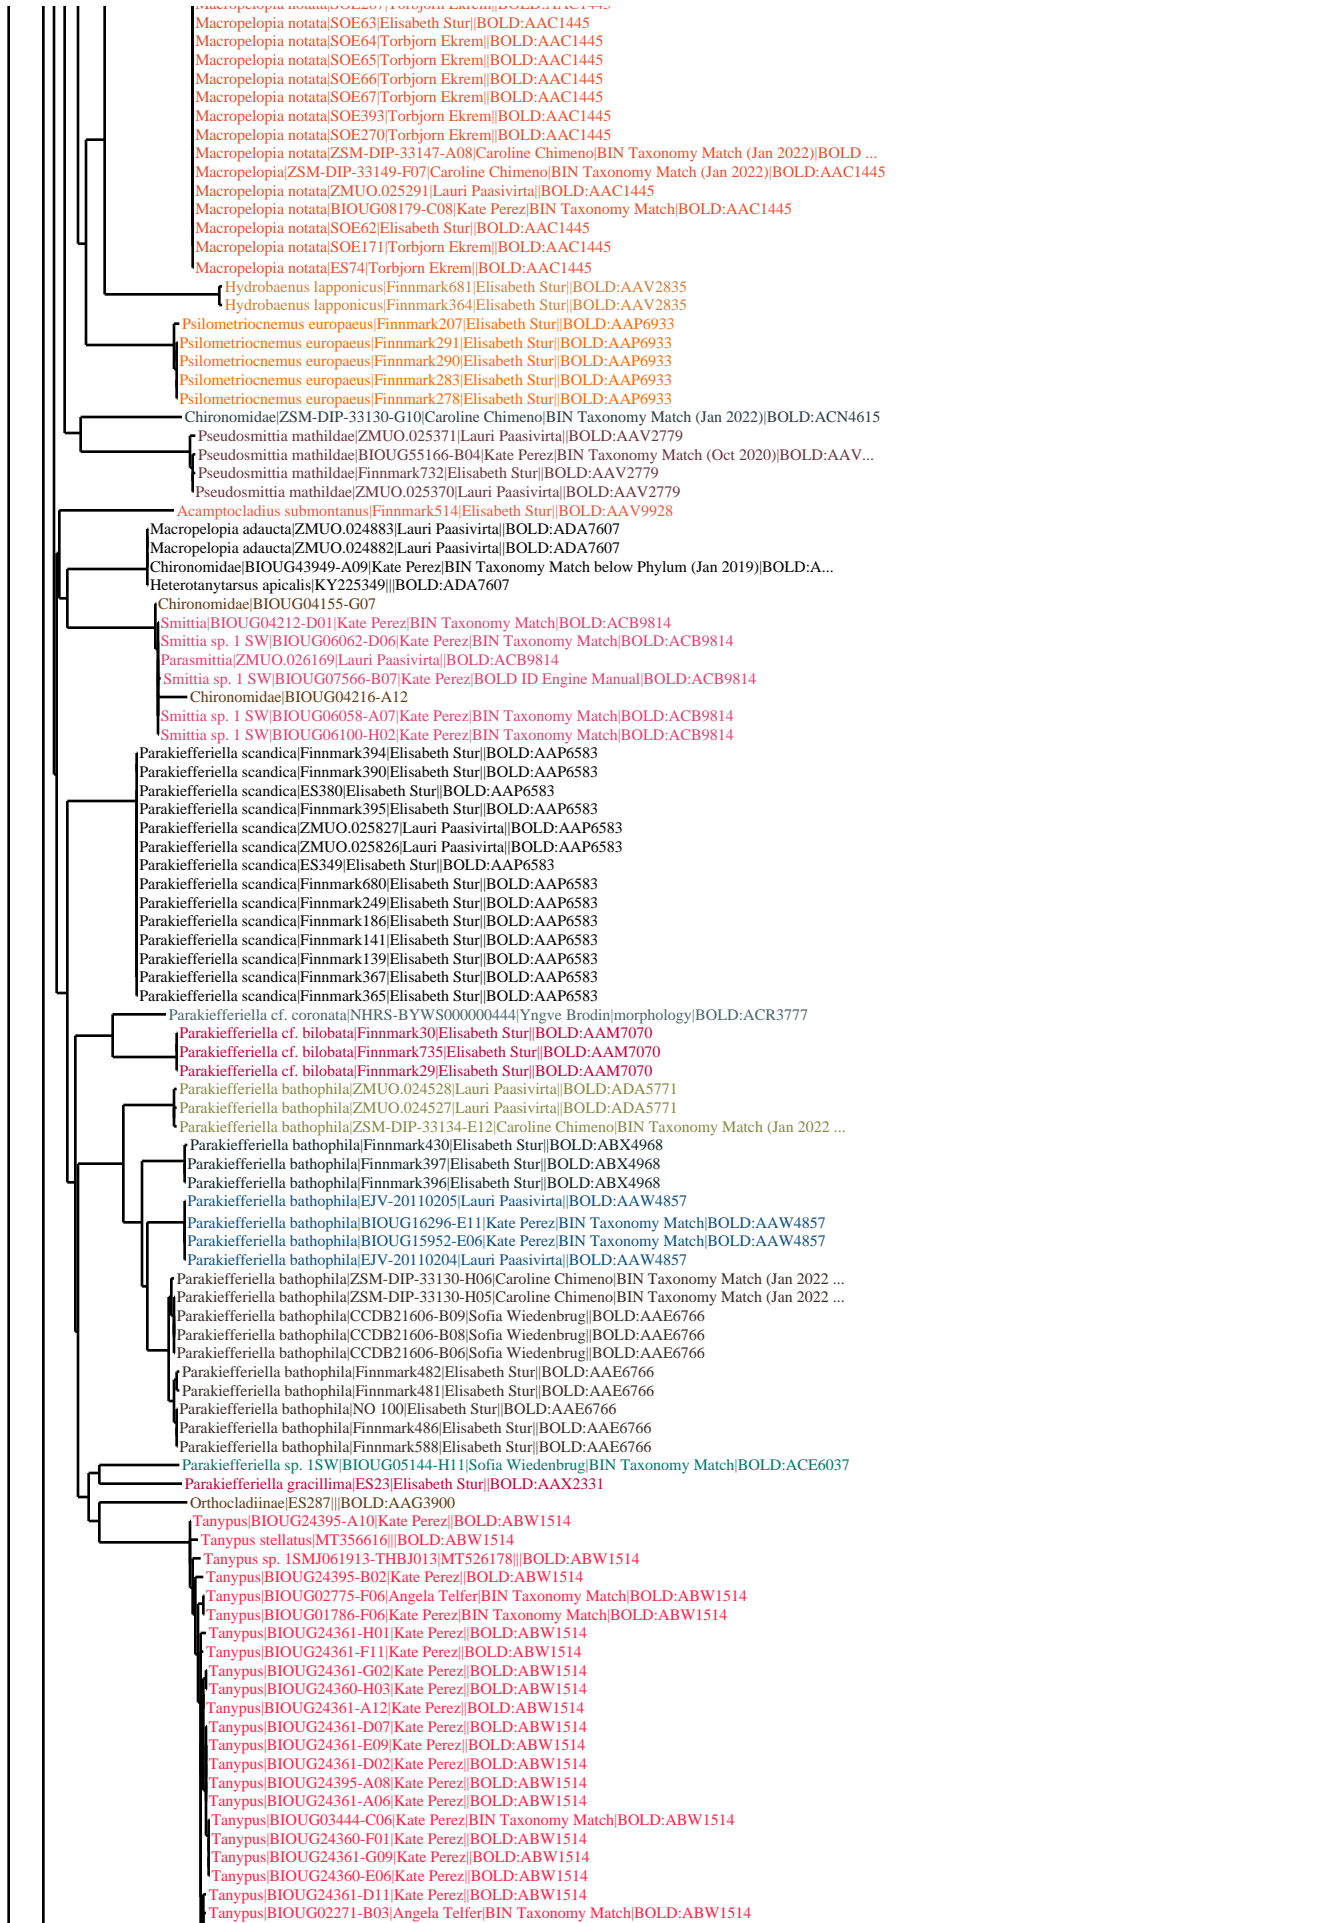

\*Tanypus|BIOUG24360-E06|Kate Perez||BOLD:ABW1514  
 Tanypus|BIOUG24361-D11|Kate Perez||BOLD:ABW1514  
 Tanypus|BIOUG02271-B03|Angela Telfer|BIN Taxonomy Match|BOLD:ABW1514  
 Tanypus stellatus|KP954650||BOLD:ABW1514  
 Tanypus|BIOUG24361-H06|Kate Perez||BOLD:ABW1514  
 Tanypus|BIOUG24360-E07|Kate Perez||BOLD:ABW1514  
 Tanypus|BIOUG24361-E04|Kate Perez||BOLD:ABW1514  
 Tanypus|BIOUG24361-G05|Kate Perez||BOLD:ABW1514  
 Tanypus|BIOUG24395-D02|Kate Perez||BOLD:ABW1514  
 Tanypus|BIOUG24361-H09|Kate Perez||BOLD:ABW1514  
 Tanypus|BIOUG24361-C07|Kate Perez||BOLD:ABW1514  
 Tanypus|BIOUG24361-G04|Kate Perez||BOLD:ABW1514  
 Tanypus|BIOUG24360-F06|Kate Perez||BOLD:ABW1514  
 Tanypus|BIOUG24397-B07|Kate Perez||BOLD:ABW1514  
 Tanypus|BIOUG24395-C07|Kate Perez||BOLD:ABW1514  
 Tanypus|BIOUG24395-F04|Kate Perez||BOLD:ABW1514  
 Tanypus|BIOUG24395-C04|Kate Perez||BOLD:ABW1514  
 Monodiamesa ekmani|ZMUO.026207|Lauri Paasivirta||BOLD:ACI6369  
 Paraccladius|BC-ZSM-DIP-22551-D03|Dieter Doczkal|BIN Taxonomy Match|BOLD:ACU4375  
 Paraccladius|CCDB24038-E01|Jerome Moriniere|BIN Taxonomy Match|BOLD:ACU4375  
 Paraccladius|CCDB22604-D09|Sofia Wiedenbrug||BOLD:ACR9234  
 Paraccladius|CCDB22604-D07|Sofia Wiedenbrug||BOLD:ACR9234  
 Paraccladius|CCDB22604-D06|Sofia Wiedenbrug||BOLD:ACR9234  
 Paraccladius|CCDB22604-C09|Sofia Wiedenbrug||BOLD:ACR9234  
 Paraccladius|CCDB21606-D04|Sofia Wiedenbrug||BOLD:ACR9234  
 Trichotanypus posticalis|ZMUO.025882|Lauri Paasivirta||BOLD:ADF1264  
 Parakiefferiella sp. 2SW|CCDB22605-B01|Sofia Wiedenbrug||BOLD:ACT9741  
 Parakiefferiella sp. 2SW|CCDB22605-B02|Sofia Wiedenbrug||BOLD:ACT9741  
 Lasiodiamesa armata|ZMUO.026337|Lauri Paasivirta||BOLD:ADA9239  
 Lasiodiamesa gracilis|ZMUO.025121|Lauri Paasivirta||BOLD:ADA9239  
 Lasiodiamesa gracilis|ZMUO.025120|Lauri Paasivirta||BOLD:ADA9239  
 Lasiodiamesa sphagnicola|ZMUO.026374|Marko Mutanen||BOLD:AEJ6063  
 Lasiodiamesa sphagnicola|ZSM-DIP-33134-C03|Caroline Chimeno|BIN Taxonomy Match (Jan 2022)|B...  
 Lasiodiamesa nr. sphagnicola|ZMUO.025303|Lauri Paasivirta||BOLD:AEJ6064  
 Lasiodiamesa sphagnicola|ZSM-DIP-33135-C05|Caroline Chimeno|BIN Taxonomy Match (Jan 2022)|B...  
 Lasiodiamesa sphagnicola|ZSM-DIP-33130-E04|Caroline Chimeno|BIN Taxonomy Match (Jan 2022)|B...  
 Lasiodiamesa sphagnicola|ZSM-DIP-33134-C04|Caroline Chimeno|BIN Taxonomy Match (Jan 2022)|B...  
 Lasiodiamesa sphagnicola|ZSM-DIP-33134-C02|Caroline Chimeno|BIN Taxonomy Match (Jan 2022)|B...  
 Lasiodiamesa sphagnicola|ZSM-DIP-33149-A12|Caroline Chimeno|BIN Taxonomy Match (Jan 2022)|B...  
 Lasiodiamesa sphagnicola|ZSM-DIP-33135-C06|Caroline Chimeno|BIN Taxonomy Match (Jan 2022)|B...  
 Lasiodiamesa sphagnicola|Finmark359|Elisabeth Stur||BOLD:AAW9948  
 Pseudodiamesa nivosa|ZMUO.025948|Lauri Paasivirta||BOLD:AAF6936  
 Pseudodiamesa nivosa|ZMUO.025947|Lauri Paasivirta||BOLD:AAF6936  
 Pseudodiamesa nivosa|ZMUO.026047|Lauri Paasivirta||BOLD:AAF6936  
 Pseudodiamesa nivosa|ZMUO.026046|Lauri Paasivirta||BOLD:AAF6936  
 Pseudodiamesa nivosa|ATNA94|Elisabeth Stur||BOLD:AAF6936  
 Pseudodiamesa nivosa|ATNA104|Elisabeth Stur||BOLD:AAF6936  
 Pseudodiamesa nivosa|ATNA61|Elisabeth Stur||BOLD:AAF6936  
 Pseudodiamesa branickii|CH-OSF148|Elisabeth Stur||BOLD:AAD0382  
 Pseudodiamesa branickii|ATNA166|Elisabeth Stur||BOLD:AAD0382  
 Pseudodiamesa branickii|ATNA117|Elisabeth Stur||BOLD:AAD0382  
 Pseudodiamesa branickii|ATNA559|Elisabeth Stur||BOLD:AAD0382  
 Pseudodiamesa branickii|BIOUG17022-D08|Kate Perez|BIN Taxonomy Match|BOLD:AAD0382  
 Pseudodiamesa branickii|ATNA123|Elisabeth Stur||BOLD:AAD0382  
 Pseudodiamesa branickii|ATNA173|Elisabeth Stur||BOLD:AAD0382  
 Pseudodiamesa branickii|ATNA118|Elisabeth Stur||BOLD:AAD0382  
 Pseudodiamesa branickii|ATNA116|Elisabeth Stur||BOLD:AAD0382  
 Pseudodiamesa branickii|BIOUG15087-A06|Kate Perez|BIN Taxonomy Match|BOLD:AAD0382  
 Pseudodiamesa branickii|ATNA105|Elisabeth Stur||BOLD:AAD0382  
 Pseudodiamesa branickii|ATNA95|Elisabeth Stur||BOLD:AAD0382  
 Pseudodiamesa branickii|BC-ZSM-DIP-22488-C02|Sofia Wiedenbrug|Morphology|BOLD:ACX2423  
 Chironomidae|CCDB24037-D01|BIN Taxonomy Match  
 Pseudodiamesa branickii|ZMUO.025862|Lauri Paasivirta||BOLD:AEE1136  
 Pseudodiamesa branickii|Finmark560|Elisabeth Stur||BOLD:AEE1136  
 Pseudodiamesa|EBAI-Ch186|Elisabeth Stur|morphology|BOLD:AAQ3206  
 Pseudodiamesa|EBAI-Ch184|Elisabeth Stur|morphology|BOLD:AAQ3206  
 Pseudodiamesa|EBAI-Ch236|Elisabeth Stur|morphology  
 Pseudodiamesa|EBAI-Ch183|Elisabeth Stur|morphology|BOLD:AAQ3206  
 Pseudodiamesa|EBAI-Ch185|Elisabeth Stur|morphology|BOLD:AAQ3206  
 Pseudodiamesa|EBAI-Ch067|Elisabeth Stur|morphology|BOLD:AAQ3206  
 Pseudodiamesa|EBAI-Ch182|Elisabeth Stur|morphology|BOLD:AAQ3206  
 Pseudodiamesa cf. pertinax|Finmark539|Elisabeth Stur||BOLD:AAQ3206  
 Potthastia gaedii|ZMUO.025151|Lauri Paasivirta||BOLD:ADA6123  
 Potthastia gaedii|ZMUO.025152|Lauri Paasivirta||BOLD:ADA6123  
 Potthastia gaedii|NHRS-BYWS00000439|Yngve Brodin|morphology|BOLD:ADA6123  
 Potthastia gaedii|NHRS-BYWS000001116|Yngve Brodin|morphology|BOLD:ADA6123  
 Potthastia gaedii|NHRS-BYWS000000436|Yngve Brodin|morphology|BOLD:ADA6123  
 Potthastia gaedii|NHRS-BYWS000000397|Yngve Brodin|morphology|BOLD:ADA6123  
 Trichotanypus posticalis|Finmark687|Elisabeth Stur||BOLD:AAE8611  
 Trichotanypus posticalis|ATNA70|Elisabeth Stur||BOLD:AAE8611  
 Trichotanypus posticalis|ATNA69|Elisabeth Stur||BOLD:AAE8611  
 Trichotanypus posticalis|ATNA68|Elisabeth Stur||BOLD:AAE8611  
 Trichotanypus posticalis|ATNA67|Elisabeth Stur||BOLD:AAE8611  
 Cricotopus cf. curtus|TRD-CH406|Elisabeth Stur|morphology|BOLD:AAG1012  
 Cricotopus|BIOUG43949-A08|Kate Perez|BIN Taxonomy Match below Phylum (Jan 2019)|BOLD:AAG...  
 Cricotopus cf. curtus|ATNA376|Elisabeth Stur||BOLD:AAG1012  
 Cricotopus cf. curtus|BIOUG15852-E12|Kate Perez|BIN Taxonomy Match|BOLD:AAG1012  
 Cricotopus cf. curtus|BIOUG16396-B09|Kate Perez|BIN Taxonomy Match|BOLD:AAG1012  
 Cricotopus cf. curtus|BIOUG16476-G06|Kate Perez|BIN Taxonomy Match|BOLD:AAG1012  
 Cricotopus cf. curtus|BIOUG15948-B02|Kate Perez|BIN Taxonomy Match|BOLD:AAG1012  
 Cricotopus cf. curtus|BIOUG16480-E08|Kate Perez|BIN Taxonomy Match|BOLD:AAG1012  
 Cricotopus cf. curtus|BIOUG16328-F02|Kate Perez|BIN Taxonomy Match|BOLD:AAG1012  
 Cricotopus cf. curtus|BIOUG16436-B01|Kate Perez|BIN Taxonomy Match|BOLD:AAG1012  
 Cricotopus cf. curtus|BIOUG16329-A07|Kate Perez|BIN Taxonomy Match|BOLD:AAG1012  
 Cricotopus cf. curtus|BIOUG16259-F02|Kate Perez|BIN Taxonomy Match|BOLD:AAG1012  
 Cricotopus cf. curtus|BIOUG16435-H09|Kate Perez|BIN Taxonomy Match|BOLD:AAG1012  
 Cricotopus cf. curtus|BIOUG16258-B05|Kate Perez|BIN Taxonomy Match|BOLD:AAG1012  
 Cricotopus cf. curtus|BIOUG16205-B05|Kate Perez|BIN Taxonomy Match|BOLD:AAG1012  
 Cricotopus cf. curtus|BIOUG15966-A08|Kate Perez|BIN Taxonomy Match|BOLD:AAG1012  
 Cricotopus cf. curtus|BIOUG15794-C10|Kate Perez|BIN Taxonomy Match|BOLD:AAG1012  
 Cricotopus cf. curtus|BIOUG16333-H09|Kate Perez|BIN Taxonomy Match|BOLD:AAG1012  
 Cricotopus cf. curtus|BIOUG16333-F05|Kate Perez|BIN Taxonomy Match|BOLD:AAG1012  
 Cricotopus cf. curtus|BIOUG16331-G01|Kate Perez|BIN Taxonomy Match|BOLD:AAG1012



Cricotopus cf. curtus|BIOUG16333-H09|Kate Perez|BIN Taxonomy Match|BOLD: AAG1012  
 Cricotopus cf. curtus|BIOUG16333-F05|Kate Perez|BIN Taxonomy Match|BOLD: AAG1012  
 Cricotopus cf. curtus|BIOUG16331-G01|Kate Perez|BIN Taxonomy Match|BOLD: AAG1012  
 Cricotopus cf. curtus|BIOUG16331-A07|Kate Perez|BIN Taxonomy Match|BOLD: AAG1012  
 Cricotopus cf. curtus|BIOUG16330-F01|Kate Perez|BIN Taxonomy Match|BOLD: AAG1012  
 Cricotopus cf. curtus|BIOUG15963-F01|Kate Perez|BIN Taxonomy Match|BOLD: AAG1012  
 Cricotopus cf. curtus|BIOUG15954-H10|Kate Perez|BIN Taxonomy Match|BOLD: AAG1012  
 Cricotopus cf. curtus|BIOUG15948-C09|Kate Perez|BIN Taxonomy Match|BOLD: AAG1012  
 Cricotopus cf. curtus|BIOUG16260-D11|Kate Perez|BIN Taxonomy Match|BOLD: AAG1012  
 Cricotopus cf. curtus|BIOUG16333-A03|Kate Perez|BIN Taxonomy Match|BOLD: AAG1012  
 Cricotopus cf. curtus|BIOUG16330-H10|Kate Perez|BIN Taxonomy Match|BOLD: AAG1012  
 Cricotopus cf. curtus|BIOUG16332-A05|Kate Perez|BIN Taxonomy Match|BOLD: AAG1012  
 Cricotopus cf. curtus|BIOUG16433-F10|Kate Perez|BIN Taxonomy Match|BOLD: AAG1012  
 Cricotopus cf. curtus|BIOUG16430-C05|Kate Perez|BIN Taxonomy Match|BOLD: AAG1012  
 Cricotopus cf. curtus|BIOUG16431-D10|Kate Perez|BIN Taxonomy Match|BOLD: AAG1012  
 Cricotopus cf. curtus|BIOUG16626-A02|Kate Perez|BIN Taxonomy Match|BOLD: AAG1012  
 Cricotopus cf. curtus|BIOUG16260-F08|Kate Perez|BIN Taxonomy Match|BOLD: AAG1012  
 Cricotopus cf. curtus|BIOUG15954-B12|Kate Perez|BIN Taxonomy Match|BOLD: AAG1012  
 Cricotopus cf. curtus|BIOUG16330-C01|Kate Perez|BIN Taxonomy Match|BOLD: AAG1012  
 Cricotopus cf. curtus|BIOUG16333-B08|Kate Perez|BIN Taxonomy Match|BOLD: AAG1012  
 Cricotopus cf. curtus|BIOUG16260-F07|Kate Perez|BIN Taxonomy Match|BOLD: AAG1012  
 Cricotopus cf. curtus|BIOUG16433-E09|Kate Perez|BIN Taxonomy Match|BOLD: AAG1012  
 Cricotopus cf. curtus|BIOUG16433-G12|Kate Perez|BIN Taxonomy Match|BOLD: AAG1012  
 Cricotopus cf. curtus|BIOUG16431-E03|Kate Perez|BIN Taxonomy Match|BOLD: AAG1012  
 Cricotopus cf. curtus|BIOUG16435-G02|Kate Perez|BIN Taxonomy Match|BOLD: AAG1012  
 Cricotopus cf. curtus|BIOUG16478-F04|Kate Perez|BIN Taxonomy Match|BOLD: AAG1012  
 Cricotopus cf. curtus|BIOUG16479-C07|Kate Perez|BIN Taxonomy Match|BOLD: AAG1012  
 Cricotopus cf. curtus|BIOUG16478-E10|Kate Perez|BIN Taxonomy Match|BOLD: AAG1012  
 Cricotopus cf. curtus|BIOUG16480-H01|Kate Perez|BIN Taxonomy Match|BOLD: AAG1012  
 Cricotopus cf. curtus|BIOUG16430-G08|Kate Perez|BIN Taxonomy Match|BOLD: AAG1012  
 Cricotopus cf. curtus|BIOUG16430-G09|Kate Perez|BIN Taxonomy Match|BOLD: AAG1012  
 Cricotopus cf. curtus|BIOUG16431-D06|Kate Perez|BIN Taxonomy Match|BOLD: AAG1012  
 Cricotopus cf. curtus|BIOUG16431-F07|Kate Perez|BIN Taxonomy Match|BOLD: AAG1012  
 Cricotopus cf. curtus|BIOUG16432-C02|Kate Perez|BIN Taxonomy Match|BOLD: AAG1012  
 Cricotopus cf. curtus|BIOUG16433-C07|Kate Perez|BIN Taxonomy Match|BOLD: AAG1012  
 Cricotopus cf. curtus|BIOUG16477-B09|Kate Perez|BIN Taxonomy Match|BOLD: AAG1012  
 Cricotopus cf. curtus|BIOUG16477-D12|Kate Perez|BIN Taxonomy Match|BOLD: AAG1012  
 Cricotopus cf. curtus|BIOUG16477-F05|Kate Perez|BIN Taxonomy Match|BOLD: AAG1012  
 Cricotopus cf. curtus|BIOUG16332-F03|Kate Perez|BIN Taxonomy Match|BOLD: AAG1012  
 Cricotopus cf. curtus|BIOUG16552-F08|Kate Perez|BIN Taxonomy Match|BOLD: AAG1012  
 Cricotopus cf. curtus|BIOUG16479-G06|Kate Perez|BIN Taxonomy Match|BOLD: AAG1012  
 Cricotopus cf. curtus|BIOUG16297-D10|Kate Perez|BIN Taxonomy Match|BOLD: AAG1012  
 Cricotopus cf. curtus|BIOUG16433-C05|Kate Perez|BIN Taxonomy Match|BOLD: AAG1012  
 Cricotopus cf. curtus|BIOUG15952-B06|Kate Perez|BIN Taxonomy Match|BOLD: AAG1012  
 Cricotopus cf. curtus|BIOUG16426-H04|Kate Perez|BIN Taxonomy Match|BOLD: AAG1012  
 Cricotopus cf. curtus|BIOUG16480-C02|Kate Perez|BIN Taxonomy Match|BOLD: AAG1012  
 Cricotopus cf. curtus|BIOUG16433-A04|Kate Perez|BIN Taxonomy Match|BOLD: AAG1012  
 Cricotopus cf. curtus|BIOUG16480-A05|Kate Perez|BIN Taxonomy Match|BOLD: AAG1012  
 Cricotopus cf. curtus|BIOUG16476-F11|Kate Perez|BIN Taxonomy Match|BOLD: AAG1012  
 Cricotopus cf. curtus|BIOUG16261-C11|Kate Perez|BIN Taxonomy Match|BOLD: AAG1012  
 Cricotopus cf. curtus|BIOUG16435-A07|Kate Perez|BIN Taxonomy Match|BOLD: AAG1012  
 Cricotopus cf. curtus|BIOUG16479-F06|Kate Perez|BIN Taxonomy Match|BOLD: AAG1012  
 Cricotopus cf. curtus|BIOUG16433-A09|Kate Perez|BIN Taxonomy Match|BOLD: AAG1012  
 Cricotopus cf. curtus|BIOUG16436-H03|Kate Perez|BIN Taxonomy Match|BOLD: AAG1012  
 Cricotopus cf. curtus|BIOUG16299-A01|Kate Perez|BIN Taxonomy Match|BOLD: AAG1012  
 Cricotopus cf. curtus|BIOUG16329-C12|Kate Perez|BIN Taxonomy Match|BOLD: AAG1012  
 Cricotopus cf. curtus|BIOUG16436-G10|Kate Perez|BIN Taxonomy Match|BOLD: AAG1012  
 Cricotopus cf. curtus|BIOUG16259-A01|Kate Perez|BIN Taxonomy Match|BOLD: AAG1012  
 Cricotopus cf. curtus|BIOUG16477-G02|Kate Perez|BIN Taxonomy Match|BOLD: AAG1012  
 Cricotopus cf. curtus|BIOUG16431-D07|Kate Perez|BIN Taxonomy Match|BOLD: AAG1012  
 Cricotopus cf. curtus|BIOUG16478-C12|Kate Perez|BIN Taxonomy Match|BOLD: AAG1012  
 Cricotopus cf. curtus|BIOUG16480-B04|Kate Perez|BIN Taxonomy Match|BOLD: AAG1012  
 Cricotopus cf. curtus|BIOUG16626-F06|Kate Perez|BIN Taxonomy Match|BOLD: AAG1012  
 Cricotopus cf. curtus|BIOUG16432-B09|Kate Perez|BIN Taxonomy Match|BOLD: AAG1012  
 Cricotopus cf. curtus|BIOUG16433-B06|Kate Perez|BIN Taxonomy Match|BOLD: AAG1012  
 Cricotopus cf. curtus|BIOUG16480-F10|Kate Perez|BIN Taxonomy Match|BOLD: AAG1012  
 Cricotopus cf. curtus|BIOUG16299-C03|Kate Perez|BIN Taxonomy Match|BOLD: AAG1012  
 Cricotopus cf. curtus|BIOUG15966-H11|Kate Perez|BIN Taxonomy Match|BOLD: AAG1012  
 Cricotopus cf. curtus|BIOUG15951-E01|Kate Perez|BIN Taxonomy Match|BOLD: AAG1012  
 Cricotopus cf. curtus|BIOUG16259-F03|Kate Perez|BIN Taxonomy Match|BOLD: AAG1012  
 Cricotopus cf. curtus|BIOUG16298-D02|Kate Perez|BIN Taxonomy Match|BOLD: AAG1012  
 Cricotopus cf. curtus|BIOUG16296-F02|Kate Perez|BIN Taxonomy Match|BOLD: AAG1012  
 Cricotopus cf. curtus|BIOUG16261-G11|Kate Perez|BIN Taxonomy Match|BOLD: AAG1012  
 Cricotopus cf. curtus|BIOUG16596-E06|Kate Perez|BIN Taxonomy Match|BOLD: AAG1012  
 Cricotopus cf. curtus|BIOUG16596-E02|Kate Perez|BIN Taxonomy Match|BOLD: AAG1012  
 Cricotopus cf. curtus|BIOUG16330-G01|Kate Perez|BIN Taxonomy Match|BOLD: AAG1012  
 Cricotopus cf. curtus|BIOUG15948-B09|Kate Perez|BIN Taxonomy Match|BOLD: AAG1012  
 Cricotopus cf. curtus|BIOUG15947-D09|Kate Perez|BIN Taxonomy Match|BOLD: AAG1012  
 Cricotopus cf. curtus|NO65|Elisabeth Stur|BOLD: AAG1012  
 Telmatogeton japonicus|NHRS-BYWS000001078|Yngve Brodin|morphology|BOLD: ACV6061  
 Telmatogeton japonicus|NHRS-BYWS00000379|Yngve Brodin|morphology|BOLD: ACV6061  
 Cricotopus|CCDB24039-A06|Sofia Wiedenbrug|BIN Taxonomy Match|BOLD: AAI6019  
 Cricotopus|ZSM34342-G04|Sofia Wiedenbrug|Morphology|BOLD: AAI6019  
 Cricotopus|CCDB24039-A05|Sofia Wiedenbrug|BIN Taxonomy Match|BOLD: AAI6019  
 Cricotopus sp. 15ES|ES283|Elisabeth Stur|BOLD: AAI6019  
 Hydrobaenus pilipes|ZMUO.024320|Lauri Paasivirta|BOLD: ADA5503  
 Hydrobaenus pilipes|ZMUO.024319|Lauri Paasivirta|BOLD: ADA5503  
 Hydrobaenus pilipes|ZMUO.029784|Marko Mutanen|BOLD: ADA5503  
 Cricotopus|BIOUG17094-B12|Valerie Levesque-Beaudin|BIN Taxonomy Match|BOLD: ACQ9036  
 Cricotopus|BIOUG17265-B03|Valerie Levesque-Beaudin|BIN Taxonomy Match|BOLD: ACQ9036  
 Cricotopus|BIOUG16268-D08|Valerie Levesque-Beaudin|Digital Morphology|BOLD: ACQ9036  
 Cricotopus annulator|NHRS-BYWS00000518|Yngve Brodin|morphology|BOLD: AAF2345  
 Cricotopus annulator|NHRS-BYWS00000261|Yngve Brodin|morphology|BOLD: AAF2345  
 Cricotopus annulator|NHRS-BYWS00000289|Yngve Brodin|morphology|BOLD: AAF2345  
 Cricotopus annulator|Finmark232|Susan E. Gresens|BOLD: AAF2345  
 Cricotopus annulator|Finmark231|Susan E. Gresens|BOLD: AAF2345  
 Cricotopus annulator|NO11|Elisabeth Stur|BOLD: AAF2345  
 Cricotopus annulator|NO10|Elisabeth Stur|BOLD: AAF2345  
 Cricotopus annulator|NO09|Elisabeth Stur|BOLD: AAF2345  
 Cricotopus annulator|ZMUO.024715|Lauri Paasivirta|BOLD: AAF2345  
 Cricotopus annulator|ZMUO.024714|Lauri Paasivirta|BOLD: AAF2345  
 Cricotopus annulator|NHRS-BYWS00000144|Yngve Brodin|morphology|BOLD: AAF2345  
 Cricotopus annulator|BIOUG163950-C06|Kate Perez|BIN Taxonomy Match below Phylum (Jan 2019)|B

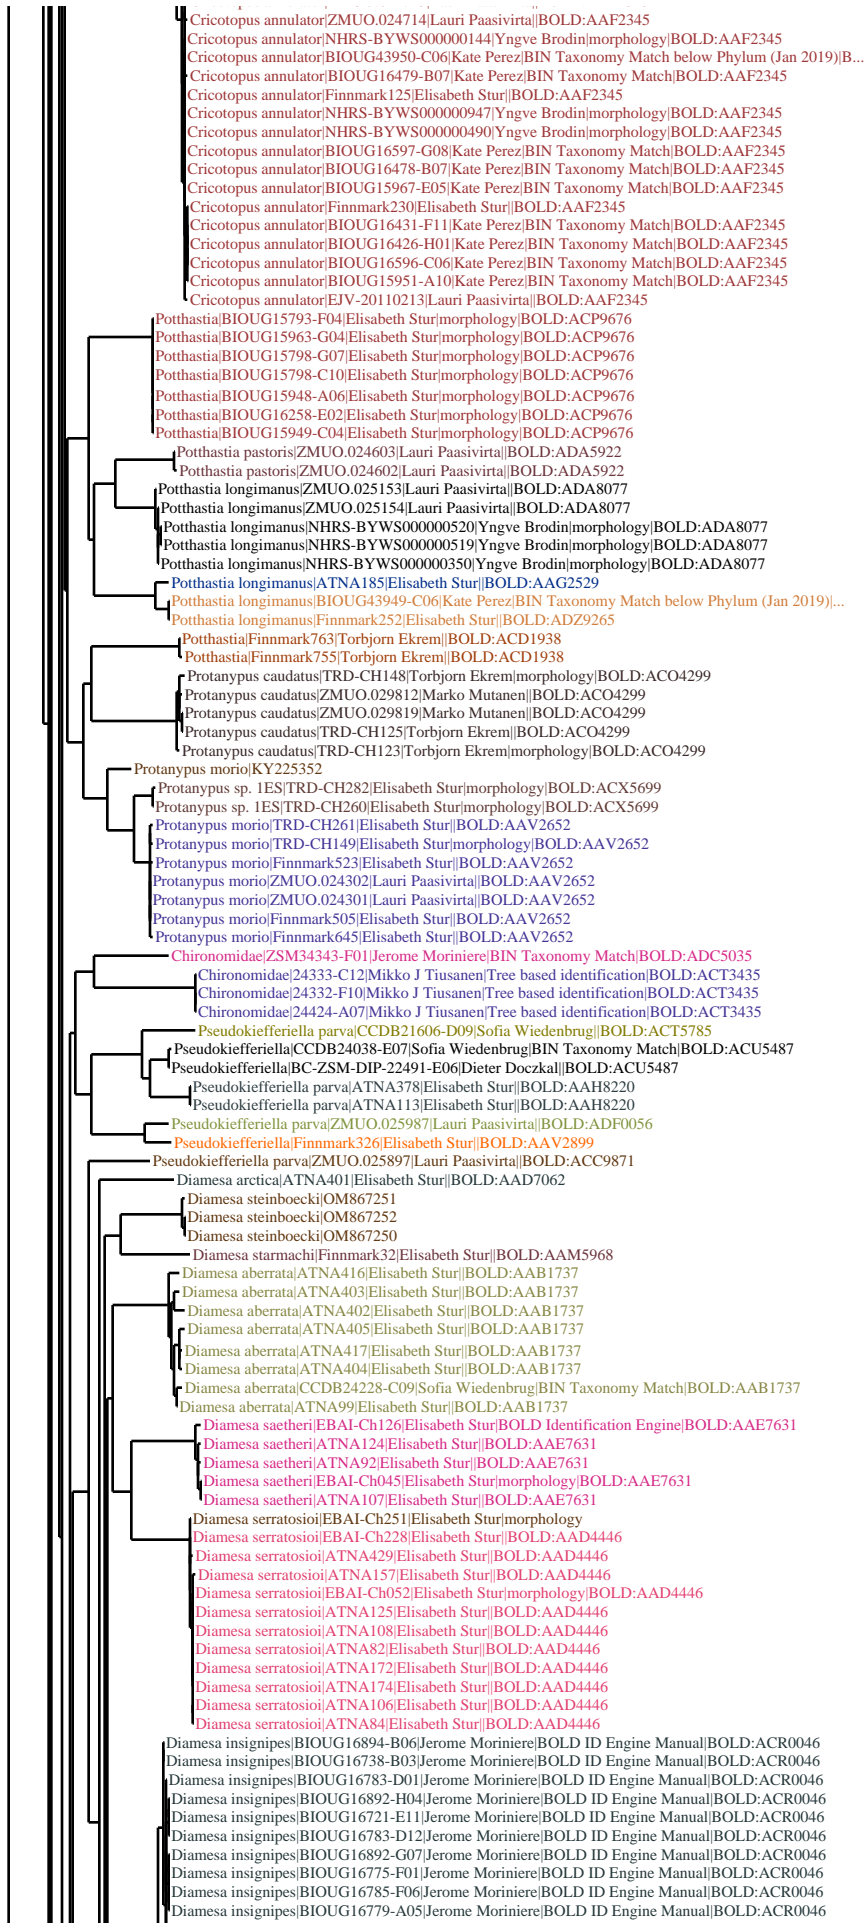





Diamesa insignipes|BIOUG16853-E12|Jerome Moriniere|BOLD ID Engine Manual|BOLD:ACR0046  
 Diamesa insignipes|BIOUG16894-B10|Jerome Moriniere|BOLD ID Engine Manual|BOLD:ACR0046  
 Diamesa insignipes|BIOUG16739-A04|Jerome Moriniere|BOLD ID Engine Manual|BOLD:ACR0046  
 Diamesa insignipes|BIOUG16783-G04|Jerome Moriniere|BOLD ID Engine Manual|BOLD:ACR0046  
 Diamesa insignipes|BIOUG16778-F06|Jerome Moriniere|BOLD ID Engine Manual|BOLD:ACR0046  
 Diamesa insignipes|BIOUG16782-D09|Jerome Moriniere|BOLD ID Engine Manual|BOLD:ACR0046  
 Diamesa insignipes|BIOUG16775-F05|Jerome Moriniere|BOLD ID Engine Manual|BOLD:ACR0046  
 Diamesa insignipes|BIOUG16739-G11|Jerome Moriniere|BOLD ID Engine Manual|BOLD:ACR0046  
 Diamesa insignipes|BIOUG16776-F03|Jerome Moriniere|BOLD ID Engine Manual|BOLD:ACR0046  
 Diamesa insignipes|BIOUG16855-H07|Jerome Moriniere|BOLD ID Engine Manual|BOLD:ACR0046  
 Diamesa insignipes|BIOUG16854-A05|Jerome Moriniere|BOLD ID Engine Manual|BOLD:ACR0046  
 Diamesa insignipes|BIOUG16783-C04|Jerome Moriniere|BOLD ID Engine Manual|BOLD:ACR0046  
 Diamesa insignipes|BIOUG16783-B09|Jerome Moriniere|BOLD ID Engine Manual|BOLD:ACR0046  
 Diamesa insignipes|BIOUG16721-E10|Jerome Moriniere|BOLD ID Engine Manual|BOLD:ACR0046  
 Diamesa insignipes|BIOUG16853-B02|Jerome Moriniere|BOLD ID Engine Manual|BOLD:ACR0046  
 Diamesa insignipes|BIOUG16777-F04|Jerome Moriniere|BOLD ID Engine Manual|BOLD:ACR0046  
 Diamesa insignipes|BIOUG16778-H01|Jerome Moriniere|BOLD ID Engine Manual|BOLD:ACR0046  
 Diamesa insignipes|BIOUG16856-B01|Jerome Moriniere|BOLD ID Engine Manual|BOLD:ACR0046  
 Diamesa insignipes|BIOUG16853-D11|Jerome Moriniere|BOLD ID Engine Manual|BOLD:ACR0046  
 Diamesa insignipes|BIOUG16853-H02|Jerome Moriniere|BOLD ID Engine Manual|BOLD:ACR0046  
 Diamesa insignipes|BIOUG16777-B02|Jerome Moriniere|BOLD ID Engine Manual|BOLD:ACR0046  
 Diamesa insignipes|BIOUG16779-C12|Jerome Moriniere|BOLD ID Engine Manual|BOLD:ACR0046  
 Diamesa insignipes|BIOUG16783-C11|Jerome Moriniere|BOLD ID Engine Manual|BOLD:ACR0046  
 Diamesa insignipes|BIOUG16740-E05|Jerome Moriniere|BOLD ID Engine Manual|BOLD:ACR0046  
 Diamesa insignipes|BIOUG16740-E10|Jerome Moriniere|BOLD ID Engine Manual|BOLD:ACR0046  
 Diamesa insignipes|BIOUG16857-D05|Jerome Moriniere|BOLD ID Engine Manual|BOLD:ACR0046  
 Diamesa insignipes|BIOUG16857-F02|Jerome Moriniere|BOLD ID Engine Manual|BOLD:ACR0046  
 Diamesa insignipes|BIOUG16777-G05|Jerome Moriniere|BOLD ID Engine Manual|BOLD:ACR0046  
 Diamesa insignipes|BIOUG16740-G09|Jerome Moriniere|BOLD ID Engine Manual|BOLD:ACR0046  
 Diamesa insignipes|BIOUG16783-H02|Jerome Moriniere|BOLD ID Engine Manual|BOLD:ACR0046  
 Diamesa insignipes|BIOUG16738-H05|Jerome Moriniere|BOLD ID Engine Manual|BOLD:ACR0046  
 Diamesa bertrami|EBAl-Ch048|Elisabeth Stur|morphology|BOLD: AAB9980  
 Diamesa bertrami|EBAl-Ch124|Elisabeth Stur|BOLD Identification Engine|BOLD: AAB9980  
 Diamesa bertrami|ATNA168|Elisabeth Stur|BOLD: AAB9980  
 Diamesa bertrami|EBAl-Ch224|Elisabeth Stur|morphology|BOLD: AAB9980  
 Diamesa bertrami|EBAl-Ch049|Elisabeth Stur|morphology|BOLD: AAB9980  
 Diamesa bertrami|EBAl-Ch132|Elisabeth Stur|BOLD Identification Engine|BOLD: AAB9980  
 Diamesa bertrami|ATNA10|Elisabeth Stur|BOLD: AAB9980  
 Diamesa bertrami|EBAl-Ch047|Elisabeth Stur|morphology|BOLD: AAB9980  
 Diamesa bertrami|EBAl-Ch056|Elisabeth Stur|morphology|BOLD: AAB9980  
 Diamesa bertrami|CCDB24228-E09|Sofia Wiedenbrug|BIN Taxonomy Match|BOLD: AAB9980  
 Diamesa bertrami|CCDB24039-E08|Sofia Wiedenbrug|BIN Taxonomy Match|BOLD: AAB9980  
 Diamesa bertrami|EBAl-Ch043|Elisabeth Stur|morphology|BOLD: AAB9980  
 Diamesa bertrami|EBAl-Ch058|Elisabeth Stur|morphology|BOLD: AAB9980  
 Diamesa bertrami|EBAl-Ch059|Elisabeth Stur|morphology|BOLD: AAB9980  
 Diamesa bertrami|EBAl-Ch123|Elisabeth Stur|BOLD Identification Engine|BOLD: AAB9980  
 Diamesa bertrami|EBAl-Ch129|Elisabeth Stur|BOLD Identification Engine|BOLD: AAB9980  
 Diamesa bertrami|EBAl-Ch133|Elisabeth Stur|BOLD Identification Engine|BOLD: AAB9980  
 Diamesa bertrami|EBAl-Ch054|Elisabeth Stur|morphology|BOLD: AAB9980  
 Diamesa bertrami|EBAl-Ch053|Elisabeth Stur|morphology|BOLD: AAB9980  
 Diamesa bertrami|EBAl-Ch042|Elisabeth Stur|morphology|BOLD: AAB9980  
 Diamesa bertrami|EBAl-Ch041|Elisabeth Stur|morphology|BOLD: AAB9980  
 Diamesa bertrami|EBAl-Ch249|Elisabeth Stur|BOLD: AAB9980  
 Diamesa bertrami|ATNA178|Elisabeth Stur|BOLD: AAB9980  
 Diamesa bertrami|ATNA103|Elisabeth Stur|BOLD: AAB9980  
 Diamesa bertrami|ATNA63|Elisabeth Stur|BOLD: AAB9980  
 Diamesa bertrami|ES383|Elisabeth Stur|BOLD: AAB9980  
 Diamesa incallida|ZMUO.026367|Marko Mutanen|BOLD: ADF1127  
 Diamesa incallida|ZMUO.025876|Lauri Paasivirta|BOLD: ADF1127  
 Diamesa incallida|ZMUO.025877|Lauri Paasivirta|BOLD: AAE7630  
 Diamesa incallida|BC-ZSM-DIP-22491-F12|Dieter Doczka|BOLD: AAE7630  
 Diamesa incallida|ATNA415|Elisabeth Stur|BOLD: AAE7630  
 Diamesa incallida|ATNA119|Elisabeth Stur|BOLD: AAE7630  
 Diamesa incallida|ATNA449|Elisabeth Stur|BOLD: AAE7630  
 Diamesa incallida|ATNA115|Elisabeth Stur|BOLD: AAE7630  
 Diamesa cf. aberrata|ATNA192|Elisabeth Stur|BOLD: AAB1738  
 Diamesa cf. aberrata|ATNA450|Elisabeth Stur|BOLD: AAB1738  
 Diamesa cf. aberrata|ATNA114|Elisabeth Stur|BOLD: AAB1738  
 Diamesa cf. aberrata|ATNA101|Elisabeth Stur|BOLD: AAB1738  
 Diamesa cf. aberrata|ATNA100|Elisabeth Stur|BOLD: AAB1738  
 Diamesa lindrothi|ATNA87|Elisabeth Stur|BOLD: AAC4741  
 Diamesa lindrothi|ATNA133|Elisabeth Stur|BOLD: AAC4741  
 Diamesa lindrothi|ATNA132|Elisabeth Stur|BOLD: AAC4741  
 Diamesa lindrothi|ATNA90|Elisabeth Stur|BOLD: AAC4741  
 Diamesa lindrothi|ATNA86|Elisabeth Stur|BOLD: AAC4741  
 Diamesa lindrothi|ATNA85|Elisabeth Stur|BOLD: AAC4741  
 Diamesa lindrothi|ATNA88|Elisabeth Stur|BOLD: AAC4741  
 Diamesa lindrothi|ATNA93|Elisabeth Stur|BOLD: AAC4741  
 Diamesa lindrothi|ATNA135|Elisabeth Stur|BOLD: AAC4741  
 Diamesa lindrothi|ATNA134|Elisabeth Stur|BOLD: AAC4741  
 Diamesa lindrothi|ATNA54|Elisabeth Stur|BOLD: AAC4741  
 Diamesa latitarsis|ATNA91|Elisabeth Stur|BOLD: AAC7191  
 Diamesa latitarsis|EBAl-Ch130|Elisabeth Stur|BOLD Identification Engine|BOLD: AAC7191  
 Diamesa latitarsis|EBAl-Ch226|Elisabeth Stur|BOLD: AAC7191  
 Diamesa latitarsis|EBAl-Ch128|Elisabeth Stur|BOLD Identification Engine|BOLD: AAC7191  
 Diamesa latitarsis|ATNA64|Elisabeth Stur|BOLD: AAC7191  
 Diamesa latitarsis|BC-ZSM-DIP-22551-C07|Dieter Doczka|BOLD: AAC7191  
 Diamesa latitarsis|EBAl-Ch057|Elisabeth Stur|morphology|BOLD: AAC7191  
 Diamesa latitarsis|EBAl-Ch055|Elisabeth Stur|BOLD Identification Engine|BOLD: AAC7191  
 Diamesa latitarsis|EBAl-Ch062|Elisabeth Stur|morphology|BOLD: AAC7191  
 Diamesa latitarsis|EBAl-Ch051|Elisabeth Stur|BOLD Identification Engine|BOLD: AAC7191  
 Diamesa latitarsis|EBAl-Ch050|Elisabeth Stur|morphology|BOLD: AAC7191  
 Diamesa latitarsis|EBAl-Ch044|Elisabeth Stur|morphology|BOLD: AAC7191  
 Diamesa latitarsis|EBAl-Ch131|Elisabeth Stur|BOLD Identification Engine|BOLD: AAC7191  
 Diamesa latitarsis|EBAl-Ch225|Elisabeth Stur|BOLD: AAC7191  
 Diamesa latitarsis|ATNA60|Elisabeth Stur|BOLD: AAC7191  
 Diamesa latitarsis|ATNA11|Elisabeth Stur|BOLD: AAC7191  
 Diamesa latitarsis|ATNA155|Elisabeth Stur|BOLD: AAC7191  
 Diamesa latitarsis|ATNA149|Elisabeth Stur|BOLD: AAC7191  
 Diamesa latitarsis|ATNA89|Elisabeth Stur|BOLD: AAC7191  
 Diamesa latitarsis|ES282|BOLD: AAC7191  
 Diamesa steinboeckii|OM867253  
 Diamesa bertrami|CCDB24229-E09|Sofia Wiedenbrug|BIN Taxonomy Match|BOLD: AAD5112

*Diamesa latitarsis*|ES282||BOLD:AA7191  
*Diamesa steinboeckii*|OM867253  
*Diamesa bohemani*|CCDB24229-F04|Sofia Wiedenbrug|BIN Taxonomy Match|BOLD:AAB5113  
*Diamesa bohemani*|BC-ZSM-DIP-22551-F04|Dieter Doczkal||BOLD:AAB5113  
*Diamesa bohemani*|ATNA412|Elisabeth Stur||BOLD:AAB5113  
*Diamesa bohemani*|CCDB24229-E10|Sofia Wiedenbrug|BIN Taxonomy Match|BOLD:AAB5113  
*Diamesa bohemani*|CCDB24229-E01|Sofia Wiedenbrug|BIN Taxonomy Match|BOLD:AAB5113  
*Diamesa bohemani*|EBAI-Ch061|Elisabeth Stur|morphology|BOLD:AAB5113  
*Diamesa bohemani*|BC-ZSM-DIP-22551-C10|Dieter Doczkal||BOLD:AAB5113  
*Diamesa bohemani*|BC-ZSM-DIP-22488-C05|Dieter Doczkal||BOLD:AAB5113  
*Diamesa bohemani*|CCDB24228-E08|Sofia Wiedenbrug|BIN Taxonomy Match|BOLD:AAB5113  
*Diamesa steinboeckii*|OM867254  
*Diamesa bohemani*|ATNA312|Elisabeth Stur||BOLD:AAB5113  
*Diamesa bohemani*|EBAI-Ch060|Elisabeth Stur|morphology|BOLD:AAB5113  
*Diamesa bohemani*|BC-ZSM-DIP-22551-E06|Dieter Doczkal||BOLD:AAB5113  
*Diamesa bohemani*|ATNA413|Elisabeth Stur||BOLD:AAB5113  
*Diamesa bohemani*|ATNA102|Elisabeth Stur||BOLD:AAB5113  
*Diamesa bohemani*|ATNA446|Elisabeth Stur||BOLD:AAB5113  
*Diamesa bohemani*|ATNA445|Elisabeth Stur||BOLD:AAB5113  
*Diamesa*|ZSM-DIP-33148-F01|Caroline Chimenó|BIN Taxonomy Match (Jan 2022)|BOLD:AAB5106  
*Diamesa*|ZSM-DIP-33172-B10|Caroline Chimenó|BIN Taxonomy Match (Jan 2022)|BOLD:AAB5106  
*Diamesa tonsa*|BC-ZSM-DIP-22551-D06|Dieter Doczkal||BOLD:AAB5106  
*Diamesa tonsa*|BC-ZSM-DIP-22488-E02|Dieter Doczkal||BOLD:AAB5106  
*Diamesa*|ZSM-DIP-33148-E06|Caroline Chimenó|BIN Taxonomy Match (Jan 2022)|BOLD:AAB5106  
*Diamesa*|ZSM-DIP-33148-G03|Caroline Chimenó|BIN Taxonomy Match (Jan 2022)|BOLD:AAB5106  
*Diamesa tonsa*|CCDB24038-B06|Sofia Wiedenbrug|BIN Taxonomy Match|BOLD:AAB5106  
*Diamesa tonsa*|BC-ZSM-DIP-22551-F01|Dieter Doczkal||BOLD:AAB5106  
*Diamesa tonsa*|CCDB24039-G02|Sofia Wiedenbrug|BIN Taxonomy Match|BOLD:AAB5106  
*Diamesa tonsa*|CCDB24229-D05|Sofia Wiedenbrug|BIN Taxonomy Match|BOLD:AAB5106  
*Diamesa tonsa*|BC-ZSM-DIP-22491-F02|Dieter Doczkal||BOLD:AAB5106  
*Diamesa*|ZSM-DIP-33148-G09|Caroline Chimenó|BIN Taxonomy Match (Jan 2022)|BOLD:AAB5106  
*Diamesa tonsa*|CCDB24229-E03|Sofia Wiedenbrug||BOLD:AAB5106  
*Diamesa tonsa*|CCDB24039-E09|Sofia Wiedenbrug|BIN Taxonomy Match|BOLD:AAB5106  
*Diamesa*|EBAI-Ch125|Elisabeth Stur|morphology|BOLD:AAB5106  
*Diamesa tonsa*|CCDB24038-C09|Sofia Wiedenbrug|BIN Taxonomy Match|BOLD:AAB5106  
*Diamesa*|ZSM-DIP-33172-B09|Caroline Chimenó|BIN Taxonomy Match (Jan 2022)|BOLD:AAB5106  
*Diamesa tonsa*|BC-ZSM-DIP-22491-G05|Dieter Doczkal||BOLD:AAB5106  
*Diamesa tonsa*|CCDB24039-E10|Sofia Wiedenbrug|BIN Taxonomy Match|BOLD:AAB5106  
*Diamesa tonsa*|CCDB24228-F10|Sofia Wiedenbrug|BIN Taxonomy Match|BOLD:AAB5106  
*Diamesa tonsa*|BC-ZSM-DIP-22551-E09|Dieter Doczkal||BOLD:AAB5106  
*Diamesa tonsa*|CCDB21605-A10|Sofia Wiedenbrug||BOLD:AAB5106  
*Diamesa tonsa*|BC-ZSM-DIP-22491-G02|Dieter Doczkal||BOLD:AAB5106  
*Diamesa tonsa*|ZSM34343-F02|Sofia Wiedenbrug|BIN-taxonomy|BOLD:AAB5106  
*Diamesa tonsa*|CCDB24229-C01|Sofia Wiedenbrug|BIN Taxonomy Match|BOLD:AAB5106  
*Diamesa tonsa*|BC-ZSM-DIP-22491-E08|Dieter Doczkal||BOLD:AAB5106  
*Diamesa*|ZSM-DIP-33148-E05|Caroline Chimenó|BIN Taxonomy Match (Jan 2022)|BOLD:AAB5106  
*Diamesa*|ZSM-DIP-33148-E04|Caroline Chimenó|BIN Taxonomy Match (Jan 2022)|BOLD:AAB5106  
*Diamesa*|ZSM-DIP-33148-G08|Caroline Chimenó|BIN Taxonomy Match (Jan 2022)|BOLD:AAB5106  
*Diamesa tonsa*|ZSM34342-C12|Sofia Wiedenbrug|BIN-taxonomy|BOLD:AAB5106  
*Diamesa tonsa*|BC-ZSM-DIP-22491-G06|Dieter Doczkal||BOLD:AAB5106  
*Diamesa tonsa*|BC-ZSM-DIP-22491-H11|Dieter Doczkal||BOLD:AAB5106  
*Diamesa tonsa*|BC-ZSM-DIP-22491-F07|Dieter Doczkal||BOLD:AAB5106  
*Diamesa cinerella*|MT362508||BOLD:AAB5106  
*Diamesa*|ZSM-DIP-33148-F02|Caroline Chimenó|BIN Taxonomy Match (Jan 2022)|BOLD:AAB5106  
*Diamesa tonsa*|CCDB24229-H08|Sofia Wiedenbrug|BIN Taxonomy Match|BOLD:AAB5106  
*Diamesa tonsa*|BC-ZSM-DIP-22551-D10|Dieter Doczkal||BOLD:AAB5106  
*Diamesa tonsa*|CCDB24039-B09|Sofia Wiedenbrug|BIN Taxonomy Match|BOLD:AAB5106  
*Diamesa tonsa*|BC-ZSM-DIP-22491-F09|Dieter Doczkal||BOLD:AAB5106  
*Diamesa*|ZSM-DIP-33148-F04|Caroline Chimenó|BIN Taxonomy Match (Jan 2022)|BOLD:AAB5106  
*Diamesa*|ES281||BOLD:AAB5106  
*Diamesa*|EBAI-Ch039|Elisabeth Stur|morphology|BOLD:AAB5106  
*Diamesa*|ATNA189|Elisabeth Stur||BOLD:AAB5106  
*Diamesa hyperborea*|ATNA81|Elisabeth Stur||BOLD:AAB5106  
*Diamesa hyperborea*|ATNA57|Elisabeth Stur||BOLD:AAB5106  
*Diamesa hyperborea*|ATNA58|Elisabeth Stur||BOLD:AAB5106  
*Diamesa*|ATNA190|Elisabeth Stur||BOLD:AAB5106  
*Diamesa tonsa*|ATNA109|Elisabeth Stur||BOLD:AAB5106  
*Diamesa*|ATNA170|Elisabeth Stur||BOLD:AAB5106  
*Diamesa*|ATNA13|Elisabeth Stur||BOLD:AAB5106  
*Diamesa hyperborea*|ATNA55|Elisabeth Stur||BOLD:AAB5106  
*Diamesa hyperborea*|ATNA66|Elisabeth Stur||BOLD:AAB5106  
*Diamesa hyperborea*|ATNA80|Elisabeth Stur||BOLD:AAB5106  
*Diamesa*|ATNA372|Elisabeth Stur||BOLD:AAB5106  
*Diamesa*|EBAI-Ch229|Elisabeth Stur|morphology|BOLD:AAB5106  
*Diamesa tonsa*|ATNA96|Elisabeth Stur||BOLD:AAB5106  
*Diamesa hyperborea*|ATNA83|Elisabeth Stur||BOLD:AAB5106  
*Diamesa*|ATNA169|Elisabeth Stur||BOLD:AAB5106  
*Diamesa hyperborea*|ATNA110|Elisabeth Stur||BOLD:AAB5106  
*Diamesa tonsa*|ATNA112|Elisabeth Stur||BOLD:AAB5106  
*Diamesa*|ATNA146|Elisabeth Stur||BOLD:AAB5106  
*Diamesa*|ATNA163|Elisabeth Stur||BOLD:AAB5106  
*Diamesa*|ATNA175|Elisabeth Stur||BOLD:AAB5106  
*Diamesa*|ATNA188|Elisabeth Stur||BOLD:AAB5106  
*Diamesa*|ATNA191|Elisabeth Stur||BOLD:AAB5106  
*Diamesa tonsa*|ATNA111|Elisabeth Stur||BOLD:AAB5106  
*Diamesa*|ATNA156|Elisabeth Stur||BOLD:AAB5106  
*Diamesa*|EBAI-Ch231|Elisabeth Stur|morphology|BOLD:AAB5106  
*Diamesa*|EBAI-Ch232|Elisabeth Stur||BOLD:AAB5106  
*Diamesa*|EBAI-Ch250|Elisabeth Stur|morphology|BOLD:AAB5106  
*Diamesa*|EBAI-Ch230|Elisabeth Stur||BOLD:AAB5106  
*Diamesa*|EBAI-Ch233|Elisabeth Stur||BOLD:AAB5106  
*Diamesa*|EBAI-Ch127|Elisabeth Stur|morphology|BOLD:AAB5106  
*Diamesa hyperborea*|ATNA97|Elisabeth Stur||BOLD:AAB5106  
*Diamesa*|EBAI-Ch040|Elisabeth Stur|morphology|BOLD:AAB5106  
*Diamesa*|ATNA140|Elisabeth Stur||BOLD:AAB5106  
*Diamesa*|BIOUG15201-H05|Kate Perez|BIN Taxonomy Match|BOLD:AAB5106  
*Diamesa*|EBAI-Ch227|Elisabeth Stur||BOLD:AAB5106  
*Diamesa*|BIOUG15591-G09|Kate Perez|BIN Taxonomy Match|BOLD:AAB5106  
*Diamesa hyperborea*|ATNA98|Elisabeth Stur||BOLD:AAB5106  
*Diamesa hyperborea*|ATNA56|Elisabeth Stur||BOLD:AAB5106  
*Diamesa tonsa*|TRD-CH81|Elisabeth Stur||BOLD:AAB5106  
*Diamesa hyperborea*|Finmark540|Elisabeth Stur||BOLD:AAB5106

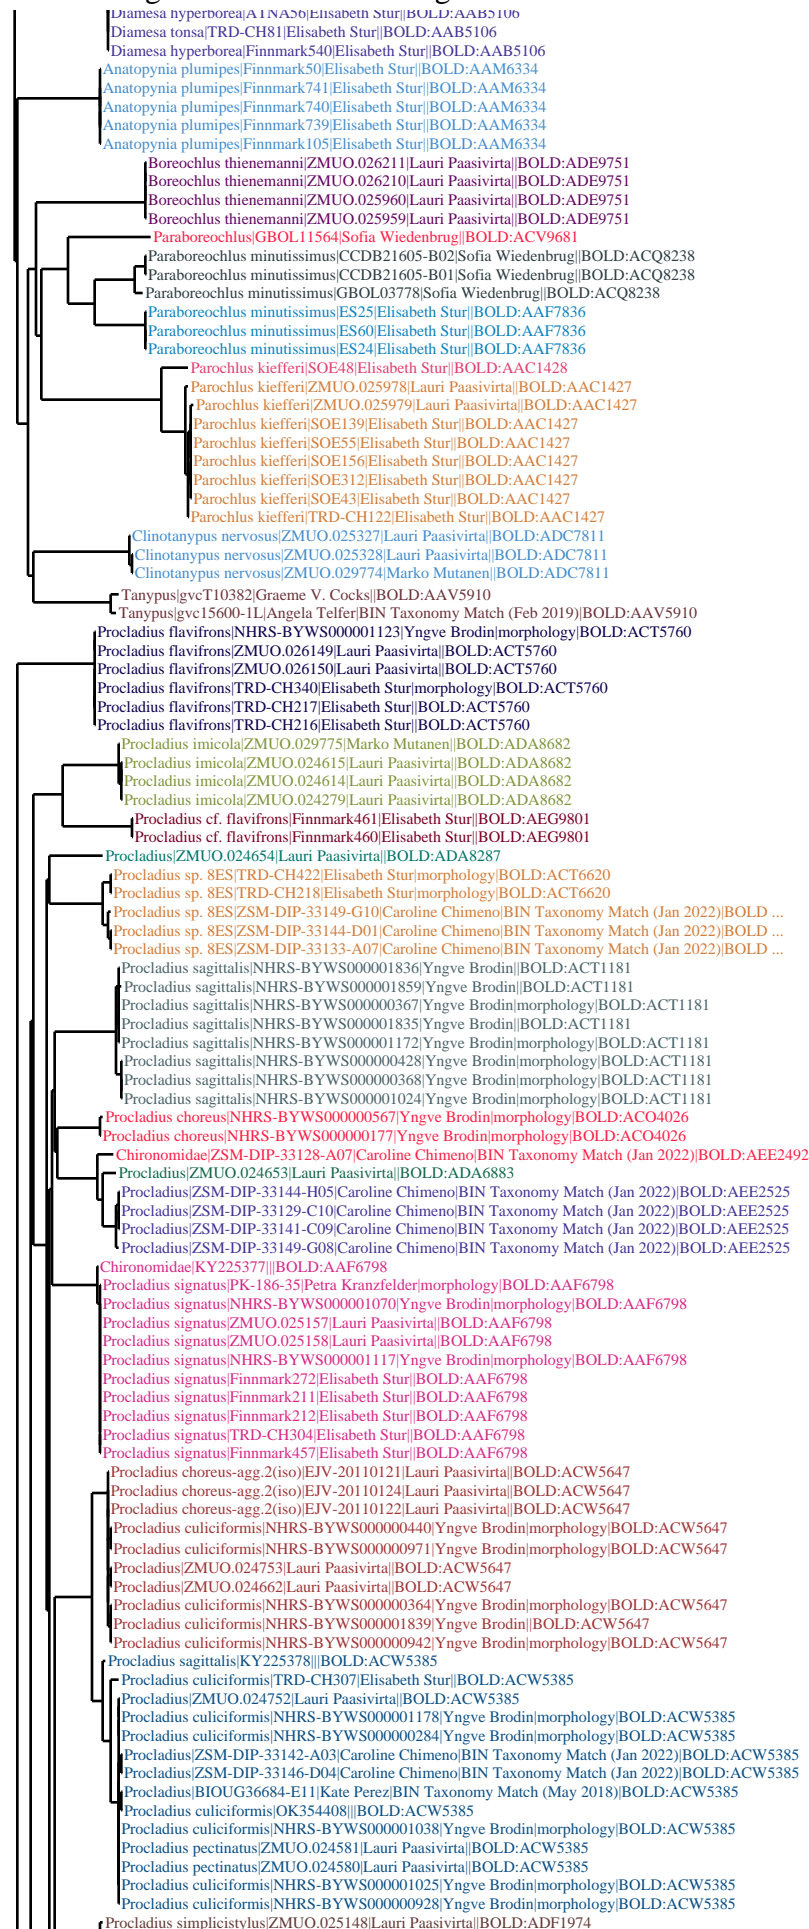

Procladius culiciformis|NHRS-BYWS000001025|Yngve Brodin|morphology|BOLD:ACW5385  
 Procladius culiciformis|NHRS-BYWS00000928|Yngve Brodin|morphology|BOLD:ACW5385  
 Procladius simplicistylus|ZMUO.025148|Lauri Paasivirta|BOLD:ADF1974  
 Procladius simplicistylus|ZMUO.025147|Lauri Paasivirta|BOLD:ADF1974  
 Procladius crassinervis|CCDB22603-B04|Sofia Wiedenbrug|BOLD:ACQ1725  
 Procladius crassinervis|CCDB22603-B03|Sofia Wiedenbrug|BOLD:ACQ1725  
 Procladius|ZSM-DIP-33138-D07|Caroline Chimeno|BIN Taxonomy Match (Jan 2022)|BOLD:AAG3921  
 Procladius|ZMUO.024663|Lauri Paasivirta|BOLD:AAG3921  
 Procladius nigriventris|TRD-CH204|Elisabeth Stur|BOLD:AAG3921  
 Procladius nigriventris|TRD-CH72|Elisabeth Stur|BOLD:AAG3921  
 Procladius nigriventris|NO 90|Elisabeth Stur|BOLD:AAG3921  
 Procladius nigriventris|TRD-CH178|Elisabeth Stur|BOLD:AAG3921  
 Procladius nigriventris|Finmark102|Elisabeth Stur|BOLD:AAG3921  
 Procladius|ZSM-DIP-33130-G04|Caroline Chimeno|BIN Taxonomy Match (Jan 2022)|BOLD:AAG3921  
 Procladius nigriventris|Finmark79|Elisabeth Stur|BOLD:AAG3921  
 Procladius|ZMUO.024612|Lauri Paasivirta|BOLD:AAG3921  
 Procladius nigriventris|Finmark101|Elisabeth Stur|BOLD:AAG3921  
 Procladius nigriventris|Finmark794|Elisabeth Stur|BOLD:AAG3921  
 Procladius nigriventris|Finmark40|Elisabeth Stur|BOLD:AAG3921  
 Procladius nigriventris|ATNA75|Elisabeth Stur|BOLD:AAG3921  
 Procladius nigriventris|TRD-CH97|Elisabeth Stur|BOLD:AAG3921  
 Procladius|ZMUO.026228|Lauri Paasivirta|BOLD:ACS2256  
 Procladius|ZMUO.026227|Lauri Paasivirta|BOLD:ACS2256  
 Procladius barbatus|Finmark649|Elisabeth Stur|BOLD:AAV2572  
 Procladius frigidus|Finmark384|Elisabeth Stur|BOLD:AAB9256  
 Procladius frigidus|Finmark33|Elisabeth Stur|BOLD:AAB9256  
 Procladius frigidus|Finmark354|Elisabeth Stur|BOLD:AAB9256  
 Procladius crassinervis|BIOUG43949-H05|Kate Perez|BIN Taxonomy Match below Phylum (Jan 2019 ...  
 Procladius frigidus|Finmark728|Elisabeth Stur|BOLD:AAB9256  
 Procladius frigidus|Finmark386|Elisabeth Stur|BOLD:AAB9256  
 Procladius frigidus|Finmark803|Elisabeth Stur|BOLD:AAB9256  
 Procladius|ZMUO.024613|Lauri Paasivirta|BOLD:AAB9256  
 Procladius|ZMUO.024291|Lauri Paasivirta|BOLD:AAB9256  
 Procladius pectinatus|ZMUO.024665|Lauri Paasivirta|BOLD:AAB9256  
 Procladius pectinatus|ZMUO.024666|Lauri Paasivirta|BOLD:AAB9256  
 Procladius|ZMUO.024622|Lauri Paasivirta|BOLD:AAB9256  
 Procladius|ZMUO.024621|Lauri Paasivirta|BOLD:AAB9256  
 Procladius|ZMUO.024290|Lauri Paasivirta|BOLD:AAB9256  
 Procladius appropinquatus|ZMUO.026204|Lauri Paasivirta|BOLD:ADF1163  
 Procladius appropinquatus|ZMUO.026203|Lauri Paasivirta|BOLD:ADF1163  
 Procladius appropinquatus|NHRS-BYWS00000396|Yngve Brodin|morphology|BOLD:ADF1163  
 Procladius cf. ruris|SOE297|Torbjorn Ekrem|BOLD:AEB4593  
 Procladius|ZMUO.026285|Lauri Paasivirta|BOLD:AAD7251  
 Procladius dentus|Finmark405|Elisabeth Stur|BOLD:AAD7251  
 Procladius dentus|Finmark459|Elisabeth Stur|BOLD:AAD7251  
 Procladius nr. fuscus|ZMUO.025304|Lauri Paasivirta|BOLD:ACY8325  
 Procladius|ZSM-DIP-33148-D01|Caroline Chimeno|BIN Taxonomy Match (Jan 2022)|BOLD:ACY8325  
 Procladius cf. pruinusos|NHRS-BYWS00000547|Yngve Brodin|morphology|BOLD:ACY8325  
 Procladius cf. pruinusos|NHRS-BYWS00000562|Yngve Brodin|morphology|BOLD:ACY8325  
 Procladius pruinusos|TRD-CH70|Yngve Brodin|morphology|BOLD:ACY8325  
 Procladius pruinusos|NO 89|Elisabeth Stur|morphology|BOLD:ACY8325  
 Procladius pruinusos|NO 88|Yngve Brodin|morphology|BOLD:ACY8325  
 Procladius pruinusos|TRD-CH351|Yngve Brodin|morphology|BOLD:ACY8325  
 Procladius pruinusos|TRD-CH205|Elisabeth Stur|morphology|BOLD:ACY8325  
 Procladius|BIOUG55114-D03|Kate Perez|BIN Taxonomy Match (Oct 2020)|BOLD:AER3360  
 Procladius cf. cinereus|TRD-CH293|Elisabeth Stur|morphology|BOLD:AER3360  
 Procladius|ZSM-DIP-33133-G04|Caroline Chimeno|BIN Taxonomy Match (Jan 2022)|BOLD:AER3360  
 Procladius crassinervis|NHRS-BYWS00000530|Yngve Brodin|morphology|BOLD:AER3361  
 Procladius|ZMUO.026148|Lauri Paasivirta|BOLD:AER3361  
 Procladius|ZMUO.026147|Lauri Paasivirta|BOLD:AER3361  
 Procladius choreus-agg.1|EJV-20110051|Lauri Paasivirta|BOLD:AER3362  
 Procladius choreus-agg.1|EJV-20110054|Lauri Paasivirta|BOLD:AER3362  
 Procladius choreus-agg.1|EJV-20110056|Lauri Paasivirta|BOLD:AER3362  
 Procladius choreus-agg.1|EJV-20110047|Lauri Paasivirta|BOLD:AER3362  
 Procladius choreus-agg.1|EJV-20110055|Lauri Paasivirta|BOLD:AER3362  
 Procladius choreus-agg.1|EJV-20110053|Lauri Paasivirta|BOLD:AER3362  
 Procladius choreus-agg.1|EJV-20110052|Lauri Paasivirta|BOLD:AER3362  
 Procladius choreus-agg.1|EJV-20110050|Lauri Paasivirta|BOLD:AER3362  
 Procladius choreus-agg.1|EJV-20110048|Lauri Paasivirta|BOLD:AER3362  
 Procladius choreus-agg.cinereus-t.|EJV-20110221|Lauri Paasivirta|BOLD:AAG5487  
 Procladius crassinervis|NHRS-BYWS000001837|Yngve Brodin|BOLD:AAG5487  
 Procladius crassinervis|NHRS-BYWS000000913|Yngve Brodin|morphology|BOLD:AAG5487  
 Chironomidae|ZSM-DIP-33147-B09|Caroline Chimeno|BIN Taxonomy Match (Jan 2022)|BOLD:AAG5487  
 Chironomidae|ZSM-DIP-33131-E01|Caroline Chimeno|BIN Taxonomy Match (Jan 2022)|BOLD:AAG5487  
 Chironomidae|CCDB21605-G02|Sofia Wiedenbrug|no morphological identification - introduction of int...  
 Chironomidae|ZSM-DIP-33147-A12|Caroline Chimeno|BIN Taxonomy Match (Jan 2022)|BOLD:AAG5487  
 Procladius crassinervis|NHRS-BYWS00000581|Yngve Brodin|morphology|BOLD:AAG5487  
 Procladius crassinervis|NHRS-BYWS000000962|Yngve Brodin|morphology|BOLD:AAG5487  
 Procladius crassinervis|NHRS-BYWS000001039|Yngve Brodin|morphology|BOLD:AAG5487  
 Procladius crassinervis|NHRS-BYWS000000216|Yngve Brodin|morphology|BOLD:AAG5487  
 Procladius crassinervis|NHRS-BYWS000000253|Yngve Brodin|morphology|BOLD:AAG5487  
 Procladius crassinervis|NHRS-BYWS000000372|Yngve Brodin|morphology|BOLD:AAG5487  
 Procladius crassinervis|NHRS-BYWS000000574|Yngve Brodin|morphology|BOLD:AAG5487  
 Chironomidae|CCDB22605-H11|Sofia Wiedenbrug|no morphological identification - introduction of int...  
 Procladius|ZSM-DIP-33143-E12|Caroline Chimeno|BIN Taxonomy Match (Jan 2022)|BOLD:AAG5487  
 Procladius|ZSM-DIP-33146-H07|Caroline Chimeno|BIN Taxonomy Match (Jan 2022)|BOLD:AAG5487  
 Procladius|ZSM-DIP-33147-B03|Caroline Chimeno|BIN Taxonomy Match (Jan 2022)|BOLD:AAG5487  
 Chironomidae|ZSM-DIP-33143-H04|Caroline Chimeno|BIN Taxonomy Match (Jan 2022)|BOLD:AAG5487  
 Chironomidae|ZSM-DIP-33146-H05|Caroline Chimeno|BIN Taxonomy Match (Jan 2022)|BOLD:AAG5487  
 Chironomidae|ZSM-DIP-33146-H06|Caroline Chimeno|BIN Taxonomy Match (Jan 2022)|BOLD:AAG5487  
 Chironomidae|ZSM-DIP-33146-H08|Caroline Chimeno|BIN Taxonomy Match (Jan 2022)|BOLD:AAG5487  
 Chironomidae|ZSM-DIP-33147-B01|Caroline Chimeno|BIN Taxonomy Match (Jan 2022)|BOLD:AAG5487  
 Chironomidae|ZSM-DIP-33147-B02|Caroline Chimeno|BIN Taxonomy Match (Jan 2022)|BOLD:AAG5487  
 Chironomidae|ZSM-DIP-33149-B05|Caroline Chimeno|BIN Taxonomy Match (Jan 2022)|BOLD:AAG5487  
 Chironomidae|ZSM-DIP-33149-B06|Caroline Chimeno|BIN Taxonomy Match (Jan 2022)|BOLD:AAG5487  
 Chironomidae|ZSM-DIP-33149-B07|Caroline Chimeno|BIN Taxonomy Match (Jan 2022)|BOLD:AAG5487  
 Chironomidae|ZSM-DIP-33149-F08|Caroline Chimeno|BIN Taxonomy Match (Jan 2022)|BOLD:AAG5487  
 Chironomidae|ZSM-DIP-33149-F09|Caroline Chimeno|BIN Taxonomy Match (Jan 2022)|BOLD:AAG5487  
 Chironomidae|ZSM-DIP-33143-H03|Caroline Chimeno|BIN Taxonomy Match (Jan 2022)|BOLD:AAG5487  
 Procladius|ZSM-DIP-33147-B04|Caroline Chimeno|BIN Taxonomy Match (Jan 2022)|BOLD:AAG5487  
 Procladius crassinervis|NHRS-BYWS00000215|Yngve Brodin|morphology|BOLD:AAG5487  
 Procladius crassinervis|NHRS-BYWS000001838|Yngve Brodin|BOLD:AAG5487  
 Procladius crassinervis|NHRS-BYWS000000914|Yngve Brodin|morphology|BOLD:AAG5487



Procladius crassinervis|NHRS-BYWS00000215|Yngve Brodin|morphology|BOLD:AAG5487  
 Procladius crassinervis|NHRS-BYWS000001838|Yngve Brodin|BOLD:AAG5487  
 Procladius crassinervis|NHRS-BYWS000000914|Yngve Brodin|morphology|BOLD:AAG5487  
 Procladius crassinervis|NHRS-BYWS000000580|Yngve Brodin|morphology|BOLD:AAG5487  
 Procladius rufovittatus|NHRS-BYWS000001167|Yngve Brodin|morphology|BOLD:ADA8642  
 Procladius nudipennis|ZMUO.025139|Lauri Paasivirta|BOLD:ADA8642  
 Procladius nudipennis|ZMUO.025138|Lauri Paasivirta|BOLD:ADA8642  
 Procladius nudipennis|ZMUO.024285|Lauri Paasivirta|BOLD:ADA8642  
 Procladius nudipennis|ZMUO.024284|Lauri Paasivirta|BOLD:ADA8642  
 Procladius rufovittatus|ZMUO.025180|Lauri Paasivirta|BOLD:AAG5527  
 Procladius rufovittatus|ZMUO.025181|Lauri Paasivirta|BOLD:AAG5527  
 Procladius rufovittatus|BIOUG55141-D03|Kate Perez|BIN Taxonomy Match (Oct 2020)|BOLD:AAG...  
 Procladius rufovittatus|BIOUG55191-G06|Kate Perez|BIN Taxonomy Match (Oct 2020)|BOLD:AAG...  
 Procladius rufovittatus|BIOUG55123-B07|Kate Perez|BIN Taxonomy Match (Oct 2020)|BOLD:AAG...  
 Procladius rufovittatus|ZSM-DIP-33132-F03|Caroline Chimeno|BIN Taxonomy Match (Jan 2022)|BO...  
 Tanypus kraatzii|LC495091||BOLD:ACV5726  
 Tanypus kraatzii|NIESD0221|Ryuhei Ueno|Morphology|BOLD:ACV5726  
 Tanypus kraatzii|LC050911||BOLD:ACV5726  
 Tanypus kraatzii|LC494874||BOLD:ACV5726  
 Tanypus kraatzii|LC050912||BOLD:ACV5726  
 Tanypus kraatzii|NIESD0418|Ryuhei Ueno|Morphology|BOLD:ACV5726  
 Tanypus kraatzii|LC494774||BOLD:ACV5726  
 Tanypus kraatzii|LC495105||BOLD:ACV5726  
 Tanypus kraatzii|LC495113||BOLD:ACV5726  
 Tanypus kraatzii|LC495100||BOLD:ACV5726  
 Tanypus kraatzii|LC494844||BOLD:ACV5726  
 Tanypus kraatzii|LC050918||BOLD:ACV5726  
 Tanypus kraatzii|NIESD0485|Ryuhei Ueno|Morphology|BOLD:ACV5726  
 Tanypus kraatzii|LC050914||BOLD:ACV5726  
 Tanypus kraatzii|NIESD0465|Ryuhei Ueno|Morphology|BOLD:ACV5726  
 Tanypus kraatzii|LC495089||BOLD:ACV5726  
 Tanypus kraatzii|LC494796||BOLD:ACV5726  
 Tanypus kraatzii|NIESD0487|Ryuhei Ueno|Morphology|BOLD:ACV5726  
 Tanypus kraatzii|LC050916||BOLD:ACV5726  
 Tanypus kraatzii|NIESD0475|Ryuhei Ueno|Morphology|BOLD:ACV5726  
 Tanypus kraatzii|LC495099||BOLD:ACV5726  
 Tanypus kraatzii|LC050917||BOLD:ACV5726  
 Tanypus kraatzii|NIESD0477|Ryuhei Ueno|Morphology|BOLD:ACV5726  
 Tanypus kraatzii|NIESD0493|Ryuhei Ueno|Morphology|BOLD:ACV5726  
 Tanypus kraatzii|LC050915||BOLD:ACV5726  
 Tanypus kraatzii|NIESD0490|Ryuhei Ueno|Morphology|BOLD:ACV5726  
 Tanypus kraatzii|NIESD0489|Ryuhei Ueno|Morphology|BOLD:ACV5726  
 Tanypus kraatzii|NIESD0488|Ryuhei Ueno|Morphology|BOLD:ACV5726  
 Tanypus kraatzii|NIESD0486|Ryuhei Ueno|Morphology|BOLD:ACV5726  
 Tanypus kraatzii|NIESD0474|Ryuhei Ueno|Morphology|BOLD:ACV5726  
 Tanypus kraatzii|LC494949||BOLD:ACV5726  
 Tanypus kraatzii|NIESD0453|Ryuhei Ueno|Morphology|BOLD:ACV5726  
 Tanypus kraatzii|LC050913||BOLD:ACV5726  
 Tanypus kraatzii|LC494777||BOLD:ACV5726  
 Tanypus kraatzii|LC494787||BOLD:ACV5726  
 Tanypus kraatzii|LC494981||BOLD:ACV5726  
 Tanypus sp. FLT1.5|MW283820||BOLD:AAV5949  
 Tanypus neopunctipennis|09BBDIP-1895|Angela Telfer|BIN Taxonomy Match|BOLD:AAL7362  
 Tanypus neopunctipennis|09BBDIP-1897|Angela Telfer|BIN Taxonomy Match|BOLD:AAL7362  
 Tanypus neopunctipennis|09BBDIP-1899|Monica R. Young|BOLD ID Engine Manual|BOLD:AAL7362  
 Tanypus neopunctipennis|09BBDIP-1845|Angela Telfer|BIN Taxonomy Match|BOLD:AAL7362  
 Tanypus neopunctipennis|09BBDIP-1601|Angela Telfer|BIN Taxonomy Match|BOLD:AAL7362  
 Tanypus neopunctipennis|09BBDIP-1898|Angela Telfer|BIN Taxonomy Match|BOLD:AAL7362  
 Tanypus neopunctipennis|09BBDIP-1677|Angela Telfer|BIN Taxonomy Match|BOLD:AAL7362  
 Tanypus neopunctipennis|BIOUG02271-B04|Kate Perez|BIN Taxonomy Match|BOLD:AAL7362  
 Tanypus neopunctipennis|BIOUG07931-C09|Angela Telfer|BIN Taxonomy Match|BOLD:AAL7362  
 Tanypus neopunctipennis|BIOUG08377-E01|Angela Telfer|BIN Taxonomy Match|BOLD:AAL7362  
 Tanypus neopunctipennis|BIOUG07931-E05|Angela Telfer|BIN Taxonomy Match|BOLD:AAL7362  
 Tanypus neopunctipennis|BIOUG07932-F02|Angela Telfer|BIN Taxonomy Match|BOLD:AAL7362  
 Tanypus neopunctipennis|BIOUG07931-F04|Angela Telfer|BIN Taxonomy Match|BOLD:AAL7362  
 Tanypus neopunctipennis|NIESD0140|Ryuhei Ueno|Morphology|BOLD:AAL7362  
 Tanypus neopunctipennis|AB838641||BOLD:AAL7362  
 Tanypus neopunctipennis|NIESD0223|Ryuhei Ueno|Morphology|BOLD:AAL7362  
 Tanypus neopunctipennis|NIESD0222|Ryuhei Ueno|Morphology|BOLD:AAL7362  
 Tanypus neopunctipennis|NIESD0436|Ryuhei Ueno|Morphology|BOLD:AAL7362  
 Tanypus neopunctipennis|BIOUG07924-C02|Angela Telfer|BIN Taxonomy Match|BOLD:AAL7362  
 Tanypus neopunctipennis|09BBDIP-2048|Angela Telfer|BIN Taxonomy Match|BOLD:AAL7362  
 Tanypus neopunctipennis|BIOUG08376-D02|Angela Telfer|BIN Taxonomy Match|BOLD:AAL7362  
 Tanypus sp. TANYPUS|MW283825||BOLD:ACI7407  
 Tanypus|BIOUG06723-B06|Jim M. Moore|BOLD:ACI7407  
 Tanypus vilipennis|BIOUG27479-A05|Kate Perez|BIN Taxonomy Match|BOLD:ACZ5961  
 Tanypus vilipennis|BIOUG27331-E03|Kate Perez|BIN Taxonomy Match|BOLD:ACZ5961  
 Tanypus vilipennis|BIOUG27196-B04|Kate Perez|BIN Taxonomy Match|BOLD:ACZ5961  
 Tanypus vilipennis|ZMUO.025320|Lauri Paasivirta|BOLD:ACZ5961  
 Tanypus vilipennis|ZMUO.025319|Lauri Paasivirta|BOLD:ACZ5961  
 Tanypus vilipennis|BIOUG55116-F04|Kate Perez|BIN Taxonomy Match (Oct 2020)|BOLD:ACZ5961  
 Tanypus punctipennis|JN887100||BOLD:ACB5010  
 Tanypus punctipennis|JN887099||BOLD:ACB5010  
 Tanypus punctipennis|JN887098||BOLD:ACB5010  
 Tanypus punctipennis|OM974447  
 Tanypus punctipennis|IM\_VR30VII\_224|Piotr Gadawski|Morphology|BOLD:ADA5143  
 Tanypus punctipennis|ZMUO.025270|Lauri Paasivirta|BOLD:ADA5143  
 Tanypus punctipennis|ZMUO.025269|Lauri Paasivirta|BOLD:ADA5143  
 Tanypus punctipennis|NHRS-BYWS000000525|Yngve Brodin|morphology|BOLD:ADA5143  
 Tanypus punctipennis|NHRS-BYWS000000524|Yngve Brodin|morphology|BOLD:ADA5143  
 Tanypus punctipennis|NHRS-BYWS000000904|Yngve Brodin|morphology|BOLD:ADA5143  
 Tanypus punctipennis|NHRS-BYWS000000248|Yngve Brodin|morphology|BOLD:ADA5143  
 Tanypus chinensis|KP902839||BOLD:ADC7018  
 Tanypus chinensis|KP902840||BOLD:ADC7018  
 Tanypus chinensis|KP902843||BOLD:ADC7018  
 Tanypus chinensis|KP902841||BOLD:ADC7018  
 Tanypus chinensis|KP902838||BOLD:ADC7018  
 Tanypus chinensis|KP902836||BOLD:ADC7018  
 Tanypus chinensis|KP902837||BOLD:ADC7018  
 Tanypus chinensis|KP902842||BOLD:ADC7018  
 Tanypus nakazatoi|NIESD0015|Ryuhei Ueno|Morphology|BOLD:ACQ0045  
 Tanypus nakazatoi|AB838640||BOLD:ACQ0045

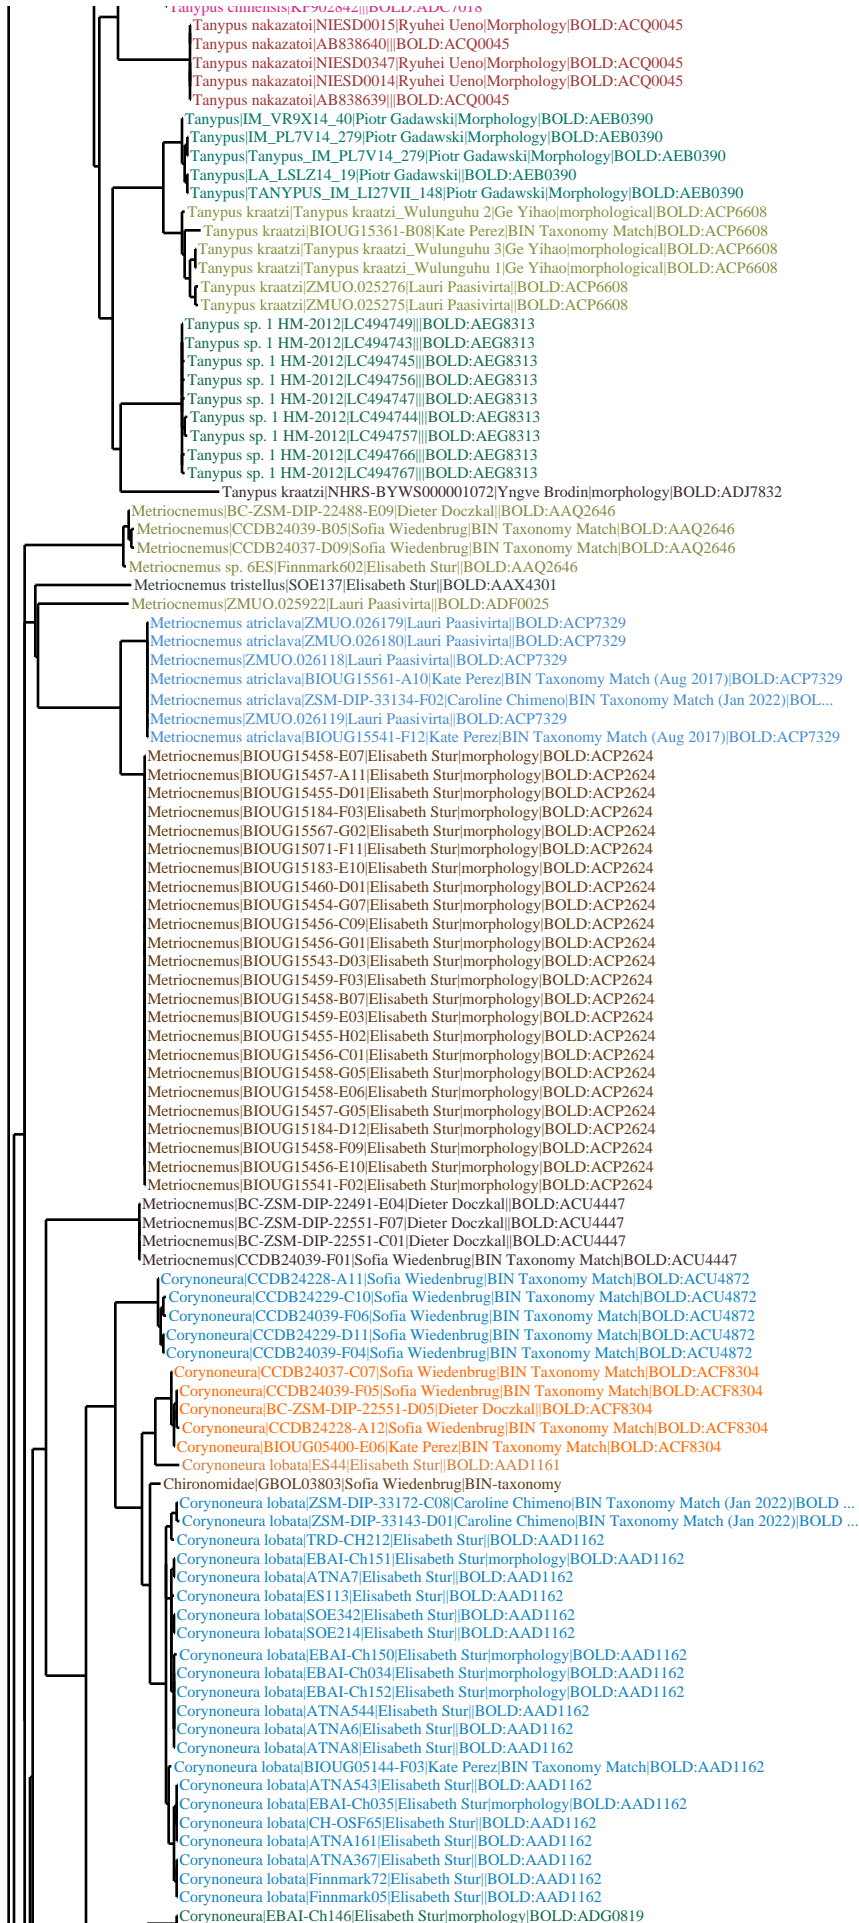

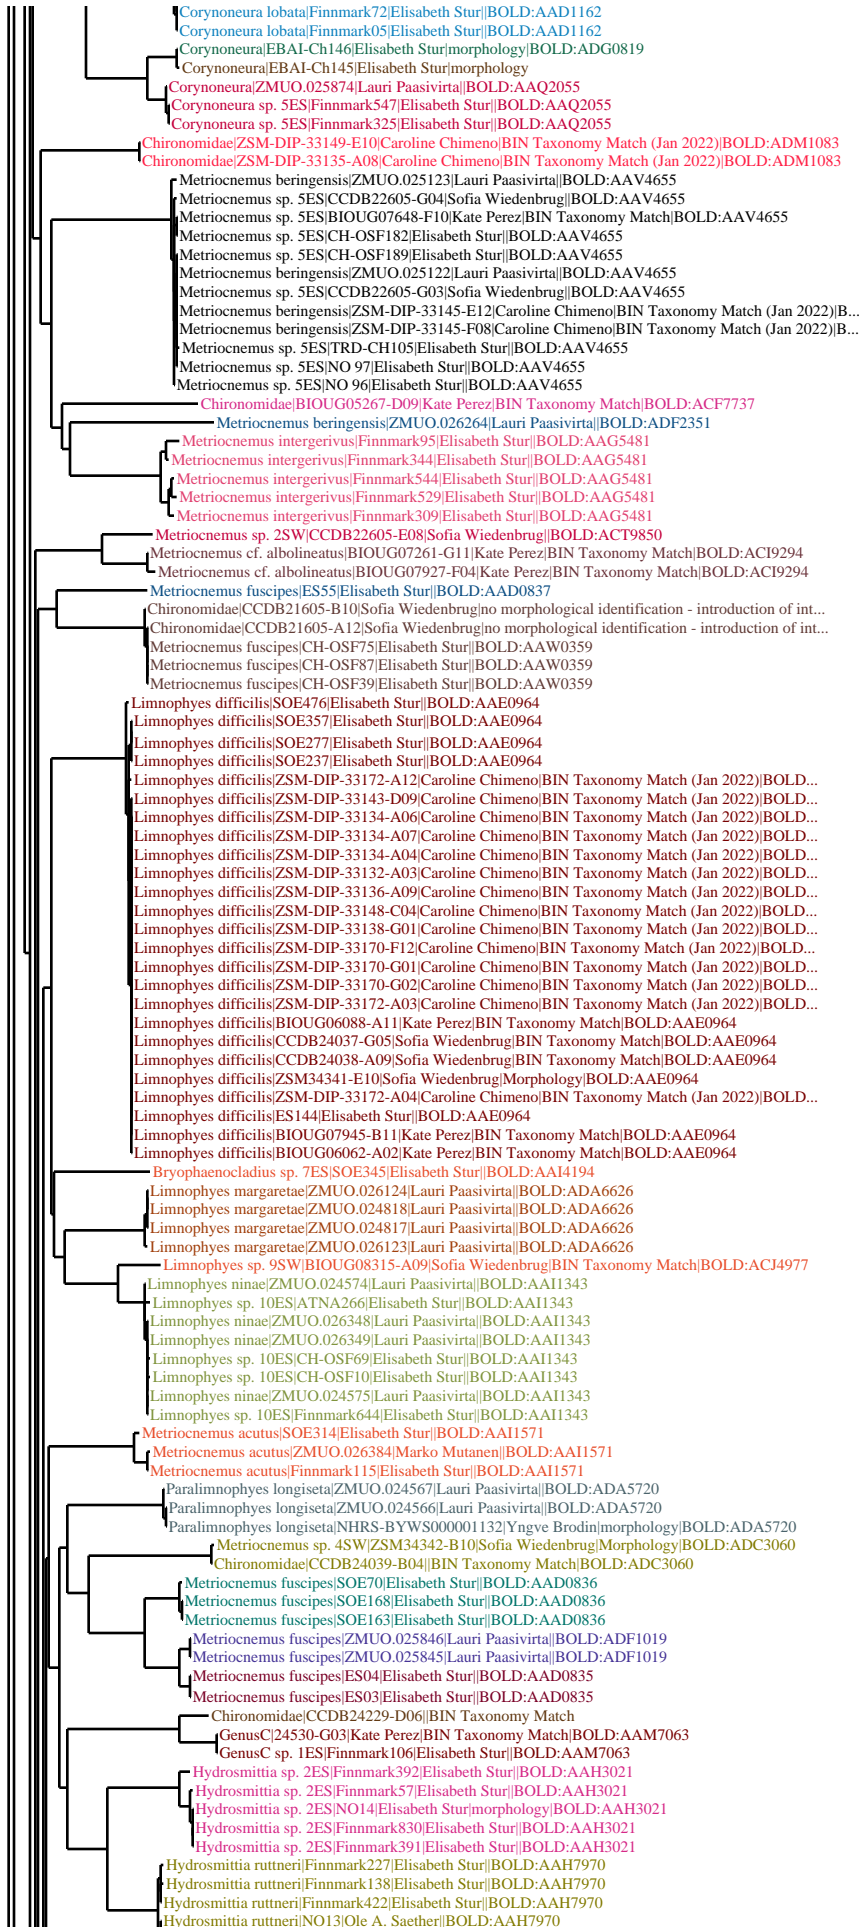

Hydrosmittia ruttneri|Finnmark138|Elisabeth Stur|BOLD:AAH7970  
Hydrosmittia ruttneri|Finnmark422|Elisabeth Stur|BOLD:AAH7970  
Hydrosmittia ruttneri|NO13|Ole A. Saether|BOLD:AAH7970  
Hydrosmittia ruttneri|NO12|Ole A. Saether|BOLD:AAH7970  
Hydrosmittia ruttneri|Finnmark254|Elisabeth Stur|BOLD:AAH7970  
Hydrosmittia ruttneri|Finnmark587|Elisabeth Stur|BOLD:AAH7970  
Metriocnemus|SOE125|Elisabeth Stur|BOLD:AAI1569  
Metriocnemus eurynotus|BIOUG15762-C04|Kate Perez|BIN Taxonomy Match|BOLD:AAB8860  
Metriocnemus eurynotus|ATNA199|Elisabeth Stur|BOLD:AAB8860  
Metriocnemus eurynotus|NHR5-BYWS00000549|Yngve Brodin|morphology|BOLD:AAB8860  
Metriocnemus eurynotus|BIOUG15765-E08|Kate Perez|BIN Taxonomy Match|BOLD:AAB8860  
Metriocnemus eurynotus|BIOUG15948-E11|Kate Perez|BIN Taxonomy Match|BOLD:AAB8860  
Metriocnemus eurynotus|BIOUG16198-H06|Kate Perez|BIN Taxonomy Match|BOLD:AAB8860  
Metriocnemus eurynotus|BIOUG15675-H10|Kate Perez|BIN Taxonomy Match|BOLD:AAB8860  
Metriocnemus eurynotus|BIOUG04261-E08|Kate Perez|BIN Taxonomy Match|BOLD:AAB8860  
Metriocnemus eurynotus|BIOUG15654-D11|Kate Perez|BIN Taxonomy Match|BOLD:AAB8860  
Metriocnemus eurynotus|BIOUG15769-C08|Kate Perez|BIN Taxonomy Match|BOLD:AAB8860  
Metriocnemus eurynotus|BIOUG15762-E12|Kate Perez|BIN Taxonomy Match|BOLD:AAB8860  
Metriocnemus eurynotus|BIOUG15718-B12|Kate Perez|BIN Taxonomy Match|BOLD:AAB8860  
Metriocnemus ursinus|MZ004970||BOLD:AEH5653  
Metriocnemus|CCDB24038-E12|Sofia Wiedenbrug|BIN Taxonomy Match|BOLD:ACU4659  
Metriocnemus picipes|BC-ZSM-DIP-22488-C03|Sofia Wiedenbrug|BIN Taxonomy Match|BOLD:AAI1570  
Metriocnemus picipes|CCDB24039-G01|Sofia Wiedenbrug|BIN Taxonomy Match|BOLD:AAI1570  
Metriocnemus picipes|CCDB24038-B12|Sofia Wiedenbrug|BIN Taxonomy Match|BOLD:AAI1570  
Metriocnemus picipes|CCDB24039-G04|Sofia Wiedenbrug|BIN Taxonomy Match|BOLD:AAI1570  
Metriocnemus picipes|BC-ZSM-DIP-22488-C04|Sofia Wiedenbrug|BIN Taxonomy Match|BOLD:AAI1570  
Metriocnemus picipes|CCDB24039-G03|Sofia Wiedenbrug|BIN Taxonomy Match|BOLD:AAI1570  
Metriocnemus picipes|CCDB24039-B03|Sofia Wiedenbrug|BIN Taxonomy Match|BOLD:AAI1570  
Metriocnemus picipes|ZSM-DIP-33172-E05|Caroline Chimeno|BIN Taxonomy Match (Jan 2022)|BOLD...  
Metriocnemus picipes|ZSM34342-D09|Sofia Wiedenbrug|Morphology|BOLD:AAI1570  
Metriocnemus picipes|CCDB24038-C02|Sofia Wiedenbrug|BIN Taxonomy Match|BOLD:AAI1570  
Metriocnemus picipes|ZSM34342-B06|Sofia Wiedenbrug|Morphology|BOLD:AAI1570  
Metriocnemus picipes|ZSM34342-A09|Sofia Wiedenbrug|Morphology|BOLD:AAI1570  
Metriocnemus picipes|CCDB24038-C01|Sofia Wiedenbrug|BIN Taxonomy Match|BOLD:AAI1570  
Metriocnemus picipes|CCDB24039-F03|Sofia Wiedenbrug|BIN Taxonomy Match|BOLD:AAI1570  
Metriocnemus picipes|CCDB24038-D02|Sofia Wiedenbrug|BIN Taxonomy Match|BOLD:AAI1570  
Metriocnemus|SOE309|Elisabeth Stur|BOLD:AAI1570  
Metriocnemus picipes|BIOUG15455-H11|Kate Perez|BIN Taxonomy Match|BOLD:AAI1572  
Metriocnemus picipes|BIOUG15071-G11|Kate Perez|BIN Taxonomy Match|BOLD:AAI1572  
Metriocnemus picipes|BIOUG15459-D01|Kate Perez|BIN Taxonomy Match|BOLD:AAI1572  
Metriocnemus picipes|BIOUG42704-B09|Kate Perez|BIN Taxonomy Match below Phylum (Jun 2019)|B...  
Metriocnemus picipes|BIOUG42963-G06|Kate Perez|BIN Taxonomy Match below Phylum (Jun 2019)|B...  
Metriocnemus picipes|BIOUG15675-C01|Kate Perez|BIN Taxonomy Match|BOLD:AAI1572  
Metriocnemus picipes|BIOUG15793-A01|Kate Perez|BIN Taxonomy Match|BOLD:AAI1572  
Metriocnemus picipes|BIOUG15454-A11|Kate Perez|BIN Taxonomy Match|BOLD:AAI1572  
Metriocnemus picipes|BIOUG15458-F04|Kate Perez|BIN Taxonomy Match|BOLD:AAI1572  
Metriocnemus picipes|BIOUG15455-A05|Kate Perez|BIN Taxonomy Match|BOLD:AAI1572  
Chironomidae|BIOUG05144-E09|Kate Perez|no morphological identification - introduction of interim ...  
Metriocnemus picipes|BIOUG15457-C01|Kate Perez|BIN Taxonomy Match|BOLD:AAI1572  
Metriocnemus picipes|BIOUG15454-C02|Kate Perez|BIN Taxonomy Match|BOLD:AAI1572  
Metriocnemus picipes|BIOUG15457-A01|Kate Perez|BIN Taxonomy Match|BOLD:AAI1572  
Metriocnemus picipes|BIOUG17065-B04|Kate Perez|BIN Taxonomy Match|BOLD:AAI1572  
Metriocnemus picipes|BIOUG15201-H11|Kate Perez|BIN Taxonomy Match|BOLD:AAI1572  
Metriocnemus picipes|BIOUG15183-F05|Kate Perez|BIN Taxonomy Match|BOLD:AAI1572  
Metriocnemus picipes|BIOUG15966-B08|Kate Perez|BIN Taxonomy Match|BOLD:AAI1572  
Metriocnemus picipes|ZMUO.024572|Lauri Paasivirta|BOLD:AAI1572  
Metriocnemus picipes|BIOUG15459-A09|Kate Perez|BIN Taxonomy Match|BOLD:AAI1572  
Metriocnemus picipes|BIOUG15201-H06|Kate Perez|BIN Taxonomy Match|BOLD:AAI1572  
Metriocnemus picipes|BIOUG15185-E12|Kate Perez|BIN Taxonomy Match|BOLD:AAI1572  
Metriocnemus picipes|TRD-CH118|Elisabeth Stur|BOLD:AAI1572  
Metriocnemus picipes|BIOUG15538-A04|Kate Perez|BIN Taxonomy Match|BOLD:AAI1572  
Metriocnemus picipes|BIOUG43074-C07|Kate Perez|BIN Taxonomy Match below Phylum (Jun 2019)|B...  
Metriocnemus picipes|BIOUG15792-G01|Kate Perez|BIN Taxonomy Match|BOLD:AAI1572  
Metriocnemus picipes|BIOUG15808-G01|Kate Perez|BIN Taxonomy Match|BOLD:AAI1572  
Metriocnemus picipes|BIOUG15454-B09|Kate Perez|BIN Taxonomy Match|BOLD:AAI1572  
Metriocnemus picipes|BIOUG15798-H04|Kate Perez|BIN Taxonomy Match|BOLD:AAI1572  
Metriocnemus picipes|BIOUG15457-A12|Kate Perez|BIN Taxonomy Match|BOLD:AAI1572  
Metriocnemus picipes|BIOUG15457-C07|Kate Perez|BIN Taxonomy Match|BOLD:AAI1572  
Metriocnemus picipes|BIOUG15948-F08|Kate Perez|BIN Taxonomy Match|BOLD:AAI1572  
Metriocnemus picipes|BIOUG42927-D02|Kate Perez|BIN Taxonomy Match below Phylum (Jun 2019)|B...  
Metriocnemus picipes|BIOUG42700-D10|Kate Perez|BIN Taxonomy Match below Phylum (Jun 2019)|B...  
Metriocnemus picipes|BIOUG42668-A08|Kate Perez|BIN Taxonomy Match below Phylum (Jun 2019)|B...  
Metriocnemus picipes|BIOUG42713-E10|Kate Perez|BIN Taxonomy Match below Phylum (Jun 2019)|B...  
Metriocnemus picipes|ZSM-DIP-33131-H01|Caroline Chimeno|BIN Taxonomy Match (Jan 2022)|BOLD...  
Metriocnemus picipes|BIOUG15460-C08|Kate Perez|BIN Taxonomy Match|BOLD:AAI1572  
Metriocnemus picipes|BIOUG15459-C08|Kate Perez|BIN Taxonomy Match|BOLD:AAI1572  
Metriocnemus picipes|BIOUG15459-B11|Kate Perez|BIN Taxonomy Match|BOLD:AAI1572  
Metriocnemus picipes|BIOUG15454-B04|Kate Perez|BIN Taxonomy Match|BOLD:AAI1572  
Metriocnemus picipes|BIOUG15538-F06|Kate Perez|BIN Taxonomy Match|BOLD:AAI1572  
Metriocnemus picipes|BIOUG15954-D12|Kate Perez|BIN Taxonomy Match|BOLD:AAI1572  
Chironomidae|BIOUG04795-D04|Kate Perez|no morphological identification - introduction of interim ...  
Metriocnemus picipes|BIOUG15463-G09|Kate Perez|BIN Taxonomy Match|BOLD:AAI1572  
Metriocnemus picipes|RIN\_CH08|Mona Renate Saurasunet|BOLD Identification engine|BOLD:AAI1572  
Metriocnemus picipes|BIOUG42964-A02|Kate Perez|BIN Taxonomy Match below Phylum (Jun 2019)|B...  
Metriocnemus picipes|ZSM-DIP-33141-G08|Caroline Chimeno|BIN Taxonomy Match (Jan 2022)|BOLD...  
Chironomidae|CCDB24039-B06|Sofia Wiedenbrug|no morphological identification - introduction of int...  
Metriocnemus picipes|BIOUG15807-E04|Kate Perez|BIN Taxonomy Match|BOLD:AAI1572  
Metriocnemus picipes|BIOUG15458-A10|Kate Perez|BIN Taxonomy Match|BOLD:AAI1572  
Metriocnemus picipes|BIOUG15201-G10|Kate Perez|BIN Taxonomy Match|BOLD:AAI1572  
Metriocnemus picipes|BIOUG15806-A03|Kate Perez|BIN Taxonomy Match|BOLD:AAI1572  
Metriocnemus picipes|BIOUG15454-G09|Kate Perez|BIN Taxonomy Match|BOLD:AAI1572  
Metriocnemus picipes|BIOUG15458-B03|Kate Perez|BIN Taxonomy Match|BOLD:AAI1572  
Metriocnemus picipes|BIOUG15457-A03|Kate Perez|BIN Taxonomy Match|BOLD:AAI1572  
Metriocnemus picipes|BIOUG15460-B05|Kate Perez|BIN Taxonomy Match|BOLD:AAI1572  
Metriocnemus picipes|BIOUG15455-A01|Kate Perez|BIN Taxonomy Match|BOLD:AAI1572  
Metriocnemus picipes|BIOUG15967-C06|Kate Perez|BIN Taxonomy Match|BOLD:AAI1572  
Metriocnemus picipes|BIOUG15947-G06|Kate Perez|BIN Taxonomy Match|BOLD:AAI1572  
Metriocnemus picipes|BIOUG15183-C04|Kate Perez|BIN Taxonomy Match|BOLD:AAI1572  
Metriocnemus picipes|BIOUG15564-F11|Kate Perez|BIN Taxonomy Match|BOLD:AAI1572  
Metriocnemus picipes|BIOUG15795-B08|Kate Perez|BIN Taxonomy Match|BOLD:AAI1572  
Metriocnemus picipes|BIOUG15806-D03|Kate Perez|BIN Taxonomy Match|BOLD:AAI1572  
Metriocnemus picipes|BIOUG15456-A10|Kate Perez|BIN Taxonomy Match|BOLD:AAI1572  
Metriocnemus picipes|BIOUG15456-B08|Kate Perez|BIN Taxonomy Match|BOLD:AAI1572

Metriocnemus picipes|BIOUG15806-D03|Kate Perez|BIN Taxonomy Match|BOLD:AAI1572  
Metriocnemus picipes|BIOUG15456-A10|Kate Perez|BIN Taxonomy Match|BOLD:AAI1572  
Metriocnemus picipes|CH-eik56|Elisabeth Stur|BOLD:AAI1572  
Metriocnemus picipes|BIOUG15458-G02|Kate Perez|BIN Taxonomy Match|BOLD:AAI1572  
Metriocnemus picipes|BIOUG17022-B11|Kate Perez|BIN Taxonomy Match|BOLD:AAI1572  
Metriocnemus picipes|BIOUG15183-F01|Kate Perez|BIN Taxonomy Match|BOLD:AAI1572  
Metriocnemus picipes|BIOUG15966-C05|Kate Perez|BIN Taxonomy Match|BOLD:AAI1572  
Metriocnemus picipes|CH-eik80|Elisabeth Stur|BOLD:AAI1572  
Metriocnemus picipes|BIOUG04261-F09|Kate Perez|BIN Taxonomy Match|BOLD:AAI1572  
Metriocnemus picipes|BIOUG15808-F06|Kate Perez|BIN Taxonomy Match|BOLD:AAI1572  
Metriocnemus picipes|BIOUG15544-C03|Kate Perez|BIN Taxonomy Match|BOLD:AAI1572  
Metriocnemus picipes|BIOUG15963-B08|Kate Perez|BIN Taxonomy Match|BOLD:AAI1572  
Metriocnemus picipes|BIOUG15720-F06|Kate Perez|BIN Taxonomy Match|BOLD:AAI1572  
Chironomidae|CCDB24228-F12|Sofia Wiedenbrug|no morphological identification - introduction of int...  
Metriocnemus picipes|BIOUG15949-F08|Kate Perez|BIN Taxonomy Match|BOLD:AAI1572  
Metriocnemus picipes|BIOUG42930-D11|Kate Perez|BIN Taxonomy Match below Phylum (Jun 2019)|B...  
Metriocnemus picipes|BIOUG42700-E11|Kate Perez|BIN Taxonomy Match below Phylum (Jun 2019)|B...  
Metriocnemus picipes|BIOUG42666-C07|Kate Perez|BIN Taxonomy Match below Phylum (Jun 2019)|B...  
Metriocnemus picipes|BIOUG43076-F06|Kate Perez|BIN Taxonomy Match below Phylum (Jun 2019)|B...  
Metriocnemus picipes|BIOUG42477-F03|Kate Perez|BIN Taxonomy Match below Phylum (Jun 2019)|B...  
Chironomidae|BIOUG05102-F10|Kate Perez|no morphological identification - introduction of interim ...  
Chironomidae|CCDB24037-F03|Sofia Wiedenbrug|no morphological identification - introduction of int...  
Chironomidae|CCDB24038-D01|Sofia Wiedenbrug|no morphological identification - introduction of int...  
Chironomidae|BC-ZSM-DIP-24208-C02|Dieter Doczkal|no morphological identification - introduction o...  
Chironomidae|BC-ZSM-DIP-22491-D10|Dieter Doczkal|no morphological identification - introduction o...  
Chironomidae|CCDB24229-F05|Sofia Wiedenbrug|no morphological identification - introduction of int...  
Chironomidae|CCDB24229-D03|Sofia Wiedenbrug|no morphological identification - introduction of int...  
Chironomidae|CCDB24229-G01|Sofia Wiedenbrug|no morphological identification - introduction of int...  
Chironomidae|CCDB24037-D11|Sofia Wiedenbrug|no morphological identification - introduction of int...  
Chironomidae|BC-ZSM-DIP-22491-D09|Dieter Doczkal|no morphological identification - introduction o...  
Metriocnemus picipes|BIOUG15953-F05|Kate Perez|BIN Taxonomy Match|BOLD:AAI1572  
Chironomidae|BIOUG05104-E04|Kate Perez|no morphological identification - introduction of interim ...  
Chironomidae|BIOUG05106-F10|Kate Perez|no morphological identification - introduction of interim ...  
Metriocnemus picipes|BIOUG15454-A02|Kate Perez|BIN Taxonomy Match|BOLD:AAI1572  
Metriocnemus picipes|BIOUG15464-A03|Kate Perez|BIN Taxonomy Match|BOLD:AAI1572  
Metriocnemus picipes|TRD-CH116|Elisabeth Stur|BOLD:AAI1572  
Metriocnemus picipes|CH-eik58|Elisabeth Stur|BOLD:AAI1572  
Metriocnemus picipes|BIOUG42755-G04|Kate Perez|BIN Taxonomy Match below Phylum (Jun 2019)|B...  
Metriocnemus picipes|BIOUG15795-E09|Kate Perez|BIN Taxonomy Match|BOLD:AAI1572  
Metriocnemus picipes|BIOUG15454-E12|Kate Perez|BIN Taxonomy Match|BOLD:AAI1572  
Metriocnemus picipes|BIOUG15184-F11|Kate Perez|BIN Taxonomy Match|BOLD:AAI1572  
Metriocnemus picipes|BIOUG15183-F07|Kate Perez|BIN Taxonomy Match|BOLD:AAI1572  
Metriocnemus picipes|BIOUG15456-F03|Kate Perez|BIN Taxonomy Match|BOLD:AAI1572  
Metriocnemus picipes|BIOUG15852-E09|Kate Perez|BIN Taxonomy Match|BOLD:AAI1572  
Metriocnemus picipes|BIOUG15457-C04|Kate Perez|BIN Taxonomy Match|BOLD:AAI1572  
Metriocnemus picipes|BIOUG15458-G08|Kate Perez|BIN Taxonomy Match|BOLD:AAI1572  
Metriocnemus picipes|BIOUG15455-D09|Kate Perez|BIN Taxonomy Match|BOLD:AAI1572  
Metriocnemus picipes|BIOUG16198-G07|Kate Perez|BIN Taxonomy Match|BOLD:AAI1572  
Metriocnemus picipes|BIOUG15963-H06|Kate Perez|BIN Taxonomy Match|BOLD:AAI1572  
Metriocnemus picipes|BIOUG15454-D03|Kate Perez|BIN Taxonomy Match|BOLD:AAI1572  
Metriocnemus picipes|BIOUG15201-H03|Kate Perez|BIN Taxonomy Match|BOLD:AAI1572  
Metriocnemus picipes|BIOUG15963-H09|Kate Perez|BIN Taxonomy Match|BOLD:AAI1572  
Metriocnemus picipes|BIOUG15460-D10|Kate Perez|BIN Taxonomy Match|BOLD:AAI1572  
Metriocnemus picipes|BIOUG15458-A03|Kate Perez|BIN Taxonomy Match|BOLD:AAI1572  
Metriocnemus picipes|BIOUG15455-D02|Kate Perez|BIN Taxonomy Match|BOLD:AAI1572  
Metriocnemus picipes|BIOUG15565-C11|Kate Perez|BIN Taxonomy Match|BOLD:AAI1572  
Metriocnemus picipes|BIOUG15460-G12|Kate Perez|BIN Taxonomy Match|BOLD:AAI1572  
Metriocnemus picipes|BIOUG15459-E08|Kate Perez|BIN Taxonomy Match|BOLD:AAI1572  
Metriocnemus picipes|BIOUG15459-H11|Kate Perez|BIN Taxonomy Match|BOLD:AAI1572  
Metriocnemus picipes|BIOUG15460-B04|Kate Perez|BIN Taxonomy Match|BOLD:AAI1572  
Metriocnemus picipes|BIOUG15950-B04|Kate Perez|BIN Taxonomy Match|BOLD:AAI1572  
Metriocnemus picipes|BIOUG42932-F04|Kate Perez|BIN Taxonomy Match below Phylum (Jun 2019)|B...  
Metriocnemus picipes|BIOUG15794-H11|Kate Perez|BIN Taxonomy Match|BOLD:AAI1572  
Metriocnemus picipes|BIOUG15948-D07|Kate Perez|BIN Taxonomy Match|BOLD:AAI1572  
Metriocnemus picipes|BIOUG42666-F01|Kate Perez|BIN Taxonomy Match below Phylum (Jun 2019)|B...  
Metriocnemus picipes|BIOUG42964-A11|Kate Perez|BIN Taxonomy Match below Phylum (Jun 2019)|B...  
Chironomidae|BIOUG16894-A04|Kate Perez|no morphological identification - introduction of interim ...  
Metriocnemus picipes|BIOUG15791-F11|Kate Perez|BIN Taxonomy Match|BOLD:AAI1572  
Metriocnemus picipes|BIOUG16330-A09|Kate Perez|BIN Taxonomy Match|BOLD:AAI1572  
Metriocnemus picipes|Finmark02|Elisabeth Stur|BOLD:AAI1572  
Metriocnemus picipes|CH-OSF03|Elisabeth Stur|BOLD:AAI1572  
Metriocnemus picipes|RIN\_CH95|Mona Renate Saurasmet|BOLD Identification engine|BOLD:AAI1572  
Metriocnemus picipes|CH-eik108|Elisabeth Stur|BOLD:AAI1572  
Metriocnemus picipes|ZMUO.024573|Lauri Paasivirta|BOLD:AAI1572  
Metriocnemus picipes|BIOUG15458-E01|Kate Perez|BIN Taxonomy Match|BOLD:AAI1572  
Metriocnemus picipes|BIOUG42787-E08|Kate Perez|BIN Taxonomy Match below Phylum (Jun 2019)|B...  
Metriocnemus picipes|BIOUG15454-F08|Kate Perez|BIN Taxonomy Match|BOLD:AAI1572  
Metriocnemus picipes|BIOUG15184-B09|Kate Perez|BIN Taxonomy Match|BOLD:AAI1572  
Metriocnemus picipes|BIOUG15185-C11|Kate Perez|BIN Taxonomy Match|BOLD:AAI1572  
Metriocnemus picipes|BIOUG15807-E10|Kate Perez|BIN Taxonomy Match|BOLD:AAI1572  
Metriocnemus picipes|BIOUG15792-C04|Kate Perez|BIN Taxonomy Match|BOLD:AAI1572  
Metriocnemus picipes|BIOUG15561-A08|Kate Perez|BIN Taxonomy Match|BOLD:AAI1572  
Metriocnemus picipes|BIOUG15963-G06|Kate Perez|BIN Taxonomy Match|BOLD:AAI1572  
Metriocnemus picipes|BIOUG15963-D11|Kate Perez|BIN Taxonomy Match|BOLD:AAI1572  
Metriocnemus picipes|BIOUG15454-A04|Kate Perez|BIN Taxonomy Match|BOLD:AAI1572  
Metriocnemus picipes|BIOUG15457-G08|Kate Perez|BIN Taxonomy Match|BOLD:AAI1572  
Metriocnemus picipes|BIOUG15459-G08|Kate Perez|BIN Taxonomy Match|BOLD:AAI1572  
Metriocnemus picipes|BIOUG15456-A11|Kate Perez|BIN Taxonomy Match|BOLD:AAI1572  
Metriocnemus picipes|BIOUG15456-C03|Kate Perez|BIN Taxonomy Match|BOLD:AAI1572  
Metriocnemus picipes|BIOUG16477-D04|Kate Perez|BIN Taxonomy Match|BOLD:AAI1572  
Metriocnemus picipes|BIOUG15454-A03|Kate Perez|BIN Taxonomy Match|BOLD:AAI1572  
Metriocnemus picipes|BIOUG15809-F06|Kate Perez|BIN Taxonomy Match|BOLD:AAI1572  
Metriocnemus picipes|BIOUG15457-H02|Kate Perez|BIN Taxonomy Match|BOLD:AAI1572  
Metriocnemus picipes|ATNA362|Elisabeth Stur|BOLD:AAI1572  
Metriocnemus picipes|BIOUG15201-G09|Kate Perez|BIN Taxonomy Match|BOLD:AAI1572  
Metriocnemus picipes|BIOUG15459-G09|Kate Perez|BIN Taxonomy Match|BOLD:AAI1572  
Metriocnemus picipes|BIOUG04261-E09|Kate Perez|BIN Taxonomy Match|BOLD:AAI1572  
Metriocnemus picipes|BIOUG15950-E07|Kate Perez|BIN Taxonomy Match|BOLD:AAI1572  
Metriocnemus picipes|BIOUG15538-F08|Kate Perez|BIN Taxonomy Match|BOLD:AAI1572  
Metriocnemus picipes|BIOUG15458-B05|Kate Perez|BIN Taxonomy Match|BOLD:AAI1572  
Metriocnemus picipes|BIOUG15458-E02|Kate Perez|BIN Taxonomy Match|BOLD:AAI1572  
Metriocnemus picipes|BIOUG04433-H09|Kate Perez|BIN Taxonomy Match|BOLD:AAI1572





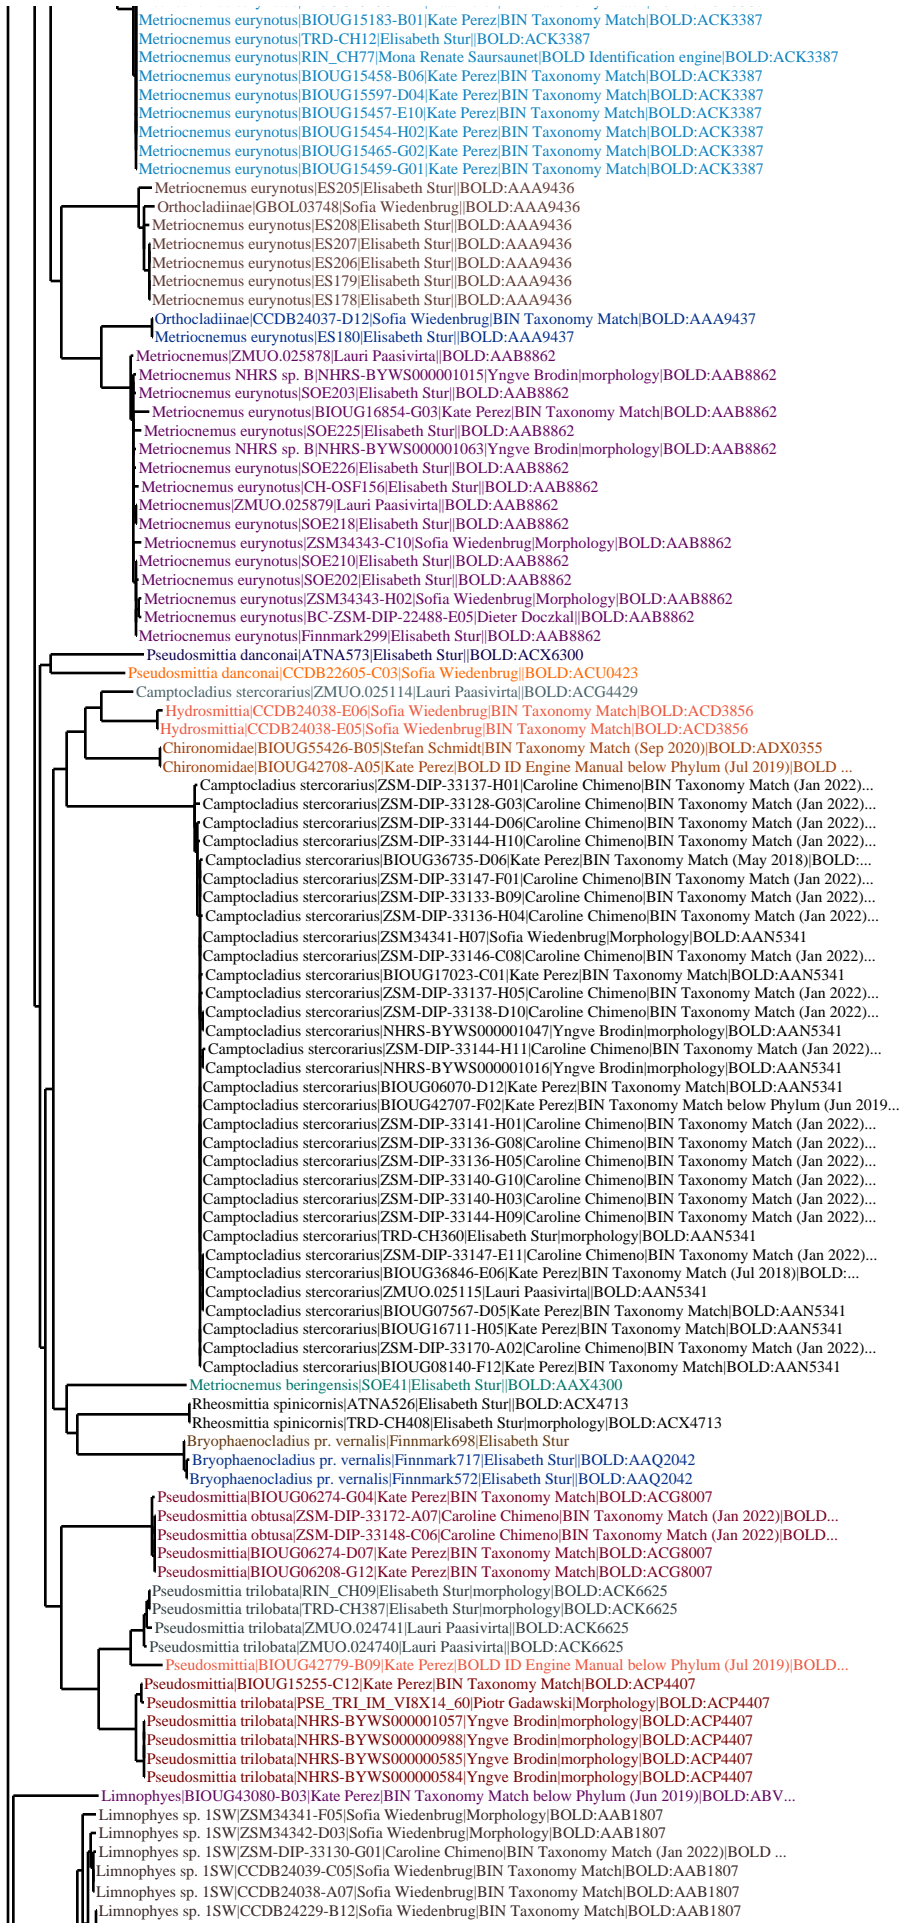



Limnophyes sp. 1SW/CCDB24038-A07|Sofia Wiedenbrug|BIN Taxonomy Match|BOLD:AAB1807  
 Limnophyes sp. 1SW/CCDB24229-B12|Sofia Wiedenbrug|BIN Taxonomy Match|BOLD:AAB1807  
 Limnophyes sp. 1SW/CCDB24229-F11|Sofia Wiedenbrug|BIN Taxonomy Match|BOLD:AAB1807  
 Limnophyes sp. 1SW/ZSM34342-B05|Sofia Wiedenbrug|Morphology|BOLD:AAB1807  
 Limnophyes sp. 1SW/ZSM34342-B04|Sofia Wiedenbrug|Morphology|BOLD:AAB1807  
 Limnophyes sp. 1SW/BC-ZSM-DIP-22488-G05|Dieter Doczkal|BIN Taxonomy Match|BOLD:AAB1807  
 Limnophyes sp. 1SW/CCDB24039-H08|Sofia Wiedenbrug|BIN Taxonomy Match|BOLD:AAB1807  
 Limnophyes sp. 1SW/CCDB24037-C01|Sofia Wiedenbrug|BIN Taxonomy Match|BOLD:AAB1807  
 Limnophyes sp. 1SW/CCDB24039-C04|Sofia Wiedenbrug|BIN Taxonomy Match|BOLD:AAB1807  
 Limnophyes sp. 1SW/ZSM34342-B02|Sofia Wiedenbrug|Morphology|BOLD:AAB1807  
 Limnophyes sp. 1SW/CCDB24228-G07|Sofia Wiedenbrug|BIN Taxonomy Match|BOLD:AAB1807  
 Limnophyes sp. 1SW/ZSM34342-H04|Sofia Wiedenbrug|Morphology  
 Limnophyes sp. 1SW/CCDB21606-C03|Sofia Wiedenbrug|BOLD:AAB1807  
 Limnophyes sp. 1SW/CCDB21606-D07|Sofia Wiedenbrug|BOLD:AAB1807  
 Limnophyes sp. 1SW/ZSM34342-H05|Sofia Wiedenbrug|Morphology|BOLD:AAB1807  
 Limnophyes sp. 1SW/CCDB24229-F02|Sofia Wiedenbrug|BIN Taxonomy Match|BOLD:AAB1807  
 Limnophyes sp. 1SW/CCDB21606-D08|Sofia Wiedenbrug|BOLD:AAB1807  
 Limnophyes sp. 1SW/CCDB21606-D05|Sofia Wiedenbrug|BOLD:AAB1807  
 Chironomidae|CCDB22603-D01|Sofia Wiedenbrug|no morphological identification - introduction of int...  
 Chironomidae|CCDB22603-D05|Sofia Wiedenbrug|no morphological identification - introduction of int...  
 Chironomidae|CCDB22603-C08|Sofia Wiedenbrug|no morphological identification - introduction of int...  
 Chironomidae|CCDB22603-A09|Sofia Wiedenbrug|no morphological identification - introduction of int...  
 Chironomidae|CCDB22603-F10|Sofia Wiedenbrug|no morphological identification - introduction of int...  
 Chironomidae|CCDB22603-F06|Sofia Wiedenbrug|no morphological identification - introduction of int...  
 Chironomidae|CCDB22603-D06|Sofia Wiedenbrug|no morphological identification - introduction of int...  
 Chironomidae|CCDB22603-E05|Sofia Wiedenbrug|no morphological identification - introduction of int...  
 Chironomidae|CCDB22603-D04|Sofia Wiedenbrug|no morphological identification - introduction of int...  
 Chironomidae|CCDB22603-C12|Sofia Wiedenbrug|no morphological identification - introduction of int...  
 Chironomidae|CCDB22603-C07|Sofia Wiedenbrug|no morphological identification - introduction of int...  
 Chironomidae|CCDB22603-E04|Sofia Wiedenbrug|no morphological identification - introduction of int...  
 Chironomidae|CCDB22603-A02|Sofia Wiedenbrug|no morphological identification - introduction of int...  
 Limnophyes sp. 1SW/CCDB24039-B12|Sofia Wiedenbrug|BIN Taxonomy Match  
 Limnophyes sp. 1SW/CCDB24037-G07|Sofia Wiedenbrug|BIN Taxonomy Match|BOLD:AAB1807  
 Limnophyes sp. 1SW/CCDB24228-B11|Sofia Wiedenbrug|BIN Taxonomy Match|BOLD:AAB1807  
 Limnophyes sp. 1SW/ZSM34342-C08|Sofia Wiedenbrug|Morphology|BOLD:AAB1807  
 Limnophyes sp. 1SW/CCDB24038-F09|Sofia Wiedenbrug|BIN Taxonomy Match|BOLD:AAB1807  
 Limnophyes sp. 1SW/BC-ZSM-DIP-22488-D10|Dieter Doczkal|BIN Taxonomy Match|BOLD:AAB1807  
 Limnophyes sp. 1SW/BC-ZSM-DIP-22488-G12|Dieter Doczkal|BIN Taxonomy Match|BOLD:AAB1807  
 Limnophyes sp. 1SW/CCDB24038-F10|Sofia Wiedenbrug|BIN Taxonomy Match|BOLD:AAB1807  
 Limnophyes sp. 1SW/CCDB24229-E11|Sofia Wiedenbrug|BIN Taxonomy Match|BOLD:AAB1807  
 Limnophyes sp. 1SW/CCDB24228-B12|Sofia Wiedenbrug|BIN Taxonomy Match|BOLD:AAB1807  
 Limnophyes sp. 1SW/BC-ZSM-DIP-22488-D03|Dieter Doczkal|BIN Taxonomy Match|BOLD:AAB1807  
 Limnophyes sp. 1SW/BC-ZSM-DIP-22488-H03|Dieter Doczkal|BIN Taxonomy Match|BOLD:AAB1807  
 Limnophyes sp. 1SW/ZSM34342-H08|Sofia Wiedenbrug|Morphology|BOLD:AAB1807  
 Limnophyes sp. 1SW/CCDB24037-G08|Sofia Wiedenbrug|BIN Taxonomy Match|BOLD:AAB1807  
 Limnophyes sp. 1SW/CCDB24039-C03|Sofia Wiedenbrug|BIN Taxonomy Match|BOLD:AAB1807  
 Limnophyes sp. 1SW/BC-ZSM-DIP-22488-G08|Dieter Doczkal|BIN Taxonomy Match|BOLD:AAB1807  
 Limnophyes sp. 1SW/CCDB24228-B03|Sofia Wiedenbrug|BIN Taxonomy Match|BOLD:AAB1807  
 Limnophyes sp. 1SW/ZSM34342-F09|Sofia Wiedenbrug|Morphology|BOLD:AAB1807  
 Limnophyes sp. 1SW/ZSM34342-F10|Sofia Wiedenbrug|Morphology|BOLD:AAB1807  
 Limnophyes sp. 1SW/CCDB24228-B04|Sofia Wiedenbrug|BIN Taxonomy Match|BOLD:AAB1807  
 Limnophyes sp. 1SW/BC-ZSM-DIP-22488-H06|Dieter Doczkal|BIN Taxonomy Match|BOLD:AAB1807  
 Limnophyes sp. 1SW/CCDB24229-D02|Sofia Wiedenbrug|BIN Taxonomy Match|BOLD:AAB1807  
 Limnophyes sp. 1SW/CCDB24038-F07|Sofia Wiedenbrug|BIN Taxonomy Match|BOLD:AAB1807  
 Limnophyes sp. 1SW/ZSM34342-E04|Sofia Wiedenbrug|Morphology|BOLD:AAB1807  
 Limnophyes sp. 1SW/ZSM34342-E08|Sofia Wiedenbrug|Morphology|BOLD:AAB1807  
 Limnophyes sp. 1SW/ZSM34342-H06|Sofia Wiedenbrug|Morphology|BOLD:AAB1807  
 Limnophyes sp. 1SW/ZSM34342-F05|Sofia Wiedenbrug|Morphology|BOLD:AAB1807  
 Limnophyes|25128-F04|Kate Perez|BIN Taxonomy Match (Mar 2018)|BOLD:AAB1807  
 Limnophyes|25129-E01|Kate Perez|BIN Taxonomy Match (Mar 2018)|BOLD:AAB1807  
 Limnophyes|25128-B12|Kate Perez|BIN Taxonomy Match (Mar 2018)|BOLD:AAB1807  
 Limnophyes|25129-G06|Kate Perez|BIN Taxonomy Match (Mar 2018)|BOLD:AAB1807  
 Limnophyes sp. 1ES|SOE320|Elisabeth Stur|BOLD:AAB1807  
 Limnophyes sp. 1ES|SOE59|Elisabeth Stur|BOLD:AAB1807  
 Limnophyes edwardsi|CCDB24183-G07|Sofia Wiedenbrug|Morphology|BOLD:AAB9700  
 Limnophyes edwardsi|CCDB24183-D01|Sofia Wiedenbrug|Morphology|BOLD:AAB9700  
 Limnophyes edwardsi|ZSM-DIP-33135-C12|Caroline Chimenó|BIN Taxonomy Match (Jan 2022)|BOLD ...  
 Limnophyes edwardsi|ZSM-DIP-33135-D01|Caroline Chimenó|BIN Taxonomy Match (Jan 2022)|BOLD ...  
 Limnophyes edwardsi|ZSM-DIP-33148-C01|Caroline Chimenó|BIN Taxonomy Match (Jan 2022)|BOLD ...  
 Limnophyes edwardsi|ZSM-DIP-33148-C03|Caroline Chimenó|BIN Taxonomy Match (Jan 2022)|BOLD ...  
 Limnophyes edwardsi|BIOUG05143-H09|Kate Perez|BIN Taxonomy Match|BOLD:AAB9700  
 Limnophyes edwardsi|BIOUG05110-G09|Kate Perez|BIN Taxonomy Match|BOLD:AAB9700  
 Limnophyes edwardsi|SOE193|Elisabeth Stur|BOLD:AAB9700  
 Limnophyes edwardsi|24354-D09|Kate Perez|BIN Taxonomy Match|BOLD:AAB9700  
 Limnophyes edwardsi|ZSM34342-G09|Sofia Wiedenbrug|Morphology|BOLD:AAB9700  
 Limnophyes edwardsi|CCDB24039-B10|Sofia Wiedenbrug|BIN Taxonomy Match|BOLD:AAB9700  
 Limnophyes edwardsi|SOE152|Elisabeth Stur|BOLD:AAB9700  
 Limnophyes edwardsi|SOE375|Elisabeth Stur|BOLD:AAB9700  
 Limnophyes edwardsi|SOE194|Elisabeth Stur|BOLD:AAB9700  
 Limnophyes edwardsi|SOE461|Elisabeth Stur|BOLD:AAB9700  
 Limnophyes edwardsi|SOE330|Elisabeth Stur|BOLD:AAB9700  
 Limnophyes edwardsi|SOE354|Elisabeth Stur|BOLD:AAB9700  
 Limnophyes edwardsi|SOE367|Elisabeth Stur|BOLD:AAB9700  
 Limnophyes edwardsi|ATNA395|Elisabeth Stur|BOLD:AAB9700  
 Limnophyes edwardsi|TRD-CH54|Elisabeth Stur|BOLD:AAB9700  
 Limnophyes edwardsi|ATNA211|Elisabeth Stur|BOLD:AAB9700  
 Limnophyes edwardsi|ATNA214|Elisabeth Stur|BOLD:AAB9700  
 Limnophyes edwardsi|ATNA215|Elisabeth Stur|BOLD:AAB9700  
 Limnophyes edwardsi|SOE313|Elisabeth Stur|BOLD:AAB9700  
 Limnophyes edwardsi|BIOUG15765-G03|Kate Perez|BIN Taxonomy Match|BOLD:AAB9700  
 Limnophyes edwardsi|BIOUG04085-D02|Kate Perez|BIN Taxonomy Match|BOLD:AAB9700  
 Limnophyes edwardsi|SOE472|Elisabeth Stur|BOLD:AAB9700  
 Limnophyes edwardsi|24371-E04|Kate Perez|BIN Taxonomy Match|BOLD:AAB9700  
 Limnophyes edwardsi|ZMUO.025973|Lauri Paasivirta|BOLD:AAB9700  
 Limnophyes edwardsi|SOE436|Elisabeth Stur|BOLD:AAB9700  
 Limnophyes edwardsi|Finmark322|Elisabeth Stur|BOLD:AAB9700  
 Limnophyes edwardsi|Finmark300|Elisabeth Stur|BOLD:AAB9700  
 Limnophyes edwardsi|Finmark273|Elisabeth Stur|BOLD:AAB9700  
 Limnophyes|ZSM-DIP-33133-B10|Caroline Chimenó|BIN Taxonomy Match (Jan 2022)|BOLD:ABW5528  
 Limnophyes|ZSM-DIP-33146-E02|Caroline Chimenó|BIN Taxonomy Match (Jan 2022)|BOLD:ABW5528  
 Limnophyes|BIOUG16707-C07|Kate Perez|BIN Taxonomy Match|BOLD:ABW5528  
 Limnophyes|ZSM-DIP-33135-B09|Caroline Chimenó|BIN Taxonomy Match (Jan 2022)|BOLD:ABW5528

Limnophyes|ZSM-DIP-33140-E02|Caroline Chimenjo|BIN Taxonomy Match (Jan 2022)|BOLD:ABW5528  
Limnophyes|BIOUG16707-C07|Kate Perez|BIN Taxonomy Match|BOLD:ABW5528  
Limnophyes|ZSM-DIP-33135-B09|Caroline Chimenjo|BIN Taxonomy Match (Jan 2022)|BOLD:ABW5528  
Limnophyes|ZSM-DIP-33144-D02|Caroline Chimenjo|BIN Taxonomy Match (Jan 2022)|BOLD:ABW5528  
Limnophyes|ZSM-DIP-33140-B06|Caroline Chimenjo|BIN Taxonomy Match (Jan 2022)|BOLD:ABW5528  
Limnophyes|BIOUG42730-E01|Kate Perez|BIN Taxonomy Match below Phylum (Jun 2019)|BOLD:ABW...  
Limnophyes|ZSM-DIP-33137-H07|Caroline Chimenjo|BIN Taxonomy Match (Jan 2022)|BOLD:ABW5528  
Limnophyes|ZSM-DIP-33133-G11|Caroline Chimenjo|BIN Taxonomy Match (Jan 2022)|BOLD:ABW5528  
Limnophyes|ZSM-DIP-33140-F05|Caroline Chimenjo|BIN Taxonomy Match (Jan 2022)|BOLD:ABW5528  
Limnophyes|ZSM-DIP-33135-B05|Caroline Chimenjo|BIN Taxonomy Match (Jan 2022)|BOLD:ABW5528  
Limnophyes|ZSM-DIP-33135-B07|Caroline Chimenjo|BIN Taxonomy Match (Jan 2022)|BOLD:ABW5528  
Limnophyes|BIOUG55147-G01|Stefan Schmidt|BIN Taxonomy Match (Sep 2020)|BOLD:ABW5528  
Limnophyes|ZSM-DIP-33133-B12|Caroline Chimenjo|BIN Taxonomy Match (Jan 2022)|BOLD:ABW5528  
Limnophyes|ZSM-DIP-33133-C01|Caroline Chimenjo|BIN Taxonomy Match (Jan 2022)|BOLD:ABW5528  
Limnophyes|ZSM-DIP-33133-C02|Caroline Chimenjo|BIN Taxonomy Match (Jan 2022)|BOLD:ABW5528  
Limnophyes|ZSM-DIP-33133-G12|Caroline Chimenjo|BIN Taxonomy Match (Jan 2022)|BOLD:ABW5528  
Limnophyes|ZSM-DIP-33142-H03|Caroline Chimenjo|BIN Taxonomy Match (Jan 2022)|BOLD:ABW5528  
Limnophyes|ZSM-DIP-33144-D03|Caroline Chimenjo|BIN Taxonomy Match (Jan 2022)|BOLD:ABW5528  
Limnophyes|ZSM-DIP-33135-B10|Caroline Chimenjo|BIN Taxonomy Match (Jan 2022)|BOLD:ABW5528  
Limnophyes|ZSM-DIP-33135-B12|Caroline Chimenjo|BIN Taxonomy Match (Jan 2022)|BOLD:ABW5528  
Limnophyes|ZSM-DIP-33136-H02|Caroline Chimenjo|BIN Taxonomy Match (Jan 2022)|BOLD:ABW5528  
Limnophyes|ZSM-DIP-33136-H09|Caroline Chimenjo|BIN Taxonomy Match (Jan 2022)|BOLD:ABW5528  
Limnophyes|ZSM-DIP-33137-H09|Caroline Chimenjo|BIN Taxonomy Match (Jan 2022)|BOLD:ABW5528  
Limnophyes|ZSM-DIP-33137-H10|Caroline Chimenjo|BIN Taxonomy Match (Jan 2022)|BOLD:ABW5528  
Limnophyes|ZSM-DIP-33138-E01|Caroline Chimenjo|BIN Taxonomy Match (Jan 2022)|BOLD:ABW5528  
Limnophyes|ZSM-DIP-33140-E03|Caroline Chimenjo|BIN Taxonomy Match (Jan 2022)|BOLD:ABW5528  
Limnophyes|ZSM-DIP-33140-E08|Caroline Chimenjo|BIN Taxonomy Match (Jan 2022)|BOLD:ABW5528  
Limnophyes|ZSM-DIP-33140-E09|Caroline Chimenjo|BIN Taxonomy Match (Jan 2022)|BOLD:ABW5528  
Limnophyes|ZSM-DIP-33140-E10|Caroline Chimenjo|BIN Taxonomy Match (Jan 2022)|BOLD:ABW5528  
Limnophyes|ZSM-DIP-33140-E11|Caroline Chimenjo|BIN Taxonomy Match (Jan 2022)|BOLD:ABW5528  
Limnophyes|ZSM-DIP-33140-E12|Caroline Chimenjo|BIN Taxonomy Match (Jan 2022)|BOLD:ABW5528  
Limnophyes|ZSM-DIP-33144-F02|Caroline Chimenjo|BIN Taxonomy Match (Jan 2022)|BOLD:ABW5528  
Limnophyes|ZSM-DIP-33128-B11|Caroline Chimenjo|BIN Taxonomy Match (Jan 2022)|BOLD:ABW5528  
Limnophyes|ZSM-DIP-33128-D01|Caroline Chimenjo|BIN Taxonomy Match (Jan 2022)|BOLD:ABW5528  
Limnophyes|ZSM-DIP-33129-B09|Caroline Chimenjo|BIN Taxonomy Match (Jan 2022)|BOLD:ABW5528  
Limnophyes|ZSM-DIP-33145-A05|Caroline Chimenjo|BIN Taxonomy Match (Jan 2022)|BOLD:ABW5528  
Limnophyes|ZSM-DIP-33145-A06|Caroline Chimenjo|BIN Taxonomy Match (Jan 2022)|BOLD:ABW5528  
Limnophyes|ZSM-DIP-33145-A07|Caroline Chimenjo|BIN Taxonomy Match (Jan 2022)|BOLD:ABW5528  
Limnophyes|ZSM-DIP-33140-F02|Caroline Chimenjo|BIN Taxonomy Match (Jan 2022)|BOLD:ABW5528  
Limnophyes|ZSM-DIP-33137-H11|Caroline Chimenjo|BIN Taxonomy Match (Jan 2022)|BOLD:ABW5528  
Limnophyes|BIOUG16277-E09|Kate Perez|BIN Taxonomy Match|BOLD:ABW5528  
Limnophyes|ZSM-DIP-33133-A12|Caroline Chimenjo|BIN Taxonomy Match (Jan 2022)|BOLD:ABW5528  
Limnophyes|BIOUG17225-H11|Kate Perez|BIN Taxonomy Match|BOLD:ABW5528  
Limnophyes|BIOUG16268-G05|Kate Perez|BIN Taxonomy Match|BOLD:ABW5528  
Limnophyes|BIOUG16277-F07|Kate Perez|BIN Taxonomy Match|BOLD:ABW5528  
Limnophyes|BIOUG16269-G01|Kate Perez|BIN Taxonomy Match|BOLD:ABW5528  
Limnophyes|BIOUG16277-H06|Kate Perez|BIN Taxonomy Match|BOLD:ABW5528  
Limnophyes|BIOUG16351-E09|Kate Perez|BIN Taxonomy Match|BOLD:ABW5528  
Limnophyes|BIOUG16268-G02|Kate Perez|BIN Taxonomy Match|BOLD:ABW5528  
Limnophyes|BIOUG16354-F02|Kate Perez|BIN Taxonomy Match|BOLD:ABW5528  
Limnophyes|BIOUG16783-D09|Kate Perez|BIN Taxonomy Match|BOLD:ABW5528  
Limnophyes|BIOUG16736-B12|Kate Perez|BIN Taxonomy Match|BOLD:ABW5528  
Limnophyes|BIOUG16214-E10|Kate Perez|BIN Taxonomy Match|BOLD:ABW5528  
Limnophyes|BIOUG16529-E07|Kate Perez|BIN Taxonomy Match|BOLD:ABW5528  
Limnophyes|CCDB24229-A09|Sofia Wiedenbrug|BIN Taxonomy Match|BOLD:ACU4663  
Limnophyes|ZSM34341-D11|Sofia Wiedenbrug|Morphology|BOLD:ACU4663  
Limnophyes|CCDB24229-B02|Sofia Wiedenbrug|BIN Taxonomy Match|BOLD:ACU4663  
Limnophyes|CCDB24228-C12|Sofia Wiedenbrug|BIN Taxonomy Match|BOLD:ACU4663  
Limnophyes sp. 6SW|CCDB22605-A05|Sofia Wiedenbrug|BOLD:ACT8783  
Limnophyes sp. 6SW|CCDB24229-D08|Sofia Wiedenbrug|BIN Taxonomy Match|BOLD:ACT8783  
Smittial|ZSM34343-C06|Sofia Wiedenbrug|Morphology  
Limnophyes sp. 13SW|ZSM34343-D06|Sofia Wiedenbrug|Morphology|BOLD:ADC4985  
Limnophyes sp. |ZSM34343-C05|Sofia Wiedenbrug|Morphology|BOLD:ADC4985  
Limnophyes sp. 11SW|BC-ZSM-DIP-22488-D07|Dieter Doczkal|BIN Taxonomy Match|BOLD:ACR9203  
Limnophyes sp. 11SW|CCDB24229-F09|Jerome Moriniere|BIN Taxonomy Match|BOLD:ACR9203  
Limnophyes sp. 11SW|ZSM34343-H10|Jerome Moriniere|BIN Taxonomy Match|BOLD:ACR9203  
Limnophyes sp. 11SW|ZSM34342-E07|Sofia Wiedenbrug|Morphology  
Limnophyes sp. 11SW|CCDB22604-G09|Jerome Moriniere|BIN Taxonomy Match|BOLD:ACR9203  
Limnophyes sp. 11SW|CCDB24229-D12|Jerome Moriniere|BIN Taxonomy Match|BOLD:ACR9203  
Limnophyes sp. 11SW|CCDB24038-F03|Jerome Moriniere|BIN Taxonomy Match|BOLD:ACR9203  
Limnophyes sp. 11SW|BC-ZSM-DIP-22488-D12|Dieter Doczkal|BIN Taxonomy Match|BOLD:ACR9203  
Limnophyes sp. 11SW|BC-ZSM-DIP-22551-D02|Dieter Doczkal|BIN Taxonomy Match|BOLD:ACR9203  
Limnophyes sp. 11SW|CCDB24228-D12|Jerome Moriniere|BIN Taxonomy Match|BOLD:ACR9203  
Limnophyes sp. 11SW|ZSM34342-F02|Sofia Wiedenbrug|Morphology  
Limnophyes sp. 11SW|CCDB24228-A02|Jerome Moriniere|BIN Taxonomy Match|BOLD:ACR9203  
Limnophyes sp. 11SW|CCDB24038-E08|Jerome Moriniere|BIN Taxonomy Match|BOLD:ACR9203  
Limnophyes sp. 11SW|CCDB24037-B06|Jerome Moriniere|BIN Taxonomy Match|BOLD:ACR9203  
Limnophyes sp. 12SW|ZSM34341-F02|Sofia Wiedenbrug|Morphology|BOLD:ACU4070  
Limnophyes sp. 12SW|BC-ZSM-DIP-22488-D09|Dieter Doczkal|BIN Taxonomy Match|BOLD:ACU4070  
Limnophyes sp. 12SW|ZSM34342-F08|Sofia Wiedenbrug|Morphology|BOLD:ACU4070  
Limnophyes sp. 12SW|CCDB24038-C07|Sofia Wiedenbrug|BIN Taxonomy Match|BOLD:ACU4070  
Limnophyes sp. 12SW|ZSM34342-F04|Sofia Wiedenbrug|Morphology|BOLD:ACU4070  
Limnophyes sp. 12SW|BC-ZSM-DIP-22491-H09|Dieter Doczkal|BIN Taxonomy Match|BOLD:ACU4070  
Limnophyes sp. 12SW|BC-ZSM-DIP-22488-H07|Dieter Doczkal|BIN Taxonomy Match|BOLD:ACU4070  
Limnophyes sp. 12SW|BC-ZSM-DIP-22488-G04|Dieter Doczkal|BIN Taxonomy Match|BOLD:ACU4070  
Limnophyes sp. 12SW|CCDB24037-B11|Sofia Wiedenbrug|BIN Taxonomy Match|BOLD:ACU4070  
Limnophyes sp. 4SW|CCDB24037-A11|Jerome Moriniere|BIN Taxonomy Match|BOLD:ACU4225  
Limnophyes sp. 4SW|BC-ZSM-DIP-22551-C09|Dieter Doczkal|BIN Taxonomy Match|BOLD:ACU4225  
Limnophyes sp. 4SW|ZSM34343-B04|Sofia Wiedenbrug|Morphology|BOLD:ACU4225  
Limnophyes sp. 4SW|ZSM34343-B07|Sofia Wiedenbrug|Morphology|BOLD:ACU4225  
Limnophyes sp. 4SW|ZSM34343-E06|Sofia Wiedenbrug|Morphology|BOLD:ACU4225  
Limnophyes sp. 4SW|CCDB24228-G03|Jerome Moriniere|BIN Taxonomy Match|BOLD:ACU4225  
Limnophyes sp. 4SW|CCDB24039-E01|Jerome Moriniere|BIN Taxonomy Match|BOLD:ACU4225  
Limnophyes sp. 4SW|BC-ZSM-DIP-22491-D05|Dieter Doczkal|BIN Taxonomy Match|BOLD:ACU4225  
Limnophyes sp. 4SW|CCDB24228-B10|Sofia Wiedenbrug|BIN Taxonomy Match|BOLD:ACR9428  
Limnophyes sp. 4SW|CCDB21606-H01|Sofia Wiedenbrug|BOLD:ACR9428  
Limnophyes sp. 4SW|CCDB21606-A08|Sofia Wiedenbrug|BOLD:ACR9428  
Limnophyes sp. 4SW|ZSM34341-F09|Sofia Wiedenbrug|Morphology|BOLD:ACR9428  
Limnophyes sp. 4SW|CCDB24039-D12|Sofia Wiedenbrug|BIN Taxonomy Match|BOLD:ACR9428  
Limnophyes sp. 4SW|ZSM34343-F10|Sofia Wiedenbrug|Morphology|BOLD:ACR9428  
Limnophyes sp. 4SW|ZSM34343-G04|Sofia Wiedenbrug|Morphology|BOLD:ACR9428  
Limnophyes sp. 4SW|CCDB24228-D11|Sofia Wiedenbrug|BIN Taxonomy Match|BOLD:ACR9428  
Limnophyes sp. 4SW|CCDB24228-B09|Sofia Wiedenbrug|BIN Taxonomy Match|BOLD:ACR9428

Limnophyes sp. 45W|ZSM34343-G04|Sofia Wiedenbrug|Morphology|BOLD:ACR9428  
Limnophyes sp. 45W|CCDB24228-D11|Sofia Wiedenbrug|BIN Taxonomy Match|BOLD:ACR9428  
Limnophyes sp. 45W|CCDB24228-B09|Sofia Wiedenbrug|BIN Taxonomy Match|BOLD:ACR9428  
Limnophyes sp. 45W|CCDB22604-G06|Sofia Wiedenbrug||BOLD:ACR9428  
Limnophyes sp. 45W|CCDB22605-A07|Sofia Wiedenbrug||BOLD:ACR9428  
Limnophyes sp. 45W|ZSM34342-G03|Sofia Wiedenbrug|Morphology|BOLD:ACR9428  
Limnophyes sp. 45W|BC-ZSM-DIP-22488-E10|Dieter Doczkal||BOLD:ACR9428  
Limnophyes sp. 45W|ZSM34343-F09|Sofia Wiedenbrug|Morphology|BOLD:ACR9428  
Limnophyes sp. 45W|CCDB24228-D08|Sofia Wiedenbrug|BIN Taxonomy Match|BOLD:ACR9428  
Limnophyes sp. 45W|BC-ZSM-DIP-22488-H02|Dieter Doczkal||BOLD:ACR9428  
Limnophyes sp. 45W|CCDB24038-G11|Sofia Wiedenbrug|BIN Taxonomy Match|BOLD:ACR9428  
Limnophyes sp. 45W|CCDB24039-C08|Sofia Wiedenbrug|BIN Taxonomy Match|BOLD:ACR9428  
Limnophyes sp. 45W|CCDB22604-G07|Sofia Wiedenbrug||BOLD:ACR9428  
Limnophyes sp. 45W|CCDB24229-F10|Sofia Wiedenbrug|BIN Taxonomy Match|BOLD:ACR9428  
Limnophyes sp. 45W|ZSM34341-H02|Sofia Wiedenbrug|Morphology|BOLD:ACR9428  
Limnophyes sp. 45W|CCDB22605-A08|Sofia Wiedenbrug||BOLD:ACR9428  
Limnophyes sp. 45W|CCDB22605-A06|Sofia Wiedenbrug||BOLD:ACR9428  
Limnophyes sp. 45W|ZSM34343-A09|Sofia Wiedenbrug|Morphology|BOLD:ACR9428  
Limnophyes sp. 45W|ZSM34343-F05|Sofia Wiedenbrug|Morphology|BOLD:ACR9428  
Limnophyes sp. 45W|BC-ZSM-DIP-22488-H01|Dieter Doczkal||BOLD:ACR9428  
Limnophyes sp. 45W|CCDB24228-A01|Sofia Wiedenbrug|BIN Taxonomy Match|BOLD:ACR9428  
Limnophyes sp. 45W|BC-ZSM-DIP-22488-H08|Dieter Doczkal||BOLD:ACR9428  
Limnophyes cf. bidumus|ZSM34343-D02|Sofia Wiedenbrug||BOLD:ACR9099  
Limnophyes cf. bidumus|CCDB24038-C06|Sofia Wiedenbrug|BIN Taxonomy Match|BOLD:ACR9099  
Limnophyes cf. bidumus|BC-ZSM-DIP-22491-D07|Dieter Doczkal||BOLD:ACR9099  
Limnophyes cf. bidumus|CCDB24229-F03|Sofia Wiedenbrug|BIN Taxonomy Match|BOLD:ACR9099  
Limnophyes cf. bidumus|CCDB24038-A04|Sofia Wiedenbrug|BIN Taxonomy Match|BOLD:ACR9099  
Limnophyes cf. bidumus|BC-ZSM-DIP-22488-F12|Dieter Doczkal||BOLD:ACR9099  
Limnophyes cf. bidumus|BC-ZSM-DIP-22491-H02|Dieter Doczkal||BOLD:ACR9099  
Limnophyes cf. bidumus|CCDB24037-B10|Sofia Wiedenbrug|BIN Taxonomy Match|BOLD:ACR9099  
Limnophyes cf. bidumus|CCDB24038-F12|Sofia Wiedenbrug|BIN Taxonomy Match|BOLD:ACR9099  
Limnophyes cf. bidumus|CCDB24039-C09|Sofia Wiedenbrug|BIN Taxonomy Match|BOLD:ACR9099  
Limnophyes cf. bidumus|CCDB24037-A04|Sofia Wiedenbrug|BIN Taxonomy Match|BOLD:ACR9099  
Limnophyes cf. bidumus|BC-ZSM-DIP-22491-E01|Sofia Wiedenbrug|Morphology|BOLD:ACR9099  
Limnophyes bidumus|ZSM34343-D02|Sofia Wiedenbrug|Morphology  
Limnophyes bidumus|ZSM34343-D05|Sofia Wiedenbrug|Morphology|BOLD:ACU4849  
Limnophyes bidumus|ZSM34343-C12|Sofia Wiedenbrug|Morphology|BOLD:ACU4849  
Limnophyes bidumus|CCDB24038-A10|Sofia Wiedenbrug|BIN Taxonomy Match|BOLD:ACU4849  
Limnophyes bidumus|CCDB24038-A08|Sofia Wiedenbrug|BIN Taxonomy Match|BOLD:ACU4849  
Chironomidae|CCDB24228-B06|Sofia Wiedenbrug|no morphological identification - introduction of int...  
Chironomidae|CCDB24037-C03|Sofia Wiedenbrug|no morphological identification - introduction of int...  
Chironomidae|CCDB22603-H05|Sofia Wiedenbrug|no morphological identification - introduction of int...  
Chironomidae|CCDB22603-G06|Sofia Wiedenbrug|no morphological identification - introduction of int...  
Limnophyes|CCDB22603-F04|Sofia Wiedenbrug||BOLD:ACQ8320  
Limnophyes bidumus|25130-H06|Kate Perez|BOLD ID Engine Manual (Apr 2018)|BOLD:AAJ2138  
Limnophyes bidumus|24372-D07|Kate Perez|BIN Taxonomy Match|BOLD:AAJ2138  
Limnophyes bidumus|25129-B08|Kate Perez|BIN Taxonomy Match (Mar 2018)|BOLD:AAJ2138  
Limnophyes bidumus|25131-D10|Kate Perez|BOLD ID Engine Manual (Apr 2018)|BOLD:AAJ2138  
Limnophyes bidumus|25130-F05|Kate Perez|BOLD ID Engine Manual (Apr 2018)|BOLD:AAJ2138  
Limnophyes bidumus|24354-C11|Kate Perez|BIN Taxonomy Match|BOLD:AAJ2138  
Limnophyes bidumus|24354-C10|Kate Perez|BIN Taxonomy Match|BOLD:AAJ2138  
Limnophyes bidumus|25130-G01|Kate Perez|BOLD ID Engine Manual (Apr 2018)|BOLD:AAJ2138  
Limnophyes bidumus|25132-F08|Kate Perez|BOLD ID Engine Manual (Apr 2018)|BOLD:AAJ2138  
Limnophyes bidumus|25130-C10|Kate Perez|BOLD ID Engine Manual (Apr 2018)|BOLD:AAJ2138  
Limnophyes bidumus|25128-B11|Kate Perez|BIN Taxonomy Match (Mar 2018)|BOLD:AAJ2138  
Limnophyes bidumus|25132-A04|Kate Perez|BOLD ID Engine Manual (Apr 2018)|BOLD:AAJ2138  
Limnophyes bidumus|25129-A12|Kate Perez|BIN Taxonomy Match (Mar 2018)|BOLD:AAJ2138  
Limnophyes bidumus|23975-B04|Kate Perez|BIN Taxonomy Match|BOLD:AAJ2138  
Limnophyes bidumus|SOE462|Elisabeth Sturj|BOLD:AAJ2138  
Limnophyes bidumus|25130-F12|Kate Perez|BOLD ID Engine Manual (Apr 2018)|BOLD:AAJ2138  
Limnophyes bidumus|25130-F01|Kate Perez|BOLD ID Engine Manual (Apr 2018)|BOLD:AAJ2138  
Limnophyes bidumus|25131-D08|Kate Perez|BOLD ID Engine Manual (Apr 2018)|BOLD:AAJ2138  
Limnophyes bidumus|25132-A05|Kate Perez|BOLD ID Engine Manual (Apr 2018)|BOLD:AAJ2138  
Limnophyes bidumus|25132-A07|Kate Perez|BOLD ID Engine Manual (Apr 2018)|BOLD:AAJ2138  
Limnophyes bidumus|25132-C01|Kate Perez|BOLD ID Engine Manual (Apr 2018)|BOLD:AAJ2138  
Limnophyes bidumus|25132-D09|Kate Perez|BOLD ID Engine Manual (Apr 2018)|BOLD:AAJ2138  
Limnophyes bidumus|25132-D10|Kate Perez|BOLD ID Engine Manual (Apr 2018)|BOLD:AAJ2138  
Limnophyes bidumus|25132-G11|Kate Perez|BOLD ID Engine Manual (Apr 2018)|BOLD:AAJ2138  
Limnophyes bidumus|25132-H02|Kate Perez|BOLD ID Engine Manual (Apr 2018)|BOLD:AAJ2138  
Limnophyes bidumus|25130-B03|Kate Perez|BOLD ID Engine Manual (Apr 2018)|BOLD:AAJ2138  
Limnophyes bidumus|25130-D08|Kate Perez|BOLD ID Engine Manual (Apr 2018)|BOLD:AAJ2138  
Limnophyes bidumus|25130-D09|Kate Perez|BOLD ID Engine Manual (Apr 2018)|BOLD:AAJ2138  
Limnophyes bidumus|25130-D11|Kate Perez|BOLD ID Engine Manual (Apr 2018)|BOLD:AAJ2138  
Limnophyes bidumus|25130-E04|Kate Perez|BOLD ID Engine Manual (Apr 2018)|BOLD:AAJ2138  
Limnophyes bidumus|25130-E06|Kate Perez|BOLD ID Engine Manual (Apr 2018)|BOLD:AAJ2138  
Limnophyes bidumus|25130-E11|Kate Perez|BOLD ID Engine Manual (Apr 2018)|BOLD:AAJ2138  
Limnophyes bidumus|25130-H02|Kate Perez|BOLD ID Engine Manual (Apr 2018)|BOLD:AAJ2138  
Limnophyes bidumus|25131-B01|Kate Perez|BOLD ID Engine Manual (Apr 2018)|BOLD:AAJ2138  
Limnophyes bidumus|25131-C10|Kate Perez|BOLD ID Engine Manual (Apr 2018)|BOLD:AAJ2138  
Limnophyes bidumus|25131-D03|Kate Perez|BOLD ID Engine Manual (Apr 2018)|BOLD:AAJ2138  
Limnophyes bidumus|25131-F07|Kate Perez|BOLD ID Engine Manual (Apr 2018)|BOLD:AAJ2138  
Limnophyes bidumus|25131-B07|Kate Perez|BOLD ID Engine Manual (Apr 2018)|BOLD:AAJ2138  
Limnophyes bidumus|25132-D01|Kate Perez|BOLD ID Engine Manual (Apr 2018)|BOLD:AAJ2138  
Limnophyes bidumus|25131-H01|Kate Perez|BOLD ID Engine Manual (Apr 2018)|BOLD:AAJ2138  
Limnophyes bidumus|25132-A01|Kate Perez|BOLD ID Engine Manual (Apr 2018)|BOLD:AAJ2138  
Limnophyes bidumus|25130-C09|Kate Perez|BOLD ID Engine Manual (Apr 2018)|BOLD:AAJ2138  
Limnophyes bidumus|25130-F02|Kate Perez|BOLD ID Engine Manual (Apr 2018)|BOLD:AAJ2138  
Limnophyes bidumus|25129-H10|Kate Perez|BIN Taxonomy Match (Mar 2018)|BOLD:AAJ2138  
Limnophyes bidumus|24354-B09|Kate Perez|BIN Taxonomy Match|BOLD:AAJ2138  
Limnophyes bidumus|25132-E07|Kate Perez|BOLD ID Engine Manual (Apr 2018)|BOLD:AAJ2138  
Limnophyes bidumus|25129-A10|Kate Perez|BIN Taxonomy Match (Mar 2018)|BOLD:AAJ2138  
Limnophyes bidumus|24373-D08|Kate Perez|BIN Taxonomy Match|BOLD:AAJ2138  
Limnophyes bidumus|25128-C04|Kate Perez|BIN Taxonomy Match (Mar 2018)|BOLD:AAJ2138  
Limnophyes bidumus|24465-G03|Kate Perez|BIN Taxonomy Match|BOLD:AAJ2138  
Limnophyes bidumus|24373-G12|Kate Perez|BIN Taxonomy Match|BOLD:AAJ2138  
Limnophyes bidumus|25128-G09|Kate Perez|BIN Taxonomy Match (Mar 2018)|BOLD:AAJ2138  
Limnophyes bidumus|25129-H06|Kate Perez|BIN Taxonomy Match (Mar 2018)|BOLD:AAJ2138  
Limnophyes bidumus|FS0006|Kate Perez|BIN Taxonomy Match|BOLD:AAJ2138  
Limnophyes bidumus|ES376|Elisabeth Sturj|BOLD:AAJ2138  
Limnophyes bidumus|25132-E05|Kate Perez|BOLD ID Engine Manual (Apr 2018)|BOLD:AAJ2138  
Limnophyes bidumus|25132-H10|Kate Perez|BOLD ID Engine Manual (Apr 2018)|BOLD:AAJ2138  
Limnophyes bidumus|25131-D05|Kate Perez|BOLD ID Engine Manual (Apr 2018)|BOLD:AAJ2138  
Limnophyes bidumus|25131-C11|Kate Perez|BOLD ID Engine Manual (Apr 2018)|BOLD:AAJ2138

Limnophyes bidumus|25132-H10|Kate Perez|BOLD ID Engine Manual (Apr 2018)|BOLD:AAJ2138  
Limnophyes bidumus|25131-D05|Kate Perez|BOLD ID Engine Manual (Apr 2018)|BOLD:AAJ2138  
Limnophyes bidumus|25131-C11|Kate Perez|BOLD ID Engine Manual (Apr 2018)|BOLD:AAJ2138  
Limnophyes bidumus|25130-C04|Kate Perez|BOLD ID Engine Manual (Apr 2018)|BOLD:AAJ2138  
Limnophyes bidumus|25132-D05|Kate Perez|BOLD ID Engine Manual (Apr 2018)|BOLD:AAJ2138  
Limnophyes bidumus|25216-A02|Kate Perez|BOLD ID Engine Manual (Apr 2018)|BOLD:AAJ2138  
Limnophyes bidumus|25130-E12|Kate Perez|BOLD ID Engine Manual (Apr 2018)|BOLD:AAJ2138  
Limnophyes bidumus|25131-B03|Kate Perez|BOLD ID Engine Manual (Apr 2018)|BOLD:AAJ2138  
Limnophyes bidumus|25131-E02|Kate Perez|BOLD ID Engine Manual (Apr 2018)|BOLD:AAJ2138  
Limnophyes bidumus|25131-H09|Kate Perez|BOLD ID Engine Manual (Apr 2018)|BOLD:AAJ2138  
Limnophyes bidumus|25132-A10|Kate Perez|BOLD ID Engine Manual (Apr 2018)|BOLD:AAJ2138  
Limnophyes bidumus|25132-F06|Kate Perez|BOLD ID Engine Manual (Apr 2018)|BOLD:AAJ2138  
Limnophyes bidumus|25128-B09|Kate Perez|BIN Taxonomy Match (Mar 2018)|BOLD:AAJ2138  
Limnophyes bidumus|25130-G03|Kate Perez|BOLD ID Engine Manual (Apr 2018)|BOLD:AAJ2138  
Limnophyes bidumus|ATNA493|Elisabeth Sturj|BOLD:AAJ2138  
Limnophyes|CCDB24229-D09|Sofia Wiedenbrug|BIN Taxonomy Match|BOLD:ACU4930  
Limnophyes sp. 4ES|BC-ZSM-DIP-22491-E02|Dieter Doczkal|BOLD:AAI1342  
Limnophyes sp. 4ES|CCDB24037-B12|Sofia Wiedenbrug|BIN Taxonomy Match|BOLD:AAI1342  
Limnophyes sp. 4ES|CCDB22605-A09|Sofia Wiedenbrug|BOLD:AAI1342  
Limnophyes sp. 4ES|CCDB24229-H05|Sofia Wiedenbrug|BIN Taxonomy Match|BOLD:AAI1342  
Limnophyes sp. 4ES|CCDB24229-H11|Sofia Wiedenbrug|BIN Taxonomy Match|BOLD:AAI1342  
Limnophyes sp. 4ES|ZSM34342-B09|Sofia Wiedenbrug|Morphology|BOLD:AAI1342  
Limnophyes sp. 4ES|ZSM34342-G02|Sofia Wiedenbrug|Morphology|BOLD:AAI1342  
Limnophyes sp. 4ES|BC-ZSM-DIP-22551-C03|Dieter Doczkal|BOLD:AAI1342  
Limnophyes sp. 4ES|CCDB24038-F06|Sofia Wiedenbrug|BIN Taxonomy Match|BOLD:AAI1342  
Limnophyes sp. 4ES|CCDB24039-E02|Sofia Wiedenbrug|BIN Taxonomy Match|BOLD:AAI1342  
Limnophyes sp. 4ES|ATNA251|Elisabeth Sturj|BOLD:AAI1342  
Limnophyes sp. 4ES|ATNA287|Elisabeth Sturj|BOLD:AAI1342  
Limnophyes sp. 4ES|ATNA426|Elisabeth Sturj|BOLD:AAI1342  
Limnophyes sp. 4ES|ATNA492|Elisabeth Sturj|BOLD:AAI1342  
Limnophyes sp. 4ES|ATNA491|Elisabeth Sturj|BOLD:AAI1342  
Chironomidae|24464-B03|Mikko J Tiisanen|Tree based identification|BOLD:ACU5458  
Thienemannia libanica|ES13|Elisabeth Sturj|BOLD:AAW6669  
Chironomidae|24468-F12|Mikko J Tiisanen|Tree based identification  
Chironomidae|24474-B12|Mikko J Tiisanen|Tree based identification  
Limnophyes brachytomus|24469-C11|Kate Perez|BIN Taxonomy Match|BOLD:AAB7912  
Limnophyes brachytomus|24372-A08|Kate Perez|BIN Taxonomy Match|BOLD:AAB7912  
Limnophyes brachytomus|24354-E07|Kate Perez|BIN Taxonomy Match|BOLD:AAB7912  
Limnophyes brachytomus|23974-H06|Kate Perez|BIN Taxonomy Match|BOLD:AAB7912  
Limnophyes brachytomus|24373-H05|Kate Perez|BIN Taxonomy Match|BOLD:AAB7912  
Limnophyes brachytomus|24465-E01|Kate Perez|BIN Taxonomy Match|BOLD:AAB7912  
Limnophyes brachytomus|24465-C05|Kate Perez|BIN Taxonomy Match|BOLD:AAB7912  
Limnophyes brachytomus|24539-E09|Kate Perez|BIN Taxonomy Match|BOLD:AAB7912  
Limnophyes brachytomus|24468-D07|Kate Perez|BIN Taxonomy Match|BOLD:AAB7912  
Limnophyes brachytomus|24406-H01|Kate Perez|BIN Taxonomy Match|BOLD:AAB7912  
Limnophyes brachytomus|24539-H08|Kate Perez|BIN Taxonomy Match|BOLD:AAB7912  
Limnophyes brachytomus|ATNA213|Elisabeth Sturj|BOLD:AAB7912  
Limnophyes brachytomus|Finnmark695|Elisabeth Sturj|BOLD:AAU5476  
Limnophyes brachytomus|BIOUG04296-B06|Kate Perez|BIN Taxonomy Match|BOLD:AAU5476  
Limnophyes brachytomus|Finnmark785|G. A. Halvorsen|BOLD:AAU5476  
Limnophyes|ZMUO.025912|Lauri Paasivirta|BOLD:AAU5476  
Limnophyes brachytomus|BIOUG15544-F11|Kate Perez|BIN Taxonomy Match|BOLD:AAU5476  
Limnophyes brachytomus|BIOUG15538-D12|Kate Perez|BIN Taxonomy Match|BOLD:AAU5476  
Limnophyes brachytomus|ZMUO.026166|Lauri Paasivirta|BOLD:ADF1992  
Limnophyes brachytomus|ZMUO.026165|Lauri Paasivirta|BOLD:ADF1992  
Limnophyes|CCDB24229-C07|Sofia Wiedenbrug|BIN Taxonomy Match|BOLD:ACU4607  
Limnophyes|CCDB24228-F02|Sofia Wiedenbrug|BIN Taxonomy Match|BOLD:ACU4607  
Limnophyes gurgicola|CCDB24228-H06|Sofia Wiedenbrug|BIN Taxonomy Match|BOLD:ACU4826  
Limnophyes gurgicola|CCDB24037-G10|Sofia Wiedenbrug|BIN Taxonomy Match|BOLD:ACU4826  
Limnophyes gurgicola|CCDB24038-F11|Sofia Wiedenbrug|BIN Taxonomy Match|BOLD:ACU4826  
Limnophyes gurgicola|BC-ZSM-DIP-22488-H05|Dieter Doczkal|BIN Taxonomy Match|BOLD:ACU4826  
Limnophyes gurgicola|ZSM34342-G06|Sofia Wiedenbrug|Morphology|BOLD:ACU4826  
Limnophyes gurgicola|ZSM34342-F07|Sofia Wiedenbrug|Morphology|BOLD:ACU4826  
Limnophyes gurgicola|ZSM34341-H08|Sofia Wiedenbrug|Morphology|BOLD:ACU4826  
Limnophyes gurgicola|CCDB24039-B11|Sofia Wiedenbrug|BIN Taxonomy Match|BOLD:ACU4826  
Limnophyes gurgicola|CCDB24037-B08|Sofia Wiedenbrug|BIN Taxonomy Match|BOLD:ACU4826  
Limnophyes|ZSM-DIP-33136-F09|Caroline Chimeno|BIN Taxonomy Match (Jan 2022)|BOLD:AAE7221  
Limnophyes pentaplastus|BIOUG08098-E05|Kate Perez|BIN Taxonomy Match|BOLD:AAE6392  
Limnophyes pentaplastus|BIOUG06054-A11|Kate Perez|BIN Taxonomy Match|BOLD:AAE6392  
Limnophyes pentaplastus|ZSM-DIP-33134-D11|Caroline Chimeno|BIN Taxonomy Match (Jan 2022)|BO...  
Limnophyes pentaplastus|ZSM-DIP-33137-C04|Caroline Chimeno|BIN Taxonomy Match (Jan 2022)|BO...  
Limnophyes pentaplastus|ZSM-DIP-33131-D10|Caroline Chimeno|BIN Taxonomy Match (Jan 2022)|BO...  
Limnophyes pentaplastus|BIOUG05215-G02|Kate Perez|BIN Taxonomy Match|BOLD:AAE6392  
Limnophyes pentaplastus|ATNA358|Elisabeth Sturj|BOLD:AAE6392  
Limnophyes pentaplastus|CCDB24229-C02|Sofia Wiedenbrug|BIN Taxonomy Match|BOLD:AAE6392  
Limnophyes pentaplastus|ZSM-DIP-33139-E11|Caroline Chimeno|BIN Taxonomy Match (Jan 2022)|BO...  
Limnophyes pentaplastus|GBOL11506|Sofia Wiedenbrug|BOLD:AAE6392  
Limnophyes pentaplastus|BIOUG16632-B10|Kate Perez|BIN Taxonomy Match|BOLD:AAE6392  
Limnophyes pentaplastus|BIOUG42761-E03|Kate Perez|BIN Taxonomy Match below Phylum (Jun 2019 ...  
Limnophyes pentaplastus|BIOUG15855-H11|Kate Perez|BIN Taxonomy Match|BOLD:AAE6392  
Limnophyes pentaplastus|ZSM-DIP-33137-C08|Caroline Chimeno|BIN Taxonomy Match (Jan 2022)|BO...  
Limnophyes pentaplastus|ZSM-DIP-33143-F12|Caroline Chimeno|BIN Taxonomy Match (Jan 2022)|BO...  
Limnophyes pentaplastus|CCDB24039-H09|Sofia Wiedenbrug|BIN Taxonomy Match|BOLD:AAE6392  
Limnophyes pentaplastus|BIOUG16630-H07|Kate Perez|BIN Taxonomy Match|BOLD:AAE6392  
Limnophyes pentaplastus|NHRS-BYWS00000950|Yngve Brodin|morphology|BOLD:AAE6392  
Limnophyes pentaplastus|SOE284|Elisabeth Sturj|BOLD:AAE6392  
Limnophyes pentaplastus|BIOUG55122-C12|Stefan Schmidt|BIN Taxonomy Match (Sep 2020)|BOLD ...  
Limnophyes pentaplastus|BIOUG16777-A11|Kate Perez|BIN Taxonomy Match|BOLD:AAE6392  
Limnophyes pentaplastus|BIOUG42709-C07|Kate Perez|BIN Taxonomy Match below Phylum (Jun 2019 ...  
Limnophyes pentaplastus|CH-OSF124|Elisabeth Sturj|BOLD:AAE6392  
Limnophyes pentaplastus|CH-OSF151|Elisabeth Sturj|BOLD:AAE6392  
Limnophyes pentaplastus|CH-OSF09|Elisabeth Sturj|BOLD:AAE6392  
Limnophyes pentaplastus|ZSM-DIP-33136-F07|Caroline Chimeno|BIN Taxonomy Match (Jan 2022)|BO...  
Limnophyes pentaplastus|GBOL11509|Sofia Wiedenbrug|BOLD:AAE6392  
Limnophyes pentaplastus|CCDB24183-C11|Sofia Wiedenbrug|Morphology|BOLD:AAE6392  
Limnophyes pentaplastus|BIOUG15895-E05|Kate Perez|BIN Taxonomy Match|BOLD:AAE6392  
Limnophyes pentaplastus|CCDB24037-B09|Sofia Wiedenbrug|BIN Taxonomy Match|BOLD:AAE6392  
Limnophyes pentaplastus|CCDB24037-G09|Sofia Wiedenbrug|BIN Taxonomy Match|BOLD:AAE6392  
Limnophyes pentaplastus|BIOUG15464-F01|Kate Perez|BIN Taxonomy Match|BOLD:AAE6392  
Limnophyes pentaplastus|CCDB24228-G12|Sofia Wiedenbrug|BIN Taxonomy Match|BOLD:AAE6392  
Limnophyes pentaplastus|BIOUG06056-H05|Kate Perez|BIN Taxonomy Match|BOLD:AAE6392  
Limnophyes pentaplastus|ZSM-DIP-33144-A07|Caroline Chimeno|BIN Taxonomy Match (Jan 2022)|BO...  
Limnophyes pentaplastus|ZSM-DIP-33143-A06|Caroline Chimeno|BIN Taxonomy Match (Jan 2022)|BO...

Linnophyes pentaplastus|CCDB2428-G12|Sofia Wiedenbrug|BIN Taxonomy Match|BOLD:AAE6392  
Linnophyes pentaplastus|BIOUG06056-H05|Kate Perez|BIN Taxonomy Match|BOLD:AAE6392  
Linnophyes pentaplastus|ZSM-DIP-33144-A07|Caroline Chimenó|BIN Taxonomy Match (Jan 2022)|BO...  
Linnophyes pentaplastus|ZSM-DIP-33132-A02|Caroline Chimenó|BIN Taxonomy Match (Jan 2022)|BO...  
Linnophyes pentaplastus|ZSM-DIP-33137-C02|Caroline Chimenó|BIN Taxonomy Match (Jan 2022)|BO...  
Linnophyes pentaplastus|CCDB24038-C04|Sofia Wiedenbrug|BIN Taxonomy Match|BOLD:AAE6392  
Linnophyes pentaplastus|ZSM-DIP-33137-C05|Caroline Chimenó|BIN Taxonomy Match (Jan 2022)|BO...  
Linnophyes pentaplastus|BC-ZSM-DIP-22491-G07|Dieter Doczkal|BOLD:AAE6392  
Linnophyes pentaplastus|BC-ZSM-DIP-22488-H09|Dieter Doczkal|BOLD:AAE6392  
Linnophyes pentaplastus|ZSM34342-G05|Sofia Wiedenbrug|Morphology  
Linnophyes pentaplastus|ZSM34342-E03|Sofia Wiedenbrug|Morphology|BOLD:AAE6392  
Linnophyes pentaplastus|ZSM34342-C10|Sofia Wiedenbrug|Morphology|BOLD:AAE6392  
Linnophyes pentaplastus|BC-ZSM-DIP-22488-E06|Dieter Doczkal|BOLD:AAE6392  
Linnophyes pentaplastus|CCDB24037-G06|Sofia Wiedenbrug|BIN Taxonomy Match|BOLD:AAE6392  
Linnophyes pentaplastus|CCDB24039-H06|Sofia Wiedenbrug|BIN Taxonomy Match|BOLD:AAE6392  
Linnophyes pentaplastus|BIOUG42678-G05|Kate Perez|BIN Taxonomy Match below Phylum (Jun 2019) ...  
Linnophyes pentaplastus|BIOUG55127-B01|Stefan Schmidt|BIN Taxonomy Match (Sep 2020)|BOLD ...  
Linnophyes pentaplastus|CCDB24229-D07|Sofia Wiedenbrug|BIN Taxonomy Match|BOLD:AAE6392  
Linnophyes pentaplastus|ES165|Elisabeth Stur|BOLD:AAE6392  
Linnophyes pentaplastus|BIOUG15797-F02|Kate Perez|BIN Taxonomy Match|BOLD:AAE6392  
Linnophyes pentaplastus|SOE455|Elisabeth Stur|BOLD:AAE6392  
Linnophyes pentaplastus|EJV-20110196|Lauri Paasivirta|BOLD:AAE6392  
Linnophyes pentaplastus|ZMUO.024576|Lauri Paasivirta|BOLD:AAE6392  
Linnophyes pentaplastus|ZMUO.024577|Lauri Paasivirta|BOLD:AAE6392  
Linnophyes pentaplastus|TRD-CH46|Elisabeth Stur|BOLD:AAE6392  
Linnophyes pentaplastus|EJV-20110195|Lauri Paasivirta|BOLD:AAE6392  
Linnophyes pentaplastus|EJV-20110194|Lauri Paasivirta|BOLD:AAE6392  
Linnophyes spinigus|ZMUO.024738|Lauri Paasivirta|BOLD:ADA8578  
Linnophyes spinigus|ZMUO.026133|Lauri Paasivirta|BOLD:ADA8578  
Linnophyes spinigus|ZMUO.026132|Lauri Paasivirta|BOLD:ADA8578  
Linnophyes|ZMUO.024916|Lauri Paasivirta|BOLD:ADA8578  
Linnophyes angelicae|ZMUO.024735|Lauri Paasivirta|BOLD:ADA8578  
Linnophyes angelicae|ZMUO.024734|Lauri Paasivirta|BOLD:ADA8578  
Linnophyes|ZMUO.024917|Lauri Paasivirta|BOLD:ADA8578  
Linnophyes difficilis|NHRS-BYWS00000544|Yngve Brodin|morphology|BOLD:ACR2664  
Linnophyes difficilis|NHRS-BYWS00000437|Yngve Brodin|morphology|BOLD:ACR2664  
Linnophyes habilis|BIOUG16778-D08|Kate Perez|BIN Taxonomy Match|BOLD:AAJ2130  
Linnophyes habilis|BIOUG16775-H11|Kate Perez|BIN Taxonomy Match|BOLD:AAJ2130  
Linnophyes habilis|BIOUG16721-C08|Kate Perez|BIN Taxonomy Match|BOLD:AAJ2130  
Linnophyes habilis|BIOUG16855-E09|Kate Perez|BIN Taxonomy Match|BOLD:AAJ2130  
Linnophyes habilis|BIOUG16779-E06|Kate Perez|BIN Taxonomy Match|BOLD:AAJ2130  
Linnophyes habilis|BIOUG16782-A03|Kate Perez|BIN Taxonomy Match|BOLD:AAJ2130  
Linnophyes habilis|BIOUG16785-D02|Kate Perez|BIN Taxonomy Match|BOLD:AAJ2130  
Linnophyes habilis|BIOUG17120-C10|Kate Perez|BIN Taxonomy Match|BOLD:AAJ2130  
Linnophyes habilis|BIOUG42748-F04|Kate Perez|BIN Taxonomy Match below Phylum (Jun 2019)|BOL...  
Linnophyes habilis|BIOUG16785-A10|Kate Perez|BIN Taxonomy Match|BOLD:AAJ2130  
Linnophyes habilis|BIOUG16779-E04|Kate Perez|BIN Taxonomy Match|BOLD:AAJ2130  
Linnophyes habilis|ZSM-DIP-33142-A09|Caroline Chimenó|BIN Taxonomy Match (Jan 2022)|BOLD ...  
Linnophyes habilis|BIOUG16853-D12|Kate Perez|BIN Taxonomy Match|BOLD:AAJ2130  
Linnophyes habilis|BIOUG16782-G02|Kate Perez|BIN Taxonomy Match|BOLD:AAJ2130  
Linnophyes habilis|BIOUG16779-F08|Kate Perez|BIN Taxonomy Match|BOLD:AAJ2130  
Linnophyes habilis|BIOUG16784-A05|Kate Perez|BIN Taxonomy Match|BOLD:AAJ2130  
Linnophyes habilis|BIOUG16740-B10|Kate Perez|BIN Taxonomy Match|BOLD:AAJ2130  
Linnophyes habilis|BIOUG16785-A05|Kate Perez|BIN Taxonomy Match|BOLD:AAJ2130  
Linnophyes habilis|BIOUG42757-B07|Kate Perez|BIN Taxonomy Match below Phylum (Jun 2019)|BOL...  
Linnophyes habilis|BIOUG42918-C02|Kate Perez|BIN Taxonomy Match below Phylum (Jun 2019)|BOL...  
Linnophyes habilis|BIOUG16785-B05|Kate Perez|BIN Taxonomy Match|BOLD:AAJ2130  
Linnophyes habilis|BIOUG16296-E09|Kate Perez|BIN Taxonomy Match|BOLD:AAJ2130  
Linnophyes habilis|BIOUG16430-H01|Kate Perez|BIN Taxonomy Match|BOLD:AAJ2130  
Linnophyes habilis|BIOUG16432-E11|Kate Perez|BIN Taxonomy Match|BOLD:AAJ2130  
Linnophyes habilis|BIOUG16626-D01|Kate Perez|BIN Taxonomy Match|BOLD:AAJ2130  
Linnophyes habilis|BIOUG15792-G12|Kate Perez|BIN Taxonomy Match|BOLD:AAJ2130  
Linnophyes habilis|BIOUG15765-D12|Kate Perez|BIN Taxonomy Match|BOLD:AAJ2130  
Linnophyes habilis|BIOUG16297-H09|Kate Perez|BIN Taxonomy Match|BOLD:AAJ2130  
Linnophyes habilis|BIOUG16552-A03|Kate Perez|BIN Taxonomy Match|BOLD:AAJ2130  
Linnophyes habilis|BIOUG16631-B11|Kate Perez|BIN Taxonomy Match|BOLD:AAJ2130  
Linnophyes habilis|ZMUO.024655|Lauri Paasivirta|BOLD:AAJ2130  
Linnophyes habilis|BIOUG15905-B11|Kate Perez|BIN Taxonomy Match|BOLD:AAJ2130  
Linnophyes habilis|BIOUG16712-C12|Kate Perez|BIN Taxonomy Match|BOLD:AAJ2130  
Linnophyes habilis|BIOUG16259-D02|Kate Perez|BIN Taxonomy Match|BOLD:AAJ2130  
Linnophyes habilis|BIOUG15765-F07|Kate Perez|BIN Taxonomy Match|BOLD:AAJ2130  
Linnophyes habilis|BIOUG15966-G07|Kate Perez|BIN Taxonomy Match|BOLD:AAJ2130  
Linnophyes habilis|BIOUG55193-B05|Stefan Schmidt|BIN Taxonomy Match (Sep 2020)|BOLD:AAJ2130  
Linnophyes habilis|TRD-CH124|Elisabeth Stur|BOLD:AAJ2130  
Linnophyes habilis|BIOUG16785-E12|Kate Perez|BIN Taxonomy Match|BOLD:AAJ2130  
Linnophyes habilis|BC-ZSM-DIP-22488-G01|Dieter Doczkal|BOLD:AAJ2130  
Linnophyes habilis|BIOUG08367-D07|Kate Perez|BIN Taxonomy Match|BOLD:AAJ2130  
Linnophyes habilis|BIOUG16776-A03|Kate Perez|BIN Taxonomy Match|BOLD:AAJ2130  
Linnophyes habilis|BIOUG16740-H03|Kate Perez|BIN Taxonomy Match|BOLD:AAJ2130  
Linnophyes habilis|BIOUG16707-H06|Kate Perez|BIN Taxonomy Match|BOLD:AAJ2130  
Linnophyes habilis|BIOUG16778-H07|Kate Perez|BIN Taxonomy Match|BOLD:AAJ2130  
Linnophyes habilis|BIOUG42915-B01|Kate Perez|BIN Taxonomy Match below Phylum (Jun 2019)|BOL...  
Linnophyes habilis|BIOUG42714-A08|Kate Perez|BIN Taxonomy Match below Phylum (Jun 2019)|BOL...  
Linnophyes habilis|BIOUG16779-D05|Kate Perez|BIN Taxonomy Match|BOLD:AAJ2130  
Linnophyes habilis|BIOUG42961-G01|Kate Perez|BIN Taxonomy Match below Phylum (Jun 2019)|BOL...  
Linnophyes habilis|BIOUG16783-F05|Kate Perez|BIN Taxonomy Match|BOLD:AAJ2130  
Linnophyes habilis|BIOUG16892-H09|Kate Perez|BIN Taxonomy Match|BOLD:AAJ2130  
Linnophyes habilis|BIOUG16777-G11|Kate Perez|BIN Taxonomy Match|BOLD:AAJ2130  
Linnophyes habilis|BIOUG42764-E01|Kate Perez|BIN Taxonomy Match below Phylum (Jun 2019)|BOL...  
Linnophyes habilis|BIOUG16738-H09|Kate Perez|BIN Taxonomy Match|BOLD:AAJ2130  
Linnophyes habilis|BIOUG15649-E08|Kate Perez|BIN Taxonomy Match|BOLD:AAJ2130  
Linnophyes habilis|BIOUG16775-C11|Kate Perez|BIN Taxonomy Match|BOLD:AAJ2130  
Linnophyes habilis|BIOUG16779-A02|Kate Perez|BIN Taxonomy Match|BOLD:AAJ2130  
Linnophyes habilis|BIOUG16778-G01|Kate Perez|BIN Taxonomy Match|BOLD:AAJ2130  
Linnophyes habilis|BIOUG16738-C10|Kate Perez|BIN Taxonomy Match|BOLD:AAJ2130  
Linnophyes habilis|BIOUG16779-H10|Kate Perez|BIN Taxonomy Match|BOLD:AAJ2130  
Linnophyes habilis|BIOUG16739-F05|Kate Perez|BIN Taxonomy Match|BOLD:AAJ2130  
Linnophyes habilis|BIOUG16782-D11|Kate Perez|BIN Taxonomy Match|BOLD:AAJ2130  
Linnophyes habilis|BIOUG16784-H06|Kate Perez|BIN Taxonomy Match|BOLD:AAJ2130  
Linnophyes habilis|BIOUG17099-G03|Kate Perez|BIN Taxonomy Match|BOLD:AAJ2130  
Linnophyes habilis|BIOUG16740-B04|Kate Perez|BIN Taxonomy Match|BOLD:AAJ2130  
Linnophyes habilis|BIOUG15457-F04|Kate Perez|BIN Taxonomy Match|BOLD:AAJ2130  
Linnophyes habilis|BIOUG16778-F04|Kate Perez|BIN Taxonomy Match|BOLD:AAJ2130

Limnophyes habilis|BIOUG16740-B04|Kate Perez|BIN Taxonomy Match|BOLD:AAJ2130  
Limnophyes habilis|BIOUG15457-F04|Kate Perez|BIN Taxonomy Match|BOLD:AAJ2130  
Limnophyes habilis|BIOUG16778-F04|Kate Perez|BIN Taxonomy Match|BOLD:AAJ2130  
Limnophyes habilis|BIOUG16785-F11|Kate Perez|BIN Taxonomy Match|BOLD:AAJ2130  
Limnophyes habilis|BIOUG16782-D01|Kate Perez|BIN Taxonomy Match|BOLD:AAJ2130  
Limnophyes habilis|BIOUG16783-F02|Kate Perez|BIN Taxonomy Match|BOLD:AAJ2130  
Limnophyes habilis|BIOUG15952-B09|Kate Perez|BIN Taxonomy Match|BOLD:AAJ2130  
Limnophyes habilis|BIOUG16784-H09|Kate Perez|BIN Taxonomy Match|BOLD:AAJ2130  
Limnophyes habilis|BIOUG16778-B03|Kate Perez|BIN Taxonomy Match|BOLD:AAJ2130  
Limnophyes habilis|BIOUG16778-H10|Kate Perez|BIN Taxonomy Match|BOLD:AAJ2130  
Limnophyes habilis|BIOUG16779-A10|Kate Perez|BIN Taxonomy Match|BOLD:AAJ2130  
Limnophyes habilis|BIOUG16778-C09|Kate Perez|BIN Taxonomy Match|BOLD:AAJ2130  
Limnophyes habilis|BIOUG15963-B04|Kate Perez|BIN Taxonomy Match|BOLD:AAJ2130  
Limnophyes habilis|BIOUG16332-D09|Kate Perez|BIN Taxonomy Match|BOLD:AAJ2130  
Limnophyes habilis|BIOUG16711-B03|Kate Perez|BIN Taxonomy Match|BOLD:AAJ2130  
Limnophyes habilis|BIOUG16784-G03|Kate Perez|BIN Taxonomy Match|BOLD:AAJ2130  
Limnophyes habilis|BIOUG16775-F11|Kate Perez|BIN Taxonomy Match|BOLD:AAJ2130  
Limnophyes habilis|BIOUG16626-A09|Kate Perez|BIN Taxonomy Match|BOLD:AAJ2130  
Limnophyes habilis|BIOUG42921-E10|Kate Perez|BIN Taxonomy Match below Phylum (Jun 2019)|BOL...  
Limnophyes habilis|BIOUG42663-A08|Kate Perez|BIN Taxonomy Match below Phylum (Jun 2019)|BOL...  
Limnophyes habilis|BIOUG55105-F08|Stefan Schmidt|BIN Taxonomy Match (Sep 2020)|BOLD:AAJ2130  
Limnophyes habilis|BIOUG43080-G09|Kate Perez|BIN Taxonomy Match below Phylum (Jun 2019)|BOL...  
Limnophyes habilis|BIOUG15766-G09|Kate Perez|BIN Taxonomy Match|BOLD:AAJ2130  
Limnophyes habilis|ZMUO.024656|Lauri Paasivirta|BOLD:AAJ2130  
Limnophyes habilis|BIOUG16778-G06|Kate Perez|BIN Taxonomy Match|BOLD:AAJ2130  
Limnophyes habilis|BIOUG15853-C12|Kate Perez|BIN Taxonomy Match|BOLD:AAJ2130  
Limnophyes habilis|BIOUG16778-G11|Kate Perez|BIN Taxonomy Match|BOLD:AAJ2130  
Limnophyes habilis|BIOUG15809-A03|Kate Perez|BIN Taxonomy Match|BOLD:AAJ2130  
Limnophyes habilis|BIOUG16625-G02|Kate Perez|BIN Taxonomy Match|BOLD:AAJ2130  
Limnophyes habilis|BIOUG16776-G06|Kate Perez|BIN Taxonomy Match|BOLD:AAJ2130  
Limnophyes habilis|BIOUG16625-A09|Kate Perez|BIN Taxonomy Match|BOLD:AAJ2130  
Limnophyes habilis|BIOUG16198-C09|Kate Perez|BIN Taxonomy Match|BOLD:AAJ2130  
Limnophyes habilis|BIOUG16775-E12|Kate Perez|BIN Taxonomy Match|BOLD:AAJ2130  
Limnophyes habilis|BIOUG16855-C06|Kate Perez|BIN Taxonomy Match|BOLD:AAJ2130  
Limnophyes habilis|BIOUG54160-B08|Stefan Schmidt|BIN Taxonomy Match (Sep 2020)|BOLD:AAJ2130  
Limnophyes habilis|BIOUG16784-F11|Kate Perez|BIN Taxonomy Match|BOLD:AAJ2130  
Limnophyes habilis|BIOUG16785-A08|Kate Perez|BIN Taxonomy Match|BOLD:AAJ2130  
Limnophyes habilis|BIOUG17025-C11|Kate Perez|BIN Taxonomy Match|BOLD:AAJ2130  
Limnophyes habilis|BIOUG16435-H11|Kate Perez|BIN Taxonomy Match|BOLD:AAJ2130  
Limnophyes habilis|BIOUG16740-A04|Kate Perez|BIN Taxonomy Match|BOLD:AAJ2130  
Limnophyes habilis|BIOUG15807-G10|Kate Perez|BIN Taxonomy Match|BOLD:AAJ2130  
Limnophyes habilis|BIOUG16721-H08|Kate Perez|BIN Taxonomy Match|BOLD:AAJ2130  
Limnophyes habilis|BIOUG15954-E07|Kate Perez|BIN Taxonomy Match|BOLD:AAJ2130  
Limnophyes habilis|BIOUG16625-B06|Kate Perez|BIN Taxonomy Match|BOLD:AAJ2130  
Limnophyes habilis|BIOUG16627-A03|Kate Perez|BIN Taxonomy Match|BOLD:AAJ2130  
Limnophyes habilis|BIOUG16778-C05|Kate Perez|BIN Taxonomy Match|BOLD:AAJ2130  
Limnophyes habilis|BIOUG16782-C10|Kate Perez|BIN Taxonomy Match|BOLD:AAJ2130  
Limnophyes habilis|BIOUG15184-E01|Kate Perez|BIN Taxonomy Match|BOLD:AAJ2130  
Limnophyes habilis|BIOUG16552-G02|Kate Perez|BIN Taxonomy Match|BOLD:AAJ2130  
Limnophyes habilis|BIOUG15761-A11|Kate Perez|BIN Taxonomy Match|BOLD:AAJ2130  
Limnophyes habilis|BIOUG15720-H11|Kate Perez|BIN Taxonomy Match|BOLD:AAJ2130  
Limnophyes habilis|BIOUG16777-B09|Kate Perez|BIN Taxonomy Match|BOLD:AAJ2130  
Limnophyes habilis|BIOUG16778-B11|Kate Perez|BIN Taxonomy Match|BOLD:AAJ2130  
Limnophyes habilis|BIOUG16777-B05|Kate Perez|BIN Taxonomy Match|BOLD:AAJ2130  
Limnophyes habilis|BIOUG16784-F01|Kate Perez|BIN Taxonomy Match|BOLD:AAJ2130  
Limnophyes habilis|BIOUG16779-H09|Kate Perez|BIN Taxonomy Match|BOLD:AAJ2130  
Limnophyes habilis|BIOUG16777-D04|Kate Perez|BIN Taxonomy Match|BOLD:AAJ2130  
Limnophyes habilis|BIOUG16777-C10|Kate Perez|BIN Taxonomy Match|BOLD:AAJ2130  
Limnophyes habilis|BIOUG16777-B07|Kate Perez|BIN Taxonomy Match|BOLD:AAJ2130  
Limnophyes habilis|BIOUG16779-F10|Kate Perez|BIN Taxonomy Match|BOLD:AAJ2130  
Limnophyes habilis|BIOUG16777-C02|Kate Perez|BIN Taxonomy Match|BOLD:AAJ2130  
Limnophyes habilis|BIOUG42931-A06|Kate Perez|BIN Taxonomy Match below Phylum (Jun 2019)|BOL...  
Limnophyes habilis|BIOUG16782-A07|Kate Perez|BIN Taxonomy Match|BOLD:AAJ2130  
Limnophyes habilis|BIOUG16857-F08|Kate Perez|BIN Taxonomy Match|BOLD:AAJ2130  
Limnophyes habilis|BIOUG16779-E10|Kate Perez|BIN Taxonomy Match|BOLD:AAJ2130  
Limnophyes habilis|ZSM-DIP-33145-C04|Caroline Chimeno|BIN Taxonomy Match (Jan 2022)|BOLD ...  
Limnophyes habilis|BIOUG16856-A03|Kate Perez|BIN Taxonomy Match|BOLD:AAJ2130  
Limnophyes habilis|BIOUG16740-E03|Kate Perez|BIN Taxonomy Match|BOLD:AAJ2130  
Limnophyes habilis|BIOUG16777-D09|Kate Perez|BIN Taxonomy Match|BOLD:AAJ2130  
Limnophyes habilis|BIOUG16777-F06|Kate Perez|BIN Taxonomy Match|BOLD:AAJ2130  
Limnophyes habilis|BIOUG16777-C12|Kate Perez|BIN Taxonomy Match|BOLD:AAJ2130  
Limnophyes habilis|BIOUG16779-D02|Kate Perez|BIN Taxonomy Match|BOLD:AAJ2130  
Limnophyes habilis|BIOUG42669-G04|Kate Perez|BIN Taxonomy Match below Phylum (Jun 2019)|BOL...  
Limnophyes habilis|BIOUG16894-B02|Kate Perez|BIN Taxonomy Match|BOLD:AAJ2130  
Limnophyes habilis|BIOUG16777-D05|Kate Perez|BIN Taxonomy Match|BOLD:AAJ2130  
Limnophyes habilis|BIOUG16776-H06|Kate Perez|BIN Taxonomy Match|BOLD:AAJ2130  
Limnophyes habilis|BIOUG16738-C11|Kate Perez|BIN Taxonomy Match|BOLD:AAJ2130  
Limnophyes habilis|BIOUG16721-E04|Kate Perez|BIN Taxonomy Match|BOLD:AAJ2130  
Limnophyes habilis|BIOUG16775-A10|Kate Perez|BIN Taxonomy Match|BOLD:AAJ2130  
Limnophyes habilis|BIOUG16784-D11|Kate Perez|BIN Taxonomy Match|BOLD:AAJ2130  
Limnophyes habilis|BIOUG54161-F02|Stefan Schmidt|BIN Taxonomy Match (Sep 2020)|BOLD:AAJ2130  
Limnophyes habilis|BIOUG16739-F09|Kate Perez|BIN Taxonomy Match|BOLD:AAJ2130  
Limnophyes habilis|BIOUG16739-F12|Kate Perez|BIN Taxonomy Match|BOLD:AAJ2130  
Limnophyes habilis|BIOUG16782-H06|Kate Perez|BIN Taxonomy Match|BOLD:AAJ2130  
Limnophyes habilis|BC-ZSM-DIP-22488-D11|Dieter Doczkal|BOLD:AAJ2130  
Limnophyes habilis|BIOUG16721-C11|Kate Perez|BIN Taxonomy Match|BOLD:AAJ2130  
Limnophyes habilis|BIOUG16892-G08|Kate Perez|BIN Taxonomy Match|BOLD:AAJ2130  
Limnophyes habilis|BIOUG16783-C09|Kate Perez|BIN Taxonomy Match|BOLD:AAJ2130  
Limnophyes habilis|BIOUG42961-D03|Kate Perez|BIN Taxonomy Match below Phylum (Jun 2019)|BOL...  
Limnophyes habilis|BIOUG16893-A04|Kate Perez|BIN Taxonomy Match|BOLD:AAJ2130  
Limnophyes habilis|BIOUG16779-E11|Kate Perez|BIN Taxonomy Match|BOLD:AAJ2130  
Limnophyes habilis|BIOUG16720-A09|Kate Perez|BIN Taxonomy Match|BOLD:AAJ2130  
Limnophyes habilis|BIOUG16721-G10|Kate Perez|BIN Taxonomy Match|BOLD:AAJ2130  
Limnophyes habilis|BIOUG16785-G07|Kate Perez|BIN Taxonomy Match|BOLD:AAJ2130  
Limnophyes habilis|BIOUG16721-D12|Kate Perez|BIN Taxonomy Match|BOLD:AAJ2130  
Limnophyes habilis|BIOUG16784-D12|Kate Perez|BIN Taxonomy Match|BOLD:AAJ2130  
Limnophyes habilis|BIOUG16779-D07|Kate Perez|BIN Taxonomy Match|BOLD:AAJ2130  
Limnophyes habilis|BIOUG16738-H02|Kate Perez|BIN Taxonomy Match|BOLD:AAJ2130  
Limnophyes habilis|BIOUG15809-E11|Kate Perez|BIN Taxonomy Match|BOLD:AAJ2130  
Limnophyes habilis|BIOUG16855-C10|Kate Perez|BIN Taxonomy Match|BOLD:AAJ2130  
Limnophyes habilis|BIOUG42675-F07|Kate Perez|BIN Taxonomy Match below Phylum (Jun 2019)|BOL...  
Limnophyes habilis|BIOUG42710-E01|Kate Perez|BIN Taxonomy Match below Phylum (Jun 2019)|BOL...  
Limnophyes habilis|BIOUG16784-A10|Kate Perez|BIN Taxonomy Match|BOLD:AAJ2130









Limnophyes habilis|BIOUG16782-B01|Kate Perez|BIN Taxonomy Match|BOLD:AAJ2130  
Limnophyes habilis|BIOUG42759-D02|Kate Perez|BIN Taxonomy Match below Phylum (Jun 2019)|BOL...  
Limnophyes habilis|BIOUG42718-C02|Kate Perez|BIN Taxonomy Match below Phylum (Jun 2019)|BOL...  
Limnophyes habilis|BIOUG42708-F07|Kate Perez|BIN Taxonomy Match below Phylum (Jun 2019)|BOL...  
Limnophyes habilis|BIOUG16783-C06|Kate Perez|BIN Taxonomy Match|BOLD:AAJ2130  
Limnophyes habilis|BIOUG16776-F01|Kate Perez|BIN Taxonomy Match|BOLD:AAJ2130  
Limnophyes habilis|BIOUG16431-E10|Kate Perez|BIN Taxonomy Match|BOLD:AAJ2130  
Limnophyes habilis|BIOUG16703-E10|Kate Perez|BIN Taxonomy Match|BOLD:AAJ2130  
Limnophyes habilis|BIOUG07949-A02|Kate Perez|BIN Taxonomy Match|BOLD:AAJ2130  
Limnophyes habilis|BIOUG16776-H09|Kate Perez|BIN Taxonomy Match|BOLD:AAJ2130  
Limnophyes habilis|BIOUG16775-B12|Kate Perez|BIN Taxonomy Match|BOLD:AAJ2130  
Limnophyes habilis|BIOUG16738-B08|Kate Perez|BIN Taxonomy Match|BOLD:AAJ2130  
Limnophyes habilis|BIOUG16720-A08|Kate Perez|BIN Taxonomy Match|BOLD:AAJ2130  
Limnophyes habilis|BIOUG16721-D04|Kate Perez|BIN Taxonomy Match|BOLD:AAJ2130  
Limnophyes habilis|BIOUG16721-G06|Kate Perez|BIN Taxonomy Match|BOLD:AAJ2130  
Limnophyes habilis|BIOUG16775-B09|Kate Perez|BIN Taxonomy Match|BOLD:AAJ2130  
Limnophyes habilis|BIOUG42675-C08|Kate Perez|BIN Taxonomy Match below Phylum (Jun 2019)|BOL...  
Limnophyes habilis|BIOUG16776-E03|Kate Perez|BIN Taxonomy Match|BOLD:AAJ2130  
Limnophyes habilis|BIOUG15766-H04|Kate Perez|BIN Taxonomy Match|BOLD:AAJ2130  
Limnophyes habilis|BIOUG16713-G08|Kate Perez|BIN Taxonomy Match|BOLD:AAJ2130  
Limnophyes habilis|BIOUG16625-F06|Kate Perez|BIN Taxonomy Match|BOLD:AAJ2130  
Limnophyes habilis|BIOUG16298-D03|Kate Perez|BIN Taxonomy Match|BOLD:AAJ2130  
Limnophyes habilis|BIOUG16626-H11|Kate Perez|BIN Taxonomy Match|BOLD:AAJ2130  
Limnophyes habilis|BIOUG17064-H08|Kate Perez|BIN Taxonomy Match|BOLD:AAJ2130  
Limnophyes habilis|BIOUG16436-E11|Kate Perez|BIN Taxonomy Match|BOLD:AAJ2130  
Limnophyes habilis|BIOUG16333-E07|Kate Perez|BIN Taxonomy Match|BOLD:AAJ2130  
Limnophyes habilis|BIOUG15954-C09|Kate Perez|BIN Taxonomy Match|BOLD:AAJ2130  
Limnophyes habilis|BIOUG16785-B03|Kate Perez|BIN Taxonomy Match|BOLD:AAJ2130  
Limnophyes habilis|BIOUG16775-E01|Kate Perez|BIN Taxonomy Match|BOLD:AAJ2130  
Limnophyes habilis|ATNA414|Elisabeth Sturj|BOLD:AAJ2130  
Limnophyes habilis|BIOUG16776-A01|Kate Perez|BIN Taxonomy Match|BOLD:AAJ2130  
Limnophyes habilis|BIOUG16776-G05|Kate Perez|BIN Taxonomy Match|BOLD:AAJ2130  
Limnophyes habilis|BIOUG16779-A12|Kate Perez|BIN Taxonomy Match|BOLD:AAJ2130  
Limnophyes habilis|BIOUG42763-G03|Kate Perez|BIN Taxonomy Match below Phylum (Jun 2019)|BOL...  
Limnophyes habilis|BIOUG16777-G06|Kate Perez|BIN Taxonomy Match|BOLD:AAJ2130  
Limnophyes habilis|ZSM-DIP-33132-H05|Caroline Chimeno|BIN Taxonomy Match (Jan 2022)|BOLD ...  
Limnophyes habilis|BIOUG17114-H11|Kate Perez|BIN Taxonomy Match|BOLD:AAJ2130  
Limnophyes habilis|BIOUG16776-H10|Kate Perez|BIN Taxonomy Match|BOLD:AAJ2130  
Limnophyes habilis|BIOUG16784-B06|Kate Perez|BIN Taxonomy Match|BOLD:AAJ2130  
Limnophyes habilis|BIOUG16333-F03|Kate Perez|BIN Taxonomy Match|BOLD:AAJ2130  
Limnophyes habilis|BIOUG16738-G07|Kate Perez|BIN Taxonomy Match|BOLD:AAJ2130  
Limnophyes habilis|BIOUG16782-G07|Kate Perez|BIN Taxonomy Match|BOLD:AAJ2130  
Limnophyes habilis|BIOUG16776-E12|Kate Perez|BIN Taxonomy Match|BOLD:AAJ2130  
Limnophyes habilis|BIOUG16782-G06|Kate Perez|BIN Taxonomy Match|BOLD:AAJ2130  
Limnophyes habilis|BIOUG16739-B12|Kate Perez|BIN Taxonomy Match|BOLD:AAJ2130  
Limnophyes habilis|BIOUG16892-B12|Kate Perez|BIN Taxonomy Match|BOLD:AAJ2130  
Limnophyes habilis|BIOUG16784-H01|Kate Perez|BIN Taxonomy Match|BOLD:AAJ2130  
Limnophyes habilis|BIOUG16784-E11|Kate Perez|BIN Taxonomy Match|BOLD:AAJ2130  
Limnophyes habilis|BIOUG16783-A06|Kate Perez|BIN Taxonomy Match|BOLD:AAJ2130  
Limnophyes habilis|BIOUG55111-A06|Stefan Schmidt|BIN Taxonomy Match (Sep 2020)|BOLD:AAJ2130  
Limnophyes habilis|BIOUG16783-E11|Kate Perez|BIN Taxonomy Match|BOLD:AAJ2130  
Limnophyes habilis|BIOUG16785-D03|Kate Perez|BIN Taxonomy Match|BOLD:AAJ2130  
Limnophyes habilis|BIOUG16784-C09|Kate Perez|BIN Taxonomy Match|BOLD:AAJ2130  
Limnophyes habilis|BIOUG15793-E01|Kate Perez|BIN Taxonomy Match|BOLD:AAJ2130  
Limnophyes habilis|BIOUG16784-C03|Kate Perez|BIN Taxonomy Match|BOLD:AAJ2130  
Limnophyes habilis|BIOUG16713-A05|Kate Perez|BIN Taxonomy Match|BOLD:AAJ2130  
Limnophyes habilis|BIOUG16739-D11|Kate Perez|BIN Taxonomy Match|BOLD:AAJ2130  
Limnophyes habilis|BIOUG42926-E07|Kate Perez|BIN Taxonomy Match below Phylum (Jun 2019)|BOL...  
Limnophyes habilis|TRD-CH64|Elisabeth Sturj|BOLD:AAJ2130  
Limnophyes habilis|BIOUG16777-H04|Kate Perez|BIN Taxonomy Match|BOLD:AAJ2130  
Limnophyes habilis|BIOUG16739-H03|Kate Perez|BIN Taxonomy Match|BOLD:AAJ2130  
Limnophyes habilis|BIOUG16777-D08|Kate Perez|BIN Taxonomy Match|BOLD:AAJ2130  
Limnophyes habilis|BIOUG16740-D09|Kate Perez|BIN Taxonomy Match|BOLD:AAJ2130  
Limnophyes habilis|BIOUG16721-F05|Kate Perez|BIN Taxonomy Match|BOLD:AAJ2130  
Limnophyes habilis|BIOUG16775-C10|Kate Perez|BIN Taxonomy Match|BOLD:AAJ2130  
Limnophyes habilis|BIOUG16739-F07|Kate Perez|BIN Taxonomy Match|BOLD:AAJ2130  
Limnophyes habilis|BIOUG16782-D08|Kate Perez|BIN Taxonomy Match|BOLD:AAJ2130  
Limnophyes habilis|BIOUG16720-E12|Kate Perez|BIN Taxonomy Match|BOLD:AAJ2130  
Limnophyes habilis|BIOUG16784-E02|Kate Perez|BIN Taxonomy Match|BOLD:AAJ2130  
Limnophyes habilis|BIOUG16739-D08|Kate Perez|BIN Taxonomy Match|BOLD:AAJ2130  
Limnophyes habilis|BIOUG16739-B06|Kate Perez|BIN Taxonomy Match|BOLD:AAJ2130  
Limnophyes habilis|BIOUG15855-G06|Kate Perez|BIN Taxonomy Match|BOLD:AAJ2130  
Limnophyes habilis|BIOUG16778-B12|Kate Perez|BIN Taxonomy Match|BOLD:AAJ2130  
Limnophyes habilis|BIOUG16776-C03|Kate Perez|BIN Taxonomy Match|BOLD:AAJ2130  
Limnophyes habilis|BIOUG16739-C04|Kate Perez|BIN Taxonomy Match|BOLD:AAJ2130  
Limnophyes habilis|BIOUG16782-A08|Kate Perez|BIN Taxonomy Match|BOLD:AAJ2130  
Limnophyes habilis|BIOUG16894-B09|Kate Perez|BIN Taxonomy Match|BOLD:AAJ2130  
Limnophyes habilis|BIOUG16738-A03|Kate Perez|BIN Taxonomy Match|BOLD:AAJ2130  
Limnophyes habilis|BIOUG16779-D08|Kate Perez|BIN Taxonomy Match|BOLD:AAJ2130  
Limnophyes habilis|BIOUG16739-H01|Kate Perez|BIN Taxonomy Match|BOLD:AAJ2130  
Limnophyes habilis|BIOUG16857-C04|Kate Perez|BIN Taxonomy Match|BOLD:AAJ2130  
Limnophyes habilis|BIOUG16739-D05|Kate Perez|BIN Taxonomy Match|BOLD:AAJ2130  
Limnophyes habilis|BIOUG16784-A03|Kate Perez|BIN Taxonomy Match|BOLD:AAJ2130  
Limnophyes habilis|BIOUG16783-C03|Kate Perez|BIN Taxonomy Match|BOLD:AAJ2130  
Limnophyes habilis|BIOUG16778-B08|Kate Perez|BIN Taxonomy Match|BOLD:AAJ2130  
Limnophyes habilis|BIOUG16778-C12|Kate Perez|BIN Taxonomy Match|BOLD:AAJ2130  
Limnophyes habilis|BIOUG16298-B10|Kate Perez|BIN Taxonomy Match|BOLD:AAJ2130  
Limnophyes habilis|BIOUG15799-F08|Kate Perez|BIN Taxonomy Match|BOLD:AAJ2130  
Limnophyes habilis|BIOUG16775-G02|Kate Perez|BIN Taxonomy Match|BOLD:AAJ2130  
Limnophyes habilis|BIOUG16721-D01|Kate Perez|BIN Taxonomy Match|BOLD:AAJ2130  
Limnophyes habilis|BIOUG16785-E04|Kate Perez|BIN Taxonomy Match|BOLD:AAJ2130  
Limnophyes habilis|BIOUG16783-G09|Kate Perez|BIN Taxonomy Match|BOLD:AAJ2130  
Limnophyes habilis|BIOUG16783-E03|Kate Perez|BIN Taxonomy Match|BOLD:AAJ2130  
Limnophyes habilis|BIOUG16854-G02|Kate Perez|BIN Taxonomy Match|BOLD:AAJ2130  
Limnophyes habilis|BIOUG42658-F10|Kate Perez|BIN Taxonomy Match below Phylum (Jun 2019)|BOL...  
Limnophyes habilis|ZSM-DIP-33132-F10|Caroline Chimeno|BIN Taxonomy Match (Jan 2022)|BOLD ...  
Limnophyes habilis|BIOUG16778-E12|Kate Perez|BIN Taxonomy Match|BOLD:AAJ2130  
Limnophyes habilis|BIOUG16785-F10|Kate Perez|BIN Taxonomy Match|BOLD:AAJ2130  
Limnophyes habilis|BIOUG16855-C02|Kate Perez|BIN Taxonomy Match|BOLD:AAJ2130  
Limnophyes habilis|BIOUG16720-D07|Kate Perez|BIN Taxonomy Match|BOLD:AAJ2130  
Limnophyes habilis|BIOUG16778-D01|Kate Perez|BIN Taxonomy Match|BOLD:AAJ2130  
Limnophyes habilis|BIOUG16854-G08|Kate Perez|BIN Taxonomy Match|BOLD:AAJ2130  
Limnophyes habilis|BIOUG16783-F01|Kate Perez|BIN Taxonomy Match|BOLD:AAJ2130



Limnophyes habilis|BIOUG16774-A03|Kate Perez|BIN Taxonomy Match|BOLD:AAJ2130  
 Limnophyes habilis|BIOUG16738-B05|Kate Perez|BIN Taxonomy Match|BOLD:AAJ2130  
 Limnophyes habilis|BIOUG16782-A06|Kate Perez|BIN Taxonomy Match|BOLD:AAJ2130  
 Limnophyes habilis|BIOUG16893-C02|Kate Perez|BIN Taxonomy Match|BOLD:AAJ2130  
 Limnophyes habilis|BIOUG16783-H05|Kate Perez|BIN Taxonomy Match|BOLD:AAJ2130  
 Limnophyes habilis|BIOUG16782-G05|Kate Perez|BIN Taxonomy Match|BOLD:AAJ2130  
 Limnophyes habilis|BIOUG16859-G06|Kate Perez|BIN Taxonomy Match|BOLD:AAJ2130  
 Limnophyes habilis|BIOUG16738-G09|Kate Perez|BIN Taxonomy Match|BOLD:AAJ2130  
 Limnophyes habilis|BIOUG16740-G06|Kate Perez|BIN Taxonomy Match|BOLD:AAJ2130  
 Limnophyes habilis|BIOUG16777-B03|Kate Perez|BIN Taxonomy Match|BOLD:AAJ2130  
 Limnophyes habilis|BIOUG16776-C10|Kate Perez|BIN Taxonomy Match|BOLD:AAJ2130  
 Limnophyes habilis|BIOUG16892-E02|Kate Perez|BIN Taxonomy Match|BOLD:AAJ2130  
 Limnophyes habilis|BIOUG16778-A03|Kate Perez|BIN Taxonomy Match|BOLD:AAJ2130  
 Limnophyes habilis|BIOUG16854-A01|Kate Perez|BIN Taxonomy Match|BOLD:AAJ2130  
 Limnophyes habilis|BIOUG16740-C03|Kate Perez|BIN Taxonomy Match|BOLD:AAJ2130  
 Limnophyes habilis|BIOUG16859-C03|Kate Perez|BIN Taxonomy Match|BOLD:AAJ2130  
 Limnophyes habilis|BIOUG16775-A03|Kate Perez|BIN Taxonomy Match|BOLD:AAJ2130  
 Limnophyes habilis|BIOUG16738-C09|Kate Perez|BIN Taxonomy Match|BOLD:AAJ2130  
 Limnophyes habilis|BIOUG16720-A03|Kate Perez|BIN Taxonomy Match|BOLD:AAJ2130  
 Limnophyes habilis|BC-ZSM-DIP-22491-D03|Dieter Doczka||BOLD:AAJ2130  
 Limnophyes habilis|BIOUG06088-C10|Kate Perez|BIN Taxonomy Match|BOLD:AAJ2130  
 Limnophyes habilis|BIOUG06086-F07|Kate Perez|BIN Taxonomy Match|BOLD:AAJ2130  
 Limnophyes habilis|BIOUG16594-H05|Kate Perez|BIN Taxonomy Match|BOLD:AAJ2130  
 Limnophyes habilis|BIOUG16434-C05|Kate Perez|BIN Taxonomy Match|BOLD:AAJ2130  
 Limnophyes habilis|BIOUG15966-D03|Kate Perez|BIN Taxonomy Match|BOLD:AAJ2130  
 Limnophyes habilis|BIOUG16782-D10|Kate Perez|BIN Taxonomy Match|BOLD:AAJ2130  
 Limnophyes habilis|BIOUG16738-H01|Kate Perez|BIN Taxonomy Match|BOLD:AAJ2130  
 Limnophyes habilis|BIOUG16632-A07|Kate Perez|BIN Taxonomy Match|BOLD:AAJ2130  
 Limnophyes habilis|BIOUG16476-B09|Kate Perez|BIN Taxonomy Match|BOLD:AAJ2130  
 Limnophyes habilis|BIOUG16711-B06|Kate Perez|BIN Taxonomy Match|BOLD:AAJ2130  
 Limnophyes habilis|BIOUG16713-A07|Kate Perez|BIN Taxonomy Match|BOLD:AAJ2130  
 Limnophyes habilis|BIOUG16332-H10|Kate Perez|BIN Taxonomy Match|BOLD:AAJ2130  
 Limnophyes habilis|BIOUG04119-B09|Kate Perez|BIN Taxonomy Match|BOLD:AAJ2130  
 Limnophyes habilis|BIOUG15807-H10|Kate Perez|BIN Taxonomy Match|BOLD:AAJ2130  
 Limnophyes habilis|BIOUG15967-C10|Kate Perez|BIN Taxonomy Match|BOLD:AAJ2130  
 Limnophyes habilis|BIOUG16893-A07|Kate Perez|BIN Taxonomy Match|BOLD:AAJ2130  
 Limnophyes habilis|BIOUG42665-A01|Kate Perez|BIN Taxonomy Match below Phylum (Jun 2019)|BOL...  
 Limnophyes habilis|BIOUG16594-F12|Kate Perez|BIN Taxonomy Match|BOLD:AAJ2130  
 Limnophyes habilis|BIOUG15764-D11|Kate Perez|BIN Taxonomy Match|BOLD:AAJ2130  
 Limnophyes habilis|BIOUG15951-C11|Kate Perez|BIN Taxonomy Match|BOLD:AAJ2130  
 Limnophyes habilis|BIOUG15762-E06|Kate Perez|BIN Taxonomy Match|BOLD:AAJ2130  
 Limnophyes habilis|BIOUG15763-E09|Kate Perez|BIN Taxonomy Match|BOLD:AAJ2130  
 Limnophyes bidumus|ES1168|Elisabeth Stur||BOLD:AAJ2137  
**Limnophyes sp. 11ES|Finmark585|Elisabeth Stur||BOLD:AAU5475**  
 Limnophyes sp. 3SW|CCDB21605-E10|Sofia Wiedenbrug||BOLD:ACC0450  
 Limnophyes|BIOUG04114-G08|Kate Perez|BIN Taxonomy Match|BOLD:ACC0450  
 Limnophyes sp. 3SW|CCDB21606-E02|Sofia Wiedenbrug||BOLD:ACC0450  
 Limnophyes|BIOUG04119-A06|Kate Perez|BIN Taxonomy Match|BOLD:ACC0450  
 Limnophyes|BIOUG04090-C07|Kate Perez|BIN Taxonomy Match|BOLD:ACC0450  
 Limnophyes aagaardii|ZMUO.025837|Lauri Paasivirta||BOLD:ACC0450  
 Limnophyes|BIOUG04090-D09|Kate Perez|BIN Taxonomy Match|BOLD:ACC0450  
 Limnophyes|BIOUG04366-A11|Kate Perez|BIN Taxonomy Match|BOLD:ACC0450  
 Limnophyes|BIOUG04119-A02|Kate Perez|BIN Taxonomy Match|BOLD:ACC0450  
 Limnophyes|BIOUG04114-E08|Kate Perez|BIN Taxonomy Match|BOLD:ACC0450  
 Limnophyes|BIOUG04114-F12|Kate Perez|BIN Taxonomy Match|BOLD:ACC0450  
 Limnophyes|BIOUG04090-D04|Kate Perez|BIN Taxonomy Match|BOLD:ACC0450  
 Limnophyes|BIOUG04114-E06|Kate Perez|BIN Taxonomy Match|BOLD:ACC0450  
 Limnophyes|BIOUG04090-E12|Kate Perez|BIN Taxonomy Match|BOLD:ACC0450  
 Limnophyes|BIOUG04212-E09|Kate Perez|BIN Taxonomy Match|BOLD:ACC0450  
 Limnophyes|GBOL11542|Sofia Wiedenbrug||BOLD:ACV9879  
 Limnophyes sp. 7ES|ZSM-DIP-33137-C03|Caroline Chimento|BIN Taxonomy Match (Jan 2022)|BOLD ...  
 Limnophyes sp. 7ES|ZSM-DIP-33137-C07|Caroline Chimento|BIN Taxonomy Match (Jan 2022)|BOLD ...  
 Orthocladinae|CCDB24228-C11|Sofia Wiedenbrug|BIN Taxonomy Match|BOLD:AAJ2129  
 Orthocladinae|CCDB22605-H09|Sofia Wiedenbrug|99.65% L. 7ES, shallow humeral pit with two l...  
 Limnophyes sp. 8SW|ZSM-DIP-33135-D05|Caroline Chimento|BIN Taxonomy Match (Jan 2022)|BOLD ...  
 Limnophyes sp. 8SW|ZSM-DIP-33145-F02|Caroline Chimento|BIN Taxonomy Match (Jan 2022)|BOLD ...  
 Limnophyes sp. 8SW|ZSM-DIP-33135-D03|Caroline Chimento|BIN Taxonomy Match (Jan 2022)|BOLD ...  
 Limnophyes sp. 8SW|ZSM-DIP-33130-E01|Caroline Chimento|BIN Taxonomy Match (Jan 2022)|BOLD ...  
 Limnophyes sp. 8SW|CCDB24183-A11|Sofia Wiedenbrug|Morphology|BOLD:ACJ0628  
 Limnophyes sp. 8SW|BIOUG07929-E02|Sofia Wiedenbrug|BIN Taxonomy Match|BOLD:ACJ0628  
 Limnophyes sp. 8SW|BIOUG08126-H05|Sofia Wiedenbrug|BIN Taxonomy Match|BOLD:ACJ0628  
**Limnophyes sp. 5ES|ATNA231|Elisabeth Stur||BOLD:AAD1721**  
 Limnophyes asquamatus|ZMUO.024296|Lauri Paasivirta||BOLD:AAQ0626  
 Limnophyes|ZSM-DIP-33145-F06|Caroline Chimento|BIN Taxonomy Match (Jan 2022)|BOLD:AAQ0626  
 Limnophyes asquamatus|ZSM-DIP-33135-D08|Caroline Chimento|BIN Taxonomy Match (Jan 2022)|BOLD...  
 Limnophyes asquamatus|ZSM-DIP-33134-C11|Caroline Chimento|BIN Taxonomy Match (Jan 2022)|BOLD...  
 Limnophyes asquamatus|ZSM-DIP-33134-C08|Caroline Chimento|BIN Taxonomy Match (Jan 2022)|BOLD...  
 Limnophyes asquamatus|ZSM-DIP-33134-C05|Caroline Chimento|BIN Taxonomy Match (Jan 2022)|BOLD...  
 Limnophyes asquamatus|ZSM-DIP-33149-A09|Caroline Chimento|BIN Taxonomy Match (Jan 2022)|BOLD...  
 Limnophyes asquamatus|ZSM-DIP-33135-D07|Caroline Chimento|BIN Taxonomy Match (Jan 2022)|BOLD...  
 Limnophyes asquamatus|ZSM-DIP-33134-C07|Caroline Chimento|BIN Taxonomy Match (Jan 2022)|BOLD...  
 Limnophyes NHRS sp. C|NHRS-BYWS00000233|Yngve Brodin|morphology|BOLD:AAQ0626  
 Limnophyes asquamatus|ZSM-DIP-33149-B03|Caroline Chimento|BIN Taxonomy Match (Jan 2022)|BOLD...  
 Limnophyes asquamatus|ZSM-DIP-33145-F07|Caroline Chimento|BIN Taxonomy Match (Jan 2022)|BOLD...  
 Limnophyes asquamatus|ZSM-DIP-33148-D09|Caroline Chimento|BIN Taxonomy Match (Jan 2022)|BOLD...  
 Limnophyes asquamatus|ZSM-DIP-33135-C10|Caroline Chimento|BIN Taxonomy Match (Jan 2022)|BOLD...  
 Limnophyes asquamatus|ZSM-DIP-33134-C12|Caroline Chimento|BIN Taxonomy Match (Jan 2022)|BOLD...  
 Limnophyes asquamatus|ZSM-DIP-33134-C10|Caroline Chimento|BIN Taxonomy Match (Jan 2022)|BOLD...  
 Limnophyes|ZSM-DIP-33148-D11|Caroline Chimento|BIN Taxonomy Match (Jan 2022)|BOLD:AAQ0626  
 Limnophyes asquamatus|ZSM-DIP-33134-C09|Caroline Chimento|BIN Taxonomy Match (Jan 2022)|BOLD...  
 Limnophyes sp. 17S|NO 102|Elisabeth Stur|morphology|BOLD:AAQ0626  
 Limnophyes vrangelensis|Finmark107|Elisabeth Stur||BOLD:AAM6308  
 Limnophyes schnelli|24464-D03|Kate Perez|BIN Taxonomy Match|BOLD:AAC9278  
 Limnophyes schnelli|24417-D08|Kate Perez|BIN Taxonomy Match|BOLD:AAC9278  
 Limnophyes schnelli|24354-E01|Kate Perez|BIN Taxonomy Match|BOLD:AAC9278  
 Limnophyes schnelli|24373-D09|Kate Perez|BIN Taxonomy Match|BOLD:AAC9278  
 Limnophyes schnelli|25132-G08|Kate Perez|BOLD ID Engine Manual (Apr 2018)|BOLD:AAC9278  
 Limnophyes schnelli|ZMUO.026256|Lauri Paasivirta||BOLD:AAC9278  
 Limnophyes schnelli|ZMUO.026255|Lauri Paasivirta||BOLD:AAC9278  
 Limnophyes schnelli|Finmark368|Elisabeth Stur||BOLD:AAC9278  
 Limnophyes schnelli|Finmark362|Elisabeth Stur||BOLD:AAC9278  
 Limnophyes cf. asquamatus|Finmark366|Elisabeth Stur||BOLD:ACH0039  
 Limnophyes cf. asquamatus|CCDB21606-H06|Sofia Wiedenbrug||BOLD:ACT5780

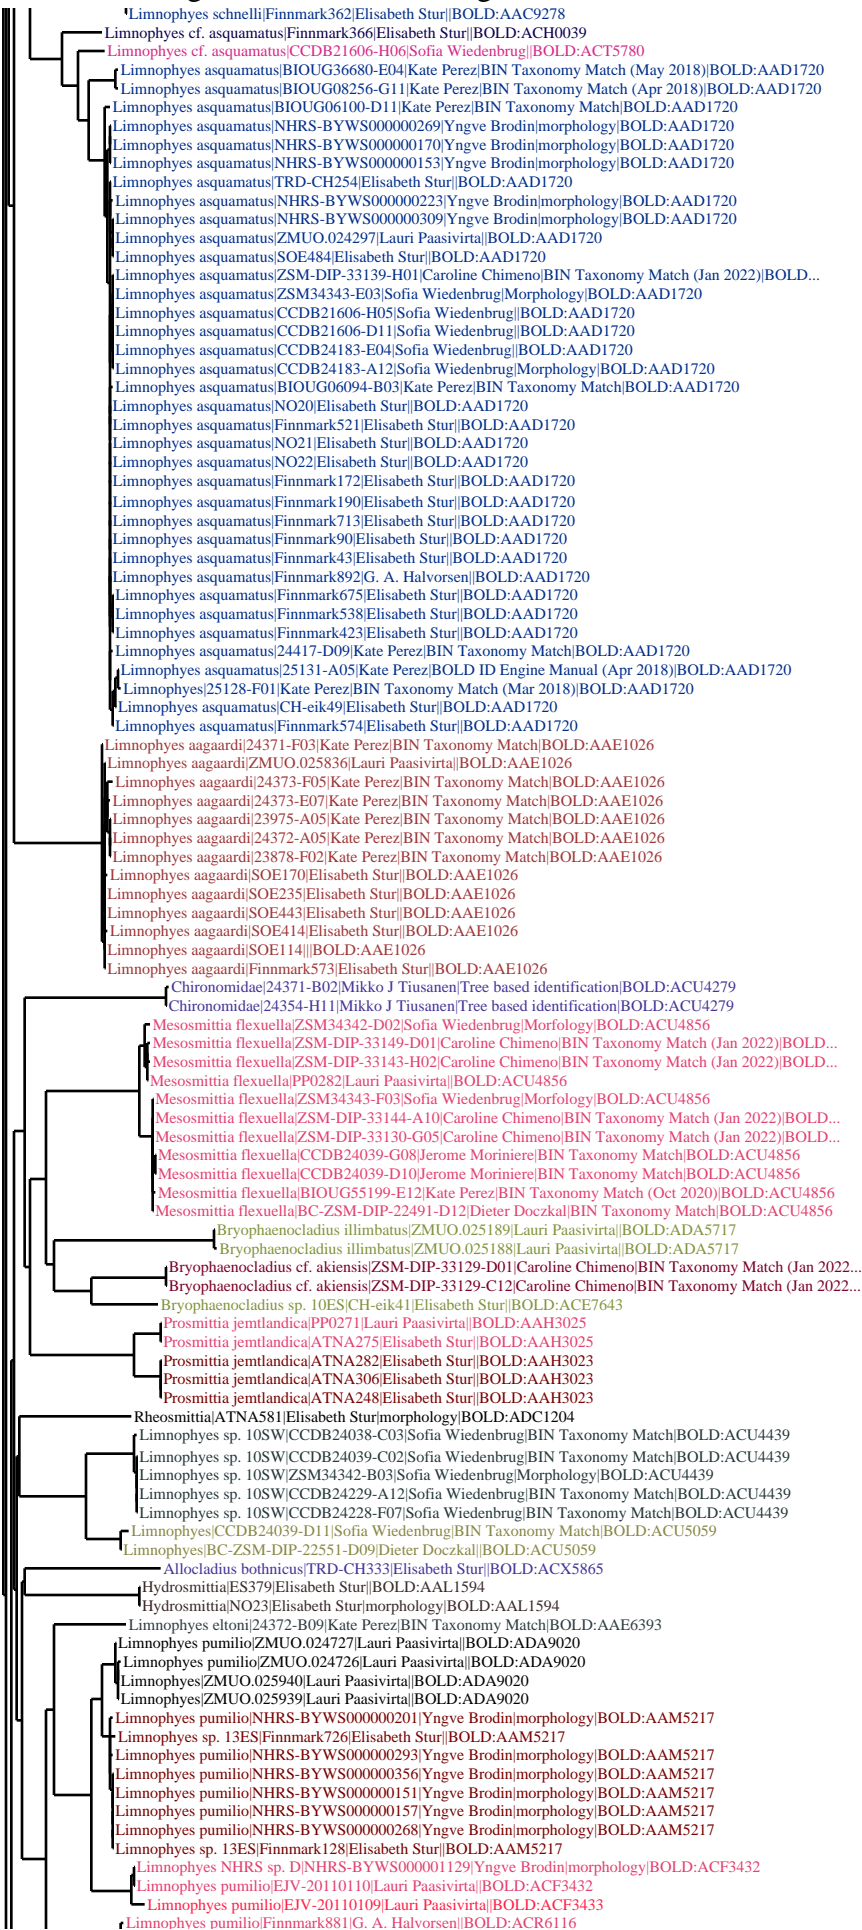

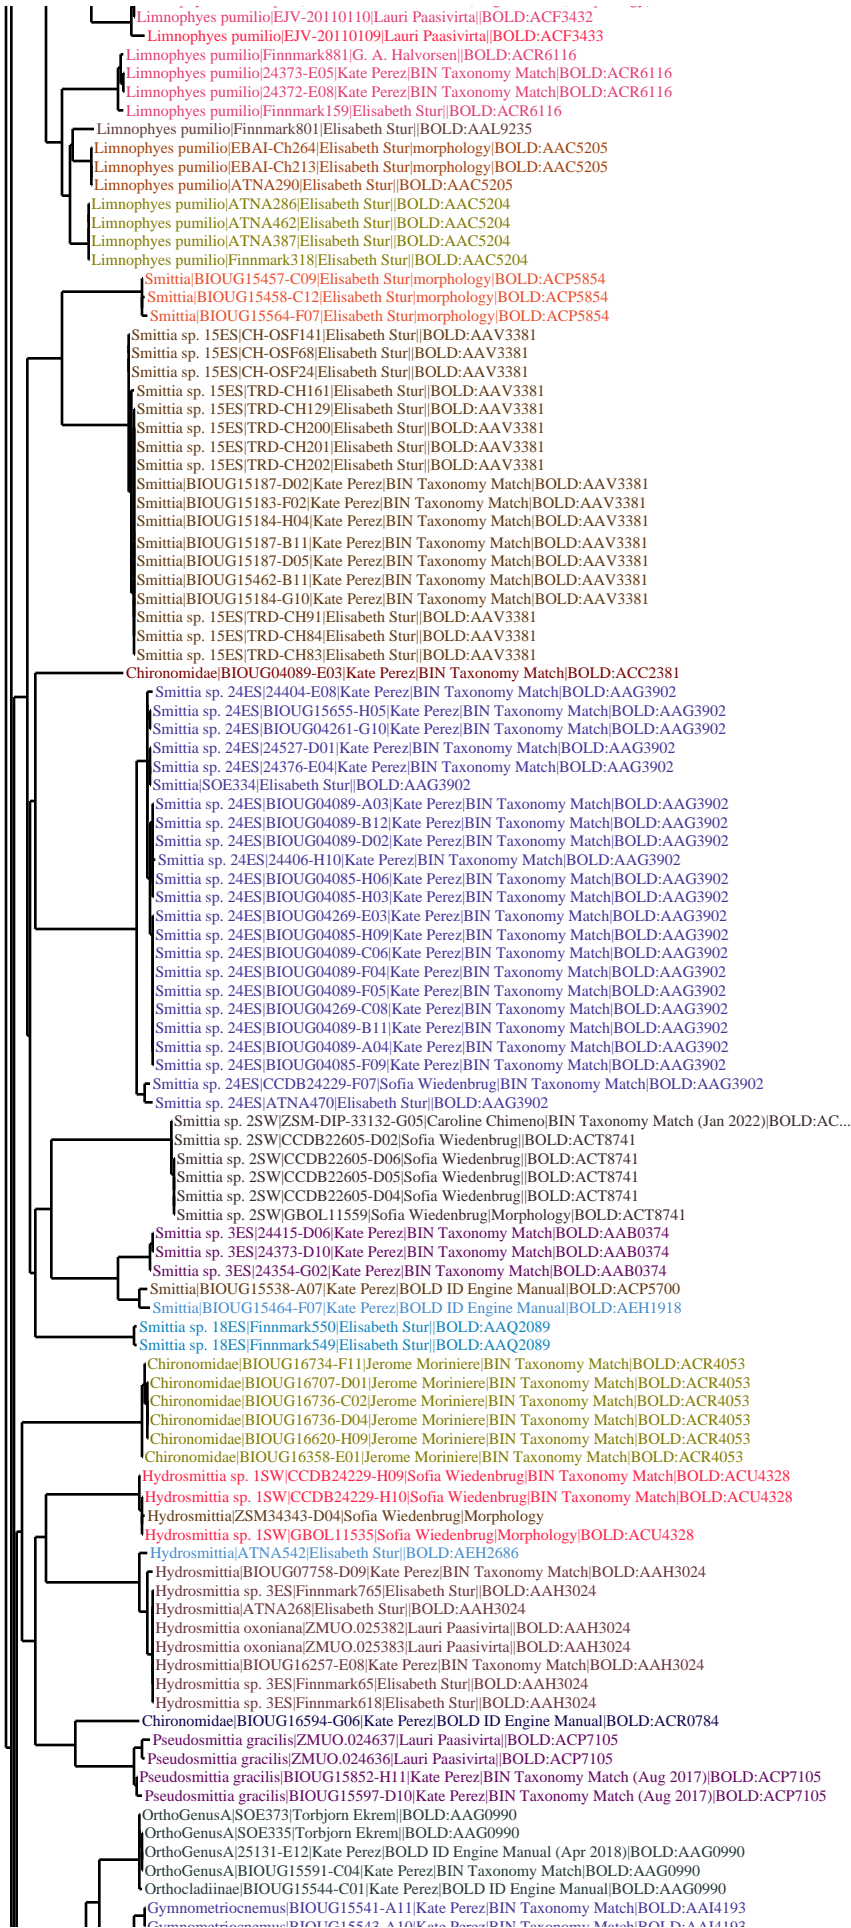

Orthocladinae|BIOUG15544-C01|Kate Perez|BOLD ID Engine Manual|BOLD:AAG0990  
Gymnometricnemus|BIOUG15541-A11|Kate Perez|BIN Taxonomy Match|BOLD:AAI4193  
Gymnometricnemus|BIOUG15543-A10|Kate Perez|BIN Taxonomy Match|BOLD:AAI4193  
Gymnometricnemus|BIOUG15597-F11|Kate Perez|BIN Taxonomy Match|BOLD:AAI4193  
Gymnometricnemus|BIOUG05483-A04|Kate Perez|BIN Taxonomy Match|BOLD:AAI4193  
Gymnometricnemus|BIOUG15457-A05|Kate Perez|BIN Taxonomy Match|BOLD:AAI4193  
Gymnometricnemus|BIOUG15537-B02|Kate Perez|BIN Taxonomy Match|BOLD:AAI4193  
Gymnometricnemus|BIOUG15543-C05|Kate Perez|BIN Taxonomy Match|BOLD:AAI4193  
Gymnometricnemus|BIOUG15458-A11|Kate Perez|BIN Taxonomy Match|BOLD:AAI4193  
OrthoGenusA|SOE339|Torbjorn Ekrem  
Gymnometricnemus|BIOUG15562-B08|Kate Perez|BIN Taxonomy Match|BOLD:AAI4193  
Gymnometricnemus|BIOUG15536-D10|Kate Perez|BIN Taxonomy Match|BOLD:AAI4193  
Gymnometricnemus|BIOUG15543-F01|Kate Perez|BIN Taxonomy Match|BOLD:AAI4193  
Gymnometricnemus|BIOUG15544-A07|Kate Perez|BIN Taxonomy Match|BOLD:AAI4193  
Gymnometricnemus|BIOUG15542-H05|Kate Perez|BIN Taxonomy Match|BOLD:AAI4193  
Gymnometricnemus|BIOUG15463-F06|Kate Perez|BIN Taxonomy Match|BOLD:AAI4193  
Gymnometricnemus|BIOUG15562-B02|Kate Perez|BIN Taxonomy Match|BOLD:AAI4193  
Gymnometricnemus|BIOUG15563-E11|Kate Perez|BIN Taxonomy Match|BOLD:AAI4193  
Gymnometricnemus|BIOUG15454-B07|Kate Perez|BIN Taxonomy Match|BOLD:AAI4193  
Gymnometricnemus|BIOUG15541-D10|Kate Perez|BIN Taxonomy Match|BOLD:AAI4193  
Gymnometricnemus|BIOUG15541-E12|Kate Perez|BIN Taxonomy Match|BOLD:AAI4193  
Gymnometricnemus|BIOUG15538-F11|Kate Perez|BIN Taxonomy Match|BOLD:AAI4193  
Gymnometricnemus|BIOUG15539-B09|Kate Perez|BIN Taxonomy Match|BOLD:AAI4193  
Gymnometricnemus|BIOUG15539-C10|Kate Perez|BIN Taxonomy Match|BOLD:AAI4193  
Gymnometricnemus|BIOUG15538-B07|Kate Perez|BIN Taxonomy Match|BOLD:AAI4193  
Gymnometricnemus|BIOUG15539-C02|Kate Perez|BIN Taxonomy Match|BOLD:AAI4193  
Gymnometricnemus|BIOUG15562-B03|Kate Perez|BIN Taxonomy Match|BOLD:AAI4193  
Gymnometricnemus|BIOUG15545-E02|Kate Perez|BIN Taxonomy Match|BOLD:AAI4193  
Gymnometricnemus|BIOUG15464-B02|Kate Perez|BIN Taxonomy Match|BOLD:AAI4193  
Gymnometricnemus|BIOUG15561-B05|Kate Perez|BIN Taxonomy Match|BOLD:AAI4193  
Gymnometricnemus|BIOUG15458-B01|Kate Perez|BIN Taxonomy Match|BOLD:AAI4193  
Gymnometricnemus|BIOUG15458-C04|Kate Perez|BIN Taxonomy Match|BOLD:AAI4193  
Gymnometricnemus|BIOUG15853-G06|Kate Perez|BIN Taxonomy Match|BOLD:AAI4193  
Gymnometricnemus|BIOUG15542-G11|Kate Perez|BIN Taxonomy Match|BOLD:AAI4193  
Gymnometricnemus|BIOUG15536-G09|Kate Perez|BIN Taxonomy Match|BOLD:AAI4193  
Gymnometricnemus|BIOUG15536-D05|Kate Perez|BIN Taxonomy Match|BOLD:AAI4193  
Gymnometricnemus|BIOUG15675-G10|Kate Perez|BIN Taxonomy Match|BOLD:AAI4193  
Gymnometricnemus|BIOUG15564-G12|Kate Perez|BIN Taxonomy Match|BOLD:AAI4193  
Gymnometricnemus|BIOUG15597-F10|Kate Perez|BIN Taxonomy Match|BOLD:AAI4193  
Gymnometricnemus|BIOUG15459-D09|Kate Perez|BIN Taxonomy Match|BOLD:AAI4193  
Gymnometricnemus|BIOUG15459-E02|Kate Perez|BIN Taxonomy Match|BOLD:AAI4193  
Gymnometricnemus|BIOUG15460-A10|Kate Perez|BIN Taxonomy Match|BOLD:AAI4193  
Gymnometricnemus|BIOUG15562-G09|Kate Perez|BIN Taxonomy Match|BOLD:AAI4193  
Gymnometricnemus|BIOUG15598-H02|Kate Perez|BIN Taxonomy Match|BOLD:AAI4193  
Gymnometricnemus|BIOUG15542-E01|Kate Perez|BIN Taxonomy Match|BOLD:AAI4193  
Gymnometricnemus|BIOUG15564-E03|Kate Perez|BIN Taxonomy Match|BOLD:AAI4193  
Gymnometricnemus|BIOUG15459-F05|Kate Perez|BIN Taxonomy Match|BOLD:AAI4193  
Gymnometricnemus|BIOUG15465-G04|Kate Perez|BIN Taxonomy Match|BOLD:AAI4193  
Orthocladinae|BIOUG43083-D05|Kate Perez|BIN Taxonomy Match below Phylum (May 2019)|BOLD ...  
Orthocladinae|BIOUG43083-C11|Kate Perez|BIN Taxonomy Match below Phylum (May 2019)|BOLD ...  
Orthocladinae|BIOUG43075-H02|Kate Perez|BIN Taxonomy Match below Phylum (Jun 2019)|BOLD ...  
Orthocladinae|BIOUG42964-G04|Kate Perez|BIN Taxonomy Match below Phylum (Jun 2019)|BOLD ...  
Orthocladinae|BIOUG42963-D11|Kate Perez|BIN Taxonomy Match below Phylum (Jun 2019)|BOLD ...  
Orthocladinae|BIOUG42963-B04|Kate Perez|BIN Taxonomy Match below Phylum (Jun 2019)|BOLD ...  
Orthocladinae|BIOUG42960-C11|Kate Perez|BIN Taxonomy Match below Phylum (Jun 2019)|BOLD ...  
Orthocladinae|BIOUG54161-B02|Stefan Schmidt|BIN Taxonomy Match (Sep 2020)|BOLD:ABU5526  
Parasmittia carinata|ZSM34342-F01|Sofia Wiedenbrug|BOLD:ADC3841  
Heterotrissocladius|CCDB22603-A08|Sofia Wiedenbrug|BOLD:ACQ4005  
Parasmittia carinata|BIOUG04089-G07|Kate Perez|BIN Taxonomy Match (Aug 2017)|BOLD:ACC0435  
Parasmittia carinata|BIOUG04089-G06|Kate Perez|BIN Taxonomy Match (Aug 2017)|BOLD:ACC0435  
Parasmittia carinata|ZMUO.024779|Lauri Paasivirta|BOLD:ACC0435  
Parasmittia carinata|BIOUG04089-H08|Kate Perez|BIN Taxonomy Match (Aug 2017)|BOLD:ACC0435  
Parasmittia carinata|BIOUG04089-G04|Kate Perez|BIN Taxonomy Match (Aug 2017)|BOLD:ACC0435  
Parasmittia carinata|BIOUG04089-C10|Kate Perez|BIN Taxonomy Match (Aug 2017)|BOLD:ACC0435  
Parasmittia carinata|BIOUG04085-H08|Kate Perez|BIN Taxonomy Match (Aug 2017)|BOLD:ACC0435  
Gymnometricnemus|24355-C12|Kate Perez|BIN Taxonomy Match|BOLD:ACF6807  
Gymnometricnemus|24406-D06|Kate Perez|BIN Taxonomy Match|BOLD:ACF6807  
Gymnometricnemus|24539-H02|Kate Perez|BIN Taxonomy Match|BOLD:ACF6807  
Gymnometricnemus|BIOUG05485-F03|Kate Perez|BIN Taxonomy Match|BOLD:ACF6807  
Gymnometricnemus|BIOUG15537-D08|Kate Perez|BIN Taxonomy Match|BOLD:AAI4195  
Gymnometricnemus|BIOUG06058-G07|Kate Perez|BIN Taxonomy Match|BOLD:AAI4195  
Gymnometricnemus|BIOUG15464-D02|Kate Perez|BIN Taxonomy Match|BOLD:AAI4195  
Gymnometricnemus|BIOUG15539-F12|Kate Perez|BIN Taxonomy Match|BOLD:AAI4195  
Gymnometricnemus|BIOUG15545-D05|Kate Perez|BIN Taxonomy Match|BOLD:AAI4195  
Gymnometricnemus|BIOUG15456-D10|Kate Perez|BIN Taxonomy Match|BOLD:AAI4195  
Gymnometricnemus|BIOUG15460-B07|Kate Perez|BIN Taxonomy Match|BOLD:AAI4195  
Gymnometricnemus|BIOUG15460-E10|Kate Perez|BIN Taxonomy Match|BOLD:AAI4195  
Gymnometricnemus|BIOUG15544-B04|Kate Perez|BIN Taxonomy Match|BOLD:AAI4195  
Gymnometricnemus|BIOUG15455-A10|Kate Perez|BIN Taxonomy Match|BOLD:AAI4195  
Gymnometricnemus|24336-A04|Kate Perez|BIN Taxonomy Match|BOLD:AAI4195  
Gymnometricnemus|BIOUG15654-B09|Kate Perez|BIN Taxonomy Match|BOLD:AAI4195  
Gymnometricnemus|BIOUG15455-C07|Kate Perez|BIN Taxonomy Match|BOLD:AAI4195  
Gymnometricnemus|BIOUG15454-H06|Kate Perez|BIN Taxonomy Match|BOLD:AAI4195  
Gymnometricnemus|BIOUG15459-H03|Kate Perez|BIN Taxonomy Match|BOLD:AAI4195  
Gymnometricnemus|24538-G05|Kate Perez|BIN Taxonomy Match|BOLD:AAI4195  
Gymnometricnemus|BIOUG15537-F02|Kate Perez|BIN Taxonomy Match|BOLD:AAI4195  
Gymnometricnemus|BIOUG15465-E08|Kate Perez|BIN Taxonomy Match|BOLD:AAI4195  
Gymnometricnemus|BIOUG15536-C08|Kate Perez|BIN Taxonomy Match|BOLD:AAI4195  
Gymnometricnemus|BIOUG15542-B06|Kate Perez|BIN Taxonomy Match|BOLD:AAI4195  
Gymnometricnemus|BIOUG15541-C10|Kate Perez|BIN Taxonomy Match|BOLD:AAI4195  
Gymnometricnemus|BIOUG15538-C10|Kate Perez|BIN Taxonomy Match|BOLD:AAI4195  
Gymnometricnemus|BIOUG15544-A09|Kate Perez|BIN Taxonomy Match|BOLD:AAI4195  
Gymnometricnemus|BIOUG15542-D06|Kate Perez|BIN Taxonomy Match|BOLD:AAI4195  
Gymnometricnemus|BIOUG15538-G02|Kate Perez|BIN Taxonomy Match|BOLD:AAI4195  
Gymnometricnemus|BIOUG15543-D02|Kate Perez|BIN Taxonomy Match|BOLD:AAI4195  
Gymnometricnemus|BIOUG15463-E05|Kate Perez|BIN Taxonomy Match|BOLD:AAI4195  
Gymnometricnemus|BIOUG15538-C02|Kate Perez|BIN Taxonomy Match|BOLD:AAI4195  
Gymnometricnemus|BIOUG15536-H06|Kate Perez|BIN Taxonomy Match|BOLD:AAI4195  
Gymnometricnemus|BIOUG15463-G05|Kate Perez|BIN Taxonomy Match|BOLD:AAI4195  
Gymnometricnemus|BIOUG15539-F11|Kate Perez|BIN Taxonomy Match|BOLD:AAI4195  
Gymnometricnemus|BIOUG15545-D04|Kate Perez|BIN Taxonomy Match|BOLD:AAI4195  
Gymnometricnemus|BIOUG15543-F08|Kate Perez|BIN Taxonomy Match|BOLD:AAI4195









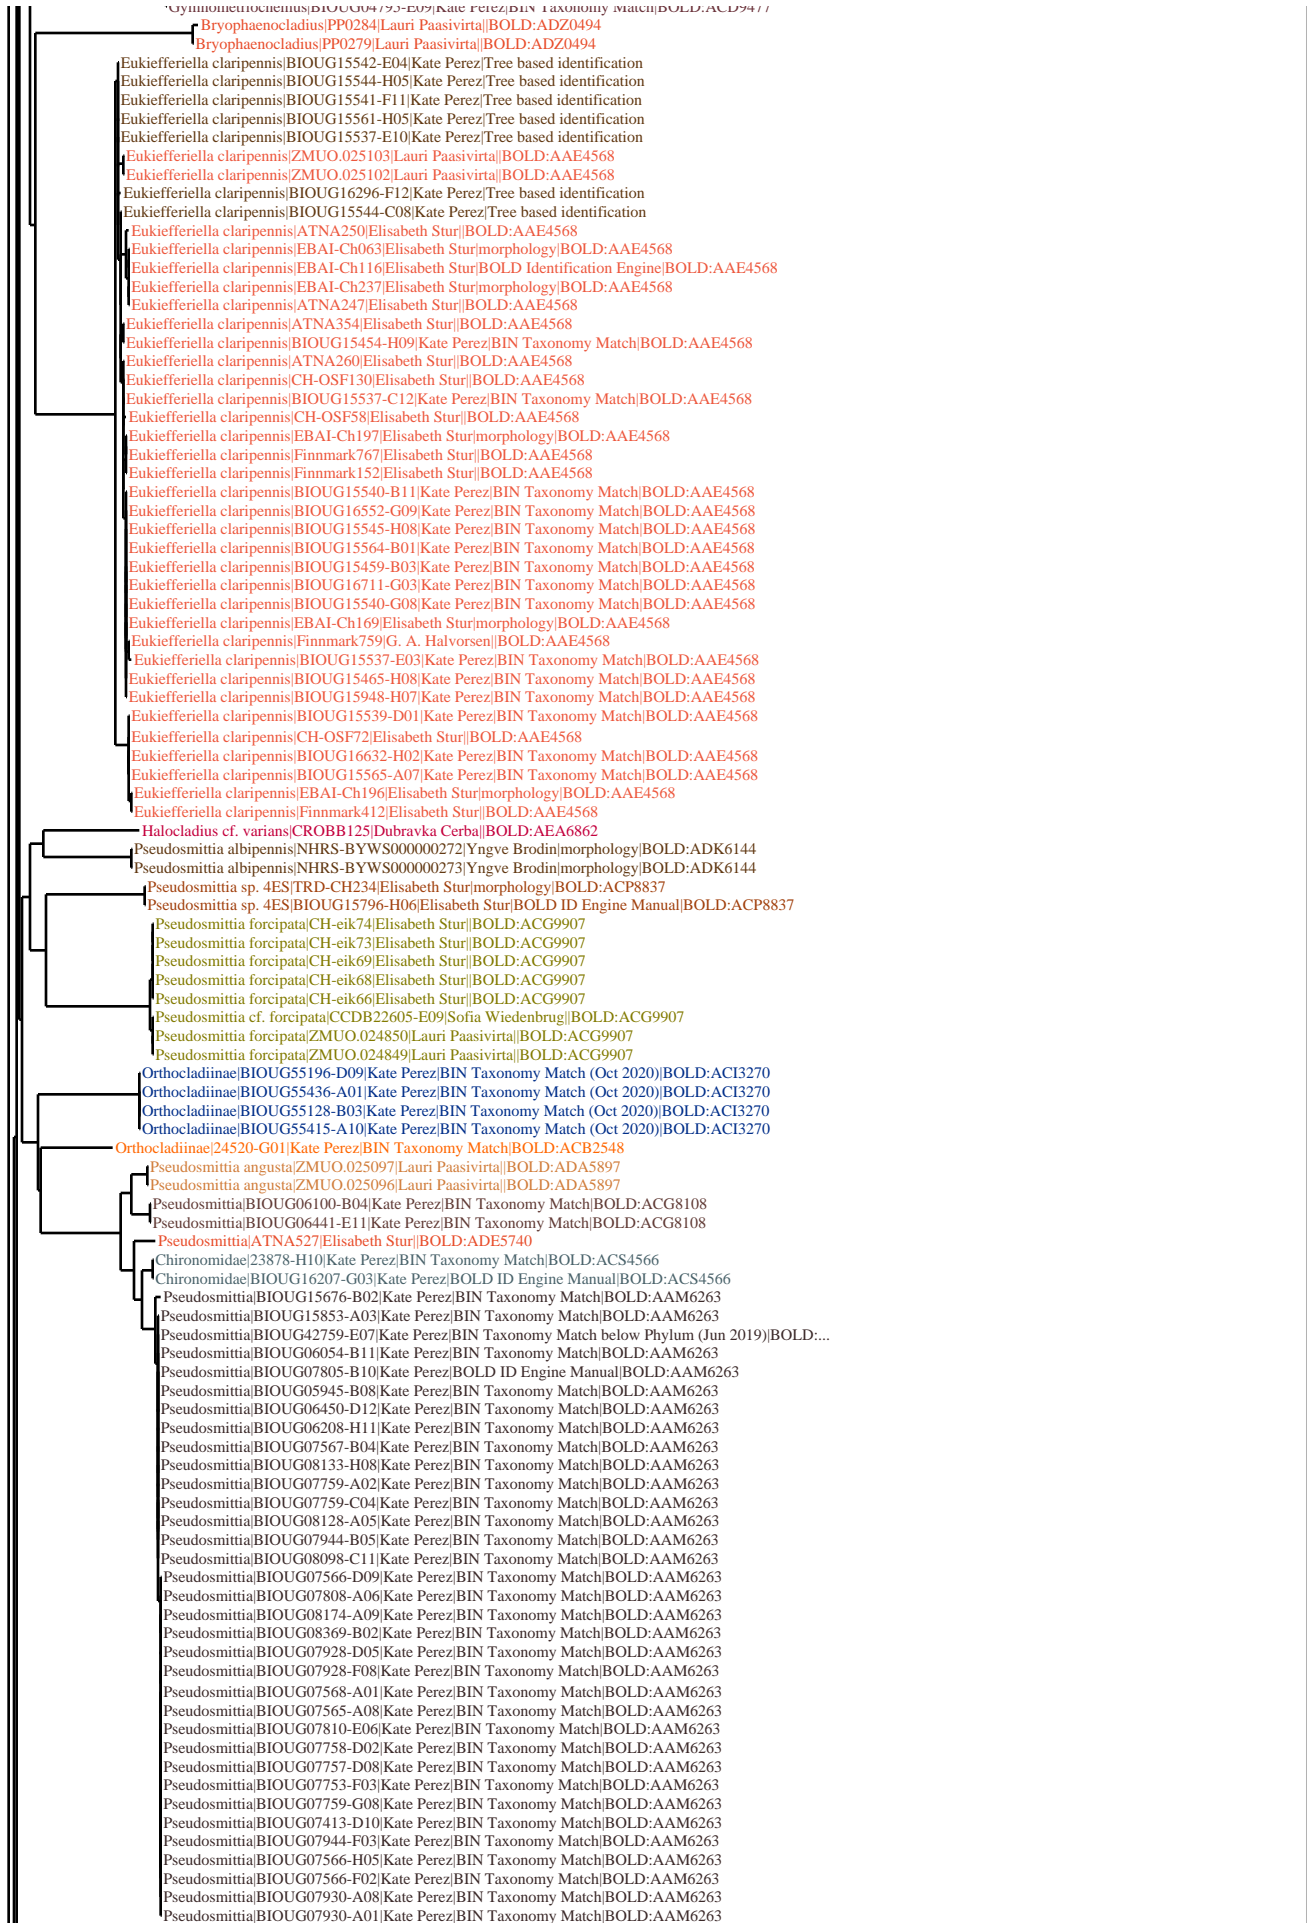

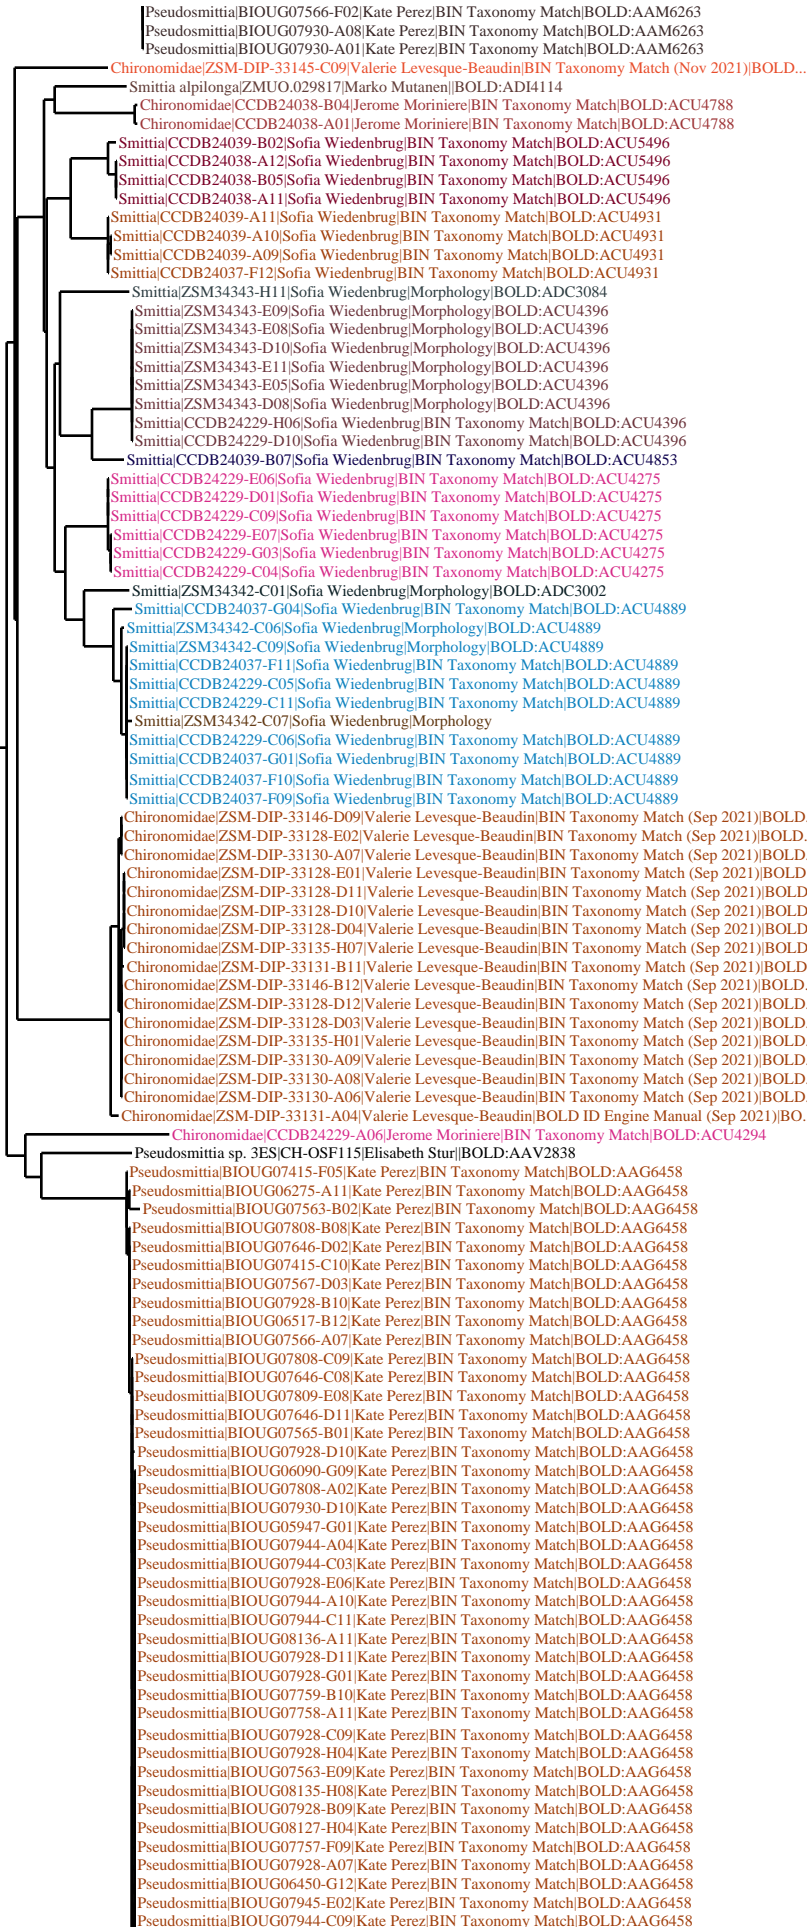

Pseudosmittia|BIOUG06450-G12|Kate Perez|BIN Taxonomy Match|BOLD: AAG6458  
Pseudosmittia|BIOUG07945-E02|Kate Perez|BIN Taxonomy Match|BOLD: AAG6458  
Pseudosmittia|BIOUG07944-C09|Kate Perez|BIN Taxonomy Match|BOLD: AAG6458  
Pseudosmittia|BIOUG07944-D09|Kate Perez|BIN Taxonomy Match|BOLD: AAG6458  
Pseudosmittia|BIOUG07410-B03|Kate Perez|BIN Taxonomy Match|BOLD: AAG6458  
Pseudosmittia|BIOUG07928-G02|Kate Perez|BIN Taxonomy Match|BOLD: AAG6458  
Pseudosmittia|BIOUG08140-D04|Kate Perez|BIN Taxonomy Match|BOLD: AAG6458  
Pseudosmittia|BIOUG07810-G02|Kate Perez|BIN Taxonomy Match|BOLD: AAG6458  
Pseudosmittia|BIOUG07413-F10|Kate Perez|BIN Taxonomy Match|BOLD: AAG6458  
Pseudosmittia|BIOUG07929-F06|Kate Perez|BIN Taxonomy Match|BOLD: AAG6458  
Pseudosmittia|BIOUG07565-G07|Kate Perez|BIN Taxonomy Match|BOLD: AAG6458  
Pseudosmittia|BIOUG07928-F06|Kate Perez|BIN Taxonomy Match|BOLD: AAG6458  
Pseudosmittia|BIOUG08180-D04|Kate Perez|BIN Taxonomy Match|BOLD: AAG6458  
Pseudosmittia|BIOUG07928-F04|Kate Perez|BIN Taxonomy Match|BOLD: AAG6458  
Pseudosmittia|BIOUG05777-F04|Kate Perez|BIN Taxonomy Match|BOLD: AAG6458  
Pseudosmittia|BIOUG07753-C04|Kate Perez|BIN Taxonomy Match|BOLD: AAG6458  
Pseudosmittia|BIOUG07945-B02|Kate Perez|BIN Taxonomy Match|BOLD: AAG6458  
Pseudosmittia|BIOUG07928-B12|Kate Perez|BIN Taxonomy Match|BOLD: AAG6458  
Pseudosmittia|BIOUG07808-F06|Kate Perez|BIN Taxonomy Match|BOLD: AAG6458  
Pseudosmittia albipennis|CH-eik86|Elisabeth Sturj|BOLD: AAG6458  
Pseudosmittia albipennis|CH-eik116|Elisabeth Sturj|BOLD: AAG6458  
Pseudosmittia albipennis|CH-eik133|Elisabeth Sturj|BOLD: AAG6458  
Pseudosmittia|BIOUG07757-E12|Kate Perez|BIN Taxonomy Match|BOLD: AAG6458  
Pseudosmittia|BIOUG07930-G01|Kate Perez|BIN Taxonomy Match|BOLD: AAG6458  
Pseudosmittia|BIOUG07930-F07|Kate Perez|BIN Taxonomy Match|BOLD: AAG6458  
Pseudosmittia|BIOUG07415-H09|Kate Perez|BIN Taxonomy Match|BOLD: AAG6458  
Pseudosmittia|BIOUG07930-F06|Kate Perez|BIN Taxonomy Match|BOLD: AAG6458  
Pseudosmittia|BIOUG08209-F10|Kate Perez|BIN Taxonomy Match|BOLD: AAG6458  
Pseudosmittia|BIOUG07808-C10|Kate Perez|BIN Taxonomy Match|BOLD: AAG6458  
Pseudosmittia|BIOUG07928-C02|Kate Perez|BIN Taxonomy Match|BOLD: AAG6458  
Pseudosmittia|BIOUG07930-A06|Kate Perez|BIN Taxonomy Match|BOLD: AAG6458  
Pseudosmittia|BIOUG06100-A07|Kate Perez|BIN Taxonomy Match|BOLD: AAG6458  
Pseudosmittia|BIOUG07805-A04|Kate Perez|BIN Taxonomy Match|BOLD: AAG6458  
Pseudosmittia|BIOUG08127-F03|Kate Perez|BIN Taxonomy Match|BOLD: AAG6458  
Pseudosmittia|BIOUG07928-A02|Kate Perez|BIN Taxonomy Match|BOLD: AAG6458  
Pseudosmittia albipennis|ZSM-DIP-33146-A12|Caroline Chimeno|BIN Taxonomy Match (Jan 2022)|B...  
Pseudosmittia albipennis|ZSM-DIP-33136-A11|Caroline Chimeno|BIN Taxonomy Match (Jan 2022)|B...  
Pseudosmittia|BIOUG07760-D05|Kate Perez|BIN Taxonomy Match|BOLD: AAG6458  
Pseudosmittia|BIOUG07945-G01|Kate Perez|BIN Taxonomy Match|BOLD: AAG6458  
Pseudosmittia|BIOUG06210-B09|Kate Perez|BIN Taxonomy Match|BOLD: AAG6458  
Pseudosmittia|BIOUG07413-C06|Kate Perez|BIN Taxonomy Match|BOLD: AAG6458  
Pseudosmittia|BIOUG07418-C01|Kate Perez|BIN Taxonomy Match|BOLD: AAG6458  
Pseudosmittia|BIOUG08179-A09|Kate Perez|BIN Taxonomy Match|BOLD: AAG6458  
Pseudosmittia|BIOUG08132-A05|Kate Perez|BIN Taxonomy Match|BOLD: AAG6458  
Pseudosmittia|BIOUG07810-H03|Kate Perez|BIN Taxonomy Match|BOLD: AAG6458  
Pseudosmittia albipennis|CH-eik50|Elisabeth Sturj|BOLD: AAG6458  
Pseudosmittia albipennis|CH-eik51|Elisabeth Sturj|BOLD: AAG6458  
Pseudosmittia albipennis|CH-eik28|Elisabeth Sturj|BOLD: AAG6458  
Pseudosmittia albipennis|CH-eik31|Elisabeth Sturj|BOLD: AAG6458  
Pseudosmittia albipennis|CH-eik115|Elisabeth Sturj|BOLD: AAG6458  
Pseudosmittia albipennis|CH-eik52|Elisabeth Sturj|BOLD: AAG6458  
Pseudosmittia|BIOUG08180-C03|Kate Perez|BIN Taxonomy Match|BOLD: AAG6458  
Pseudosmittia|BIOUG07408-D04|Kate Perez|BIN Taxonomy Match|BOLD: AAG6458  
Pseudosmittia|BIOUG07928-C10|Kate Perez|BIN Taxonomy Match|BOLD: AAG6458  
Pseudosmittia|BIOUG07566-H02|Kate Perez|BIN Taxonomy Match|BOLD: AAG6458  
Pseudosmittia|BIOUG07928-D08|Kate Perez|BIN Taxonomy Match|BOLD: AAG6458  
Pseudosmittia|BIOUG07944-B09|Kate Perez|BIN Taxonomy Match|BOLD: AAG6458  
Pseudosmittia|BIOUG07410-H02|Kate Perez|BIN Taxonomy Match|BOLD: AAG6458  
Pseudosmittia|BIOUG07413-H06|Kate Perez|BIN Taxonomy Match|BOLD: AAG6458  
Pseudosmittia|BIOUG08135-A09|Kate Perez|BIN Taxonomy Match|BOLD: AAG6458  
Pseudosmittia|BIOUG07928-C12|Kate Perez|BIN Taxonomy Match|BOLD: AAG6458  
Pseudosmittia|BIOUG07928-F12|Kate Perez|BIN Taxonomy Match|BOLD: AAG6458  
Pseudosmittia albipennis|CH-eik04|Elisabeth Sturj|BOLD: AAG6458  
Pseudosmittia|BIOUG07930-D09|Kate Perez|BIN Taxonomy Match|BOLD: AAG6458  
Pseudosmittia|BIOUG07413-H05|Kate Perez|BIN Taxonomy Match|BOLD: AAG6458  
Pseudosmittia|BIOUG07928-A12|Kate Perez|BIN Taxonomy Match|BOLD: AAG6458  
Pseudosmittia|BIOUG07930-G06|Kate Perez|BIN Taxonomy Match|BOLD: AAG6458  
Pseudosmittia|BIOUG07928-B01|Kate Perez|BIN Taxonomy Match|BOLD: AAG6458  
Pseudosmittia|BIOUG07928-F01|Kate Perez|BIN Taxonomy Match|BOLD: AAG6458  
Pseudosmittia|BIOUG07928-G06|Kate Perez|BIN Taxonomy Match|BOLD: AAG6458  
Pseudosmittia|BIOUG07760-G02|Kate Perez|BIN Taxonomy Match|BOLD: AAG6458  
Pseudosmittia|BIOUG07753-E01|Kate Perez|BIN Taxonomy Match|BOLD: AAG6458  
Pseudosmittia|BIOUG08127-F01|Kate Perez|BIN Taxonomy Match|BOLD: AAG6458  
Pseudosmittia|BIOUG07759-C11|Kate Perez|BIN Taxonomy Match|BOLD: AAG6458  
Pseudosmittia|BIOUG07810-E10|Kate Perez|BIN Taxonomy Match|BOLD: AAG6458  
Pseudosmittia NHRS sp. A|NHRS-BYWS00000573|Yngve Brodin|morphology|BOLD: AAG6458  
Pseudosmittia|BIOUG07945-G03|Kate Perez|BIN Taxonomy Match|BOLD: AAG6458  
Pseudosmittia|BIOUG07754-E03|Kate Perez|BIN Taxonomy Match|BOLD: AAG6458  
Pseudosmittia|BIOUG08136-C02|Kate Perez|BIN Taxonomy Match|BOLD: AAG6458  
Pseudosmittia|BIOUG07755-C12|Kate Perez|BIN Taxonomy Match|BOLD: AAG6458  
Pseudosmittia|BIOUG07758-G12|Kate Perez|BIN Taxonomy Match|BOLD: AAG6458  
Pseudosmittia|BIOUG05778-H05|Kate Perez|BIN Taxonomy Match|BOLD: AAG6458  
Pseudosmittia|BIOUG07759-H04|Kate Perez|BIN Taxonomy Match|BOLD: AAG6458  
Pseudosmittia|BIOUG07809-E07|Kate Perez|BIN Taxonomy Match|BOLD: AAG6458  
Pseudosmittia|BIOUG07928-G09|Kate Perez|BIN Taxonomy Match|BOLD: AAG6458  
Pseudosmittia|BIOUG07810-H05|Kate Perez|BIN Taxonomy Match|BOLD: AAG6458  
Pseudosmittia|BIOUG07569-E01|Kate Perez|BIN Taxonomy Match|BOLD: AAG6458  
Pseudosmittia|BIOUG07413-F03|Kate Perez|BIN Taxonomy Match|BOLD: AAG6458  
Pseudosmittia|BIOUG07945-B07|Kate Perez|BIN Taxonomy Match|BOLD: AAG6458  
Pseudosmittia|BIOUG07810-D01|Kate Perez|BIN Taxonomy Match|BOLD: AAG6458  
Pseudosmittia|BIOUG08127-A05|Kate Perez|BIN Taxonomy Match|BOLD: AAG6458  
Pseudosmittia|BIOUG07759-B08|Kate Perez|BIN Taxonomy Match|BOLD: AAG6458  
Pseudosmittia|BIOUG07759-E10|Kate Perez|BIN Taxonomy Match|BOLD: AAG6458  
Pseudosmittia|BIOUG07945-D05|Kate Perez|BIN Taxonomy Match|BOLD: AAG6458  
Pseudosmittia|BIOUG07410-F10|Kate Perez|BIN Taxonomy Match|BOLD: AAG6458  
Pseudosmittia|BIOUG07568-F08|Kate Perez|BIN Taxonomy Match|BOLD: AAG6458  
Pseudosmittia|BIOUG07413-A11|Kate Perez|BIN Taxonomy Match|BOLD: AAG6458  
Pseudosmittia|BIOUG07569-F02|Kate Perez|BIN Taxonomy Match|BOLD: AAG6458  
Pseudosmittia|BIOUG07945-D12|Kate Perez|BIN Taxonomy Match|BOLD: AAG6458  
Pseudosmittia|BIOUG08179-B12|Kate Perez|BIN Taxonomy Match|BOLD: AAG6458  
Pseudosmittia|BIOUG06274-D09|Kate Perez|BIN Taxonomy Match|BOLD: AAG6458  
Pseudosmittia albipennis|CH-eik03|Elisabeth Sturj|BOLD: AAG6458  
Pseudosmittia|BIOUG07413-B04|Kate Perez|BIN Taxonomy Match|BOLD: AAG6458

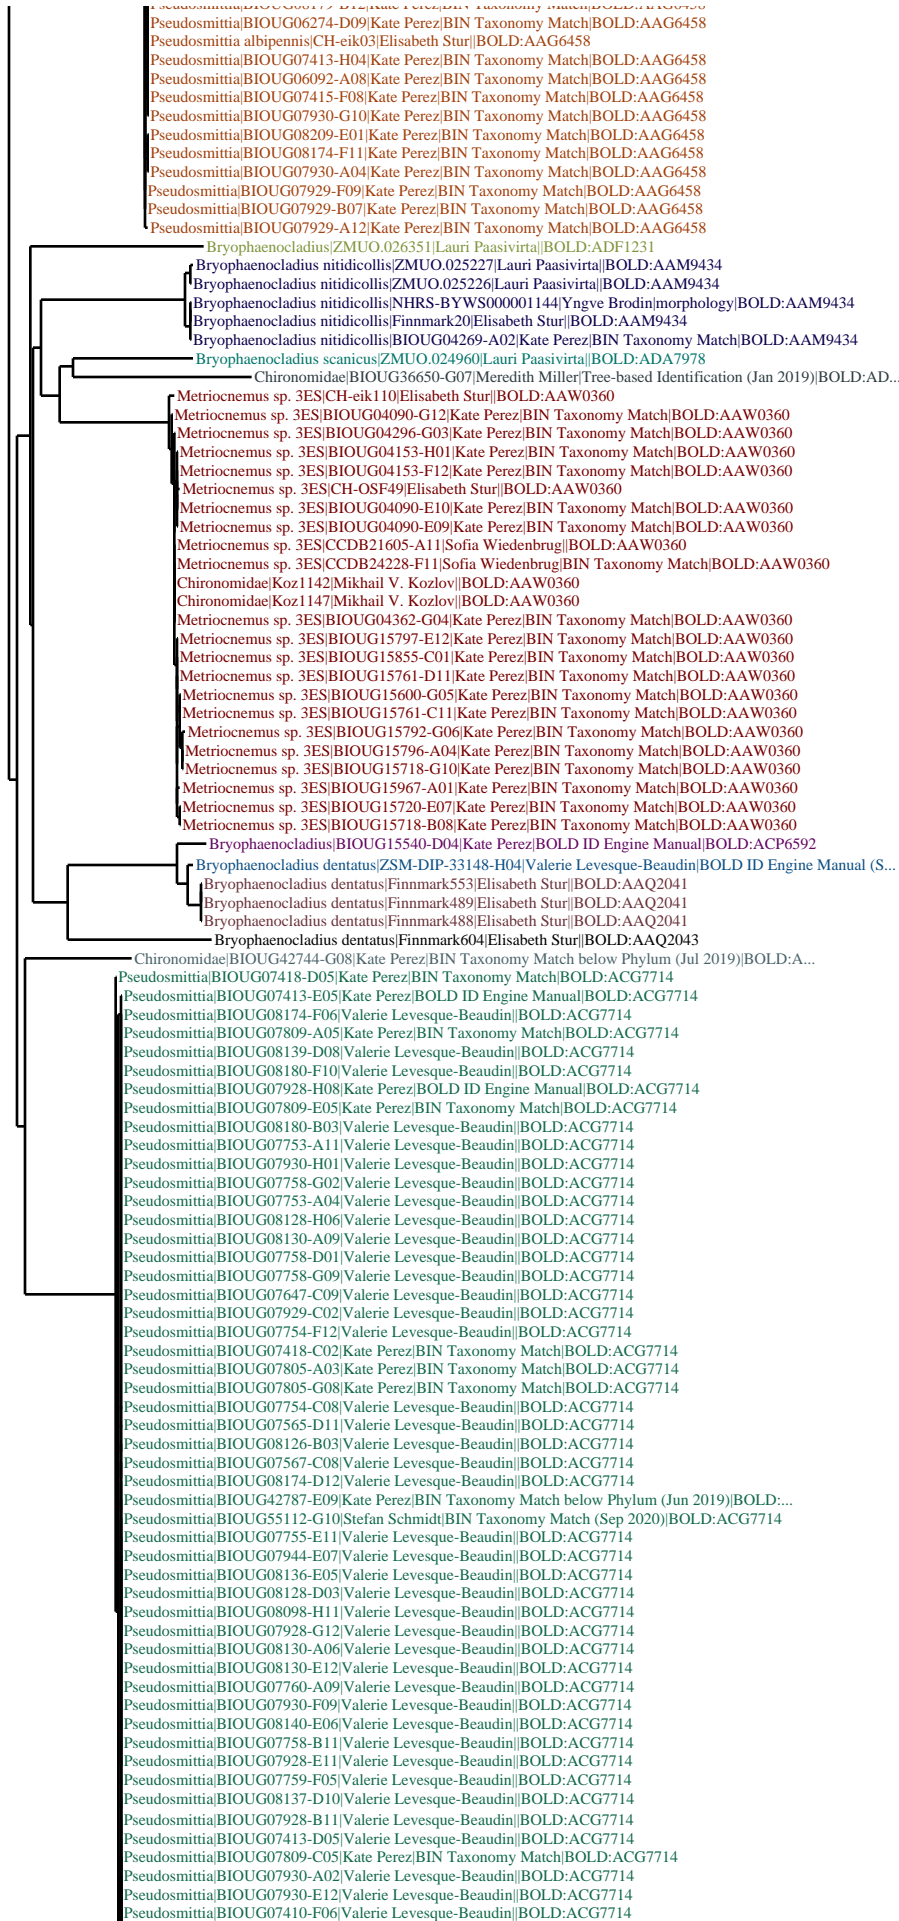

Pseudosmittia|BIOUG07930-A02|Valerie Levesque-Beaudin|BOLD:ACG7714  
Pseudosmittia|BIOUG07930-E12|Valerie Levesque-Beaudin|BOLD:ACG7714  
Pseudosmittia|BIOUG07410-F06|Valerie Levesque-Beaudin|BOLD:ACG7714  
Pseudosmittia|BIOUG07928-G04|Valerie Levesque-Beaudin|BOLD:ACG7714  
Pseudosmittia|BIOUG06275-G08|Valerie Levesque-Beaudin|BOLD:ACG7714  
Pseudosmittia|BIOUG07413-G04|Valerie Levesque-Beaudin|BOLD:ACG7714  
Pseudosmittia|BIOUG07808-A05|Kate Perez|BIN Taxonomy Match|BOLD:ACG7714  
Pseudosmittia|BIOUG07810-F05|Valerie Levesque-Beaudin|BOLD:ACG7714  
Pseudosmittia|BIOUG08209-E12|Valerie Levesque-Beaudin|BOLD:ACG7714  
Pseudosmittia|BIOUG07944-B06|Valerie Levesque-Beaudin|BOLD:ACG7714  
Pseudosmittia|BIOUG07567-C12|Valerie Levesque-Beaudin|BOLD:ACG7714  
Pseudosmittia|BIOUG07567-F10|Kate Perez|BIN Taxonomy Match|BOLD:ACG7714  
Pseudosmittia|BIOUG08180-H03|Valerie Levesque-Beaudin|BOLD:ACG7714  
Pseudosmittia|BIOUG07566-B02|Valerie Levesque-Beaudin|BOLD:ACG7714  
Pseudosmittia|BIOUG07565-H06|Valerie Levesque-Beaudin|BOLD:ACG7714  
Pseudosmittia|BIOUG08139-D07|Valerie Levesque-Beaudin|BOLD:ACG7714  
Pseudosmittia|BIOUG08211-B03|Valerie Levesque-Beaudin|BOLD:ACG7714  
Pseudosmittia|BIOUG07930-F05|Valerie Levesque-Beaudin|BOLD:ACG7714  
Pseudosmittia|BIOUG07567-F04|Kate Perez|BIN Taxonomy Match|BOLD:ACG7714  
Pseudosmittia|BIOUG07808-E10|Kate Perez|BOLD ID Engine Manual|BOLD:ACG7714  
Pseudosmittia|BIOUG07565-A05|Kate Perez|BIN Taxonomy Match|BOLD:ACG7714  
Pseudosmittia|BIOUG07415-F11|Kate Perez|BIN Taxonomy Match|BOLD:ACG7714  
Pseudosmittia|BIOUG07418-B07|Kate Perez|BOLD ID Engine Manual|BOLD:ACG7714  
Pseudosmittia|BIOUG07808-G03|Kate Perez|BIN Taxonomy Match|BOLD:ACG7714  
Pseudosmittia|BIOUG07929-D01|Kate Perez|BOLD ID Engine Manual|BOLD:ACG7714  
Pseudosmittia|BIOUG07930-F10|Kate Perez|BIN Taxonomy Match|BOLD:ACG7714  
Pseudosmittia|BIOUG08174-F07|Valerie Levesque-Beaudin|BOLD:ACG7714  
Pseudosmittia|BIOUG07930-E03|Valerie Levesque-Beaudin|BOLD:ACG7714  
Pseudosmittia|BIOUG07569-G10|Valerie Levesque-Beaudin|BOLD:ACG7714  
Pseudosmittia|BIOUG08179-A07|Valerie Levesque-Beaudin|BOLD:ACG7714  
Pseudosmittia|BIOUG08180-A06|Valerie Levesque-Beaudin|BOLD:ACG7714  
Pseudosmittia|BIOUG07646-E05|Kate Perez|BIN Taxonomy Match|BOLD:ACG7714  
Pseudosmittia|BIOUG07930-E05|Valerie Levesque-Beaudin|BOLD:ACG7714  
Pseudosmittia|BIOUG08174-D10|Valerie Levesque-Beaudin|BOLD:ACG7714  
Pseudosmittia|BIOUG08180-F03|Valerie Levesque-Beaudin|BOLD:ACG7714  
Pseudosmittia|BIOUG08209-A08|Valerie Levesque-Beaudin|BOLD:ACG7714  
Pseudosmittia|BIOUG08174-E10|Valerie Levesque-Beaudin|BOLD:ACG7714  
Pseudosmittia|BIOUG07755-G04|Valerie Levesque-Beaudin|BOLD:ACG7714  
Pseudosmittia|BIOUG08180-G07|Valerie Levesque-Beaudin|BOLD:ACG7714  
Pseudosmittia|BIOUG08180-H02|Valerie Levesque-Beaudin|BOLD:ACG7714  
Pseudosmittia|BIOUG08131-A03|Valerie Levesque-Beaudin|BOLD:ACG7714  
Pseudosmittia|BIOUG07414-H10|Valerie Levesque-Beaudin|BOLD:ACG7714  
Pseudosmittia|BIOUG08135-D08|Valerie Levesque-Beaudin|BOLD:ACG7714  
Pseudosmittia|BIOUG08098-E12|Valerie Levesque-Beaudin|BOLD:ACG7714  
Pseudosmittia|BIOUG08139-F11|Valerie Levesque-Beaudin|BOLD:ACG7714  
Pseudosmittia|BIOUG08139-F07|Valerie Levesque-Beaudin|BOLD:ACG7714  
Pseudosmittia|BIOUG08130-H06|Valerie Levesque-Beaudin|BOLD:ACG7714  
Pseudosmittia|BIOUG08138-A02|Valerie Levesque-Beaudin|BOLD:ACG7714  
Pseudosmittia|BIOUG08132-A08|Valerie Levesque-Beaudin|BOLD:ACG7714  
Pseudosmittia|BIOUG07758-G07|Valerie Levesque-Beaudin|BOLD:ACG7714  
Pseudosmittia|BIOUG07759-E12|Valerie Levesque-Beaudin|BOLD:ACG7714  
Pseudosmittia|BIOUG07810-D11|Valerie Levesque-Beaudin|BOLD:ACG7714  
Pseudosmittia|BIOUG07760-A10|Valerie Levesque-Beaudin|BOLD:ACG7714  
Pseudosmittia|BIOUG07760-D08|Valerie Levesque-Beaudin|BOLD:ACG7714  
Pseudosmittia|BIOUG07760-F06|Valerie Levesque-Beaudin|BOLD:ACG7714  
Pseudosmittia|BIOUG07760-F09|Valerie Levesque-Beaudin|BOLD:ACG7714  
Pseudosmittia|BIOUG07647-C08|Valerie Levesque-Beaudin|BOLD:ACG7714  
Pseudosmittia|BIOUG07415-D12|Kate Perez|BIN Taxonomy Match|BOLD:ACG7714  
Pseudosmittia|BIOUG08139-C05|Valerie Levesque-Beaudin|BOLD:ACG7714  
Pseudosmittia|BIOUG08139-F08|Valerie Levesque-Beaudin|BOLD:ACG7714  
Pseudosmittia|BIOUG08136-D04|Valerie Levesque-Beaudin|BOLD:ACG7714  
Pseudosmittia|BIOUG08094-G12|Valerie Levesque-Beaudin|BOLD:ACG7714  
Pseudosmittia|BIOUG07810-C07|Valerie Levesque-Beaudin|BOLD:ACG7714  
Pseudosmittia|BIOUG08134-F07|Valerie Levesque-Beaudin|BOLD:ACG7714  
Pseudosmittia|BIOUG07415-D09|Kate Perez|BIN Taxonomy Match|BOLD:ACG7714  
Pseudosmittia|BIOUG07415-F10|Kate Perez|BIN Taxonomy Match|BOLD:ACG7714  
Pseudosmittia|BIOUG06095-C06|Valerie Levesque-Beaudin|BOLD:ACG7714  
Pseudosmittia|BIOUG07805-F03|Kate Perez|BOLD ID Engine Manual|BOLD:ACG7714  
Pseudosmittia|BIOUG06274-F11|Valerie Levesque-Beaudin|BOLD:ACG7714  
Pseudosmittia|BIOUG07805-F01|Kate Perez|BIN Taxonomy Match|BOLD:ACG7714  
Pseudosmittia|BIOUG07945-G06|Valerie Levesque-Beaudin|BOLD:ACG7714  
Pseudosmittia|BIOUG07759-E02|Valerie Levesque-Beaudin|BOLD:ACG7714  
Pseudosmittia|BIOUG07753-D06|Valerie Levesque-Beaudin|BOLD:ACG7714  
Pseudosmittia|BIOUG08211-B06|Valerie Levesque-Beaudin|BOLD:ACG7714  
Pseudosmittia|BIOUG07753-D08|Valerie Levesque-Beaudin|BOLD:ACG7714  
Pseudosmittia|BIOUG08134-H04|Valerie Levesque-Beaudin|BOLD:ACG7714  
Pseudosmittia|BIOUG08128-D09|Valerie Levesque-Beaudin|BOLD:ACG7714  
Pseudosmittia|BIOUG08128-F11|Valerie Levesque-Beaudin|BOLD:ACG7714  
Pseudosmittia|BIOUG07759-G11|Valerie Levesque-Beaudin|BOLD:ACG7714  
Pseudosmittia|BIOUG08174-A08|Valerie Levesque-Beaudin|BOLD:ACG7714  
Pseudosmittia|BIOUG08209-H01|Valerie Levesque-Beaudin|BOLD:ACG7714  
Pseudosmittia|BIOUG08180-H04|Valerie Levesque-Beaudin|BOLD:ACG7714  
Pseudosmittia|BIOUG08370-C12|Valerie Levesque-Beaudin|BOLD:ACG7714  
Pseudosmittia|BIOUG08139-B10|Valerie Levesque-Beaudin|BOLD:ACG7714  
Pseudosmittia|BIOUG08129-E06|Valerie Levesque-Beaudin|BOLD:ACG7714  
Pseudosmittia|BIOUG08174-C10|Valerie Levesque-Beaudin|BOLD:ACG7714  
Pseudosmittia|BIOUG07414-B05|Valerie Levesque-Beaudin|BOLD:ACG7714  
Pseudosmittia|BIOUG07753-D05|Valerie Levesque-Beaudin|BOLD:ACG7714  
Pseudosmittia|BIOUG08137-C12|Valerie Levesque-Beaudin|BOLD:ACG7714  
Pseudosmittia|BIOUG07414-C11|Valerie Levesque-Beaudin|BOLD:ACG7714  
Pseudosmittia|BIOUG08125-C06|Valerie Levesque-Beaudin|BOLD:ACG7714  
Pseudosmittia|BIOUG07566-H07|Valerie Levesque-Beaudin|BOLD:ACG7714  
Pseudosmittia|BIOUG08095-A07|Valerie Levesque-Beaudin|BOLD:ACG7714  
Pseudosmittia|BIOUG08127-C10|Valerie Levesque-Beaudin|BOLD:ACG7714  
Pseudosmittia|BIOUG07810-A09|Valerie Levesque-Beaudin|BOLD:ACG7714  
Pseudosmittia|BIOUG08132-E02|Valerie Levesque-Beaudin|BOLD:ACG7714  
Pseudosmittia|BIOUG08133-D04|Valerie Levesque-Beaudin|BOLD:ACG7714  
Pseudosmittia|BIOUG08131-A04|Valerie Levesque-Beaudin|BOLD:ACG7714  
Pseudosmittia|BIOUG08134-F11|Valerie Levesque-Beaudin|BOLD:ACG7714  
Pseudosmittia|BIOUG08094-E08|Valerie Levesque-Beaudin|BOLD:ACG7714  
Pseudosmittia|BIOUG08180-G05|Valerie Levesque-Beaudin|BOLD:ACG7714  
Pseudosmittia|BIOUG08140-H07|Valerie Levesque-Beaudin|BOLD:ACG7714  
Pseudosmittia|BIOUG08174-A10|Valerie Levesque-Beaudin|BOLD:ACG7714
